# Supplementary material for: Proteomic and metabolomic profiling of acupuncture for migraine reveals a correlative link via energy metabolism
Source: Front Neurosci. 2022 Sep 29;16:1013328. doi: 10.3389/fnins.2022.1013328 (PMC9557737; doi:10.3389/fnins.2022.1013328)
Supplement: Supplementary file 9 [file Table_1.XLSX]

## Sheet: Table S1
Acupoints used in the acupuncture treatment
Acupoints	Location	Depth of insertion
Baihui (DU20)	On the head, 5 cun superior to the anterior hairline, on the anterior median line	0.5 to 0.8 cun
Shenting (DU24)	On the head, 0.5 cun superior to the anterior hairline, on the anterior median line	0.5 to 0.8 cun
Benshen (GB13)	On the head, 0.5 cun superior to the anterior hairline, 3 cun lateral to the anterior median line	0.5 to 0.8 cun
Shuaigu (GB8)	On the head, directly superior to the auricular apex, 1.5 cun superior to the temporal hairline	0.5 to 0.8 cun
Fengchi (GB20)	In the anterior region of the neck, inferior to the occipital bone, in the depression between the origins of sternocleidomastoid and the trapezius muscles	0.8 to 1.2 cun
