# Supplementary material for: Proteomic and metabolomic profiling of acupuncture for migraine reveals a correlative link via energy metabolism
Source: Front Neurosci. 2022 Sep 29;16:1013328. doi: 10.3389/fnins.2022.1013328 (PMC9557737; doi:10.3389/fnins.2022.1013328)
Supplement: Supplementary file 11 [file Table_3.XLSX]

## Sheet: Table S3
polarity	peak_name	mz	rt	H1	H2	H3	H4	H5	H6	H7	H8	H9	H10	M1	M2	M3	M4	M5	M6	M7	M8	M9	M10	M11	M12	M13	M14	M15	M16	M17	M18	M19	M20	A1	A2	A3	A4	A5	A6	A7	A8	A9	A10	A11	A12	A13	A14	A15	A16
NEG	M61T49	60.994	48.837	10264.3	16547.7	9187.29	8950.98	7695.18	7810.67	10914.9	10538.4	12389	12468.5	12212.5	9706.86	12307.7	11415.7	14780.6	11389.9	10517.6	10764.4	10220.6	14796.4	1115.31	13811.7	14948.9	15475.3	9471.28	11133.4	11066.3	12277.2	13699.4	14782.3	7741.26	10558	13367.2	13167.2	15799.6	12765.1	9508.25	11515.6	5848.02	15037.7	9445.42	16128.6	10556.8	7906.34	13175.2	13476.2
NEG	M62T35_1	61.8049	35.213	38216.9	4071.82	25865.4	33559.6	40474.4	19326	32085.7	28822	25707.1	29546	32922.9	30226.7	25859.6	35747.9	20490.2	28979.6	20738.9	20422.2	20766.6	20838.6	23499.8	21240.2	24647.3	28357.1	29697.2	22317.8	22496.4	18532.6	31570.9	22474.3	12753.3	32754.9	17122.3	24840.5	27355	20963.9	25634.5	19017.7	27388.4	13383.3	25859.5	28055.6	18327.7	21028.1	24539	63577
NEG	M62T665	61.8053	665.095	6559.57	9434.69	8053.84	6710.74	7908.87	6545.9	6183.21	4540.03	6904.5	4068.31	7493.05	8101.44	6715.58	6865.3	7653.29	7560.43	1307.08	5491.96	7466.18	6388.78	7698.31	8391.23	6266.17	5225.65	7284.36	6600.51	7677.36	5815.74	7791.09	6164.27	7299.52	2888.61	958.307	7414.62	7118.06	3743.84	6397.92	6958	7753.55	5680.06	7094.49	6725.99	7443.61	1445.91	7062.78	7389.34
NEG	M62T35_2	61.9901	34.549	1.12626e+07	8.85261e+06	9.43163e+06	1.07605e+07	1.22698e+07	7.72663e+06	1.52892e+07	2.63637e+07	1.58274e+07	1.95575e+07	1.01958e+07	1.68857e+07	1.09706e+07	1.70214e+07	1.006e+07	1.19807e+07	1.58066e+07	9.49793e+06	7.53161e+06	9.92765e+06	8.26841e+06	999432	1.09163e+07	1.40777e+07	9.75224e+06	7.94814e+06	7.5326e+06	7.95159e+06	1.03538e+07	8.59522e+06	7.8966e+06	1.13684e+07	1.55114e+07	1.64921e+07	1.18974e+07	1.22477e+07	1.01272e+07	9.0579e+06	1.18924e+07	9.66172e+06	1.34171e+07	1.01113e+07	1.85426e+07	9.29559e+06	1.16293e+07	1.11415e+07
NEG	M62T623	61.99	622.624	1.28566e+07	1.39626e+07	1.31195e+07	1.24921e+07	1.08388e+07	1.47951e+07	1.34664e+07	1.30209e+07	1.26282e+07	1.06934e+07	6.03198e+06	7.02477e+06	1.38765e+07	8.86729e+06	2.07983e+07	1.23976e+07	1.10251e+07	1.51037e+07	4.61619e+06	1.17486e+07	1.21224e+07	1.2903e+07	227936	2.57827e+07	1.40121e+07	2.87147e+07	9.59783e+06	2.76151e+07	1.33282e+07	2.78488e+07	1.25415e+07	6.31923e+06	1.36459e+07	2.82348e+07	1.25874e+07	241394	260261	1.20946e+07	348347	12118923	2.56103e+07	6.92598e+06	2.45358e+07	1.11455e+07	1.31241e+07	1.97826e+07
NEG	M62T77	61.989	77.1495	1.1322e+07	1.17945e+07	9.27663e+06	1.11608e+07	1.05062e+07	9.85821e+06	8.93855e+06	1.31888e+07	8.47603e+06	1.11232e+07	9.11866e+06	9.90447e+06	10410136	9.32327e+06	9.66997e+06	9.51986e+06	1.0312e+07	9.49604e+06	3.83591e+06	1.12994e+07	7.30954e+06	1.49576e+07	9.39044e+06	8.98851e+06	1.28086e+07	1.11611e+07	1.16559e+07	9.03259e+06	1.00519e+07	9.57113e+06	9.50065e+06	9.0168e+06	4.33278e+06	1.3302e+07	9.15947e+06	9.38787e+06	9.75847e+06	9.98155e+06	1.03344e+07	1.14897e+07	2.93655e+06	9.45436e+06	8.95844e+06	1.04819e+07	9.41384e+06	9.35592e+06
NEG	M63T35_1	62.5218	34.9705	3341.7	2190.72	3367.52	2155.46	3877.54	1259.45	1512.54	1545.88	1703.76	3411.29	3338.96	1591.23	2932.5	2287.04	3020.03	1769.74	2324.69	1617.81	2411.82	1806.59	3045.04	1950.19	1839.75	2014.26	2910.84	2436.37	2548.22	2948.7	4032.51	3039.13	1934.3	3095.41	3581.37	3522.08	3563.76	4108.9	2426.18	2103.65	4172.05	2702.52	2585.4	3217.24	3683.13	2261.68	2092.67	3224.48
NEG	M63T482	62.9649	482.282	16336	14474.6	19779.9	17449.4	14053.2	12788.6	22688.1	17998.4	27028.9	10868.7	20755.7	15757.8	16081.3	20774.7	34451.6	23089.7	12219.8	13266.5	6341.42	12524.5	13091.7	14758.8	13570.2	29262.2	6670.21	11070.2	14037.5	29360	25940.2	31424.3	12283.7	11829.7	10624.2	19603.2	26649.3	36842.9	12728	18128.8	11151.2	15580.9	18997.2	5012.29	21841	15898.6	25501.5	25031.4
NEG	M63T287	62.9649	287.467	2484.41	1854.42	3136.27	2126.85	2565.03	1738.44	1492.48	1372.58	3734.28	2129.79	835.275	1479.11	1092.43	1370.49	1075.75	1069.6	1165.57	1328.29	1142.27	1298.82	925.666	1391.11	1251.22	1275.34	1652.65	1097	1175.49	1286	1435.07	1354.68	1088.32	923.606	1156.72	1328.94	1093.65	1172.06	869.472	965.621	1068.68	1256.26	1191.97	1087.65	1343.07	1333.21	1214.49	1585.08
NEG	M63T35_2	62.9863	35.147	43960.8	33306.9	34686.5	42975	59290	28709.1	42902.6	40625.4	45275.3	41237.2	40472.5	47632.5	56017.4	53631.1	34408	45850	38947.2	33360.4	32426.8	38598.6	26771.2	41333.6	39428.8	39092.7	30453.5	32052.1	30739.3	26593.8	44432.4	29841.8	24411.3	42540.7	55024.2	42774.9	48758.5	48724.4	34144	31086.9	42461.8	52053	27900.7	41289.7	52064.8	37418.1	49376.2	62300.2
NEG	M63T699	62.9862	699.379	8297.15	9809.06	8591.72	6388.77	8108.75	5779.92	6664.71	10204.3	11406.2	5736.56	7543.46	6819.01	6779.35	6737	6446.19	5817.17	7379.05	6675.72	7124.76	5726.24	10425.8	1351.03	6485.42	7118.07	6136.04	11137.1	3382.29	7131.31	5980.92	6205.59	6581.49	8475.09	5871.05	7778.44	6702.16	6428.8	5201.69	11008.9	5917.27	7555.77	1363.91	12073.7	9749.4	6627.06	6354.14	7886.49
NEG	M63T671	62.9862	670.858	11871.4	9788.92	17532.9	8671.47	8333.71	7474.92	8008.15	9142.01	3596.43	7291.31	9398.48	8086.11	8332.2	7999.56	8192.65	17100.4	7919.95	8121.15	8025.47	7628.91	8500.8	9676.58	8075.87	12258.6	6161.12	6058.88	8075.12	4339.19	7553.28	13205.2	8582.56	7816.77	7020.46	9712.68	8057.84	11865	13505.2	12056.1	8410.89	8823.73	12239	7629.19	10588.9	7774.32	8937.2	7057.08
NEG	M63T644	62.9862	644.255	9048.23	925.405	6900.33	94423.9	10764.3	10820	13090.1	6048.97	5295.83	14866.7	12615.6	10953.1	16897.1	12075.5	12607.7	8917.1	11100.6	12267.7	11247.7	3410.48	13038.8	17865.9	14435.9	12509.6	13931.5	13508.6	20748.3	7433.16	13021.9	17662.4	13757	11003.8	7851.55	21406.8	12167.6	20337	9951.88	7858.62	15330.1	13740.3	11644.8	8447.02	7533.3	11656.2	12037.6	8210.03
NEG	M64T327	63.9631	327.474	806.04	920.582	1053.9	1099.22	795.049	714.318	678.305	800.454	653.879	851.933	1092.99	1121.04	795.882	849.08	728.443	1302.02	1142.1	884.953	680.705	732.385	1080.87	1172.88	1100.12	1120.84	883.702	559.547	979.052	622.766	1160.98	751.775	1138.23	668.021	1874.72	665.311	681.078	813.235	1008.44	1047.62	946.937	795.116	726.204	1479.55	537.551	856.218	1305.2	870.351
NEG	M64T131	63.9634	131.282	21985.3	55431.2	9600.03	28914.7	12391.1	12679.1	14774.1	11630.3	17619.5	18447.6	17002.2	5982.77	6303.59	10626.1	6315.62	8553.67	4280.19	7899.93	19377.4	18435.9	16388.9	25692.3	13792	13918.2	22019	17331.2	18798	16152.2	15466.9	14775.7	16762.9	4364.59	14788.6	9722.63	10912.4	9526.23	16306.3	15960.3	12836.3	18660.4	15233.7	8031.93	14455.3	15422.1	24075.1	16724.5
NEG	M64T35	63.9936	35.1525	89406.7	66536.5	77257.9	100646	95415.7	62288.2	96032.2	65198.8	91789.6	147024	79194.5	90834	90301	134939	75008.5	91668	78601.2	78351.3	106568	79365.5	70248.1	85030.5	87331.3	80055.4	79236.2	61189.6	63100.7	66043.1	79053.7	69653.2	78656.7	90299.2	78761.1	89205.9	105301	107946	70564.6	75855.9	85591.1	112802	74022.5	153145	138399	73502.6	102313	142277
NEG	M64T623	63.9935	622.606	21630.3	1699.13	8700.16	13107	8374.47	92570.6	43314	1764.58	1447.35	1664.51	1866.34	34470.2	25871.8	1793.34	25420.3	9874.5	1445.82	7548.26	8100.23	37768.3	8955.45	73421.6	1930.6	15187.4	31256	7731.38	8855.88	1671.51	2767.48	8525.33	9926.58	16077.9	5376.42	38195.4	1732.22	47731.7	6998.03	51998.5	12646.3	11182.9	1425.27	106225	8677.72	1568.54	8680.13	1603.41
NEG	M64T701	63.9936	701.308	22942.8	17776.9	23411.5	17886.2	21955.5	22917.6	22766	24921.1	43936.8	14758.4	27989.8	25943.8	4947.61	16430	20802.8	19492.3	17154	23369.4	28734.4	20381.1	15779.8	27559.6	66584.5	3182.09	20804.1	19868.5	15245	16582.9	20168.9	24916.2	4045.01	7770.18	23912.6	29492.4	29266.8	27230.4	19013.9	20497.6	22167.1	21484.5	36068.1	21975.2	14188.2	37062	32892.7	71230.2
NEG	M65T24	65.0172	24.468	19890	3227.65	16210.7	12940.7	9191.42	17978.3	12952.6	11656.2	8956.63	5264.48	5465.75	5824.66	18019.4	7484.28	533.365	8445.51	2178.41	2851.57	2108.45	3507.02	4243.91	4139.5	1798.59	14595	5226.95	6026.48	2663.81	7105.3	2905.12	3812.91	1701.95	5638.02	5292.64	30960.8	34273.7	7391.52	6865.93	9214.69	4806.85	2836.31	24310.2	16399	24029.3	25443.5	25081.5	20638.6
NEG	M65T162	65.0151	161.663	1630.29	8637.75	1891.08	1864.18	2725.54	1547.06	1590.21	4207.16	1608.83	2091.58	1147.9	1198.54	1494.15	1981.95	1551.83	2669.73	1855.04	1104.55	2572.27	2448.26	2400.97	2022.51	2849.53	2162.18	1879.37	1849.88	885.513	3445.12	2237.87	2541.9	1142.56	990.792	11125.4	2503.27	3052.41	2424.11	1376.82	2115.57	1532.84	1642.2	3325.54	1576.79	2606.82	2124.55	2317.4	1642.58
NEG	M65T113	65.0406	112.689	2241.44	1510.71	2184.86	1947.46	1039.15	1489.71	1526.47	1226.2	5392.11	1431.97	1812.42	5169.06	2060.85	2487.77	1630.53	1253.56	865.442	1196.62	879.007	1321.84	1041.88	1278.64	1599.79	3951.43	2238.15	1645.8	2350.42	1489.16	1685.94	1387.28	1177.42	5044.66	1954.82	566.699	2984.63	1792.49	1094.41	5787.97	1635.3	1534.15	1052.87	754.483	2327	15551.7	4794.29	849.051
NEG	M65T23	65.0424	23.444	7680.7	1054.4	7192.7	7389.31	10761.1	5014.88	3823.97	2894.6	5304.77	11402.4	2781.75	3111.71	8908.44	10277.9	9063.78	4483.28	12990.2	1817.17	513.342	2548.33	17500.4	2919.31	4973.25	35313.9	0	4179.19	3353.57	6828.62	1062.24	4403.59	1766.37	3153.78	2368.62	16310.1	19331.3	4204.78	5329.72	7058.42	2558.95	3399.99	14472.5	10430.1	14402	22922.8	5871.97	5809.84
NEG	M66T200	65.9994	200.248	2479.51	5016.27	4792.9	2392.74	4068.1	4077.8	2180.84	4595.57	1782.51	1476.7	1490.51	2056.26	1702.31	2818.15	5642.29	1338.94	3819.34	4173.4	1246.4	5440.15	5444.49	5178.01	1360.55	1764.44	1901.34	4023.28	4683.39	4473.63	1784.49	5806.75	4566.47	1534.55	5437.55	2907.76	3253.84	5499.72	1577.13	2122.61	5279.96	4432.9	2194.34	1917.07	2580.57	4171.33	3850.59	2947.93
NEG	M66T23	66.0016	23.214	58092.2	15723.5	52888.4	46821.9	7837.12	38173.6	39801.9	34188.7	107722	26102.6	20804	40558.9	69047.3	37354.3	12105.9	29486.4	15745.3	15133.4	9343.5	30495.6	40700.6	26711.1	36741.3	45333	16987.6	42299.7	2959.39	12617.5	20046.5	3593.41	2289.84	23006.4	26806.9	84257.2	121923	28988.1	30071.6	53526.5	14526.2	19628.2	71643.3	64038.2	69712.1	78609.2	55986.7	93589
NEG	M66T699	66.0095	698.599	671.185	9742.34	5115.12	6578.3	4856.1	4547.48	11518.9	613.118	5206.79	3670.42	4647.07	4387.89	4516.77	5790.61	3567.36	8836.41	4699.92	4340.84	4539	5107.62	1764.37	4189.23	1189.91	5422.29	4490.55	3878.09	4194.17	5229.89	8240.96	5754.88	5441.67	4551.55	723.609	3999.4	4996.74	7269.11	4113.69	5342.27	7447.43	9400.92	9777.28	8245.92	5806.12	3810.15	4672.32	4629.23
NEG	M66T668	66.0104	668.422	7306.39	4759.2	6938.42	5566.74	4627.09	4659.31	11701.2	6517.16	3522.43	4907.65	6467.67	5352.81	5777.81	6540.38	3545	7779.94	4961.18	5126.71	5522.43	5828.86	6638.77	5343.28	8344.54	8687.75	7120.65	6727.94	5631.92	6662.01	7190.78	6878.57	10947.1	5305.99	6600.89	4163.17	6614.32	6988.7	5529.86	6602	4801.92	5552	8036.27	5902.37	6849.23	6333.24	7061.29	5092.19
NEG	M66T647	66.0094	647.433	7830.6	6721.41	6186.93	5759.88	9022.52	4815.43	6281.51	4813.71	6273.74	4931.96	5983.85	5102.51	5954.63	6708.36	8857.37	681.062	4368.28	8053.76	4390.73	5892.72	6345.1	7391.52	6723.15	6549.25	5122.91	7716.24	4877.42	6173.09	6681.77	6506.3	6446.13	4946.02	7684.45	6734.23	5741.5	6591.62	7460.67	6373.67	7153.07	9232.04	5887.99	5060.74	4745.74	5389.1	8027.85	6188.87
NEG	M68T44	68.0147	43.967	7445.46	979.874	7655	4970.86	91.019	4807.57	3501.36	3772.76	10501.7	3556.52	2118.71	3873.26	4175.24	6405.71	178.603	2497.65	975.097	795.563	229.178	376.504	2901.16	1443.78	740.523	7980.11	1529.09	2972.48	191.053	1404.49	3710.41	260.712	0	2188.49	1666.43	12047	9602.63	995.916	4495.94	4809.31	1594.41	2579.49	9464.31	5599.06	7031.62	9389.45	13167.5	11372.4
NEG	M68T359	68.0514	358.704	296.626	490.671	1281.09	271.656	774.597	491.795	532.74	625.131	722.426	308.926	423.891	746.505	325.205	213.366	1038.04	328.902	503.463	514.801	542.424	419.095	296.695	233.398	257.221	580.253	474.255	271.457	325.255	236.576	291.35	295.707	634.47	564.012	276.378	332.176	542.319	400.998	177.995	286.357	426.465	387.352	419.917	316.83	533.891	953.317	544.838	233.143
NEG	M69T28	68.7934	28.478	7484.96	8386.97	7325.22	7761.09	7648.39	7744.51	9323.39	8113.13	8324.79	5068.51	8458.15	9657.5	7263.32	9316.33	11852.6	8685.42	7446.54	8120.84	8126.34	5954.7	8363.3	7820.15	9522.17	7155.46	8541.91	6341.88	9784.14	7179.66	7309.03	9410.44	8825.17	9370.31	10497.7	7742.65	9432	10094.3	5973.45	11461.1	8991.81	10103.4	6621.05	6352.84	8926.15	5764.46	7917.15	9541.19
NEG	M69T29	68.9998	28.597	3.36072e+06	3.81374e+06	2.75212e+06	2.44386e+06	3.47925e+06	2.65396e+06	2.86883e+06	3.36393e+06	3.0629e+06	2.25257e+06	2.5668e+06	2.9431e+06	3.27625e+06	3.98812e+06	4.2758e+06	3.8618e+06	3.3518e+06	3.49858e+06	3.10896e+06	3.24197e+06	2.95842e+06	4.0146e+06	3.75282e+06	3.36451e+06	3.70106e+06	2.95503e+06	3.43528e+06	3.73906e+06	3.87576e+06	3.41915e+06	3.39398e+06	3.07835e+06	4.64749e+06	3.18517e+06	3.76803e+06	4.19583e+06	2.90901e+06	4.00623e+06	3.78417e+06	3.58901e+06	3.3994e+06	2.286e+06	3.62838e+06	3.29487e+06	2.91943e+06	3.64449e+06
NEG	M69T272	69.0103	272.409	6181.52	6996.73	6755.18	7987.8	7275.05	6708.45	6698.83	6865.02	8154.37	6366.98	6567.78	5640.49	8138.9	9176.64	6508.78	7444.79	5992.72	5871.54	6705.72	6641.24	6680.29	6810.13	6964.81	8718.13	7012.03	6225.53	6700.66	8129.85	6755.59	7622.78	6660	6896.35	8482.94	6942.72	5766.23	7372.18	6156.68	6728.17	6820.68	6265.18	7241.36	6735.84	7383.05	7434.57	8949.46	7303.46
NEG	M69T37	69.01	36.52	14313.2	1392.2	2905.99	3284.03	14095.8	16962.4	2313.53	2399.07	3742.62	6999.22	12379.3	12690.2	13716.7	15109.9	22727.7	16213.9	13222.3	12169	18188.8	13240	10398.3	21923.5	1632.48	3544.92	18933.8	3152.39	20506	1003.85	1945.07	30458.1	20374.2	12053.1	28213	3356.52	3772.53	18037.6	9193.4	2809.61	12534.6	15404.8	3133.18	6749.42	3803.89	3339.9	11479.9	2515.5
NEG	M69T322	69.0354	321.821	1197.47	825.46	1205.05	1769.16	2863.97	1517.32	766.349	1104.42	1103.77	834.796	1246.61	1350.21	1025.33	1238.86	798.061	2935.19	1566.65	841.04	3965.2	2473.83	4885.67	907.723	878.031	2988.46	3813.44	1836.9	1447.31	2310.84	1165.58	912.257	4248.65	1002.37	805.419	930.872	1127.76	2872.97	670.702	1152.45	1950.1	1284.19	2102.43	1166.7	730.467	1707.11	972.583	905.303
NEG	M70T29	70.0026	28.594	39571.4	33738.9	25139.9	20299.3	30562.2	23432.7	21076.5	31387.2	29316.4	25837.7	22551.4	27156.6	26966.7	30230.4	34985.9	38790.5	31274.4	29354.3	28756.6	31081.2	25651.8	34866.1	31504.2	27093.4	37485.6	32070.9	33564.8	30218.4	29741	35095.6	28138	24669.6	39379.8	31005	30588.8	33881.1	23374	32623.5	35028.2	31776.9	35106.9	23475.6	34821	29004.4	18918.4	31915.2
NEG	M70T290	70.0305	289.666	995.098	532.715	731.119	898.876	486.457	877.655	1369.77	847.421	1203.76	664.582	482.93	828.768	658.188	1474.18	371.768	654.338	565.578	418.745	638.236	821.604	746.769	474.99	822.676	869.444	660.489	658.868	240.128	472.531	612.967	275.645	217.579	735.115	571.878	1147.31	1088.77	686.236	498.992	1151.1	608.711	516.378	1047.46	1098.61	638.64	1689.28	1160.43	2225.22
NEG	M71T186	70.9468	185.822	904.105	955.467	1894.26	2012.68	2447	2567.22	2458.53	2982.49	2404.75	2495.71	980.355	2318.61	2934.46	3603.49	2536.06	2410.63	2005.4	2886.09	2530.97	1785.07	2492.65	1092.84	1699.17	2426.76	1991.88	2621.41	2697.72	2686.1	2331.79	2446.96	2709.16	1999.24	2335.23	2246.45	2401.1	2489.49	2605.2	1853.51	2256.35	2088.03	2550.2	3224.72	2665.54	2447.97	2283	3216.17
NEG	M71T295	71.015	294.506	82334.8	84537.7	147711	94398.4	107759	100322	83747.3	108788	94936.4	103035	137698	78625.7	106203	160903	128993	135710	110094	120803	125894	80955.9	87898.5	124117	80260.6	77966.8	79156.9	114467	74091	136028	79379.9	151274	146591	68655.9	149993	72506.2	83365.2	89509	81613.2	79462.2	99289.5	78560.3	85208.1	111419	136195	128956	142584	141362
NEG	M71T224	71.0148	223.718	12801.6	16070.3	12972.7	16652.7	20766.7	12380.4	12964.9	12250.7	10793.3	10281.6	12487.6	13115.7	15507.9	42535.4	15442.3	17967.6	11071.3	26085.1	15781.2	35079.5	22418.9	7882.36	11641.5	42090.8	30085.2	26626.4	9525.57	16268.5	18617.7	33759.3	13165	12034.8	30004.5	31396.9	39137.1	15982.3	11903.4	11899.6	13247.8	15488.7	18277.1	31940.3	15281.1	14609.3	12133.4	11308.9
NEG	M71T80	71.0147	80.159	24870.4	28307.3	16602.9	28232.9	17448.4	14359	21642.2	21131	22483	27930.1	21278.1	14676.4	15514.7	43126.8	23536.6	33135.5	24091.3	18128.6	11714.9	19468.8	35421.4	20881.4	38366.3	14543	25320.7	21824	22148.5	25504.7	17459.1	42980.7	21545.6	20146.1	29909.8	29453.2	50119.1	27390.3	23722.1	29015.1	23761.4	23100.7	36937.9	16948.2	27616.2	27079.7	28093.3	28789.9
NEG	M71T103	71.0146	103.35	20150.7	19560.8	28056.5	35664.2	29688.7	28006.2	20217	27559.7	24908.2	30802.2	46106.4	18152.8	19585.3	56652.7	21866.1	31372.4	25612.6	26079.6	25806.2	24793.6	32640	3073.76	27514	24688.3	37669.2	32140.2	17464.9	18083.3	23710.1	31518.5	32231.1	26658.6	54452.9	25932.9	23797.3	22416.3	23058.6	27116.2	57431.6	16799.2	30175.9	21601	17326.3	30356.3	80732.5	24469
NEG	M71T142	71.051	141.966	14622.9	26621.6	11293.1	14496.2	12558.3	10092.7	17802.2	9534.05	12028.5	14766.3	17589.9	25205.7	18683.1	22652.1	19596.1	18203.9	9540.64	20450.7	11820.8	9619.45	11756	8094.1	16617.8	12355.1	16651.5	8589.89	9171.19	45544.9	13858	14313.2	24745.6	24359.1	16828.5	16086.8	18963.3	17252	8676.39	22190.8	19070.5	8392.04	15073.2	10183.9	24993.1	12708.1	18612.5	12175.4
NEG	M72T239	72.0099	239.459	6427.53	8245.36	7596.47	8442.6	6620.82	6216.56	7993.13	6467.73	5933.5	9189.95	8873.54	7413.65	7741.12	6463.67	6244.67	9040.51	6226.6	6040.32	6620.79	5624.21	6689.92	4980.71	7103.62	6994.91	7224.34	5839.38	6443.36	6844.61	7321.99	6419.66	8845.08	6447.21	10973.2	6152.52	5682.9	7337.19	6469.22	5920.41	9677.83	6066.28	8353.86	5533.4	7562.63	7678.36	7976.74	6838.48
NEG	M72T337	72.01	337.24	11770	13563.4	9254.25	11900	11528.6	8431.28	10166.5	9770.55	9615.4	11122.4	8878.85	12046.4	10973.9	14915.4	8808.76	14709	10225.8	9983.44	8830.8	9222.72	9693.34	9490.77	9952.19	7752.76	12608.7	5699.39	9468.8	8736.05	12367.3	9320.72	9434.31	10218.2	11538.3	7757.41	8265.8	11550.7	7158.48	12377.1	11733.1	8473.86	11260.7	9660.11	13722.8	10222.3	12620.9	7755.51
NEG	M72T359	72.0099	359.28	5182.35	7275.78	6109.95	5371.56	5723.4	4948.87	5379.68	4461.77	5293.85	4557.05	5165.89	6915.9	4815.29	7572.4	4950.66	9015.7	5256.53	4712.9	5280.9	6264.32	5008.55	4878.95	4856.25	4920.78	6907.3	9479.56	4292.76	5239.98	5903.49	5266.96	4995.79	5218.65	7146.69	4977.15	5645.62	6388.63	3861.74	7774.08	5688.76	5495.42	7115.29	4591.44	6269.07	6740.62	6599.21	5073.17
NEG	M72T294	72.018	294.246	2492.81	2894.04	1670.76	4713.27	2409.33	3225.89	1956.96	1350.65	2690.37	2370.6	1783.37	4081.7	4592.52	3222.36	3199.96	3992.49	2288.93	3476.23	3355.23	305.666	3304.27	2839.33	4673.83	4730.89	2386.67	3167.05	3032.58	2278.01	4219.76	4525.32	3532.74	3512.84	2985.97	1362.58	2531.67	2177.64	2297.34	1779.37	3190.13	2518.08	4174.46	2729.37	4296.75	3333.58	2074.62	3355.84
NEG	M73T185	72.944	185.106	2012.61	2354.88	1654.13	2942.48	3370.59	2486.25	2240.64	2583.49	2315.92	2876.45	1317.48	1488.88	3741.89	2408.4	2480.27	2244.2	2973.8	2850.03	1845.12	1961.05	1869.2	1698.32	2144.54	2359.35	2748.19	1362.56	2743.24	2541.51	1757.83	2831.02	1880.97	2988.48	2072.4	978.598	1650.6	2682.58	3098.18	2275.84	2224.76	2339.32	2567.76	3514.39	1987.36	636.779	2418.84	2452.25
NEG	M73T332	72.9706	332.244	40594	37482.7	58121.5	36959	58533.4	4281.8	62797.7	61755.6	64629.6	52951.3	59986.1	58984.3	31228.6	74973.8	72340	68053.9	56346.6	58462.6	32622	62638.6	63587.2	31659.2	66336.6	41459.3	37326	51436.6	58134.6	35512.3	69487.8	36377.5	59277.7	27446.3	41159.5	36694.9	67581.8	42017.5	33089.3	65062.9	64974.9	60218.3	63888	58904.2	70124.8	68762.5	63257.4	62975.4
NEG	M73T302	72.9941	301.607	119640	114986	105322	105352	78275.8	86324.5	121366	118927	132794	130260	124482	124374	128608	104225	125350	98175	119481	99828.7	103538	106943	121337	90507.6	169124	123765	127805	131606	94484.4	98308	151964	149343	121250	111731	98420.7	135338	110917	103299	133160	94567.4	149153	101643	105163	111927	97868.7	97569.6	129048	63812.5
NEG	M73T64	72.994	64.0965	309626	122240	127996	132295	78048.4	191729	172216	187457	207609	211785	222959	249268	240349	195296	154195	254160	164343	99119.8	224098	215685	193887	180146	266342	347398	192911	236043	65533.6	301187	278283	111458	57661.8	280471	265008	343622	433086	254355	382690	451893	272309	183276	413970	232330	361461	389766	254048	274770
NEG	M73T216	73.0123	215.666	3759.25	593.002	4701.09	550.37	3001.8	3189.5	1042.22	3505.19	4272.61	545.983	977.203	695.261	2261.96	1786.86	4122.29	643.954	3608.48	3237.64	3061.19	3965.26	765.111	3293.05	903.049	423.708	671.819	3068.58	555.707	3786.5	1008.02	4426.59	4497.49	3248.18	2687.61	3601.02	3776.72	4266.24	3964.22	4514.43	4265.29	3398.96	4497.11	3350.17	420.093	3287.26	3759.86	560.897
NEG	M73T240	73.0305	240.473	48122.4	24748.7	36872.6	28776.6	31010.4	23372.5	65380.2	18762.6	25272	25776.2	68658.7	40226.9	22667.4	34511	15382	55606.9	16097.8	33470.3	25060.4	15876.7	24327.2	20234.5	22802.1	25733.7	21436.8	19464.6	22089.1	28136.9	19354.1	68457.6	38052.7	24836.2	61234.3	42431.7	15501.4	66497.6	20559	18949.9	27135.6	18530	27386	19814.4	57644.4	26161.5	20480.5	19719.6
NEG	M73T368	73.0304	368.006	19447.2	10455.5	13703.1	11668.3	17045.3	12617.1	12318.6	14380.1	15166.2	13838.7	12501.4	12434.4	18284.5	14325	17921.1	16204.5	14535.5	13846.6	14529.4	11974.2	15414.3	10623.9	18222.8	14323	21663.5	10120.1	12983.7	13691.8	18555.7	15950.9	18338.7	14928	16350.1	12107.6	13304.8	16974.7	16394.6	15926.3	17378.5	15806.8	11232.4	21760.9	13448.3	16514.8	20620.8	16909.9
NEG	M73T16	73.0304	16.224	32596.4	26163.7	28354.6	25276.3	21077.3	16303.9	42644.3	31981.2	33123.1	22554.2	24174.7	33506.8	23057.6	36759.7	30499.1	29705.6	22564.7	17197.6	22020.7	24211.7	4273.34	11468.5	25815.6	41604.6	23785.3	22948.9	19303.4	30942.3	25234.4	31638.1	27056.9	22679.4	29386	22935.2	4342.88	30816	21347.6	26035.5	28311.3	17579.9	29908	21773	17420.8	30165.7	33093.2	27382.6
NEG	M74T303	73.9971	302.597	2451.79	1664.66	2174.09	2543.23	1213	1944.02	2137.67	2246.43	2794.23	2106.21	2863.56	2684.35	2241.25	2205.58	2734	2246.65	2230.49	1554.66	1030.42	3324.14	2556.42	2568.45	1719.17	2279.96	2222.36	2237.6	2883.11	2236.14	2804.97	1714.95	2968.45	2043.92	3502.79	2685.57	2121.2	2456.56	1781.33	2227.04	3940.68	2870.35	1906.06	984.833	3023.64	4086.23	3037.13	2784.69
NEG	M74T66	73.9973	66.08	7636.97	2421.54	3271.84	3645.56	1307.86	3359.99	3067.45	3553.96	3248.19	3005.44	3796.18	5338.29	2359.73	3829.51	2710.97	5043.36	3218.56	2300.94	2321.03	1799.38	2940.94	3441.21	4542.55	6820.39	2463.15	4558.68	2160.05	4484.21	3689.71	3324.55	3285.84	4202.84	4637.29	6374.9	5945.83	5167.97	6198.19	7176.59	3735.92	824.724	6146.81	2907.21	6130.89	6102.52	4243.21	4783.6
NEG	M74T345	74.0257	345.407	62763.5	87911.9	42279.1	84241.4	62234.7	55837.1	61576.2	26968.8	63068.9	27562.5	73044.8	71830.5	66451.3	104166	41035.2	94965.7	67527.3	23959.4	55536.4	65352.6	63099.1	59058.8	62825.1	29441.6	95216.9	39213.8	56551.6	39377.2	82350.7	35623.6	63528.2	65675.6	91362.9	58201.7	77744.1	82020	45156.2	94077	66883.6	52902	74045.2	56797.4	81868.2	72372	43559.3	36527.9
NEG	M74T269	74.0256	269.001	11321.2	6511.01	16561.8	11546.6	10492.7	7423.37	9025.44	8295.39	17871.9	16682.3	10354.6	8852.35	9760.38	17044.8	14669.4	12605	9684.73	8863.05	6984.85	12347.1	12917.7	15575.1	10850.3	22589.9	14869.2	13271.4	12765.3	30293.9	14159.8	20278.2	8467.19	9131.01	8230.22	11354.8	15289.6	10423.9	7271.11	13079.2	7386.13	9550.78	11377.6	10376.7	11700.4	4329.2	22885.7	21503.1
NEG	M74T241	74.0334	240.546	1146.49	639.696	1056.53	522.96	653.191	673.771	594.657	955.424	720.143	858.986	580.383	886.566	478.483	1389.58	1160.35	1519.28	954.719	863.396	588.075	923.39	1035.47	815.478	536.893	1227.08	511.184	927.291	985.479	686.183	1178.36	745.362	1106.98	519.131	926.667	296.318	662.598	1000.5	998.667	1306.19	1187.18	1280.59	1446.28	539.324	620.03	1432.96	375.452	1622.95
NEG	M75T332	74.9686	332.082	6075.44	3064.71	5468.09	2623.37	4699.03	3894.36	5603.19	4849.36	4940.31	4211.44	693.48	5308.91	1267.53	5871.11	6063.95	5896.47	4689.82	4910.5	4281.37	4998.58	5568.08	4325.78	6073.18	3053.18	3112.32	2275.05	2193.25	4593.79	5732.47	6267.18	2992.14	2821.19	3262.14	4626.26	5087.97	3634.04	2809.22	5152.28	10081.5	4935.55	5666.56	2263.64	5928.07	3436.28	4760.13	5499.06
NEG	M75T314	75.0097	313.781	50619.3	45367.1	24321.2	23825.6	32020.5	15501.1	26775.9	22689.7	26379.1	13865.8	27253.9	24808.2	27265.6	27635.3	38808.8	30565.9	23190.2	31176.1	46856.2	25187.4	29252.5	40038.1	26715.4	25158.4	26796.2	21429.3	26004.4	22440.9	32457.3	27300	24397.3	34198.5	65372.7	31256.8	36214.4	69271.3	19736.5	35956.8	20490.1	42762.6	69921.1	24582.5	52750.2	22584.2	27218.1	28105.5
NEG	M75T104	75.0096	104.409	43901.2	42982.9	15098.1	48923.6	24922.5	19834	57110.3	20344.5	23367.6	28589.9	62088.8	29609.7	51333.5	72748.8	50157.7	45005.3	36357.3	28212.8	68946.5	34682.1	45756.9	39387.9	36870.1	47835.2	45917.4	66421.2	32785.4	35133.7	46479.3	60129.9	49808	43446.7	40605.8	63494.1	68230.6	51185.2	36714.3	51452.8	49412.9	37799.2	93103.4	39301.5	45735.6	41993.1	42280.7	48953.8
NEG	M75T267	75.0097	266.509	36400.7	9571.58	22576.3	26692.5	20943.8	17290.8	26482.3	21765.4	28038.9	22586.2	10281.4	33957.6	15234.6	33093.9	15475.7	33665.2	18348	19076.2	9141.43	10262.6	10465.4	7835.93	17362.9	9911.3	10713	8915.17	10608	11256.3	11014.2	14138.5	9498.29	37315.2	9428.04	31236	23180.1	25800.4	25589.9	24630.4	26364.6	9825.93	10896.6	25827.7	28733	11530.8	27602.2	18295.2
NEG	M76T50	75.963	49.523	23765.6	35334	18889.3	26902.2	20291.7	30900.7	22389.7	31151.2	31305.5	41062.4	30610.4	28176.6	29833.1	31249.4	36544.6	26685.2	32142.3	31911.9	32605.2	42013.7	12318.4	40119.7	41099.1	39008	42050.5	34574.3	34556.6	31551.4	42026.8	67958.9	55954.3	21545.5	27070.9	37053.8	33249.9	30204.3	17686.8	33751.5	18166.9	37581.4	29468.5	29673.9	34632.8	33145.3	33385.1	39140.6
NEG	M76T15	75.9632	15.317	61803.3	60736.9	70969.7	31094.7	53092.4	58290.1	45881.2	108650	68074	81686.7	63575.1	53082.9	54727.4	67441.8	91936.8	81719.4	62502.4	58803.7	53475.3	7313.1	20591.6	62734.4	10957.5	84188.9	60704.6	48226.4	53959.2	9912.97	52819.9	92126	67653.1	60893.3	92504.8	54619.7	9262.04	15013.6	50198.3	59821.8	49210.5	51600.5	70409.8	49602.6	73042.6	71288.5	58460.2	51549.7
NEG	M77T49	76.9711	48.9915	180810	219518	122582	147127	132157	158582	147286	195584	192317	201996	308662	258919	156386	235407	314191	138852	217453	203733	214915	243751	69978.5	240927	238075	248873	236870	176746	208707	221008	235717	122178	207363	141862	156596	214558	190355	250137	132715	209907	91822.5	209787	220343	174778	172339	161007	195819	219836
NEG	M77T140	76.9714	140.155	1.3358e+06	879306	1.2448e+06	1.17424e+06	427620	445070	411800	1.36386e+06	1.13716e+06	463371	1.11743e+06	1.07612e+06	658365	1.09998e+06	1.19796e+06	1.12874e+06	1.28778e+06	1.14585e+06	1.29423e+06	1.23427e+06	515060	1.39554e+06	973531	1.32827e+06	1.15804e+06	1.33916e+06	1.04357e+06	1.38929e+06	1.12276e+06	1.15023e+06	1.49079e+06	946850	1.32517e+06	1.38283e+06	475062	1.06131e+06	514495	1.19191e+06	374968	489063	1.15628e+06	1.08412e+06	1.04464e+06	1.38535e+06	1.2903e+06	1.18429e+06
NEG	M77T17	76.9716	16.88	117141	39981	129141	12793.5	31514.1	209514	55652.3	43969.8	26973.1	47901.7	40017.1	203962	147120	29608.5	28446	42307.7	39455.8	27008.9	43136.7	48945.7	74379	145794	252571	26366	28129.2	35601	29862.1	19797.4	24328.2	36961.6	161523	258046	43185.6	248391	29851.4	36432.6	244174	37512.5	30998.2	26441.5	184895	118196	26396.3	59403.7	17480.8	30526.5
NEG	M77T29	77.0185	29.295	2330.72	488.876	3184.39	1281.03	3999.65	276.043	4019.95	244.057	6094.38	3972.85	2330.19	4679.15	459.814	1245.49	8016.09	302.187	5422.09	6191.64	2778.63	380.224	1556.72	540.732	4120.97	2446.44	382.48	2739.99	4121.89	4894.53	396.606	5918.68	3821.66	468.172	5799.45	2166.08	3738.82	327.767	949.883	462.026	557.148	487.11	2827.5	2568.2	4157.07	2765.65	4468.31	4290.2
NEG	M77T109	77.0405	108.578	6866.21	1.64805e+06	8494.73	10464.6	4470.14	5877.55	5735.56	10020.4	11362.1	14819.4	200200	7800.2	12872.4	9129.21	12771.7	8729.8	10507.7	5832.04	8040.63	9169.38	6897.13	31022.4	10055.8	9498.34	6632.1	9616.62	9088.72	10622.7	237006	8185.35	14619	5459.48	13101.8	9367.11	8121.86	7855.12	6950.47	16124.3	23125.8	4349.85	274399	5222.18	10280	12491.7	11041	8000.8
NEG	M78T15	77.9704	15.097	26958.7	18680.5	12832.1	25966.2	25479.8	15649	19487	25480.1	16727.4	25444.3	19859	7425.06	15637.1	31713.3	19792	19773	15864.2	14927	17343.1	16869.9	6379.8	17175.1	21098.6	21181.1	17309.5	14432.7	16140.4	9314.6	24307.4	19949.1	9915.28	16976	18246	27872.5	27560	9871.87	8715.26	19079.2	18877.2	15555.8	34348.3	25239.7	19358.2	19955	26717.5	12078.3
NEG	M78T49	77.9704	49.0625	6605.32	8205.66	4490.92	6391.23	4769.19	7371.08	7421.04	854.702	5263.77	6010.71	8619.77	8208.26	7162.96	6795.65	8608.72	4747.61	8531.05	672.189	7282.81	9454.14	1684.73	7540.39	6694.65	7311.97	631.298	5336.3	7519.87	921.978	8026.34	6799.13	2074.96	4805.07	3671.06	9671.94	7571.68	9700.07	4346.06	6734.67	1883.51	807.187	4626.35	7185.68	6430.23	2702.28	7075.19	8773.29
NEG	M78T109	78.0437	108.635	7369.7	126593	8654.62	516.51	5540.9	5323.24	6369.68	8235.53	8003.49	7669	7681.93	5276.9	6633.45	9840.46	9398	9925.83	7560.69	6134.73	6697.68	9167.21	3688.43	7888.03	7079.71	6624.93	5586.4	7522.12	6147.97	10075.7	8084.74	7640.75	543.813	5169.96	754.005	7733.28	7502.65	7405.39	6165.11	8223.71	1224.17	6747.09	10076.8	6356.26	7565.26	11578.3	8278.09	8163.49
NEG	M79T56_1	78.6838	55.577	83084	26351.9	28108.7	74328.4	63527.3	45434	51024.6	47292.4	44657.9	16173.7	43096.6	57296.7	29560.4	46699.3	52550.6	46356.1	50372.5	35539.2	17610.9	36700.7	22449.7	29087	33626.6	40638.2	34194.6	21507.9	25199.2	52098.1	49995.1	42036.8	27609.4	10965.4	32018.6	60065.1	45531.9	33376.1	60579.8	27957.6	46437.1	40073.4	32494.8	52917.4	35636.1	46224.2	47644.1	56674.5
NEG	M79T56_2	78.9202	55.565	4.92899e+07	2.03342e+07	4.11123e+07	4.46616e+07	3.63555e+07	2.5e+07	3.93878e+07	2.9476e+07	3.10824e+07	9.9963e+06	1.98191e+07	2.9033e+07	2.69263e+07	3.41678e+07	2.45699e+07	3.32664e+07	2.5844e+07	2.60768e+07	1.41972e+07	1.7303e+07	1.41488e+07	1.52566e+07	1.68451e+07	1.95893e+07	2.00794e+07	1.451e+07	1.61569e+07	2.28019e+07	2.30342e+07	2.27834e+07	1.62776e+07	2.99209e+07	1.71113e+07	2.37105e+07	2.86524e+07	3.38162e+07	3.72133e+07	1.85011e+07	2.93738e+07	2.07475e+07	1.793e+07	2.89305e+07	2.52655e+07	2.1869e+07	3.21142e+07	2.42805e+07
NEG	M79T23	78.9224	22.6585	41198.4	11035.1	51098.3	10644.9	7219.02	11137.3	10757.7	10020.6	9381.63	82751.6	49314.9	45572.2	9820.48	8081.15	15665.9	13462.1	5062.23	7570.5	6723.69	78243	15777.6	11702.9	14612.8	7703.64	10833.4	13068.7	12568.3	11668.1	11433	8685.01	10163.6	9631.35	12141.2	11511.8	12499.4	14898.6	7751.22	12813.9	16182.7	12544.9	67186.9	75572.4	10606.3	9090.69	8610.42	14583.2
NEG	M79T712	78.9197	711.938	49515.3	45275.5	53014.4	46115.4	40829.8	37770.4	51418.5	83439.5	17802.4	37071.5	27145.9	41816.2	43664.3	112819	52956	51906	40366.2	38866.2	35957.4	26485.9	54583.8	45158.2	52563.4	27652.5	19711.9	41366.7	43126.8	47966.5	32425.9	55418.4	27205.9	38598.8	52292	26552	21466.2	102519	38437.9	24698.7	54451.8	40595.3	51130	38002	43249.6	30066.5	26864.1	24606.8
NEG	M79T482	78.9602	482.335	970817	555930	859348	938791	886141	715919	1.01831e+06	882277	1.11866e+06	625440	959598	962329	1.02719e+06	1.08673e+06	1.27122e+06	1.00447e+06	687670	680321	708861	781873	717334	586663	1.03345e+06	1.21211e+06	776622	681603	957260	1.25552e+06	1.02219e+06	1.16327e+06	656809	778240	390744	901008	1.10963e+06	1.47993e+06	734799	883149	820673	955732	971708	756139	1.04351e+06	905372	838284	1.11368e+06
NEG	M79T369	78.9597	369.333	4241.7	4795.87	5797.63	5850.01	6121.15	4570.19	6461.9	5491.09	6795.58	3318.66	9726.93	9892.89	7484.39	11179.2	14955.5	11497.6	6700.68	5958.81	5881.81	6743.36	8600.87	6727.93	11943.4	7812.28	6850.41	3850.67	4844.49	6789.69	9365.48	8403.69	9211.37	5009.35	5585.16	6535.11	10015.7	10729	3910.87	9700.85	7324.24	5092.47	7821.07	6472.28	8410.64	7861.32	8342.5	7008.43
NEG	M79T287_1	78.9599	287.467	6790.15	4167.02	6588.84	5432.83	4263.92	3755.15	6065.24	4642.33	9422.05	4634.17	2904.09	2548.63	2807.63	2911.86	4796.82	2318.04	1854.06	2435.09	2699.8	7320.08	1969.82	2597.05	2209.39	2812.82	3262.87	2120.12	2039.37	2569.07	3592.9	4038.73	2720.97	2459.84	2877.43	2601.61	2969.17	2865.07	2372.98	2934.97	2504.16	2330.75	2247.75	5428.71	3285.9	2482.75	2495.97	2908.29
NEG	M79T16	78.9677	16.444	7638.04	11487.5	10170.9	8035.17	11685.1	11952.8	3673.86	12593.5	9684.66	12543.2	11123.9	9688.12	8874.17	10181.8	10381.3	11242.1	10872.3	5649.98	9250.21	5833.64	4002.43	9040.25	7268.05	9640.39	8639.06	5354.11	11415.4	9454.21	9991.76	11038.7	16391.1	9829.17	11551.6	5521.12	5522.38	7605.15	10311.9	10443.2	9952.31	10122.6	10399.5	8312.52	11081	4989.42	9091.58	11090.9
NEG	M79T3	78.9677	3.294	10254.4	7965.88	9247.62	11257.8	7366.02	8022.16	5661.96	4937.59	9021.81	6655.96	9103.42	9118.84	7096.91	9606.33	8167.67	8115.18	8446.31	5447.87	9382.57	12434.9	3886.78	8249.16	6537.23	10454	10825.9	2774.67	7981.56	7890.26	9294.55	10748.5	10541.9	8327.79	8847.18	8024.84	4308.93	5944.27	8560.58	7184.14	8999.69	7335.94	11070.6	10796.2	9623.26	12770.9	8558.37	9208.44
NEG	M79T287_2	78.9858	286.788	4772.26	3844.34	5267.47	4325.35	3586.44	3684.75	4499.92	3126.69	7081.82	3918.84	512.005	695.249	1548.96	1026.22	496.318	1232.43	908.605	1169.03	1372.05	530.941	609.296	1488.51	522.378	681.839	1220.74	1219.54	1324.41	1534.43	2131.38	284.469	518.205	1370.73	1206.98	756.595	551.315	742.541	1102.35	682.704	1365.07	499.843	326.808	468.721	697.864	420.382	643.147	1013.56
NEG	M79T54	79.4095	53.692	16143.3	11241.9	9019	24390.3	17589.8	6307.01	8089.92	14732.8	6985.73	7025.36	11089.6	4925.77	5187.64	9098.56	9975.79	9631.93	11787.9	13705.1	5921.34	5560.81	4893.55	8756.67	2110.66	5550.16	7198.32	1897.26	2877.22	13232	14647.6	14682.2	6058.9	12326.4	6539.17	2586.68	10024.5	13135.7	16831.6	11178.4	6597.99	12297.8	9016.51	9142.33	7469.76	9937.88	9783.78	9618.44
NEG	M79T56_3	79.4734	55.522	16912.7	3102	5374.19	9167.31	2256.91	4808.47	10528.3	12680.7	11428.4	537.89	5239.58	6991.24	2946.64	5889.07	5301.4	6464.2	10792.7	6630.01	3068.71	3513.96	3675.82	3812.14	4617.38	1737.76	7591.79	2636.1	3814.86	6803.29	5439.79	8630.61	4634.87	5707.42	5116.44	2115.25	10645.4	5556.43	4932.34	5914.99	3144.64	6994.17	1956.66	4109.1	6331.33	4612.5	2876.45	2730.88
NEG	M80T55	79.5204	55.253	16122.6	2782.16	6342.88	8478.93	13443.2	7854.5	2479.83	12328.6	7667.41	1683.16	6884.61	1643.35	11647.9	3660.26	4535.41	10718.6	9357.76	3461.52	1542.95	3199.22	3674.97	2686.57	5987.57	2491.45	7433.65	1008.63	1848.72	6956.19	4098.76	4247.9	1993.51	3918.77	5605.34	6144.19	10323.8	11535.9	7556.58	1981.01	3864.63	7304.53	6162.58	5247.56	8927.82	1823.65	6979.16	5606.75
NEG	M80T56	79.5649	56.132	4950.31	2008.52	10634.3	2896.89	5626.8	2274.66	9444.21	7472.96	8467.15	1893.21	2058.91	2959.4	3768.38	5599.86	4396.27	8047.48	5817.58	6126.39	1392.55	3487.17	2000.03	3165.54	1312.4	1230.92	5021.24	2744.13	3412.61	1630.63	4044.21	5246.8	3338.92	2049	1579.47	6419.06	8004.15	8381.73	8437.93	1363.73	3565.04	4299.28	4167.6	4248.07	4565.36	2693.74	8473.58	5811.4
NEG	M80T281_1	79.7181	280.952	320.456	610.005	347.28	380.087	357.126	364.021	328.874	468.067	326.457	362.77	500.913	476.698	633.814	700.065	516.893	708.37	431.704	409.975	425.924	498.127	344.345	658.878	641.403	500.58	594.543	412.275	428.681	608.042	823.285	677.128	350.657	379.671	363.477	599.008	676.423	1066.16	567.795	528.041	480.999	513.747	480.061	557.761	590.69	442.757	680.287	541.898
NEG	M80T10	79.957	9.843	10430.6	11818.9	7803.14	9458.93	10149	8244.54	5290.8	23296.1	27689.8	8392.82	7978.61	10537	10358.8	8574.11	9863.21	8435.61	9948.9	8639.12	8830.32	8669.81	4587.29	15137.4	9321.48	8933.65	9886.37	8944.28	9982.28	5365.7	9941.13	9619.43	6113.03	8924.4	12298.1	12326.2	6240.99	4251.31	8950.06	8169.86	5364.02	10392.8	1457.76	9656.98	8008.97	15730.9	5426.18	7661.35
NEG	M80T39	79.9582	38.6945	220955	95350.2	210126	184626	151401	157159	257187	173975	199143	138588	191295	134946	191875	185078	176580	150700	188309	159571	135553	143314	85652.1	167951	179443	250820	166666	139495	166708	172635	268026	237340	181784	139034	114665	218084	199794	179090	197310	196983	158325	105107	222575	131618	127300	164797	250100	153953
NEG	M80T120	79.9583	120.062	115453	158129	85029.2	74718	105277	73632.2	130533	123503	199870	67401.2	113821	102389	128893	114025	129836	96852.9	114218	99302.7	89550.9	134875	88165.3	109123	137170	143213	96868.6	86109.1	95727.9	93937.8	127577	168402	91539.9	99984.3	95656.2	142205	138724	117621	133829	115547	102887	99449.5	100607	94412.7	109847	183638	117468	91461.1
NEG	M80T680	79.9581	679.56	18598	16175.7	13030.4	14712.4	15326.1	12316.4	11594	16499.1	14339.1	13702.6	13646	14828.7	23010.5	13157.1	13443.6	23955.5	14668.6	13643.6	9484.43	13668.7	14933.2	16370.8	13932.3	12050	14285.4	12595.7	15422.2	11900.7	17977.9	13421.6	12874.7	15000.2	12778.7	15661.1	11483.4	14310.5	12253	12551.6	9869.66	13192.6	10634.1	15373.2	11601.5	11604.5	10603.5	16313
NEG	M80T281_2	79.9585	280.997	81637.2	153955	94383.9	115038	121010	97659.3	100652	121232	124712	87962.4	170162	150623	210133	254236	193345	216853	176610	139011	146142	171791	204176	162454	266139	186470	165679	140007	179825	193078	256106	212098	176524	134724	92877.4	197476	212271	253895	182956	201595	171410	162700	182513	156871	253064	174481	183774	173584
NEG	M80T406	79.9584	406.48	79451.5	79353.8	86094.2	108923	107893	78821.6	94063.9	91816.3	84486.1	76536.1	110491	84835.6	93829.6	105926	99851.6	94383.9	82464	100095	78110.7	86964.6	108827	80043.5	86465.3	115588	90387.6	69207.3	99897.8	95939	87584.1	83424.1	95804.4	72937.1	93734.4	92339.2	95551.9	92977.8	72800.2	107048	102337	85429.2	88472.6	77029	87895.9	96187.4	105693	99428.1
NEG	M80T192	79.9582	192.303	34715.3	35830.6	28574.4	24809	32427.1	24654.2	34043	38321.5	37374.9	21904.6	29628.4	30220	44635.1	44129.2	51188.6	36153.9	34715.3	31932	25224.7	44430.1	42247.9	20586.4	30232.1	41660.8	22390.2	26375.3	29886.1	32022.9	33694.5	43852.6	32253.7	28868.1	30323.6	49270.7	59326.4	41195.3	37091.7	33628.8	32774.5	31887.5	37912.3	35276.1	39428.8	50128.2	32827.5	35612.3
NEG	M80T76	79.9584	76.0745	883385	274050	491575	446410	403716	243240	481021	316116	282308	198906	223851	377964	325122	621055	349294	288676	443599	252054	231986	342469	116568	300279	318116	165641	299149	179219	261350	299921	599356	274356	311526	313815	180353	299024	652134	371029	178293	299038	250195	257852	584054	309124	273507	339879	168629	306596
NEG	M80T704	79.9577	703.956	21963.5	16594.2	11507.3	20797.9	18009	10936.4	10412.1	14434.4	17911.6	10255	13315.3	13425.8	12945.1	5215.12	9089.17	11264.2	13193.1	26286.3	10891.4	11318.1	11370.9	14325.8	11644.7	10298.8	12396.2	11371.7	17200.2	10118.8	13157.6	13455	12188.7	10951.5	10085.9	13959.1	10434.4	12001.6	10767.5	10537.2	11062.5	13397.6	17908.7	11030.4	42482.2	6608.76	11789.3	13140
NEG	M80T23	79.9618	22.978	940727	690193	1.24552e+06	791254	759479	559117	1.26706e+06	852388	926023	1.39787e+06	831998	515850	446328	1.27206e+06	555359	460567	847147	963322	852426	447055	690599	623718	598568	1.37167e+06	984003	523726	515286	1.43792e+06	1.2168e+06	1.28553e+06	782744	540457	630249	1.11223e+06	532735	473524	872872	817798	848880	628072	696416	694855	1.04834e+06	933593	1.31939e+06	681401
NEG	M80T345	80.0123	344.677	841.11	802.59	1191.46	777.521	1144.89	762.923	771.454	289.149	307.371	377.324	348.93	894.848	1246.42	926.719	3300.6	1459.23	1524.93	1202.45	1062.74	223.198	1199.54	879.384	278.758	1717.76	1081.77	236.618	260.701	218.27	1732.12	1418.47	1336.69	692.343	556.979	1061.5	1294.11	1750.16	807.593	251.672	393.665	348.495	1264.38	1029.15	1761.61	1966.27	1667.87	920.043
NEG	M81T56_1	80.6755	55.517	88321.7	40674.8	77364.9	79392.1	68391.6	47527	72072.9	49080.2	47982.5	16700.2	35068.3	34520.1	55584.7	78185.2	49359.2	45219.8	55233.1	52290.7	22621.8	24157.9	23370.8	28644.4	32583.3	22154.2	32847.1	24298.2	24913.6	46978.9	35601.7	40645.3	29370.7	53102.9	25620.2	55065.8	44177.6	58462.8	22291.5	28368.9	52171.2	34830.1	34826.4	43470	47482	37589.7	62479.8	52667.2
NEG	M81T56_2	80.9182	55.598	4.65351e+07	2.01852e+07	4.69581e+07	4.29173e+07	3.82024e+07	2.34029e+07	4.28761e+07	2.99968e+07	3.60237e+07	1.02658e+07	2.0372e+07	2.60517e+07	2.71353e+07	3.65591e+07	2.95371e+07	3.58439e+07	2.60286e+07	2.66721e+07	1.39199e+07	1.68563e+07	1.35791e+07	1.44603e+07	1.85481e+07	1.9077e+07	2.15599e+07	1.63168e+07	1.682e+07	2.28078e+07	2.547e+07	2.20722e+07	1.6822e+07	2.91708e+07	1.86678e+07	2.38411e+07	3.16999e+07	3.339e+07	3.64839e+07	1.73893e+07	3.43892e+07	1.96226e+07	2.05654e+07	2.63811e+07	3.09423e+07	2.39771e+07	3.51748e+07	2.63612e+07
NEG	M81T22	80.918	21.853	15674.5	5280.63	6115.12	6470.9	4379.86	2830.57	3809.61	6293.56	1815.33	3793.3	5325.06	4914.81	22201.5	5803.42	7541.12	32654.1	4111.21	8590.19	17569.2	28353.4	6086.61	5053.54	7020.61	23226	5042.79	3994.34	4397.9	4578.42	6420.81	32687	28445.4	4139.17	5071.13	4476.12	10092.9	26909.1	6852.69	4931.47	7717.98	26486.9	5051.44	48828.7	4799.13	3316.66	3294.09	7439.33
NEG	M81T407	80.9575	406.633	396.779	449.226	592.199	825.654	589.208	549.493	565.151	588.351	558.254	518.561	810.177	657.127	513.915	934.164	735.284	546.341	499.16	595.217	516	526.31	692.714	485.345	494.08	707.431	746.225	391.012	483.508	661.394	672.491	733.019	566.932	428	476.04	632.581	586.296	533.143	392.147	589.525	515.003	651.867	505.22	548.719	610.294	610.893	869.469	735.092
NEG	M81T25	80.9694	25.472	187951	122896	207099	113693	55060.1	70531.7	241962	120598	138968	246677	118194	77042.9	63396.9	228438	34882.1	54621.7	92405.6	121800	146731	58228.4	41990.7	74851.3	84285.7	111778	188345	89134.7	34884.8	207792	224515	173960	109983	85934.8	114144	199344	69962.8	41111.7	140641	123707	152952	11657.1	82208.6	102655	199001	112942	255365	93275.6
NEG	M81T282	80.9657	282.488	2518.4	6687.99	2800.27	5892.39	3342.5	2746.01	2939.03	3004.37	2586.02	2101.01	3951.85	3596.84	5077.26	5325.72	4601.57	5065.08	3973.51	3142.44	5629.55	4394.09	5371.85	3059.83	4826.89	6894.64	870.767	3117.17	3944.67	888.329	5291.92	3604.89	927.771	4935.1	2498.28	3941.35	8513.27	7602.91	3573.26	4275.12	3628.57	5083	3732.7	3654.47	7772.04	6547.59	6259.48	2796.66
NEG	M81T89	80.9657	89.268	18148.7	41873.7	77749	65205.1	44317.4	39922.6	109139	68844.8	112787	40816.5	29273.9	70556	138038	125004	83233.7	25654.8	68344.6	85352.2	43555.9	58142.9	42307.4	46686.2	80970.9	56107.8	75231.8	51340.2	27703	23824.4	60190.9	27097.9	31842.8	45826	42608	67445.6	63860.8	63291.4	32771.7	35317.3	49959.2	44684.2	49994.4	78424.8	64260.3	105473	46822.7	44890.9
NEG	M81T42	80.9658	42.2025	19249.1	24498.9	16978.2	41388.5	11386.3	14194.1	14713.4	14943.7	23785.2	16452	50604	34912.7	24837.2	41460.7	22241.5	24115	11921.3	15629.2	8899.17	28935.6	5979.07	14954.6	34745.6	48613.7	25113.5	13645	12326.6	26458.1	34621.3	17358	14373.1	21857	32777.5	22126.4	44504.6	22278.4	21376.2	50683.1	30685.6	24314.3	23493.3	27949.9	25042.8	23995.9	27441.2	22616.3
NEG	M81T343	80.9648	342.508	352.412	511.909	629.899	372.761	737.339	468.69	537.599	582.643	556.22	354.515	711.873	586.423	604.805	526.854	1263.74	541.333	1092.1	760.526	707.053	835.375	586.503	414.086	773.562	914.083	625.387	598.782	717.765	427.414	494.822	441.233	1232.77	608.29	334.714	503.722	640.208	903.151	624.786	756.372	548.907	653.377	583.977	656.465	871.969	740.174	787.499	503.455
NEG	M81T103	81.0353	102.858	2886.95	3986.9	6221.51	41858.6	8210.03	13780.7	18480.2	8025.08	7731.32	11549.9	28217.6	5918.52	2838.8	73040.4	4556.63	12829.5	13102.9	10883.5	9563.14	6389.07	8193.1	3876.16	2651.51	20004	14440.4	7490.32	8613.25	12895.8	42421	5017.94	25705.9	5828.74	10078.6	6209.25	3630.34	13975.1	1898.87	20477.5	5154.47	6539.69	2786.98	6919.78	4343.93	8795.33	34055.4	10189.6
NEG	M81T360	81.0465	359.513	1559.35	2062.62	1694.18	1764.6	1412.63	1619.19	1781.61	1358.79	1426.85	1250.22	1421.89	1695.28	1797.88	1701.92	1487.37	2195.21	1521.19	1542.85	1704.4	1507.97	1800.72	1320.82	1952.69	1630.46	1767.55	1353.25	1451.17	1003.07	2089.13	2096.48	1467.7	1603.7	2242.4	1452.35	1801.16	1334.52	1332.75	1555.15	1851.76	1841.35	2768.87	1498.31	1858.72	2075.75	1604.66	1903.49
NEG	M81T52	81.4144	52.416	14812.8	10751	29133.3	9827.57	22380.4	11407.7	10875.3	22200.1	10386.4	6705.1	10502.9	14801.8	12792	11113.7	8263.02	12029.9	12555.7	5193.75	6222.58	2723.85	5097.6	4788.36	9203.24	4263.61	12292.2	7171.23	8193.74	4107.56	14708.1	9985.47	4778.09	14134.2	8004.29	4261.4	12005.4	18191.8	15302.9	8816.38	17187.1	5233.71	9044.04	15374.4	15257	11247.3	17868.9	12556.3
NEG	M81T55	81.4787	55.436	13722.7	4619.93	23649.6	6849.57	8948.45	7032.05	20604.6	4867.52	17937	1306.2	6558.39	8515.06	16417.1	19466	8239.26	6048.65	3799.4	8524.29	3129.11	6192.19	6350.59	6019.38	6898.6	4878.93	6565.23	4859.86	1960.14	10854.1	3190.7	9005.62	7413.33	4493.5	7733.49	6222.71	6256.79	3666.26	6166.56	8361.34	13979.7	5814.63	6202.04	5619.26	6147.64	7339.5	16761.8	7530.49
NEG	M82T55_1	81.5255	55.081	10235	1901.49	8643.87	17076.4	5808.54	3479.17	7253.47	5006.55	12469.1	1799.96	2389.64	10585.2	11472.5	13279.9	9631.88	7488.21	10537.2	4178.08	4876.36	1325.33	4048.31	6634.53	3539.92	5893.59	4202.76	1120.36	1541.57	7456.4	8084.7	3047.98	1571.15	9507.68	1196.55	1495.27	2587.88	1642.01	2680.81	1460.1	3052.19	3077.92	2560.35	8660.64	9650.94	1681.49	11365.3	8865.82
NEG	M82T55_2	81.5475	54.852	3756.28	11971	4627.83	8485.63	2058.47	15373.2	15716	15864.6	1581.99	6304.06	10026.1	2668.95	1916.2	16319.5	9132.5	12723	5599.79	37257.5	17100.8	15392.9	1528.77	32116.1	3434.69	12223.9	9709.57	14467.7	6233.21	9597.82	10474.7	7825.96	7042.69	12774.6	5710.2	1561.19	12375	13368.5	10349.7	7705.09	1667.7	7955.73	7288.42	6269.85	3577.28	1463.85	10415.9	9526.08
NEG	M82T55_3	81.5707	54.8905	4875.22	4288.13	5611.28	2527.94	7569.92	2640.49	4377.05	3977.1	4871.57	1641.53	4090.84	2753.81	2240.14	3396.31	5188.78	4658.45	5590.46	5553.18	819.877	3268.4	2242.7	3158.37	3707.46	1640.56	3970.64	1912.76	2238.99	1910.56	2473.61	1093.25	3128.06	5636.6	1310.6	5550.05	3053.66	3217.99	3027.61	1622.54	6009.51	952.826	3679.79	5977.49	5913	1812.19	2910.1	3675.34
NEG	M82T281_1	81.9539	281.056	3451.65	6453.48	4000.47	4437.68	5245.69	3576.48	3985.26	4937.41	4752.8	3383.81	5798.94	5469.24	7240.38	10154.2	6948.45	9483.17	6606.22	5368.07	5076.35	6596.6	7706.89	6603.27	10021.3	7159.6	6428.02	5299.17	6532.02	7509.59	10145.4	8964.57	6740.1	5007.58	3508.2	7207.11	8119.99	9875.4	6560.54	6803.04	7474.18	5901.74	6411.76	6349.24	9698.81	6913.54	6510.14	6045.29
NEG	M82T407	81.9538	406.549	3422.75	3704.52	3486.34	4639.96	4468.41	2700.09	3463.5	3373.06	3140.84	2670.55	4841.32	2794.33	3205.05	3958.8	3718.85	3642.65	3294.43	3532.37	2909.19	3175.92	4130.97	3273.94	3508.54	4666.82	3777.46	2736.88	3657.95	4185.27	3089.46	3003.45	3928.77	3071.64	3677.15	3468.99	3618.81	3196.91	2862.2	4339.8	3843.78	3127.16	3457.63	3209.77	3511.22	3627.99	4060.36	3614.3
NEG	M82T23	81.9574	22.978	34138.6	26417.6	46990.4	31855.4	22293.4	19465.8	40671.6	29910.7	35258.1	59836.4	32388.6	24241.5	14322.7	54954.5	19585.3	15807.8	29746.4	38768.3	34783.5	15782.3	26698.7	19237.6	20419.5	41423.4	34491	20458.6	17806.6	57599	40614.8	47335.9	37651.8	23837.2	26865.8	41751.2	15143.8	19899.6	28410.7	21698.7	39131	23041.2	22536.4	25382.5	40524.8	40712.6	50429.6	25430.6
NEG	M82T281_2	82.0305	280.897	5106.17	8983.07	5164.12	4961.16	5679.36	4649.02	6673.65	5480.35	5339.69	6393.45	9810.54	8506.68	5814.27	10084.6	6657.59	5555.96	9281.95	5664.82	4589.22	10004.1	10997	8917.86	3985.36	6855.74	10045.2	3082.69	9744.3	5140.8	14156.5	12894.9	3616.78	4250.73	9767.26	11077.1	6673.83	7358.59	9758.97	10643.3	4630.73	8416.33	5404.59	5957.65	5604.4	10978.7	5183.3	4648.09
NEG	M82T358	82.0287	358.435	492.139	704.378	681.734	1177.8	791.251	606.931	554.314	684.375	741.208	920.749	705.694	909.648	707.926	413.745	708.837	815.806	926.551	479.878	806.101	787.428	777.008	684.171	763.199	636.223	858.523	1020.97	800.857	677.366	894.491	1016.49	961.769	702.878	1360.89	834.845	930.948	1033.63	547.364	992.201	806.448	854.737	713.049	914.408	796.888	800.532	1031.81	668.314
NEG	M83T30	82.9585	29.812	10361.1	17900.9	5782.93	23207.2	26396	12194.1	55500.4	17255	5674.22	42825.1	17805	29589.6	8005.74	18853.6	8543.57	557204	15898.8	37781.2	15250.9	46362.7	26044.8	88349	25614.7	36877.1	19686.3	10708.9	64258.4	13603.1	34230	19830.9	28419.8	60986.6	15506.7	3272.84	8799.33	18858.5	29057.9	36752.9	30469.9	49282.1	22834.9	34963.5	10851.3	46136.4	16599	11231.7
NEG	M83T73	82.9613	73.3335	5250.71	7728.83	9188.71	10432.8	2281.01	9209.27	9731.95	6668.95	6909.51	14242.9	5708.61	9176.14	3904.88	12983.8	6186.55	6780.78	11702.2	1348.51	5342.95	8125.35	10422.5	6410.34	7974.2	7300.32	9129.94	12063.4	12155.1	9730.74	5542.67	9427.79	6965.75	10501	11184.1	10582.8	13455.1	10851.6	11841.7	8714.73	11195	7315.14	14171.6	8904.46	8283.82	7687.47	11827.2	9658.89
NEG	M83T359	82.9757	358.731	8412.05	8282.58	8916.81	7947.21	5138.06	9010.06	8998.73	8384.99	5196.32	7004.14	7281.71	9286.84	8737.5	9370.85	8348.29	8836.25	9662.89	5287.86	5963.23	6141.87	6959.01	8147.18	7883.74	7631.83	4659.96	7604.94	6661.53	6658.02	6682.7	5608.2	6700.33	7588.35	5450.72	5744.42	4962.52	9481.25	9941.38	8277.41	5844.6	6282.62	4915.89	10095.4	6791.51	6218.57	7793.7	8045.07
NEG	M83T344	82.9758	344.214	3265.78	3058.35	3089.92	2797.99	2227.06	3155.56	2759.64	3006.66	2698.43	2168.75	2916.55	2487.26	3202.76	3114.93	2958.88	2708.28	3135.48	2192.36	2400.28	2932.62	3072.19	3112.3	2606.87	3299.5	3080.96	2607.52	3124.36	2909.81	2690.44	3018.14	2815.23	2241.98	3033	3155.98	2469.08	3203.78	2584.47	2894.21	2684.28	2718.18	3232.12	2487.61	3056.26	2803.9	2710	2549.57
NEG	M83T103	83.0144	103.032	17413.9	31983.6	42010.1	232523	48982.3	78447.6	93026.4	58206.1	48114.3	62426.9	146679	40372.9	20413.9	422727	29204.5	86261.7	77582.2	55713.8	46115.5	37311.3	69690.3	26008.6	22380.6	121976	78487.3	47242	28159.4	72068.5	24967.5	37202.6	145086	37752.8	65489	44969.3	44980.8	90055	17660.3	26066	41516.7	42618	22676.1	35288.2	24140.8	56483.7	174767	56966.4
NEG	M83T294	83.0147	294.381	4058.04	4348.85	6907.97	5525.62	7384.81	7017.14	4761.06	7398.89	11700.7	7789.38	11055.4	6847.97	5569.75	8556.12	11284.5	9068.2	8891.16	7772.43	5845.43	6293.35	9899	5640.53	5486.75	10476.1	10616.2	6172.41	6473.65	5475.79	3367.89	5083.72	7578.33	8143.38	6771.91	6748.68	8855.28	5710.98	7016.39	5386.71	6605.91	4728.88	10467.1	9189.8	8451.61	3372.86	7421.47	11056.2
NEG	M83T80	83.0145	80.1925	7967.85	9040.48	8945.02	10591.5	8064.02	9518.21	11067.7	12298.7	9273.1	8343.67	10155.2	7866.73	6625.52	13813.4	12851.9	9737.8	11839.5	7206.8	5686.58	10836.4	10613.6	10223.7	8452.76	8641.11	11026	19640.5	11954.3	9196.78	8150.72	10368.2	8759.61	8680.82	10196.3	9211.78	12085.8	12263.1	10673.8	5841.61	10512.6	10270.3	7943.39	9603.05	6865.48	9080.27	8886.78	8348.26
NEG	M83T46	83.0157	45.625	15042.4	9452.52	6449.85	23782.5	6385.82	11018.3	10240.7	17637.9	15602.7	10096.7	9381.58	14905.8	12577.3	73287.1	1040.16	12682.9	8462.89	4430.06	6767.89	7800.93	25831.2	6135.7	6858.98	23797	9182.08	10083.9	1496.63	3804.19	1667.57	5093.66	5546.53	7206.67	9868.74	32586.1	26615	18527.1	12578.3	9008.71	10958.9	3640.21	19099.1	11246.3	19687.2	22223.6	27492.6	18720
NEG	M83T63	83.0512	63.282	1669.61	1673.61	873.477	1758.07	1609.31	2206.42	3425.36	2072.4	225.355	2004.42	9219.59	2727.65	1504.77	1317.54	805.448	387.309	2054.69	58384.5	2505.83	2390.19	1427.79	2359.85	378.154	2554.21	2103.49	1914.17	1590.72	2893.27	350.619	94.729	690.222	1470.41	394.741	1907.02	1625.57	1601.27	1586.15	1.38495e+06	234.082	408.619	378.957	1581.75	257.628	500.53	279.121	1669.7
NEG	M83T88	83.0509	88.37	1531.04	1412.14	462.408	2069.99	2175.88	1872.02	2216.64	1922.14	130.696	1608.85	7338.53	1426.16	1444.2	347.233	214.932	659.216	1906.95	28154.2	1974.67	1618.71	948.261	1281.55	59.1038	1535.17	1855.79	1654.17	1664.93	1919.62	229.686	560.125	180.603	1863.71	654.151	2007.79	1546.43	1218.27	1465.15	689309	621.145	1349.47	352.101	1134.32	152.774	298.862	651.195	1093.01
NEG	M83T299	83.0619	298.699	1088.88	456.516	477.483	851.951	218.349	455.478	760.408	416.257	1022.25	576.507	409.65	678.081	547.463	619.831	416.291	329.627	305.503	252.676	418.718	336.681	444.562	338.479	496.035	904.451	681.356	534.022	118.011	406.443	428.378	139.506	156.214	388.896	478.705	1206.03	1153.95	374.383	560.979	539.405	550.172	333.34	803.919	824.861	901.489	1585.78	935.114	1034.49
NEG	M84T104	84.016	103.921	5996.41	7852.61	8285	9770.88	1436.81	4207.12	2253.5	5774.99	8906.49	6961.61	5278.1	7852.89	8500.5	21873.1	5526.53	2499.47	5787.47	6592.67	1044.64	17478.8	1607.19	6081.02	6624.97	15483.6	3132.6	1000.26	5614	1997.73	6843.18	8268.46	3685.42	3749.82	2299.4	17887.9	6525.07	7158.26	7754.01	10785.2	6659.16	1061.81	9123.05	12445.2	556.802	12054.4	7269.14	2183.74
NEG	M84T284	84.0461	284.467	964.51	429.145	2517.55	1256.84	695.581	1037.57	1335.94	1314.96	944.205	860.068	1517.56	2015.31	1449.56	1279.52	1463.66	1401.95	798.544	1371.85	608.264	1490.42	730.655	1153.83	1372.23	1889.41	762.019	913.983	1389.99	1649.19	2234.88	858.316	1335.18	1570.83	1076.32	1947.52	1683.58	1564.33	1053.68	1337.78	1653.53	1174.77	1706.36	1866.77	1804.08	2091.67	1108.93	1143.77
NEG	M84T64	84.0543	64.306	0	0	0	0	0	0	0	0	0	55.6738	0	0	0	0	0	0	0	1408.82	63.5905	0	0	28.4618	0	0	0	0	0	0	0	0	25.421	30.1729	0	0	49.3426	0	0	87410.1	0	0	0	0	0	42.1261	0	0
NEG	M84T247	84.0824	247.244	539.887	692.316	1113.51	746.846	473.987	509.522	603.862	770.523	471.96	601.935	695.36	696.729	942.958	601.583	463.511	1572.34	550.968	492.625	693.989	498.701	660.08	488.148	977.916	555.17	913.76	491.515	436.5	626.421	909.063	620.715	829.241	690.441	790.394	656.554	564.03	660.923	863.555	610.008	811.874	671.877	841.937	576.01	1005.1	683.769	822.997	636.166
NEG	M85T30	84.9558	29.903	9464.43	5829.75	12737.3	7740.37	9563.38	4076.73	19266.8	10402.4	1613.06	14324.6	4865.57	22367.7	2529.97	5107.88	2096.46	160433	7645.89	14399.3	4560.34	14141.2	7118.8	30834.2	6946.06	10524.3	6647.99	3502.02	21622.2	3168.39	10614.4	7356.82	6397.77	22220.8	5647.31	15079.3	10679.6	6241.79	7274.88	10783.3	9019.64	14635.6	7549.08	14887.5	3118.67	13939.4	14576.8	2904.94
NEG	M85T694	85.0051	693.877	12499.7	17341.9	5627.91	2775.83	5382.65	7028.66	2678.13	22620.7	4501.49	5842.09	10175.5	8331.71	10860	8572.56	12198.8	4635.92	6811.02	988.38	5263.3	15303.4	11648.6	16907.2	5374.94	8906.78	13000.6	4704.12	5521.58	10135.8	4213.03	5314.13	6428.11	4660.19	8803.99	17401.9	9880.04	9313.51	4339.99	11894.5	5145.38	5964.17	10699.3	5209.83	5355.72	4897.33	6683.09	7523.75
NEG	M85T417	85.0307	417.263	73739	35361.1	82952.8	89754.8	80534.3	79239.3	84048.9	85228.4	99707.8	58484.9	97326.3	76421.3	71105.8	88574.8	111336	105950	85656.2	59762.8	68696.9	78702.6	78934.1	71468.4	96365.9	119464	104526	52910.8	84984.1	110382	93985.8	117504	96107.7	64826.7	34277	99800.9	99120	106261	75658.3	85510.7	73763.5	71303	76964	69873.3	110216	98930.1	95364.8	70164.9
NEG	M85T295	85.0304	294.616	60509.8	79925	73919.6	61247.1	48510.2	75946.6	41771.5	57343.4	97461.6	75774.5	50074.3	59353.5	59544.8	57666.5	80287.1	43631.4	82400.4	78170.5	75698.2	82171	54855.4	41727.2	76755.2	50616.3	85660.6	70184.1	86832.9	80491.6	72924.8	88038.9	47307.8	49067.9	57145.4	46244.3	51062	54060.5	50706.4	45769.9	110087	47356.5	75856.5	39594	85370	58507.9	86799.8	44714.9
NEG	M85T135	85.0304	135.349	113653	160101	28804.2	196484	61484.2	74218.1	68158.6	144545	62516.3	149386	79378.2	139342	183998	128702	120899	95748.9	208393	109823	110539	85362.8	104597	304474	97439	100656	92827.4	96900.8	47143.4	106374	93624.4	95731.5	175719	157445	128397	71102	287328	125704	108157	101265	91901	76755.5	104681	63202.7	236866	122227	236526	106882
NEG	M85T440	85.0304	440.372	25836.4	8051.7	19291.8	24602.9	20023.3	21957.8	23871	17410.7	23489.9	15893.9	29517.9	25149	26979.1	29988.9	32360.7	30381.6	22651.8	18535.2	19765	25053.1	21262.1	17267	30777.8	39017.6	31117.2	22889.5	24488	26366.7	31849.2	34176.1	22623.6	25557.8	7235.06	22921.1	26943	30752.2	25533.8	26650.5	23856.8	27654.5	19681.3	20141.2	30457.4	25268.2	28990.5	25336
NEG	M85T45	85.03	44.843	20203.7	19167.6	36053.6	59721.9	29222.4	19100.7	17803	36428	19209.9	15294	79028.7	20854.9	22195.5	24833.3	21889	33018.7	24596.5	18356.5	25382	33891.7	15875.3	31878	32205.9	31090.9	27165.4	23403.8	22733.7	42351.4	34409.4	34258.9	34953.6	20978.9	42052	20525.7	51086.9	27719.8	21553	22166.3	51613.3	68170.9	32807.3	18837.8	22590.4	24956.7	26950.7	16102.5
NEG	M85T64	85.0304	63.925	20499.9	27170.1	29915.6	39981.2	31186.8	23569.7	25041.3	24910.3	23965.7	24550.6	68577.7	21324.9	31843.8	28205.4	34025	29616.9	23790.6	20810.1	42818.1	27931.3	26132.9	21640.3	41893.5	49832.9	38918	30303.6	23172.6	47356.2	41555	36787	27604.8	29723.8	32159.6	19891.1	48642	33532.3	18809.7	28654.5	23133.8	37261.6	36725.3	17730.5	34346.1	25782.7	31473.6	71489.7
NEG	M85T104	85.0302	104.19	48468.4	40573.4	120660	65033	40619.7	40392.9	41281.5	59951.2	85403.8	47087.6	46339.8	35569.5	46038.8	57585.5	59895.6	51500.5	52157.9	61074.7	53836.1	97099.6	98053.9	59611.9	66007.4	117835	58633.7	112875	34597.2	131855	121380	70979.2	64898	41261.5	157326	49360.2	63759.4	59792.9	51812.8	87096.9	76296	43738.2	66247.7	36379.2	58597.2	68105.3	58333	116092
NEG	M85T29	85.0339	29.383	14144.6	2401.16	12350.8	13711.6	15389.1	4793.09	8759.4	6135.63	7489.03	8762.77	14487.4	33212.9	7798.31	5174.4	6579.83	1673.93	11889.9	25531.5	8860	23910	18142.8	1342.83	12398.5	7731.77	5424.81	5515.41	34480.7	13777.2	19933.4	11935.1	9895.19	34839.7	10898.8	11482.8	16050.6	11338.5	9342.16	6925.81	16849.8	24434	6784.78	23772.5	7849.93	13106	15006.6	8437.22
NEG	M85T123	85.0668	122.871	13958.4	6871.85	25946.6	11799.9	17107.8	9190.4	16116.2	7206.01	12149.3	15385	12310.4	12005.5	13967.6	17985.2	10392.6	71790.6	7141.44	14013.6	11710.3	7342.74	10803.3	5798.25	12383.8	12015.9	8848.8	7816.96	5672.74	22336.2	7058.37	9593.28	13592.3	10065.2	11191.3	11524.6	11042.2	36500.4	9466.21	14413.4	15451.2	8218.73	24698.2	6057.42	18379.4	15381.5	15281.2	10722.2
NEG	M86T417	86.0336	417.312	3272.35	1234.93	4296.31	4416.72	3402.43	3506.95	3659.29	4009.74	4381.55	2970.4	3905.67	3489.02	3258.24	4028.52	4814.2	4360.32	3482.67	2853.8	3184.07	3489.67	3697.22	3467.27	4093.61	5321.38	5210.63	2286.97	3704.99	5371.81	4340.86	5117.09	4391.73	2937.9	1705.2	4321.89	4358.41	5327.8	3334.7	3830.76	3200.61	3260.76	3274.35	3120.24	5079.39	4120.69	4183.7	3365.3
NEG	M86T294	86.0336	294.265	2509.8	1716.66	1833.46	3787.31	2219.72	1550.94	2042.01	1695.17	2095.94	2704.04	3698.29	1727.46	3716.72	2409.12	2963.51	1558.89	2157.57	2388.82	4364.46	2865.35	3106.25	1722.13	2750.74	3319.76	3224.97	2222.63	2671.02	2711.12	3058.64	4007	1394.44	3053.02	4659.77	1438.21	3882.44	2249.82	3626.25	1506.25	2054.44	1574.54	2474.32	2008.84	2588.7	3569.77	3786.08	2628.67
NEG	M87T123	87.0101	123.183	1.11397e+06	609421	921225	1.98476e+06	2.52702e+06	1.72601e+06	1.03041e+06	987201	724846	1.4429e+06	1.14664e+06	1.13974e+06	1.23516e+06	2.08271e+06	1.43848e+06	2.47001e+06	1.20899e+06	2.14856e+06	2.2049e+06	1.42485e+06	566696	1.1065e+06	917868	1.78032e+06	2.25586e+06	1.53182e+06	968878	2.38913e+06	1.55394e+06	1.60238e+06	1.91124e+06	1.13661e+06	1.56094e+06	1.11549e+06	1.11192e+06	2.37125e+06	1.4329e+06	1.33407e+06	1.9529e+06	1.71788e+06	2.00271e+06	997758	1.11415e+06	1.35572e+06	640919	1.42264e+06
NEG	M87T292	87.0095	291.736	44051.1	37048.3	81055.7	58334.6	90630.6	51099.1	82879.3	66228.7	101475	52411.7	48497.3	45470.8	65699.3	83482.3	122546	72873.3	62430.6	77895.2	50617.4	74290	98588.9	41360.2	72190.5	63641.8	67476.1	64232.7	71979.6	59168.5	74531.5	94410.6	48530.6	42188.5	49840.9	65587.6	95497.9	82195.2	59901.4	76649.8	67420.3	68978.5	112169	45571.6	58553.4	73017.6	44840.4	60671.6
NEG	M87T41	87.0097	41.025	1.6601e+06	133203	1.02514e+06	1.3721e+06	98223.2	638525	1.12503e+06	744511	1.00406e+06	900191	449694	695307	793069	1.4629e+06	76145.2	427026	189590	185698	367859	332038	364666	249643	273571	1.89627e+06	720166	688670	18351	276274	611470	28593.7	5719.76	382072	429427	2.9428e+06	1.53321e+06	312816	1.01235e+06	814044	373958	343701	1.57142e+06	1.1243e+06	1.35276e+06	1.94175e+06	1.28717e+06	1.59631e+06
NEG	M87T137	87.0101	136.961	823338	392422	571411	1.2816e+06	1.55994e+06	733824	545320	583455	435932	748986	912897	900148	1.09169e+06	1.24544e+06	792189	1.35914e+06	644872	843030	1.57774e+06	1.04527e+06	1.62184e+06	665933	532799	1.02023e+06	1.46974e+06	814796	795170	1.32777e+06	850284	963825	1.08287e+06	619974	915816	765985	648491	1.43045e+06	969382	807504	1.07039e+06	926330	787174	730407	708807	570529	441004	532885
NEG	M87T224	87.0093	223.737	21907.5	25249.8	21894.2	25853.9	30240.4	19481.8	19400.9	19132.6	18676.5	16646.4	17980.1	19616.5	24567.5	26378.7	54287.7	27564.6	15321.1	16865.9	23745.8	20042.3	34937.3	13485.3	17527.7	29510.8	24621.8	18767.2	16366.8	26076	25754.9	15333.7	17184.8	19845.4	20403.4	21505.5	23168.1	24623.2	20441	18145.3	20430.5	25049.8	28807.8	19037.1	24800.2	23248.3	19106.4	17943
NEG	M87T441	87.0094	440.789	26301.5	8496.35	24872	31763.2	24183.5	27828.9	30279	20892.9	30048.8	18910	30528.1	31646.1	31219	34739.6	37641.4	28312.8	21390.8	23639.3	24405.5	28803.4	25367.3	19529.4	34216.9	43377.6	32185.7	23523.3	28302	45939.9	33579.8	39799.8	23531.1	28558.1	8139.66	28837.8	37161.5	38621.1	32975.9	31648.4	26702.5	33716.6	29033.1	22923	28248.7	28631.3	32178	30786.6
NEG	M87T65	87.0096	64.623	289089	64591.6	203272	230693	57869.9	188929	236481	189747	239069	360008	155927	148725	206075	291291	60117.5	91278.7	74418.2	72365.5	149360	127783	157230	98533.3	110984	711561	214717	304862	47777.6	106620	169598	103548	50156.9	115006	134556	778954	389143	71763.7	202117	304522	99369.3	109338	560782	297051	393642	535914	334658	447760
NEG	M87T102	87.0093	102.385	174153	93805.5	154613	166483	85159.8	114706	144757	131997	189138	143372	121064	108991	125064	174618	116790	118583	114108	112436	128589	114672	200066	121501	126029	199382	118553	156199	81478.2	128886	127325	140018	114176	102289	154554	200074	176859	135298	171647	133171	151629	92234.7	221267	155024	175491	225304	186530	178446
NEG	M87T244	87.0207	243.672	2178.41	2733.67	1654.44	4011.62	1488.56	1850.59	3367.19	3280.08	6183.52	2245.88	2933.65	3402.78	2835	3159.53	6692.53	5038.4	3511.16	1749.35	1837.46	3286.78	3251.46	2192.34	4487.77	3098.43	2795.11	1650.23	2155.6	3113.77	4326.12	2785.24	3236.97	3198.42	3324.57	2159.23	4283.01	4652.97	2744.29	5740.99	5287.53	4138.75	7545	2838.36	4888.57	2103.02	2853.27	4716.19
NEG	M87T219	87.0459	219.107	3501.5	3042.11	6582.64	3732.03	5835.31	3919.43	3977.58	3256.31	9343	4054.8	5076.49	3949.14	2951.13	16091.7	14031.9	3186.66	5275.04	3944.48	7991.18	4524.2	5159.74	3452.87	3608.87	4918.4	4269.78	3817.89	6160.99	3394.87	5324.64	7542.31	7096.44	4704.82	3742.87	10527	13591.3	4098.51	3559.86	4342.83	4999.23	3994.07	4052.47	4206.48	3937.16	5554.34	4119.31	3158.07
NEG	M87T77	87.0459	76.911	23349.6	34576.1	24131.1	63494.4	56226.7	29870.3	45417.1	104164	125617	22559.1	40593	28506.7	100304	87048.7	42668.8	89234.5	28251.1	28714.9	40956.8	70997.3	68677.5	26950.3	69899.3	21708.8	45144.4	26608.9	29095.4	53095.1	32818.6	62177.5	46878.5	22449	83710.2	283838	181603	45559	142901	23740.9	40430.4	35412.9	27523.5	17174.2	27832	190507	150561	173719
NEG	M87T61	87.0459	60.609	119770	30648.5	79911.5	111006	25143.8	95433.3	110293	16215.1	12242.1	16836.7	28261.9	16065.3	20179.1	134336	29550.2	43778.6	21685.7	16738.1	73842.5	30838.8	20203.8	18554.5	34844.8	20728.1	33257.2	23478.5	24613.3	43980.4	25766.8	55630.3	17242.8	12779.5	32211.7	3804.48	10882.6	26408.2	94558.7	17133.4	44334.4	53493.6	23047.4	151785	18430.1	246445	128926	189678
NEG	M87T313	87.046	313.415	6461.73	7465.46	17014.2	6466.47	23320.2	6491.02	10111.7	7651.54	9129.87	10797.6	13804	5736.78	5469.17	11515.7	9500.82	16260	11908.6	5166.08	5311.71	6562.22	21129.3	8973.75	13041.9	6288.05	13705.2	12590.8	7250.47	14834.1	7123.15	8795.93	10765	11927.9	8994.41	5980.83	8606.26	16331.9	8205.55	13057	9588.53	5342.76	19760.9	5840.73	14528.7	17907.8	11421.8	9403.81
NEG	M87T32	87.0458	32.0715	1752.35	5258.36	16889	21713.9	1813.17	13310.9	20398.7	21317.1	16481.5	17784.6	16896.5	14466.5	22950.7	18458.9	3148.52	4204.51	4821.92	4979.41	6632.57	9595.18	17529.7	4866.97	11219.9	31518.9	16653.8	16342.1	582.77	5303.17	13616	2569.62	1295.65	5643.28	9585.26	28466.3	18642	8413.86	13694.7	20611.8	4683.49	7630.29	16873.7	20977.6	19444.8	17910.7	26837.4	22080.3
NEG	M87T692	87.0459	691.754	3239.4	2138.19	3750.29	1756.84	2059.75	3579.07	2648.25	3182.32	3209.3	3988.41	2685.58	2631.46	2131.08	2514.94	2727.66	2450.61	2529	3007.59	2404.99	2361.29	2797.42	2318.2	2511.76	2365.52	2704.37	3680.31	2536.14	4813.48	2281.75	2820.9	2665.82	1860.5	3327.91	1941.38	2195.32	2070.04	2114.13	2418.08	2747.7	2655.4	2372.22	1688.76	3267.99	3639.53	3199.71	2220.31
NEG	M87T716	87.046	715.737	2727.02	2676.07	1034.11	3369.31	862.3	6749.84	3332.25	2320.02	3814.49	4694.41	3348.29	2915.78	2478.5	4670.26	3880.37	1432.66	2534.42	3377.59	2401.43	3091.45	3637.87	2430.26	4008.98	3398.58	2781.86	2384.81	2502.75	3718.65	3573.78	3743.95	3595.74	2587.29	3642.4	3721.63	3395.02	3509.41	2380.3	3157.77	3481.27	2433.95	3541.26	1263.39	3832.93	3795.78	3711.13	3062.48
NEG	M88T329_1	87.7764	329.064	595.652	605.882	387.402	394.58	594.673	415.528	536.463	539.395	452.599	573.247	435.112	463.977	498.7	604.393	550.144	543.885	564.126	485.149	366.009	443.821	548.407	463.347	541.863	490.839	645.138	449.179	507.111	524.867	539.743	504.919	482.492	374.031	736.819	406.108	495.614	767.405	515.018	599.846	655.159	430.515	608.235	587.922	622.376	572.261	458.546	540.255
NEG	M88T186	87.9733	185.582	2899.42	2939.8	2870.73	2134.79	3856.58	3158.74	3121.77	3491.76	2568.43	3127.68	2841.29	3383.39	4253.44	2711.1	3570.22	1738.8	2488.39	2910.15	2481.12	2746.35	2578.58	2670.49	2432.57	2586.92	1759.5	2887.15	3035.66	2973.06	3646.8	2782.56	1943.22	3368.2	2338.49	3119.64	842.813	3447.18	3250.84	3256.3	2952.77	2200.98	3084.49	2578.11	3817.33	2870.8	3128.34	3324.71
NEG	M88T124	88.013	123.586	34792.1	16457.1	29427.2	94404.1	70805.9	60293.3	30846	30967.4	21420.7	40174.6	41405.1	35361.7	34563.3	63027.8	47317.3	77718.2	39279.8	62881.1	47907.6	35276.8	55419.2	33681.9	34123.4	85744.1	71033.9	34740	31209.5	65550.9	74128.7	48331.7	59796.1	36465.7	46558.4	30889	39313.6	69413.1	37411.2	59576.8	89317.7	48130.3	58293.2	32460.3	42121.6	40760.4	23608.2	44530.4
NEG	M88T293	88.0125	292.812	2122.07	2112.94	2225.81	2669.54	2274.31	2629.48	2075.28	2453.39	2061.41	2057.41	2404.91	2597.06	1263.29	3288.1	4337.32	3893.03	2640.07	2579.66	2311.36	2563.89	2048.11	836.244	1423.51	2799.6	1683.86	2369.72	2479.46	1784.71	1196.44	3430.99	2114.39	2439.77	2311.6	2317.94	2453.87	3549.63	2467.67	2656.75	2505.74	2445.82	3108.1	2637.47	2542.43	1841.15	2876.18	2509.38
NEG	M88T41	88.0127	41.01	47938	41963.4	26169.3	41393.7	1042.17	19314.7	29088.7	16394.5	18475.2	29428.7	10318.1	9763.95	19724.5	24833.5	970.348	10824.3	1867.36	2554.44	8927.41	7604.66	10157.3	4276.74	3854.79	66068.8	18199.8	20092.2	37.971	5421.91	19388	328.179	477.86	6845.95	10709.9	83768.5	48769.7	6932.33	31171.7	20973.1	7743.47	7191.82	49866.3	36988.9	32571.4	59428	41003.8	49720
NEG	M88T329_2	88.0419	329.15	115960	159962	126376	152791	187313	109988	105800	117667	118151	108937	146882	162261	208625	242959	165161	241404	128445	113916	140076	124771	124995	90899	140229	139687	162748	80578.5	114852	123733	156739	110654	140112	145917	221240	98684.1	156185	217875	110469	155244	152820	106355	193388	130074	170858	182321	127355	138719
NEG	M88T246	88.0411	245.509	16958.3	11715.2	16405.8	16499.7	15204.9	24147.6	18847.3	15634.8	16691.8	15836	17875.2	17284.3	21128.9	25137.6	17733.9	16724.6	13986.5	19744.9	13962.6	14685.3	16549.4	11977.1	16708.3	19527.3	20604.7	12313.1	12184.4	15973.4	23505.5	18348.5	14595.7	15885.2	16320.4	19063.8	19062.4	17407.9	15273.3	20755.7	16298.8	13332.6	22129.8	16799.2	22442.8	43807.3	34331.2	18101.2
NEG	M88T202	88.0411	202.259	5618.47	1830.19	4658.99	5531.94	1734.53	3576.24	4430.94	1901.79	3312.43	2657.83	3804.17	4706.75	6458.23	7385.37	1442.27	3773.13	1977.03	2133.49	3267.72	2510.69	5028.05	1511.85	3654.08	6539.19	3854.91	2557.64	987.918	2461.56	3490.37	879.859	569.874	3565.91	2544.51	6638.6	6513.79	3353.87	4727.91	5422.76	2502.09	1914.51	6737.01	4754.57	6705.42	8695.86	4762.89	7152.63
NEG	M88T382	88.0409	382.037	7926	9225.44	12359.6	13090.6	10412.3	9460.75	11412.3	9825.28	12703.7	8054.04	7111.33	9698.95	8668.18	14069.1	11428.2	18082.6	8851.22	9003.79	5937.4	8142.66	7794.96	6359.06	12870.6	5901.82	11239.1	5405.04	6249.47	8490.26	8383.66	8655.47	7772.96	9728.27	10958.4	12386.1	12749.2	12799.5	9563.16	9493.93	10622.3	5549.41	8572.74	8115.9	14001.5	6715.62	10571.5	9354.81
NEG	M89T224_1	88.7581	223.726	7914.74	11727.4	8020.78	11285.9	15511.8	6541.96	7464.61	6234.16	8106.76	5680.1	6632.08	7245.51	10689.5	11493.5	6441.85	12619.3	6826.1	7602.14	8247.05	9648.94	17468	5195.29	6942.13	14154.4	9673.98	5670.94	5990.13	9595.98	10832.7	6210.68	8535.82	7026.73	9007.69	6906.08	8079.29	9194.08	7324.88	5788.19	8274.76	10699.4	12287.7	5571.88	9419.01	10247.3	7845.25	6301.64
NEG	M89T390	88.9889	389.864	15581.9	8828.51	13202.8	13500.2	14312.6	10006.1	15309.2	14630.6	26788.1	9438.47	10604.1	11320.8	16221.6	14320.6	26486.3	15576.5	12954.6	13130.5	7663.82	9175.96	11617.5	10910	16981.3	10445.7	11303.2	9972.77	12599.5	12193.4	13956.6	16483.9	8256.78	10624.4	9511.18	15809.4	25968.7	19463.9	10971.9	15316	11212	11183.5	18987.9	12804.6	16409.5	11856.4	14196	15211.7
NEG	M89T408	88.9885	408.272	9766.76	8461.44	9862.88	7851.51	9490.47	7637.19	10192.2	9878.31	16811.2	7442.19	7751.28	9253.79	9142.34	9649.54	14903.9	10906.1	9069.68	9427.31	6354.71	7263.46	9282.08	8248.38	11206.7	8902.46	8486.4	7904.25	8876.44	8537.82	10036.2	12035.1	7198.63	7258.25	7048.92	10151	13854.2	12023.4	6929.7	10372.3	8217.29	7073.98	11316.7	8272.95	11388.9	8325.64	8864.26	11623.8
NEG	M89T259	89.0253	258.998	71489.5	96252.1	74723.3	98957	124271	71585.1	66243.9	71488.2	64188	61244	66201.4	78988.7	106144	118563	86431.2	119192	56106.8	71362.3	89693.7	77566.6	113453	41657.9	57010.9	107289	86317.5	70857.8	62653.9	91294.9	87403.4	52953.5	59523.1	74612.6	70644.2	61795.1	91748.3	86684.3	74449.1	59301.2	71745.2	100498	103796	68538	82936.3	70495.8	67605.4	62268.6
NEG	M89T80	89.025	80.189	28322.8	64850.1	34061	52931.7	27235	26536.6	34062	54473.1	43359.4	53810.3	30973.9	29308.5	46011.3	45894.9	73215.4	44642.2	37216.6	53777.5	23777.9	36293	53124.4	37235.4	49945.1	32985.1	37121.1	40376.5	38441.7	32030.6	48644.9	87293.9	41660.2	27497.7	56889.8	34835.8	56319.4	49677.9	39909	46085.8	43426.6	37878.7	50704.4	32920.6	75512.7	41878.2	62859.8	44184.8
NEG	M89T113	89.0239	112.514	51227.3	5105.46	86123.9	53367.2	73805.3	9934.09	52132.5	64626.1	4506.53	11936.5	46265.4	51061.6	8502.06	63627.9	50507.9	76133.6	95349	7825.65	60499.5	90859.5	91537.4	71523.3	63745.2	59803.6	22286.8	76475.3	66201.2	63180.4	54943.7	8083.17	14157.1	64805.5	131210	54571.8	7363.25	55482.5	97286.5	55377.8	63197.4	9920.5	85215.6	38999.6	70900.2	7953.77	71259	58216.6
NEG	M89T16	89.024	15.858	15835.7	7846.51	35071.3	5631.33	7965.84	6841.78	15615	4444.66	33104.4	28221.4	8461.93	8787.92	15370.9	9959.09	14385.6	45902.4	7293.99	9536.41	25600.5	9500.78	6685.88	8681.19	8843.53	31050.8	7141.5	5692.38	8782.19	9625.39	10517.6	31334.9	10585.2	7105.72	29119.9	15865.5	16467.1	11255.7	4132.12	11620.4	10495.6	9661.64	6293.24	7777.35	17847.8	13666.2	10807.2	11736.3
NEG	M89T295	89.0257	294.848	508716	269925	604784	352304	259073	394837	303875	303926	290316	253469	590799	478346	371841	421241	359442	315181	482997	462278	557056	341896	523664	274619	666069	334410	382974	325164	282577	667558	325881	373151	604607	261545	365574	253799	438492	345084	282179	322281	372865	251568	360109	257796	328010	327811	319451	393039
NEG	M89T224_2	89.026	223.731	3.51939e+06	4.31528e+06	3.57462e+06	4.71909e+06	5.96049e+06	3.06818e+06	3.14085e+06	3.02258e+06	3.04591e+06	2.5028e+06	3.18304e+06	3.38402e+06	4.37482e+06	4.79538e+06	3.78442e+06	5.18473e+06	2.65808e+06	2.71548e+06	4.61606e+06	3.68775e+06	6.78944e+06	1.87073e+06	2.62736e+06	5.40132e+06	4.20767e+06	3.34148e+06	2.51156e+06	4.71959e+06	4.67905e+06	2.75612e+06	3.26563e+06	3.27365e+06	3.47604e+06	2.85664e+06	3.58776e+06	4.25005e+06	3.23335e+06	2.87937e+06	3.54039e+06	4.59711e+06	4.9081e+06	3.35225e+06	3.95398e+06	3.75021e+06	3.14903e+06	2.51097e+06
NEG	M89T329	89.0445	329.163	4081.93	5369.51	4154.1	4988.99	6615.17	3315.34	3609.82	3937.72	3564.36	3594.12	4778.05	5588.99	6688.56	6880.34	5567.46	7011.39	4390.83	3743.53	4419.33	3626.93	4074.18	3036.29	4601.5	4255.36	5139.43	2656.43	4173.24	3762.25	5067.03	3732.31	4740.31	5431.91	6448.33	3248.13	4908.27	6793.89	3382.6	4635.89	5044.79	3074.4	5892.6	4026.14	5239.63	6043.66	4045.4	4741.97
NEG	M90T223	89.6132	223.141	1380.31	1734.48	1433.09	1780.82	850.27	1181.46	637.7	688.872	617.58	964.634	1189.09	1233.08	1590.53	1164.35	1046.69	2117.53	488.641	591.255	1415.75	1131.27	1906.34	378.728	738.746	1553.05	999.154	697.352	915.953	1926.24	1403.42	1106.77	873.984	1230.49	1449.77	990.744	1519.39	1648.65	1111.52	717.968	1182.79	1817.88	1329.05	1043.33	1465.94	1238.91	1098.15	553.38
NEG	M90T186	89.9703	185.695	2147.57	689.26	1722.04	1586.25	2028.8	1388.07	1948.11	1666.73	1876.82	1212	1673.37	1723.62	2017.05	1493.85	2015.78	1831.68	1701.1	1745.71	1976.63	1528.67	625.689	1624.66	1188.95	2203.7	1815.59	1774.66	1872.43	1626.13	1732.28	1752.58	1785.45	2032.51	1624.25	1392.65	1772.27	1744.12	2346.68	1580.22	1609.46	1552.63	2193.82	1892.17	2225.9	1924.68	1586.8	1780.85
NEG	M90T22	90.0148	21.766	111907	20004.4	94524.5	75579	8016.19	66487.8	58752	48257	125973	55692.2	32563.5	38657.9	85200.3	72527.6	7468.79	33864.3	18216	14749.5	16595.3	29667	29888.3	25450.2	49630.7	106986	29578.4	53611.3	2590.89	16865.8	45017.1	1967.08	1832.57	29431.8	34215.3	117921	155257	26850.1	63867.1	68538.3	21690.4	20238.8	79807.3	106073	121986	120906	135386	130159
NEG	M90T224	90.0289	223.735	91328	102844	83413	112717	145806	82481	75735.1	81626.5	70488.2	63917.3	82453.9	82808.2	106499	119640	87815.1	131551	64819.8	63489.2	114307	87536.9	158081	43587.1	66784.2	131210	100299	83230.1	60802.9	126647	116047	65294.4	84671.9	85676.5	88066	70730.1	87802.2	106384	85781	69721.5	87886.4	113360	118805	81851.3	95483.7	85592.6	73165.8	61154.4
NEG	M90T295	90.0286	294.831	9398.23	20008.2	18139.8	17260.2	14575.5	13850.7	18776.1	10362.4	18720.3	13726.7	11022.9	10919.7	14218	13873.3	18608.2	15723.8	8442.51	8944.38	17312.4	10707.9	21342.2	13866.5	17904.1	16191.7	16543.3	15244.7	16829.3	11857	15550	15976.9	20398.2	19217.1	18477.4	10454.7	20310.4	20019.4	8575.98	14912.2	22062.1	9807.6	13721.6	13706.6	13111	18147	19339.4	18314.7
NEG	M90T329	90.0449	329.033	486.547	1068.13	750.175	820.162	737.209	382.773	624.379	669.818	503.606	528.122	610.794	619.8	792.64	814.57	835.232	876.267	435.328	607.93	615.409	558.608	471.26	571.177	541.216	708.109	714.543	508.28	597.01	662.414	827.104	599.29	701.088	653.935	889.598	507.429	681.186	733.669	561.913	651.486	904.43	577.136	803.25	616.54	671.746	673.235	720.398	686.88
NEG	M91T422	90.9718	421.793	1738.12	3440.76	2602.61	1852.89	972.669	1628.17	1847.69	1354.3	1810.84	2262.97	2106.94	1334.7	1738.97	1731.6	1423.59	1383.99	1000.49	1261.55	1856.55	1342	1769.45	2079.46	2356.22	1229.16	1167.03	1800.12	1267.42	1753.14	1651.53	1817.47	1679.54	1101.24	1194.81	1621.27	1635.72	1747.2	943.088	1472.69	1516.39	1133.43	1787.39	1139.56	1080.17	1663.93	1205	1384.8
NEG	M91T207	90.9867	206.547	1532.37	1167.2	842.664	966.494	2332.33	1143	1302.84	1162.31	1381.69	1758	1623.95	3149.71	1213.8	1791.48	749.226	1103.74	2808.96	473.009	1192.32	1026.07	3378.06	691.193	1230.91	1401.07	3046.73	927.03	4461.86	992.332	1237.95	1587.56	1096.01	2829.68	1150.98	1854.68	698.314	1448.16	2664.51	1127.02	1986.3	896.578	1762.17	838.3	1248.65	1377.97	1263.53	2644.51
NEG	M91T298	91.0045	297.63	27970.2	21590	32912.2	30716.9	24527.2	24016.3	32339.2	29100.2	30410.3	26364.8	26656.7	27296.8	27447.3	32222.5	29800	28071.2	28003.5	29955.9	28988.3	29186	34102.7	27973.6	30555.6	27189.8	29902.3	27864	25949.3	29988.4	31455.9	38968	36563.7	28633	27645.6	28153	32096.4	31727.3	29209.9	28199.8	41136.2	27626.5	31280.1	24190.6	30364.6	28518.2	28251.8	28388.4
NEG	M91T224	91.0294	223.74	17397.4	20663.6	16774.6	23448.3	27875.6	14668	14897.7	15863.2	13989.3	13177.1	16151.1	16474.6	22263.2	23045.5	17793.7	25890.2	12569.8	12950.5	21335.1	18565.4	33638.9	8656.14	12503.8	25260.4	20764.3	16462.9	12080.7	24023.7	22111	13034.3	16183.6	16560.6	17203.7	13677.9	16333.6	20950.7	15708.5	13335.6	16035.2	20861.8	24857	16014.6	18393	17660.5	15294.5	12657.6
NEG	M91T680	91.0285	680.265	404.917	331.76	293.062	324.304	323.011	524.964	283.183	294.554	290.513	395.75	327.016	344.051	261.565	338.091	168.069	288.883	369.579	459.966	174.527	341.52	269.122	619.009	194.735	251.592	514.978	388.469	129.824	293.448	367.166	448.783	359.348	178.439	186.583	599.659	333.07	476.789	428.775	368.248	335.166	382.794	329.017	436.221	364.611	304.598	332.858	394.152
NEG	M91T112	91.0407	111.908	17664.5	5805.26	14035.8	13120.5	12218.4	9383.59	15610.4	18548.5	12962.2	9467.07	19241	10046.3	9235.47	12176.7	13054.2	13548.4	17713.5	8694.34	16029.8	23069.5	5403.98	13974.2	22109.1	13021.9	9112.36	13786.1	16379.3	28940.3	14705	17295.4	10386.6	10539.8	12660.8	6950.1	10920	26029	9305.53	16978.8	16054.1	6637.26	13028.9	9559.47	10537.8	9932.43	5961.17	8693.86
NEG	M91T32	91.0314	31.965	15871.4	5092.86	14477	11451.2	2836.41	7187.52	16834.3	13514.4	20547	12482.4	9096.48	10778.8	8274.5	16556.9	3339.93	4901.97	4461.56	4664	3704.69	2570.91	542.729	5705.29	10541.7	13883.5	2116.75	10228.6	1620.1	5661.42	2627.99	2251.66	1498.08	3800.84	6752.89	22697.2	23536.7	1599.7	5712.27	11343.8	2435.92	5819.75	13823.6	14927.7	17458.5	27194.7	18631.9	17903
NEG	M91T120	91.056	119.518	50131.3	15426.6	65720	29718.4	23838.8	20370.3	26871.9	50745.1	27038.7	27274.4	40684.6	20175.4	20368.5	26800.7	23276.6	32648	27525.1	27453.8	11392.4	19650	18220.4	9401.98	32649.4	65216.5	26477.6	6033.56	16844.3	29203.7	39588.8	37605.6	49669.7	23873.4	46519.4	50348.7	20936.9	25844.2	31592.4	30434.8	11854.8	21503.1	13466.3	21863.5	67431.8	17295.3	39305.5	30828.3
NEG	M91T29	91.0601	29.244	3265.92	201.157	4307.25	14494.9	55.6696	1333.42	4564.5	1109.45	1955.11	5472.28	24268.6	1219.37	1536.06	1949.93	0	809.182	652.348	0	293.117	387.814	202.147	319.092	328.324	3857.94	1376.98	1319.74	0	101.872	1005.49	0	27279.1	1170	772.836	2272.02	3952.03	163.205	16474	1399.96	577.639	583.749	1790.53	3422.44	3021.98	3244.3	4228.29	4105.74
NEG	M92T17	91.9579	16.719	20303	19549.7	26596.6	17330.2	24766.4	19174.7	23001.6	22065.6	21583.2	16520.9	22166.2	17527.4	18758.6	21954.5	21750.8	21349.7	18919.9	11441.8	7545.03	22563.2	7086.36	20762.6	24585.2	23562.4	16728.2	16408.9	20936.6	21570.4	21939.7	11254.3	23952.7	19818.8	15299.7	23092.6	22415.9	3484.09	13426.9	21989.5	27556.9	19926.9	19993.9	43246.3	21379.6	26867.2	21600.4	21603.3
NEG	M92T162	92.0262	161.713	13434.3	120882	18532.9	19049.6	42813.3	15989.5	15672.6	38156.4	19236.3	21564.5	11586.9	11847.6	12001.2	25201.8	26669.1	31566.5	21877.2	11363.8	35392.3	31313.5	18031.6	22291.6	29369.3	19296.8	18346.5	19858.5	10541.1	43628	23938.1	33061.2	20056.8	13181.4	144057	25701.7	34009.7	33123.3	12544.8	21119.8	20942.1	24293.9	43765.5	16246.9	31331.8	24310.6	26160.1	16508.8
NEG	M92T72	92.0514	72.418	19056	82914.3	59120.8	17859.9	12848.6	25346.8	51397.4	35420.3	107761	38073.4	57144.2	16452.7	13424.1	67350	16117.3	11242.7	39636.3	48070	41741.8	10233.6	7401.73	7474.26	27862.8	72224.4	30150.8	11685.8	18378.2	36182	44454.6	64866	41988.9	18337.3	100702	20898.8	12208.9	12160.5	24502.2	17994.6	36680.1	20541.1	28862.4	8745.37	57102	24292	46399.1	17102.3
NEG	M92T93	92.0513	93.15	15435	57969.2	42712.4	12806	9792.64	16818.2	42603.4	26450.1	78704	27891.4	36829	15120.1	11002.9	50880.8	12844	8163.46	29445.7	33325.8	33357.8	6906.11	2163.8	6187.42	22659.5	52311.5	23499.2	7167.82	11094.8	27185.2	21484.9	44630	30564.5	15880.4	75565.1	15620.9	7539.78	8712.17	17315.9	14565.9	31178.3	13781.9	21102.2	5177.85	46751.2	15304	29758.9	12929.9
NEG	M93T155	92.9287	154.887	34269.7	32279.5	32581.7	34335.7	29507.8	28770.6	18838.6	35872.1	38104.9	30406.1	32594.6	31245.8	28269.9	31945.9	34616	31197.7	34828.8	32796.9	32914	33436.8	5868.8	36276.2	35023.9	32101.5	36948.7	31559.9	31176.7	36258.3	31454	39510.8	23711.3	23729.7	25495.7	38686.8	30294.3	31359.8	27868.2	29113.8	15404	36465.8	30135	27092.1	29250.9	21700.6	28843.6	30632.4
NEG	M93T194	92.9287	193.771	11524.7	20653.7	11112.8	12234.4	22223.8	9269.98	10295.5	12592.3	30677.9	10111.1	15897.3	13653	15810.7	31766.5	30612.8	11893.5	8337.71	10950	11791.5	14699.5	13912	15255.4	6178.6	11750.9	23114.2	8363.23	11002.4	15025.3	12356.5	13464.1	30204.6	10093.2	27754.5	10820.6	15878.2	15502.2	8849.52	11722.3	23812.5	22364.1	22019.7	19726.7	27380	11929.7	28922.5	13817.9
NEG	M93T22	93.0146	22.314	38393.5	9499.42	27812.1	429040	859618	19149.2	21318	20420.3	47195	9568.11	12206.3	16626.7	212241	16150.1	2059.75	232160	6770.17	7471.55	9162.14	8666.3	12048.7	168009	14908.8	2.70444e+06	10348.9	19296.1	265085	6285.55	18356.7	377560	155750	7525.57	13330.9	76227.9	417450	8474.06	22482.4	256715	8309.12	7383.24	968792	22627.5	35543.4	36741.2	132353	40351.8
NEG	M93T113	93.0353	112.65	49150.2	212016	15704.8	83634	96346.6	88261.4	67421.8	185813	777392	16709.6	45181	638143	251010	285588	181948	25575.3	150488	204897	16419.7	45738.5	205455	32624.4	33528.4	487754	263923	30079.4	388900	13342.9	118663	94180.1	67256.6	644135	69328.8	197866	156271	44189.5	187854	734760	32362.6	237811	304135	148106	120618	2.6238e+06	648932	110291
NEG	M93T665	93.0356	665.411	8066.04	5849.14	10743.5	4770.78	9712.26	5856.12	6772.61	5558.37	3955.17	6053.23	5734.55	3819.46	5607.21	5485.97	6697.96	6905.94	4472.06	5371.12	5166	6396.07	6398.43	5851.79	6221.69	6404.46	5736.4	5433.51	4519.61	6178.77	6575.06	7088.19	6822.61	5608.92	6268.63	4896.73	4486.82	5643.77	6362.37	5108.57	6691.73	3397	5237.32	8453.38	6523.09	7041.12	6522.82	4796.05
NEG	M93T282	93.0343	281.559	4675.54	4465.08	5826.86	5573.34	5719.98	5649.99	5606.6	4789.96	5066.57	4325.71	5247.02	4922.68	5690.3	5270.59	4187.91	6472.8	4453.47	4003.32	4351.28	4539.03	5991.36	3593.58	4954.08	5671.62	4534.87	4313.88	5389.5	4624.65	6450.19	4662.7	5921.01	4892.91	5862.1	4128.53	3844.71	6279.31	4852.45	4519.79	4432.07	4203.16	7446.68	4202.81	6504.74	5352.72	4424.01	5030.67
NEG	M93T128	93.0354	128.488	2139.72	68080.3	2017.5	39419.2	42313.1	47422.9	32704.9	87183.3	372444	12361	25434.9	324882	127791	126212	87605.4	12166.4	75615.6	101018	10592.4	25160	80988.2	17153	1129.64	212606	121589	15708.3	187542	11005.4	61507.7	41229.2	19106.4	302349	10275.7	110140	81642.5	21851.7	93296	352689	11678.7	109171	136865	84028.8	54712.1	787275	298066	60120.8
NEG	M93T24	93.04	23.758	280138	244930	466125	923501	1.92958e+06	822566	648126	290268	431244	1.70597e+06	287606	580362	448848	1.37731e+06	1.10603e+06	504110	1.95357e+06	301275	143819	400160	2.75162e+06	597214	479104	6.1314e+06	298146	396453	585524	1.24978e+06	196916	845345	334617	625313	217683	323412	932016	691706	337824	553379	274218	490174	2.1525e+06	1.65212e+06	654375	3.158e+06	244090	224590
NEG	M93T359	93.0465	359.39	15418.2	13994.4	18701	13782.1	16448.4	12607.9	12844.8	17825.3	16623.1	10014.3	16895.2	16276	16056.4	15952.9	15856.6	17236.5	14865.3	11414.5	18988.1	13437.2	15521.5	14538.4	14282.7	15248.5	13041.3	12227.6	12727.2	15116.6	14656.1	17340.1	14783.7	12430.9	20851.3	11431	17484.3	13632.4	14925.4	16687.3	15245.1	12383.7	19144.3	14606.5	16148.9	15752.7	19922.1	15043.3
NEG	M93T269	93.0466	269.345	1809.34	1108.05	1695.74	2889.87	1719.54	2290.02	2408.13	2366.8	2515.27	4590.21	3220.13	1633.52	2113.45	2422.26	1376.71	3233.92	2942.28	1466.03	1515.13	1897.61	1814.79	2446.92	1803.32	3081.4	2518.03	2265.22	2570.81	2179.02	2986.1	1580.61	2897.7	1872.65	2835.25	2646.66	7582.69	3533.49	3092.16	1146.06	1978.37	1518.57	4421.56	2578.74	3073.01	3058.18	2514.3	3022.77
NEG	M93T72	93.0542	72.45	1334.35	4735.72	4067.38	1169.11	600.007	995.596	2750.78	2136.22	6687.77	2238.24	2097.72	681.231	1672.93	4000.65	968.768	494.307	2138.83	2346.31	3127.47	707.305	62.4981	324.463	1819.12	4361.36	1800.46	969.119	1964.68	2075.69	2557.42	4670.23	1889.31	752.162	6216.7	863.103	854.246	847.496	1219.26	952.586	1838.77	798.603	1519.34	436.897	3070.48	563.359	2616.85	2680.3
NEG	M94T113	94.0387	112.859	3355.61	10900.1	1850.41	4420.41	4960.65	5281.23	3024.91	11976.4	43761.4	1444.34	3388.08	37522.4	15163.8	15739.8	10418.2	2042.8	9263.68	12092.8	1354.19	3339	13066.6	1803.09	2359.11	27357.7	14293.7	934.716	23724	1808.8	7042.39	5938.64	3058.4	39239.4	4077.87	11688	9067.05	2190.18	12277.3	39720	2155.04	14204	19476.8	8710.53	6160.26	130097	34526.4	5987.73
NEG	M94T128	94.0387	128.337	2164.74	3872.02	1983.35	2961.14	2521.14	2704.02	2302.14	5234.71	22686.8	1641.88	2556.2	20324.1	7541.18	7538.44	4907.48	2457.26	5013.16	5827.67	1655.75	2311.47	5404.52	1849.33	2040.5	11884	8877.09	1552.29	13008	1704.69	3484.99	2805.5	2280.32	17691.3	1555.2	7321.54	5021.02	2280.9	5217.28	20804.5	2057.43	5181.56	6635.38	4277.44	3710.67	42465.5	18319	3313.61
NEG	M94T24	94.0432	23.6105	17198.1	10959.1	32441.1	58520.9	91931	39984.5	36622.9	21308.1	26409.5	97099.5	25065.5	31618.2	29577.7	76592.1	61377.8	36628.3	99063.5	15999	5480.48	29255.6	148844	33717.5	24623.3	299487	10856.3	22098.2	36038.5	71446	10005.2	41863.1	20334.1	38975	12539.6	18792.9	49269.2	35322.4	135131	34024.8	14297.9	24914.7	124339	92457.3	39108.9	183607	10939	247986
NEG	M95T155	94.9258	155.489	26100.1	21090.7	24343.3	26464.4	21364	17195.4	10918.6	24416	22218.5	16965.2	20431.4	20845.6	20555.1	21669.8	27674.2	21808.2	21817.2	22154	24171	24175.3	4813.67	24695.8	23906.8	24776.8	21612	20393.4	25430	21772.1	23174.8	24633.3	13843.7	19886.4	16003.9	25444.3	23301.3	21630	20606.3	23143.1	10985	25472.1	21065.1	21466.5	20259	14887.4	22854.6	21617.6
NEG	M95T194	94.9256	193.557	7321.22	7233.61	11721.7	8102.71	7615.69	6950.57	5710.47	10679	7504.69	6337.68	9519.49	6766.49	12293.4	17525.5	7058.81	7951.76	8903.56	14368.1	6815.61	8105.37	8069.55	8288.71	14220.5	6286.33	7926.32	7051.97	11819.5	8705.36	13983.7	17286.6	15773.1	13793	9595.87	11762.2	6974.31	7169.46	11668.1	7590.92	6312.99	14497.5	9000.87	6841.72	13872.3	14726.4	14992.3	14675.5
NEG	M95T49	94.9813	48.9345	50833.4	70038.1	38697.2	47135.8	41590.4	52765.4	51627	61079.3	67630.5	73110.2	64859.6	58055.5	87878.8	77538.4	66201.8	49634.2	58430.7	58591.7	68196.1	81994.2	26367.9	81162.1	79055.5	77036.1	83769.5	57203	70067.8	75415.8	131113	77512.8	64615.3	51985.8	49752	73757	67115.6	66703.5	44382.9	101422	34643.8	73996.4	70389.3	60677.4	79344.8	63169.7	60428	80037.8
NEG	M95T20	94.9822	20.383	7373.65	6015.56	22168.3	26219	5156.65	11431.4	10843.9	3750.2	8220.33	7073.91	10216.3	9531.59	71312.5	9551.31	22884.3	32742.7	136111	5991	16734.9	9196.96	9075.22	24729.9	27727.8	23450.1	43497.3	9340.24	18334.9	8243.01	37289.6	8774.17	7735.85	3407.47	16847.6	19857.2	6609.1	19480.7	73621.6	28880.3	11461.1	4564.97	16619.2	4822.59	16065.2	11990.1	8294.04	26265.4
NEG	M95T124	94.9818	123.902	196347	454141	179655	609068	171160	385776	250205	532403	208951	403773	244177	168328	183993	177953	202374	167212	630668	162785	154685	205864	72996.5	192597	215879	230429	484108	158064	150772	174961	197993	188454	223894	173767	242619	167772	192197	172341	195851	438226	726581	165513	166136	380863	173717	321017	195053	401724
NEG	M95T294	95.0147	294.287	10401.2	16407.8	18533.5	13720.8	17197.7	15195.7	11066.5	16497.4	13598.6	12839.7	19462.9	16841.1	19960.2	15262.4	12460.3	16674.6	17873.5	17834.4	18654.2	18454.9	20318	12294.2	12213.2	22278.4	17248.4	10718.3	14438.3	13486.2	18981.3	20150.1	19879.1	17892.1	12331.6	14429	11898.3	12787.5	10426.9	19642.2	13103.3	19570.4	10884.1	10146.4	18944	12501.3	15829.6	21529.9
NEG	M95T29	95.0303	29.235	16415.6	22182	5959.82	30102.4	8258.63	9002.89	6473.66	6458.75	8442.69	11522.8	7687.35	12230.6	18063.7	36368.4	3275.28	12388.3	8425.96	7930.34	6864.36	11987.9	16713.8	14573.6	8482.93	5670.97	14717	9899.89	4686.8	7905.81	11458.2	4630.5	5890.14	12283.1	23783.7	7278.27	18991.8	10625.1	9318.39	13194.5	13188.5	14311.2	11744.4	13771	10059.4	13422.7	16373	11005.7
NEG	M95T268	95.0256	267.762	6897.61	6040.42	8038.33	5633.73	6880.1	6780.11	6306.7	4722.29	5728.97	4121.89	5888.57	6673.71	5542.63	4235.55	6003.17	4394.11	6026.79	5677.43	5869.35	6323.6	6066.32	6205.87	6447.96	6134.69	6382.21	6019.81	5807.08	6414.66	6756.51	6334.54	6789.47	3536.87	6402.99	4299.72	5914.5	5715.35	4076.28	6287.7	3153.1	6032.26	6046.41	6238.97	9111.78	6312.27	4440.94	6211.34
NEG	M96T189	95.935	189.438	509.291	841.246	678.527	997.102	1314.1	379.449	425.221	472.347	602.839	392.55	647.417	858.881	1067.78	2213.89	1618.62	1733.01	1125.67	976.353	629.021	998.826	732.264	1217.32	1722.44	937.409	619.325	453.408	853.614	636.515	966.448	628.161	840.413	1324.04	326.15	726.318	1581	1329.64	653.645	943.99	610.398	756.197	1043	1179.57	1194.73	666.087	1246.84	763.45
NEG	M96T34	95.9349	33.603	2332.95	1408.07	249.952	100.218	722.933	92.3844	8132.26	3711.45	2368.11	0	1007.21	0	4631.89	265.43	346.312	57.8124	91.0174	99.6461	108.179	1140.35	989.528	126.164	2302.84	138.002	83.9086	2312.85	0	238.597	655.152	2320.01	590.356	0	1024.47	1778.04	375.566	350.909	3311.12	471.94	1269.93	1398.99	378.993	156.59	450.531	2592.32	422.344	0
NEG	M96T406	95.9527	406.492	3244.15	3592.36	3640.67	4251.31	4346.74	3593.72	3643.96	4792.65	3544.18	3202.61	3999.58	3648.16	4394.57	5552.75	4408.31	4595.16	3515.98	3385.28	3518.43	3790.38	4289.39	3032.19	3507.41	4607.45	3822.35	2761.75	3488.56	4648.53	3797.7	3941.08	3400.65	3916.49	4151.94	4920.53	3988.94	4105.78	3240.71	5055.81	3838.32	4029.4	5089.04	3819.6	3881.64	4083.79	4054.17	4246.08
NEG	M96T21	95.9573	21.308	6166.76	5720.99	9196.09	4040.33	6931.75	5990.75	2057.76	4799.26	6113.74	7158.27	6569.05	2410.66	2809.51	6438.01	5010.75	3587.61	5154.94	3948.22	2732.8	24271.5	3120.6	3530.8	4704.88	7352.71	5365.12	2683.16	3101	6969.2	6534.1	5347.46	6609.62	2366.52	3224.72	3278.44	5774.97	4420.46	7720.46	8079.05	3519.02	4868.23	3756.85	3536.26	1538.1	9917.35	6501.39	2199.61
NEG	M96T332	95.9861	331.937	2312.53	1457.78	2250.34	2379.16	2213.95	2366.12	2259.85	1967.17	1879.5	2058.02	2625.68	1716.67	2473.34	2594.88	1583.18	2321.03	2292.93	2241.11	2401.11	2239.99	1872.93	2254.25	2502.31	2484.89	2911.63	2398.89	2298.24	2601.26	2414.34	1688.46	2351.23	2085.31	1392.35	1173.52	2325.41	2537.27	1518.62	2617.67	2365.01	1248.64	2258.79	2546.32	2431.1	1448.99	2453.51	2256.45
NEG	M96T696	95.9796	696.001	3507.83	2981.1	6682.67	5876.91	2783.61	2481.21	2304.36	3334.42	3790.34	2629.45	3107.04	742.513	3062.49	3792.76	3145.87	3309.37	2872.24	2144.52	2250.04	2971.74	5109.85	379.064	4316.81	3043.26	3740.5	2857.1	2215.21	2265.28	2514.76	2677.43	2747.56	2790.35	3678.59	2288.5	2605.25	4049.74	2349.43	354.724	3218.34	2740.22	2814.23	4303.3	2525.76	2940.34	3078.12	3416.25
NEG	M96T272	96.0214	272.398	37909	45947.2	49293.4	47774.5	44440	45034.6	47159	43147.8	52831.5	39236.7	47700.8	41978.4	46694.1	63874.1	44951.4	45894.6	42037.6	38770.1	42054.6	44028	42295.2	43392.3	44172.4	47766.9	48363.8	38744.7	45853	50246.5	44636.7	49456.2	42255.5	38072.6	54386.4	45926.5	39362.6	49859.1	34786.2	45452.8	45661.1	39201.1	45808.1	44096.7	45729.8	49113.6	57164.3	44129.4
NEG	M96T246	96.0211	245.934	9601.33	10006.3	9752.09	11810.4	10124.7	9626.06	10398.6	10754.8	11128.5	9621.04	10013.9	9622.04	15821.2	17811.7	10830.8	10472.3	8394.82	8398.82	8882.57	7431.87	8343.95	7719.09	11279.4	10641.4	10228.5	7928.29	9302.98	12670.6	10124.6	10562.9	6125.65	8796.21	11410.6	9082.64	7848.42	13812.2	7332.92	8372.39	10229.5	6509.07	9586.18	9235.4	10300.6	11114.3	10268.3	9213.08
NEG	M96T267	96.0328	266.738	2746.97	1543.57	757.748	607.839	482.43	2089	1127.42	442.678	560.17	1136.03	1634.83	455.978	1441.17	1597.9	1496.44	2760.01	992.534	685.685	1431.88	768.936	2141.42	1717.14	1330.58	2381.87	2399.6	1386.29	1334.68	2194.19	1570.06	2180.8	1994.61	1707.48	1885.96	1220.35	690.839	454.746	1155.37	832.342	1608.69	1357.39	2403.45	1521.46	645.224	1408.14	408.976	1578.03
NEG	M96T372	96.0458	371.811	372.117	409.624	733.648	556.928	770.828	474.22	663.447	840.709	1342.62	295.717	533.809	436.509	897.513	639.471	1479.19	625.721	699.774	683.716	345.621	485.217	452.606	360.845	517.384	510.569	479.002	279.37	566.99	505.048	652.387	471.879	667.549	1222.96	906.369	628.062	703.486	678.519	370.826	673.323	524.56	618.387	503.327	627.207	414.206	877.914	891.327	442.688
NEG	M96T317	96.0824	317.435	1155.85	710.705	5538.64	1169.89	2661.32	3821.37	2047.49	3330.16	2541.02	653.379	3075.02	2033.37	2264.43	553.826	2431.79	2405.99	1829.97	1313.83	2164.82	1700.95	1743.82	848.033	1631.99	2340.52	1191.32	1703.27	1648.68	2342.16	1511	2595.17	3377.21	2311.07	385.017	860.356	1314.52	2352.35	738.672	1426.67	2431.98	1355.32	2379.8	2045.27	3083.01	3320.16	1974.58	724.827
NEG	M97T407_1	96.6693	406.507	2993.43	2553.96	2535.21	3305.61	3106.97	1709.31	2806.13	2609.47	2568.02	2552.85	3547.94	2232.2	2528.11	2997.81	3027.1	3099.93	2342.8	2602.27	2308.23	2352.62	3202.93	2104.13	1923.62	3808.14	2558.84	2267.27	3062.68	1934.68	2666.1	2165.38	2700.47	2153.51	2965.44	2488.32	2697.95	2770.25	2279.21	3157.79	3074.22	2495.7	2415.83	2290.16	2330.76	2544.32	2803.73	2340.64
NEG	M97T156	96.9226	155.542	4366.89	4451.99	3679.08	4051.5	2690.56	2735.73	1776.16	3737.14	3869.19	2831.94	3635.59	3330.76	3527.65	3732.8	3945.38	3231.97	3789.48	3557.05	3731.37	4371.4	676.923	4260.68	3611.41	4500.97	4631.41	6067.32	3977.18	2007.32	3876.03	4401.8	2135.42	823.979	2964.5	4972.4	2928.75	4081.52	4051.42	3509.66	880.968	2114.59	2323.01	3768	3012	2593.93	3927.08	2554.46
NEG	M97T407_2	96.9616	406.555	986445	983165	1.00114e+06	1.31387e+06	1.22488e+06	1.00689e+06	1.06743e+06	1.12302e+06	1.02916e+06	932704	1.28163e+06	1.01236e+06	1.10217e+06	1.24448e+06	1.1808e+06	1.08815e+06	1.04839e+06	1.18568e+06	965936	1.00519e+06	1.25656e+06	951848	1.02372e+06	1.38287e+06	1.08676e+06	814420	1.17031e+06	1.11574e+06	1.01204e+06	1.00943e+06	1.14143e+06	931759	1.08919e+06	1.07399e+06	1.08084e+06	1.0837e+06	893897	1.29147e+06	1.17644e+06	1.00641e+06	1.05661e+06	971368	1.10559e+06	1.14496e+06	1.27154e+06	1.16128e+06
NEG	M97T38	96.9608	38.455	113333	383165	307327	291059	207194	374631	227184	273461	276000	176458	471384	315681	379762	350212	284999	295810	239327	234813	312675	254709	174650	336031	269188	283064	295550	63549.3	274461	249673	345453	296629	631114	183185	270286	371484	76011	329871	250407	383349	258039	303683	509415	195005	218570	459470	362315	281545
NEG	M97T702	96.9601	702.062	61887.2	77365.3	72393.1	73255.4	59012.7	53290.8	8080.08	111009	56542.7	71769.5	87319.7	85387.4	88518.5	93085.3	88943.2	9461.56	172941	61848.4	85410.7	38470.5	41017.9	8747.22	86762.6	58422	78286	9539.2	90681.1	57556.4	59638.4	53650.7	42221.9	86857.4	47630.8	56909	57867.8	64938.3	51995.8	55766.2	159315	60134.8	69951.9	65778.4	60355.4	47261.2	22253.2	56760.2
NEG	M97T672	96.961	671.911	43776.8	39266.2	33708.6	42930.5	48207.8	65592.8	36063.4	61279.3	63423.9	39921.3	33987.5	36699.8	45619.8	49259.6	66924	45124.8	82966.2	42361.9	41416.3	43232.7	45107.4	53381.9	55883.2	32963.4	32647.6	34148.8	34942.8	54184.4	39316.7	53172	39508.5	44252	50953.9	46752.9	37750.8	37478.7	33502.1	40141.2	52471.3	53165.5	40405.8	40791.6	42304.7	52693.2	10616	41263.6
NEG	M97T117	96.9608	117.437	207269	292190	110841	362010	195703	161495	122957	222687	194326	182698	91670.9	187112	208363	171345	182454	104336	189148	315995	164972	149451	101913	415965	171602	178270	183302	96791.7	200882	126155	187545	178639	162733	179773	159762	210309	131945	161349	161521	146537	163075	123110	153003	155391	94361.5	548607	173735	141458
NEG	M97T646	96.9607	646.473	42017.5	41013	64464.2	68406.6	58889.3	38899.3	32474.8	41646.6	36894.7	35849.4	35937.2	57471	48233.9	32837.1	45085.5	36014.9	60663.7	33028.5	29690.8	33125	31150.2	30550.5	56782	31832.8	37482.7	31142.2	42713.6	36562.4	33521.6	36111.2	38808.1	42960.3	32207.8	46200.3	31625.4	39834	37665.5	29099	45113.9	47150.6	35451.7	31677.6	34322.7	31923.1	39536.4	31247.2
NEG	M97T67	96.9609	67.4055	175840	293691	337143	166646	226150	161900	84967.8	303691	399903	193520	169173	475561	208298	288850	430932	161682	212241	209044	192427	178665	104283	247200	215662	168651	227488	252806	241298	148402	230095	118226	199942	227720	184709	235247	192309	418995	353302	184306	163007	240003	204714	204766	103974	195989	196957	153273
NEG	M97T482	96.9701	482.426	159899	96094.1	150200	170222	149960	139399	181722	164828	213183	114019	166465	171385	174182	184612	209333	162507	128477	124598	134107	151957	146391	89821.3	189305	220176	138419	131123	176263	239240	190112	223334	127534	136922	81063.9	185404	198085	253976	146436	167678	147237	169274	180593	146834	181730	161979	197869	191586
NEG	M97T246	97.0049	245.953	2835.03	3187.63	2874.26	4665.9	4217.96	3971.89	3625.39	3828.66	3405.51	2704.52	3246.82	2671.28	5641.64	6779.11	3925.44	3924.43	2855.89	3031.56	3252.06	2144.16	2381.54	2667.87	3213.89	3547.38	3373.17	3058.16	3030.19	4482.32	3365.62	3773.44	2174.16	2791.16	3807.95	3007.25	2648.04	4742.92	2622.22	3093.33	3044.54	2723.13	3406.04	3200.03	3820.49	3427.76	4102.53	3394.02
NEG	M97T174	97.0049	174.383	16720	11819.4	17027.3	16384.9	7353.13	10421.4	15693.3	12386.5	18334.9	11274.4	12761.5	9478.65	12395.8	21044.3	6920.99	12466.4	7906.29	8678.72	5644.99	7945.82	11454.5	8795.67	16865.3	15998.2	16291.5	12620.3	5459.83	8210.96	11764.7	6664.39	5820.14	6490.27	5641.77	17935.7	16277.7	10537.2	10578.4	16236.5	9266.83	6072.26	17338.5	12965.5	19912	32058	21941.7	13876
NEG	M97T272	97.0242	272.4	4894.45	682.274	998.75	1010.61	978.748	4568.65	3558.16	1275.54	4805.19	1164.96	466.258	5323.23	816.424	1250.26	943.993	3815.58	629.742	668.204	1515.73	796.923	3661.85	720.534	4419.64	1164.43	4109.7	1077.6	1632.62	1131.5	755.598	1253.09	978.871	454.751	3297.23	695.993	709.68	4335.04	1538.76	3804.65	908.831	378.566	3543.8	941.082	3981.91	1155.02	4606.96	1037.95
NEG	M97T103	97.0299	102.784	139607	153267	111298	18417.4	6103.1	4661.84	8032.17	5850.07	130028	110932	14995.6	139922	138721	35696.5	139920	9160.78	9176.19	5072.58	4618.69	100673	4459.32	159370	120410	8301.16	8939.79	4714.91	135738	5726.11	4026.25	4002.73	11822.9	121590	127071	2788.78	90323.7	9412.14	116670	98294.4	130758	136345	135707	1696.56	118778	128243	17306.6	6957.61
NEG	M97T294	97.0298	294.462	1364.78	20450.7	18113.4	2958.56	16754.3	4837.67	5744.31	22131.9	7540.08	13715.8	2084.2	18095.5	4060.56	2129.33	15784.3	6046.94	16898.9	4335.68	18673.2	3805.22	4222.94	19698.2	5107.34	2670.81	4062.51	19605	17137.8	3529.74	17578.4	15864	14681.7	2404.61	4326.51	3772.76	3755.81	5701.94	2570.66	13047.7	3377.08	16505.5	6142.38	3345.01	4960.46	12736.1	6535.5	2617.05
NEG	M98T685	97.932	685.384	4821.72	7051.53	5042.08	4825.01	12360.6	3757.55	3596.44	4415.23	5104.36	3822.53	3981.2	1816.21	4297.52	5076.25	4655.92	4641.6	4528.82	578.768	4193.2	4529.34	5052.41	3473.76	5145.05	4790.22	4900.09	4210.63	3591.84	4908.43	5517.5	3757.71	5227.59	10305.8	4098.85	5005.9	3936.94	4688.87	3844.87	4643.44	644.351	4168.45	4854.25	3952.85	4979.53	4785.96	3457.68	4781.45
NEG	M98T407	97.9605	406.554	6121.38	5871.87	6283.55	7994.7	7730.67	6327.69	6141.03	6980.17	6233.39	5777.03	8312.61	5961.32	6269.69	7720.2	7440.86	7093.83	6019.15	6941.19	6224.95	6268.37	7199.64	5547.06	6426.83	8643.8	6898.47	5540.24	7892.55	6394.46	6396.23	5553.91	5079.95	6062.12	6965.75	7327.7	6606.07	6339.44	6644.16	8766.07	7496.73	5647.57	5679.68	6329.56	5917.83	6811.68	7918.3	6827.51
NEG	M98T311	98.0075	311.086	597.668	781.526	816.558	1245.76	1166.24	798.242	1481.76	912.369	790.612	1180.19	1755.74	1074.66	3244.72	743.001	1775.56	4246.15	1753.14	902.809	2040.18	854.815	837.984	921.481	1065.58	1171.07	1538.32	1601.36	644.794	4239.47	1071.12	1925.45	1867.71	1317.76	2478.54	502.704	1097.74	3044.31	890.204	643.237	3405.61	2112.78	1269.28	612.286	1167.54	1557.8	1076.64	1287.21
NEG	M99T349	98.7083	349.397	749.444	2185.27	3117.93	2164.63	2043.52	2074.69	2821.07	2087.03	1992.98	2964.91	2652.25	1408.07	1364.61	562.455	2288.02	3167.06	3144.03	3096.37	1576.07	2237.1	2707.04	2039.32	2706.37	1782.8	2038.04	2988	1419.5	776.568	2931.65	1701.16	3203.91	2234.15	3129.57	1662.56	2070.62	1726.27	3109.11	2541.04	2134.13	3587.67	3551.21	2469.51	2887.51	2683.68	3039.77	3070.77
NEG	M99T407	98.9568	406.591	33653.1	38218.6	40475.9	49131.8	45075	41687.2	41154.9	41443.3	42432.5	32483.6	51802.2	41176.8	40108.8	44445.5	47701.9	41221.7	34767	43041.7	38508.7	37300	49569.4	34566.7	43321.3	50056.2	40425.7	34855.7	42823.5	41302.6	39712.1	37840.2	43649.6	37241.4	39343.1	36593.1	41334.9	36326.2	37528	46702.5	42297.4	37984.9	39318	37197.6	38795.2	42136.1	45368.2	42108.8
NEG	M99T22	98.9615	21.7005	83280.5	93304.9	90451.5	86736.8	97876.6	65341.6	84873.1	187673	105730	70500.4	92662.8	69967.1	92803	90246.2	112491	160854	81937.2	87409.9	71171.3	84851.3	87442.7	87018.4	112619	84026.9	86625.5	73671.7	93320.5	86765.7	71639.4	94750.2	83309.1	71189.5	87352.8	83740.1	88973.8	118710	68887.8	92490.2	96140.3	74024.8	80198.5	84982.3	85667.9	60968	74636.6	77054.6
NEG	M99T350	99.0071	350.193	885098	894368	965638	892700	984213	890811	910599	887550	1.00292e+06	828779	891064	940182	956065	1.16064e+06	1.05553e+06	957364	928786	846963	857460	862926	991096	831323	1.00463e+06	925948	918352	866002	984897	982090	948792	985717	940084	904060	959350	837992	952869	1.10862e+06	907563	891275	921455	912889	1.06471e+06	845422	976387	915643	944220	981725
NEG	M99T103	99.0093	102.848	59267.2	122173	143636	723782	181865	270888	294576	189663	342310	229819	479455	127285	165951	1.35544e+06	95115.8	279303	255850	162765	158030	316987	200870	87567.1	76477	369763	283758	160290	52091.4	233062	84203.2	123411	442848	119945	420997	155086	143510	302313	64528.4	92460.4	131445	145142	94031.3	107712	102885	393341	1.09135e+06	235024
NEG	M99T68	99.0093	67.996	40891.6	112760	99679.4	239719	132603	118903	120263	154736	116968	292651	50227.8	108637	41880.7	461450	38000.9	213054	96969.5	75353.7	38327.4	132222	123050	69736.8	69884	92114.9	111445	121090	46487.4	139159	70927.1	146523	155780	109393	138617	168930	89123.4	188506	62403.2	83124.8	114537	141827	157067	46005.1	60919.2	157285	387784	250132
NEG	M100T66	99.9264	66.031	298236	535351	324088	326946	597135	557251	674709	466179	468973	634384	694277	435239	378949	701393	444358	348946	805994	538815	301594	561549	174458	485569	364184	728584	477114	453834	678335	718120	413316	471849	925055	438260	540101	584995	431632	535074	303917	498492	444167	391467	481934	338479	522642	800245	711016	441366
NEG	M100T40	99.9261	39.627	187325	232111	224613	217866	207961	185404	101943	216200	224781	164251	58765.1	199477	204494	220376	289639	211649	190331	192970	187741	226286	108756	211125	234068	191056	214219	183194	207140	237624	264482	240097	154663	173114	205994	228312	213889	260069	239848	220610	201732	223159	204457	174649	192789	189400	217799	214592
NEG	M100T137	99.9262	137.128	397390	447878	399766	389792	369775	339525	380483	493676	238884	490768	419304	381919	369276	269384	393910	387897	327055	328712	320011	118428	185039	408522	376318	521269	391690	122998	395122	404553	382737	382498	443024	350361	391688	488165	407378	384194	372228	326621	357524	365591	136430	319076	371764	378670	400352	224314
NEG	M100T22	99.9313	22.293	70697.8	59419.4	45474.4	41751.3	143708	30237.2	31132	21728.7	64115.4	114665	27005.8	40856.8	30417.9	29348.4	42158.9	52550.6	37520.7	32708.4	35707	42667	42997.7	38402.9	37740.3	30109.4	42180.3	33180.9	34857.4	27970.4	46495.7	8831.53	60380.5	45860.6	38283.6	60259	38655.2	40781.3	44247.3	36819.4	55396.8	96140.1	25335.8	55539	64609.1	32767.6	25094.3	36236.5
NEG	M100T61	100.005	61.407	87695.9	18716.6	28353.4	38409.6	17013.4	33505.9	33378.3	26106.6	29166.8	27184.6	63168.5	33418.7	63453.5	29706.9	17010.1	30945.4	24062.3	19311.5	23517.3	36318.5	42472.6	14292.2	40897	84329.7	39047.2	45472.3	8419.31	45783.6	56012.8	14224.4	8851.08	62556	24415.6	84475.2	82916.4	49386	73294.6	61473.2	41918.1	30791.8	38377.8	26391.3	63323.5	44734.5	60655.4	61288.8
NEG	M100T103	100.013	103.085	11382.5	2863.28	2720.67	32276.1	7831.5	11513.8	13604.2	6042.24	4771.76	7836.97	20298.5	3294.93	6539.89	58830.5	4329.27	11348.4	8427.33	5100.94	5864.07	5612.1	5197.45	6701.61	7402.38	17595.6	12556.1	5958.68	2741.29	10774.3	5474.42	2347.54	20271.8	9139.21	7310.11	13448	9469.93	11371.3	21069.7	9316.47	7197.61	2301.74	7959.48	7405.83	8715.24	6121.79	25950.2	9862.5
NEG	M100T351	100.01	350.943	19139.2	18566.1	24687.8	26164.1	22889.1	23277.8	24591.4	23010.6	23450	21640.2	22589.6	18909.4	19835.3	28087.5	28377.5	23717.6	17323.1	15442.9	21773.9	22572.3	23189.8	16398.6	24991.5	18118.2	23069.7	16195.7	18834.3	12984.2	22751.7	25748.3	21708.1	20004.4	27805.5	22589.5	24044.1	24877	22981	23293	19820.1	26128.5	27576.4	21767.1	25956.8	21342.2	28088.8	20888.1
NEG	M100T215	100.023	215.197	1390.85	5228.68	1101.46	4638.75	1651.34	3238.25	3213.33	1080.24	1169.37	5081.8	6630.39	6817.29	5593.77	12078.1	2304.03	5488.27	3797.09	2188.15	5508.7	5520.09	7175	5023.21	5794.01	5312.82	5976.82	4165.46	5782.97	3227.3	6815.13	2395.54	2918.31	3576.54	10290.3	3059.03	1721.12	2632.82	1703.74	3054.03	5655.11	3892.11	2780.56	3310.13	3627.42	4160.98	3845.2	5491.99
NEG	M100T377	100.041	376.565	3660.31	903.68	2254.34	3439.09	2363.13	3043.5	2300.08	3025.58	2653.17	2096.77	497.706	2288.83	1735.21	2721.61	1260.08	2262.02	1470.79	1673.56	1245.29	937.165	1096	995.701	990.774	815.468	1545.63	519.608	859.323	882.451	1122.03	1188.59	672.033	2331.68	1085.72	2694.95	2053.49	2768.97	1844.93	997.74	1419.46	989.635	1365.18	2354.24	2341.18	1133.42	2081.3	2072.37
NEG	M100T200	100.041	199.966	2812.2	1777.4	1705.3	1928.68	2168.09	2084.35	2614.78	1251.58	2971.82	469.68	1301.42	2710.18	2327.84	3018.39	2105.06	2254.15	1705.2	808.143	1958.48	2486.35	3246.08	1588.69	2596.05	2845.41	2604.38	1822.19	1062.85	1980.85	2482.75	1896.19	1871.23	1613.64	2651.21	2890.38	5234.67	2037.08	1767.58	2479.02	2020.14	1951.19	4419.31	3343.22	3148.53	3894.07	3814.57	3990.83
NEG	M100T202	100.078	202.213	2062.42	496.728	3017.09	2084.08	366.077	1564.71	2113.42	1297.27	2094.53	1000.44	1126.24	1214.13	1575.65	927.92	346.886	846.959	386.476	461.812	536.801	734.763	1478.05	723.544	1204.73	1966.5	969.396	855.577	170.328	649.609	1262.37	368.388	160.342	832.295	697.439	2371.86	1888.92	586.971	1094.85	1304.25	789.053	516.793	2005.28	1498.6	2866.17	2290.02	2561.97	2873.12
NEG	M100T296	100.077	295.684	385.879	230.655	2767.11	712.172	587.035	1403.84	1467.36	1853.85	660.207	144.948	1344.99	1027.81	1011.41	211.512	913.416	1306.56	704.738	611.322	908.379	786.9	836.065	316.956	930.449	1165.88	764.091	429.056	689.108	1270.25	675.997	551.524	1344.53	1202.83	224.908	456.06	563.055	1275.95	393.48	309.915	574.563	700.021	932.828	474.015	1473.9	1801.47	1150.06	424.477
NEG	M101T697_1	100.934	697.491	14405.1	16526.8	6144.22	16293.1	4057.02	17201.7	5593.22	20500.9	16830.1	2659.49	15321.2	11294.6	9348.27	15881	15072.7	14045.8	16878.4	14961.4	15004.3	14840.8	16790.9	2503.25	13436.9	15073.4	14165.3	15615.7	13281.7	15141.4	14947.6	17910	17613.6	18398.6	15209.5	14148.3	15459.6	16361	14388.1	30149.9	13284.5	12712.2	17904.2	11914.8	16501	15942.7	16664.1	14388.8
NEG	M101T621	100.933	621.015	1103.88	1464.53	1476.51	1301.44	2097.82	2367.73	2463.68	2209.36	2372.94	986.878	1668.82	2179.52	2162.03	2466.29	2067.23	2188.53	1938.79	1374.66	1007.76	957.49	2183.05	890.061	2811.06	1087.16	2408.56	1918.91	952.311	2424.57	2502.12	2623.27	2632.4	1635.6	968.047	1266.15	3134.37	2661.2	20015.3	1114.68	742.962	2328.24	2749.82	1627.07	2075.13	2780.03	1137.87	2138.7
NEG	M101T22	100.939	21.853	4237.33	19091.3	4281.89	5468.57	3828.33	19372.9	4557.99	6138.36	5610.62	4471.56	6220.98	4342.22	4692.7	4060.2	5803.91	79490.6	4515.47	3604.71	22063.5	5233.18	4442.22	4709.66	11240.8	4380.11	4584.75	16307.4	4430.77	5262.98	4705.86	6487.9	6763.43	3492.89	5344.32	5706.79	4416.53	6535.93	6897.64	5657.64	7300.1	4393.51	4853.62	2892.01	8477.76	6246.03	2173.74	5590.5
NEG	M101T407	100.96	406.62	3202.89	1782.56	3944.33	4169.81	754.693	3387.38	5137.3	922.816	602.16	425.264	3130.79	1600.89	3467.69	529.024	719.035	4642.87	1941.59	742.095	2233.36	4041.82	3313.04	419.37	3085.2	951.516	3136.05	2220.91	3464.27	2406.98	3970.65	2161.03	638.05	3218.96	610.019	517.811	711.627	526.155	578.689	1473.76	592.23	2045.97	5026.49	426.484	586.6	668.155	625.793	681.5
NEG	M101T358	100.986	358.042	154559	171913	171086	165128	166348	161702	151260	147807	166927	136119	182998	164466	171067	189151	165200	171278	166717	150319	165379	171124	165040	141632	179535	152906	158685	146493	152668	160974	158707	170505	161495	166504	179195	169265	156264	180104	151583	177274	167419	153694	173014	152456	182429	154733	154191	154004
NEG	M101T697_2	101	697.368	9811.86	16910.8	28059.8	15404.8	18161.9	9476.91	12470.7	11424.9	16973.7	4947.07	9672.36	10642.2	2596.73	11608.2	10346.4	12600.8	7256.24	11397.1	14009.2	11265.8	12333.9	12998.2	9934.61	12542.9	8970.63	5284	6361.41	9407.89	14174.4	12922.4	9238.52	8354.14	10114.5	7911.14	11176.6	11854	8279.12	11780.8	7717.25	8581.4	10997.6	8524.09	9202.19	7515.62	12811.4	9757.79
NEG	M101T351	101.01	350.798	3203.52	115088	9068.49	110749	7358.12	111430	130758	2170.6	149073	85145.9	114743	61902.4	105292	6405.58	166314	8133.33	77226.5	95822.6	81163.4	129632	3795.53	134953	6008.96	100076	129894	4313.26	112534	698.381	4204.29	8814.72	7760.68	103244	4950.37	5370.21	6147.48	137888	85010.8	3892.49	6289.37	97659.3	8843.14	96576.4	212258	12834.7	10471.7	6073.66
NEG	M101T13	101	13.2995	20432.2	27812.8	25338.7	25184.9	31009.4	22110.1	25763.2	24256.7	25610.8	33262.8	25911.5	22672.3	22283.7	22381.9	33548	8320.5	30908.6	15713.9	24133.2	25649.9	3153.59	26359	9639.09	30152.8	31324.4	17928.8	29657.2	36847.2	30824	30934.2	27300.9	13517.5	12815.6	21677.3	24185	26868.6	27597.3	10386.7	26527.3	30308.9	30069.5	23161.3	21255.3	26782.1	21183.9	22362
NEG	M101T295	101.025	294.761	52065.2	55305.9	61685.5	136230	100691	83500.9	59919.7	80778.7	156633	45600.6	110479	128294	75807.6	81674.8	73685.1	70101.3	82600.8	58306.2	86047.1	58328.4	133175	56936.1	67814.8	69667.3	51882.8	79210.8	56792.8	122437	97545.1	78915.3	66350.5	60330.1	69952.9	51549.5	65962.1	119175	48947.4	110304	118349	54475.8	111595	55990.4	122410	73864.7	64529.1	55976
NEG	M101T339	101.024	338.784	13323.2	14679.5	13832.5	43101.4	38979.2	12768.2	12570.3	11744.5	45369	15322.8	13886.9	4515.47	13498.5	11262.2	12823.2	15531.4	10831.6	9603.43	9594.02	12624.7	53046.6	10732.6	15242.7	13698.9	13929	10516.8	10493	44886.1	12654.2	13289.5	16518.4	12034.5	15382	9681.18	11956.5	13625.8	9211.61	13993.9	16632	11492.4	13907.7	13371.9	17056	15082.8	13742.2	15935.1
NEG	M101T37	101.025	36.521	54020	19814.6	91970	74237.1	9680.6	73312.9	192443	51487.9	90474.5	128965	66913.2	29091.1	65557.2	64895.4	20071	29228.1	47225.7	10966.9	40128.5	31270	34101.8	41651.1	43392	114034	57670.8	84971.7	14980	35712.7	22771.7	28662.1	18184.5	17916.2	36018.3	177112	77768.2	32381	54215.5	121222	28499.3	18157.9	87659.8	107781	150130	203503	115901	128901
NEG	M101T206	101.025	205.995	10616.3	7190.93	11303	11194.9	11114.5	10629.1	10969.5	17785.4	15248	11426.4	12108.6	11600.6	10152.6	14326	14912.2	15452.5	10720.9	9529.48	11336.3	11447.5	15251.9	12090.1	12660.8	11345.5	10137.9	9858.22	11242.3	13825.7	13042.2	12310.8	13023.2	11453	9219.43	13382.7	11712.7	14637	11600.1	18948.6	13810.4	10106.6	16348.7	11265.2	10709.8	10276.8	11214.6	12347.7
NEG	M101T317	101.025	317.332	25156.1	10963.9	22368.4	20383.3	10162.9	21372.7	25453.1	14879	25111.7	15565.8	12557.6	14403.5	17929.5	15079	13159.5	12600.2	11833.7	12361.3	12872.2	13885.6	21341.5	11315.8	14589.1	23952.8	16377	12863.8	9563.37	12217.5	12900.2	12463.5	10886.6	14244.8	15529	16255.3	12987.9	13530.3	11683.4	14050.4	16817.7	9680.22	14102.2	25826.9	14781.4	28673.6	28256	24772.9
NEG	M101T79	101.025	79.484	56497.2	55170.7	37499.3	50746.8	43571.5	33687.2	54121.2	44447.6	52870.8	63575.7	43789.3	41400.4	51773.4	81651.1	56096.2	56213.6	65668.1	51856.8	33397.4	43621	123786	66937.6	85319.9	36222.5	63115.7	57008	65884.7	51423.2	46520.5	88837.1	88721.9	38231.4	75826.7	59950	99692.7	64346.6	71284.1	82021	67561.6	51085.1	82826.2	51048.5	72212.2	73036.1	64069.2	56393.7
NEG	M101T98	101.025	97.632	232334	128171	105634	143063	358817	253175	445274	263586	79669.8	424229	254212	190243	446262	230241	251439	533792	395638	301688	478088	127037	237712	226255	434114	135123	144424	171686	199770	253675	140999	544078	200441	196386	186429	425541	148913	331176	316007	437583	214637	216947	373999	176398	334071	158349	264721	106581
NEG	M101T45	101.061	44.932	80794.9	96043.9	266477	118556	115154	85899.7	105142	101392	194109	78886.1	132417	85778.3	97869	102700	117866	135555	88054.3	75448.3	106113	79089.5	41928.6	91623.7	131057	111459	124958	122309	77452	138131	125122	121326	132476	104082	124328	106444	87336.4	98511.7	74516.1	96787.9	143398	133813	133717	91799.8	142346	136097	272162	110659
NEG	M101T103	101.062	102.798	121785	47174.1	85761.9	61097.4	107077	113766	129871	49190.6	69187.7	95491.5	114318	89782.1	76537.2	63346.6	67434.4	75574.8	42436.6	47509.8	48046.1	53909.7	50048.7	41146.3	140098	135179	48772.4	114739	38702.6	67460.2	148983	57620	68522.3	39535.6	86499	57496.5	76996.8	56603.5	47188.9	51878.8	51500.1	50126.7	97928.8	56519.9	107194	131608	102677	107332
NEG	M101T64	101.061	64.233	74107.4	108591	116349	99458.4	119161	100529	104622	97063.8	88829	96764.3	149430	116618	157643	111076	174065	234259	129266	90758.8	138756	133139	47226.4	81733.2	141847	146038	141721	113770	93691.3	211369	154218	134790	84246.6	84064.3	229205	93952.9	161109	205790	74188.8	162788	94279.6	128219	154670	79590.4	128792	72985.1	129896	93122
NEG	M101T29	101.066	29.3085	28716.6	5330.19	44883.2	22647.6	4196.52	14054.4	29062.4	16059.6	27045.2	19002.9	16815.2	11777.5	21105.7	15517	7354.12	11819.5	6747.69	9480.26	9727.34	9869.86	5810.71	3898.53	9547.2	21568.2	14526.6	14635.5	2658.41	24888.5	13866.1	2450.26	3174.47	11748.5	10339.7	39058.1	22106.9	7887.65	10974.7	17192.2	18121.4	8901.08	25338	25777.7	31484.1	38222.2	48306	24823.5
NEG	M101T298	101.073	298.442	3094.89	1098.76	1650.39	1527.29	2448.73	1583.82	2142.79	1754.38	4345.97	1824.12	1378.76	1313.77	1591.46	1568.43	845.091	1085.39	2552.03	2582.2	1162.3	3338.68	4164.79	3558.31	1518.01	2295.44	1826.06	1969.45	3076.13	4092.73	1868.61	3710.36	3837.59	736.708	4492.73	3739.42	2964.78	919.994	1905.97	2054.66	1308.26	1187.06	2901.77	2087.04	3271.48	3537.56	2620.65	2683.36
NEG	M101T357	101.072	357.094	3275.18	2650.94	2241.51	2833.42	3110.42	2566.46	3873.87	3507.8	1840.79	1819.52	1375.39	3415.68	2327.57	3944.77	3768.22	2589.41	2074.06	1749.33	3472.15	1371.11	2672.31	2892.55	1876.48	3810.91	1885.68	3797.02	2783.85	2933.29	1583.94	1081.19	3119.97	1569.84	3897.18	3019.38	3115.28	4605.13	1114.74	2263.66	2962.76	1824.82	3003.42	2994.24	3829.95	3379.98	4270.43	3555.84
NEG	M102T345	101.982	345.276	1225.51	1186.93	1279.27	1047.77	1279.63	849.045	1222.68	593.974	1173.87	907.448	1291.05	1051.26	811.565	1079.95	739.097	843.787	869.93	815.992	880.853	870.325	848.484	1123.85	1179.47	1250.8	791.466	1437.69	802.323	969.753	1051.9	954.207	1018.97	859.631	1273.38	1368.95	902.888	1033.84	773.986	971.776	893.603	1027.03	851.614	641.58	1157.92	809.147	774.121	996.711
NEG	M102T246	102.01	246.037	2417.55	505.251	1855.14	1525.75	411.135	1069.28	1747.67	558.27	1889.19	707.006	404.711	424.45	1550.72	1082.91	483.227	481.151	400.614	402.601	529.037	417.625	491.336	253.063	554.705	2209.77	482.606	975.763	280.552	491.202	540.679	535.887	291.723	379.848	299.139	3923.76	1650.65	341.426	576.462	948.329	389.658	390.485	2212.17	2414.13	2003.02	2605.55	3054.59	3103.93
NEG	M102T271	102.02	271.094	24649.1	8706.98	17355.5	16536.3	8522.1	11817.8	17609.2	12518	23826	27418.5	13813.2	17121.3	13279.2	20947.8	9292.31	13516	20632.4	7767	8665.63	10681.6	13515.9	9920.54	14137.9	19695.8	15414.8	10604.5	5594.99	12456	15435.6	6782.44	7172.56	12466.7	10183.7	24487.8	27838.1	11913.2	13796.6	20414.7	13511.2	8802.9	20922.1	19028.1	25913.1	27579.5	30896.5	28165.9
NEG	M102T290	102.02	289.657	20634.9	9429.31	15812.8	15136	6093.39	10537.2	18849.4	11687.4	21027	10251.8	10524.1	11084.4	10588.3	4741.57	7297.52	10020.2	8894.63	6901.01	8128.87	10884.9	12600.9	10236.7	10898.8	3828.07	12825.2	10296.2	4011.4	8774.54	1510.21	5637.24	5822.3	8660.01	7932.67	21824.9	16603.6	11265.7	2787.3	27807.9	13121.3	8456.74	14213.2	16228.9	17218.2	22003.9	19720.2	22720
NEG	M102T36	102.029	36.374	1541.74	0	3545.09	1686.6	2004.6	1663.9	6794.23	1053.55	1870.05	4062.39	1041.74	672.876	2560.78	1617.49	313.845	96.2618	786.135	190.71	601.673	850.577	620.859	975.81	1114.15	4062.61	1385.88	2429.55	71.1668	169.726	315.512	72.1755	0	312.344	775.422	5638.47	1678.35	805.908	1293.32	2209.45	328.241	113.32	1904.23	3579.46	4268.18	8223.4	5119.45	3770.04
NEG	M102T92	102.03	91.6385	33623	2338.08	25257.2	37741.9	15478.7	14488.5	24825.7	29268.7	78913.6	33542.8	24126.7	12698.9	41766.5	49121.4	15953.9	28655.3	16449.4	13332	21964.6	13129.8	10266	22226.8	27719	21949.6	19555.4	21164.7	484.962	27263.8	28618.4	14247.3	26838.6	10679.5	18902.9	55939.8	53526.3	25771.7	10616.2	39857.7	26156.3	12166.1	29563.9	43083.6	54234.5	32870.2	41848.5	63855.4
NEG	M102T308	102.057	307.504	13788.9	15367.2	14087.1	24446.4	14077.4	17048.8	15624.2	12423.4	12690.1	22979.2	17814	18578.8	21300.3	14262.1	10145.3	20740.2	18378.5	6925.96	14423.7	9458.86	15877.8	12574.6	16403.3	11910.6	20863	10547.3	16306.6	19532.1	13393	11926	17330.1	17964	16432	11814.4	9046.75	21920.9	11786.9	12916	17621.9	11212.5	15768.2	13369.5	24578.4	22374.1	17000.9	16760.6
NEG	M102T377	102.057	376.917	17219.4	31672.9	27213.3	25850.9	33289.5	21849.3	32235.1	32391.6	26055.7	19526.5	45002.5	38506.1	91749.1	64965.3	39077.4	41944.3	36300.8	44509.6	40840.9	48133.4	56733	59611	49489.3	35911	32820.8	21009	35428.3	37404.6	32554.8	37738.3	27474.7	37751.2	46925.3	26758.9	35053.3	59223.1	23245.9	51914.1	57816.7	23251.8	42734.8	39764.3	36276.9	41536.6	54473	58763.6
NEG	M102T65	102.065	64.641	1877.75	4020.23	6806.05	5315.41	5548.97	4716.63	4556.89	5043.78	4180.94	3977.53	1871.19	5581.31	6928.79	5278.64	8730.33	10372.8	6324.2	729.419	8007.03	7621.11	1086.23	4160.83	4991.54	5938.84	5677.58	6252.51	4968.73	8301.04	5733.85	6182.94	3811.92	4277.63	12788.8	3225.4	8601.82	12212.8	3787.95	624.25	3949.72	4970.4	6049.54	3351.87	6179.03	3442.09	2099.15	4626.02
NEG	M103T703	102.924	702.765	1755.86	1809.6	1984.13	1740.33	2512.18	1504.89	2225.09	1957.15	1667.93	1870.35	1651.56	1309.58	1629.82	1994.99	2266.15	2043.28	1577.12	2269.59	1417.22	1868.66	1941.85	1502.7	1896.11	1881.88	1888.58	1868.02	1693.67	1805.34	2320.52	1860.9	4555.89	1525.3	2211.33	1343.76	1790.98	543.334	1195.68	2199.77	2020.36	1615.46	1379.79	1577.68	1894.67	2363.83	2156.14	2712.89
NEG	M103T679	102.924	678.557	3144	2698.49	2832.76	3455.49	1728.37	2093.74	2382.97	2443.34	3036.74	3206.19	1542.94	3062.77	1331.22	2653.17	1805.06	3213.91	2372.76	2225.04	2974.77	2872.84	2658.58	2666.9	2863.94	2946.9	2684.44	2146.44	2587.7	2874.76	2682.36	3320.79	5048.35	2643.05	6399.45	2690.08	322.902	2699.12	337.762	2622.33	2650.9	2512.21	3792.07	2622.82	3427.81	2902.52	3383.78	2526.06
NEG	M103T108	103.004	108.337	52550.6	48622.5	25327.1	117405	22384.8	32553.1	22720.8	28042	58166.4	28346.1	68512.9	58403.9	127912	117609	38425.2	50736.4	102738	23295.8	61051.1	67099.2	109461	55202.5	47828.5	52597.8	58547	54684.8	42116.8	71534.9	99959.3	89955.7	69168.2	23947.8	44078.5	140232	168739	76858	97008.4	147741	97530.9	37778	105878	112761	95453.2	69509.8	47060.7	86041.6
NEG	M103T291	103.004	291.106	35503.5	27247.5	45097.3	37763	38908.7	27008.9	34043.5	51260.8	60553.3	21929.1	36983.5	28500.9	38249.3	45805.1	62494	34557	30891.6	26396.5	7402.98	25778.2	37934.5	39441.9	42577.2	32137.6	41659.6	33407.9	24739.9	41494.1	32554.6	34597.3	30867.7	21662.3	55444	63114.1	79280.8	38226.1	34719.6	44545.3	22431.1	25859.7	22278.1	24414.7	36964.1	18974.9	33649.5	31181.9
NEG	M103T242	103.016	241.984	2637.17	870.058	1641.32	2422.92	1621.57	2001.7	1745.16	1541.98	1949.21	1622.36	2934.72	2637.61	1808.99	3058.76	1968.14	1837	2063.68	1456.09	2142.95	2820.31	2774.18	1304.62	1454.32	3272.45	1683.93	2327	2057.17	3825.64	2025.85	3294.91	3228.48	2522.79	2260.68	3134.33	2685.73	2295.51	3901.52	2946.46	2660.29	2655.58	2459.06	2031.19	2362.83	3991.6	3042.66	2746.65
NEG	M103T271	103.023	271.083	946.588	1729.1	2259.08	496.573	1793.01	1656.81	2974.42	399.376	900.87	2248.64	2050.82	1581.32	2373.56	938.587	2182.3	2728.31	2533.78	1588.9	1998.66	1714.95	575.317	1767.86	1892.08	1886.97	1944.29	1482.76	2546.36	2230.77	1911.43	1932.58	1602.23	1629.21	1856.14	786.925	906.369	2224.95	1626.09	683.599	2030.57	1768.83	1018.92	753.312	960.223	768.057	1116.18	1070.9
NEG	M103T241	103.041	241.302	25074.4	92276.8	56807.3	40457.8	49846	39955	52319.9	23792.8	36478.6	41990.5	112582	38338.9	38445.9	23163.4	15895.5	151451	29197	50935.1	41795.5	20235.9	33479	21596.4	26491.8	35576.3	28823	26555	42057.3	41662.7	22765.8	42058.1	57054.1	37620.5	37956.3	23246.1	15206.4	45510.9	26287.5	22186	75557.9	24004.1	35895.3	28080.9	40204.6	36495	25239.4	24197.5
NEG	M103T229	103.041	229.465	62428.5	42411.7	91670.3	35765.3	70559.4	44635	444342	65341.7	183249	126927	52103.9	45321	82967	52932.1	31658.3	57323.5	345289	24737.9	78897.5	73519.7	74115.2	97424.9	96190.6	67720.2	51704.5	58091.1	333097	170258	47007.2	69084.7	47033.2	47253.7	45766.9	34701.6	40235.2	131283	29408.2	79540.5	35475.6	30681.7	44427.6	40553	65674.8	54805.8	55050.3	30300.1
NEG	M103T194	103.041	193.556	70281.6	127935	130097	113670	118204	120211	211315	71688.8	98155.6	154301	157065	73008.9	116336	89878.3	69992.3	172259	151464	62719.2	153646	94619.6	137264	127156	124701	142511	137640	127298	119105	157771	73402.1	113333	176809	78139.1	131973	97219.5	80859.5	109145	81120.9	104555	140440	75416	104623	100575	200319	143071	103954	92968
NEG	M103T239	103.056	239.377	10103	13225.8	11734.7	11399	9545.16	11058	8184.33	10298.7	8397.45	16595.5	10662.4	10408.4	14097.5	11240.2	8689.94	9194.92	9842.41	9437.14	10400.8	8848.7	10556.4	7537.86	10705.5	10016.7	12433.4	9716.4	7695.98	9646.95	11469.4	10072.7	12811	11100.6	20035.9	9116.28	9651.94	11110.9	11218.1	10840.3	10865	10176.4	12122.2	9488.33	11379.1	12122	12117.7	11392.4
NEG	M103T103	103.056	103.486	3397.92	3593.75	7398.82	4339.14	4110.12	5153	6150.3	953.435	4190.3	6802.29	8048.72	3647.6	5183.56	3334.48	1209.46	4432.23	2965.88	10513.4	3921.69	4179.64	5443.4	611.989	4563.87	6786.33	3815.85	2718.26	2290.04	6599.09	2913.14	3978.16	5259.42	3865.53	7942.79	4163.92	2400.29	2325.14	3314.17	3856.9	5241.39	3020.8	13334.9	3115.43	4157.23	5506.71	4666.23	2237.18
NEG	M103T377	103.06	376.909	809.201	1578.15	1339.08	876.417	1388.12	589.707	1042.5	2083.67	1039.08	703.314	1867.85	1503.87	3950.88	2658.05	1381.56	1925.72	1320.36	1756.99	1567.31	2060.08	2693.38	1966.91	1836.16	1517.82	1243.67	766.264	1224.53	1610.79	1408.16	1830.11	1122.08	1615.55	2427.29	877.837	1366.12	2795.46	737.622	2564.37	2491.17	960.213	1585.53	1129.18	854.54	2132.72	2470.34	2557.55
NEG	M103T307	103.06	306.98	657.86	760.233	567.961	1299.84	513.737	690.416	686.886	453.049	580.352	923.992	791.307	830.273	863.632	518.764	438.758	939.209	790.518	244.856	556.306	429.934	594.677	509.897	732.602	540.858	826.104	540.961	489.861	392.885	599.239	523.363	544.442	773.67	657.283	450.137	327.972	1067.78	569.878	669.626	767.511	527.933	324.576	287.541	1321.64	888.046	587.735	687.786
NEG	M104T110	104.007	110.238	4231.93	10272	1296.38	7214.48	5237.25	1565.78	3171.78	2273.4	2266.46	1258.57	689.541	903.821	4230.01	6239.47	2533.57	2733.6	1691.64	2366.04	3752.98	1576.92	3487.12	2350.79	2632.24	4754.04	2562.03	2030.39	908.599	1254.3	3197.44	3820.54	1575.3	919.044	2100.29	4448.06	4877.4	4350.49	2699.81	3771.65	2413.03	652.566	1982.88	955.328	2472.78	3033.91	3576.93	3462.45
NEG	M104T131	104.018	131.093	105862	244451	40326.4	124216	47364	44344.4	60595.4	48564	68730.6	1279.67	1034.92	25712.3	23651.2	41633.4	24097.1	34243.1	16941.7	29413	906.393	557.663	1093.26	5647.58	1197.4	1257.94	1433.05	637.539	256.369	689.359	1409.14	1134.82	706.641	17994.6	219.682	39254.4	41669.3	41095.2	1435.07	669.909	11587.1	923.483	872.946	32479.7	4747.9	925.096	101667	1444.19
NEG	M104T147	104.018	146.696	56751.3	139920	20265.2	66677	23920.4	26660.4	36630.5	23522.2	34072	653.18	350.263	14593.1	12090.4	19459.1	11339.5	14434.8	7074.59	14796	702.034	617.151	480.503	4937.77	1289.4	542.736	2174.71	646.868	376.351	505.44	776.857	846.061	443.628	10910.9	535.493	23983	23948	20782.1	1028.57	424.919	5689.41	697.161	762.982	20506.4	2207.12	610.33	50255	1010.88
NEG	M104T33	104.018	32.733	19859.5	16598.7	11680.4	10154.3	4859.08	1906.87	11483	1572.14	3971.16	687.598	0	1902.19	1162.47	3495.98	1251.42	574.061	476.997	1018.48	0	119.615	0	388.598	246.788	1276.06	0	453.949	0	0	415.903	0	0	1657.91	67.7541	4340.23	3329.8	2028.87	2084.75	199.666	83.4792	154.117	234.23	1640.6	1729.75	1253.74	3882.75	699.655
NEG	M104T359	104.036	358.776	57506.2	75170.5	55515.2	79014.8	59430	50093.4	59609.1	53866.1	58159.3	51109.6	71098.1	69457.3	67175.4	80448.5	55911.7	80066.6	58870.6	55126.3	49343.1	68957.9	57627.6	60698.7	59565.5	51316.8	72017	46676.9	53328.9	60052	59874	69476.8	59997.8	68190.1	85137	56878.6	58912.2	83174.3	55170.4	85768.1	65821.6	69952	62081.9	56094.6	63755.6	66175.3	67519.9	70012.1
NEG	M104T194	104.044	193.54	3236.38	6877.36	5934.77	6480.49	5981.26	5512.32	10379	3597.98	5251.32	8248.5	7203.72	3615.62	6479.34	4256.99	4237.65	11229.1	8030.15	2874.09	8376	4395.48	7037.19	6608.72	6652	6556.62	5050.22	7162.03	6120.21	7906.83	4156.79	6013.26	8711.57	3214.29	6590.73	5161.3	4112.37	5192.33	2928.15	4804.38	6958.55	3133.25	4109.93	5642.16	9655.19	7465.53	5377.58	4407.9
NEG	M104T230	104.044	229.579	3026.65	1999.62	3986.8	1769.97	3286.3	2243.55	17465.4	4228.99	7705.83	5924.42	2201.11	3988.96	3760.76	2674.88	1470.65	2432.34	15272.6	1211.28	3825.39	3412.15	3538.22	4285.13	4410.34	3203.84	2265.5	3381.7	13997.8	7842.86	2017.08	3310.15	4798.7	2201.05	2208.1	1570.27	2296.78	5628.81	922.429	3988.17	1555.61	1416.79	2119.91	2002.43	2927.4	2638	2467.38	1519.05
NEG	M104T239	104.059	239.476	856.294	1219.13	1164.06	1103.21	900.765	1029.93	1406.84	783.858	639.204	1707.35	1267.36	870.353	1271.25	980.258	679.914	1549.22	919.53	806.395	942.75	958.093	946.221	623.015	1113.2	1007.64	1285.56	915.528	908.688	924.216	1039.52	996.265	1273.8	1048.69	1585.99	980.311	1035.97	1170.15	932.81	889.547	1206.11	997.527	1160.14	1043.36	1284.86	1015.45	936.507	997.202
NEG	M105T291	105.02	290.557	56629.5	43217.9	65820.2	70450.6	69953.6	49086	73546.7	63541.1	98739.4	39742.3	68413.3	66802	169002	109520	137269	73566.4	65170	106492	49941.1	67267.8	100579	68969.7	95390.4	73494.9	68133.5	49819.9	72166.9	64098.1	85592.2	86096.7	62191.5	56136.3	48717.9	66829.1	88025.1	91673.6	47722.9	95379	81701.3	59191	93979.7	82481.3	57889.4	64305.1	69475	95521
NEG	M105T129	105.019	128.858	20817.3	11387.6	17263.2	23766.3	11677	10494	12103.2	12247.6	8428.76	7340.34	9884.33	8641.63	10676.6	12878.5	10317.5	11627.6	11116	9523.64	10589.3	10874.6	9299.88	7103.51	9081.93	9951.33	8631.61	8802.68	7745.92	9847.64	9074.18	9626.91	10117	2401.5	9986.15	12453.8	10612.8	4815.33	9446.65	10687.1	11724.7	9682.13	9742.22	9615.77	8743.55	1345.53	15224.3	7200.05
NEG	M105T359	105.039	359.365	2383.75	2662.84	1852.61	2452.9	1219.13	1748.02	1916.25	1788.1	1819.87	1472.38	2785.01	2046.63	1941.27	2663.14	1615.02	2648.84	1846.46	1536.6	1630.67	2329.54	1986.35	1804.42	2343.75	1763.28	1959.54	1045.79	1577.19	1747.53	1746.27	2374.73	1828.25	2017.01	2927.06	1696.34	1899.64	2546.82	1342.72	2667.94	2330.58	2108.72	1958.97	1738.23	2073.32	2288.52	1989.82	2100.2
NEG	M105T23	105.041	23.4775	19923.5	5836.68	18020.9	13573.2	531.968	0	16352.8	16178	15377.2	21926.8	12512.1	4201.48	591.582	15032.3	470.45	1034.98	6375.91	12665.5	18181.1	1251.76	844.393	3844.99	4317.35	2398.64	15995.1	6642.83	2631.73	19640.2	15910.9	23061.7	11437.5	6776.8	9000.75	18907.6	2664	333.707	14911.7	7156.6	13285.3	7208.45	0	1127.56	11566.9	463.692	24365.3	9206.32
NEG	M105T229	105.045	229.485	510.925	340.974	592.181	285.731	513.927	363.612	2989.43	490.64	1249.3	1020.39	495.291	361.516	686.701	447.669	284.787	445.49	2146.28	284.806	536.447	506.132	509.703	540.258	730.691	736.732	413.362	456.347	2232.41	1271.93	279.345	479.601	421.972	263.119	310.584	341.876	357.871	883.83	328.951	439.112	348.196	368.362	346.367	353.18	574.586	362.823	369.805	295.837
NEG	M106T131	106.014	131.287	3870.41	9016.96	1824.25	4247.47	2002.62	1844.39	1553.81	1749.69	2316.68	758.677	1315.16	387.731	589.453	1409.91	706.877	970.19	964.467	797.504	861.672	941.707	1498.27	1204.62	1570.97	1617.72	1212.03	824.258	840.43	1056.27	1818.26	1535.99	1283.75	1247.27	2037.25	1425.18	1804.06	1746.19	1077.22	1917.53	1145.79	895.473	1681.43	742.682	1658.02	2273.79	3271.17	2703.43
NEG	M106T291	106.023	290.897	1710.35	874.229	1733.73	1650.08	1806.52	1613.88	2226.65	1672.14	2971.23	1035.79	1808.42	1727.77	4574.51	3717.63	4825.94	2477.15	2433.94	3314.44	1238.4	1915.28	2790.2	1840.6	2587.28	1337.87	1404.03	1508.9	1636.63	1934.84	2715.7	2871.09	1443.08	1570.94	1771.22	1712.39	2698.22	2889.37	1267.05	3699.96	1645.13	1742.53	3109.74	1843.83	1503.84	1585.55	2093.74	3441.46
NEG	M106T95	106.042	95.213	10176.5	8132.45	9341.28	20197.8	8492.09	8100.81	10464.2	9838.19	7744.12	10884.7	12808.9	9817.75	10153.9	16228.8	6132	13235.6	6739.52	8580.58	6805.41	8813.33	7251.58	8843.15	11247.7	15315.1	9364.4	9015.24	2433.7	13292.7	10963.2	12598.1	8523.57	10305.5	13410.8	11834.3	18089.9	16682.8	13763	14248.3	9781.45	9497.45	10996.6	7829.79	10411.4	12537.9	10779.7	16244
NEG	M106T74	106.042	74.141	11269.4	9385.77	10929.8	10684.7	8556.48	8401.23	8944.41	10173.2	10033.7	8049.59	9455.91	12286	9935.49	12174.7	9570.57	11094.8	9359.9	9722.58	7340.18	9518.68	8724.56	9477.03	11738.2	12713.9	10667.3	7914.18	8220.98	11319.7	10567.2	15284.9	12371	11814.2	12366.3	13430	16977.2	15964.8	10720.6	11519.2	12042.2	9723.98	11631.5	7748.22	10071.2	12870	10045.8	15485.2
NEG	M106T24	106.048	23.6095	27583.6	17473.3	23954.4	17442.7	2446.61	7768.35	30443.2	20497.2	23670.8	28862.7	16937.9	10725.8	4798.71	26081.7	2437.74	3926.22	8206.99	16815.8	26356.6	4164.12	6545.72	7849.27	7571.08	7280.71	32602.2	9656.19	2058.08	30364.6	28597	29201.8	21268	10997.3	13244.3	36412.3	8796.6	3213.43	20956.6	14133.7	21572.3	8668.44	8932.97	7470.19	27279.8	6344.13	45855.1	24681.9
NEG	M106T279	106.067	279.13	944.674	784.667	716.862	951.315	752.608	1300.89	953.096	685.489	790.714	944.074	1006.62	629.738	1023.14	893.021	1017.02	647.17	690.725	1034.65	1045.59	896.363	1043.08	370.303	939.382	1001.14	797.601	575.046	742.626	392.742	1042.23	1009.96	944.847	760.214	959.28	680.43	891.727	538.741	598.594	1055.33	1377.31	803.151	983.529	358.312	787.374	1193.47	819.277	801.873
NEG	M106T98	106.067	98.028	835.877	430.352	294.846	778.495	710.647	650.038	1067.64	520.462	490.7	778.287	355.323	388.448	1404.39	695.995	956.615	216.016	682.027	1000.16	537.636	1043.58	966.004	914.956	678.398	1220.58	1120.4	1495.43	335.804	1096.07	696.118	1321.09	1773	165.361	1101	879.413	1495.52	3255.17	2209.17	633.619	1244.11	1197.71	983.786	713.132	686.263	548.4	860.455	737.281
NEG	M107T281	106.981	281.069	2508.85	5644.18	3565.43	4282.57	4196.04	3148.49	3823.86	3959.35	4387.61	2895.52	5771.56	5273.82	6339.2	8079.58	7084.67	7065.97	6724.65	4771.93	5003.53	5553.06	7477.05	5063.74	9778.58	6339.56	4979.71	5164.18	5488.51	6668.25	9478.37	7642.79	5975.52	5196.49	3114.95	5738.79	7528.6	9545.91	6394.3	6738.18	5960.18	5784.2	5884.43	5598.42	8882.92	5330.96	6536.24	5537.82
NEG	M107T192	106.981	191.968	8356.51	5282.14	9187.73	8396.98	4807.44	5981.79	9292.97	11651	11113.6	5332.05	9869.73	10192.8	14461.5	17349.1	12506.1	15033.8	7483.32	7074.29	8657.41	11630.1	15620.1	11626.7	18358.6	19617.7	11524.7	13455.7	3845.56	12456.8	17495.8	5361.67	4620.01	7720.61	4751.28	28068.6	30486	15257	15381.9	18022.7	11746.8	10322.8	17628.5	13621.9	24684.4	25120.5	20152.5	17726.3
NEG	M107T32	107.026	31.9005	9452.36	2475.07	7266.24	8498.54	1144.65	6205.65	6016.35	3298.98	8994.56	4642.85	4486.31	5462.45	7057.41	28782	2404.31	4082.57	1671.88	1689.08	1697.42	2998.98	2816.97	3525.15	2933.11	10982.8	3663.16	4204.88	1636.31	1069.22	2320.95	57691.6	37902.7	2194.1	4353.68	12740.5	7231.88	7690.3	5770.65	11071	26620.7	2186.34	9184.26	13297.7	11814.1	12914.9	10188	9672.73
NEG	M107T358	107.026	358.021	1092.47	648.491	798.442	540.744	422.049	470.916	772.484	963.996	842.67	1109.57	514.927	510.553	176.534	251.295	414.635	550.674	343.23	595.918	480.375	652.868	595.536	786.708	588.422	538.748	645.746	620.988	376.419	484.09	584.1	703.836	1117.01	467.9	710.995	597.268	486.9	338.961	465.449	813.452	895.189	517.18	519.413	574.496	401.69	531.149	295.547	528.827
NEG	M107T294	107.036	294.01	5473.1	4656.15	6234.48	5600.69	4589.11	4488.43	7373.7	2424.5	4408.05	4144.36	3868.51	4348.38	6420.56	6353.5	4004.06	3440.43	4883.64	2795.92	3594.91	3235.5	4499.52	5472.35	8750.68	7330	5893.28	4945.23	4855.05	6645.85	5762.58	5099.21	2701.96	5060.16	5400.99	2881.69	3928	4937.58	5071.57	5728.64	4892.16	5237.33	3538.45	4061.25	7267.33	5276.14	7075.95	4145.44
NEG	M107T313	107.05	313.454	6995.51	4237.35	4780.8	7430.37	6704.27	5644.01	5497.78	5018.56	6830.74	7099.44	7357.86	6830.4	7468.83	7622.16	5651.31	9039.16	4116.59	6224.53	5938.1	6863.32	4981.07	7158.46	7172.55	7444.98	6683.18	5919.21	8478.81	7461.11	8269.46	6183.15	5667.93	6929.52	5888.83	6913.2	7313.78	8040.46	6265.15	7187.97	6921.46	7136.14	8579.17	6184.75	7648.57	7142.66	7247.91	8020.88
NEG	M107T112	107.051	112.196	83436.9	30419	18889.6	76387.7	61408.8	23386.4	28332.4	41407.9	142185	56827.2	33044	122227	57841.7	69746.5	39827.9	47526.3	37550.3	51755.3	17615.8	37974.6	45839.9	10836	32105.3	95019.1	66502	14233.9	80709.8	52118.4	41864.2	39668.2	95900	119820	42630.2	50033	35848.8	18655	46778.9	142277	54835.9	52232.4	67450.3	32373.7	30686.3	434804	129134	31642.3
NEG	M107T128	107.051	128.076	10257	9467.5	892.797	9488.09	10322.6	8190.68	6650.4	24501.5	71095	10604.1	4911.29	62343.6	26670.3	31595.6	18743.7	561.16	14124.9	21724.6	8785.59	4696.57	10273.2	4128.25	1089.05	40481	28456.7	4457.64	35961.3	4727.98	1670.3	384.794	1202.02	58788.9	1801.6	28276.4	14005.9	2231.76	20213.9	68590.1	697.748	24705.7	1243.63	18009.2	2522.63	140734	67793.3	11385
NEG	M107T24	107.057	23.676	2.81019e+06	1.14704e+06	3.5403e+06	1.77595e+06	344319	90862.2	3.40615e+06	2.57868e+06	2.09726e+06	4.02613e+06	2.39884e+06	871907	156851	2.86964e+06	130268	271703	1.00475e+06	2.31567e+06	3.31338e+06	304005	464695	742113	714324	676300	3.85526e+06	1.13653e+06	456072	4.1495e+06	4.17437e+06	3.75251e+06	2.66746e+06	889264	1.75491e+06	4.58448e+06	141538	147325	2.88423e+06	850201	2.55231e+06	1.08328e+06	48819.9	453622	2.42585e+06	295415	5.21873e+06	1.84322e+06
NEG	M107T41	107.051	40.998	74693.7	43972.1	168862	105878	28887.2	35097.4	85699.5	50534.9	81876.4	80904.9	120519	45426	57440.3	74195.4	32839.1	40105.1	24246.5	101963	75058.8	28571.3	10402.4	22265.7	33839.4	82434.9	130760	53149.5	28674.2	54532.5	94288.4	78958.6	165316	55516.8	68764.4	108289	38811.6	12708.4	87080.3	59219.2	61588.8	59594.5	31609.7	38306.3	72511.8	53904.5	141654	70054.2
NEG	M107T143	107.061	143.078	2300.84	1243.53	1014.18	1732.13	1109.15	670.181	459.31	2112	563.515	3366.29	148.451	365.967	1118.82	792.126	198.061	305.023	1195.84	1416.87	2334.04	573.932	703.291	1064.86	276.326	1228.81	2302.5	1569.07	602.521	1477.37	560.926	228.417	250.607	1194.01	680.249	2593.47	1305.5	545.72	433.253	687.761	471.212	1067.2	1074.93	1057.47	834.748	2510.05	1230.41	1786.99
NEG	M108T351	108.007	350.744	27496.5	26444	23765	24634.4	26426.3	15057	26265.5	24975.3	26169.9	23725.7	27005.9	27085.5	23593.2	42331.5	32840.5	30617.1	27017	26612.6	10550.5	24539	25531.8	25543.7	33312	22826.4	24578.6	22159.2	26907.8	30146.3	24833.8	25022.1	27165.1	24074.3	24434.1	22031.4	25737.7	33097.7	25782.2	25882.1	23831	27675.7	31947.7	29809	30355	29944.9	28694.2	25411.5
NEG	M108T328	108.013	327.596	846.749	2554.28	647.008	843.609	1884.48	586.09	827.895	1249.18	868.495	766.621	1671.93	1970.85	1370.9	2289.63	1848.46	1582.38	1879.29	825.306	1328.18	1422.41	1556.36	1576.83	2363.07	1719.13	1957.27	1242.55	2029.6	1167.41	2678.35	1159.27	2283.39	1158.48	1330.75	1659.63	1050.2	1648.35	1663.24	1627.04	2056.65	1676.54	1268.77	1898.42	1483.77	1560.26	1538.2	995.382
NEG	M108T204	108.021	204.373	6946.61	19635.8	7277.45	9859.84	12244.1	9206.51	10747.8	10062.3	8691.25	10401.4	6787.99	8055.46	9726.25	11027.6	10864.7	10166	8696.89	8904.99	9572.73	9668.86	12317.7	8525.83	10619.7	9862.47	7329.54	9236.9	7638.22	11563.2	10299.3	9393.77	7037.1	9075.49	23703.6	11107.9	9442.52	14274.2	7108.23	9009.92	8368.71	7696.11	12357.5	8446.2	9762.52	9957.59	9067.97	8220
NEG	M108T23	108.028	23.449	51769.1	18799.2	56320.4	21292	62271.4	36295.5	57201.3	33376.6	56268.4	22855	24074	25565.8	100838	49233.5	49239.6	21022.1	37752	17546.1	26982.8	70157.1	24097.6	20857.9	23907.3	67264.1	51811.9	27212.9	34088.4	11712.5	40583.9	24327.8	24395.1	20481	16158.1	48002.7	40479.7	19488.8	45022.5	47426.9	18554.7	42290	63399	27000.8	45961.9	59722.1	30372	56013
NEG	M108T360	108.057	359.616	2136.6	2072.65	2638.26	1870.41	1828.64	2130.3	1740.81	1865.51	2370.38	1935.08	1971.83	2925.01	1666.54	2054.89	1751.45	2672.91	1475.04	1861.44	1864.27	1641.79	1924.89	1891.36	1921.36	1789.37	2385.97	1247.18	1485.41	1889.8	2403.52	1398.29	1561.86	2087.31	2801.24	1158.18	1213.42	1847.04	1007	2176.16	2068.33	1678.31	2082.2	2011.95	1772.03	1996.64	2804.25	2676.54
NEG	M108T113	108.054	112.859	463.637	2324.04	200.084	828.716	1069.34	655.035	582.307	2151.55	9811.92	377.141	0	6467.45	2568.95	3327.82	2269.74	299.369	1802.74	1969.02	496.214	412.307	1129.38	367.119	598.697	6514.95	4019.61	212.842	4682.46	95.3854	1299.5	877.763	0	8643.47	740.532	1360.29	1605.42	561.9	7582.3	11405.9	231.183	2624.88	2514.19	1340.45	982.696	28915.2	10141.5	709.068
NEG	M108T24	108.06	23.601	197844	74688.8	231693	114238	29233.2	6064.82	221394	182490	129652	269251	166054	58432.5	10898.9	176398	11793.2	15997.1	79298.7	163079	244115	21758.3	32289.3	47524	48461	50891.5	255079	82489.2	34523.1	278230	285126	248328	196553	66665.1	129866	304894	7493.65	8448.94	204175	59296.8	158905	71641.3	3793.88	29397.9	160407	21335.7	355966	103428
NEG	M108T295	108.082	294.987	367.645	200.308	1596.31	497.091	564.974	1067.12	510.874	849.526	592.621	222.934	784.691	499.911	922.514	279.086	478.68	839.643	581.492	315.623	548.811	405.189	501.314	271.56	744.926	713.193	395.602	421.169	563.075	823.069	510.916	741.04	1124.93	876.267	0	231.916	461.883	953.228	246.951	597.145	451.729	341.244	680.371	744.038	1271.95	1269.26	1044.48	222.121
NEG	M109T155	108.902	155.172	2557.76	5316.09	5902.88	6133.47	5373.39	5584.6	3051.39	6942.23	7390.74	6440.22	5698.58	6397.75	4911.11	6443.17	5832.21	6210.4	7026.59	6293.88	6579.77	6137.97	1419.41	4893.14	6071.17	6868.16	6712.56	5648.51	6854.56	6179.83	4791.04	7791.57	3076.32	4454.47	4450.4	6578.01	5622.25	6605.11	5757.25	6506.58	2962.64	5562.16	2845.4	5760.87	5122.96	3263.27	5483.78	6231.48
NEG	M109T34	109.006	33.809	3562.98	1131.67	6070.44	3233.37	5033.77	1188.34	1303.01	1367.07	1255.47	778.563	2357.39	1926.4	1144.39	1711.66	4672.88	1725.11	1626.16	1507.95	2155.15	1292	1621.54	1963.64	1612.36	1415.67	892.78	1122.01	2848.66	1219.03	1194.6	2632.85	989.092	2115.01	1860.88	2138.24	2108.64	1335.9	7252.7	1236.77	1161.69	917.031	5300.21	1488.19	1392.09	3804.75	3108.43	1147.53
NEG	M109T357	109.041	356.742	16362.2	14326.1	13002.3	16966.6	12022.3	12752.6	10569.2	14202.7	12212.7	10684.9	10155.9	11948.3	9023.14	5271.85	12590.1	12451.3	11621.8	10718.5	13995.7	11978.2	15238.7	12801.2	13409.7	11936.8	12494.7	15275.8	9873.09	13477.8	17452	15777.2	16542	12100	18946.3	12397.1	17192.2	10667	10576.2	11729.2	12569.6	12989.5	11705.9	11735.1	11543.6	14582.7	12841.8	17005
NEG	M109T23	109.036	22.9465	392712	165622	559511	148497	550925	294485	602875	190720	554987	44429	193031	103494	1.00043e+06	409625	459488	184084	271842	207460	269061	467809	176817	262870	210330	311422	543760	204597	328050	78810.7	378464	172190	200774	136162	182079	298982	413003	156636	403707	341441	155941	385136	658199	86124.6	2560.24	379933	228963	534660
NEG	M109T296	109.03	295.576	3742.46	2679.94	4791.54	4067.54	3123.27	3860.57	2315.17	3111.2	3768.93	2924.96	1485.94	5089.19	3061.08	3674.62	4787.7	3911.4	2763.61	3134.97	2376.62	2523.56	2534.73	2803.57	3315.51	3567.01	2832.49	2214.93	4711.92	2411.39	3439.44	3624.68	2120.07	2072.27	3036.65	3536.83	4753.18	3783.95	1671.19	3587.47	2114.14	1588.17	3771.8	3582.03	4741	5696.53	1767.39	3545.72
NEG	M110T30	109.948	29.8105	3865.25	34138.2	5231.33	2042.8	142.442	3935.21	3997.81	3385.96	7411.08	5620.62	1496.48	2999.78	3411.56	1349.77	0	860.667	698.09	1923.95	127.874	1286.03	649.168	189.857	1594.72	2354.18	1517.19	3191.82	0	353.504	2160.84	0	0	2498.61	59643.1	6998.36	11717.8	154.356	2395.49	2284.92	0	109.402	2423.81	2942.81	968.097	2825.66	2428.14	11708.5
NEG	M110T708	110	708.095	5007.77	9357.88	8095.99	10537	8555.99	6867.1	9506.83	7079.94	7369.1	21589.5	17131.4	10114	9882.46	10575.5	12908.9	11196.6	9469.31	8113.34	7887.5	10265.7	17198.7	12171.4	11239.1	8067.11	10492.7	6701.95	8923.76	7703.67	9085.8	10896.4	21040.1	8664.16	8779.59	9270.22	10392.8	29125.7	18903.9	8588.9	9270.17	8347.71	11869.6	10274.6	6427.19	4685.25	8788.8	11493
NEG	M110T649	110	649.471	7268.07	21721.7	9007.85	13726.1	6123.87	5436.64	11184.8	7218.92	10360.2	937.824	1375.91	8428.79	9399.93	8107.66	10366	12607	17262.6	6180.45	7040.54	5096.62	16336.6	5342.76	15243.8	9715.42	9404.86	6361.93	7632.72	14238.1	12591.5	4623.62	1430.19	5217.76	7802.87	8227.26	13364	7499.14	6943.79	27023.2	7423.72	8093.46	11637.8	7834.21	14167.2	3875	9851.93	11418
NEG	M110T685	110	684.537	6066.34	5930.68	8063.39	6199.99	6057.54	7976.88	7328.85	9376.22	7000.93	4789.36	8220.76	7709.51	1417.73	9627.58	9834.92	5976.4	19633.8	7974.08	7359.18	7266.08	11128.8	7264.53	9631.8	7405.8	3586.59	4999.01	7194.37	6584.88	3783.8	6210.76	9687.78	9704.47	6111.42	6758.26	13500.7	7807.55	5366.61	7616.9	11942	7456.66	9088.13	7532.52	7390.85	6149.29	11060.8	7572.03
NEG	M110T156	110.025	156.215	15157	15082.2	12288.5	10745.3	12471.9	16119	14665.4	14811.1	16148.8	15083	6228.63	8446.6	20753	10905.4	14844.3	8683.05	11616.8	8698.83	11536.2	10491.4	10780.5	12209.3	11030.4	10945.9	11312.9	12639.6	9175.73	22012.9	11500.7	21040	9407.81	8562.89	8551.91	11513.4	15738.7	15265.9	7415.9	15514.1	14546.1	11929	20631.7	8930.61	12259.6	16641.8	12122.1	13157.5
NEG	M110T23	110.04	22.599	36911.5	10394.3	38911.8	11698.2	43356.5	15452	41380.6	18452.2	26473.5	4814.63	9246.03	8880.45	105364	25680.1	30715.1	13112.8	12298.9	13371.6	17939.1	52348.8	12445.8	20918.9	13680.9	17741.6	38326.9	15442.1	22396.9	6535.49	22345	13188.6	14280.1	6626.34	11342.8	20763.4	25022	9931.47	23578.1	21415.3	13859.7	31229.7	47596.1	13909.8	18021.7	22491.4	13077.2	36763.7
NEG	M110T370	110.037	370.031	1576.19	533.93	1452.09	591.986	1456.97	450.206	1591.26	1965.3	584.965	372.062	1440.41	1625.76	1751.85	1867.96	1722.56	2133.93	1738.12	434.102	937.407	1252.98	1581.27	613.097	1796.4	1511.68	1768.86	1521.94	1254.28	1404	1797.53	1641.15	612.516	396.581	1016.13	1741.01	684.175	1606.11	1466.75	1252.39	1553.71	1508.16	370.071	350.714	1695.33	2105.28	470.578	1790.22
NEG	M110T359	110.073	359.288	13844.6	14383.4	13338.3	16224.4	13489.1	13485.7	12609.7	12300.3	13221.1	12203.9	14291.7	10376	15013.2	13185.8	14120.1	16252.2	9739.94	12773.5	12975.3	12418.9	14542.5	8874.6	15250.3	11380.9	13475.4	12972.6	12725.5	13247.1	14230.9	13635.7	12990.7	13253.4	17464.9	14651.4	15966.1	14528.4	12979.5	16006.8	12306.3	11227.7	14929.1	15769	15394.9	15269.8	13069.2	17168.9
NEG	M110T298	110.073	297.884	9833.19	2606.01	6840.49	6592.13	2582.1	5485.98	9206.03	6801.79	8679.94	5550.26	3824.97	5781.08	6684.52	5598.17	4011.67	4455.96	3193.05	3582.97	3646.45	5140.03	6837.44	4186.08	6229.74	9836.37	5065.96	5688.28	2809.19	3852.91	6153.53	27772.5	40944.1	4199.67	3504.72	12469.9	10674.9	3812.61	7525.65	7411.55	4424.64	3306.91	7727.66	7328.3	7714.54	10931.6	10519.6	12423.8
NEG	M110T141	110.073	140.971	626.614	95.1221	1065.06	748.461	234.77	114.607	365.442	262.361	357.213	227.207	122.309	359.319	468.512	201.453	144.89	62.7994	127.39	29.7907	131.806	236.881	1999.82	140.767	355.587	22616.1	98.0003	169.369	275.489	356.404	134.424	83.5004	119.024	82.6539	189.911	729.377	844.83	221.197	728.609	434.523	255.825	0	7630.37	513.399	781.118	8080.09	577.75	639.314
NEG	M110T295	110.098	295.3	22342	11200.5	75223.4	21249.9	25050.5	38425.8	27341.7	42550.9	29539.4	7947.04	31941.1	22330.2	47127.3	17799.8	33978.1	34264.2	24054.7	21129.4	23606.5	23086.9	26531.2	10222.9	23815.2	26345.3	26278.3	25216.6	22308.2	30912.6	24511.9	26411	38227.6	26112.7	7075.41	11598.8	21981	28106.9	11235	17661	30561.4	22003.2	32045.2	22577.7	39545.2	48581.5	33368	10564.4
NEG	M111T155	110.9	155.47	7012.54	4119.46	4969.84	5012.17	3668.84	4304.83	1609.52	4843.27	4701.09	5392.62	4476.74	4543.49	4378.44	4091.23	4621.37	3700.09	4878.23	4942.88	4841.82	3550.48	727.618	3792.3	4698.07	5079.49	5227.59	4724.79	6483.16	2845.59	3786.68	6048.42	2256.26	3872.93	3321.84	5123.24	4399.84	4510.76	5108.48	4396.34	2024.4	4535.12	2629.11	4775.43	2874.69	3271.91	4285.42	4916.16
NEG	M111T34	110.958	33.963	56200.8	31635.3	19590.1	8198.71	21220.7	15268.4	201177	82402.4	49494.1	728.609	28152.6	4521.21	117141	10080.2	12001.8	12406.8	12096.6	14021.2	7874.77	35345	33522.5	7648.23	53443.4	18076.3	13781.1	56930	3956.23	9324.51	24391.7	39127.8	35141.1	4481.44	45707.4	47534.6	11830.3	9981.7	96907.1	19594.9	39266.5	46615	7550.72	7562.84	9948.57	100035	18708.8	9450.53
NEG	M111T35	110.976	34.562	20872.1	106641	32669.2	20203.3	34637.6	20279.1	22175.9	23603.7	21650.4	10449.3	24071.9	20837.6	29612	21535.8	37959	15356	28053	42590.3	15371.1	24749.7	18801.7	24551.1	20391.9	23972.2	22377.2	20839.2	30726.5	16837.3	24360.3	21007.9	21692.6	16506.2	20050.8	20163.7	27785	17054.4	22387.1	25823.8	20259.7	20630	29995.1	19017.5	13019.8	24202	13318.9	17895.7
NEG	M111T390	110.97	389.988	2158.05	1153.64	626.456	671.989	822.73	1471.95	479.913	608.433	1123.6	979.435	1416.01	1136.43	924.565	861.922	1167.2	1408.53	550.136	1212.97	1057.11	1207.52	959.014	1042.42	896.117	1454.77	542.368	987.651	1356.25	530.675	491.757	830.466	1243.06	1146.25	816.614	687.236	1183.45	915.145	1610.44	442.581	1169.95	1365.26	794.431	1033.4	756.781	553.583	721.231	809.137
NEG	M111T441	111.01	440.554	866291	323391	595255	756031	573694	652139	872031	567541	692707	560185	1.01816e+06	726022	827764	972195	1.0499e+06	991284	530905	770995	546021	791110	668140	537943	953805	1.14884e+06	1.11643e+06	544014	841042	989830	912217	1.14057e+06	617650	560964	180550	751667	883352	962243	786271	913959	628129	830744	640235	513321	950543	833584	1.00033e+06	811716
NEG	M111T474	111.01	473.522	573454	602668	450415	564534	495069	942800	1.36133e+06	661317	748855	498366	607860	455785	556529	872629	643881	635045	542192	590594	488731	732474	464119	1.04983e+06	799161	762563	967243	761248	966156	906506	494808	420497	891474	646464	595247	719595	815507	1.08262e+06	551564	1.04385e+06	668004	849958	371659	505151	557374	957686	310741	763540
NEG	M111T561	111.01	561.38	279377	196698	277721	310335	285841	343448	947818	137189	334813	179966	377076	275572	850548	737851	315808	370675	100041	276938	209070	585172	808034	107462	86800	458849	720770	377994	604073	248453	897692	162582	281585	117513	185656	732052	393594	751980	188217	297476	589948	294232	304927	361512	668279	320039	867403	873487
NEG	M111T492	111.01	492.31	278152	330794	377432	375300	250956	378982	489954	262685	362014	314377	467168	282309	361452	418083	554815	438222	340724	385404	356377	503437	478919	433594	461708	520050	494616	424391	432969	553659	441395	460340	415191	410536	329972	387270	504040	467695	413892	469303	398718	345890	292180	278055	523446	202872	523197	552367
NEG	M111T157	111.021	156.855	86309.1	89370.3	63438.4	92685.2	93022.8	83836.7	112010	95664.8	90212.7	79630.4	48587.6	78780.1	123318	88557.9	100154	64374.6	85633.6	75511.9	87625.8	56191.7	69287.3	81220.8	82984.8	89186.8	60075.4	82347.7	81263.1	121365	88963.2	119295	53383.3	86176.1	83095.2	82953.2	90009.5	79439.1	48922.5	83630.2	94796.9	80319.6	125381	83799	93510.5	109973	88066.3	92029.9
NEG	M111T294	111.021	293.607	6858.55	6025.94	12090.6	8374.01	8494.35	12305	7802.41	8395.16	8816.41	7172.21	8686.94	6531.86	12813.7	15444.2	11351.9	13671.8	11635.5	8507.53	7070.7	8628.71	9432.04	7965.55	8762.76	9949.99	8413.51	6531.22	7960.7	9610.34	8629.1	10270.8	9783.38	6761.32	7237.01	8363.77	10914	11962.4	8626.12	10333.6	7789.67	8586.74	8929.69	11640.8	9534.89	10767.8	9392.7	8261.25
NEG	M111T222	111.021	222.478	4217.29	4396.79	7332.66	6304.69	7585.65	6882.07	7266.91	9748.32	9063.66	5549.05	9817.54	5719.56	7445.23	11830.3	11404.1	12606.4	8194.95	7842.23	7063.49	8889.96	9639.92	6085.36	8778.98	7540.55	6631.88	4272.29	5058.53	6015.23	7709.42	8767.99	9166.5	6002.3	5332.86	7981.57	16586	15296.6	7461.79	11257.4	8996.8	4958.09	10008.1	6224.39	8904.6	10798.2	7217.12	8660.36
NEG	M111T87	111.021	86.558	25720.1	23772.6	55225.2	60205.2	51276.8	45202.1	69971.1	45946.2	85637	88577.4	42721.6	59394.6	133232	104484	187976	72952.5	115985	78882.5	81469.2	44316.2	73732.8	68440.5	97892.6	76639.4	59326.5	76363.5	59071.3	80916.9	108385	87802.6	56830.7	31034.6	31889.7	50790.1	174097	133839	53143.6	95158.4	104417	53619.3	68270	89385.3	72231	97129.1	96184.8	83893
NEG	M111T272	111.032	272.401	7776.6	8972.91	8882.17	10800.4	9554.72	9460.42	8930.02	9208.79	9775.57	8616.91	9271.99	8725.86	9932.26	11859.9	8368.43	9761.31	7839.44	8619.21	9651.78	7238.78	9453.73	9603.22	9326.47	9575.57	9529.3	8649.52	9414.08	10929.9	9283.43	10038.4	8872.76	7828.88	10756.7	8758.59	6594.25	10580.4	7558.78	8944.76	8846.57	7762.95	8928.48	9219.02	9894.08	9652.4	11326.3	9770.98
NEG	M111T13	111.032	12.844	4752.36	4709.66	5660.34	4985.14	6845.38	5974	8519.7	4920.54	5746.56	5935.51	4919.41	6697.86	893.6	2698.65	2446.48	5355.55	765.781	4147.09	6799.25	4621.04	4470.46	4820.65	2549.9	6645.6	4282.86	5312.35	6957.4	2474.78	6336.46	5951.02	3059.29	6875.64	5573.7	5409.83	5359.89	5361.67	5752.12	1543.82	4939.64	7087.99	3154.91	5653.94	5680.2	5025.5	2941.45	934.83
NEG	M111T298	111.057	298.351	20604.6	5538.48	23309.7	13126	4322.95	10726.7	13895	11925.7	27252.9	10962	9557.45	9606.11	10657.4	11902.5	7614.86	11912	6033.5	10248.9	7267.36	10213.5	10732.9	6853.96	10974.5	14722.8	12844.2	10947.2	2629.01	9199.66	15091.6	2925.29	2100.58	7641.63	7531.52	29303	21480.6	6869.8	10137.7	13776.8	8737.43	7394	14781.1	13333.1	17879.7	25132.2	17844.6	19970.7
NEG	M111T268	111.057	267.768	8268.98	1201.2	7750.18	5943.93	5368.9	5427.77	7358.09	5155.04	6435.46	5558.19	901.408	4091.74	1271.28	4780.09	1769.14	4285.43	3822.64	3531.37	1580.47	1440.29	1224.41	1186.57	2116.23	1137.17	2818.6	806.997	1624.87	1261.53	2046.1	2496.28	888.817	5241.92	1279.6	5139.92	6100.29	6372.11	4576.56	1123.3	3433.87	2303.12	1177.04	4746.26	6444.02	977.363	4758.1	3058.25
NEG	M111T102	111.082	101.679	4801.83	2895.26	6248.68	5530.92	9477.61	7552.89	5613.41	4825.47	5264.66	2984.61	6647.16	5118.94	9353.45	7082.73	6562.74	10917	6657.03	4629.63	9691.91	7195.47	10682.3	4260.21	5693.56	14387.8	7347.68	6513.99	5477.93	12032.3	9581.41	8347.6	6925.81	5269.4	4224.4	6109.73	5175.67	10192.8	5101.35	7130.17	5809.74	5947.46	8485.57	15272	5759.44	9440.38	5225.43	4738.4
NEG	M111T296	111.101	295.514	1146.15	485.944	5533.59	988.613	1828.7	2992.72	2474.94	3668.72	2256.07	10528.2	2149.58	1952.05	2664.89	1128.15	2579.35	2675.81	1457.42	1218.92	1844.47	1462.27	10418.5	6351.05	1470.56	1622.2	1487.95	1256.65	1118.71	2698.97	1160.72	804.639	2357.6	1811.69	6781.4	405.742	989.211	3033	989.03	1370.79	1999.24	1155.6	2380.29	2006.23	2958.48	3314.5	2378.02	731.984
NEG	M112T162_1	111.714	161.752	489.89	473.782	730.652	580.826	625.672	644.068	663.864	610.487	623.35	696.873	572.5	507.391	577.026	416.781	1002.44	877.44	648.526	667.395	576.266	784.067	493.332	563.113	902.562	1026.3	618.921	451.534	674.402	1094.89	900.526	799.488	105.202	590.658	758.041	770.259	735.426	797.221	502.277	647.692	610.093	525.093	907.106	663.093	1016.52	1126.45	936.693	599.098
NEG	M112T392	111.929	391.527	826.214	944.601	488.502	966.557	637.044	460.918	493.813	516.241	671.784	448.453	538.742	837.964	834.358	1183.14	702.48	960.426	580.921	561.624	694.954	570.698	635.154	383.441	570.479	461.074	640.777	493.244	659.954	480.134	607.307	495.784	587.936	752.49	618.06	780.309	732.577	1091.59	412.042	584.013	570.221	374.953	464.94	771.731	585.417	358.874	910.049	495.032
NEG	M112T281	111.948	281.002	23401.2	39302.2	25629.6	29731	32127.3	27443.3	24702.8	29534.1	28808.8	25181.7	43637.1	40772.7	53340	68370.7	52919.5	63141.2	47823.7	39906.7	37244.8	41191.2	49636.3	40281.6	69987.3	42337.9	44043.2	44060.3	45500.8	48923.9	70036.6	57084	47082.9	39652.5	21738.9	49338.6	53222	60246.7	50705.8	53083.3	46303.7	40734.1	47310.3	39865.3	61170.2	44902.1	50896.4	42582.5
NEG	M112T407	111.948	406.507	21865	21716.6	23401.2	31236.5	27663.5	21447	23715.9	25639.7	25293.5	19043	30613.8	23561.9	23969.6	28350.5	27635.2	27288.5	22980.3	25752.6	21194.9	22532.5	28362.7	21886.2	22694.5	30782.5	24443.1	21531.5	25376.9	26951.7	27302.1	23209.1	27494.9	19437.2	25155.6	22734.3	26591.4	23791.1	22419.7	29618.9	27194	21144.2	25995.4	21929	25547.8	27356.4	27364	26372.6
NEG	M112T76	111.948	75.8195	232153	122002	139655	128617	123143	77161.1	132328	259092	106793	71652.5	135516	62996.3	159151	108048	226476	123180	100606	120151	77247.4	103051	41371.7	95149.5	67464.7	43371	88084.3	80210.6	90752.6	86208.5	110826	98068.9	69535.5	69362.6	53796.1	98539.9	300968	110954	97798.7	75071.7	73402	81423.3	67816.1	89073.8	107652	60548.4	51865.3	93306.2
NEG	M112T692	111.948	692.3	3343	3242.6	7589.73	3848.92	3907.77	3483.47	2672.32	4054.64	3351.79	2989.71	2722.43	4836.26	3413.29	2983.7	2962.94	2780.84	896.966	3004.32	2746.73	2865.23	2783.68	3636.93	3375.25	2822.62	3602.02	3001.3	3421.74	2667.05	3182.2	2943.06	2653.57	2805.43	2515.61	3513.8	2468.98	2694.71	2905.72	2881.27	2661.48	4257.44	2572.54	3036.5	631.493	2707.32	2831.06	2565.85
NEG	M112T673	111.948	673.226	2361.15	2730.18	580.416	2323.95	3406.42	2895.06	1969.76	4915.73	2623.22	1879.86	1911.82	4508.31	2232.78	660.738	2059.89	2057.14	4023.69	2400.68	2147.78	2107.43	1925.08	2804.7	2437.32	1722.47	6552.64	1871.93	2658.67	1592.58	2122.67	2431.99	1878.19	2233.83	2083.53	2709.43	1951.43	2058.71	4387.02	1942.49	2037.56	2936.87	2228.68	2031.27	2097.76	1380.23	1850.59	4167.3
NEG	M112T633	111.948	633.468	3173.68	2940.73	2719.92	3255.64	3317.31	2206.7	2630.32	5526.46	3734.93	2329.11	2488.54	3117.73	3311.4	3754.69	2792.2	3281.02	2734.85	2680.18	2496.99	2791.05	2767.12	2644.29	3176.38	2636.4	3203.13	2299.39	3435.7	2613.4	3389.45	2889.76	2378.4	2719.61	2527.66	3257.91	2287.84	2983.94	3096.47	2717.41	2412.24	3600.08	3467.35	2768.2	2694.2	2698.45	2900.72	2647.92
NEG	M112T22	111.948	22.3735	188753	132134	222818	156683	173076	121579	213041	133692	155346	275763	160411	96876.1	94433.9	203804	100870	108416	176400	179277	169459	86226.5	145971	111818	115067	230941	181212	133202	104200	236758	183340	224143	146350	123670	112450	184025	2872.06	91536.9	171080	141699	144754	134678	132065	143079	180980	166123	212394	116553
NEG	M112T440	112.013	440.417	43174.5	14702.5	35069	39572.1	34292.4	37800.6	47163.9	33161.4	37382.7	27195.9	49690.4	42551.3	43330.2	52466.7	50518.7	52240.9	35371.2	24800.5	33020.7	46787.1	38982	30096.6	48889.4	60155.2	49432.9	27238.1	47108	49558.4	40533.9	58395.8	33086.8	41983.4	9769.71	38468.4	48553.3	50482.1	46349.7	45106.3	38562.9	43190.5	39455.8	28515.8	55610.9	44072.8	51007.2	43874.4
NEG	M112T476	112.013	476.167	59593.1	16596.1	39051.8	27364.5	47857.9	38761.3	35943.6	6998.95	37449.2	23623.6	41228.5	31806	54686.4	47998	25381.2	37464.4	31324.9	27109.7	28980.5	32177	34751.7	16040.8	42158.8	32707.1	67969.6	28373.1	3255.19	46584.7	32423.8	25010.9	54370.1	20400.6	26505	21929.5	31983	37914	33658.1	48878.3	37278	33016.2	33132.8	25761.5	32645.9	41771.3	42453.1	35600.3
NEG	M112T272	112.016	272.397	8380.43	7728.61	7460.38	8989.57	9363.5	8909.94	7381.54	7864.14	8141.57	7643.12	7720.63	7494.49	9979.98	10145.8	7421.76	8187.11	7488.57	7726.66	10574	7719.35	9548.81	7330.33	7926.23	9622.87	9320.45	8089.32	8294.17	10499.2	6987.6	8217.43	7868.96	7084.74	8745.37	7425.67	7139.71	10083.8	7189.97	8055.42	7870.68	7455.09	8959.59	8097.02	8315.34	9261.68	8683.84	7764.51
NEG	M112T157	112.024	156.859	2991.62	3206.51	2987.07	3055.24	3030.74	2894.59	3230.66	2957.49	3750.71	3678.27	2104.44	1390.75	3986.84	3051.19	3552.35	2167.16	2215.47	2324.68	1228.79	1242.81	2325.7	2834.44	3030.16	3422.29	2574.33	2451.32	2980.77	4209.67	2259.03	3104.74	1459.48	2821.6	3088.18	2834.35	3243	2765.56	2032.17	2322.8	2401.5	2731.54	3982.07	2789.62	2902.6	4339.55	3152.88	1683.43
NEG	M112T162_2	112.052	161.7	205432	135982	196732	192766	186991	192178	188525	216154	225887	180009	198899	201920	248811	284213	267381	197149	186887	194857	180246	211396	303214	153762	194310	299752	243307	142415	203007	257007	249998	232599	199541	202241	216186	178685	251274	257391	196104	232892	194428	235143	257753	186440	247747	335936	314811	194155
NEG	M113T29_1	112.652	28.5735	14572.6	11980.4	12838.9	14624.4	17766.3	16403.6	13034.2	14846.9	16312.2	11372.4	13724.4	14426.5	16410.8	22380.9	17542.3	16350	14532.3	17281.4	10803.1	15917.8	12414.8	19690.3	20392.5	11572.5	13037.4	6543.41	12359.1	17872.5	16607.3	20044.9	13726.6	19015.3	18798.4	15810.8	13288.7	19238.3	17589.4	13049.3	17286.2	14502	16507.2	9439.32	13775.6	9874.59	12298.9	17614.6
NEG	M113T294	112.684	294.066	1282.04	628.292	1237.02	951.77	1252.91	841.869	1239.08	1143.34	1134.16	607.969	1475.41	1416.91	1374.74	643.667	1391.62	1413.77	494.024	365.411	1224.48	1002.51	1562.38	487.728	1360.16	1366.02	749.8	1399.47	1262.36	1336.28	724.124	1968.66	1510.54	355.899	1788.38	1157.55	1274.91	473.414	1179.5	1294.57	1476.94	1494.77	679.058	893.709	1010.75	611.532	791.588	1462.33
NEG	M113T392	112.938	391.521	19296.7	12909.8	6779.78	13646	8830.84	5741.64	8000.74	6627.59	7880.51	3135.23	4619.53	10531.8	11151.8	16548.2	11227.3	12872.1	7515.9	8091.62	6942.52	4911.94	6566.56	6953.09	10430.7	5593	8673.3	4009.91	6053.94	5111.49	5811.06	9840	4505.04	9560.96	6562.82	11812.5	12051.8	18057.2	7431.22	4915.65	9806.13	6022.1	6488.2	11262.6	9752.3	4649.88	13051.5	5201.58
NEG	M113T285	112.937	284.816	696.368	1233.07	194.073	611.275	354.263	295.159	257.735	331.743	384.763	171.548	353.058	706.255	744.634	1105.24	432.774	337.248	451.254	446.469	418.196	249.067	383.965	231.005	507.736	334.039	199.559	205.441	284.482	289.625	292.572	340.716	293.613	651.115	1045.76	512.613	461.87	467.431	301.784	372.755	547.294	293.03	371.535	427.649	406.052	447.643	670.512	216.03
NEG	M113T34	112.954	34.062	136.602	6979.23	4283.84	4446.81	10700	4007.1	519.902	202.393	96.2872	2900.58	57.7278	4985.29	294.479	6933.04	7855.15	4998.85	4683.55	3868.29	5573.25	89.526	58.6827	7571.59	7876.78	5683.58	5951.08	110.642	7068.76	7113.87	5790.79	66.2985	79.4788	5591.68	114.848	6090.17	5804.21	7635.46	245.23	33.7291	6482.62	83.1956	7282.85	2411.91	6021.41	195.602	3933.27	4827.52
NEG	M113T671	112.986	670.992	3992.81	4274.27	3419.04	2657.63	2388.16	2417.22	3258.18	4142.45	3288.84	3367.32	3116.95	2743.86	2659.19	3868.27	3714	3228.22	2381.81	3550.3	3618.94	817.503	4720.56	2782.15	3466.91	5036.8	5961.85	2633.45	6049.78	3111.51	2677.02	3385.55	3209.07	736.988	3995.95	5936.64	1334.61	4169.45	4944.34	3256.28	4983.12	2475.69	3676.31	2723.32	6008.6	4811.44	3787.51	2946.29
NEG	M113T697	112.986	696.74	8650.4	8986.37	6150.67	5411.41	4782.34	4320.08	5496.3	4630.73	5729.46	4383.3	5803.37	878.647	5065.07	5258.86	6861.04	5758.42	4738.34	2652.51	6493	7031.83	5094.19	5168.83	6010.79	7157.32	11178.1	4549.58	5715.36	5686.24	5004.8	2961.62	6193.16	8249.47	6087.2	5752.72	4966.58	7652.11	3018.79	5523.41	5806.86	4500.22	6273.91	4397	6469.04	11343.5	6423.26	5959.53
NEG	M113T713	112.986	713.21	2424.69	2685.56	5504.44	5002.77	4087.66	4141.38	4983.77	2704.82	5728.41	4147.31	4441.4	6595.97	4590.3	2837.07	5821.01	5606.04	4169.57	12175.4	3271.19	13638.3	4353.71	4356.82	5871.89	6137.65	7067.69	3975.71	5411.83	5581.78	4242.52	4623.08	5705.47	810.543	5436.78	6458.23	8273.26	6755.25	6430.27	5039.34	5394.88	4526.58	5715.67	3933.47	5441.34	3901.27	5964.77	5336.04
NEG	M113T10	112.986	9.8815	10752	4612.92	5804.99	5027.89	3183.42	4757.14	4103.38	6491.77	4269.72	3994.32	5614.85	4140.94	4265.42	5809.97	5575	658.527	4266.73	714.765	6122.65	5547.67	3389.75	8199.74	15616.6	3977.94	4086.68	3776.37	4364.29	2160.92	5794.94	11324.8	5714.22	3841.64	836.955	6252.7	5296.26	5622.24	11207.4	12629.2	4688.64	12665.2	5570.06	3971.2	4544.51	6181.12	6267.12	10987.6
NEG	M113T29_2	112.993	28.582	7.06402e+06	8.22703e+06	5.27828e+06	4.9403e+06	7.23782e+06	5.54411e+06	6.2864e+06	6.78804e+06	6.52291e+06	4.49031e+06	5.38807e+06	6.30736e+06	6.80678e+06	8.23717e+06	8.67105e+06	7.86583e+06	6.72802e+06	6.26794e+06	6.68409e+06	7.1352e+06	6.49657e+06	8.80592e+06	7.50746e+06	6.79024e+06	7.84128e+06	6.11035e+06	7137311	7.81582e+06	7.69182e+06	9.53499e+06	7.37924e+06	6.25566e+06	8.98569e+06	7.04014e+06	7.19058e+06	8.90428e+06	6.70343e+06	8.4127e+06	7.82647e+06	6.27134e+06	6.94066e+06	4.48428e+06	6.79168e+06	6.70784e+06	5.84507e+06	7.01018e+06
NEG	M113T77	113	77.336	23222	37474.6	28541.6	20499.4	33632	14581.2	22925.8	16560	30357	18517.4	30796.8	28766.8	17647.1	15036.3	37197.4	35351.8	29457	31706.5	32363.6	28824.4	39952.2	33683.8	36593.5	16532.2	14643	12980.4	31460.1	38726.1	35387.9	41727.7	43608.2	30867.3	43063	30965	28801.5	40115.9	14268.1	13952.7	36500	31721.4	14514.4	17828.3	18839.3	30138.4	31234.6	33984.9
NEG	M113T246	113	245.84	8032.87	889.214	8357.51	7784.59	1860.37	1577.71	1157.3	7868.36	7787.76	1032.34	1720.17	1066.29	2426.03	3126.66	8106.76	15858.6	7742.38	7208.19	1957.3	991.193	16152.7	868.118	8003.07	16158.6	10421.9	7354.94	7365.16	1740.65	7846.68	8858.73	9207.07	7411.46	8009.09	8019.68	9049.92	1626.26	6912.02	8116.32	985.702	10572.4	15121	6640.57	8882.34	9917.2	1635.08	7729.16
NEG	M113T295	113.025	294.53	209155	327337	256428	470422	217834	328388	233849	228661	276366	229038	254144	222932	303307	320956	446448	225231	372437	224483	401860	222546	264637	232757	248753	453906	401360	212286	339465	279287	389064	291846	236777	219954	295070	325832	445238	274628	227282	239129	303814	397775	283582	200046	430836	420294	245046	382900
NEG	M113T206	113.025	205.956	14557.8	12453.7	12610.7	12903.2	13173.8	13682.1	17459.2	17131.3	15519.7	15453.7	17443.2	13725.2	14873.9	16871.5	14278.9	17650.7	15528.5	12675.9	14231.9	14325.7	16388	13098.1	13421.2	28814	25601	12619.1	16060.3	19888.7	14736.9	12623.4	27286.5	13738.7	9209.07	22555.7	13729.2	17187.8	18269.1	25695	14881.3	13092.2	17354.2	13060.1	13892.4	11947	16393.8	14230.8
NEG	M113T121	113.025	120.701	161151	417739	467321	429733	387027	383688	409043	428383	300787	206473	450924	409333	418478	113080	489713	425631	463516	462356	265161	416534	169356	461060	502791	495431	216627	400761	381699	464936	450325	548296	145080	422410	548032	428809	461906	483492	440210	442169	538721	380532	493739	401150	447682	542177	474210	465413
NEG	M113T359	113.036	359.272	22794.4	21385.9	17849.4	21562.7	19790.6	15014.4	18282.6	17250.4	18922	14722.3	20506.8	20378.1	17366.8	21297.4	19624.3	22971.2	15230.9	17096.5	16169.9	17542.7	16965	19018.3	17811	18822	24328.4	11522.3	18639.8	17760.5	24088.8	17203.6	20928.8	18445.2	24643.8	19366.5	19672.9	22229.6	15786.3	21556.4	18700.6	17925	22503.5	17230	23793.1	22357.4	20882.5	17529.1
NEG	M113T162	113.055	161.713	9750.51	5886.62	9187.38	8281.16	7676.38	8099.13	7961.48	8548.36	8610.66	7802.42	8227.2	8933.01	10651.2	12861.6	11618.1	7137.26	9341.78	8290.15	7012.49	9958.32	11339.4	7188.22	8344.91	12422.4	9985.82	5936.72	8528.71	11100.7	10107.2	9338.78	7998.62	8745.11	8368.29	7570.65	11101.5	10057.4	9565.98	9249.44	7399.68	8451.74	8882.56	9317.42	10856.5	15066.5	13723	8912.93
NEG	M113T256	113.073	256.044	5128.26	1527	4198.94	5858.1	1120.44	3528.48	4218.07	3508.37	5320.57	4346.54	3853.34	4600.15	5606.11	7018.68	1895.54	3404.57	1343.8	1162.18	2552.4	3125.21	5527.73	2621.55	4889.85	6192.32	3426.66	3446.99	678.863	2872.23	5602.2	824.886	904.27	2712.6	3428.27	8169.24	8620.52	3418.67	3427.83	4993.85	3541.81	3494.02	11053.9	6845.04	7709.21	11137.2	6454.64	7680.15
NEG	M113T298	113.072	298.397	1748.19	1567.77	1452.87	1348.16	1245.46	1204.09	1562.3	1323.65	1487.15	1455.78	1011.29	1152.68	1450.65	1265.42	1431.96	1415.85	1350.91	1351.85	969.265	1557.74	1587.42	1987.84	1390.1	1119.04	1468.26	1256.87	1624.95	1069.54	1435.87	1154.62	2803.87	955.457	2120.12	1570.13	1496.34	1503.15	1205.1	1456.2	2035.73	1504.68	1285.26	1362.63	1694.08	1597.14	1333.2	1516.04
NEG	M113T102	113.098	102.163	8550.16	7505.39	10947.9	29464	9698.31	14748.5	19163.2	7514.21	17163.5	13397.8	15303.6	12977.3	19804.3	25476.5	19160.4	21714	13253.6	24117.5	8701.84	9364.82	10233.6	5098.99	18721.1	24084.3	19378.6	17730.6	23109.5	12005.6	26891.3	10132.9	6356.84	10314.9	15486.5	29150.1	17130	8745.58	20460.5	38656.1	8478.52	14033.2	7313.06	8132.38	17655	21927.8	16800.2	7520.18
NEG	M113T68	113.098	68.132	10648.8	11759	10549.6	12417.5	9456.61	23898.7	12751.9	10518.1	14667.6	20618.7	9953.64	12952	12407.6	16592.7	20643	16613.7	17810.4	35678.8	7674.52	6492.35	6638.82	8368.28	9393.51	21816.1	17856.8	8266.17	16060	6743.19	37124.6	11010.2	7825.23	11765.5	11098.4	38482.6	25624.1	11155	7976.83	37964.7	7749.77	14754.2	9097.21	10557.5	13890.6	13503	28429.8	6535.04
NEG	M114T296_1	113.712	295.623	766.574	1172.82	990.648	1306.42	1054.73	1216.46	1579.8	745.201	590.56	1207.02	1511.38	867.658	1492.6	2448.79	1630.66	2587.65	750.668	1010.3	997.577	1089.46	1008.98	866.821	1105.61	913.679	1717.79	948.784	747.94	942.293	917.015	1292.84	1152.51	1363.07	1402.05	1105.4	876.8	2507.36	1270.16	1503.1	683.537	1105.47	1271.76	1105.82	1597.51	1772.37	1902.13	1318.58
NEG	M114T700	113.926	699.709	9690.14	2567.53	2781.99	2136.38	2579.34	2107.87	2759.3	2574.49	3098.81	2072.11	1876.9	2518.16	1542.63	2795.33	3045.01	3936.73	2177.59	1770.88	2162.61	4467.68	2438.64	2553.35	2918.65	2479.11	2740.7	2495.53	2535.95	2523.01	2021.99	2973.03	3179.58	2156.33	2847.52	2788.79	2775.38	1218.39	1770.29	2935.82	4518.29	2715.26	2103.09	2259.64	2178.65	2921.95	4675.77	2939.53
NEG	M114T281	113.943	281.011	1112.7	1866.77	989.42	1341.62	1580.76	1399.33	1098.02	1531.44	1240.72	1134.45	2081.48	1781.15	2887.41	3005.72	2398.74	3155.96	2364.28	1874.67	2121.73	2408.82	2286.89	2191.4	3179.13	2190.7	1974.01	1609.96	2122.95	2629.43	3617.05	2515.48	2091.39	1709.19	1034.51	2185.46	2678.52	3064.66	2260.28	2146.25	2104.22	2318.77	1939.82	2191.36	2828.64	2114.95	2149.81	1820.7
NEG	M114T407	113.944	406.573	914.594	956.705	1273.32	1142.59	1359.92	836.428	861.047	1191.81	1159.04	679.97	1376.19	863.73	1007.22	1231.21	1212.24	1087.33	1116.3	1071.08	1121.25	719.308	1397.62	1001.74	892.259	1397.02	1074.19	918.878	897.048	858.583	1000.74	1041.99	1124.7	1066.09	984.213	1011.97	987.253	1223.84	988.061	1279.9	762.391	937.677	1045.98	952.568	1122.62	1234.72	1500.27	1008.02
NEG	M114T78	113.944	78.46	12020.9	9802.35	6921.38	6088.3	6831.04	8388.87	5496.61	9604.33	11196.5	8816.75	8826.71	9682.69	9236.78	11979.3	11830.7	11121.1	9812.55	9271.23	8882.82	10735.2	6561.4	8981.45	10039.9	9381.06	8836.35	10025.4	9968.28	10580.4	10140.8	10984.5	12822.5	9610.24	10736.6	10254.9	10159.1	11254.5	10498.7	10328.9	10546.5	8897.29	10633.1	10156.9	11440.4	11595.8	12091.8	9328.24
NEG	M114T23	113.95	22.5175	5525.93	2684.25	4086.35	27962.5	5935.04	2847.49	7354.29	5643.91	3431.35	10727.7	4714.14	1697.71	2275.02	6720.7	4434.85	14224.5	9035.23	8582.62	4839.85	7065.18	8542.84	7940.49	15546.4	9244.93	6093.99	2779.44	2310.27	9435.69	16328.5	7081.28	5392.08	10421.9	2625.55	87027.5	57619.1	6632.47	5594.89	3314.79	6260.99	4252.29	31932.2	3198.61	5350.82	3070.94	8436.47	49576.2
NEG	M114T29	113.996	28.582	120589	89979.5	102938	97913.7	127476	114678	102218	112124	109295	78605.9	89725.4	108549	113289	89607.8	145361	125976	109044	121346	97662	90665.1	103206	132721	122670	109845	122757	118556	115559	120184	121355	147167	109823	116579	160326	117189	111069	108413	128522	138297	120539	110295	113925	82285.7	134399	110493	103004	116063
NEG	M114T351	113.994	350.923	4526.92	4954.49	4663.03	2586.43	8639.03	3968.87	2865.24	5735.24	4727.01	12768.7	3147.5	5802.58	14519	6942.62	4771.73	18726.3	4833.21	7179.99	3026.58	2239.22	13730	4014.71	6535.55	7422.96	5878.15	3057.67	5584.63	6698.55	16439.3	5464.69	4375.98	4380.67	3709.3	12521.5	16867.2	19398.6	5257.91	6177.42	2778.98	3454.66	4253.99	3002.28	4738.34	17080.3	4192.12	16749.7
NEG	M114T236	113.996	236.058	717.446	621.432	431.447	1066.58	438.54	717.598	405.568	399.883	782.929	693.013	783.528	773.51	589.123	624.594	551.276	323.21	766.221	417.667	519.973	350.368	507.493	589.861	588.861	419.065	885.679	337.534	752.04	460.346	975.731	502.643	924.324	815.078	542.95	865.161	352.13	453.625	886.99	390.932	464.792	858.458	1251.79	898.97	972.898	577.651	605.951	401.721
NEG	M114T42	114.02	41.693	337915	15560.3	192315	296960	17545.2	120881	194903	136090	193676	209774	78273.2	106182	177367	287591	5872.1	58136.9	40482.1	34212.6	73448.5	48989.8	123121	40932	57008.8	403980	118173	149535	2891.25	45648.7	101022	6434.56	6894.69	73597	77714.7	620433	302769	35828.2	209684	188627	54996.8	68745.4	334373	242901	278683	412071	249397	301208
NEG	M114T346	114.018	345.664	3765.22	5173.65	2843.65	5577.1	3444.98	3063.59	4328.66	3169.81	4486.02	4374.98	5329.28	6332.2	5004.61	7300.74	7204.96	5489.25	4083.5	3292.7	3163.08	3561.15	2955.75	4118.21	3287.99	3364.57	6536.54	2828.4	5678.61	5089.53	5664.76	5476.83	4542.33	5636.96	5807.22	3496.68	6486.24	6484.39	3930.59	7670.3	4392.08	2888.74	4551.71	3665.78	4492.55	5965.69	6102.42	5762.02
NEG	M114T359_1	114.02	358.797	10609.7	11063.3	9731.58	11754.6	11180.5	6491.97	9484.93	8807.81	10044.7	8819.19	11101.7	11743.9	8877.28	10182.8	10534.4	13712	8971.97	9078.19	9155.54	8749.02	9465.94	9830.15	9494.25	9525.92	12305.2	6602.47	9873.08	9282.45	12377.1	8908.8	10751.1	11886.9	12363.8	9005.83	11497.9	10551.6	8077.71	11311.9	10842.3	9464.18	10400	8963.25	11896.5	18719	10585.7	10553.6
NEG	M114T224	114.025	224.356	6801.06	8228.32	8777.08	8903.19	9614.88	7162.96	9087.27	7336.42	7452.8	7537.09	7229.42	7037.85	8806.89	8740.27	7739.64	10083.4	7680.7	6755.42	8425.78	8319.49	14053.2	6049.34	7753.16	10202.3	9108.28	8105.98	8028.43	9344.68	8649.79	6484.06	9382.53	6843.27	8246.15	6985.67	8569.08	8778.2	6992.19	7897.72	9264.43	8392.05	9518.98	7772.07	7996.96	9069.33	7149.87	7166.72
NEG	M114T288	114.028	288.376	13853.5	15524.9	17514.9	17501	10964.3	11916	14232.4	13296.7	15007.4	12469.7	15291.7	12445.5	18342.2	18667	14340.3	11356.2	12243.9	13181.8	16806.5	13365.1	17426.6	13875.7	16007.4	13582.4	12924	13912.4	12770.7	20894.6	12726.2	18603.4	16530.6	13723.2	13495.3	13926.8	13590.5	15375.6	10855.9	12743.1	17812.9	15142.9	18568.1	14497.4	16172.9	15780.5	15063.5	12593.9
NEG	M114T174	114.031	174.355	69778.9	33390.9	74614.3	76681.4	27234.1	48396.5	51722.7	48905.5	79583.9	44167.7	41738.2	40253.7	55447.8	80247.3	31795.4	38734.6	31565.3	32397.3	27209.7	33269.2	51310.6	32621.1	43990.1	58718.2	59011.8	44353.5	20364.2	31276.4	43541.5	22353.9	26028.4	39811.1	24281.6	78151.5	74082.6	39779	45509.7	61646.4	41561.2	31163.8	76061.7	50166.1	73314	126161	82416.7	74907.1
NEG	M114T359_2	114.039	359.406	1142.55	1267.18	842.355	1075.9	918.031	6401.52	10347.1	9008.66	810.602	8945.12	10876.4	1403.46	10620.9	13333.2	620.024	556.918	805.275	8833.15	8507.1	9701.93	9501.88	9311.22	11799.6	9491.84	12670.3	6868.76	10009.9	10141.2	1142.17	643.246	842.757	16478.5	11713	8991.98	694.095	733.89	10898.2	972.422	1026.59	883.942	16492.2	7914.09	1085.6	952.989	15752.1	2303.12
NEG	M114T296_2	114.057	295.538	328909	369234	429628	373967	356181	388754	383892	282202	287317	338715	411438	443397	389870	602340	427302	969694	417181	304338	328997	347957	288081	220924	363427	438249	502046	265351	378481	280312	364765	328759	415578	421567	456404	277068	384687	715796	441299	533372	446422	299727	367669	293044	411803	522029	434355	466073
NEG	M114T218	114.056	218.474	7415.13	2166.43	6681.14	4978.16	2121.76	6182.84	7749.43	4111.79	5872.65	5133.89	9089.93	5558.73	7581.14	7210.64	2282.79	6812.68	3528.06	2264.9	2735.43	3162.4	5330.24	2504.52	4390.54	9496.91	5389.85	5527.56	1707.02	2715.84	4031.86	1176.65	1130.97	8017.96	3500.05	8114.48	8437.18	4496.07	6232.79	9440.77	3987.86	2557.63	7047.49	7016.16	8414.78	12819.1	7485.77	9913.71
NEG	M114T134	114.056	133.811	10406.6	3732.14	7846.18	9173.76	8391.23	976.848	6101.29	15054.5	7727.77	6894.33	10643.6	9414.57	11600.7	11169.2	14220.2	29410	9017.88	5345.48	4880.49	10447.5	10652.7	6225	13135.8	8466.09	9617.34	7622.59	5659.16	10654.8	13761.6	7354.66	12206.6	7294.85	9921.01	12285.1	15808.3	15125.6	21837.6	13963.2	11456.7	5810.02	17144.7	9113.82	14163.1	13442	8753.91	8355.92
NEG	M114T254	114.056	254.373	4012.64	1337.53	4423.46	4262.95	1365.06	3576.87	5151.38	2555.58	4558.18	3474.13	3757.09	3875.64	4630.36	4451.72	2005.76	4042.15	1952.1	1970.5	1671.61	2242.95	2623.47	1902.93	3341.63	7658.62	3360.96	3688.38	1637.93	2200.52	3690.29	1452.42	1399.22	2746.56	3311.26	6488.59	12595.8	3138.06	3829.3	4732.66	2640.87	1970.16	9734.64	6801.41	5476.28	7603.2	6518.86	8056.4
NEG	M114T201	114.056	200.985	4093.56	1672.27	5537.05	4186.8	1617.33	4478.6	5537.92	2620.02	5027.8	3659.83	3343.58	3987.44	5474.82	4944.3	2091.72	4636.23	2140.41	1659.13	1685.21	1982.24	2425.49	1382.63	3420.84	6834.74	2866.16	2781.02	1565.96	1527.6	3318.33	1292.26	705.884	2648.36	3331.24	6135.01	6993.46	3401.47	3401.38	4919.2	2172.7	1876.5	6587.56	5020.59	6839.99	9193.34	6751.39	7473.32
NEG	M114T189	114.093	188.992	1807.68	888.907	2334.09	1418.52	858.351	1084.12	1052.86	1104.62	1239.43	996.843	868.065	1990.08	1428.41	940.531	774.56	956.851	577.641	705.578	827.512	1136.9	931.969	1114.58	920.726	1442.31	569.305	906.023	393.011	1134.36	1104.82	711.411	392.948	950.987	1268.41	1989.61	1192.69	599.531	799.314	1821.77	585.852	607.853	1375.36	1158.59	1527.22	1974.42	1653.76	1313.56
NEG	M115T332	114.634	332.376	1868.34	929.672	1449.01	1108.29	1176.35	2031.79	969.255	1724.18	837.075	1124.21	1826.21	2073.76	1358.56	1462.83	2337.01	911.795	560.635	1401.68	1840.08	1045.92	2067.89	1044.41	1866.44	2108.74	941.632	1643.21	1902.5	1883.73	1673.09	2204.09	1570.25	1412.33	1035.48	1495.78	2080.87	2252.23	988.309	1131.74	1141.45	1927.34	714.574	576.281	782.199	2157.15	1452.07	1739.68
NEG	M115T609	114.935	609.088	35861.3	33368.8	23197.5	25356.5	29068.1	25961.7	25539.2	33850.7	22189.6	27232.1	25893	28656	40750.6	24773.7	20634.6	21568.1	22053.7	29481.2	29800.2	21103.3	19504.1	31099.5	23692.4	13184.7	22105.9	22572.9	26407.2	25514.8	25049.3	19710.4	21637.1	28274	23426.5	19571.4	20085.2	22724.3	33089.4	22484.6	8098.56	24733.3	13796.3	27291.3	23398.8	39091.5	22723.3	16269.2
NEG	M115T710	114.934	710.406	41900.6	28531.2	29922.1	9232.9	9339.69	10020.2	42942	28111.5	12511.8	25716.5	14396.9	26480	24835.7	37233.8	30963.4	4368.85	19036.1	26309.2	27216.9	1447.03	13582.1	43963.6	10438.4	30090.3	27767.5	27157.2	26671.9	30005.7	29789.7	30250.6	10420.7	16175.1	32241.5	29442.1	28508.5	29363.4	26065.9	30458.5	52505.9	26854.1	29268.3	26894	42898.5	38616.9	30277.5	30711.3
NEG	M115T673	114.935	673.476	2735.61	11679.5	28588.5	11746	11085.3	10615.2	8453.98	11578.3	12337.5	11308.2	12022	11569.8	7567.4	12337.8	12378.6	12201.3	11048.3	10689.8	10464	11371.3	12407.7	18285.6	13060.2	12704.4	12185	11453.5	8713.54	11953.2	12460.8	8406.93	12334.7	1013.34	13380	12147.6	12605.8	12489.2	8867.87	12197.2	11717.6	23860.9	12347.5	11274.2	12327.3	11466.4	12608.8	11557.3
NEG	M115T651	114.935	651.217	11077.1	10867.1	10518	9765.75	9661.86	9972.81	8936.03	9782.49	9753.52	8823.41	8827.59	9387.85	13063	9703.86	9976.78	9165.55	14029.4	9370.87	9911.88	9606.73	8775.66	6359.27	11021	7480.2	9828.6	9508.22	7052.28	9857.5	10225.6	8782.77	12916.2	9115.4	9602.89	8298.22	10114.5	12806.5	9029.99	2198.65	9813.48	12470.1	9919.24	10135.7	9578.69	23407	10878.7	9865.55
NEG	M115T29	114.943	29.4125	38619.1	4037.26	15891.3	11615.8	2911.82	14355.3	20642.3	7540.28	78200.7	14953.8	1970.19	5027.06	8664.43	5565.77	3038.19	5746.12	2679.98	3537.18	1756.45	3357.49	1283.24	3703.62	2526.06	12427.5	3990.46	6336.65	2244.63	2377.21	3825.75	2330.58	1428.47	3280.17	2429.09	46373.3	44886.4	2077.75	8445.77	6956.64	3940.65	3100.17	23719.1	37667.2	35286.8	51539	61374.6	41088.1
NEG	M115T359	114.965	359.012	2758.3	955.028	329.534	2050.9	1182.64	573.638	2197.59	777.932	524.995	514.067	2739.75	2742.91	1817.19	2290.46	3163.73	462.288	2393.52	460.596	2140.39	2270.16	2919.66	2254.07	2566.65	460.841	2567.25	2333.31	2706.58	446.36	3138.54	506.438	2267.89	2261.57	1139.08	2649.36	2818.93	2870.16	2614.25	1919.58	2762.83	2624.3	3168.2	1868.21	3489.07	3272.24	2314.07	2735.69
NEG	M115T333	114.981	332.503	440667	176363	420713	412755	398216	426033	417797	411834	433056	349033	416200	440421	422667	446847	465245	470949	418438	420890	420633	424532	437034	427081	449715	476341	434617	412492	424970	509029	459052	556317	426454	418313	192002	423277	428548	616484	457263	416489	416788	437822	507990	422814	593778	530135	440755	426414
NEG	M115T28	114.997	28.073	21845.8	23735	19167.9	14765.4	19799.6	19601.6	17614	22685.8	17738.4	14754.1	17310.5	21427.2	17622.6	21882.6	27248	27153.3	21017.8	22258.1	19416.7	17595.4	19393.6	20763.5	24228.6	18954.2	24102.5	18942.5	20863.2	27349.1	24401.1	27730.2	30196.4	20530.2	24494.2	16936.5	22033.9	26937.8	14336.8	24404.4	25825	508935	18961.8	14796.2	25536.1	18729	18697.1	25791.2
NEG	M115T385	115.004	384.93	37118.4	21366.1	38254.4	49994.5	49925	39527.9	46680	30028.4	43542.3	31650.1	48916.9	47967.8	53437.9	72266.6	67363.2	70939.9	39922.4	45402.7	43748.9	44351	61441.2	33420.7	56339.7	67915.4	55327.2	33146.9	45028.6	58330.5	52136.1	57424.2	39930.4	41606.2	24132.1	43300.7	57534.7	70907.3	46119.5	58592.5	47019.6	43346.5	42690.8	38792.4	57696.2	47426.2	53546.6	37320.1
NEG	M115T412	115.004	412.013	15727.7	10318.2	15640.9	18470.3	19776.4	16966.6	18638.4	13099.6	16962.2	10786.5	12601	20636.3	23975.8	26843.7	22055.4	23572.4	19944.4	8453.07	21870.6	20558.8	26263	15159.3	22160.6	11377.9	21831.8	18107.6	21197.5	24000.6	19003.5	20624.1	17390.9	20093.3	10999.3	18293.5	20661.6	24547.3	18992	23967.3	7578.54	20977.8	19710.7	18733.5	20305.9	20612.9	12076.7	10221.3
NEG	M115T92	115.016	91.906	155203	245859	4152.49	357338	5851.12	2318.7	222702	3313.26	156591	273631	2563.82	1732.5	3619.47	2521.63	340882	278587	239642	1557.1	592.549	3016.97	367963	147550	1648.55	6262.94	312497	3267.62	203598	384966	1922.24	472304	630.144	2421.6	236936	2865.04	151979	283843	2070.17	171547	236043	1835.82	274267	2311.83	267901	5823.29	167055	187322
NEG	M115T224	115.021	224.323	28827.7	29834.8	31674.9	31972.1	38069.7	30712.4	36369.6	28325.5	28637.8	28320.9	27826.8	30403.5	33034.9	33270.4	27259.8	38519.8	30177.2	25018.9	32517.2	30800.1	45802.8	22787.6	28757	37590.5	33348	31149.8	27632.4	38407.9	32299.8	26094.2	33562.1	31031.5	29969.7	26600.8	29517.3	34981.9	30955.9	27768.2	32529.9	29950.2	37003.1	29302	30916.1	32005.8	26262	26086.1
NEG	M115T42	115.022	41.675	8235.99	60184.4	4549.83	6088.3	29144.4	148975	3413.24	186592	5849.64	183626	102221	92363	180893	6427.28	18260.7	60647.2	48689.9	44066.2	78666	83514.5	4256.5	60320	67107.8	15451	92425.8	165896	5092.05	52872.3	92806	12715	791281	85385.2	232604	24686.9	12325.8	48688.8	4074.71	135015	350799	67556.3	9760.74	184722	8537.94	13474.7	4136.18	7339.04
NEG	M115T295_1	115.029	294.53	745.064	833.941	5686.57	4136.05	1036.86	689.729	1098.51	4443.15	1006.65	919.105	3511.22	1078.68	1277.42	828.437	591.336	4058.82	628.533	3632.02	3145.73	1461.21	1434	599.374	1311.67	4230.77	377.985	4689	1621.27	835.392	1678.49	5220.4	1181.56	1456.39	1650.5	4215.24	96.4031	822.467	885.273	4427.26	2371.38	3849.16	5860.41	4953.52	923.882	4251.63	3968.86	1140.62
NEG	M115T77	115.041	76.691	1.15368e+06	1.80024e+06	1.48637e+06	2.56614e+06	4.21517e+06	1.94207e+06	1.52867e+06	1.63114e+06	982518	1.61913e+06	2.53022e+06	1.52224e+06	2.54841e+06	2.09899e+06	2.14441e+06	2.12215e+06	1.81141e+06	1.6786e+06	2.80694e+06	2.03756e+06	1.44108e+06	1.3967e+06	2.14117e+06	1.75072e+06	2.42059e+06	1.86617e+06	1.5425e+06	3.81874e+06	1.99205e+06	4.11762e+06	1.09719e+06	1.47042e+06	2.06267e+06	682308	1.02162e+06	2.49174e+06	1.04482e+06	1.43866e+06	2.50297e+06	1.95629e+06	2.12291e+06	968678	3.39229e+06	591830	985208	892532
NEG	M115T33	115.041	32.634	2.27861e+06	693270	1.98636e+06	2.66781e+06	267508	1.50913e+06	3.1119e+06	1.8504e+06	1.79985e+06	1.553e+06	2.02038e+06	1.51687e+06	1.14789e+06	1.56255e+06	301029	497997	763121	542619	864769	711314	1.95292e+06	688685	987455	3.34656e+06	1.02208e+06	1.58379e+06	94394.2	807084	1.35973e+06	184458	840464	750223	937634	3.45153e+06	4.26824e+06	442051	941549	1.64022e+06	711450	804141	2.70107e+06	2.67889e+06	2.57496e+06	2.38545e+06	2.60851e+06	2.44907e+06
NEG	M115T61	115.041	60.606	514378	1.64784e+06	949222	1.34414e+06	1.80939e+06	1.61647e+06	1.30875e+06	1.12354e+06	814522	1.48398e+06	2.0799e+06	1.05385e+06	1.56255e+06	1.50834e+06	1.87728e+06	1.77232e+06	1.47616e+06	1.32367e+06	2.34573e+06	1.96995e+06	1.69439e+06	1.36488e+06	2.129e+06	1.49112e+06	2.11314e+06	1.78103e+06	1.51484e+06	3.20093e+06	1.99809e+06	3.76051e+06	1.87266e+06	986327	2.00653e+06	592848	915328	1.80495e+06	499395	1.31706e+06	742269	1.84263e+06	1.96012e+06	765254	1.49269e+06	479513	770138	841683
NEG	M115T311	115.041	310.784	5844.16	4052.3	24502	7638.39	18759	11652.3	8052.2	19324.2	8274.26	4007.79	7608.9	6030.58	10560.4	1257.77	10687.7	13115.9	7343.15	15862.5	19589.9	7347.76	17408.7	4726.29	6629.28	23291.3	10168.1	13872.8	6660.11	13472.4	6830.67	8170.84	8867.6	7303.65	610.932	6233.04	7001.97	10470.5	4314.07	17510.8	6111.54	11878.7	14255.5	7559.66	10014.2	16039.3	17161.5	4931.38
NEG	M115T296	115.06	295.553	20265.1	20869.9	22514	22421.8	20141.5	19908	21375.6	15004	16369.4	19592.6	22289.9	24610.7	23143.1	34502.1	22733	47357.8	25550.7	16142.6	17969	19078	16812.4	12288.7	18419.1	24579.3	26331.2	15081.5	21134.3	15840.7	20117.5	18827	22282.3	24163	25513.7	16667.5	20609.9	37813.6	24987.9	29845	25872.2	18076.2	21273.7	17512	19626.3	28275.1	23937.2	26053.1
NEG	M115T86	115.077	85.666	104848	90919.5	145929	70716.7	33387.4	68277	126285	77211.3	204567	67621.6	86782.9	142021	55599.2	70588.1	111205	84461.1	75907.3	65749.9	39955.1	94994.7	35393.5	92586.3	142945	81767.6	49369.1	57646.3	127619	82497.4	74705.9	81728.2	160470	147035	187827	186879	138537	98880.1	69140.4	107682	115410	48356.3	77232.4	68628.8	100589	198860	198339	111453
NEG	M115T295_2	115.077	295.067	15730.9	19644.1	37174	24299.1	17984.3	20170.5	16706.9	17925.3	20187.5	26041.8	19675.8	19702.8	19312.4	25995.1	17045.7	15261.1	5650.4	47861.7	17722.2	15813.8	15462.6	14287	21434.8	24119.2	34571.1	17054.9	15191	19613.8	21029.7	16486.9	23625.2	18368.5	20627.4	14313.4	17667.8	18698.1	16555.9	23117	19220.9	14920.9	17907	16009.7	21837.8	24263.5	16864.3	22036
NEG	M115T15	115.077	14.722	41854.9	33176.7	35118.8	29765.5	21407.9	23370.1	45024	30626.3	40889.5	16734	34386.8	25813.2	18992.2	37275.2	9442.84	33481.3	12714.4	24120	14663.8	8341.87	22153.8	34535.3	27147.2	46895.5	33488.1	8659.09	16900.2	26026.5	36155.8	35548	27602.5	25070.1	37222.4	48174.5	36681.8	10519.2	27243.8	31130	38076.9	30221.2	40247.9	10540.2	29849.3	37329.2	43648.6	35589.3
NEG	M116T284_1	115.722	283.83	2310.12	1661.66	3059.92	3004.29	2461.46	2314.42	1869.22	2046.56	1676.81	2472.59	2493.57	1759.66	3003.73	2406.82	1907.28	3165.51	1766.55	1700.92	2294.51	1675.31	1526.52	1477.7	2000.59	1833.47	1656.16	1592.88	1839.95	1999.71	2370.01	3142.87	2495.44	2085.27	2855.5	1778.09	2532.04	2484.31	1848.31	2029.3	2345.23	1762.41	2620.01	2347.07	3306.31	2643.94	2589.16	2505.76
NEG	M116T677	115.921	676.728	61773.3	74486.8	77677.1	42819.7	69594.1	109197	41133.1	84223.1	60581.9	129615	37809.5	43470.5	20781	65427	37071.7	47712.7	44034.1	121191	37877.6	63442.3	230958	49445.4	54389.1	46024.1	25439	48450.9	79974.3	93767	108560	127931	162439	46320.3	49520.6	53515.6	52707.9	52059.1	55455.4	66731.1	13502.4	38478.8	50246.7	50142.1	54279	92944.6	76563	35776.6
NEG	M116T641	115.921	640.854	26876.9	90012.4	48487.6	40378.3	36356.1	62915.6	6026.06	41857	41853.9	28033.9	46294.6	32787.6	34647.6	72886.8	14649	54015.1	34714.6	20331.8	44274.1	92799.8	35575.8	44314.9	127930	43498.4	143625	34861.2	13470.6	44564.5	38129	28728	57060.2	23631.7	12742.2	24102.5	32300.1	54927.6	27008.5	37872.5	135377	3986	51721.6	44655.7	80100	93348.3	57411.9	30992.1
NEG	M116T714	115.921	713.847	89437.7	38634.6	18822.7	39731.2	254913	303221	78134.1	153608	81427.4	38936.5	252383	39944.9	30655.6	55234.9	31020.4	123506	31618.7	22231.6	30695.3	274272	23187.6	69830.3	195211	58841.3	74079.4	45195.7	38235	43429.7	21868.4	15872.8	273597	22492.2	74778.1	47766.2	54802.9	91771.1	239468	26801.8	59412.7	70268	51513.3	9682.32	57419.6	102477	76353	48343.4
NEG	M116T618	115.921	617.74	4433.93	155762	190627	224154	33086.8	144638	184294	177088	25180.2	30720.2	188009	16491.3	106016	36099.3	4474.98	6425.6	104931	144337	146880	31151.6	82514.4	76796.1	4702.7	4290.48	245706	3841.62	97142.4	4574.42	4460.68	52516.5	74614.4	24500.5	4750.03	78768.6	176246	72216.3	24139.1	144965	118980	94158	205092	185586	3995.23	5216.53	267377	182693
NEG	M116T35	115.922	35.247	144393	18252.9	165359	146035	25389.1	77041.3	134991	60263.7	19918.1	83157.2	142191	147994	14743.6	92985.1	168225	121830	72599.6	61994.6	67025.1	95386.9	50652.1	35976.1	133164	116444	96914.6	89432.4	70891.9	94884.5	93328.4	142159	9360.13	117166	171025	148750	104833	106008	12930.8	91004.4	141674	142895	19917.6	81950.4	79145	116014	130361	102430
NEG	M116T67	115.921	66.891	219936	576015	254119	169201	310380	135795	534861	362497	242439	208704	153006	354854	331316	264877	416370	173335	322238	230025	384308	621828	226809	324117	137252	467654	596291	197890	519904	583385	208356	232951	500565	155822	301137	304538	375643	297508	292716	563361	377720	378178	470499	341960	520933	380224	313105	212761
NEG	M116T21	115.926	20.679	12440.4	14991.2	22819.3	24925.3	10795.1	15185.1	16475.7	9842.06	19718.4	15715.6	16442.4	15306.2	21603.1	19573	141493	28871.7	15166.8	17433.8	12567.3	18520.6	21432.1	45698.4	129978	15395	12934	17524.2	20890.9	140506	147698	145135	148588	11704.7	23117.6	5066.61	122890	24201.1	30235.6	25672.4	146228	17946	16068.5	19516.1	137286	133963	138964	16710.5
NEG	M116T126	115.921	126.186	152595	19792.1	47919.8	190381	58576.2	114104	185299	178379	159214	161380	122257	197881	62086.1	154370	190318	103197	237317	247800	110963	132513	147708	201413	12275.4	164604	157604	146370	16395.9	230204	92121.9	162655	194584	23371.8	162648	200304	106103	160412	16253	145379	94810	181263	204691	199753	28960.4	177700	171226	188368
NEG	M116T242	115.945	241.89	1615.77	473.804	868.41	1476.35	880.652	1033.8	1732.95	827.491	788.828	1059.63	1881.03	1179.21	978.534	1702.85	935.626	1383.58	1062.39	714.769	1023.56	1979.72	534.962	920.804	732.58	1736.38	1106.08	1179.67	1209.36	3316.34	927.809	1945.84	1701.95	1391.53	1507.3	2015.24	1496.13	1510.48	1975.14	2167.59	1246.14	1191.51	1071.73	673.936	1510.05	1614.33	1564.49	1205.08
NEG	M116T103_1	115.945	103.481	48003.3	1596.73	4068.95	2451.16	1726.58	2089.13	49522.4	1396.26	2776.99	2045.99	2080.78	44656.1	1803.05	2845.85	2172.95	4842.58	1474.14	2321.16	1438.16	1657.14	1990.8	50495.8	1890.51	3113.41	1050.96	3295.16	45525.3	4201.79	1637.88	3064.81	5506.99	1888.55	4734.92	2841.09	2057.26	1493.36	2148.18	4553.83	3452.25	2075.85	3111.27	1366.23	2901.87	5539.25	2654.91	1527.34
NEG	M116T333	115.984	332.617	11146.7	4739.29	10643.3	10805.7	10260.3	10855.6	9895.97	10098.4	10998.6	8202.95	10282.5	11086.3	10482	12567.5	12130.4	12743.9	11062.1	9717.99	10740.2	10194.8	11391.3	9270.37	11551	11969.5	10367.3	10849.8	10855.2	13449.7	12269.3	14875.9	10766.9	11324.6	5021.4	10954.5	11257.6	14334.3	11823.4	10587.5	10739.3	10802.4	12923.7	11231.4	15733	13834.9	11690.9	10077.6
NEG	M116T138	116	138.082	9832.91	10555.3	19562.1	10644.9	8859.22	9404.52	9326.83	10278.7	21620.4	10217.9	11217.3	6995.56	10653.3	7416.77	16598.6	7362.95	5908.97	7067.22	9102.78	10320.7	5385.9	12472	15675.2	13454.3	9831.4	4189.54	9747.52	8669.53	7544.58	6608.73	3478.9	8497.38	15090.8	11704.3	12522.3	3918.02	9992.26	11773.1	11959.2	3582.57	9744.36	10181.2	9382.87	11890.3	16812	21117.9
NEG	M116T385	116.007	385.048	1265.53	2588.35	1392.97	1813.57	1832.72	1588.45	1537.25	865.395	1579.24	1902.39	1739.83	1702.34	2224.94	2931.12	2370.29	2484.4	1377.25	1955.32	1879.95	1559.2	2365.3	2091.89	2090.75	2732.25	1824.71	1527.21	1717.74	2186.5	2102.85	2249.84	1718.84	1531.87	656.115	1719.34	2211.21	2891.16	740.922	1720.47	1587.25	1538.61	1563.18	1614.63	1928.06	1966.3	1570.27	1455.22
NEG	M116T240	116.018	239.891	60.375	564.103	3745.67	2673.08	668.935	44.6845	41.2641	267.941	4364	958.613	117.829	1269.68	4376.33	3450.25	2955.57	1447.54	734.812	711.994	709.737	663.146	4989.11	617.512	3504.2	3196.03	161.246	838.369	247.114	1393.02	5626.32	244.932	68.7192	806.442	129.242	63.31	3561.97	1040.24	1084.41	3712.34	31.4976	405.569	3215.13	4855.98	3058.98	352.156	3758.74	3261.7
NEG	M116T33_1	116.025	33.274	121412	31471.5	7781.57	7385.83	12074.6	76654.2	155450	85087	12877.1	101325	4787.45	38773	101196	5733.8	6792.57	2335.93	33416.3	27940.5	36250.2	33664.3	58939.8	26455.1	3556.42	11723.9	46925.1	97622.1	1072.12	1441.16	4796.46	6335.88	2548.37	38257.2	49036.4	14914	11166.7	2539.08	4791.69	5398.19	38179	33588.5	130342	9009.33	10610.4	16980	11339.6	105317
NEG	M116T224	116.025	224.36	1715.81	2040.97	918.485	475.992	3586.45	1763.86	1438.02	635.13	2988.41	1785.1	2781.61	2156.78	1908.2	3432.75	845.312	2220.22	1092.76	1753.34	1933.37	1083.19	2876.63	1132.11	1071.38	940.152	3018.11	1232.46	1486.5	730.088	2720.92	1676.09	1380.83	1124.28	1130.55	3295.94	946.058	2355.54	1549.54	944.289	2403.1	955.059	4092.44	3021.2	3706.51	3959.96	3059.6	3373.12
NEG	M116T372	116.036	372.356	69451	27895	82376.3	50162.5	74839.6	57155	57359	75621.8	126141	24365.9	63211.2	80907.6	70602.2	45813	141601	63519	69849.5	64829.7	45278.4	61067.6	41953.4	28925.5	45881.7	64362	55182.5	38067.8	59893.3	69263.9	55903.4	61340.1	63320.3	87648.2	17202.3	40175.6	72069.7	70252.1	43654	59518.2	53093.8	39361.3	63653.7	54097.3	63075.6	95832.6	86672.3	40665.4
NEG	M116T243	116.036	243.002	51962.7	14415.2	40758	33137.8	12495.1	33948.1	38488.8	28629.3	48968.4	28265.2	30867	35342.2	49261.6	48748.2	14822.5	28070.3	15816.7	16231.3	22853.1	23271.6	28806	15247.6	31227.2	64055.3	29770	26821.6	5886.11	18613.6	33399.3	5786.3	8908.57	24926.3	24595.9	59461.6	72161.8	20929	35004.1	41178.2	21196.8	12688.7	71297.3	51529.3	65732.3	77115	50745.8	67728.6
NEG	M116T268	116.036	267.808	21768.1	14538.4	20187.1	25292.3	21117.4	19458.5	21677.1	16710.4	33606.5	22706.2	20848.5	17537.6	22796.2	36313.6	31785.8	21813.9	22645.1	19381.4	16052.8	23641	25957.7	22748.4	21594.1	28186.5	28730.6	18997.1	46508.5	57211.1	28185.7	38388.5	34278.6	19039.6	19682.9	20819	29528.9	24310.2	16311.3	27638.9	17576.8	18523.8	23105.2	22629	25017.3	32650.7	41042.6	24666.2
NEG	M116T292	116.036	291.702	10388.9	11292.8	6849.49	8727.54	11070.5	8105.2	9404.16	11451	12979.1	11693.3	8946.68	11455.4	9641.8	12094.9	10306.8	9934.95	11367	11351.5	12750.6	11480.4	9041.29	8664.28	13749.3	10107.3	11434.7	10984.3	11940.3	10248.5	11357.1	14268.5	9257.59	10231.3	14430.8	9950.08	11106.4	9815.16	9621.47	10328.3	13757.6	9765.67	10511.2	10415.9	9619.79	8810.33	12354.4	11420.8
NEG	M116T22	116.032	21.7405	83253.7	9093.87	66382	67141.4	3735.4	31361.9	43745.5	37591.5	87507.3	30901.3	28154.5	18117.8	52125.9	33696.6	3994.4	20482.2	8553.34	7755.23	9871.75	10011.7	19172	2187.42	20684.1	61347	19748.2	25457.8	787.294	14348.7	16189.8	1114.95	660.123	16089.2	16384	127532	65929.1	16155.7	33492.6	45644	15290.7	2350.07	66478.2	63842.9	88935.3	144807	88836.6	83599.9
NEG	M116T61	116.044	60.5785	30195.9	88915.4	54129	76538.8	117613	88339.6	70930	68382.6	50018.3	92415.3	112978	70382.8	99167.9	87952.6	111381	97331	80705.2	77637.2	144529	112326	104185	77509.8	121909	95647.2	122631	100482	91819.7	186227	107528	218006	130786	65633.5	114558	36753	54149.4	105559	35311.6	79385.2	75706.8	94073.4	129188	46126.1	95823.8	38811	50209.3	51673.1
NEG	M116T77	116.044	77.143	60619.7	92260.2	79779	122791	195225	91619.5	99994	79262.1	52219.2	88497.6	137472	75266.2	127129	114574	104887	122766	116815	86570.7	130007	104134	59422.3	76565.3	113657	85428.8	117717	84193.4	91745.2	197321	98734.5	184293	63235	81266.2	89291.3	42692.8	64838.5	129689	54096.5	80639.8	140946	94818.8	118649	61120.5	96187.2	32272	100209	52043.4
NEG	M116T239	116.052	238.758	48962.4	47011.9	56210	63219.6	48270.6	53887.2	47829.8	53242	48024.3	35514.1	61944.9	51747	65682.1	53579.7	49065.1	68657.3	39563.9	35118.9	46726.1	44710.1	55856.6	40905.5	45523.4	43536.2	51384.6	50204.4	42140.5	54211.9	59803	53500.8	58072.5	48705.2	69126.4	46204	44060.6	65486.6	42089.6	48335.2	50014.4	54580	74747.8	41714.9	53761.4	58680.6	53988.9	55418
NEG	M116T334	116.047	334.47	353.98	373.451	511.673	3958.88	3403.97	332.937	2948.3	556.01	516.001	397.976	262.367	459.891	323.627	655.314	397.95	461.525	442.027	391.539	437.154	364.78	354.901	401.389	467.978	275.989	455.742	401.18	3378.56	3731.43	4044.15	418.548	2471.85	3478.77	503.578	309.435	439.284	382.896	434.345	3068.27	323.007	549.126	281.231	3303.03	4408.77	414.03	373.33	578.518
NEG	M116T33_2	116.044	32.592	116318	30100.4	186786	123781	11238	73068.4	83942.6	78240.8	101082	78924.3	98424.4	80956.5	97599.4	88213.2	10472.3	24047.8	30937.2	25977.4	34330.7	31429.7	79898.2	25201.2	44813.7	179303	44670.8	89619.4	962.595	34003.6	62709.1	7820.54	2448.98	35894.2	77746.6	171585	122054	33631.6	71770.8	54978.5	54724.9	31379	105953	128960	141386	122382	145835	132430
NEG	M116T103_2	116.051	102.649	58929.2	26909.3	115554	29138.3	13670.4	20148.7	92686.9	135426	71426.2	20659.8	57633.8	1.56845e+06	82349.6	47096.7	347134	14098.7	52043.8	45259.3	60998.7	51189.6	61338.4	28546	13868.2	34579.4	47921.5	59201.1	65853.7	26258.5	76742.8	29276.8	39952.4	1.57508e+06	182283	85297.9	272635	25069.9	131009	71198.5	28417	67053.6	125024	57481.7	20968.2	34532.8	24103.9	75814.6
NEG	M116T296	116.061	295.519	1907.64	13381.7	17401.5	1305.64	13358.4	15129.5	1386.1	11501.2	1148.48	1068.17	12720.2	10785.8	14326	2325.96	10241.8	11935.3	8922.45	10657.2	1365.58	8030.39	14724.5	910.949	1390.21	2400.65	1684.6	12510.6	11228.9	12185	13365.5	10968.2	1811.01	11887.9	19432.2	1158.99	1538.82	15122.1	2364.06	3284.93	10246.6	9381.59	12833	11861.9	16401.3	1882.64	2010.89	11026.9
NEG	M116T284_2	116.073	283.757	876616	883622	1.39922e+06	1.41095e+06	1.16768e+06	1.01716e+06	847676	834838	702204	902347	1.05253e+06	921763	1.33552e+06	1.17647e+06	940023	1.3535e+06	633958	683586	882046	670589	938825	641019	847350	847538	912957	746140	796991	1.07029e+06	923121	1.13979e+06	982398	855560	1.06598e+06	718039	808202	1.27823e+06	659974	792318	999993	854994	1.18473e+06	878616	1.30267e+06	995379	1.063e+06	914750
NEG	M116T317	116.072	317.457	11937.6	8368.2	25959	12759.2	15155.6	17014	12609.1	15801.6	13221.2	8741.94	14748.2	11861.3	15405.6	12046.9	12644.9	15035.6	35227.6	10726	37281.8	10958.4	12906.3	8032.33	12622.2	12142.4	11050.5	11351.2	29543.7	15253.6	12971.7	13058.1	15312.7	13445.4	9464.98	9388.68	12043.7	37287.1	9771.84	10640.3	13713.8	10942.3	16370.3	13303.1	58877	15812.5	13359.3	10041.2
NEG	M116T212	116.072	212.19	10698.8	2372.59	18346.3	10380.8	2717.01	9023.97	10991	10962.2	9152.65	6961.23	6480.18	6007.54	15394.5	7620.46	2796.8	5560.28	2942.03	3323.17	4694.28	3589.84	7105.02	3911.43	4915.83	11709.8	4440.98	6899.19	1398.84	4692.45	5282.35	1587.47	1606.05	4288.75	3424.41	18652	9832.01	4538.8	8807.45	5373.94	4504.84	3561.78	16148.9	8584.21	12501.9	13462.7	17598.8	17635.1
NEG	M116T249	116.073	248.992	4322.73	7112.06	19387.3	4675.43	4319.76	7522.11	3818.76	4189.27	2888.67	5601.6	5644.57	7979.14	6189.4	6374.71	3925.97	7414.86	6546.22	4912.17	10178.1	4986.93	7182.29	6373.75	2472.43	5008.07	3566.7	7896.84	5859.22	5184.7	4376.98	5601.46	7352.85	6363.01	6981.78	4705.01	4676.1	4996.03	4123.93	5941.92	5082.57	6230.64	5034.4	6016.15	5874.1	5784.59	4943.86	4868.29
NEG	M116T81	116.08	81.101	8281.19	12629.4	8342.03	10186.6	840.881	9157.7	11904.7	13635.2	13053.9	8141.92	9620.54	15842.1	9156.95	11213.7	10189.4	18344.9	11362.4	7190.65	9102.13	12182.5	19972.7	8918.33	11670.3	8436.9	7445.52	4222.95	15052.7	14459.7	9872.38	11212.7	15446.6	17781.1	21057.7	10174.5	13771.8	8969.65	6524.15	8099.27	11164.7	8231.54	6387.33	12511.4	8682.11	16246.3	8474.71	10068.9
NEG	M117T333_1	116.606	333.412	1269.37	929.398	1318.91	1720.09	1432.71	898.945	855.035	1465.35	1293.1	1245.64	882.833	1228.95	1306.72	1759.62	559.516	1417.45	1211.28	1406.37	1517.14	1155.21	1509.36	1451.54	1445.79	1625.6	1189.5	1228.17	1453.01	1438.35	594.686	515.934	1529.36	1489.57	953.381	1388.73	1142.27	1603.59	1751.15	1572.85	1814.5	1483.93	770.749	1693.71	983.087	523.186	1527.32	1589.46
NEG	M117T142_1	116.703	142.056	1185.82	760.201	727.718	608.321	843.914	699.498	686.714	850.354	951.979	1010.1	680.036	1791.8	562.483	1924.23	1418.17	1208.47	747.312	1491.96	1166.91	745.694	447.498	693.419	1149.32	690.421	1218.19	712.498	725.349	2883.13	902.82	1035.63	830.232	1894.31	1058.62	1115.71	369.72	528.102	807.742	1475.56	1157.68	760.535	782.029	879.095	1733.41	820.393	1096.37	770.935
NEG	M117T608	116.93	608.471	482478	524007	540016	510285	454769	518010	526699	533946	471874	618184	546826	580594	609339	478470	459002	509270	473500	597162	687140	529790	435628	595996	559439	657913	632030	607199	625770	507991	569820	422602	499854	566287	579473	593755	563112	496922	577925	520299	457731	520150	603291	623167	391277	526493	540936	522556
NEG	M117T66	116.929	66.3255	1.10146e+06	1.52113e+06	1.56009e+06	1.40678e+06	1.74511e+06	1.82784e+06	1.25188e+06	1.06943e+06	1.10592e+06	1.15892e+06	1.44049e+06	1.46964e+06	1.27281e+06	1.57132e+06	1.51795e+06	1.16683e+06	1.55638e+06	1.34422e+06	1.89693e+06	1.55082e+06	412837	1.69306e+06	1.13253e+06	1.17905e+06	2.10767e+06	1.44151e+06	1.0768e+06	1.3224e+06	1.10869e+06	1.14462e+06	1.74462e+06	1.7291e+06	2.21038e+06	1.40996e+06	1.94186e+06	1.18596e+06	1.32824e+06	1.29328e+06	1.33379e+06	1.32772e+06	1.3075e+06	1.31122e+06	1.46903e+06	1.85472e+06	1.2511e+06	1.27648e+06
NEG	M117T136	116.929	136.026	1.14617e+06	1.18682e+06	316145	223354	1.05292e+06	1.02517e+06	413906	1.37513e+06	1.32688e+06	1.14619e+06	1.43203e+06	452493	552576	941119	174540	1.07136e+06	1.10973e+06	954269	258019	901768	408815	1.24521e+06	370734	268432	1.03141e+06	1.25748e+06	1.04036e+06	1.39561e+06	69522	446198	1.05205e+06	1.13018e+06	625452	1.20638e+06	255231	1.04557e+06	1.20451e+06	1.47443e+06	390849	867509	998863	937687	253462	182848	1.35784e+06	1.02226e+06
NEG	M117T22	116.935	22.32	68040	72618.8	77397.2	52324.5	100638	104453	63701.8	62031.4	78901.2	286898	84719.5	69036.5	68693.4	76115.3	24703.6	94225.7	60273.7	67429.3	92297.9	87235.7	78410.6	121697	229473	51612	108062	132985	290719	73705.6	61755.5	63872.1	86909.6	57641.3	67420.2	84529.3	88709.7	91203.5	81089.6	83665.4	58330.9	59041.2	43095.5	65563.1	71537.2	57185.1	60856.4	92431.4
NEG	M117T40	116.929	40.4195	406558	510660	422576	424563	389518	414641	431511	489495	466174	376007	459216	469859	406585	455955	530739	466673	137436	421449	439653	510020	141924	508462	483813	498795	471411	412555	458636	498516	587646	588229	303215	384468	359416	395543	466335	475153	350096	453401	430823	444113	309486	269636	67036	361732	444718	373970
NEG	M117T333_2	116.96	332.925	255891	236356	381178	401794	344494	392984	414397	358736	415011	307433	238239	188253	412347	505993	484455	274480	348176	366360	411822	418061	433205	452722	457430	452063	394652	390842	433141	453270	294524	285833	412938	399021	261250	388909	435212	275413	249459	420025	430921	411836	469760	352848	468674	249532	448097	418351
NEG	M117T351	116.973	351.483	12208.8	8126.37	940.159	13452.2	10710.2	5597.47	10360.8	16000	7051.56	12539	11483	12461.9	14019	11035.6	8884.25	7628.58	6395.52	11026.4	11750.1	5125.37	11700.8	10681	10195.4	12102.5	9777.08	8062.51	13015.8	5152.89	9670.05	9578.97	11747.8	10958	7655.62	14534	8139.54	14211.4	9294.32	1142.65	8061.1	12691.2	13824.4	7011.01	17566.1	11993.2	15177.6	7488.98
NEG	M117T334	116.979	333.715	11585.7	600.879	218020	6927.64	18294.1	12909.6	224549	252408	222045	263823	214966	12467.3	24182.9	270207	246432	223551	13549.3	296190	233715	1147.71	209230	686.395	239935	229877	227101	16081.7	227072	227339	232561	223315	192409	16456	226118	244592	216244	265915	30295.4	229406	211541	284571	231568	281951	227481	242791	249446	210864
NEG	M117T368	117.02	368.006	29987.2	22997	31514.6	37497.4	42438.6	33143.3	34760.1	29785.3	42159.9	21105.1	40288.7	32600.8	52362.3	49083.5	53254.9	42805.2	40004.1	36674.5	37682	41247.8	44538.5	33218.6	55533.8	51012	32749.9	29288.5	30513.7	49451	55867.5	49206.6	31343.7	32565.7	25062.3	40824.3	43801.2	52281.4	43878.8	49551.1	35245.4	39705	29601.2	38319	49557.3	43873	42248.7	40391.2
NEG	M117T302	117.02	302.161	9284.7	7290.02	9213.27	9662.6	26614.7	11164.1	23863.1	9119.44	12680.1	6923.96	12183.3	12663.4	13856	15997.9	16718.8	11580.3	8903.03	29122.9	22318.2	10278.3	30947.2	7149.53	10394.1	11096.9	9275.19	7320.16	22992.8	24971	20619.6	12524.7	9034.33	9397.27	25303.9	10008.1	15060.2	16039.3	9095.14	12444	14929.2	9024.24	13168	9170.16	11649.6	8454.85	13757.5	10495
NEG	M117T438	117.02	437.855	4844.61	3776.63	6569.67	5878.01	6387.75	6241.57	6961.97	5941.62	6281.56	4891.76	5330.68	5183.72	6689.01	7466.59	7209.92	6704.52	5658.33	4984.83	4024.07	5032.92	5723.64	4987.53	6259.37	7216.2	8111.13	4157.01	5973.35	6503.62	6988.97	5913.71	5741.6	4275.73	3852.39	6077.43	6023.23	6595.31	3944.59	5999.14	5878.29	4636.83	5480.19	5707.68	5925.96	6697.87	5666.46	5351.44
NEG	M117T104	117.02	104.119	28819	104470	36640.8	31235.4	30924.2	26869.6	37717.9	33745.3	61657.7	100732	61711.4	61061.2	54420.1	28664.3	33389.2	28545.5	40491.7	37689.6	39771.8	31060.6	50480.6	32870	138115	44848.9	37168.3	28034.4	30273.2	36630.9	50442.2	45481.3	42556.4	86424.8	50195.1	32673.8	41971.5	118593	35613.5	40295.7	37399.8	24237.9	46238.1	31489	42000.1	40017.6	138975	34419.8
NEG	M117T103	117.035	102.727	33427.9	45757.9	11397.4	32406.3	4930.66	5508.15	34923.6	3850.31	4750.23	8367.17	31818.5	10510.8	21447.1	14675.5	7943.64	7497.93	3614.74	5966.28	4260.02	30248.6	55208.2	1690.64	38929.5	8865.15	6199.84	15481.1	12601.8	7948.39	7517.04	6959.99	32111.5	13412.1	24044.3	9366.6	41239.2	5292.14	8299.39	9459.32	35050	12327.6	5885.95	34512	28195.3	14002	35919	26403
NEG	M117T372	117.039	372.454	3643.69	1120.24	3185.77	1738.81	2689.57	2599.45	2466.46	2891.24	4876.65	4748.21	2685.71	3063.51	3053.85	2009.29	6248.01	2943.89	3248.13	2227.4	1770.51	2483.65	1210.67	818.443	1527.58	2407.04	2229.19	1153.28	1900.58	2597.4	2188.85	2740.62	2399.65	3397.8	647.578	1443.77	2739.22	3179.41	861.56	2435.54	1770.07	2049.83	2231.71	2306.13	2419.13	4582.73	3905.17	1381.32
NEG	M117T243	117.039	243.01	2479.25	736.736	1830.52	1631.92	424.332	1240.77	1637.9	1475.14	2366.35	1439.2	1259.8	1507.73	2020.2	2506.95	741.067	1242.36	777.647	790.279	1046.3	931.543	1387.35	1556.93	1423.23	2867.08	1348.68	1250.19	1402.08	858.308	1605.77	1538.72	1316.41	1274.02	1291.66	2295.72	2933.43	1013.36	1614.64	1438.13	858.846	624.35	3045.17	2464.2	2582.2	3002.47	2580.37	2933.86
NEG	M117T268	117.038	268.082	1187.45	1091.5	1242.35	1274.22	341.777	1662.79	1215.93	1390.76	661.204	988.077	1034.83	1035.29	1602.94	1727.38	1819.31	429.178	577.292	1332.57	1396.05	373.862	1420.46	539.698	2392.17	1392.38	897.173	1951.77	1321.82	1354.82	1048.97	815.785	700.635	1232.22	1266.19	1140.28	1662.89	1719.4	1750.99	1369.11	1256.48	1355.87	1527.79	1334.14	329.339	1154.5	905.864	1390.44
NEG	M117T61	117.045	60.642	3875.28	10984	5837.31	7027.8	14163.9	9875.44	8767.09	5804.94	6449.21	9324.83	13031.6	5737.33	3650.67	6999.24	10655.1	10504	7989.91	8232.99	13743.5	8754.23	11406.5	7852.1	12138	9680.85	12462.8	10040.2	9873.75	21820.8	11121.8	37291.3	6019.01	5700.16	11567.2	6392.03	6769.55	8064.1	2793.02	7973.36	6104.19	10694.2	11479.3	5209.42	9913.59	5969.72	8397.77	7164.56
NEG	M117T32	117.045	32.096	17983.5	3743.57	19737.6	21689.9	1701.51	9090.05	17749.8	12409.9	15647.5	14753.2	12390.8	7917.21	12702.9	10759.7	1697.28	2365.86	4818.72	2741.11	5266.35	3827.77	15179.5	4889.57	10789.6	23589	5431.78	11902.7	6988.74	4959.06	8691.51	1591.7	1619.27	8524.54	7527.23	27113.9	18483.7	3459.68	10603.6	9962.58	3706.11	4474.92	15790.9	19582.8	16313.7	16420.3	17629.6	15993.7
NEG	M117T142_2	117.056	141.954	315638	236682	271628	300530	287240	219285	393212	201434	236027	352224	388446	584674	430979	489991	397591	421068	214039	487111	289215	196736	280813	165723	326894	279823	336101	178897	203333	981373	290676	303052	533976	564625	311426	326949	384372	375316	199129	465325	413632	184336	313670	219526	550693	267756	401325	242904
NEG	M117T171	117.056	170.984	75700.6	44159.3	55565.1	69274	63657.3	41561.5	90343.5	50598.7	67406.7	81238.4	92359.3	125710	86937.6	112225	92460.8	83570.3	48379.6	105257	65926.7	46766.4	24981.6	44204.6	64718.2	61483	67534.2	44692.1	48432.1	247114	63069.8	78782.1	80185.1	123229	54561.5	75324	92599.1	81502.3	50451.3	114399	67788.1	41815.1	59243.1	45602	106372	42757.4	84173.1	44591.4
NEG	M117T219	117.056	219.108	6943.03	6714.9	8964.5	7350.5	6513.19	7103.94	8274.95	8080.69	6671.75	7069.37	9060.27	8461.53	8229.11	8553.17	6951.88	8158.54	7856.52	8167.37	9867.79	5540.53	8810.59	5139.95	7846.17	9178.89	6505.06	6802.02	6306.36	12237	9452.95	7409.18	8142.86	8925.79	7583.02	9015.14	5468.23	10067.8	5939.2	9448.92	7855.06	6606.19	7336.88	6121.73	8849.29	9463.31	8258.41	7532.51
NEG	M117T239	117.055	238.645	9267.62	7541.16	8719.2	10803.4	8304.91	8930.76	10858.2	9385.63	9411.3	7601.67	10282.3	10224	11305	15855.3	8929.66	13980.4	7685.14	8597.8	5655.77	10310.2	9727.95	6062.81	8132.32	7989.13	8698.55	6865.34	8378.33	12051.3	9861.55	34057.5	9001.58	9582.4	12291.4	12607.3	8709.78	10334.9	8468.81	9629.93	7981.79	8451.07	10664.2	6615.96	9655.35	55246.3	10626.2	9905.76
NEG	M117T284	117.076	283.759	44899.2	45391.7	75028.1	73996.1	58738.4	50985.8	43517	42671.1	35090.8	42229.5	56204.5	49653	65457.4	63245.9	44042.4	73438.6	32881.3	36199.3	44150.5	35620.6	46663.2	32397.3	46397.2	44776.4	48153.1	38825.1	37811.7	56288.8	46640.4	59064.5	53507.1	44191.6	58039.8	37102	42633.5	63899.1	35628.1	39706.8	54139.4	40519.3	63731.4	42491	64190.1	51660.6	54605.7	49372.6
NEG	M118T338_1	117.695	337.717	1042.72	893.199	725.537	899.672	1031.49	918.925	729.805	698.223	1006.86	880.206	733.131	972.639	573.755	1058.27	693.07	1187.57	720.463	740.854	514.163	850.724	606.321	721.496	851.586	632.756	793.32	674.667	529.277	602.552	978.495	717.877	983.34	953.246	1115.42	474.857	784.845	748.861	677.325	761.628	960.758	850.785	618.153	872.304	1251.83	788.296	936.937	787.254
NEG	M118T609	117.929	609.49	81153.1	61656.8	70376.7	68565.5	51541.2	70620.4	92374.3	51973.5	51887.7	59498.7	59303.9	52038.6	75824.9	67469.4	61526.2	77914.8	49018	76253.2	86614.9	51247.2	43139.2	59461.8	41901	47202.5	72020	58410.1	88188.8	60821.9	41905	65275.9	50926.7	64196.3	56553.9	73263.7	55216.3	49212.7	55084.8	66648.7	51485.2	59259.9	58635.1	69534.1	36588.6	68666.6	60656.5	36073.3
NEG	M118T66	117.929	66.304	170766	139585	94694.6	160602	119334	122035	120420	139962	97085.4	126587	153196	130571	129953	186744	166120	131210	132676	120756	125411	153363	48065.9	153782	158194	120678	102607	127162	228248	169762	161789	155822	223540	118790	168947	139893	202655	154447	118084	155715	203611	134591	164064	119561	150767	231270	172341	155223
NEG	M118T23	117.933	23.207	4961.92	8527.34	29502.8	10276.5	7669.32	7973.93	5705.65	4751.83	30457.3	3178.35	5565.92	6399.62	5752.73	10329	6093.98	4170.4	9770.94	8292.11	5683.17	6589.91	4900.78	9189.73	30569.8	6193.53	24764.3	5789.06	7549.56	6029.41	5992.66	7875.3	28257.2	5718.7	8326.98	6142.27	4114.08	6943.15	3058.45	6877.28	27987.9	9611.13	21697.8	6051.44	9012.23	3347.81	7158.19	30833.4
NEG	M118T332	117.963	332.438	5899.06	2980.03	4877.52	3399.9	4195.26	4593.31	4989.73	5019.1	5576.03	3454.19	5688.23	5487.82	5298.15	5727.51	6311.19	6233.63	5188.24	4522.95	4546.28	5787.92	5446.57	6209.45	5423.65	3504.34	5054.94	3977.78	2878.11	3372.73	3688.96	6271.88	5409.97	2846.64	2818.61	5072.29	5247.56	6922.44	2187.49	5966.85	5725.94	3299.44	6203.86	5333.46	3243.42	5371.7	6236.12	5311.25
NEG	M118T133	117.997	133.192	2701.79	2680.81	5665.32	1841.98	2850	2715.64	3432.41	3872.49	1266.99	2122.6	1136.6	949.604	570.771	962.87	6131.75	3189.27	2633.61	603.948	2879.84	1126.75	639.139	2440.05	1212.95	3008.76	558.94	2374.98	3056.45	3038.83	935.176	909.397	2607.54	2463.61	969.48	3465.01	1465.12	3834.19	2480.35	3336.79	2763.46	849.167	4305.45	2770.36	3504.11	2759.35	3231.56	3395.63
NEG	M118T368	118.023	368.021	1361.9	1059.74	1372.44	2139.05	1601.69	1342.18	996.394	1265.35	1623.54	789.433	1910.51	1797.85	1875.7	2130.35	2705.54	1975.64	2040.75	1280.11	1745.18	1537.54	2157.44	1733.54	2454.61	1896.99	1831.54	1378.13	1690.51	2086.38	3064.64	2065.31	1136.42	1510.81	1375.71	1989.15	1730.5	2283.23	1417.33	2398.48	1404.65	1904.46	1280.83	1626.6	1449.38	2020.03	2074.77	2291.16
NEG	M118T34	118.041	33.928	5557.19	1838.93	5484.26	3832.13	324.978	2103.44	3355.6	2989.01	5042.19	1532.51	3414.25	1819.8	3304.01	3273.51	1702.53	1764.08	1896.2	588.234	3388.39	1744.06	1817.07	924.923	1994.11	4704.63	4761.83	3506.15	1598.21	5523.12	5430.04	11605.3	7762.13	1095.45	2230.28	9075.75	8218.25	1093.83	2075.62	3520.61	2201.49	2862.59	6374.88	5572.34	4298.37	9820.84	7740.45	6417.11
NEG	M118T338_2	118.052	337.903	292265	391774	294851	326163	323126	282722	287380	244336	308031	269877	284626	291174	298789	363093	278594	434569	270110	235155	220156	293020	287715	271362	318104	204799	354982	158121	285650	221172	368082	247375	294990	282724	434021	235291	272621	320045	167913	358217	365753	223422	339897	269089	392885	326672	338388	265102
NEG	M118T142	118.06	141.954	19150.6	15198.4	16031.1	19808.4	19383.4	15174.5	22430.4	12960.5	14508.1	23572.1	21583.1	34937.2	24332.1	32057.7	25836.2	24792.2	13618	28747.4	18268.4	12717.2	14926.7	11490.2	20908.2	14951.8	23062.5	12342.9	14033.4	62494.8	16944.7	20098.3	32357.8	33845	21370.2	19843.2	22904.3	20913.6	13092.6	29469	27192.9	12038.4	20529.1	12833.7	32977	16109.7	23624.8	16341.5
NEG	M118T240	118.067	239.984	2362.14	3012.53	2517.18	2730.96	2691.02	2460.38	2916.09	2031.42	2060.37	4290.12	2728.75	2633.15	3424.96	2327.08	1713.36	2676.44	2052.58	2291.43	2250.94	1757.79	2289.32	1686.92	2465.55	2286.82	2764.37	2134.82	1633.01	2217.29	2382.25	2607.12	2617.2	2440.9	3837.3	1955.09	2200.93	1914.22	2294.35	1907.52	2246.61	1851.52	2727.51	2653.76	2234.18	2148.32	2925.56	1954.01
NEG	M118T284	118.077	283.847	3580.36	3576.46	5297.6	4988.48	4721.8	4623.94	3561.61	3865.66	2546.75	3313.39	4357.28	4254.89	5133.56	4802.22	3898.23	5723.79	3033.74	2681.08	4010.87	2773.43	3929.17	2955.88	3534.48	3370	4037.86	3114.15	3558.55	4378.35	3685.91	4900.21	3680.38	4280.67	4481.08	3047.66	3371.8	5261.37	2861.73	3358.25	4020.89	3431.69	4906.2	3535.78	5062.82	3495.27	4254.34	3503.52
NEG	M119T294	118.675	293.902	1373	1733.06	743.594	1620.23	1708.03	1541.03	915.634	1649.03	1372.38	652.006	1372.65	1336.63	1897.37	1266.57	1877.42	848.402	853.846	894.012	1765.56	1451.5	1750.96	1253.85	1079.08	944.503	802.242	1123.03	1262.55	1009.05	1776.55	1987.35	495.371	431.12	860.383	816.426	1152.89	1896.66	1480.36	1673.78	1925.02	770.94	1924.96	1856.98	1909.12	1166.72	1720.05	421.464
NEG	M119T680	118.919	679.836	9943.79	24579.4	12562.5	9015.09	10705	10394.8	11450.6	10401.7	11191.8	10397.4	11990.3	11258	12997.2	12539.7	13449.5	9959.98	6595.88	10889.9	17485.2	12013.1	13438.2	12323.5	13677.2	9214.66	10318.3	11278	9834.63	11014.8	9365.61	11114	1970.63	10602.4	13014.8	21334.6	9967.17	14079.2	15769.3	11899.2	35002.8	9579.52	30424.7	10123.4	13526.9	28086.7	13042.5	11178.8
NEG	M119T656	118.919	655.579	9086.34	7869.26	12125.8	9264.9	17120.2	11890.6	12585.1	8857.76	13783.7	9821.79	11334	6438.48	11416.9	9841.12	12574.2	4111.11	21660.8	11039.4	10566.9	13046.1	9228.77	9316.81	11905.8	12423.7	12097.8	10202.2	8562.09	9648.41	9233.12	8934.35	13961.9	10079.1	10142.7	9533.72	11842.2	13434.4	15338.3	12732.7	9539.62	8562.48	10955	10250.1	14210.7	10734.2	11076.2	7987.01
NEG	M119T705	118.919	704.765	9583.15	9527.34	9783.33	1820.15	7673.34	9703	8003.96	15663.9	9337.21	8210.26	9117.92	8128.95	8065.23	9548	12202.1	13272.6	7937.13	7327.43	12979	8906.94	9621.87	8187.73	14254	8963.23	5326.98	8260.51	7089.52	7823.58	8757.32	9465.5	9511.47	8911.06	9806	3820.93	8647.4	9272.23	6462.93	8369.78	12562.4	11924.2	9271.15	7063.51	8058.7	19231.9	9495.87	8968.89
NEG	M119T633	118.919	632.741	7281.6	7527.58	8781.85	12213.7	5841.9	12122.9	8398.84	8169.83	8904.06	861.276	7625.54	9580.01	4144.75	8577.71	9294.75	10507.5	8345.65	7533.77	9276.77	7951.24	8747.79	2429.44	10098.2	9066.77	8301.26	6155.57	6645.09	8527.96	10709.3	15273.5	10226.6	6622.44	8556.18	7688.02	8538.7	10648.5	1449.77	8066.34	2815.32	6734.18	1047.64	6748.69	11652.8	1858.05	9505.87	8170.25
NEG	M119T407	118.943	406.554	16858.1	18253.1	20643.2	25227.9	26333	18618.2	23070.3	22012.7	20445	17578.4	25547.2	21568.5	25540.1	27642.4	24911.2	25427.9	19714.3	21336.7	18574.1	17881.1	22950.2	18638.3	19247.2	24910.9	22346	15586.3	21302.5	23755.1	23928.9	20584.2	20320.6	19488.3	21747.8	20797.4	23786.8	22314.5	19402.3	22193	22147.1	19200.4	26046.7	21104.2	22185.5	23364.3	22667.6	22184
NEG	M119T660	118.943	659.82	11663.8	4517.11	3395.94	9943.51	13580.7	12436.6	11702.9	5237.79	4255.07	14577.4	10228.6	3661.88	2696.18	13044.6	13499.9	12222.3	14531.9	4454.26	11064.4	9822.19	11643.2	12447.9	13269.1	10704.8	2325.72	9745.96	5115.29	12646.1	2203.16	5241.13	12247.1	9145.46	513.209	3934.7	10839.5	14230.7	8749.96	10760.1	3561.21	4641.52	13641.1	11854.4	13820.5	13617.9	12125.9	11638.1
NEG	M119T618	118.943	617.995	25577.5	4924.48	15554.5	29733.6	27812.9	30708.7	31374.8	26635.8	37456.6	33500.9	29599.8	9353.53	20755	35320.5	40102.2	35433.5	27163.1	51369	34740.9	33194.7	33483.8	28227	37081	33251.8	29639.5	34168.8	654.059	33175.8	492.335	38950.8	34406.4	11507.5	36376.5	9538.61	36650.8	34060.4	28497.7	35833.7	32884.1	26807.9	9910.62	36130.2	34277.5	35782.2	35268.9	32498
NEG	M119T333	118.958	332.704	30983.3	18983.3	30175.8	28449.8	27646	28504.5	30630.6	29400.5	32410.2	26115	30137.6	30628.4	32045.3	36295.2	35394.8	19216.7	29726.9	29459.3	30141.7	29982.2	30153.6	30481.9	34050.6	19917	30128.6	20476.7	31435.2	36383.9	19586.1	25239.4	29219.6	17172.4	21728.8	29770.1	31894.8	24580.5	30813.9	19349.9	32217.8	17223.1	36627.5	28805.2	22766.1	32561.5	32644.4	30133.3
NEG	M119T293	118.981	293.457	17.3773	24.4108	40.6475	55.1268	12569	11731.5	16.3171	12879.6	16273.8	11439.7	14778.9	46.7725	36.9091	35.464	15495.4	24.3112	12634	12866.6	12668.7	13367.4	15145.7	32.2089	15681.5	37.2175	35.6397	19863.5	12609.3	44.0511	14695.8	97.8502	55.253	45.0133	47.8589	39.5498	14811.7	16649	15674.8	115.755	18658	12707.9	16679.1	15145.8	58.0752	15545.7	95.1243	33.6233
NEG	M119T15	119.018	14.799	31152.9	23781.1	17157.6	21215.7	22866	22368.1	23224.5	26391.9	21844.1	29726.6	25077.5	15968.8	25255.8	21476.3	24788.7	28137.9	21589.1	14573.8	16341.4	14692.9	14313	23038.8	21366.8	19205.2	26185	20721.6	8237.12	23096.3	21141.4	18315.1	23803.2	20513	18673.4	34550.8	20844	25713.9	35662.5	15320.1	23604.3	19284.1	14574.6	20792.6	21949.6	24175.5	23513.2	24763.4
NEG	M119T295	119.036	294.842	231777	401200	274754	281817	250180	226791	256632	385995	290050	349097	280594	261433	333383	355743	306023	288952	355335	229866	383784	239013	294435	224369	297158	265821	413307	230655	372385	318033	440167	329925	295493	231580	331704	248006	271469	324874	380375	267446	346465	229813	313414	228658	482738	301994	288590	277108
NEG	M119T80	119.035	80.327	62438.7	65570.5	44547.5	71328.5	56876.9	41770.7	64484.8	56819.1	71383.6	70485	89252.9	54433	60789.7	90385.4	78309.4	70583.7	87536.7	70441.8	42239.6	59634	132477	80967.4	102945	43196.9	78398.6	78052	83271.1	55019	63887.5	115579	54945.4	61794.4	109243	68091.9	118800	89134.5	87577.5	97156.1	67307.3	58258.3	98290.9	73361.3	70333.8	73012.6	78660.1	73710.4
NEG	M119T161	119.035	160.993	75198	34892.3	40296.1	68415.8	56059.2	56974.7	80117.5	34786.5	90499.2	33002.4	71817.2	59141.9	49575.7	44505.7	80530.8	70926.2	35220.8	61206.2	60137.2	77818.9	34757.3	79761.6	86765.1	38562.7	37288.9	30846.2	34944.9	87469.6	74379.4	89440.1	86909.2	30689	43993.8	33071.5	43080.2	82670.3	68594.4	75538.9	43923.6	30007.6	78333.9	29290.9	73694	80515.3	53155.4	78726.8
NEG	M119T121	119.036	121.232	86223.6	255567	138970	146310	163901	154803	151782	132262	193674	138576	166361	64580.2	161308	227832	107714	68458.9	94963.4	184485	74819.6	156891	138895	145651	161207	81758.7	171968	96585.8	61516	123345	133496	223141	144965	103115	195993	171842	277320	92214.2	194659	289863	149812	54050.3	223888	194709	183080	213669	202970	166096
NEG	M119T258	119.035	257.765	24586.8	23664.2	34996.7	65068.5	29078.1	78480.8	36336.8	26668.5	33120.9	61631.4	36404.4	28543.6	67006.8	64749.3	27346.5	33778.2	35857.6	55482.2	26190.5	28218.9	61397.6	19364.8	31050.3	61352	37255.4	17176.1	32020	65555.8	32711.4	50653.5	32398.3	29838.1	25221.1	27446.5	23833.9	35266.8	46872.6	30904.4	29571.8	46076.8	35354.2	26009.1	42971.1	47651.1	44877.6	31581
NEG	M119T236	119.035	235.948	21547.3	51803	29786.5	25620.6	68077.8	27521.4	28116.2	28386.4	24332.9	17879.8	22101.1	20799.6	31702.3	32220.3	58574.9	26415.8	23056.1	32165.3	19599.9	16830	26797.8	15143.8	77782.7	24356.5	28991.3	10750.5	23016	18292.3	30826.2	21033.1	20833.5	22385.3	22930.5	19332.2	25866.3	24173.7	15872.9	32959.4	25547.4	16324.4	94713.9	23043.3	87466.3	37940.6	49687.8	16779.5
NEG	M119T23_1	119.032	23.055	16350.4	3601.99	6687.44	8077.1	3065.72	4363.95	7170.26	22115.5	14807.3	6647.96	3790.67	3909.54	12388.6	9187.51	2918.96	4458.6	2866.47	2066.02	2074.33	8465.91	7385.16	2601.98	3047.2	11142.3	2854.4	8986.96	2197.22	2845.05	5253.76	3289.29	3862.28	4196.02	7646.59	19014.5	20955	4774.74	10300.1	8877.39	4577.24	2992.08	10228.9	10847.6	15912.7	15838.4	9674.44	14831.7
NEG	M119T281	119.051	281.317	10998.2	7219.6	8712.44	8743.04	9415.08	9144.42	6658.13	7384.12	6816.11	5596.66	7950.36	8079.62	9815	7867.79	5224.76	9426.73	7446.14	5590.81	7348.16	6260.88	6802.91	4989.39	7837.76	6701.15	5756.28	5554.46	8281.75	6667.6	8238.75	6035.5	7877.83	8280.15	9106.14	6006.43	4353.69	10868.9	6458.33	5843.13	7097.92	6272.41	9592.33	7640.13	8143.28	7434.03	6889.69	6816.25
NEG	M119T338	119.055	338.113	12194.6	16020.5	12590.4	13962.8	13022	10837.7	10556.6	10658.5	11938	11191.8	12220.9	13681.1	12838.4	14967.1	10172.2	16558.7	11338.9	9628.64	9395.98	10716.2	11167.7	10707.4	11612.7	9120.57	15214.5	6593.37	11607	9021.1	15923.6	10639.8	11745.8	11257.8	18250.2	9714.16	10479.6	11951.7	7390.06	14910.8	12943.5	9965.05	12997.1	11477.5	15823.3	13302.7	13603.1	10493.4
NEG	M119T103	119.051	103.254	71741.2	31041.1	52814.8	29051.5	50050.3	39602.2	101611	17531.4	33474.3	44831.7	45317.3	25343.4	36096.8	42427.3	37465.6	37537.9	21826.6	33809.7	23488.6	20769.8	21509.5	15061.5	33616	51482.6	25873.3	22973.8	18814.7	41515.2	27158.7	23379.5	67581.7	30918.4	36334.4	29317	25613.3	19865.4	28770.4	97787.2	41660.8	26080	32058.3	21953.4	27141.5	58181.4	36292.5	27911.3
NEG	M119T240	119.051	239.554	22357.5	3720.09	3411.39	3392.72	3020.43	2792.29	2987.84	2659.21	2041.69	4517.92	3968.67	3567.61	3949.78	2675.84	2081.77	3672.19	2791.36	34654.7	3257.36	2518.54	2184.53	2304.11	2803.17	3414.22	29083.5	3014.6	3014.71	1968.23	2879.88	2571.25	3479.99	3566.56	4433.43	3198.35	2652.87	2698.8	3683.73	2159.78	2797.78	3499.94	2296.1	2915.38	1871.25	2289.16	2523.47	2511.63
NEG	M119T23_2	119.057	22.954	106534	30343.7	73781.7	49990.4	130956	169115	198323	28131.6	152953	252071	69798.1	61774.4	65656.7	320461	101722	261671	495322	85861.2	17121.7	57976.5	21944.3	307535	24765.7	191397	38289.5	33066.2	369410	38308.9	91825.8	92743.6	82698.8	55060	37697.7	11150.2	101423	136060	81245.5	92272.3	110981	64653.3	158612	80984	36774.5	40096.8	49428.1	12404.8
NEG	M119T142	119.061	141.588	6500.51	1439.21	2620.95	1530.89	817.307	647.239	7049.7	2586.28	974.543	691.522	1552.31	1604.89	758.257	2357.05	642.398	1519.9	4085.88	2232.48	2083.63	373.903	855.273	1472.45	2520.53	3465.82	4554.5	399.42	249.003	5890.71	12817.5	869.88	2926.52	1190.48	491.777	3687.09	1581.12	786.134	4389.27	1802.16	1467.88	211.918	1122.66	1478.02	2678.98	938.895	1502.19	8262.4
NEG	M119T46	119.087	46.366	13380.1	5660.32	5660.1	8747.83	2813.22	7523.71	21024.1	15448.2	18800.9	9391.22	10070.5	10057.2	13863	19718.3	8993.39	5571.32	6306.68	4618.09	4253.28	5790.47	441.866	4094.6	25246.4	18114.3	8835.93	12936.8	17372.9	9673.79	17611.1	15661.5	5203.1	7992.29	13124.3	16427.2	12767.8	13195.1	11938.8	9210.36	5809.44	7402.56	8473.05	5495.4	14666.3	11484.8	8402.24	22739.9
NEG	M119T87	119.087	86.5765	13795.7	11901.8	10207.9	4674.51	10852	7982.29	21242.1	4433.29	10927.5	9164.84	16265.1	12673.9	14507.9	6449.78	8296.87	10065.1	10368.2	9949.73	4678.67	10539.4	4049.41	6429.08	16611.3	9526.96	4590.02	4450.66	4355.78	11468.1	11077.7	11242.9	20361.1	8297.83	10403	5231.14	9583.79	10960	18509.1	10463.1	13339.5	10423.1	10287.7	7402.36	11032.5	16816.9	4478.03	10660.4
NEG	M120T630	119.946	630.28	2341.84	2325.45	3850.76	2214.12	2166.48	2597.58	3075.3	2607.24	5071.42	2902	2742.94	1613.12	2840.33	3945.45	4582.58	3494.53	2452.9	2346.6	2143.73	3953.6	2428.37	1056.56	5147.34	442.883	2148.96	3076.38	2075.51	6348.78	2814.23	3377.77	2974.52	2736.27	3419.24	2169.42	6398.91	3194.92	2026.13	3184.84	2166.63	3266.6	3101.06	3291.09	6503.06	2728.97	2578.8	2982.07
NEG	M120T703	119.946	703.427	3097.84	3103.11	9582.4	3777.42	2762.77	5349.16	2911.75	2813.06	5947.1	4401.82	4142.47	2632.66	4414.29	4108.47	4578.26	1776.78	2892.73	2745.36	2833.47	1509.84	3569.52	2510.54	6420.26	3448.52	3124.02	3327.28	2570.37	3793.69	4644.13	10695.6	7460.3	2250.99	4486.73	2996.76	7093.94	3882.56	2989.97	4006.65	534.358	4478.15	1255.05	2821.24	6473.58	5522	4641.75	4224.38
NEG	M120T13	119.947	12.958	4524.72	1808.55	5260.5	4106.02	4086.24	4212.69	2080.72	4590.42	6507	2786.88	6768.48	4837.33	3820.86	7223.06	3196.01	3854.1	3950.61	1762.4	4798.1	5991.36	11820.2	4352.36	5843.52	5461.43	6393.81	5115.12	5083.2	6181.51	5860.56	8722.77	1700.72	4680.47	6705.87	6483.92	2345.99	9756.08	5718.88	6477.12	7007.4	2912.78	3191.47	833.683	1704.35	6222.89	8254.25	6683.93
NEG	M120T201	119.948	200.892	16016.7	15249.9	15251.2	16539.7	7713.52	9165.74	8171.24	16090.4	12888.5	9823.15	12047.9	13347.1	5781.76	10412.2	17089	13781.9	8818.66	11908.9	13944.6	18243.7	11896.7	24448.2	21060.3	14267.8	17126.4	14905.7	12524.6	11883.3	16632	16172.8	16988.9	10765	17712.7	15566.4	9806.15	14467.5	8811.32	15871.7	11964.8	17130.7	11268	11592.9	13756.1	14196.1	9821.7	15624.5
NEG	M120T150	119.948	150.47	6413.73	5872.47	4422.57	6090.33	4104.31	2332.56	1351.81	7824.12	5040.52	4993.12	3480.4	4738.85	4629.21	5422.22	5052.07	3330.33	5418.13	5400.46	5283.67	4758.58	6275.32	7607.42	3287.61	4116.96	5989.09	4946.2	4216.64	4541.3	4341	6466.11	4888.15	3890.38	3237.99	7405.99	3641.96	4187.62	4607.17	5008.29	1337.68	5811.42	3713.78	4150.79	3646.11	4318.3	3859.45	3693.16
NEG	M120T254	119.947	254.418	5598.96	1389.48	2577.86	6203.92	4644.83	4193.74	5893.67	6566.11	3853.34	4104.09	5129.78	6279.39	4767.5	5925.93	10784.9	5746.18	4922.06	6367.47	13439.6	5900.45	16244.1	4518.22	3915.15	4728.83	8984.14	4922.93	4052.37	4162.85	5519.91	4656.23	6314.76	5517.08	5381.49	7212.05	5800.19	6055.38	4910	12706.9	12664.2	5300.12	6921.25	4652.7	5927.1	3475.11	6263.97	3886.16
NEG	M120T238	119.947	237.95	7215.48	8250.46	7478.38	10809.5	7454.4	5727.48	6409.72	8348.89	7362.62	7075.48	6512.66	6643.28	7838.93	39837.2	6907.51	11186.6	7228.18	6709.32	6414.49	7545.4	8462.35	7053.04	8477.26	6169.56	7243.32	6579.54	6514.64	6422.32	5544.53	7755.97	4925.53	13328.4	7201.8	7171.83	7030.19	8543.29	11946.3	6554.55	6730.6	6647.85	41421.3	8346.43	7695.13	6330.18	7252.84	10311.6
NEG	M120T662	119.947	661.88	2141.03	1761.57	2410.07	2248.45	1781.68	1841.44	3115.71	2022.66	4316.48	2112	4011.69	1628.5	4552.22	777.635	2505.26	2427.45	1562.47	1656.58	1790.25	1117.09	2254.17	1507.63	1892.42	3125.2	2366.71	266.967	1521.57	1980.71	4403.56	8297.85	7184.01	1327.95	2312.11	1845.36	2730.1	491.49	1587.89	2796.23	2986.56	2412.65	13097.2	3033.57	2609.68	3339.39	2752.4	1748.48
NEG	M120T679	119.946	679.349	3834.13	4146.66	980.897	3874.47	3237.95	4256.24	5762.75	3330.86	9418.38	3720.48	3768.47	8972.08	14573.7	6461.79	11200.9	1236.93	3444.54	4024.51	3267.03	3614.4	4842.76	3379.15	6522.38	4516.22	3533.89	2874.58	3107.73	4885.28	6251.94	7823.05	5294.11	4494.12	971.772	4328.34	4471.72	5810.64	2769.49	6131.4	4329.39	2858.37	7783.67	9542.06	5062.96	12185.3	9961.79	4925.85
NEG	M120T282	119.977	282.478	8691.88	21983.4	12737	14054.3	15839.6	10615.6	12887.5	15928.3	15849	10043.5	21571.4	19333.9	24676.4	33402.9	26014.4	30134.6	19687.9	17297.9	18309.9	18146.9	26680.8	17809.4	33075.9	21216.6	19894.8	17678.3	18397.9	24056.6	31380.1	24894.7	23042.8	16671.4	10756	21762.2	26804	31753.1	18383.1	20470.5	21209.2	19033.3	23120.8	19456.5	29873.5	21679.9	23040.7	18858.3
NEG	M120T66	119.977	66.195	200377	356287	262451	121385	176074	282920	142381	260526	581646	426759	578874	406109	308385	681982	371645	795798	403512	671846	263881	256694	495213	298283	495633	988340	224888	507270	823632	328343	1.44397e+06	513732	690072	533224	409780	403721	478632	911879	538622	586937	524281	679575	334131	559711	461217	831662	434966	998737
NEG	M120T44	119.977	44.462	85943	199013	92813	105237	92131.5	113290	128710	153568	119481	85939.4	190387	180574	167999	285120	85818.2	178446	140036	138313	141937	193338	88871.8	168009	398489	203196	191153	148399	199781	132899	326693	272657	103882	126533	79670.4	240297	282109	244649	199897	190660	88593.5	220731	111421	163083	243157	130688	212228	225685
NEG	M120T413	120.013	413.193	9930	12314.1	7871.71	13788.7	8687.92	10683.8	12205.7	10004.9	11555.2	10292.7	12158.3	9518.74	13139.7	16870.8	10165.8	10552	8740.85	8585.56	10882.6	9347.48	9843.42	7423.48	10601.6	11715.7	8576.5	8402.93	8840.01	13639.7	11753.3	12761.6	9588.45	10352.4	14653.3	10061.4	11516.2	12832.2	7781.65	9359.72	12188.6	8826.27	15091.3	8563.44	10077.9	9604.51	12204.2	15797.6
NEG	M120T196	120.013	196.372	2967.37	3649.41	2165.05	5180.37	634.752	4357.09	6290.03	3019.02	5333.13	4377.57	3988.35	4465.15	4466.66	10606.3	1779.82	2927.22	1756.45	2099.87	1636.4	3046.58	5698.27	2018.35	3674.8	5064.7	3581.02	2218.07	1107.95	1476.92	4784.2	934.155	967.861	2969.63	11769	4321.56	7936.98	3640.95	2263.77	4730.13	3485.21	2830.06	7526.68	4589.17	7895.36	11882	5811.48	10420.7
NEG	M120T260	120.013	260.24	1209.54	1560.97	1773.3	1909.38	932.83	2290.8	4761.95	639.723	1933.43	1899.42	1845.61	1274.1	2258.17	2010.33	1502.42	1390.66	1913.12	1149.49	1297.86	1414.22	1256.97	1115.82	409.134	1814.99	1763.34	833.272	1784.43	1736.18	1616.26	1154.55	1424.75	1563.04	1698.08	1308.73	838.742	1172.68	1441.42	1529.06	1472.16	1149.15	1323.18	766.185	2130.54	1798.37	1981.03	1620.5
NEG	M120T295	120.039	294.627	15984.9	22913.3	18567.9	15186.4	10839.8	9341.77	9415.44	16275.3	21354.5	12096.5	20494.1	20778.7	14027.8	14056.3	17308.8	11711.4	14937.7	9696.56	20173.6	9019.66	19408.2	11688.5	21401.4	18839.9	16638	8894.4	16160.1	11460.2	17853.1	20013.6	19594.6	9210.85	13770.6	15983.7	10846.9	19092.8	16404.5	18433.7	14846	10828.9	11850.3	15445.1	20578.7	11969.6	18409.7	16074.9
NEG	M120T72	120.046	72.049	17451.4	37659.7	35571	174604	184121	11884.3	32119.8	16727	51720	18951.3	29536.7	200711	298130	28431.4	22930.3	352170	17927.2	23808.4	22169.5	325700	165541	309808	493474	35533.6	19322	242496	264220	20101	453069	27954.4	40636.9	196262	54484.6	13946.2	18833.6	450479	296841	13642.1	19784	12560.1	15939.2	1663.98	28032.2	292750	25523.5	327565
NEG	M120T45	120.046	45	1592.51	14649.4	8613.09	748.92	8187.95	494.885	2307.22	12573.9	11304.3	8112.68	18321.8	951.4	14269	21007.2	4426.71	17331.3	16807	12102.8	10851.1	860.674	7454.99	22331.6	32782.9	19711	17360.7	15494.9	15882.3	648.714	1911.3	21691.4	9163.44	9857.01	5891.13	1531.14	8516.86	485.324	15307.2	2107.67	931.896	1227.1	13837.8	20993.9	20776.3	10219.9	19567.6	1030.8
NEG	M120T338	120.056	337.836	1778.28	2580.43	1516.79	1826.09	1619	1399.09	1604.43	1626.92	1694.07	1437.85	2242.75	1632.07	1828.85	1778.95	1523.46	2565.5	1761.21	1022.42	1255.79	1726.07	2583.79	1551.44	1962.69	966.638	2658.09	803.915	1676.51	1300.4	2598.93	1606.34	1556.04	2138.87	2200.62	1766	1803.87	1752.8	743.01	2155.65	2100.02	1529.08	2507.29	1902.14	2251.28	1564.27	2424.13	2126.06
NEG	M120T23	120.061	22.7815	10253.4	1030.51	5404.91	3568.44	10442.9	10128.4	15891.5	737.602	11495.5	15375.6	4890.68	3417.32	3915.14	26037.6	8211.03	21043.5	35649.4	4705.51	0	7370.87	939.083	23893.4	1577.77	8893.36	3256.98	3021.91	28264.7	3633.48	6696.98	7300.58	5387.19	6171.24	2563.73	49.3577	7753.8	9422.48	5789.82	8544.06	9407.25	3572.22	13834.8	8593.79	3633.86	5792.37	3945.9	518.609
NEG	M120T318	120.082	317.539	553.104	339.823	1787.94	534.512	789.608	755.765	731.507	698.279	738.003	373.213	591.707	439.724	726.93	443.165	607.805	744.098	626.089	332.724	723.257	626.512	608.928	373.466	464.572	645.927	578.951	547.353	454.862	539.258	613.565	747.993	615.201	485.61	316.104	406.177	500.322	642.147	433.641	448.329	699.614	585.522	623.3	485.261	850.644	846.275	638.194	527.364
NEG	M121T109_1	120.665	109.267	363.346	42697.4	301.65	934.874	68.903	313.791	117.179	759.659	666.075	355.191	158.353	189.625	292.273	753.104	521.664	409.167	608.993	260.75	725.261	416.771	449.749	2885.69	280.575	336.412	218.529	460.093	296.214	422.888	142.232	417.178	302.754	192.831	260.724	826.921	391.991	287.81	415.865	221.354	932.65	165.2	484.331	278.928	176.801	347.413	433.101	604.479
NEG	M121T406	120.938	406.456	759.963	1444.32	1121.79	1214.85	1231.97	646.889	967.725	435.848	904.17	729.465	1196.16	981.923	1065.65	917.22	767.159	1196.79	840.415	695.544	918.554	740.639	712.272	760.95	696.623	751.543	1072.23	663.382	1020.01	882.401	834.924	698.611	637.076	668.526	1027.43	771.727	887.366	1082.74	717.348	967.17	931.742	866.542	929.569	899.599	689.086	1112.63	930.8	962.36
NEG	M121T61	120.997	61.32	4340.76	13560.8	47622.8	32380	29365.4	2506.24	18419.5	53883.2	15841.3	41424.9	49004.5	41900.4	39014.7	52356.2	56303.7	56997.2	36467.3	31369.6	38345.1	35291.1	3825.76	43229	63836.1	67331.7	12225.1	35788.5	43496	50128.9	62968.8	14108.3	79726.9	40989.9	13115.6	42930.5	42159.9	55446.5	16601.3	48233.6	54184.6	38068.9	63489.1	33898.5	554.882	39570	63058.7	7475.17
NEG	M121T109_2	121.03	109.389	134193	1.81573e+07	156121	195527	98563.3	114713	240943	156155	181555	155718	125030	111163	127006	179321	182594	169097	179836	124256	150084	134415	116256	455026	162869	158361	122032	150104	143786	169904	118473	144913	217295	100002	242557	153576	144707	168690	140458	130688	392230	80653.5	156224	85793.3	151094	193630	161984	139294
NEG	M121T22	121.036	22.493	10922.8	72592	11870.8	5488.02	2841.68	26235.7	25242.7	9081.63	8266.42	26302.2	9532.08	28418.3	8023.57	10686.6	6546.97	10585.9	7026.49	11654	8574.08	7680.66	11028.4	13842.7	9288.55	5640.94	7650.68	11086.8	11351.6	10910.1	10359	9799.73	10027.2	5773.03	4912.09	16370.9	6995.14	7266.89	8201.78	10757.2	8764.05	25587	9169.94	4473.87	12264	5029.82	16091	17696.8
NEG	M121T295	121.04	294.926	8242.83	34338.1	1793.19	1617	26352.8	7243.35	9491.7	1022.73	7067.76	990.921	7597.25	3461.15	2547.68	9504.98	1324.15	7933.73	1350.49	6968.46	1192.99	7825	17135.9	5694.7	5690.73	1909.1	2149.48	1579.86	1949.92	2353.61	7874.88	2301.49	5779.27	2281.09	2405.62	8796.24	2716.38	11525.1	6884.17	1104.94	17324	1848.33	9791.28	1877.44	1412.12	6803.32	9394.81	9190.82
NEG	M121T72	121.049	72.1745	2221.53	280.606	511.154	1978.9	2484.72	2067.09	3707.72	51.8754	2298.09	1582	2666.16	36.0022	30.1014	3245.2	2648.45	2908.66	208.968	130.276	84.8698	2220.01	2367.95	2018.02	3608.5	205.952	56.2696	1834.47	37.5262	111.526	32.9893	45.32	3669.42	2902.33	271.431	2869.49	1448.57	3166.02	1995.94	1729.05	2674.89	2130.07	3156.96	2033.65	3140.42	3043.07	148.176	2678.51
NEG	M121T143	121.077	143.022	7633.59	1394.69	12490.1	5855.62	6923.8	4492.95	8122.04	4321.43	13468.6	7161.72	5664.72	6456	12395.6	8179.87	9027.93	5329.81	3916.06	1905.87	2287.57	2894.5	3295.36	2399.49	7432.53	14080.4	11056.7	3743.24	1226.73	1403.15	25361.6	1469.29	1782.26	6250.04	8172.45	14849.7	13188.9	3393.48	8298.94	10993.4	4339.85	2420.28	11845.4	9807.39	12251.9	24916.3	14527.1	23845.1
NEG	M121T23	121.073	22.9725	159901	270261	36338.4	2248.53	847.692	2045.01	485551	36571.1	58280.8	3775.81	19436	39619.6	10723.5	178170	13309.4	2341.59	10255.7	48620.8	46462.4	41.1526	21603.6	1258.06	6387.8	1333.97	43674.3	1102.82	1695.19	2458.25	100004	111765	24761.1	37768.3	24293.3	1893.77	14492.8	4630.4	2618.28	56857.8	9527.71	1390.21	1597.05	577.766	115899	38.7179	116437	2508.26
NEG	M121T47	121.103	47.062	49666	35880.8	61564.1	150069	44376.5	87656.4	169350	75479.5	88550.3	109026	90684	139720	133173	129558	74719.6	49653.9	107927	33357.2	48203.7	66038.5	38588.1	34012.7	116231	205988	67469.4	56498.2	63040.2	62463.3	107747	124256	61347.9	120080	143296	94130.6	63096.1	89956.9	92804.1	67355.8	91921.4	79679.8	82070.6	24158.6	93859	134096	97597.1	119309
NEG	M121T79	121.103	79.4725	27166.7	21735.8	37466.2	43790.3	14587.2	39073.9	78391.4	39102.2	48617.2	57601.8	49281.3	83401.1	84069.6	61327	36379.7	23003.1	62376.4	18633.6	25797.2	24321.3	6849.94	16672	62696.4	87661.1	38790.5	28344.6	44859	33442.5	48942.5	33614.1	10401.2	78035.7	69307.4	56558.3	39731.4	46363.4	50095.1	43003.3	20326.3	27999.8	41845	16003.9	46949.1	20348.7	51763.2	62160.1
NEG	M122T201	121.944	201.379	8492.17	5542.83	3996.89	4602.9	3913.14	437.517	2550.37	6634.41	4521.62	3740.44	4653.97	4900.73	3327.93	2342.22	5077.93	4603.29	4173.36	4892.23	3792.95	5958.51	5882.17	9545.06	7610.74	3563.52	7385.76	6681.15	4356.64	4634.5	4975.79	5001.08	5707.65	3910.03	4401.04	5140.68	13100	4700.39	3438.64	4604.58	3084.69	3512.2	3181.12	3498.42	4326.87	3671.82	4761.85	9129.59
NEG	M122T13	121.943	13.286	1689.39	1826.02	3398.33	2395.84	1460.7	1661.9	2734.95	1496.18	1927.88	2082.09	1718.01	1817.85	847.589	2837.35	1743.43	3302.84	1733.11	1700.56	1774.59	2384.1	5401.44	1854.84	2637.13	2653.23	2133	1052.39	1611.53	2848.73	2948.65	1654.58	2646.83	1684.82	1759.33	2266.19	2059.91	2380.79	1437.83	2293.37	1818.17	1611.61	3568.02	1654.37	1256.74	3153.7	3493.22	2862.34
NEG	M122T238	121.943	237.969	3481.3	2411.51	2450.7	4069.94	2526.73	1831.22	3058.31	3049.2	2052.28	2341.19	2168.2	5784.57	2407.72	2797.67	2517.25	2568.99	2452.79	2824.88	2167.07	2584.32	3229.65	2445.19	2262.97	2029.97	3075.49	2388.48	2532.31	2435.34	2449.21	2536.85	2954.94	2038.9	2563.55	2457.78	2501.67	2607.12	1943.22	2220.14	2246.82	2377.26	2659.14	2503.32	2524.93	4508.52	2363.77	2019.38
NEG	M122T282	121.972	282.478	1267.9	632.505	365.374	2055.5	679.329	1309.98	1473.61	1349.76	495.129	1066.02	515.451	716.26	730.905	1174.66	1133.86	757.589	842.743	1219.65	622.094	724.474	859.451	698.418	1355.3	754.647	766.075	651.254	616.543	842.638	954.281	878.72	649.059	551.468	2031.99	862.796	964.463	859.877	671.496	940.423	508.523	1214.03	862.856	728.635	1310.92	977.691	912.839	585.997
NEG	M122T272	122	272.372	26155.1	32029.7	30346.8	40374.7	33891.5	31183.7	30509	33783.6	39352.2	30762.4	31057.1	30226.5	36891.5	49789.2	33563.5	35041.7	28746	31459.4	33176.1	28258	33842.5	33516.7	34147.9	37519.9	32188.5	28867.2	31524.4	40930.3	34051.6	38800.8	31417.8	28011.2	43736.8	33375.2	25907.6	42250.9	24660.8	33422.2	34800.5	30481.2	34118	37297.9	35249.2	35625.1	48204.7	34490
NEG	M122T369	122	369.286	13063.8	17349.9	6022.88	18774.2	12770.5	6007.51	11433.3	9513.7	14175.6	10249.4	9842.05	9919.34	12269.2	21853.9	9680.92	16222.8	13273.5	7723.2	16690.9	7749.81	6678.25	13223	16293.5	9776.85	15422.4	6298.15	19133	13122.5	17186	18470.7	7640.79	9259.26	19928.7	17030.1	10289.4	13973.1	12141.5	15797.4	14967	10746.5	10754.9	8742.67	4784.7	11463.6	14468.1	17461.5
NEG	M122T132	122	131.823	3768.66	37604.1	2543.72	3838.94	3289.89	3167.31	1067.03	3803.37	5917.68	4285.15	3127.52	2234.22	3450.82	3541.46	4501.86	4098.52	1240.88	3509.65	2342.33	1272.85	1324.66	2857.76	1050.98	3188.94	1750.19	3557.59	2456.64	2121.1	2786.82	2789.08	1693.83	2708.79	7358.62	2437.62	1351.38	1582.03	4225.54	4484.55	3867.84	1801.31	2274.9	2562.08	4375.03	1969.1	2948.26	3039.03
NEG	M122T246	122	245.827	3623.63	2194.26	4703.63	4841.24	4823.53	4726.66	4124.07	3253.4	3492.28	3094.39	3194.7	2774.22	3193.01	2654.02	2980.03	4093.98	4749.53	3969.49	4461.35	3122.73	3168.51	4280.87	2795.89	5599.86	2606.7	4745.29	3591.64	3699.97	2644.86	4767.98	4232.57	4767.1	3231.71	4302.76	3663.14	3507.18	2470.62	2762.02	3712.43	4289.27	5110.69	4463.93	3487.34	4200.27	5112.5	4044.57
NEG	M122T342	122	342.478	1530.13	2774.68	1936.04	2869.96	3729.18	2468.32	2936.92	2928.71	2540.34	2246.95	3142.42	2328.88	3261.52	5458.75	2859.79	4037.55	3080.29	2471.84	3587.28	2320.82	3888.43	2933.55	4625.46	3979.34	3259.48	3165.98	3301.63	4016.39	4377.73	4344.53	2367.98	3030.22	2748.75	3656.64	3393.96	4604.65	2521.78	4019.65	4141.21	3275.91	3541.21	3517.51	4046.29	3928.36	4222.54	4531.59
NEG	M122T350	122.023	350.116	7085.61	8557.8	6125.34	6893.81	7654.33	8636.81	6892.97	7951.86	3694.2	6114.44	9567.45	5321.11	8559.55	1751.11	9023.2	6412.62	6703.87	7024.17	8647.85	9237.56	6104.61	6790.7	8338.47	4596	6945.69	6031.34	7471.7	3589.43	9888.71	6649.79	5329.59	4662.35	8072.46	7282.19	6548.91	10299.6	5579.76	7165.58	4740.93	2463.02	6201.38	9794.32	4705.07	5473.79	4733.37	7764.4
NEG	M122T294	122.029	294.497	19103	6053	9079.21	3682.67	1814.65	1910.58	5992.22	22326.3	11789.1	1508.84	8460.29	483.099	2552.8	1748.42	11575.4	902.96	1212.48	2958.68	9259.45	2251.44	550.123	743.829	2839.73	8183.5	8510.66	612.461	3028.28	6796.29	7523.89	3439.08	7455.55	1884.87	7194.7	6935.34	11888.3	2455.51	7134.41	23665.2	26095.5	1476.01	2779.83	1718.84	1802.14	6141.78	2427.71	8365.5
NEG	M122T109	122.034	108.713	11664.7	1.10693e+06	12018	15116.2	8256.28	9096.83	10211	10721.8	13619.9	11851.2	12195.8	8023.76	11070.3	14595.2	13060	13140.2	12831.7	15205.8	10498	11729.7	8894.18	77509	14764.2	14022.2	9240.72	11379	10835.9	13607.1	9979.06	12301.4	12609.7	10245.2	23463.8	11248.2	11735.3	12185.8	9364.66	11546	29267.7	6862.01	1317.93	7647.95	11515.7	13773.3	12922.2	12075.2
NEG	M122T48	122.037	48.235	6539.7	4420.99	2721.77	12377.5	2340.76	15213.7	4139.33	4152.96	11446.7	3278.45	9728.54	6490.62	5217.36	16271.7	6409.56	5988.84	7472.36	5162.51	3778.55	6488.11	3999.27	6436.54	2609.28	7661.31	698.382	9116.46	4699.82	5438.91	10448.4	7723.37	5311.14	3794.95	3435.3	13355.2	9691.15	7297.41	6702.73	6775.18	2277.44	4129.04	5714.73	3245.83	11125.6	5438.26	8911.36	11948.8
NEG	M122T29	122.044	28.8735	11343.2	1928.77	6540.9	5860.16	1085.93	3714.51	6637.05	5053.87	10579.3	6350.47	3920.93	5241.86	5125.99	6001.21	1336.39	2578.74	2243.56	3376.41	1413.18	3469.17	2211.97	1915.19	4395.44	9050.12	8307.92	3947.9	272.094	6643.81	4032.99	6925.39	7185.23	3157.03	3281.15	11168.7	9880.03	2804.43	4226.16	5792.61	2767.61	5622.16	5948.99	5850.98	8428.63	9844.84	9180.18	9393.66
NEG	M122T15	122.062	15.038	1714.24	1724.9	4077.4	5044.58	2762.14	2611.55	1850.78	5570.84	3132.24	4332.39	3613.32	4508.52	3442.54	1902.39	2168.19	1939.87	4217	5804.07	4081.69	2482.08	6466.36	1170.34	3930.75	3843.91	2624.68	2874.81	5525.76	6719.48	3662.75	4452.24	2609.77	1789.57	3759.65	3667	3148.6	5336.15	7897.81	6122.9	3809.83	3230.59	3547.44	1270.65	4364.26	4180.78	3711.61	3209.75
NEG	M122T148	122.062	147.606	22537.5	14136.7	20732	18579.1	21231.1	10938.5	15509.3	21944.1	47267	18620.6	19945.3	18057	15690.6	22457.9	42145.9	25116.9	14101	13702	21446.6	20132.5	21674.4	31254.1	27813.8	19430.5	17418.2	17007.8	16034.1	24066.2	21235	20015	20337.7	16319.7	36143.5	16245.3	36821.4	31363.4	11807.7	19831.3	30276.5	17205.8	30519.9	18136	24077.5	26678.1	26824.7	17215.4
NEG	M122T313	122.073	313.396	51949.1	34584.6	32537.6	50726.5	48517.7	28876.8	53220.3	45913.6	35630.9	46761.2	55145.8	53181.1	52574.3	63174.9	56715.3	62140.7	39219.6	40157.7	38190.7	51300.6	53625	44992.7	54615.1	49531.1	54902.1	39339.1	53786.7	57727.4	61781.4	61889.6	44622.4	50465.4	46161.6	50848.1	53286.2	58989.3	48392.3	55901.7	53708.9	51530.5	63510.7	43646.9	51119.4	54554.3	56944	62659.5
NEG	M122T80	122.106	79.61	5971.49	6641.13	2995.34	4792.94	950.134	4684.27	7924.23	2852.54	3781.01	5604.13	8336.41	7595.95	7388.65	6488.77	8112	8548.09	6061.41	5320.58	2037.02	1574.53	9425.8	979.505	4083.35	8702.91	3401.13	3545.88	4408.42	3154.33	3934.43	2984.56	11490	7904.27	9147.24	5889.91	6346.59	4436.59	4484.41	6428.79	10026.8	6374.56	8807.93	4870.43	7577	8747.56	4419.03	6442.79
NEG	M123T618	122.968	617.749	87034.1	81158.3	79013.2	39001.5	50527.5	25738.4	51382.5	34677.2	103243	66544.1	91306.7	89456.8	57412	121404	113085	90584	85603.1	81703.8	80969.1	38980.8	84526.4	65370.8	79165.3	88719.7	14366.4	32756.9	66497.3	75728.4	91605.2	82039.2	94528.5	84308.9	96446.7	76964.8	58256.8	93367.1	74618.3	97819.1	65964.4	71570.9	97386.1	46364.9	89654.4	87741.1	129601	95361.2
NEG	M123T358	122.968	358.092	132919	218254	196357	198941	144648	216299	200971	207581	203915	221491	201688	213615	146930	219774	202189	197120	217581	218068	209118	198729	206182	204717	201572	203952	200291	233035	217489	214457	197977	208131	182402	223953	143115	212654	203235	230832	156130	206658	199596	223358	210686	199787	204194	202745	209462	207383
NEG	M123T655	122.968	654.728	16693	11827.3	8404.09	9715.39	12935	6825	9541.14	8498.4	8551.39	5917.96	7562.36	8968.84	20214.4	13790.9	14328.2	8041.38	15483.7	14224.8	5717.09	10722	11014.9	6373.81	8713.14	9609.55	5593.16	12480.1	10314.3	10449.6	9019.02	8506.27	8934.41	8080.74	14142.4	6696.51	8325.89	13076.3	7609.61	8339.13	7994.56	10797.6	11890.5	7745.28	14412.5	10720.3	9546.08	10275.8
NEG	M123T690	122.968	689.809	8489.06	6546.58	5953.02	6965.81	10716.2	5627.29	5475.02	7628.17	7556.36	5977.31	7832.77	5942.46	7451.15	9690.93	10127.5	7384.05	6168.5	9763.47	7652.08	6844.13	6667.92	5114.35	5853.72	7007.8	5762.82	4396.29	6723.9	5826.48	12215.4	5689.32	5258.51	8378.01	6797.06	6583.27	8072.53	8048.56	4701.99	5913.19	7351.37	867.393	10958.8	5574.67	10920.9	23375.5	7482.13	7660.81
NEG	M123T676	122.968	676.28	6339.8	6034.39	6504.6	6791.99	7804.14	7425.44	8616.63	6534.68	8112.5	6786.67	6937.45	6084.23	10041.9	11184.1	19216	8702.29	7446.24	7345.89	10645.7	8505.21	10971.4	6077.14	6908.62	8977.38	7606.2	6352.03	7817.32	10417.8	6911.74	6570.73	7691.02	10410.4	8889.15	8429.84	8171.41	14275.8	7536.82	8869.52	8482.3	7276.78	7919.36	7291.64	11508.3	8641.52	9800.02	9683.15
NEG	M123T711	122.968	710.554	5318.23	6566.41	4967.93	5647.07	6395.95	4728.97	5929.16	5465.09	5811.33	4419.47	5400.22	5452.43	4163.19	7604.21	5138.8	8151.61	3980.26	4172.46	3260.16	5145.09	10082	5038.17	5158.1	5631.71	5591.32	3788.27	3781.41	4297.5	12385.7	5935.64	1332.12	4976.58	6165.94	4941.81	2668.4	4200.34	4752.19	4248.73	5074.8	848.648	2019.25	8083.66	3927.79	4500.54	4957.53	6665.17
NEG	M123T283	122.976	283.019	2830.03	5838.93	3821.84	4305.57	4769.94	3337.09	3840.7	4943.83	5184.74	3086.93	5843.65	5098.61	7951.47	10055.1	7745.2	8141.79	6260.33	4873.27	5045.88	7275.54	7431.6	5213	10551.5	5743.43	5813.77	4697.77	6095.5	6448.8	9000.36	7935.15	7004.96	4332.72	4201.31	6672.59	7179.33	8684.28	5003.78	7407.4	5903.14	4428.95	6246.18	3898.92	9324.88	7247.1	8584.28	5624.1
NEG	M123T44	122.976	44.294	59474.9	59951	45852.3	70898.1	41574.5	51579.8	57726.1	70111.8	85342.7	51858.3	63672.4	60867.4	72869.7	140033	50465.1	39598.2	56821.6	40761.7	56957.9	61570	52552.4	73245.3	61090.2	99956	55305.8	69481.1	44879.2	60019.6	66821	47221.8	43006.3	56031.8	28945.1	109143	108302	67369	58342.9	80334.1	38979	54737	44712.7	71612.6	63499	81436.6	81781.3	79408.6
NEG	M123T88	122.976	88.2105	535686	628967	423381	437714	756158	449269	217253	896548	563597	308081	755218	140638	646914	1.14052e+06	910631	643294	715401	544157	522098	814832	155985	320272	789164	204170	643199	846621	708082	777117	1.5095e+06	282433	183095	123182	352169	1.14954e+06	394814	821725	912318	706052	548399	895399	584857	420214	235482	602413	1.09523e+06	1.03103e+06
NEG	M123T272	123.003	272.378	1088.72	877.356	1566.91	1685.13	1375.53	1080.62	1308.98	1423.37	1844.7	1373	1459.04	1331.61	1459.4	2211.15	1407.28	1583.09	1235.97	1150.22	1278.41	1147.36	1416.45	1555.6	1386.6	1352.6	1493.15	1158.95	1677.58	1729.76	1389.97	1718.16	1093.51	998.579	1821.74	991.194	937.797	1598.6	990.721	1346.7	1555.26	1325.65	1448.19	1099.29	1323.97	1692.43	2058.18	1501.39
NEG	M123T24	123.016	23.6005	10791.5	26573.2	39544.4	32862.8	30832	23337.7	19061	17055.7	21675.6	6405.11	2205.76	39166.5	20407	26026.2	29096.3	18737.7	25854.3	14434.1	23511.9	15541.9	10881.4	30932.3	25529.4	12960.8	34340.9	22403.4	42137	7764.93	12728	31140.9	21733.5	47991.8	15259.6	12037.6	17150.9	10719.9	68752.2	42012.5	32190.6	13181.7	49159.6	26317.3	23609.8	27877.9	39542.2	35859.5
NEG	M123T309	123.032	308.866	554.212	654.873	1142.88	1415.35	365.501	1168	1061.52	768.067	1065.8	908.166	1050.04	486.872	1557.63	695.096	1211.01	511.934	496.933	946.449	916.265	944.983	607.284	438.252	633.189	476.755	1233.99	1056.6	498.279	1173.66	1041.01	1131.03	919.606	974.382	854.017	600.824	985.314	1187.57	922.988	1215.78	632.599	424.2	641.017	433.665	1207.4	1160.11	1194.63	917.706
NEG	M123T428	123.044	427.949	10410.9	436.296	3197.94	4227.93	3069	9062.59	4906.72	3754.45	5889.58	4584.53	9200.13	15484	10502.8	7931.08	12432.8	11517.9	4513.79	5646.22	7565.85	7701.48	12148.2	4296.1	6489.87	10851.4	10190.9	6233.89	4897.57	15837	16098.9	21033.1	4879.94	13924.2	460.157	5368.2	7946.01	17905.3	15826.3	10560.3	6635.04	17063.1	8970.13	4881.19	16763.2	9296.39	5239.78	6774.34
NEG	M123T106	123.04	105.563	87839	71626.5	7832.36	10363.6	122791	91038.5	113294	136936	144795	93951.5	184576	144991	167977	11063.1	247841	183052	190343	147318	128389	3669.73	22606.7	4567.49	274572	12134.6	159504	133493	176555	197834	255735	221628	143312	121915	35272.4	181302	210683	229789	154516	178891	143606	148643	4743.66	139939	197106	161416	182858	154913
NEG	M123T47	123.045	46.892	50934.1	69773.5	14064.8	38521.4	11332.8	5003.68	22629.9	25762.8	24885.3	9846.19	67876.8	17542.7	71372.1	106911	56587.4	41355.7	14183.6	47386.7	51254	64555.5	40918.5	13097.5	68389	35334.9	14839.5	16841.1	684.182	66215.3	13883.1	10049.1	11375.6	19908.8	21184.3	14129.4	90278.4	31084.5	59866.9	72289.1	16865.4	53048.2	7866.06	69181.9	64904.8	63084.9	23777	18842.5
NEG	M123T23	123.053	22.722	185178	32041.1	137539	95199.2	31359.9	16051.2	104577	48358.2	62194.7	127970	100484	22121.2	39334.3	104366	62083.4	13200.6	25847.8	81863.7	173545	156737	12335.4	30184.3	19960.5	106447	166870	38614.3	20508	146821	92094.5	123912	75031.5	21586.9	39810.4	168666	61735.8	15241.2	65581.1	54592.5	39688.2	52047.1	14281.7	7943.77	93070.5	18067.3	153185	44148.2
NEG	M123T209	123.057	208.973	2039.82	2174.58	2276.46	2437.29	2616.86	2819.26	2177.36	2036.79	2399.21	1871.75	2548.34	2560.79	3927.53	2821.85	2731.82	3105.15	2674.79	2749.98	2684.3	2665.09	2540.1	2151.14	2439.99	3961.93	2096.76	1947.61	3093.91	2626.34	2768.29	2421.33	3019.63	2151.91	3191.62	2206.53	2560.52	3076.37	2372.43	5378.47	2368.39	2464.2	2803.78	2219.12	2677.47	3745.93	2798.15	5923.53
NEG	M123T314	123.076	313.549	3499.48	2094.3	2216.28	4383.71	3224.04	1834.19	4066.83	3263.3	2508.19	3558.42	3909.96	3693.41	3773.56	5052.84	3256.32	4048.35	2176.88	2876.05	2826.05	3794.41	3834.39	2374.25	4021.14	3557.95	4248.45	2017.16	4247.95	4227.28	4937.44	4465.81	3070.17	3746.07	3289.85	3096.37	3602.92	4462.75	3809.23	4412.1	4109.04	4038.69	4487.9	3033.15	3390.18	3560.9	4105.28	5069.13
NEG	M123T112	123.093	111.688	2407.76	2177.57	9903.09	1722.4	3218.81	6140.47	4290.17	1030.95	2163.39	1810.73	605.829	1836.46	3820.94	20033.3	2214.73	1168.41	1436.84	8096.79	983.023	1242.75	1869.37	2010.45	3549.22	2822.43	2431.36	1519.97	1234.23	1475.14	2611.66	1218.21	1315.75	1212.94	3350.5	16138.1	4942.89	1440.25	1784.34	8780.35	2114.18	1513.56	3250.14	1953.32	6627.35	2275.61	4773.09	2237.94
NEG	M124T281_1	123.633	281.127	2000.49	2987	2017.71	2759.92	3105.78	1623.31	2494.96	2707.49	3729.2	1757.18	3003.55	2563.23	3937.35	5364.47	4983.69	5047.94	1852.63	3490.49	2648.66	2995.27	4598.72	3478.46	6677.49	4677.89	3554.49	2201.09	3423.74	3451.94	5662.26	5719.46	3549.65	3013.39	2658.11	3747.93	4189.21	5916.6	3092.75	3705.34	3613.14	3136.19	3910.99	2817.28	5055.89	2534.07	3417.02	3487.54
NEG	M124T77_1	123.633	76.768	8557.22	548.938	5588.11	1568.01	3190.65	1351.48	2374.38	1538.1	975.832	159.986	0	0	33.31	207.013	33.061	108.832	60.8672	146.771	0	0	0	0	0	0	122.212	0	0	0	0	0	0	0	0	278.915	168.864	33.5048	778.046	0	0	0	0	140.651	227.974	31.3158	126.486	0
NEG	M124T29	123.909	29.3465	11154.4	15208.1	3020.13	12835.7	7388.07	4621.32	4367.97	2682.36	16487.8	3485.33	0	603.156	1920.99	1325.36	100.735	492.824	240.696	2333.87	0	79.0987	0	0	0	2816.27	203.141	982.149	0	0	249.917	0	0	425.643	126.2	12706.5	10224.6	2887.34	2297.61	2468.95	0	0	5135.32	9944.08	8363.09	13079.6	13429.4	11907.6
NEG	M124T186	123.95	185.738	2441.28	1115.97	2174.96	2309.14	2857.61	2509.6	2299.97	2837.9	2672.78	2427.07	2075.2	2506.77	3332.47	3104.88	2650.72	2283.81	2273.88	2317.41	2020.91	2143.47	2390.68	1963.86	1881.16	1662.18	2130.49	2642	1883.94	2779.68	1841.48	2629.18	2139.98	2811.95	2593.11	2295.99	1609.83	2746.74	2704.66	1443.24	2060.47	2298.99	2838.82	2507.74	2700.52	2516.77	1692.13	2595.07
NEG	M124T359	123.971	358.761	1241.06	2335.7	9559.45	12768.8	671.776	1927.22	2232.11	13714.6	11460.3	5857.71	1556.18	1578.73	1402.61	2209.88	1481.74	2898.94	874.878	1384.92	3001.2	1625.3	6022.66	2865.08	2971.56	2223.61	1337.38	4324.12	2209.97	2418.29	1670.38	2239.85	2686.79	11911.9	3136.31	7059.97	2213.44	23219.8	1419.67	1521.59	3846.11	8237.01	2078.01	2218.15	2267.34	9882.75	1382.42	1549.25
NEG	M124T332	123.981	332.459	3718.06	4091.25	3928.57	3496.58	3972.8	3571.38	3346.79	3717.84	3636.78	2490.85	3300.44	3819.96	3884.32	4460.54	4249.2	6044.94	3379.28	3556.39	3332.16	3586.04	3365.57	3685.75	4020.06	4072.08	3322.33	4544.74	3530.54	4748.01	4027.91	4882.91	3822.8	4314.39	1370.12	3535.22	3819.01	5791.53	3472.38	4142.8	3457.27	3900.69	4889.05	4168.08	6689.29	5287.02	3626.92	3642.95
NEG	M124T352	124.002	352.05	70830.8	82492	77803.1	70005.7	74575.2	78421.4	84289.1	88904.3	81425	78082	83985.1	80025.3	88939.5	105220	87357	82905.8	84584.5	80779.6	80718.2	73868.4	75127.1	83295.9	83328.1	78737.7	77548.1	60698.9	88433.4	74824.3	72115	89323.3	77715.6	72812.1	77169.1	81539	88609.8	93697.8	74332.5	83862.9	78135.8	82572.5	90203.1	78679.1	80198.8	73412.7	85895.5	84372.5
NEG	M124T281_2	124.009	280.981	820593	1.40156e+06	1.01915e+06	1.19611e+06	1.22771e+06	938990	1.01221e+06	1.11577e+06	1.31128e+06	799705	1.56791e+06	1.44503e+06	1.84548e+06	2.47488e+06	1.9956e+06	2.21926e+06	1.61086e+06	1.30124e+06	1.33395e+06	1.57592e+06	1.99988e+06	1.39301e+06	2.6652e+06	1.71104e+06	1.50755e+06	1.38464e+06	1.37711e+06	2.05322e+06	2.60025e+06	2.15007e+06	1.46053e+06	1.27669e+06	891457	1.54788e+06	1.95326e+06	2.35058e+06	1.42317e+06	1.75793e+06	1.70117e+06	1.35607e+06	1.61482e+06	1.53512e+06	2.49636e+06	1.5568e+06	1.73911e+06	1.54324e+06
NEG	M124T77_2	124.008	77.155	3.54853e+06	133074	1.93854e+06	1.32512e+06	1.08329e+06	602965	1.54878e+06	574297	573632	60536.6	11465.7	47805.6	58214.5	83046.6	37712.1	61481.7	45551.1	37523.2	7651.66	15123.8	15734.4	11998.5	17568.2	21115.1	58457	15799.6	7598.67	9178.75	22533.7	8968.97	8456.44	42840.4	791.767	113733	108142	69281.6	231088	17145.8	65542.2	23758.8	20449.1	71589	109959	40012.1	84185	28993.6
NEG	M124T122	124.008	122.138	10459.3	12316.7	15916.5	14190.3	16596.6	19373.5	15211.4	11588.3	24204.3	7339.03	10763.4	9444.84	14033.4	32153.7	13645.7	14246.9	8840.8	15901.9	9557.34	12227.1	11853.8	12272.4	13111.9	19099.2	10072.8	13194.9	16254.6	14489.3	13579.6	15372.5	17802.9	14153.8	9899.26	37498.4	24721.4	12781.4	25572.9	16084.7	11250.7	6441.79	13306.5	12330.7	25326.8	31318.6	21891.9	13704.1
NEG	M124T309	124.016	309.027	13597.9	16400	13836.5	25246.8	18201.6	19694.7	14886.2	14944.5	19904.4	16409.2	15066.7	15094.5	26622.8	27970.3	14398.4	23505.7	13996.4	14061.3	19161.5	9732.76	37616.4	16314.8	14999.1	20622.1	19568.8	17220.6	18007.9	20892.3	15461.9	15747.6	29060.2	17267.7	30428.7	15416.8	9217.34	19077.5	15295.7	19025.2	26739.3	11994	18642.7	15450.7	18530.2	33331.1	21708.4	14364.4
NEG	M124T23	124.024	23.082	1335.35	6852.47	6758.58	7988.75	14629.8	5461.6	5954.62	5573.39	11231.7	1397.43	13594.6	8165.83	11155.9	67538.7	10889.7	5863.14	6968.43	3602	1539.45	6466.07	16808.6	7420.32	24521.9	21406.9	38073.3	12368.4	14569.9	1128.97	30019.4	3191.08	13986.3	9712.26	3783.44	11659	8875.96	11757.1	18821.2	69257.8	6543.04	3500.71	98091.1	1103.88	7667.82	18019.6	52024.9	23430.7
NEG	M124T120	124.041	119.63	10461.2	16827.9	15028.4	12849.4	15940.9	17883.3	13617.6	10137.8	21741.7	6497.96	16302.6	14073.7	11427.1	29994.5	12970.3	12985.9	11565.3	15680.9	8743.5	19968.9	12217.6	11318.5	13953.6	26078.8	12413.2	7477.82	15066	13914.9	11053	16365.8	15970.7	13090	10941.4	19929.5	13468.3	11506.9	10525.9	12572.7	11988.1	17236.2	23188	13343.3	13079.2	31759.3	16786.5	14709.7
NEG	M124T376	124.04	376.471	2725.58	1425.97	2186.31	2212.58	1591.83	2234.78	1251.2	1734.48	1733.37	1414.86	1359.97	1441.17	1996.22	1648.69	2034.62	1715.04	1733.17	1878.53	1668.47	1788.14	1781.7	917.091	1623	1743.66	789.962	982.824	1400.31	1374.56	1586.45	1226.15	991.249	1737.84	1430.51	1827.46	2193.62	1738.69	2170.45	1902.43	1032.41	1430.25	1137.87	1880.18	1617.29	1412.3	2241.6	1918.2
NEG	M124T22	124.056	22.174	13799.9	2221.62	8996.9	5143.36	1906.27	728.541	7812.39	897.703	3865.38	11940.5	7054.63	916.833	2591.09	7282.35	3808.7	0	2161.01	7070.32	9926.17	9201.37	0	41.7854	2552.67	8683.82	10586	2989.77	377.097	7775.76	3380.11	7437.44	5195.65	528.348	1851.8	6754.57	3259.81	498.882	3481.28	2770.43	3020.88	913.784	123.398	58.4444	4461.85	799.526	11267.9	3138.51
NEG	M124T250	124.076	250.081	381.993	169.692	540.333	262.976	381.16	320.427	673.254	568.697	1631.12	299.481	915.819	467.17	588.97	467.929	861.268	761.653	1422.78	402.629	335.541	527.217	500.11	430.022	1089.17	755.331	682.352	467.504	855.853	539.913	341.472	519.951	560.499	799.536	243.257	416.553	611.126	824.44	335.43	500.605	395.373	312.864	390.701	476.64	542.673	705.857	856.207	529.55
NEG	M125T359	124.972	358.768	1319.11	1080.56	1233.73	3905.31	976.322	750.779	819.741	689.737	1345.67	825.67	1224.21	473.898	646.018	1012.42	1143.13	771.853	1250.3	3450.32	1088.25	1181.08	875.589	3202.02	1300.35	1460.24	1390.33	1017.97	757.855	1409.91	711.833	1202.67	1272.6	921.088	987.636	955.092	690.786	1006.56	654.274	777.226	964.771	818.82	690.765	715.778	422.231	1431.07	974.698	870.99
NEG	M125T191	124.992	190.501	69542.5	59199.7	64108.6	71209.7	69627.8	63401.5	81257.8	81338.4	73502.8	76146	88116.8	77346.2	105513	92943.7	115786	88484.2	82407.6	82752.5	52834	96940.6	77178.3	86548.8	73826.2	74178.1	74890.8	59844.4	78524.3	100892	86648.4	96929.3	88406.5	76704.1	97851.6	67516.7	100049	105682	64180.4	99879.3	80483.7	92025.6	103369	73046.1	84060.9	94274.3	100090	69743.7
NEG	M125T32	124.992	31.998	10091.4	30197.4	7922.26	10351.6	3786.42	6496.86	5874.41	8138.03	5818.39	3759.33	18041.7	17462.2	120889	8267.38	5438.47	11521.8	4070.04	5904.51	3297.16	3698.08	2879.16	7657.88	7144.6	11380.7	6707.73	4051.69	4905.37	3588.15	6352.07	42820.6	20509.9	6985.58	15529.2	6224.83	6769.38	8103.37	4673.96	24069.9	84540	13245.5	14531.6	4592.68	1764.08	42262.7	3205.69	7030.72
NEG	M125T281	125.011	281.06	17113.2	29461.2	22116	24629	25869.7	20808.2	21578.2	24482.6	28658	17916.1	32450.2	31425.8	41792.3	47958.7	41005	46570.5	36395.6	30510.1	28483	36547.7	45532.2	31061.6	52496.2	38575.5	33489.7	28898.4	31444.2	42582.8	51256.4	43607.4	31467.8	29949.2	19234.1	34566.8	39997.9	48139.9	32343.3	37395.4	37222.4	30238.4	32431.9	31330.6	53001	36021.6	39690.3	32947.3
NEG	M125T78	125.011	78.1935	52988.1	1113.23	29510	21692.3	18554.1	9754.01	25194.9	9470.75	11085.8	7404.15	9045.51	8942.23	10066.9	15861.9	10476.2	832.32	8844.34	8794.39	8058.32	10022.1	4561.83	8667.98	12234.3	11066.8	9680.76	6124.27	8065.87	9186.19	12934.2	10687	9011.87	8305.46	8594.22	9615.36	10463	11056.4	1455.05	10443	9362.35	7451.78	9721.51	8298.42	9205.25	11654.3	10864.8	8775.27
NEG	M125T311	125.018	310.82	3812.8	4229.87	4908.03	2440.54	5553.86	5695.55	7170.46	6692.75	4098.75	6983.2	9427.59	6901.12	18486.4	5881.21	6961.91	20530	9051.45	3902.96	11893	4394.45	6066.68	4957.49	6635.21	6927.07	6416.08	7654.57	4341.26	20586.1	4731.35	8690.54	10951.5	8276.6	14619.9	3361.11	6181.19	17449.1	6551.77	4528.58	16811.2	6820.34	6790.89	4578.62	7955.15	9704.79	7079.1	6139.63
NEG	M125T103	125.025	102.861	5288.91	6276.1	5951.22	16170.2	5922.93	16901.6	8335.51	7814.28	7277.37	6520.86	10154.6	6952.49	6261.46	30700.4	9819.03	10180.5	24782.2	5901.51	7224.62	8307.81	6693.25	5478.56	9072.99	10559.7	8965.86	5586.64	6697.74	11852.4	9925.52	8996.22	12720.8	5173.69	9069.53	7452.74	8647.32	9274.58	7235.2	7391.9	6963.52	6136.54	7370.18	6159.23	7842.25	6982.04	27803.9	11646.1
NEG	M125T22	125.032	22.38	42646.9	2429.97	4328.99	335356	12627.1	4694.68	993.164	1299.57	6948.09	1270.15	43680.6	57901.2	13338.5	211515	3765.72	18081.4	54459.9	14593.2	4904.9	9595.17	11283.7	7512.46	44402.7	44585.8	60827.4	46477.5	11372	2107.63	73024.5	4564.53	33594.9	39843.3	14524.4	7815.68	20022.3	23093.6	660596	223076	32636.8	3452.36	244355	2453.23	628.192	17327.5	216705	44302.7
NEG	M125T294	125.025	294.497	11038.4	11506.7	13452.3	14472.5	6783.22	5218.07	6867.83	12352.5	14953.5	14934.3	16706.7	9340.57	6909.9	13490.6	11581.5	6917.86	13300.3	14442.7	10721.7	8622.37	12451.8	11891.7	21871.6	15977.1	7968.22	9694.31	7056.68	15933.5	21405.4	8857.86	7255.57	17047.3	10107.8	9646.24	17714.3	14532.7	11500.1	14228.5	7668.3	16577.8	7759.9	12591	11748.1	6988.73	7466.58	16326.3
NEG	M125T139	125.036	139.167	27020.8	20400.5	29389.5	33824.2	21631.9	17715.3	22945.2	24998.2	24074.6	22043.7	20188.7	24380.2	25342.2	36615.3	19587.1	21046.7	21326.7	17880.4	25383.9	23178.4	11706.2	19091.4	16973.7	32980.8	28572.8	19512.4	19404	24641.4	23248.1	23609.8	24087.8	25637.4	26059.7	33373.9	23143.2	25646.3	22276.1	28226.2	22342.8	25796.2	29271.7	20616.7	23060.4	47700.3	33765.3	24989.4
NEG	M125T357	125.036	356.716	5981.99	5952.91	5592.81	5153.72	5775.42	5640.27	4082.27	5655.51	3938.3	5290.45	4569.09	4978.18	1626.48	4065.48	5115.7	5437.81	4111.89	6056.09	5216.48	5216.15	7031.16	6081.25	5154.49	5391.42	5897.17	6397.13	5285.4	4368.52	4337.44	5292.51	8184.7	4897.08	8213.01	5924.03	5768.22	4795.17	5632.97	5219.72	7506.96	6981.61	4587.54	4026.42	4349.6	5408.86	4598.92	5960.11
NEG	M125T258	125.036	257.788	13572.1	7129.94	6377.05	13777.6	6086.42	6289.64	6981.86	6353.73	15407.7	7464.21	5266.28	6683.4	8193.99	8186.48	8343.65	8107.12	1291.36	17341.9	6706.91	9011.82	7872.11	11368.7	9926.12	10518	7577.82	15102.3	7285.41	5232.92	9168.53	5787.75	11181.1	6155.62	8222.79	9121.77	12756.1	5873.26	7856.97	7205.93	9053.29	6091.56	6464.48	12462.8	5540.24	7046.09	6465.57	10796.7
NEG	M125T116	125.047	116.455	4269.01	7022.23	5945.65	7151.02	5866.84	4420.51	3714.16	2631.02	2176.13	4097.91	1906.27	5240.41	1742.26	7916.58	7078.85	1981.86	2081.76	4067.81	1390.79	4166.39	4863.38	5456.75	10357.2	2871.01	3340.93	5656.24	5838.45	3538.9	1894.5	9058.62	3824.82	1016.71	4422.45	3963.35	9850.01	1324.51	6092.89	2184.31	6949.22	3211.92	5776.66	6634.42	8225.53	7277.93	4820.03	5957.61
NEG	M125T284	125.061	284.411	2896.37	3223.68	5105.56	2622.2	8255.27	2493.76	7002.85	4362.48	3239.41	3349.56	6258.47	5364.45	6822.98	2689.85	3074.34	6485.09	3694.26	6304.7	2049.45	3786.36	4069.49	4705.24	826.65	5193.88	2491.93	6295.27	2942.46	4397.86	4547	8279.68	4945.37	5451.94	4271.82	1822.32	5371.29	5430.47	3345.39	5592.66	2163.04	7229.67	4478.8	4030.83	4235.03	5730.16	4424.47	6519.81
NEG	M125T197	125.072	197.153	1669.26	893.931	2221.62	2338.62	2121.7	904.677	2318.85	2400.01	1937.16	1826.35	2664.03	1489.61	2178.03	2358.13	777.201	1969.37	2690.92	2379.16	2271.58	1842.85	2445.19	2250.25	1947.06	2396.65	2006.19	1766.96	2092.05	1709.7	2526.06	1853.85	1427.51	1376.63	1561.47	1425.71	2836.09	1695.01	2121.71	1879.92	945.134	2927.85	2868.51	2838.8	2645.56	2797.5	2389.38	2190.2
NEG	M125T378	125.072	378.303	887.956	642.512	746.88	637.016	942.84	657.973	471.131	967.539	1113.79	557.002	445.365	554.004	599.041	521.927	1431.09	510.864	593.972	343.528	618.023	706.989	791.401	559.614	808.484	597.728	675.406	503.796	783.214	561.648	679.064	543.49	784.462	773.733	704.51	723.356	435.943	537.894	513.619	619.073	675.181	518.731	814.322	756.874	1310.8	589.907	497.594	481.198
NEG	M125T449	125.109	448.953	554.261	414.711	1245.5	560.606	1038.63	881.884	389.848	1109.69	743.095	437.596	639.181	586.393	964.746	590.633	707.954	606.539	479.377	437.099	475.869	547.733	433.895	462.708	539.714	531.555	568.503	476.307	533.323	739.779	378.024	613.201	472.293	793.92	465.178	486.368	379.411	670.093	533.392	566.53	681.276	480.526	689.215	377.949	840.943	857.922	640.431	378.769
NEG	M126T29_1	125.907	29.438	6877.71	7424.8	3196.17	5395.33	3852.13	2893.04	2357.53	1735.17	8602.91	1387.42	2373.28	2132.87	2822.35	1635.36	4837.84	4158.11	2187.92	3050.95	1873.46	3529.75	2697.25	2303.66	2980.44	1437.46	3124.45	2397.66	3028.19	2855.33	4296.28	2286.69	3214.39	3019.54	3365.64	7866.19	5445.58	2912.22	1777.13	2896.36	3045.86	2424.06	4595.98	7252.6	5263.23	7233.65	7141.47	4448.73
NEG	M126T642	125.929	641.659	14566.1	8673.48	8570.01	6071.17	5036.31	3861.35	11167.3	6725.93	9641.44	5250.22	6667.37	5029.05	9462.45	12383.1	9277.32	2792.35	4813.1	15841.5	8467.48	9566.36	6097.14	1914.04	10828.9	6380.7	20178.1	6958.39	5875.6	8035.77	10814.7	9363.5	1423.09	5563.09	19543.2	6445.8	8096.44	10114	7379.35	1409.27	1095.14	1067.95	4214.41	5836.25	8239.33	1796.4	17735.1	11369
NEG	M126T701	125.929	700.937	4835.33	5540.21	7127.35	6125.37	7900.53	11562.6	6827.69	21545	1569.1	8711.26	12283.2	12730.1	1428.11	13442.1	6105.68	8795.03	5478.14	7292.92	2609.76	10307.6	14021.5	10571.9	14092.9	7045.94	6568.22	5306.22	21541.5	10268.4	8045.08	11134.8	18842.1	11247	6764.67	6791.69	7161.84	8337.89	5355.08	8145.09	7832.41	7500.82	12906	10324	10037.8	6890.24	7380.51	6760.67
NEG	M126T687	125.929	686.947	11567.8	4917.32	6627.78	2816.15	5507.59	5433.22	7882.43	25934.1	2133.09	4233.85	7676.59	4203.33	9911.86	5137.12	10563.6	11960.6	6830.97	4093.75	10384.3	18579.3	7622.6	10766.3	5132.88	9841.26	1437.22	6175.55	6315.31	11270.3	6502.2	5596.1	4582.8	7914.81	8807.98	7205.49	10098.8	5829.06	8615.87	15838.6	6754.3	6067.88	2445.25	13704.9	5248.98	8121.73	8755.79	7012.37
NEG	M126T714	125.929	714.28	15406.3	10026.3	6564.98	1156.3	4046.25	4888.44	6931.72	6384.48	14435.7	810.399	1621.32	5236.38	9275.07	6991.03	13837.2	5852.17	8711.68	5921.36	6207.51	6522.3	7026.21	9162.38	6484.84	9740.9	5995.23	6977.82	7612.17	6793.91	5265.85	1971.76	7327.81	5384.42	9124.46	1488.92	6362.38	8500.57	4389.47	6751.29	6855.34	9290.88	13068.3	2763.41	1316.62	5619.93	6929.96	8389.01
NEG	M126T671	125.929	670.648	6524.03	4955.85	5754.14	3779.58	10600.9	5795.33	4280.28	10205.6	3288.41	8150.84	7543.78	12555.2	5027.82	5340.23	4758.77	6826.02	9543.42	7259.88	994.462	13225	3908.02	5502.55	13134	6823.8	7153.21	11805.9	8223.29	1112	15124.3	10235.5	6685.15	6483.55	4150.98	5239.01	8951.43	5266.74	7785.58	5308.69	6136.63	4416.79	21787.5	10351.6	8794.18	5379.74	11729.5	6559.92
NEG	M126T612	125.929	612.491	9297.37	4563.79	1342.39	28329.4	13793.5	6571.6	18428.5	5677.87	15918	7232.3	6881.57	3315.33	4387.42	8472.67	24528.8	7478.94	3355.4	25720.3	5477.71	14547	26446.3	402.587	17083.3	5140.01	786.588	4159.27	6581.54	4934.42	57427.7	11165.6	7693.47	8706.54	9949.59	3308.69	11678.2	11206.2	16074.9	14203	12599	20684.3	8876.93	14544.2	5629.19	863.175	796.77	681.072
NEG	M126T589	125.929	589.329	1333.98	1503.73	1788.47	3359.4	212.288	2181.29	6716.08	4940.15	2073.1	3750.61	4539.18	5921.26	2007.41	1936.22	9805.84	527.901	3829.22	1785.07	5085.96	4820.57	6362	4390.82	8550.05	6885	4760.92	3994.57	4231.57	5173.9	4259.44	1753.45	3685.36	4351.42	5616.61	3147.79	1214.19	2734.97	5130.91	6270.61	5189.12	3752.99	2595.91	3714.41	1787.6	4737.08	4045.78	4242.03
NEG	M126T29_2	125.936	29.075	28988.8	6638.12	4459.07	3254.7	3099.78	25593.5	3675.75	4245.66	12374.2	3247.35	3094.32	3789.97	5618.23	6021	18316	7237.55	3259.85	4157.64	4132.26	4185.74	3317.97	3512.63	5907.93	3990.47	4169.14	2105.75	4749.24	4836.99	6332.31	3182.14	3991.8	3230.36	5837.35	13452.3	4998.2	7262.19	1741.93	5259.79	2575.49	4088.91	2125.7	2085.27	8236.09	3681.55	3086.72	3649.97
NEG	M126T186	125.947	185.822	2220.15	2387.36	2569.68	2223.33	2928.22	2307.68	2722.87	2730.53	2541.27	2686.52	2216.17	2323.81	3031.95	1327.04	2538.21	2780.06	2328.11	3121.53	2418.07	2049.25	2197.76	3175.72	1766.15	2688.76	2557.53	2354.92	2728.8	2683.68	2340.91	2338.51	2822.46	1492.15	1987.37	2091.33	2282.81	2795.23	2871.23	2414.52	1054.09	2685.3	2740.36	2475.59	2328.08	2273.65	2313.27	2559.97
NEG	M126T22	125.958	21.69	6047.18	1537	8968.8	16411.8	805.319	3716.32	7284.57	6882.29	4477.55	7689.74	10029.9	2080.47	1298.51	9074.41	2035.62	2133.58	3744.04	5704.1	3283.04	551.593	1537.63	2801.79	4103.96	4812.36	5853.95	2422.07	1238.83	7829.36	8953.11	6569.37	4203.85	3603.32	2163.42	3924.73	1384.04	4067.63	31715.1	7139.47	4085.39	3040.88	21276.9	3761.62	10018.2	7617.9	10535.7	3118.73
NEG	M126T191	125.995	190.897	1032.79	2438.45	2304.85	1379.46	1008.32	2811.79	1495.93	1174.92	2797.12	2819.11	2963.14	2553.57	2369.41	2030.33	2513.18	2458.99	2480.1	1657.51	993.32	2877.61	2184.59	2858.63	3077.9	3181.13	942.748	1265.59	2381.61	3722.19	2052.77	3690.62	2475.69	2695.46	3214.95	4104.45	3493.43	2955.57	2593.48	1474.57	2692.45	1451.15	2036.43	2515.12	3346.93	2967.27	2543.27	3016.75
NEG	M126T281	126.004	281.011	28289.3	52015.2	35160.2	40206.4	41926.7	33196.8	37244.7	37043.2	44494.2	30725.6	56816.6	50708.5	62685.7	83592.5	66623.9	77262.2	56768.2	51267.3	48112.7	53143.1	69836.9	50587.4	93074.5	59090.7	58754.6	54606.1	58707.7	69622.8	88731	70209.3	60204.6	49217.9	31556.9	60698.1	67415.3	81482.3	57266.6	61787.4	57306.9	58192.8	60455.4	49138.2	84710.8	52933.8	58302.2	58665.1
NEG	M126T139_1	126.003	138.627	5432.19	3643.32	12965.6	4964.08	8443.12	8590.06	6376.53	19062.5	15731.3	4038.47	13615.5	23218.6	19295.9	11913.1	31664.5	32825.4	18100.2	42344.3	11408.6	28045.1	6782.43	8988.84	12375.3	10095.3	6443.3	5563.7	9634.69	9879.8	16860.3	15380.4	17611.2	25133.8	4153.53	8879.79	15960.8	17844.3	7936.25	13462.8	20134.9	8575.09	16434	19022.9	12719.4	17841.7	10079.7	4171.55
NEG	M126T77	126.004	77.116	146367	5860.61	82224.7	58722.1	47988.9	27766.1	68825.7	27010.4	27187.1	2871.64	5340.1	4517.39	4847.38	6100.2	5317.11	4530.43	4671.8	4668.76	4932.4	5079.34	4083.87	4662.09	4528.82	5537.26	4807.16	4434.4	4243.2	4661.46	4805.8	4952.62	5044.68	4127.07	4776.27	5683.8	8305.62	4847.19	12302.3	6698.31	4715.72	4751.83	4875.89	5371.52	5984.03	5765.41	5863.24	4842.28
NEG	M126T359	126.018	358.656	6867.77	8518.05	7014.3	9868.58	7018.35	6690.56	7457.13	6181.05	7094.82	6663.64	8515.29	7980.71	7620.96	10966.2	6533.87	11898.8	6544.13	6602.01	6177.6	8161	7683.06	6846.34	6059.56	6592.34	8438.97	5694.99	7421.76	8610.91	7325.93	9839.73	6327.06	7940.33	8964.65	7078.54	7836.56	11180.7	5909.24	10429	8186.75	8447.49	8360.67	7047.21	8370.65	8197.42	9053.69	8765.9
NEG	M126T240	126.02	239.683	15005.8	12869.6	15824.7	17101.1	22335.4	7732.26	9642.44	15604.7	15828.1	8119.27	9276.21	7988.88	13117.6	12699.4	13368.7	9999.45	12177.2	11925.2	11297.8	14580.3	14027.5	6106.86	18193.3	13194.1	15554.2	9082.39	14591.2	10626.7	20907.7	11070	10059.6	17504	18985.8	7961.42	19466.2	21011	4982.47	14936.3	20255.6	15272.3	12476.8	12570	18762.9	8717.34	9744.25	18039.6
NEG	M126T286	126.02	285.509	13109.4	20086.4	9766.01	21534.1	25919.2	22008.3	25088.9	22814.2	25271.3	25479.3	34725.3	7767.34	20564.2	30108.1	19378.1	30046.7	75512.2	24587.2	25463.2	10032.9	12111.7	6564.17	117105	49072.1	28500.6	16526.6	21858.8	9912.61	16627.2	15342	22014.2	22413.2	56547.1	23532.7	28608.6	15157.7	21264.7	24918.1	25965.2	22224.9	14619.6	22955.6	103664	29964.9	13917.1	25598.4
NEG	M126T14	126.032	13.747	1998.95	2093.05	2344.93	10456.6	2062.98	3155.87	1850.19	2318.07	825.242	2254.44	1673.3	1877.15	1856.22	11621.5	1525.77	1886.73	966.444	2431.78	1995.27	1373.68	1397.31	2262.43	1643.95	2195.54	822.46	2165.77	2014.37	2221.84	3590.73	1739.7	1705.36	2154.25	2013.07	1928.23	1326.81	1568.89	35901.1	1832.01	1890.2	1946.55	911.038	1470	1922.75	3612.39	8455.54	675.826
NEG	M126T139_2	126.039	139.106	345.359	257.816	301.776	422.401	300.365	2116.62	351.131	471.034	219.761	647.301	3258.25	5080.9	371.813	495.95	285.04	5901.24	4611.39	11624.6	333.433	293.59	701.722	216.086	2919.86	2280.49	1049.12	1276.98	1625.59	384.14	2935.76	304.984	4141.17	333.314	292.678	344.35	3587.03	196.835	291.082	375.366	308.784	509.244	3955.15	3615.99	2641.85	593.652	320.665	311.778
NEG	M126T414	126.057	414.129	2934.48	1334.64	2740.66	2396.91	1973.52	2699.15	3088.74	2488.8	2535.42	1771.62	3312.51	2826.21	4118.05	2986.93	7661.95	2680.7	2425.46	3093.29	2425.54	3596.14	3507.23	2488.75	3055.16	3159.03	2045.33	2731.98	2936.68	2577.3	1945.75	2212.48	2694.76	2671.93	1595.19	3047	2368.6	1569.35	1842.73	3032.64	3375	2218.82	2345.03	2864.49	2816.92	3386.06	1756.4	3012.15
NEG	M126T341	126.057	341.129	525.77	607.453	313.486	656.239	586.31	641.565	868.838	338.631	758.616	709.041	722.52	573.617	587.792	528.702	881.961	717.334	682.582	476.673	683.102	690.997	701.521	664.481	703.053	590.526	719.22	576.206	694.692	654.624	465.793	664.317	788.799	575.393	795.585	802.053	701.614	527.191	590.701	713.206	646.413	577.696	619.996	557.684	724.366	720.229	692.774	669.363
NEG	M126T383	126.068	383.166	640.461	211.482	573.034	540.787	542.969	502.952	683.951	426.308	523.489	384.419	192.37	375.318	201.591	481.069	243.585	325.822	381.11	328.851	233.462	204.42	190.666	198.394	283.376	191.277	286.684	193.378	192.295	248.81	314.171	247.645	215.572	420.88	199.75	422.84	368.119	441.16	387.478	130.556	319.071	208.257	216.6	402.725	393.31	248.088	448.705	212.298
NEG	M126T317	126.093	317.13	750.314	785.722	3069.33	1086.11	2443.91	1803.76	1379.61	2305.96	1503.83	655.582	1454.41	1689.43	1527.89	961.728	1846.05	1193.88	897.007	815.742	1140.88	1381.37	1039.56	676.848	916.529	1982.71	769.207	1459	1615.44	1439.45	717.07	1403.75	1806.75	1220.82	634.624	506.4	900.516	1149.19	893.213	1141.99	2097.69	571.287	1430.12	1669.96	1796.99	2006.69	1008.39	447.608
NEG	M127T25	126.913	25.478	100053	123176	168779	250920	392460	116586	179704	108541	156730	92551.6	126023	203486	246239	275455	101184	212589	86628.2	119513	114832	115610	124447	121608	112472	99271.4	93576.9	120145	111283	100372	123919	84790.7	126700	150747	163326	106096	96065.3	215526	94291.5	152213	88040.8	366615	79877.3	74008.8	90113.7	1.69927e+06	102193	3.31109e+06
NEG	M127T29	126.961	28.687	1929.61	5421.1	468.862	1526.17	1057.25	956.831	2200.31	617.391	1473.13	770.206	1185.17	2282.38	1317.2	3223.11	3356.65	2088.06	1751.88	1952.79	1137.44	1526.29	2478.71	2825.78	2173.88	682.125	998.094	1711.81	976.611	798.534	1130.22	809.501	1614.63	1934.37	4261.3	832.298	3078.88	1834.76	539.024	1385.05	2902.2	1464.17	967.484	1234.74	1207.19	1779.91	1102.65	816.813
NEG	M127T244	126.976	244.474	1865.24	1312.82	2000.73	2108.36	1440.68	1658.23	1347.62	2044.68	1753.18	1333.12	1879.48	1383.82	1240.56	2029.02	1743.98	1822.84	1472.54	1344.76	1646.73	1547.76	1528.82	1972.5	1861.09	1891.47	2183.08	1211.85	1806.69	2074.6	2600.15	1868.16	1384.06	2312.77	2288.75	1705.05	1469.07	1250.63	1556.11	571.835	1477.7	1365.88	1785.57	1348.18	1679.32	1795.04	1927	1705.12
NEG	M127T191	126.988	190.697	2652.72	2074.35	2474.97	2522.64	2843.66	3901.39	3374.27	3611.19	3452.19	4045.54	2860.71	3877.22	2053.63	3001.74	4317.76	3024.09	5098.52	5354.59	2778.87	3645.09	1352.05	3127.78	3440.25	2905.62	3289.96	3236.11	4696.57	3803.82	3173.2	3302.72	3084.21	3592.69	3864.94	2651.71	4120.8	2737.46	3337.63	3512.33	2641.23	3347.64	3393.17	1899.45	3536.39	2107.3	4585.97	2180.17
NEG	M127T75	126.996	74.953	28280.1	49187.8	10160.6	382376	12186.3	10545.4	37094.4	92759.5	1.08508e+06	7917.03	21813.5	179477	55173.1	147599	269425	13089.5	12900.9	1.948e+06	10466.5	87682.2	9755.42	10670.8	18026.8	118484	64798.8	52605.5	10231.3	90265.6	46969.4	12482.6	13099.8	167271	18784.7	12701.2	267045	12169	621808	1.96773e+06	11516.6	10281.2	13189.6	9302.16	11126.8	41602.8	83467.5	90901.1
NEG	M127T351	127.002	351.439	60567	65408.5	61671.7	67669.1	56772.6	56203.2	63687.2	67167.2	61892.4	56371.4	65082.1	52872.9	72329.4	78676.7	65524.5	63069.8	59224.9	56160.5	60529.9	64233.1	61544.3	57414.7	56639	59101.1	66142	54780.4	49773.5	67994.6	58879.3	60711.3	61034.9	52014.6	55174.4	58643.5	69031.5	75375.9	51466.1	65764	57290.6	59512.4	74685.1	51964.3	62011.5	58328	71711	78392.3
NEG	M127T107	126.996	106.52	12659.5	19189.5	10899.1	197804	10929	8085.45	21667.6	42367.6	485086	7118.84	16234.8	76979.6	27208.5	6780.21	153905	12598.5	13222.2	841124	10877.7	38747.7	11121.8	9540.06	11562.6	58360.8	26542.3	23860.2	8109.93	48482.2	22535.4	13821	13843.9	82877.3	19232.7	12208.7	138687	15736.6	298429	895304	11912.8	8504.18	16677.3	7429.1	13466.9	68092	42629.5	29099.1
NEG	M127T281	127.007	280.98	520.336	1190.6	692.548	714.621	964.941	1451.42	584.019	837.619	735.019	477.431	1198.33	1378.09	2287.98	2152.18	1751.11	1385.92	1573.29	1080.81	1278.84	1396.11	1785.64	1543.93	1456.33	1115.65	2752.33	849.842	1758.14	1152.43	2963.22	1490.16	1379.44	936.469	1322.42	1464.55	987.319	1554.45	1079.03	1852.12	1089.8	1548.03	2125.45	891.738	2122.59	1081.22	1915.48	1127.31
NEG	M127T14	127.027	14.396	4320.33	5117.77	3483.45	2004.5	5284.61	7743.85	5364.36	5844.28	5545.31	4230.85	5465.38	3843.26	4530.08	5566.44	2622.39	6358.6	4108.18	4172.86	1266.33	5136	3999.09	4874.82	5524.34	5241.5	3859.03	3869.06	4431.38	7259.76	3749.76	5597.26	8690.41	2078.1	7211.75	6516.62	6729.61	6615.05	5097.62	1739.8	5960.81	6632.86	5552.2	8548.99	4981.56	13373.8	9169.57	5344.98
NEG	M127T714	127.027	713.67	3192.29	2828.22	3332.3	3278.03	2487.93	2499.1	3486.37	2753.21	3053.21	2501.13	3030.63	2355.83	1416.14	4007.46	2930.72	3953.9	2955.3	2480.44	2939.69	2590.34	1874.29	2756.39	3466.13	4516.75	2774.39	2660.85	2638.12	2599.07	3618.78	3745.48	3414.09	2008.75	4085.7	2909.75	119.719	3412.52	3340.49	2893.59	3048.74	2504.91	3252.65	3393.89	106.156	3375.51	5148.53	3166.54
NEG	M127T50	127.027	49.581	4134.24	4970.65	3747.53	4112.65	5077.33	3433.29	5068.29	4897.13	4324.8	3595.99	4015.38	4295.11	3884.54	5389.93	4671.11	4066.01	3729.4	15812.3	4610.84	5812.57	1645.47	6081.08	4885.54	4397.23	5813.71	3384.86	5585.87	6060.23	6825.3	5673.59	3166.03	3280.64	7743.94	3836.36	4417.73	5292.67	3372.01	4017.49	4651.13	4012.6	3712.44	4047.43	4524.45	13080.2	5517.68	5868.86
NEG	M127T356	127.052	355.996	98437.4	149845	149992	117353	124867	86999.9	90868	138629	149059	99639.5	128993	88479.9	58242.8	65092.5	88471	107276	140279	130204	120949	100488	111375	95747.7	151263	80016.8	127217	93291.4	86143	72955.2	155649	149644	132549	82356.8	228253	137821	175214	80020.4	71887.7	110167	188957	127905	86978.3	79338.4	95685	100178	142022	91960.4
NEG	M127T208	127.052	208.298	6607.67	2714.73	7087.5	7161.1	5556.13	12452.5	9945.06	6133.25	3856.21	8068.98	10417.8	3104.76	4111.07	7850.18	2889.94	2611.63	6629.29	4691.6	5911.14	3066.3	5525.09	2285.77	3237.4	12951.8	6735.59	2976.01	6889.15	9908.41	9099.92	7676.31	5492.67	3198.69	3480.47	7323.99	980.6	2689.55	4820.38	5105.92	4987.52	6098.17	7221.2	5887.75	8900.31	8191.38	14594.9	7420.89
NEG	M127T298	127.052	298.046	33747.8	12619	20345.1	22788.1	9633.87	18734.6	22328.9	19445.5	16279	19005.1	16332.4	15422.7	14060	17594.3	8707.6	13643.4	8090.76	10235.1	13325.4	15438.2	15780	11485.4	18772.3	24090.3	17873.8	15003.5	6991.25	14776.5	19155.1	5404.17	7479.98	12907.5	15970.5	33306.2	34303.7	12898.7	19594.3	19401.3	16707.8	11381.8	24708.7	20520	26471	34566.2	16544.1	30123.1
NEG	M127T328	127.052	327.758	15995.8	24260.4	17254.3	15293.9	13148.3	11617.1	15354.5	16521.1	15436.6	35003.2	15488	13155.4	11037.4	15290.2	19746.4	16561.8	15526.3	16109.9	14694.7	20070.5	27283	38001.9	11520.7	15609.8	18003.1	18690.2	14248.5	14251.2	15919.7	15690.4	29204.8	12738.9	29047.8	17017.2	16483.9	12988.4	13542.3	17798.1	19448.2	16018.7	31342.6	13392.3	16952.1	20976.2	9430.93	16282
NEG	M127T10	127.077	9.782	1578.68	1571.42	1319.8	1748.69	803.023	2655.95	1836.7	1491.97	2101.56	1136.45	716.011	1788.03	970.943	953.995	1674.5	1934.83	1390.62	1442.12	3181.39	1409.6	939.053	1490.05	1691.61	1701.5	1569.36	1607.7	1725.9	1528.17	1760.89	1808.46	1928.5	1594.71	1870.19	1750.48	1693.3	1837.94	1466.62	1657.65	1368.58	1672.24	4132.89	4316.65	1942.53	3556.31	997.4	1000.61
NEG	M127T229	127.088	228.818	3508.73	1465.34	2313.17	1711.23	1344.62	1674.04	2247.64	892.786	2491.91	1925.84	707.797	1201.05	1354.63	1533.27	1387.37	1252.09	1704.12	1669.66	1256.48	308.278	842.703	1325.48	664.368	2684.34	566.254	1150.67	1492.01	1477.15	1588.5	1418.82	1417.88	648.656	520.772	4120.57	4691.95	1662.88	1433.51	2062.68	583.53	1311.28	4544.5	3993.26	4371.7	6324.19	3642.12	3644.95
NEG	M127T377	127.088	376.825	1446.51	2353.75	2587.98	1170.5	972.475	1987.67	1114.6	926.776	845.178	981.789	2289.01	646.969	2849.45	882.451	1369.71	587.215	709.783	479.295	1857.05	2710.01	1264.84	1701.58	1041.76	2616.48	2348.39	1517.46	2450.73	2038.9	1974.87	1165.85	1641.33	823.352	2027.85	680.919	904.295	2328.16	2252.44	2541.35	2931.34	2188.85	2982.55	756.2	693.346	1790.74	1498.14	1997.9
NEG	M128T282_1	127.649	281.627	1966.23	1611.29	2764.96	2132.18	2021.67	1814.71	1782.29	2270.91	3356.54	1448.04	2121.03	1930.21	2638.23	2668.26	3382.15	3082.44	2362.39	2149.52	1957.59	1841.47	2392.52	1999.64	2730.67	1947.42	1825.81	1210.52	1665.08	1397.2	3063.39	2184.09	2115.57	1994.86	2585.61	1543.04	2775.36	2771.68	1325.12	2078.73	2624.51	1859.76	2752.74	1889	1855.86	2300.33	2523.45	2197.93
NEG	M128T352	127.997	351.513	32868.7	30585.3	34656.4	39463.6	23236.3	35013.5	49952.6	35162.3	30429.3	26926.1	41607.9	29549.9	40025.5	42420.6	33253.7	30155.3	27097	26784.5	27553.5	44509.5	33244.3	33112.5	33046	42226.2	40324.5	25473.7	26477.8	48654.6	27388.5	32990.6	31690	28887.2	34800.8	34012	53966	38565	28976.1	46089.7	32430.5	27228.2	35795.6	30710.9	31142.5	32792.7	38677.4	49723.7
NEG	M128T74	127.999	74.065	9207.58	14524.8	14885.2	32140.1	6170.29	6620.8	10496.4	10294.2	73632.4	8727.4	8680.85	13840.8	7678.38	11619.2	22216.6	10828.1	7654.49	130376	8419.44	9091.17	7666.51	9406.43	10383	11254.4	8611.02	8974.13	5897.92	9125.69	12150.2	9286.46	10442.5	14131.5	16906	10614.4	21412	9659.01	46579.5	123646	8262.8	6480.53	10242.3	7555.87	11364.9	11283	11044.4	9662.68
NEG	M128T106	128	106.232	5679.2	9823.15	7674.57	15223.7	6195.66	3968.73	6611.46	6474.79	34238.8	6760.56	6309.26	6957.38	6344.84	10017.7	10307.7	6824.04	6858.23	61513.7	6472.33	6133.41	6195.3	7506.97	9008.7	7269.09	7624.98	5554.01	6211.57	6958.75	7391.44	7063.21	8142.15	7431.45	39099.1	6240.39	10868.6	6621.99	22769.1	63520.8	7199.17	5498.29	7662.09	6395.56	6472.96	8466.84	7115.13	7776.95
NEG	M128T129_1	128.018	129.308	4691.45	4383.96	9613.13	6378.67	6447.66	2473.74	6096	3997.89	9911.63	5087.14	13077.4	16596.1	7638.59	6462.11	7633.36	11959.7	13374	6655.53	5078.85	14826.9	7513.61	7497.09	9885.88	2896.27	6194.32	3657.8	5075.03	9375.35	7799.14	10002.9	12536.7	13734.1	18402.9	11606	6559.21	10659.6	9050.18	9961.5	11451.7	8638.96	6407.62	9092.5	7211.9	18231.6	13842.7	5754.49
NEG	M128T282_2	128.037	281.642	684229	603431	846159	743031	723014	845573	644906	847611	1.26798e+06	736829	683554	808630	883131	1.03966e+06	1.17156e+06	912947	725045	1.01531e+06	912037	744501	817299	657059	835799	670731	796695	503752	701088	587490	822861	755105	711666	850448	884555	655426	843070	1.06427e+06	571243	801212	948268	649657	1.0371e+06	938145	783840	895867	799443	821679
NEG	M128T377	128.036	376.905	37048.9	58654.9	49770.5	56960.9	58978.2	46788.3	56574.4	60768.3	50218	40501.2	87022.5	67818.3	162274	116374	74445.4	79151.2	58867.2	83163.5	82998.4	87738.9	109854	112453	98457.3	63481.4	70457	44660.7	64224.6	67487.9	61411.3	67944.1	50984.3	76780.3	92522.9	53833.1	75788.8	112710	49580.3	89962.3	111655	42058.3	75827.3	78471.2	59994.6	82859.1	96281.1	114038
NEG	M128T355	128.036	355.457	36435.5	37805	39340.1	65166.5	32764.1	36127.1	34962.4	33078.1	39563.4	40574.5	32124.3	32972.7	23578.2	26576.6	28353.5	36685.7	28507.8	29930.2	49932.8	37252.3	39731.1	59336.1	43019	26394.4	45198.4	34716.5	36670.8	27888.9	37910.3	35381.9	47265.4	31079.2	54921.4	35314.8	38264.8	31040.4	27754.7	39032.6	49091.8	35709	34209.6	29084.3	43039	38143.4	34423.9	33634.1
NEG	M128T37	128.036	36.578	20820.1	4960.16	20161.3	15265.4	1747.66	11982.7	46825.7	10408.2	25711.2	21778.4	12332.9	5504.83	23013.6	13848.4	8638.26	9556.03	8758.36	5030.92	9037.15	6962.52	8861.76	8388.47	11590.3	29366.8	17813.7	20557.9	1294.79	6621.52	5212.34	3656.73	6473.38	4343.51	10226.1	46874.8	17788.6	4146.33	19046.1	27296.2	7372.8	2772.95	21336.2	19215.3	34782.1	52923.9	30367.8	31957.7
NEG	M128T191	128.036	190.99	15762.4	6681.14	7417.32	8189.93	8608.71	8013.5	8318.55	7800.3	7470.48	10050.8	6782.06	14988.6	11597.3	8261.27	6732.92	6823.17	8227.3	8362.83	8633.35	6710.44	7151.37	8045.19	7406.8	7855.35	7341.68	12073.9	7095.99	7669.56	6664.87	6572.82	4943.57	8496.03	6239.59	15517.3	8346.04	8227.89	9155.14	10755.7	6009.66	6929.23	13106.2	10937.7	9171.24	14943.9	8338.85	8706.51
NEG	M128T241	128.051	241.358	2985.97	2108.11	3117.58	2294.56	3131.55	2124.52	1861.26	2618.75	1503.52	1790.05	1909.52	2222.45	2929.35	2548.8	2366.9	2993.09	1396.28	2151.16	2010.23	2122.6	1859.73	2298.17	2770.03	2346.95	3247.96	2760.93	2521	2416.63	1684.28	2125.29	2876.38	2067.85	2917.76	2580.85	2853.28	1959.78	1511.28	2619.6	1532.58	2029.79	3176	2361.33	2858.32	2798.84	2063.7	1810.57
NEG	M128T356	128.055	356.103	4770.61	4187.98	4564.02	5948.1	6071.1	4492.55	4005.8	5321.06	7987.88	4891.36	3423.16	4025.57	2594.94	3965.15	3639.96	7307.78	3530.1	3689.88	6306.72	5726.81	4231.35	6198.88	3618.51	2228.8	6308.02	6359.38	7196.06	2824.1	3885.76	6106.39	5476.61	5668.24	5413.41	7328.01	5618.47	2667.07	2795.63	4940.47	6647.48	4674.06	3161.5	5294.31	6245.26	6210.69	6519.39	4160.62
NEG	M128T298	128.055	298.296	1205.12	1755.84	1047.94	1035.79	1007	958.562	568.594	1304.65	1508.19	907.037	1563.35	1166.09	551.261	575.127	1109.1	1506.23	1263.64	1182.84	1399.4	606.934	1270.34	357.022	779.011	1534.17	1874.85	1802.71	706.688	1240.79	1370.5	829.304	942.711	1048.19	2555.52	1046.25	1223.59	519.252	688.713	840.941	1145.53	1023.41	783.04	1499.78	1477.34	1246.53	738.105	1053.95
NEG	M128T292	128.072	292.423	12562.3	6739.95	10215.9	12471.9	4220.81	6250.4	11677.1	8427.72	6276.02	10855.1	9895.44	11500.7	8353.81	16211.2	8976.43	18398	9958.28	11385.1	17413.4	5169.33	8728.02	8051.77	11551.4	9197.08	8093.7	3946.69	5809.53	6869.24	8646.03	6236.33	4181.82	6245.67	8500.84	14654.1	12609.9	7690.82	13137.2	14873.6	8273.38	4398.55	21535.5	11297	13205.2	15478.6	6937.91	7177.4
NEG	M128T257	128.073	257.057	56394.4	57209	92915.4	93827	55922.1	34376.8	103840	80067.7	91704.1	49056.8	78835.3	41943.2	68211.6	221493	133756	175766	85982.6	167005	60948	43580.3	47089.6	95661.6	88997.4	45075.4	69523.3	71638.4	113015	147946	67985	67001.3	74602.5	41924	43544	123313	112917	163614	65355	166051	68181.2	43160.7	58394.4	90118.6	130801	48820.2	86781.2	91248
NEG	M128T129_2	128.072	128.802	138609	37647	168925	138144	16877.6	64797.4	114075	86929.3	126535	88641.5	98451.9	79764.2	166393	109071	23198.4	57791.4	25433.8	20697	48112.4	46292.2	73778.8	57548.7	95423.9	142276	63709.6	109799	8321.44	66914.3	108731	15998.2	11183.2	53544.7	66600.6	153306	151674	56014.9	58370.3	114160	58462.4	56107.2	217010	115049	191352	194207	149538	188028
NEG	M128T48	128.072	47.688	6489.72	13783.5	9598.7	10643.3	15589.8	8185.14	9997.9	7649.78	5228.25	8055.79	21003.5	7842.6	10360.3	5648.25	6932.89	11472.6	6585.36	5997.06	12555.1	7933.93	9314.16	6676.86	9201.71	10099.8	11825	10591.4	4710.35	15126.7	12036.7	9875.32	6756.53	6987.07	12369.9	6167.65	5574.96	8433.73	5572.67	6305.49	8303.91	10029.8	11354	7876.18	9436.87	10216.9	6802.83	6379.86
NEG	M128T295	128.109	295.102	3392.3	413.785	2486.58	614.006	997.862	1613.63	1099.42	1485.07	1184.41	3152.16	924.849	1015.99	1275.73	545.42	1297.1	1051.96	689.534	773.458	1376.06	621.539	904.453	380.923	811.193	1004.01	604.48	769.121	883.033	993.985	586.613	2603.72	1967.79	962.367	4207.67	463.637	428.389	811.877	4044.06	556.69	1574.97	990.199	1312.63	1053.85	1396.62	2066	540.99	353.014
NEG	M129T418	128.63	417.714	699.408	451.367	880.528	794.061	708.521	744.073	741.433	882.474	645.663	463.384	807.076	654.927	528.33	651.651	939.681	917.85	649.698	459.156	610.762	833.15	896.412	576.04	941.009	1011.21	463.375	666.877	760.59	1087.58	787.852	1141.81	695.777	423.84	389.915	840.93	842.259	997.368	630.498	762.746	737.238	502.569	860.622	614.17	1025.33	753.579	718.958	401.513
NEG	M129T45_1	128.666	44.864	27339.7	23658.3	84872.4	32799.7	32170.3	23271.5	28593.9	26425.2	27013.1	19980.8	32911.7	19472	31310.8	45184.5	32123.8	41067.5	42796.3	22620.5	26959.5	15936.8	10995.9	29382.8	30985.7	29352.3	46508.8	35246.7	20597.4	34605.9	56976.9	27513.6	36609.1	25828.4	37371.6	38945.2	42618.2	34805.6	23259.2	23702.4	43117.9	30871.8	35517.5	38554.5	32011.4	37247.2	22729.6	26420.9
NEG	M129T64_1	128.666	64.177	14738.9	19991.8	27596.5	23376.8	30930.6	20746.1	21393.6	19298.2	16687.3	18525.1	25046.8	18979.7	29150.3	20913.3	19821.7	23448.6	17484.8	18118.2	28683.9	19292.9	4278.05	11736.3	21357.1	22797.4	28797.5	20673.9	16721.6	37133.1	28233	25241.5	7543.72	17851.5	18766	17196	18303.5	24180.8	11192	21597.1	12244.5	22948.1	26492.5	14684.7	20333.5	11173.2	24993.5	18116.9
NEG	M129T29_1	128.674	29.288	11120.4	2224.96	19819	14836.4	1658.06	6316.13	14003.4	8998.92	10688.7	8228.02	6340.64	6724.41	9815.1	7470.67	750.113	2935.75	2653.32	2046.39	2615.38	3112.76	6453.01	1712.14	4882.04	10015	5723.99	8801.41	141.558	2419.2	5810.86	0	295.298	4396.77	4427.77	14808.3	10579	2586.13	4224.58	6773.44	3006.15	2510.71	11816.8	10814.8	15568.3	18928.3	22232.2	11519.4
NEG	M129T326	128.96	325.79	1639.55	5987.4	2034.33	5231.26	4744.35	1109.2	1887.75	1102.64	1681.4	1582.95	2048.77	2216.32	4961.51	1396.54	2618.16	2565.68	1465.54	1475.88	1895.55	1753.38	2540.54	2062.83	2297.5	2049.15	1961.38	1988.32	1447.47	1946.2	2072.73	3337.11	2123.49	1582.72	5843.3	5153.8	2237.44	2331.81	1718.42	1883.18	2327.2	1845.88	1746.12	805.001	3217.59	3048.39	2661.41	2308.54
NEG	M129T77	128.993	76.6805	6632.35	11055.5	12867.8	91291.7	11414.4	14708.2	18768.9	22452.1	246406	11623.9	18543.4	41907.9	11868.9	29375.7	52602.5	15230.9	15781.4	500695	9511.04	34534.1	9383.22	15176.9	18215.7	27603.4	16951.2	9200.13	14435.8	18691.2	11448.4	14737.7	13711.1	34874	15408.1	15752.4	68929	16872.3	149487	520320	14896.4	11092.2	15700	14594.3	16097.8	20338.4	23213.5	15378.6
NEG	M129T106	128.993	106.408	23773.3	5366.82	22410.7	64500.8	19148.9	16122.8	8575.2	13291.1	166984	17978.3	16689	26227.6	21823.4	17916.4	43915	24463.3	21224.4	294935	18489.6	25368.7	18317.3	22148.7	1391.94	24758.7	20590.4	7291.22	18009.2	14826.5	20193.4	24111.9	25860	28841.3	6648.35	23045.8	48178	26608.9	99250.5	306443	25674.8	19980.7	23515.7	16845.2	23227.9	22335.7	23663.6	10020.4
NEG	M129T417	129.021	417.263	234501	103489	279597	282842	256563	248335	271000	267486	318447	186875	308859	223666	215935	278270	363773	340898	243678	172216	199513	253809	233839	219416	306870	387533	337305	170353	276267	365782	324147	376919	291008	191599	98849.4	306582	319883	325239	229289	270539	218675	215047	247730	208200	357836	301813	309146	227318
NEG	M129T236	129.02	236.038	21453	22711.1	29535.1	75605.5	29683.1	42303.8	26692.8	28604	26239.4	51571.3	22877.4	22765.2	45158.8	37607.8	33413.3	28532.6	23080.5	25419.6	29555.1	23506.8	33060.2	20094	23517.2	26018.2	25274.8	21136.2	73957.5	80067.4	31945	34274.4	20627.1	56039.8	56641	23651.1	31098.4	32693.1	22493.3	32365	76876.6	60792.1	32851.3	65963.1	26201.4	35951	31870.8	27144.6
NEG	M129T373	129.02	373.037	12615.7	9556.35	16191.4	13066.6	13663.3	14102.7	15013.8	15278.2	17353.6	8680.02	20448.3	19618.8	29415.3	18666.3	25151.6	24368.1	16944.5	17328.6	16436.7	29862.2	18196.1	20300.5	40644.9	23857.8	16264.6	10884.3	22292	27244.4	20048.8	21602.1	16359.6	14223.1	10753.5	14075.6	17983.3	25123.2	15692.5	24565.5	18321.8	22637.9	16872.1	17355.4	34946.4	22215.2	18148	13185
NEG	M129T440	129.02	440.369	74452.5	20781.8	54406.2	64802	56509.7	63256.3	72464.6	52838.7	65754	43140.3	82158.3	64859.5	71221.3	79115.7	89824.4	79182.7	49393.6	48259.3	58709.4	70854.7	59224.6	43413.6	74287.8	93740.8	83813	49406.4	76537.2	78466.9	79993.4	91219.9	58990.5	56157.1	20216.1	73710.8	75210.5	77196.4	70465.7	75762.4	59982.4	67713.6	59516	51510.5	84371.3	76276.4	77277.7	64867.3
NEG	M129T145	129.02	144.895	99285.9	123891	90992.3	103744	87825.6	86401.5	79011.7	102480	92514.6	82413.1	97610.4	114429	97312.2	125124	91759.1	61189.5	103621	58410.8	104775	118716	49702	139061	95602.8	94332.7	101505	104470	98295.4	104104	91784.2	163668	101148	84142.8	100802	138760	99977.6	98119.3	69595.8	114461	70934.8	92241.6	111370	91600.7	87635.4	75245.7	88133.7	106513
NEG	M129T282	129.039	281.68	36679	32224.4	45015.2	36546.5	39887.2	37789.4	33687.8	42990.1	58839.6	34534	34157	35878.1	48986.5	50035.8	60132.1	49402.2	37477.2	39818.6	37077	34267	38486.7	34151.3	40520	35434.7	37665	23180.5	36774.2	34375.5	48457.4	38817.9	32857.3	34553.3	42964.3	34749.2	43876.2	54037.6	31153.9	43045.2	50966.4	36078.8	51437.1	39518.1	38630.3	44748.5	40374	38734.7
NEG	M129T377_1	129.039	376.865	12807.5	3236.28	4468.73	2587.94	3278.64	2296.36	3700.04	2938.59	2828.88	2138.03	4493.91	3601.61	8506.32	6709.58	6551.56	4204.65	3036.26	4231.86	4526.96	4042.23	4229.65	6881.74	5331.38	3760.8	2907.27	1603.13	3635.29	4316.71	3058.04	4097.05	2285.42	3173.31	4607.23	2400.21	3816.22	5415.41	2840.65	5012.24	5324.59	1980.22	4037.05	3936.93	36191.9	23323.7	5322.43	8282.74
NEG	M129T64_2	129.057	64.0035	6.91018e+06	8.145e+06	1.04177e+07	8.88587e+06	1.25287e+07	8.60629e+06	9.71456e+06	9.69407e+06	6.24996e+06	9.37521e+06	1.22537e+07	7.9174e+06	1.20676e+07	9.0016e+06	1.09604e+07	9.62004e+06	7.54216e+06	6.95957e+06	1.25974e+07	8.76997e+06	1.87478e+06	6.4755e+06	9.79762e+06	1.04289e+07	1.18999e+07	1.03472e+07	7.56295e+06	1.61784e+07	1.20946e+07	9.63572e+06	1.12016e+06	7.30926e+06	7.81009e+06	6.81861e+06	8.05106e+06	9.2299e+06	4.67857e+06	8.06332e+06	4.5369e+06	1.00053e+07	1.13372e+07	6.45256e+06	1.0217e+07	3.95683e+06	8.47781e+06	8.32404e+06
NEG	M129T45_2	129.057	44.888	9.54935e+06	1.98682e+07	1.38996e+07	1.13169e+07	1.26304e+07	1.06486e+07	1.13451e+07	1.0932e+07	8.8223e+06	9.50681e+06	1.27818e+07	1.05651e+07	12437343	1.26716e+07	1.31331e+07	2.40273e+07	9.08331e+06	8.05046e+06	1.26144e+07	9.7466e+06	3.51853e+06	9.019e+06	1.20224e+07	1.45361e+07	1.29221e+07	1.38539e+07	7595757	1.33111e+07	1.22364e+07	1.21992e+07	1.37078e+07	1.0171e+07	2.07948e+07	2.0238e+07	9.80143e+06	1.06899e+07	8.26943e+06	9.79729e+06	1.5621e+07	1.17828e+07	2.02232e+07	1.50707e+07	2.25684e+07	1.27389e+07	1.12354e+07	8.78022e+06
NEG	M129T288	129.056	288.464	20456.1	7611.52	55229	28296.6	78845.8	35917.3	26749.4	33563.2	20741.4	11895.4	29137.3	24129.8	43582.8	18964.6	32862.3	48536.8	22067.2	25858.5	51165.2	23724	61756.3	9671.37	18613	54218.1	38891.5	30523.1	17881.4	44019	27997.8	20911	30255.9	23649.1	11136.6	23217.3	23845.2	47356.5	14340.2	18547.8	15297.1	27932	56600	23228.7	32446.2	59939.8	22421.8	9716.96
NEG	M129T411	129.067	410.659	6949.15	7071.2	6184.55	5238.36	4159.05	6982.07	6655.16	6625.26	5070.28	6514.64	5861	7039.44	7386.43	6882.42	8068.01	5156.29	6892.69	6697.99	6426.67	6084.61	5459.25	6111.7	6301.95	6414.84	5175.09	5305.77	6628.21	7002.43	5698.67	9361.25	5921	7358.98	10238.6	6685.29	6896.12	5593.31	6803.67	5741.51	7317.06	7316.85	8395.24	5325.46	5988.38	6400.68	5373.66	6277.18
NEG	M129T29_2	129.064	29.2105	7.49839e+06	1.20149e+06	1.00286e+07	5.41178e+06	467551	4.02228e+06	7.70125e+06	3.71933e+06	6.30023e+06	5.03764e+06	2.57265e+06	3.25341e+06	4.71204e+06	6.41537e+06	251845	1.30779e+06	3287.75	770885	1.5653e+06	1.51923e+06	3.17748e+06	2287.06	1.81517e+06	6.54231e+06	3.16755e+06	3.91961e+06	74035.2	860758	2.91934e+06	63055.5	66547	1.9922e+06	1.88456e+06	8.12898e+06	6.7295e+06	883975	3.50157e+06	3.79971e+06	1.3101e+06	1.45598e+06	6.70763e+06	5.78233e+06	9.50075e+06	1.12831e+07	1.25967e+07	6.76602e+06
NEG	M129T377_2	129.067	376.541	10033.4	1127.2	8384.78	7636.38	7353.24	6248.34	8867.15	5465.09	6302.37	5787.34	4674.82	6604.52	4679.48	5136.17	6414.43	5442.51	3961.49	4419.45	1574.34	5575.03	6256.98	4108.45	6723.46	850.183	2997.13	3463.13	2200.4	5133.6	7052.28	2013.76	5863.33	7019.84	6281.41	5549.42	6426.49	5577.66	5171.35	4367.67	3808.04	2128.17	6279.37	5398.68	6672.33	6329.83	4934.93	2817.82
NEG	M129T257	129.076	257.101	3891.2	3998.42	5965.41	6297.09	3916.72	2602.02	7105.69	5772.87	6329.11	3190.9	5268.66	2966.9	4338.73	13424.6	7827.63	10844.8	5600.64	11063.8	4114.92	2772.91	3097.5	6512.12	5981.26	3045.04	4727.69	4730.34	7275.64	9991.99	5301.32	4238.51	4429.27	2668.69	2937.42	8615.94	7733.73	10495.5	4528	11321.9	4383.64	2736.76	3665.13	6315.57	8144.09	3323.85	5006.82	6202.59
NEG	M129T130	129.076	129.596	3468.89	1293.86	8437.26	10028.1	111968	3514.33	6159.39	3970.86	7340.62	3934.89	7004.62	4619.07	10869.7	7060.54	95223.5	142328	89418	1148.08	2423.95	2981.41	5343.62	3079.46	8910.05	9951.89	3488.52	4249.83	80245.4	119365	8740.57	90399	147040	101747	125978	10905.1	10411	3350.39	86625.3	5302.32	2101.54	3196.94	9144.09	7279.1	13325.1	13827.4	10196.2	13173.2
NEG	M129T374	129.104	373.687	1704.05	630.872	848.085	1067.91	1518.42	1141.65	1043.57	870.082	902.038	845.696	1039.33	1218.11	1553.12	1113.93	1624.3	1921.52	1153.16	1421.99	984.296	1350.12	593.417	1180.84	898.653	1222.75	968.248	509.184	999.466	522.61	976.151	1562.92	1432.22	422.249	698.203	1569.76	942.198	470.158	961.924	743.288	1662.78	1491.82	1382.72	1312.25	1402.08	2196.39	1058.46	1573.23
NEG	M129T15	129.093	14.925	18273.3	15827.8	18888	17002.4	7384.75	14673.3	4276.1	11903.4	13548.4	14518.7	10292.9	7516.33	12870.5	16432	14304.9	11507.9	14541	14897.2	12546.9	7758.66	18516.1	7456.88	13427.6	16762.1	21586.1	12709.8	15053.8	12384.8	12255	14145.2	12282.8	13534.5	16736.7	15210.9	16186.2	3590.57	14048.6	6634.38	14344.1	8571.5	15782.6	12967.4	12152.7	18041.7	12111.3	17036.8
NEG	M129T292	129.104	292.059	4106.15	18692.9	7247.69	8609.48	23044.8	6956.48	6541.22	676.498	4747.09	4205.59	6920.32	6021.04	15575.6	13753	7533.37	687.259	6530.35	7132.09	9697.68	8096.37	10309.3	2052.63	5533.7	8142.65	6755.72	6604.6	5850.52	6614.45	9749.83	4227.62	3905.56	7070.9	36445	5300.5	7617.64	11248.8	3941.52	5621.69	4883.69	6197.36	1709.4	6151.82	7010.23	13434.9	5193.94	6130.57
NEG	M130T247_1	129.694	247.258	2928.93	5489.8	7384.16	6600.73	4268.08	3078.15	4198.39	3792.78	3044.58	3004.55	5019.64	3999.15	8820.29	4363.42	5237.01	5460.52	2397.57	2712.79	3389.94	1852.28	4628.02	1897.73	4228.86	3793.45	4438.42	3228.6	3318.35	4597.78	4925.62	5843.53	4837.71	3214.7	6073.79	3554.85	3394.88	7566.05	3863.62	3440.28	4176.71	4456.04	6324.87	4504.63	6746.17	8730.88	5364.15	4203.48
NEG	M130T64_1	129.706	63.7175	950.53	2901.56	874.029	2591.2	4731.01	1023.79	2206.11	1211.25	1906.54	1532.39	1221.45	480.022	3168.14	1446.5	1222.51	3049.89	3196.45	1938.38	3353.74	875.626	67.9786	1284.55	2769.42	2727.31	1531.02	2326.98	2218.39	4195.2	1355.44	2406.67	380.708	2922.42	802.549	2558.26	2540.25	2878.74	1786.68	1059.24	889.557	837.607	2211.02	779.363	2204.21	832.182	2771.14	1832.91
NEG	M130T64_2	129.764	64.0985	1326.34	2368.16	1904.06	1496.57	1997.01	1832.76	1671.49	2163.63	1588.77	321.506	2591.04	1281.64	954.134	2035.08	2274.35	2303.98	1430.4	1390.21	2809.08	1110.42	0	1480.69	2022.68	2245.47	1337.39	1114	1571.77	2083.83	2322.43	2218.95	177.033	1396.58	964.527	1912.67	866.756	1098.34	1161.2	836.225	566.65	1868.12	1991.93	796.322	892.621	401.756	1594.7	1244.38
NEG	M130T332	129.968	332.315	1454.97	1304.03	1215.76	1597.12	1105.24	1067.81	1014.69	960.808	1064.96	946.295	1186.09	1110.59	974.196	1427.5	1521.42	1445	986.677	1105.01	1065.61	1279.13	1189.49	743.414	1524.16	1221.94	1350.93	942.951	1504.38	1502.51	1261.49	1427.44	1110.8	981.215	28625.6	1166.38	1440.04	1424.58	1301.64	1525.3	1437.16	1280.54	1408.31	1181.49	1649.97	1667.58	1185.03	1001.06
NEG	M130T320	130.015	320.055	1468.69	2620.2	903.077	1572.65	1089.7	902.494	1129.23	1244.68	9855.93	1371.89	1366.58	987.741	936.12	9354.52	1318.85	1589.02	1180.55	841.54	1203.03	1214.78	1587.95	1671.83	1672.2	1496.04	1656.64	1179.02	757.627	1767.13	1429.92	1166.12	1059.92	1383.04	4481.56	1689.6	1560.91	1458.3	1351.24	2053.36	1288.09	1203.68	1907.6	1597.82	940.922	995.634	1478.11	1343.7
NEG	M130T417	130.023	417.263	11471.9	5370.1	13586.3	13692.9	12723	13047.2	12697.6	13161.4	14681.1	8839.11	14578.5	12137.2	11359.2	13830.1	16906.5	15766.4	12827.3	8929.31	10203.6	12304.7	12889.2	10281.1	14290.9	19365.8	16436.2	8510.65	13671.2	17643.9	15170.7	17802.4	14828.2	10165.1	5328.66	15374.5	15451.7	15354.3	12074.6	13751.5	11323.9	10388.4	12300.5	10438.9	16866.6	14875.7	14614.3	11143.2
NEG	M130T236	130.023	235.945	1011.01	1732.14	1399.49	1138.81	1227.81	1781.33	1075.13	1169.46	1187.84	821.412	1431.78	1391.42	1938.86	1810.85	1533	1347.89	1099.65	1221.7	1259.59	1029.09	1343.15	832.013	1282.32	1401.07	1264.18	1265.38	1168.96	1921.69	1758.89	1536.86	976.293	1341.45	1433.16	1670.97	1026.25	1472.79	1541.35	1371.76	1428.65	1122.33	1262.09	1117.79	1155.07	1575.61	1364.14	1292.05
NEG	M130T280	130.025	280.281	580.793	3512.65	545.484	4490.58	4274.73	4170.46	447.164	5341.65	1084.16	343.997	4459.58	4030.4	6138.24	5595.09	6498.58	5683.89	3459.21	3996.36	4134.44	3893.43	3717.78	3027.79	4797.23	4279.43	4129.86	2741.16	3546.75	3654.5	4881.44	4161.71	3530.06	3748.65	4708.5	3590.65	5166.2	4746.07	2862.25	4708.47	5969.32	3253.6	550.27	3721.75	4831.15	5121.96	4611.21	812.297
NEG	M130T33	130.041	33.2635	94546.1	10348.1	106820	58149.2	4395.31	44857.3	79320.9	39422.1	277162	40770.6	32608.2	24304.5	54824.8	50821.1	939.457	6897.52	3528.65	4929.68	4707.34	12464.3	7920.23	13956.6	34283.7	119028	12642.6	28978.2	0	4304.85	34708.2	134.73	0	8951.67	17845.7	261357	170536	7760.63	27961.1	50182.1	10602.5	8093.87	112445	90628.6	175412	209484	179770	151329
NEG	M130T282	130.041	281.786	3084.13	3149.99	9575.42	3832.23	3717.79	3368.17	3670.63	4361.35	5620.74	3124.57	3917.54	3536.29	5233.89	4742.83	5583.17	4817.08	3113.66	3945.63	3744.88	3624.94	7712.48	2790.52	4139.98	28255.1	3532.82	2362.48	3279.89	3119.68	4318.5	8627.16	10003.9	3235.83	4192.13	3102.85	4418.86	4219.74	2688.96	4026.32	6104.33	2832.98	9555.45	3356.91	3960.17	12950	13288.8	4477.17
NEG	M130T358	130.051	358.026	26536	26078.6	106148	23536.5	77106.6	53382.8	38955.7	71590.7	67283.2	11345	48927.6	53541.5	41494.6	18497	77308.3	61937.7	51395.3	41291.2	39453.9	42789	39166.4	19873.7	35649.3	54070.6	37931.2	27925.8	33350.9	31493.6	44813.2	30420.7	70766.9	52039.4	16726.4	23172.2	42341.9	37316.6	21826.4	39891	48347.1	30773.8	53250.4	35811.4	49825.3	90008.5	38231.2	18592.6
NEG	M130T327	130.052	327.416	22567.3	31731.3	38726.3	26553.7	28743.5	32257	40725.2	28255.8	26584.1	26800.4	46377.1	31071.7	37636.7	71141.7	25869.6	88476.5	37237.8	23202.2	16394.2	23227.1	20602.7	23004.5	36425.4	35630.8	28701.8	37374.1	30223.8	46285	40422.3	68765.7	18657.5	30080.2	30764.4	27180	37394.1	26279.8	33000.6	190201	33611.6	28390.8	32076.3	27142.8	36924.3	40970.9	53545.5	104075
NEG	M130T195	130.051	195.461	9932.87	3574.45	5181.27	17642	375.059	4550.62	7052.93	5308.06	10684	6946.34	12746.2	7087.92	7710.21	8961.13	4013.2	6226.26	5179.59	4374.96	3660.92	5136.73	11498.6	5339.16	7262.69	9736.58	7919.86	14283.1	2471.51	3052.01	10693.9	3018.77	2587.97	4786.62	8860.64	14389.7	11162.6	5619.17	13757	11162.1	4371.59	7464.39	16641.2	13745.7	16821.1	14751.4	15713.2	11997.5
NEG	M130T220	130.051	219.795	6147.97	1621.78	4544.79	7624.64	3002.21	6059.45	5658.21	5283.97	7032.92	5510.79	4239.01	4227.31	7305.73	4409.1	3069.16	3799.19	2987.35	2192.68	3449.1	2265.11	6059.32	2719.91	4099.8	5809.56	3889.39	3383.93	2214.15	3306.04	5151.47	2003.28	1626.57	3329.09	3479.34	8488.83	7543.34	4582.04	3766.81	6446.46	3387.05	3565.16	4065.8	6027.18	10514.3	9492.63	6882.13	10184.8
NEG	M130T45	130.059	44.873	605652	565220	823303	730072	728001	542375	607424	704645	545242	606493	738347	558529	742365	755899	715461	841643	593000	523292	729053	541300	333847	585562	734905	574989	703966	669124	470656	753553	671822	736348	849056	1.01294e+06	919146	545408	542917	613903	486098	557556	734271	708171	971674	894778	1.32397e+06	683388	694063	561467
NEG	M130T64_3	130.06	63.947	433152	544582	585715	537265	735780	521249	570546	567052	384392	510733	751171	541540	710699	470891	491294	573875	445911	397996	799227	500355	87993.8	431056	588996	663867	687986	567177	429314	959590	668198	593000	156300	478869	448101	420964	492930	622073	328711	527223	275553	540165	653401	416833	521662	256676	478981	457179
NEG	M130T137	130.067	137.265	88215.1	45957.2	118730	62237.4	65054.8	62214.4	57544.3	99396.7	83082.1	48426.1	94842.7	82250.7	114828	201773	60069	135328	50743	102060	79601.4	73230.6	75053	46226.1	81609.3	141547	85336.7	70007.4	52374.4	148366	140407	91821.7	58779.5	73820.7	343575	101599	70249.9	87269.6	82725.4	101868	59842.8	69905.3	63801.3	68803.9	141523	176948	147696	109988
NEG	M130T239	130.067	239.324	3485.75	3256.97	4206.33	4399.85	3690.32	3712.84	3402.69	3976.24	3419.2	4000.77	8364.21	3728.82	48803.5	30652.5	3155.52	4887.96	4903.34	2762.67	3395.89	3237.42	3841.42	2724.29	2949.48	3047.87	3264.84	8094.2	2628.22	3454.63	4581.18	3222.78	4184.43	31053.7	15895.6	3546.25	3392.06	4051.29	2572.33	3941.52	3534.68	3819.4	5242.99	3089.06	15735.6	5147.02	3946.33	4205.42
NEG	M130T102	130.067	102.255	115516	124828	268114	20779.8	17274.1	24117.7	203207	108804	76042	13340.4	137465	58697.3	72554.9	472223	33027.7	24198.4	64496.1	271133	151601	47781.5	19094.4	10353	91483.1	24095.9	110485	14399.1	47088.3	376776	99072.4	188612	26735.9	49943.8	57721.2	194443	35919.8	31364.7	69832.1	163655	99449	88181.2	22110.7	13835.5	206158	21401.8	233907	99992.3
NEG	M130T298	130.07	298.397	318.71	4714.11	204.361	9242.19	10935.5	15992.9	375.329	260.104	286.577	5352.63	14007	12622.1	22356	353.063	13713.5	15215.6	8396.78	8301.45	757.375	12614.9	214.58	4419.43	251.288	11096.3	7903.69	7184.32	9665.67	14197.3	640.182	10319.4	14870.2	10912.4	4651.71	444.621	525.452	13704.9	242.419	8392.41	13594.3	419.362	315.327	270.513	302.862	539.34	279.586	5787.08
NEG	M130T29	130.067	29.353	340075	64162.9	472819	267046	35143.5	196112	344312	195373	271518	221187	123724	144584	223338	172098	12800.8	67116.8	57594.8	40967.7	80829.5	74450	128539	35884.4	96918	251812	139170	183748	2854.8	49562.1	146469	2737.92	3507.41	98872.6	90663.4	343273	273460	47184.7	145338	204321	62058.6	82558.1	278604	267787	389348	462786	533958	288860
NEG	M130T247_2	130.089	247.193	1.77763e+06	1.78935e+06	3.06895e+06	2.49665e+06	2.08597e+06	1.95775e+06	1.60127e+06	1.71466e+06	1.28722e+06	1.69267e+06	1.98505e+06	1.96107e+06	2.65455e+06	1.7306e+06	1.53324e+06	2.80995e+06	1.19149e+06	1.24254e+06	1.91997e+06	1.24368e+06	1.73156e+06	1.16185e+06	1.92234e+06	1.56771e+06	1.94442e+06	1.58098e+06	1.63962e+06	2.10806e+06	2.03543e+06	1.65912e+06	1.90678e+06	1.82745e+06	2.58317e+06	1.47097e+06	1.40958e+06	2.34771e+06	1.52006e+06	1.56279e+06	1.73943e+06	1.77771e+06	2.56576e+06	1.65959e+06	2.38005e+06	2.1756e+06	3.49367e+06	1.5928e+06
NEG	M130T296	130.088	295.775	31634.6	59106.2	100123	41135.9	35540.3	48530.2	39665.1	50934	46158.4	20257.5	48292.4	34017	61283.5	33530.5	48938.8	51590.3	32005.9	35773.2	33915.4	41842.7	34621.2	16986.1	35670.9	34356.2	38269.1	32992.3	40831.1	50060.3	37627.3	34451.3	51144.4	34056.4	20750	22001.7	40548.1	43085.3	23889.6	30365.6	46470.8	33750.5	48033.4	31486.4	53954.2	67850.8	49034.3	22218
NEG	M130T259	130.089	259.361	934428	765710	1.67714e+06	1.26146e+06	1.0903e+06	949083	847829	846719	596300	845966	1.07875e+06	1.0378e+06	1.29468e+06	1.21519e+06	777423	1.46375e+06	701426	670141	908551	655934	975109	519782	876502	711291	1.06758e+06	801386	838477	931073	926144	670947	1.06527e+06	1.01704e+06	1.12718e+06	702768	766252	1.15473e+06	736245	717212	934898	959889	1.21035e+06	679868	1.22279e+06	1.22354e+06	1.17953e+06	753580
NEG	M130T165	130.088	164.516	11534.8	4364.38	17118.2	10292.7	3691.72	7608.33	10532.9	7124.09	7278.41	7703.7	7649.8	8078.78	9630.1	6472.35	4143.11	6606.43	3593.46	3433.04	5781.44	4405.75	7573.51	4644.14	5185.06	10421.8	7215.33	6856.41	2329.91	4705.42	6207.96	3131.01	4558.2	6287.93	5450.84	13085.5	8905.85	5459.28	7481.24	6819.6	4244.91	5251.96	9328.92	9752.14	12179.6	12346.6	14559.2	10164
NEG	M131T371_1	130.686	370.791	458.815	420.724	581.383	424.422	445.805	365.149	354.303	306.672	387.559	293.553	374.093	439.616	306.383	386.229	488.446	362.804	414.797	394.053	266.835	324.581	399.612	328.39	381.179	331.118	501.04	134.724	376.621	347.619	379.866	263.912	250.856	245.651	315.962	306.255	331.088	411.836	238.316	512.804	461.689	312.279	426.459	300.629	513.18	524.787	453.846	327.309
NEG	M131T247_1	130.692	247.06	724.19	743.032	837.544	883.954	457.601	697.608	506.84	581.72	537.379	715.503	636.141	787.936	1047.98	747.705	651.446	709.822	463.202	470.442	680.275	536.114	612.387	484.374	642.97	868.066	647.532	570.389	381.914	772.127	704.694	693.234	497.292	644.134	1025.24	597.198	523.957	880.846	518.32	545.146	589.705	761.982	1020.21	768.774	818.97	729.905	1086.96	760.445
NEG	M131T332	130.939	331.723	1364.41	839.524	977.671	1125.75	1148.49	933.169	1105.73	947.544	956.536	993.784	1180.51	1080.54	1007.08	1196	1071.28	1165.56	1167.49	1134.05	939.709	1171.37	1044.41	1098.86	1089.2	1218.37	1036.19	1205.32	1415.05	1065.92	1330.13	1259.2	1216.22	1113.97	699.696	1092.64	1081.39	1236.47	1168.14	1087.97	1011.54	1103.98	1135.57	1034.47	1167.51	1331.14	1227.48	1022.5
NEG	M131T74	130.981	74.226	1691.46	853.987	7039.65	6067.91	1074.57	1260.38	7507.44	1750.49	8400.28	2327.66	382.723	6215.88	951.119	1671.94	1690.07	255.848	2595.22	909.82	5229.48	5874.94	7623.56	5874.38	1223.8	8342.86	1763.37	1672.78	4648.03	2261.64	3598.4	3852.6	1921.45	5370.84	2771.25	2432.99	4083.38	1116.07	2157.98	1655.4	4963.69	3502.69	3139.48	6913.77	2504.59	12947.4	11112	1498.81
NEG	M131T90	130.981	89.85	2462.31	29782.5	30510.6	26020.7	18242.2	22155	32447.1	1843.87	34456.9	24740.8	28953.2	30532.7	29031.5	3010.33	29405.1	23214.6	3115.47	30137.7	26533.8	29332.1	68049.5	32185.1	2423.97	31304.5	2923.99	3135.04	25485.3	30861.4	29839.5	36022.8	26380.3	782.001	41000.7	31774.9	4697.23	29436.6	3366.91	2892.46	35045.4	25079.5	3948.63	27392.3	3097.7	39224.2	34081.9	37572.2
NEG	M131T441	130.999	440.646	27477	5784.43	16034.3	24280.1	16991.6	22355.5	30666	17252.4	21018.7	17434.9	30089.1	25327.2	25362.1	30258.4	37852.5	31077.1	20297.9	17305.1	21467.1	24019.8	22687.4	15682.9	28339.3	33791	32365.5	21286.5	25828.6	30385.8	30151.4	32555.8	19564.6	21232.7	5259.41	25057.2	27782.3	30331.1	26657.7	26196.5	20491	21557.1	22804	20138.9	26850.6	26700.5	29279.9	27644.6
NEG	M131T477	130.999	477.008	21538.1	22041.9	17733.6	17043.8	19595.5	25918.5	39370.7	19523.2	34008.4	15922.7	21645.8	37319.7	30927.9	28988.5	26754	16346.7	30677.5	31544.7	16020.4	33639.3	38259.1	24130	14849	36513	38743.6	22738.8	11781	20877	21969.6	23307.7	13051.1	33874.7	17361.8	30681.4	25630.3	22127.4	33882.9	29570.7	22834.4	11867.3	32558.6	15497.3	17458.3	20706.4	28371.5	25367.2
NEG	M131T562	130.999	561.676	4720.67	3500.59	4407.47	4313.35	4130.93	11876.7	13277.2	6764.61	10193.3	4342.68	5146.42	5958.5	11400.8	184.564	5773.95	3160.05	1994.96	4999.31	2219.61	4636.31	4718.56	4246.54	3017.88	6489.28	5711.59	4808.75	13050.6	9475.66	553.657	5902.31	10092.6	6621.7	3545.08	1853.33	5411.23	5625.36	11142.2	4689.12	8678.05	3852.41	4627.35	10007	12165.5	11277.9	217.172	4355.09
NEG	M131T522	130.999	522.445	3045.9	1438.41	2036.49	2946.68	2310.78	2665.96	5869.48	2100.4	7946.68	2264.48	6423.21	4532.86	5272.18	3947.93	2850.45	3551.69	2793.8	8915.47	11513.5	2711.62	2374.39	7826.14	2755.4	3339.1	2983.02	4871.84	2787.21	2299.88	2334.18	7634.6	3336.24	2979.51	1556.63	7572.9	3027.46	5165.91	2589.3	2550.21	1939.04	4412.19	2590.18	2577.22	2569.58	2432.71	3688.15	2705.44
NEG	M131T198	131.01	197.936	9171.5	1529.71	11813.8	8541.68	1688.92	5799.86	7098.65	6233.41	18861.4	6783.99	5234.94	4149.11	9209.66	12057	3112.83	3267.75	3073.41	3588.77	2839.75	3780.2	5625.04	3576.71	6231.84	7629.2	5195.94	4396.32	900.856	3654.04	6437.74	1610.66	894.624	2583.54	2414.96	14577.3	13693.7	3608.89	4645.53	7072.93	2750.72	2591.9	13936.4	13026.5	13228.6	11114.7	19478.2	14847
NEG	M131T417	131.024	417.267	1699.59	904.807	1813.97	2042.94	1813.09	1963.77	1914.77	2113.77	2243.34	1489.96	2612.4	1915.7	1664.43	1861.96	2587.2	2230.53	2008.5	1498.72	1662.06	1918.29	1994.83	1608.14	2478.77	2592.56	2759.48	1513.37	2170.62	2652.57	2452.81	2704.83	2203.83	1592.65	738.105	2388.62	2621.47	2342.44	1906.26	2382.43	2014.51	1745.48	2193.31	1539.55	2831.98	2069.36	2304.64	1819.85
NEG	M131T295	131.036	294.508	75630.9	82781.7	88937	53804.1	79655.3	35342.6	95766.4	38982.5	48963.4	35006.9	47649.6	83317.3	53666.1	59180.6	48169.2	44750.2	38406.8	42813.9	74735.6	85580.8	95227.9	35793.4	48192.3	91403.8	91771.7	34566.8	63332.3	98023	75838.5	56755.4	94016	79800.2	55412.8	82324.6	97095.6	100768	44354.8	92848.4	93067.1	77689	54784.4	72402.8	52100.6	52308.8	50386.1	47856.6
NEG	M131T104	131.035	103.736	57880.3	85180.8	98667.4	53684.5	47699.4	49601.4	97295.3	69598.9	74769.5	55496.2	55015.9	149799	69231.9	46430	85665.3	47513	146153	119285	56560.3	60122.2	126843	70016.7	75573.7	68681.2	55784.7	72897.4	52914.9	70387.1	68614	76980.6	74360.3	177375	109593	56366.9	73033.6	66766	60151.8	83731.5	158852	47878.6	101035	62667.9	65408.5	99227.7	63059	68250
NEG	M131T117	131.036	116.601	470265	472475	621404	266184	220658	424965	440924	178885	552394	408530	259050	615752	415876	137897	523231	101887	492505	394237	149529	459532	160491	217197	544431	505577	492187	407008	239867	404052	356651	440275	523643	679629	615490	504246	497000	467173	513605	147718	528198	103587	523310	445700	316771	557694	531057	521796
NEG	M131T206	131.036	205.881	8209.9	6321.29	10721.5	22262.8	8681.66	7752.7	9779.7	12708.9	9877.2	8664.22	24192.6	9372.48	12851.3	10811.1	13175.7	10153.4	10247.3	7565.69	8973.05	11136.4	13902.5	9108.77	8601.42	10364.5	9498.77	11839.2	12984.2	11816.1	10026	7986.74	9450.24	8352.62	7350.38	9545.6	10366.5	11077.5	10183.4	10838.3	11383.5	7585.89	12064.6	8805.07	9219.43	15092.9	8948.07	10037.6
NEG	M131T138	131.036	138.281	122134	105209	81431.8	130228	115700	121601	116345	131898	153922	117540	136267	188621	140500	138000	130861	95815.4	145172	153133	111763	132393	40463.5	56229.7	148838	142324	128478	125476	129259	124439	136656	152674	179471	159990	174845	154563	170542	124568	122074	51025.3	140968	133458	69589.8	155831	146174	166196	138053	139494
NEG	M131T25	131.045	25.385	5236.93	3196.79	30356	16405.2	10173.3	14993.8	23262.5	5808.63	20813.9	29442.1	9361.52	8083.24	12976.5	16511.2	5847.23	3774.85	9794.71	16125.4	14238.6	4111.09	1764.71	4230.58	5795.86	28189.4	14909.2	9315.21	3859.84	24353.4	30746.3	14707.5	8229.59	6021.71	1735.2	34116.3	15950.2	6428.76	2868.16	24736.9	13734	12686.4	16563.2	17176.8	43101.8	25916.9	26269.6	11950.8
NEG	M131T359	131.047	358.773	49223.8	54629.3	44947.1	54032.6	51253.2	35117.2	45123.4	42954.8	47275	39905.5	51830.1	53221	47526.5	54825.4	47866.5	61209.4	40842.1	40761.5	39767.5	42697.7	44517.5	44054.1	45470.5	42152	64796.2	34356.5	44362.3	38789.6	60569.9	42272.5	50297.3	48069.6	59322.6	41055.6	54397.6	53064.1	43095.3	53342.7	49333.2	43167.1	54737.9	43676.1	50838.1	56507.5	50330.7	44137.2
NEG	M131T328	131.055	327.614	993.223	1710.53	1980.3	1623.85	1612.27	1762.75	2895.1	1061.24	1619.18	1494.33	2191.76	2246.86	1520.24	4926.01	1594.08	6066.45	2054.84	1053.42	1021.9	1081.03	974.47	1386.19	1759.81	2041.51	1456.15	1864.74	1696.68	2939.23	2593.53	4318.03	1102.64	1504.75	3574.28	1456.33	1572.67	1787.24	1835.86	11487	1640.86	1297.62	2159.63	1791.39	2680.93	1818.81	2964.19	6788.11
NEG	M131T246	131.055	245.868	770.411	954.458	787.036	1528.58	1092.4	1760.2	1248.3	1026.46	82721.1	1467.28	1256.27	1358.86	1152.88	2088.41	1599.91	1373.74	893.235	794.401	779.704	1214.5	796.61	928.784	1379.49	97536.7	1307.46	828.328	1299.13	136242	139761	1406.02	1154.92	1145.5	1172.01	1316.96	1613.22	942.789	1041.44	1263.98	1116.35	1028.71	1617.42	1128.04	1821.89	1810.9	161874	1470.44
NEG	M131T64	131.061	63.981	42238.3	51387.2	56870.6	53133.2	71494.8	50712.2	55855.8	55793.5	41264.3	54200.8	72916.8	50583.6	71758.6	45733.1	48284.4	54620.8	44710	41284.4	79370.8	45360.1	8686.59	43190.6	54449.3	65038	66636.7	56302.3	46591.2	94391.1	63926.4	61533.8	16529.7	48107.2	46055.9	43220.3	46859.3	61053.6	29777.3	55212.8	26697.5	51498.6	67450.7	39946.2	58795.2	24309.5	51901.9	43028.1
NEG	M131T45	131.061	44.8815	62884.5	62756.9	101866	74880.3	90806.1	70655.7	65137.2	80439.4	59645	53462.3	84319.5	62645.9	72890.5	79793.8	87259.6	93315.1	57051.5	63144	76818.4	52449.3	22909.2	53651.5	71599.9	136335	70947.5	81564.4	42922.3	80104	81279.2	73732.6	89377	120846	107862	61429.7	81529.1	73202.8	42881.7	62373	87195.1	78094.4	114548	105263	152440	86172	147160	61028.3
NEG	M131T123	131.072	122.629	300039	178240	570139	274120	340915	233127	309514	178345	273894	355287	264531	315755	307365	345182	312726	1.36773e+06	154690	276259	256185	195697	207383	141825	250794	364803	285785	155856	207777	445809	249165	221377	272821	312527	127631	238283	298756	635554	188143	337593	343395	121150	417623	157137	367879	246261	280449	251702
NEG	M131T29	131.069	29.2685	42223.6	8905.15	49397.1	29410.9	2359.57	22939.7	42919.8	25868.1	28964.8	25921.1	13104.9	14839.8	29262.9	20809.6	1891.51	7382.06	5553.07	4584.79	8744.74	10460.4	15051.4	5774.71	14329.5	31922.4	16995.4	912.692	455.144	4730.21	15549.3	0	2045.67	11697.4	10057.9	39134.8	33840.8	6286.65	14530.3	22058.9	9342.99	9307.51	29048.9	30983.5	1956.95	51674	66147.6	33109.4
NEG	M131T371_2	131.084	371.186	120941	147307	149080	133870	153203	136657	133099	117849	114342	82528.9	138483	126895	122160	152945	126420	145193	103765	106528	89581	113277	125841	112916	123496	100691	143240	87333	137151	110463	161348	117001	104799	116955	127605	105823	131496	127062	94046.9	165538	121174	115168	150351	102778	142340	152436	148291	116516
NEG	M131T497	131.083	497.233	59319.2	77902.2	51009.8	62194.7	70801.2	48052.7	53223.8	71533.9	57650.6	41403.5	73176.8	74718	89553.9	93456.8	82775.7	94805.4	56411.7	51485.9	47270.6	53675.5	44388.7	48705.4	70994.2	59387.8	75400.5	45565.9	63239.4	62005.7	75250.9	61485.2	40941	60689.1	91649.5	52466.5	78926.5	88636.8	57192	76358.5	61992.9	46550.7	80935.5	56663.2	82889.5	59862.9	58519.7	79337.6
NEG	M131T247_2	131.092	247.189	112026	113405	192445	229338	118893	116473	108638	103632	81134.4	104789	130652	115956	153129	112884	97340.9	180279	71442.7	73673	110591	82041.3	109511	70522.2	115132	93616.3	125512	98505.6	97035.8	127885	131876	107779	116518	105936	161044	89077.1	96552	154406	87696.1	102298	113683	98078.9	155579	101264	155617	142084	151166	104844
NEG	M131T259	131.091	259.425	48019.6	42799.7	100747	75171.5	58954.1	53871.9	52941.6	51139.8	38288.5	49741.4	64837.4	58419.1	71924.6	70821.7	45047.5	82074.3	42768.4	39688.8	51761.3	40050.5	57045.8	32647.7	48895.2	41327.3	63093.3	45455.2	47327.2	56867.9	54038.8	40524.1	64599.8	57379.3	68633.9	41880.2	46965	68783.7	42243.8	41954.4	55155.8	52188.9	70991.3	40236.5	71602.9	72783.8	69634.4	46287
NEG	M132T289	131.631	289.443	885.227	270.91	512.899	459.948	144.206	296.379	529.098	339.181	486.917	401.074	437.353	378.196	452.261	464.258	239.47	350.305	137.794	267.183	246.294	485.433	364.227	342.596	308.676	554.165	502.952	347.705	131.628	241.125	317.655	101.218	100.276	282.7	320.766	722.776	580.773	256.871	257.153	392.782	239.632	284.572	341.482	386.506	488.613	512.653	606.469	529.951
NEG	M132T611	131.916	610.833	18560.8	15983.5	16826	18865.4	16141.7	23088.7	18840.6	19253.9	24795.2	17323.9	18624	17743.5	15948.5	15495.2	15337.6	15576.4	15913.6	18079.6	15444.7	15115.7	17723.3	20036.2	16294.1	18727.1	18373.4	18864.1	14541.6	18352.7	15409	16243.1	23423.3	16062.2	17240	17415.3	18355.1	14463.8	19797.4	15608.7	16445.3	18264.8	17103.4	26971.4	16887.2	12580.2	15382.6	689.693
NEG	M132T29	131.984	29.229	2865.35	976.756	328.612	1373.73	55.7962	856.857	1114.08	1042.67	2733.57	896.075	1024.7	1382.59	4188.34	1889.68	0	581.385	318.282	0	305.713	605.793	1263.92	552.457	96.625	3021.16	575.318	537.794	0	513.226	1047.02	302.325	0	798.915	540.951	4092.75	4352.06	536.869	321.004	1239.73	779.677	470.37	1933.59	1927.33	1216.8	3282.12	3985.62	1763.9
NEG	M132T216	132.013	216.335	3148.31	4904.68	6662.32	7126.91	5160.32	10346.5	4428.34	4305.09	2880.25	3953.75	4731.42	6850.63	6400.59	9722.11	8616.65	6126.11	3674.65	3695.12	3892.33	5371.87	5627.29	5044.88	5448.75	6827.78	7909.86	4472.9	5893.91	4924.79	8768.6	4166.58	4021.01	4326.25	7264.45	4186.34	8382.22	6584.09	3454.6	5318.4	6029.23	6818.04	4646.07	6527.25	5534.2	6592.38	4222.07	7574.78
NEG	M132T22	132.028	21.728	11279.3	2042.61	7890.49	8834.27	438.51	5318.31	6398.34	699.237	16094.3	6609.13	4127.61	3942.88	6070.73	8369.94	706.369	2766.02	2370.88	3414.98	728.678	2545.1	4541.59	155.621	4859.31	10310.7	3595	5124.8	37.3089	1050.84	2909.7	149.949	113.255	1650.22	3106.25	16373.1	22184.7	3953.24	4601.59	7587.62	2083.41	2170.41	10526.6	10003.7	9239.68	14065.3	13554.5	10200
NEG	M132T290	132.031	289.6	238208	92151	159979	159928	58703.2	123311	201344	112279	218456	127630	118129	141692	126657	157589	64565	112443	85519.5	74241.4	86150.8	134914	114239	98557.6	122715	164532	141652	112291	43263.3	97131.2	106917	43053	28055.3	107473	81094.2	250326	199250	112710	126754	185330	104428	91755.2	144736	153985	173927	213100	215023	262383
NEG	M132T382	132.031	382.179	99713.8	57389.6	102811	75612.7	66572	67475.9	86687.1	64874.8	113561	57840	42541	72683	40424.5	96063.6	60839.6	95941.3	44225.9	52743.2	35125.7	47435.1	50007.5	43088.3	52178.8	36027.1	44127.3	27591.2	37193.7	45682.3	44142.1	61196.1	41453.9	56181.1	72693.6	71178.7	86237.6	115753	66053.4	60417.1	59520.4	35101.3	53508.4	58221.8	73741.6	39179.7	79080.4	57201.2
NEG	M132T445	132.031	445.42	34420.3	8752.87	26510.5	25841.8	21828.6	20939.7	23323.2	18672	23092.7	22500.4	7537.31	25800.1	7535.19	18909.2	12643.8	20906.9	16803.9	15425.1	10829.6	10163.7	8943.76	9930.84	12958.3	8192.07	11947	7857.89	10523.7	9573.49	14617.6	12522.6	7394.79	24458.8	8835.7	19975.3	21344.5	25022.6	20578.4	9436.72	18780.5	12115.7	7654.33	18456	25723.5	6763.98	24974.6	16091.9
NEG	M132T26	132.054	26.252	71196.7	37948.9	110409	47857.3	45486	58460.6	113930	34050.2	58608.3	111454	46009.9	23382.1	19199.7	89640.3	18638	10968.4	61290.2	56307.5	36196.5	12699.3	28756.1	33442.7	39228.8	78166.5	52377.2	21049.1	17270.1	101323	95923.5	82482.8	37661.2	25781.1	19757.3	70313	14412.9	14810.5	46676.2	62592.2	47031.9	52829.4	43648.6	54058.9	123180	77030.8	74170.3	39321
NEG	M132T359	132.05	359.365	1823.86	2078.68	1258.06	2700.46	1719.97	1385.52	1774.57	947.43	1637.3	1683.31	2248.78	2561.89	1908.21	2313.2	1460.23	2361.11	1902	1952.99	1252.42	1855.84	1270.84	1865.48	1633.13	1560.2	2873.67	566.434	1726.98	1344.83	2163.63	1899.58	2522.54	1652.3	2358.88	1817.55	2405.02	2206.96	2095.47	2102.03	2123.67	2184.07	1922.34	1727.31	2435.13	2550.8	2358.96	2176.45
NEG	M132T296	132.067	295.747	3327.06	3697.5	6974.18	5924.37	4167.27	4290.67	4992.1	3452.36	4880.07	2825.38	4262.25	3921.39	2249.67	3584.27	4302.91	3062.86	2847.64	3654.01	1893.52	6065.2	3802.53	1985.15	4411.51	6074.26	2625.37	2614.79	2399.62	6009.67	2981.62	5494.57	5931.53	11097.9	2468.66	2752.83	4011.14	4550.25	2685.04	6588.53	2323.66	3872.88	3011.74	3442.31	4459.65	5262.65	5529.01	3757.62
NEG	M132T343	132.067	343.223	2462.99	1451.05	1582.47	1895.59	1544.17	1496.36	1490.06	1517.68	2013.7	1417.95	1857.87	1904.88	1666.22	1858.21	2609.1	1997.83	1764.56	1663.47	1445.27	1994.88	1648.01	1699.38	2158.62	1633.66	2354.62	1284.96	1923.26	1309.64	2651.78	2213.32	1247.28	1791.06	2256.31	1913.05	2643	1804.09	1850.11	2398.02	1931.87	1534.22	2423.59	1240.88	2143.18	2777.56	2199.53	1799.04
NEG	M132T324	132.066	323.974	3230.43	4468.34	2692.32	2919.46	3845.97	2747.95	2715.09	5581.67	3928.52	2986.71	4297.87	2535.75	3985.45	3788.69	4422.22	3554.5	2676.1	3078.6	3740.38	2454.21	3845.14	2809.47	3751.73	2674.37	4851.3	2276.38	2704.82	4788.25	2876.92	3276.28	2890.09	3024.64	6527.87	2580.75	4186.99	3234.45	2268.4	3313.41	3141.26	2275.81	4177.51	3782.22	3020.69	3368.63	2977.74	3562.41
NEG	M132T64	132.064	64.028	2005.11	2125.18	2527.99	3658.24	3688.48	2487.46	2796.12	2797.69	1499.68	2183.89	2836.06	2484.09	3342.93	1956.99	2616.43	2402.07	1992.71	1834.86	3623.78	2193.24	447.746	1741.29	3748.82	2165.48	3180.83	2008.15	1784.31	3916.09	2602.98	2118.35	2833.08	1922.24	2012.03	1374.66	2184.64	2122.33	874.273	2303.72	1295.98	3171.83	3761.18	1727.13	1124.25	12921.7	2643.05	1924.27
NEG	M132T110	132.082	110.238	106697	27453.6	69011.8	72136.8	26269	40724.9	61352.5	38995.2	67885.4	180671	80086.8	96394.6	61725.1	55576.2	20100	79036.1	19774.2	20114.7	36995.7	31495.6	18365.4	29974.1	45722.2	118426	47385.1	62503	9553.01	42157.7	71935.3	16583.4	19967.9	64960.3	51401.8	113242	159242	47896.6	47490.8	86895.3	28022.4	44827.1	104549	157907	86641.7	105247	86638.7	97443.5
NEG	M132T92	132.082	91.9345	36184.9	24445.9	47189	45621.1	7164.66	20427.9	44755.9	24455.8	49003.1	65010	46641.8	40918.1	81447	39632.7	9364.91	30926.9	15599.1	11195.7	32600.6	21662.8	34973.9	30785.3	41103.4	68515.9	31429.4	44376	3356.32	29884.3	49380.1	4880.82	1653.33	23626.8	55687.4	81153.2	57496.9	21842.7	37317.1	34156.7	32121.1	39594.9	90778.8	53821.4	57696.2	126543	64884.1	75906.3
NEG	M132T371	132.086	371.213	6700.11	8940.58	8261.66	8542.51	9504.6	7934.57	8015.4	6630.1	6015.57	5253.62	7632.48	7942.71	7998.74	9181.98	6712.8	8814.06	7662.15	7209.6	5098.32	7833.19	7549.21	7028.59	7413.12	6469.38	8850.62	5224.95	7809.4	7137.07	9106.69	7102.64	6764.11	6434.1	7943.69	6730.35	8025.28	6904.56	5731.53	10521.7	6868.14	6549.72	8298.81	6292.7	8085	9888.35	8998.75	7467.51
NEG	M132T497	132.086	497.145	3637.9	4329.22	2515.25	3477.58	3657.26	4250.15	2552.14	3650.01	3238.21	2455.22	4250.28	4503.79	4977.88	4740.31	4828.88	4791.79	3529.61	3027.39	2522.23	3084.76	2240.44	2314.9	3853.82	3480.79	4524.43	2021.02	3284.77	3626.3	4302.15	3405.48	2120.48	3271.22	4847.79	2930.83	4123.29	5069.85	2853.32	4154.38	3662.39	2472.8	4277.5	3371.18	4375.53	3645.6	2692.63	4366.45
NEG	M132T247	132.093	247.427	8937.27	8782.22	14930.2	12180.2	13733.7	9556.18	8251.33	8504.03	6407	7969.96	10172.9	9890.9	18142	8586.53	7869.48	14603.5	6246.81	6092.74	9312.72	6349.61	8738.28	5690.06	9947.9	7427.25	9586.27	7695.87	7144.84	10444.1	11044.8	8453.12	14907.5	8697.24	14372.1	6951.1	7327.67	11862.7	7124.53	8635.44	9282.42	7380.63	12427.5	8074.04	12244.7	10784.3	11924.7	8347
NEG	M133T32	132.869	31.834	1283.05	38737.5	5475.02	9846.78	17691.1	4902.16	4764.17	5705.49	1492.37	4889.56	6393.48	4223.32	4972.23	6763.51	7494.44	4516.65	5198.97	8863.24	5444.39	6048.09	4203.03	5486.32	7937.31	6764	5778.81	4531.78	5181.84	7283.99	6794.3	6361.82	8221.69	3485.89	7390.34	1344.58	7978.54	8354.55	5960.83	5799.53	6112.92	5664.33	5138.79	5910.68	8034.61	1558.44	4476.69	785.839
NEG	M133T202	132.901	201.663	78072	77386	74358.1	80686.2	76041.1	72333.6	73307.3	75969.4	75997.9	76211.4	74393	45249.3	45688.5	72284.4	73266.9	75848.6	69205.1	67803.6	59314.6	80412.5	18154	26692.9	37228.7	75347.1	71810.1	76008.2	68590	80796.2	72129	74623.3	78147	69277.3	59388.8	77280.4	77452.5	77374.3	77598.4	90426.4	74199	78836.7	71746.5	45249.4	76760.6	77972.5	76703.7	78183.4
NEG	M133T680	132.924	680.303	12105.5	8697.77	19191.5	17049.3	19317.1	12040.1	13745	13053.3	19247.9	13589.1	9883.81	11249	3531.27	18786.4	12819.4	10018.2	8062.2	18739.5	10520.3	19393.1	12095.3	9072.68	14885.5	16174.5	9100.95	7838.84	19285	11398.1	9427.1	8709.94	22870	9833.61	12690.4	12342.3	8801.97	10797.5	29842.9	6303.04	13697.5	14071.8	11092.9	10473.2	1774.13	27308.7	15621.1	19630.8
NEG	M133T708	132.924	708.368	5378.11	21182	19919.4	16491.8	14491.3	14440.6	25446	17710.5	20866.9	27637.8	9174.82	18389.4	12870.3	16952.1	18129.8	14137.9	26720.7	20212	16465.1	18694.4	14495.1	18756.8	43618.1	18081.4	17535.7	7577.36	18051.1	21455	17302.5	28115.7	45121.3	22165.8	50807.3	18513.9	25319.7	20019.9	1935.37	2342.12	13509	14109.2	33245.4	16965.5	18077.6	21596.6	45774.3	29700
NEG	M133T650	132.924	650.068	18681.3	13274.9	6081.8	2556.87	1764.48	12352	31041	16411.2	21323.8	16405.7	17624.7	27952.3	18440.3	15459.7	21261.6	17450.5	32093.4	9814.33	12783.8	26740.5	17346.4	12645	18414.1	48310	15783.1	18629.9	12713.8	15930.4	23370.8	33480.9	26538.9	12054.2	23086.6	16937.6	15514.7	41355.7	3013.25	4293.97	18509	20628.8	29998.1	9379.31	14556.3	20979.7	16698.3	62099.6
NEG	M133T621	132.924	621.403	34948.3	8968.57	37172.9	10890.8	1392.24	889.151	10663.8	13153.9	1116.01	9792.9	8726.33	1047.47	953.7	2632.34	1740.53	14532.3	908.65	1003.88	1982.68	10233.4	1118.85	1049.71	10083.3	12971.7	49723.3	1674.09	20021.2	1127.25	1457.58	1339.73	32982.1	1103.24	19982.8	5371.69	3992.53	31269.5	1018.63	1126.6	5156.51	2160.74	14947.6	986.357	5484.89	24604.8	41050.8	38693.6
NEG	M133T22	132.931	22.2375	4119.64	3880.13	5203.92	2136.23	4038.94	3556.58	4238.77	6509.6	5375.71	2963.01	4987.92	4271.89	4652.72	6051.76	7668.59	6917.9	2899.22	23481.6	16378.8	4325.02	4685.46	4904.32	6996.18	3195.24	4530.76	4498.34	4156.3	43539	5364.92	5453.89	6712.56	15209.2	7079.85	4568.54	6589.65	9808.66	2521.54	4187.15	5815.09	4831.44	4082.53	4964.44	4548.45	5670.01	3012.66	4272.74
NEG	M133T332	132.947	332.108	2827.83	1242.75	2433.94	2592.62	2729.7	2368.37	2486.62	2456.53	1971.78	2709.08	2345.47	2994.01	2738.51	2134.38	2012.02	2389.81	2757.81	1863.51	2645.79	2302.51	1397.43	1932.57	2571.65	2307.64	2267.56	2424.61	2743.69	3188.81	2938.87	2962.55	2444.41	3230.5	2175.78	2915.89	1839.83	3349.55	3363.56	2246.9	2736.42	3567.05	2552.87	1875.98	2830.41	2730.13	1668.48	3031.23
NEG	M133T422	132.982	422.421	2600.92	3644.08	2522.71	2329.76	1717.7	2530.26	3125.25	1946.03	5598.36	6056.59	2331.69	1921.13	1899.21	2037.31	2662.89	1691.8	1669.72	2547.13	7378.17	2805.91	3247.09	2831.96	1577.9	1626.99	1631.7	2145.02	1624.49	1367.48	2585.62	1607.96	2124.25	1185.24	4095.55	2181.99	2638.99	1606.18	1354.08	2665.94	1851.23	1900.58	2702.04	2074.59	2581.47	2233.01	3314.88	2740.83
NEG	M133T278	132.997	278.187	7570.29	6428.69	3866.22	2059.43	7901.55	7300.99	5615.09	6221.66	5483.69	2380.87	8630.13	3349.4	3535.24	2831.81	6496.05	4193.24	2089.52	1436.84	2863.88	4673.59	9876.79	10371.8	4576.99	4775.63	2064.42	2047.48	1577.15	2790.85	3451	3928.22	9746.61	2772.16	15979.4	3354.24	4059.13	5911.58	3837.65	10354.3	7983.58	2414.98	4779.43	13168.4	4276.56	11157.9	2671.33	3016.51
NEG	M133T112	132.997	112.134	3322.07	3064.85	3572.86	4122.74	3529.74	2851.58	3112.35	4064.03	2441.83	3079.91	4205.69	1717.52	1983.76	2942.44	3100.74	3097.28	3730.26	1114.31	3604.13	4386.82	2998.39	4443.59	4627.33	3958.36	2299.9	2878.46	7673.25	5348.6	2371.59	3847.34	4095.59	1662.1	7593.48	2102.8	3767.33	4681.82	3783.17	3656.9	4622.28	1296.82	2997.61	3863.41	2664.9	4054.23	2163.66	1806.5
NEG	M133T385	133.015	385.156	106725	46309.1	105741	138397	132166	105122	136181	78407.6	118822	78909.7	126791	128598	147740	203589	181074	181426	108332	116136	114930	119914	169476	88326.5	157487	195590	156034	93184.4	122109	160339	145309	161637	105617	113901	53576.5	115123	155477	194115	120982	158961	124461	115690	114939	110655	154028	135180	149651	98218.2
NEG	M133T412	133.015	411.889	30010.6	20433.6	51752	38032.8	39914.6	28396.1	35211.7	24466.8	34373	32174.9	37264.7	39206.5	39164.4	49954.6	66896.6	43157.6	60596.4	37541.3	39740.8	61343.8	52217.4	28401.8	41017.9	48724.9	43469.6	36238	37986.5	73766.6	38452.3	39465.2	35483.9	62490.9	16811	33258	38691.2	75171.3	35667.6	42158.8	33079.8	40049.9	36801.7	35575.1	35836.3	38987.2	36488	34318.7
NEG	M133T437	133.015	437.189	7628.51	9684.57	11301.8	18638.6	11948.7	7267.42	8502.75	7188.5	8657.13	10819.3	9211.8	9188.84	9477.77	10604.4	10739.9	10904.2	10791.3	9968.31	21851.7	9764.13	19059.7	21865	10238.5	10901	10116	11565.3	8188.48	12331.1	9507.1	7826	10045.8	9319.95	9905.84	10992.3	9007.15	8980.77	8083.12	9376.59	9346.05	17731.1	9318.93	9806.23	7264.07	7425.04	9644.23	8686.33
NEG	M133T290_1	133.015	289.594	18239.5	10922.6	15957.9	13932.5	26739.6	14230.7	18921.7	16889.6	33004.1	14045.7	19411.9	17302.9	27443.4	16614.6	21503.6	13951.2	11948.9	17136.4	4045.37	10126.3	13937.9	9143.91	18553.7	10228.1	20855.5	12765.2	7460.39	15194.9	15032.2	17260	7483.66	14137.4	17322.2	17060.6	18990.3	23486.5	13726.2	19328	14509.4	23755.1	17877	19724.2	14714.4	20048.2	15751	18496.9
NEG	M133T290_2	133.034	289.594	11044.4	3953.71	7232.84	8382.93	2582.3	5627.33	10133.9	5335.38	9125.45	6912.91	5759.49	6211.71	5357.27	8039.05	2925.86	4799.32	3754.98	5813.58	3878.22	5828.55	4802.16	4513.11	6118.07	7273.99	6923.8	4563.73	1805.64	4101.55	5254.91	10280	7629.59	4759.32	4213.63	10426.6	8011.18	4959.84	5828.11	9410.8	4841.46	4538.59	6854.58	7392.35	7828.32	9873.17	10481.8	11852.8
NEG	M133T381	133.034	380.547	2187.7	3841.91	6114.22	8545.88	6358.28	7409.62	621.581	4598.05	12276.9	6288.7	11769.5	10215.2	10223.4	724.327	12830.9	13043.6	12264.5	6194.59	7001.35	306.142	13826	902.683	8318.42	11142.1	249.245	380.165	4362.72	303.552	5620.02	15324.6	8231.41	11535.4	793.868	4565.39	13239.7	939.745	852.549	13380.7	515.139	256.117	8210.68	7091.32	11143.8	9288.5	7219.2	8336.7
NEG	M133T221	133.051	220.603	6236.55	3751.62	6508.29	4896.88	3772.71	9868.34	6347.57	5405.05	5087.37	4287.53	5906.82	11715.7	8192.37	10985.4	5802.1	15844.6	3351.49	7839.96	2775.62	13292.4	6416.05	3560.19	2700.44	7229.35	4897.37	4321.21	4127.12	4181.68	5644.33	3768.56	5023.14	10700.6	6142.89	7927	4956.82	6632.9	5966.93	27388.1	4199.36	3108.38	6725.64	5053.1	5439	9278.99	6949.53	5280.48
NEG	M133T49	133.051	49.016	1648.37	833.115	870.009	1616.46	1336.91	1845.74	1406.4	1504.42	1435.36	3161.88	1336.99	2033.11	1328.51	1119.19	846.04	295.41	1680.28	1413.91	2323.1	1337.94	685.735	1356.14	1053.75	1863.66	2056.57	1057.1	1901.98	2096.56	2066.46	1693.55	992.526	1410.09	510.896	2573.41	2105.94	1917.35	1872.85	2444.94	117.067	1831.43	757.103	1763.74	1807.55	484.108	2386.89	2026.72
NEG	M133T267	133.051	267.117	4255.76	1912.94	3093.64	3855.47	4493.03	6083.77	3769.41	4135.98	3727.74	2306.5	3762.76	3824.56	5276.58	6852.91	3547.22	3819.1	20391.2	5089.16	2937.02	2798.13	4736.04	3101.21	3592.42	5444.4	3522.93	3154.8	2543.85	6152.72	4338.25	4466.7	4201.01	3637.11	4563.93	3874.69	5870.55	4830.79	23880.5	4985.25	26983.1	3051.65	3144.7	4615.47	3223.93	4427.33	3269.04	53079.6
NEG	M133T26	133.058	26.18	4622.61	3072.17	10920.3	11016.3	3517.37	12392.5	7098.54	4233.68	7079.07	9951.81	4678.54	9735.79	8531.06	5206.12	3207.17	2275.43	3185.24	14975.4	977.797	4951.14	3012.96	79384.9	17168.9	5617.88	5581.15	22235.3	12831.9	4246.73	11947.5	5730.14	10469.6	10234.4	4655.4	6679.83	8387.15	8280.33	10866	5054.7	2970.63	3787.31	10547.2	5205.23	12174.7	7951.82	15734.6	6205.97
NEG	M133T102	133.066	102.365	7259.71	3999.2	8243.99	5304.45	2743.78	8358.34	8861.68	4861.8	9698.24	9601.46	9027.36	6925.12	30769.8	24882.5	11486.7	5449.48	14857.7	13519.4	5526.25	8923.24	5060.41	4349.54	13247.6	15542.9	5993.95	20661.7	19603.7	6454.64	10606.3	6553.64	4719.75	7984.92	15975.8	12687.2	10318	5786.56	23484.2	29677.1	5203.93	16823.9	9778.96	10051.5	30029.7	12296.3	9138.96	38520.1
NEG	M133T23	133.074	22.9795	47070.7	31351.1	98244	108769	43416.3	238677	61470.3	79089.5	269854	70528.9	73353.9	346721	240705	79526	132357	234312	42715.8	491316	53067.4	237688	71355.7	127041	407856	90171.3	96579.9	10789.1	838256	239688	67088.5	139059	89795.1	390061	89172.3	79259.7	114129	240062	61845.1	324313	37801.4	166751	103853	49707.1	339929	142117	115149	137153
NEG	M133T371	133.087	370.974	388.274	764.236	740.562	779.42	609.382	503.385	643.986	705.649	341.861	286.669	698.046	415.693	418.55	774.908	406.107	538.938	410.229	368.772	365.255	471.402	692.737	541.672	506.806	326.413	601.329	276.765	770.069	331.978	676.391	548.396	494.479	444.695	575.889	362.279	611.374	569.353	320.793	705.496	577.929	357.421	373.494	308.428	590.475	687.132	642.735	458.597
NEG	M134T42	133.992	42.418	33220.8	23545.9	22843.7	103047	33789	39888.5	31260.4	16179.2	51742	48157.1	132299	94187.8	46605.1	70279.2	38744.3	31557.5	17554.4	32090	11992.8	67462.7	6425.6	26273.2	85046.7	113518	59469.2	26489.4	29261.1	59494.7	89319.9	41233.2	27028.9	39390.8	47785.6	32261.4	116548	14777.3	32862.9	21695.6	91831.5	75194.3	32175.5	61116.6	14551.6	31999.1	31683.1	30178.4
NEG	M134T89	134.008	88.817	8172.83	7829.05	12710.6	12507.4	4070.76	8502.55	1064.91	6923.17	12380.9	5511.03	15793.5	7941.48	9774.1	10195.4	11167.8	10384.4	2120.45	10274.2	9106.09	8895.04	8578.6	8706.19	11011.1	8548.25	7355.54	9988.97	912.72	945.107	9783.33	14055.4	16222.4	7606.71	16078	8939.94	9644.27	11197.6	10019.7	10522.8	13145.9	9176.11	9932.55	7758.64	8811.92	9934.72	9674.18	9912.55
NEG	M134T385	134.018	385.16	5262.52	2355.67	5057.76	6250.2	6731.5	4983.85	6664.09	3883.1	5588.89	4018.09	6299.59	6278.03	7203.7	10102.4	8914.13	8907.86	4882.53	5906.3	5913.41	6088.81	8329.42	4115.83	7157.56	9803.94	7671.34	4050.19	6094.15	8358.92	7752.49	8226.3	5498.75	5187.02	2604.25	5467.84	7850.82	8989.08	5917.62	7825.68	6012.2	5725.78	6054.94	5829.34	7812.09	6660.62	7292.27	4971.58
NEG	M134T286	134.029	286.454	9964.87	7810.93	1343.88	2563.67	12206.3	5629.84	4506.89	6397.32	3777.13	6130.52	7281.74	4100.28	3076.37	1062.73	6277.25	4757.95	4850.45	1783.54	7283.46	7666.9	8722.7	16549.3	4835.83	2798.68	4556.58	3153.63	4736.25	5163.9	3443.36	4823.76	13233.7	1953.51	19150.1	4333.32	5266.81	9278.64	5866.05	8843.87	11299.8	4166.7	4958.32	11899.9	8166.4	1417.54	1683.91	6101.79
NEG	M134T191	134.038	190.537	1906.65	1865.49	995.858	1518.88	2062.44	1925.06	1109.55	748.207	1954.32	843.77	826.522	1068.77	5861.24	1814.47	588.905	1203.43	664.758	579.211	720.367	977.773	1347.04	2070.29	2149.79	1912.16	1119.1	1158.85	636.377	2125.27	1893.43	1298.53	1122.29	1034.75	1397.96	892.016	1717.47	1359.99	1524.32	1119.79	638.32	1218.24	1785.24	1500.68	1476.54	1454.48	2068.93	933.645
NEG	M134T152	134.048	152.05	10509.2	11437.6	18433.2	13580.9	16695.1	11444.5	21030.6	29726.9	34699.3	12958.8	18120.4	11993.3	13873	13910.2	24655.6	14705.8	17504.9	13211.1	11771.2	14544.9	8347.23	10706.2	28912.5	16760.6	13125.8	23894.4	13307.5	51625.3	17165	29198.9	20046.7	10501	13134	25932.3	28682.1	16176.2	14815.4	15109.1	11929.6	12793.7	24448.5	20458.1	19540.8	12458	11853.9	13095.9
NEG	M134T17	134.047	16.658	5439.45	5246.73	1831.31	2014.77	3407.29	10310.1	5968.07	8556.1	5045.66	12085.8	16054.6	4438.91	5714.33	4608.83	2503.52	6041.66	6607.24	4786.85	4302.19	3896.27	901.38	2874.04	6037.32	6170.58	2693.22	2410.75	3389.09	4150.81	3971.68	5588.25	12060.6	7659.93	13447.7	8793.61	3564.2	9173.6	4355.83	5311.7	6169.35	4469.03	3015.93	3163.46	3821.1	4287.46	8389.75	3520.76
NEG	M134T102	134.048	102.481	20761.4	11836.8	13733.3	23015	9989.52	8299.37	10205.1	9146.96	11117.3	26810.9	11332.6	7710.66	10553.1	8578.03	28052.7	10008.8	18430.1	11470.2	8445.32	9459.85	7660.01	8123.49	9989.4	11382.7	7740.38	11341.1	8292.04	11429.7	10448.5	14587	13711	6502.87	16684.5	11002.2	9294.67	11152.5	10103.1	11330.8	12410.1	9167.6	9465.94	7140.06	10023.2	11008.4	18343.6	9612.8
NEG	M134T188	134.062	188.141	41458	15178.3	86124.4	22916.4	6263.3	7035.27	115326	31687.1	18647.7	9541.6	24808.7	9851.58	130928	17550.7	10197	6543.58	20484.8	13267.9	16205.9	17135.8	10671.6	6213.16	11783.3	29091.9	33007.9	11629.9	9447.01	11818.2	57972.2	15017.2	22402.8	3200.21	13786.8	58730.3	12189.2	7500.19	14391.4	21130.4	9354.44	11474.6	7966.71	3769.49	17302.1	19493.9	16600.6	8424.31
NEG	M134T103	134.062	103.022	12764.3	8867.37	16642.5	12279.4	14187	14698.4	15401.7	9854.91	11100.5	11443	14938.5	19918.2	28505.3	16061.2	13008.7	18467.6	10731	12218.8	15871	15283	9286.25	33468.7	13384.7	24114.5	12434.7	17894.9	8978.41	12311.5	16061.1	22616.8	19343.6	13413.1	14351.9	32942.3	25220.2	37082.4	12493.7	16466.4	19852.2	13490.2	16367.9	12682.3	8795.63	15878.9	13215.7	32946.1
NEG	M134T282	134.061	282.195	1707.18	2021.6	2405.38	2096.03	2398.45	2536.92	1978.56	1773.83	1976.03	1783.47	1998.68	1571.48	2159.03	1763.65	1574.33	2661.81	1902.42	1579.58	1757.61	1838.13	1848.81	1558.42	1794.31	2135.65	1591.77	1741.1	2167.05	2080.79	1973.36	1715.06	2056.64	1705.18	2412.86	1908.04	1505.64	2719.11	1376.28	1532.63	1602.23	1808.17	2359.75	2226.43	2433.84	1585.85	1872.08	3186.13
NEG	M134T374	134.072	374.353	502.301	385.045	1500.29	254.313	1215.3	358.874	912.017	1622.43	1345.34	219.672	578.835	404.935	995.132	393.721	1167.73	906.298	881.158	673.928	367.085	589.197	646.778	222.57	579.329	608.554	323.297	272.116	424.594	438.61	827.82	653.862	896.762	782.925	275.907	519.977	715.781	668.461	269.717	530.362	633.641	201.997	708.149	540.605	737.967	1138.48	604.831	203.968
NEG	M134T171	134.075	171.11	36163.2	25394.5	10142.6	8704.77	2031.84	15497.2	7831.15	28730.4	9708.69	34648.4	4863.01	11660.7	4553.9	1503.45	5200.84	5357.93	44247.5	2527.73	17985	5649.9	3620.93	6768.06	13844.5	3574.09	3140.68	5423.54	67450.9	15159	5960.57	15107.6	3577.72	13281.3	4516.17	4424.57	4985.2	14885.4	3225.96	9418.45	7123.64	7754.22	4750.88	7364.15	7125.32	6963.76	6443.9	3896.28
NEG	M134T156	134.075	155.548	18898.3	17253.8	9456.72	9265.24	7337.27	19612.6	10744.8	14501.4	12617.6	17382.2	9607.34	12225.5	10664.3	7296.34	6276.39	6874.26	17444.9	6655.98	10345.6	10171.6	1885.74	12013.3	15198.8	9905.43	7512.37	11822.5	34388.1	17110.9	10791.9	12082.2	5105.94	15161.3	7669.13	8460.47	7724.4	13283	5323.56	13993	7828.23	10755.7	8329.67	11044	10375.3	8412.32	6699.32	8068.5
NEG	M134T23	134.078	22.594	4758.76	3869.89	7039.31	10411	4051.99	29591.9	3836.94	5957.83	34577.8	5468.25	5962.38	38476.9	31118.4	7482.91	10753.3	19569	4036.57	44893.8	4886.6	19022	3501.73	6423.76	36623.2	3900.52	10285	33630.1	87894.7	27353.5	6909.6	12785.4	6798.32	35893.4	13670.4	3194.53	9849.44	25634.7	7571.06	38031	1628.31	14160.1	9495.09	7637.66	32236.5	5446.24	8711.78	12843.3
NEG	M134T311	134.072	310.564	1684.52	421.694	313.005	604.931	476.243	943.031	879.663	898.384	2176.75	251.304	563.922	914.049	1006.72	683.192	922.83	547.212	517.015	732.079	556.873	587.357	481.431	577.938	582.918	548.843	729.403	616.872	597.289	480.108	532.525	452.66	415.27	629.933	389.611	1053.17	940.402	618.822	783.573	555.081	586.951	619.319	660.203	974.22	569.988	559.768	685.135	713.683
NEG	M134T295	134.098	295.137	3469.7	1738.86	11591.1	3836.12	3714.78	6405.23	4374.69	7254.72	5734.83	739.559	6100.21	4175.02	6762.64	2545.29	4958.97	4888.09	4568.7	4031.38	3841.56	4026.82	4062.57	1737.09	4660.13	3535.32	4528.48	4400.53	5462.48	5001.38	4100.94	3990.59	6365.96	4359.05	680.927	1647.3	3983.05	5016.67	2036.71	3156.92	4985.47	3237.79	5541.65	3530.1	5586.98	6849.49	5184.18	1819.35
NEG	M135T162_1	134.623	161.654	449.651	4396.93	697.231	920.815	1642.75	807.132	682.792	1625.94	979.527	957.236	487.787	536.917	547.818	979.609	1026.7	1385.11	877.829	502.358	885.943	972.147	771.062	1007.73	1225.49	778.684	899.588	583.249	557.348	1775.68	939.94	1439.09	404.671	400.091	5133.65	758.967	1520.82	1683.12	505.825	629.067	792.985	488.429	936.556	626.233	1195.82	675.567	1095.57	587.471
NEG	M135T302_1	134.622	302.198	1459.22	838.904	1201.32	1335.52	1044.65	949.644	1436.79	1146.76	1158.85	1023.05	1091.03	1330.44	3705.45	2022.77	2455.57	1593.29	1192.9	1318.29	1262.38	991.541	1617.52	927.023	1506.76	1656.52	1271.6	973.512	1449.3	1642.77	2032.79	1711.77	1341.01	1330.53	1309.76	1085.39	2156.31	1843.43	1065.66	1618.48	1278.42	1093.15	1591.35	1300.13	1567.9	1774.87	740.276	1421.9
NEG	M135T599	134.895	599.25	23454.9	23068.4	20559	24823.1	27362.8	24643.1	18611.8	23181.9	22875.4	23379.8	26239.9	22126.4	23654.2	25237.7	23652.2	23891.4	25055.1	23858.2	24427.7	22402.2	19789.2	22116.2	23257	25463.9	23892.8	29871.1	21909.4	24117	22049	21952.6	20826.5	24489.1	34464.6	24059.4	25217	23635.5	26126	23008.6	21588.3	21656.6	24263	19314.3	22549.5	22848	22385.4	24721.1
NEG	M135T153	134.895	153.438	571248	671429	706538	628122	547274	542798	369545	675987	478952	539542	645227	686691	624529	303329	306144	282665	518084	453497	424167	914151	347907	609481	320159	715453	566765	507421	568069	414665	428495	768915	329048	512408	337010	692571	420038	283083	583325	884913	730246	578408	712815	572352	301571	753952	795683	271908
NEG	M135T202	134.896	201.867	1.817e+06	1.71252e+06	1.87565e+06	1.71135e+06	1.32011e+06	1.49163e+06	1.99878e+06	1.96831e+06	1.78534e+06	1.50259e+06	1.7289e+06	1.59757e+06	1.33711e+06	1.43849e+06	1.83025e+06	1.62409e+06	1.61015e+06	1.40821e+06	1.04347e+06	1.91812e+06	248611	681863	1.67739e+06	1.63214e+06	1.5133e+06	1.49712e+06	1.41892e+06	1.76485e+06	1.77002e+06	1.86683e+06	1.70017e+06	1.5826e+06	1.78227e+06	1.77781e+06	1.799e+06	1.8206e+06	1.53867e+06	2.11828e+06	1.7643e+06	1.65426e+06	1.58621e+06	1.11079e+06	1.66097e+06	1.87104e+06	1.89665e+06	1.53272e+06
NEG	M135T35	134.895	34.578	11645.2	14601.6	19911.3	27768.9	19953.4	11699.3	24520.3	19177.7	2610.06	11617.7	18035.9	17880.4	18358.6	14785.7	5652.83	24735.1	25214	12584.9	11616.2	31899.1	17150.9	19904.2	28617.3	1461.99	15587.5	2102.27	13752.6	14404.5	20950.3	9530.34	16315.2	17661.3	4591.16	20784.3	15243.3	3701.39	14447.1	17807.7	20731.2	13334.3	19741.6	13135.4	16368.6	21853.9	18637.6	1566.79
NEG	M135T256	134.895	256.006	67505.1	149780	95993.1	88394.5	70520.3	71223.9	101363	86554	65841.1	80538.7	174302	90052.9	75587.5	104549	76084.7	108788	87101.3	71458.2	93931.8	189669	163041	311467	132330	70986	112430	102857	73313.2	74514.5	113994	176733	61826.5	84114.1	101821	92385.1	486127	81487.4	74291.8	66707	132063	76270.7	96447.4	119323	99476	126587	94438.8	67895.5
NEG	M135T407	134.916	406.509	3121.21	1936.98	3052.11	3952.09	3739.45	3562.21	3463.52	2901.56	2514.11	2673.63	4351.47	3560.08	3958.48	4282.27	4159.45	4445.72	3326.54	3668.41	2984.43	3567.22	4273.41	2916.64	3245.19	3923.92	3439.86	3132.85	4067.18	4008.81	3636.29	3534.66	3241.93	3990.68	1694.74	3111.07	4156.55	4280.11	3608.47	3992.62	4019.68	3341.41	4254.79	3352.69	4362.65	4010.47	3753.07	3590.77
NEG	M135T330	134.926	329.883	1024.84	5806.14	1083.09	1265.89	1158.35	1945.87	1421.19	1705.86	2443.85	1802.22	1824.48	1233.73	2025.62	880.544	1865.41	898.76	985.863	1630.89	1034.44	1738.64	1577.23	1987.4	1020.4	1664.61	2117.17	1706.03	2032.59	1677.8	772.117	1918.23	2050.08	1330.43	4294.93	1414.04	1792.32	863.25	2017.7	949.75	2226.72	929.421	1958.76	1184.9	2343.58	923.598	1808.04	2038.78
NEG	M135T56	134.933	56.1605	50481.9	27909.8	46080.3	50390.3	54313.5	35236.6	45450.1	46597.9	42112.6	13950.2	27899	43384.4	44023.1	45446	33581.8	42627.3	40273.6	37690.4	20614.4	23673.7	8755.44	20403.7	20049.5	23537.3	24498.2	22508.2	22162.2	31047.4	26745.4	28216.3	19536.7	46970.6	20313.9	35284.6	39833.8	35034.5	52181.1	24029.9	33989.2	29428.1	23663.7	41272.6	33351.4	24323.4	40749.8	27098.5
NEG	M135T332	134.944	332.087	1082.61	5427.87	963.637	1202.31	920.221	1834.82	1136.8	1868.6	2286.31	981.584	1977.28	1177.61	1391	1513.01	1010.33	1786.94	1156.16	874.099	1136.69	876.57	1467.2	2247.88	2763.22	1545.86	1958.37	774.021	1272.23	907.985	2382.23	1808.75	1895.94	1223.87	4733.87	3318.13	1029.84	1500.44	1423.82	1099.44	2086.61	1234.18	1211.98	1104.78	1211.57	1026.91	2020.03	813.147
NEG	M135T16	134.973	16.464	4514.78	5117.02	6095.58	4952.28	1578.2	1264.43	5577.17	5859.3	10022.1	4529.29	5787.38	2477.42	5997.38	6440.13	1379.62	3886.26	5157.39	2200.85	2036.84	4958.63	1836.96	5151.98	6131.4	6225.11	3035.77	4286.8	7858.34	5717.29	4474.45	6167.17	3203.71	4548.31	1797.22	5571.36	4013.26	3809.02	4297.06	1745.82	3897	2801.74	1698.65	4899.36	3970.4	3600.71	2005.97	4909.31
NEG	M135T4	134.973	3.5095	2725.2	4548.88	4996.49	4773.76	2012.75	1856.9	4724.73	4178.82	4660.04	3797.51	944.438	2054.97	4518.81	4940.51	1149.77	1197.24	4350.63	1391.61	1125.54	5260.42	2224.82	4650	4934.77	4591.88	2981.01	4086.41	4481.67	4648.5	3164.67	4693.75	3486.14	4218.42	1083.83	5069.01	520.843	1533.42	3660.63	553.823	2463.27	1378.78	2914.4	4597.55	1616.52	2169.7	3633.49	4723.88
NEG	M135T37	134.988	36.607	2844.77	2133.38	6739.97	2298.7	528.474	2551.53	1604.21	869.097	1957.05	842.416	2010.24	2754.35	1529	2805.06	3799.04	2231.35	1041.71	958.482	2036.38	2760.9	1808.11	1678.65	2163.5	1416.14	3111.28	2515.21	3109.97	2760.19	1323.6	8093.09	4630.72	1079.91	3300.62	2270.81	2399.19	1299.26	1154.85	2494.02	1356.99	3358.3	2041.15	2703.65	2652.55	2289.13	3532.33	3032.37
NEG	M135T289	135	289.026	9897.3	1183.26	3189.14	3997.15	23698.7	11222.2	8433.18	38228.1	6970.27	8926.62	11077.4	2760.3	17776.4	1468.58	59513.8	2300.08	740.287	968.668	2334.89	5721.66	1698.69	20244.7	1450.33	6481.31	19769.5	907.747	1315.08	1199.12	2141.47	1782.8	15456.2	2162.22	47359.8	8312.52	1348.31	26294.4	8257.93	6300.87	17227.6	4407.86	3787.79	1492.55	1850.38	99513.6	2499.26	713.083
NEG	M135T24	135.017	24.167	1527.94	3419.01	6036.41	8463.04	7593.29	3601.41	1702.11	8461.49	5230.67	0	7776.81	8523.69	12388.3	26488.8	16555.1	8543.27	3792.94	32859.4	4531.29	6904.37	25213.3	4860.91	7885.52	7356.95	16665.9	7064.11	16908.1	2822.93	13808	5438.89	7802.13	10729.5	16044.5	5250.61	10295.4	8782.66	4351.36	4780.36	1705.1	5284.14	24843.7	7482.06	4674.83	7058.71	13268.6	3552.9
NEG	M135T315	135.031	314.849	433965	782599	382387	394361	382928	262611	349558	353548	516411	226802	459831	382753	514038	503517	757478	607813	354370	474781	936937	446266	505491	370338	509824	448568	326599	329279	424460	456086	623575	555789	445206	337226	1.21041e+06	443172	703912	769336	275956	636712	403116	432614	782052	396839	651593	476095	409196	554216
NEG	M135T162_2	135.032	161.703	149811	1.32556e+06	198451	215499	485773	205722	203778	418089	223677	274035	152725	150611	153726	266092	313844	373799	241975	144988	424954	350791	247715	253183	344169	222230	208066	220043	147973	480267	245899	386894	250608	152024	1.82698e+06	282445	362743	412666	151731	241890	270152	281055	561002	198780	332110	299961	294351	176718
NEG	M135T302_2	135.031	302.135	355402	240593	372173	388670	386969	395821	449885	378727	470071	284963	451578	454598	692274	709396	775467	476384	348696	457479	401714	446693	505171	311625	448260	549093	340399	266297	423128	434417	587321	476118	383542	438202	374781	361226	627081	618721	330144	536050	427967	358630	516125	410875	471110	539220	509121	444248
NEG	M135T340	135.031	339.867	37499.5	77127.3	41899.3	37136.8	48326.9	29460.8	34861.3	41109.5	52549.8	25424.8	40603	35652.7	62235.6	64726.2	68766.3	51106.8	38465.2	49510.4	53082.1	33897.6	42295.5	34197.9	43260.3	40687.4	31345.6	28862.9	43163.5	41280.5	54131.6	45461	37416.8	33302.8	106382	43936	56394.4	52004	26804.4	49404.6	31819.3	32259	77138.9	43920.6	43923.2	42509.3	42356.7	53428.5
NEG	M135T22	135.054	22.393	21558.8	21673.5	72958.5	23689.4	29945.1	6813.05	28311.7	3051.6	8879.95	29518.7	51106.8	8219.36	31615.8	12112.5	6843.96	6145.69	7829.78	3382.23	2627.84	4662.26	2605.03	4252.7	3704.75	140346	5665.05	7111.34	5337.13	1235.45	58732.8	38008.4	73426.4	9299.08	5485.78	1474.63	4548.68	4277.3	8907.21	5057.8	3454.95	5561.85	3893.27	3336.54	5469.67	8201.22	10596.4	35934.4
NEG	M135T377	135.057	376.638	1823.7	455.586	1425.61	1580.99	1290.81	1459.61	1969.73	1252.18	1215.77	2087.84	317.931	893.053	372.518	1164.85	498.644	731.44	873.201	753.516	226.554	344.597	232.348	147.64	375.307	100.192	499.372	233.821	464.784	214.149	441.947	311.799	264.576	1519.62	391.581	839.089	1268.88	1025.89	982.92	306.823	636.825	365.84	270.75	1058.8	1423.77	17.1274	766.515	623.67
NEG	M135T134	135.067	134.091	9227.66	17551.8	6171.91	5342.71	258385	23733.8	16064.5	8536.22	30317	5410.75	355955	17636.3	17533.8	25846.4	18974.9	5439.99	5537.19	13002	2885.78	6402.87	3475.53	5619.54	6445.56	7006.11	13762.7	4088.1	4662.17	5429.4	39856.5	7887.7	346927	16440.5	5574.6	8348.71	18642	61414.5	8514.34	7370.1	4669.22	10611.4	5608.72	5369.01	4697.25	12976.3	15414.2	7513.87
NEG	M135T33	135.082	32.708	656.241	2690.31	6058.41	8437.45	19927.9	32928.4	188321	2456.06	8475.68	458.099	95803.9	1831.91	20537.6	5468.24	178032	1131.54	2530.56	5149.93	1528.07	1208.09	766.621	3177.31	66048.9	5506.29	27152.5	10106.6	4442.46	11447.5	6733.33	106236	104669	1532.76	2911.14	1702.06	117765	9700.51	254859	652.426	2728.78	7957.23	1528.86	924.209	7768.08	2230.12	42347.5	6143.81
NEG	M135T143	135.093	142.996	4435.71	818.058	5138.24	1480.13	13583	2803.92	4474.65	2429.38	3966.3	3225	3244.61	2821.41	5205.35	7165.11	1878.57	2962.29	911.274	1094.44	897.881	1210.88	1632.54	1288.46	2341.26	9376.46	2061.02	2627.67	1076.5	577.904	2372.09	1365.18	226340	1675.49	1632.92	7962.25	7714.77	2896.37	3427.59	5470.41	1945.1	1014.57	8229.98	10313.4	12262.7	14446.8	13211.8	8055.22
NEG	M136T91	135.596	90.96	562.41	535.632	539.105	961.271	82.6621	132.634	284.278	451.009	1284.58	396.473	1529.94	1066.71	1950.93	2646.84	300.783	1167.53	750.959	165.029	868.783	1268.37	1828.2	1596.09	2603.71	2955.77	1089.8	1289.73	80.0047	1164.73	1789.01	265.133	163.619	540.917	201.132	3164.64	1464.57	1202.62	831.445	1259.86	1051.26	937.245	801.687	1045.97	3828.2	4007.36	873.504	840.437
NEG	M136T202	135.895	201.786	180144	179536	204372	175791	163838	158304	214513	186357	192170	172335	202086	177875	121394	183256	185895	174683	163618	164234	142472	200366	32644.6	162723	83931.7	179604	174545	172157	154665	198258	183106	194036	150975	165249	208113	202742	196629	187520	176207	217038	175944	175031	177716	114360	182975	188559	197100	144858
NEG	M136T154	135.895	153.505	39863.4	14362	16889.2	44417.6	11796.4	33804.2	47514.4	37442.6	17725.2	15672.7	20886	30591.8	34940	45472	40888.6	43661.7	43132.6	19974.6	34253.2	44298.1	17839.5	40832.7	14411.8	48119.8	36328.4	50590.8	15415	49182.5	41491.1	19404.5	40625.9	34798.6	23500.8	29877.7	44136.7	43768.5	37191.5	15778.7	51712.8	36758.9	34855.3	36618.3	13530.9	28279.3	33391.1	40781.1
NEG	M136T256	135.895	256.169	7604.08	12347.9	10256.8	8764.24	9682.46	7486.3	10758.6	9607.94	7301.26	9895.67	18206.7	7739.68	8808.03	10590.3	8222.65	11482.4	9378.43	7025.02	9695.17	8187.35	13026.5	27353.4	8983.49	7290.93	9820.97	10799.2	8787.76	8156.92	15587.2	9142.03	39752	9292.51	9762.53	10967.9	48361.4	8464.25	8096.24	7264.14	14306.8	8144.52	10343.6	15580.1	10194.3	15852.4	9723.9	7164.14
NEG	M136T30	135.954	29.6095	12961.5	94194.1	17891	11803.2	890.448	12282.7	12088.5	11278.9	19500.7	16241.8	4917.9	4537.1	9588.47	6145.16	1022.24	973.174	3207	4469.58	777.149	4186.84	2076.97	1865.99	6011.44	7759.03	3109.55	11687.8	635.365	1610.04	5265.43	0	262.915	9558.8	189112	15132.4	31999.2	897.987	9563.8	8621.41	1494.02	1749.75	6648.37	6414.31	3075.76	9846.92	9400.36	36703.6
NEG	M136T23_1	135.979	23.028	14558.7	12961	13402.6	7258.77	5055.02	5836.11	8850.63	9650.93	7022.3	2552.6	12095.4	3604.38	3382.53	13782.6	16279	2628.88	7271.37	8502.17	3734.04	1732.65	4317.24	3500.57	4802.4	5119.38	7138.15	17120.3	17749.1	4588.15	14319.9	8041.58	14555.7	21217	5472.82	7280.18	15657.5	3963.11	11035.8	12570.4	7740.26	12711.9	6862.47	8342.63	7669.71	21745.6	8956.33	19566.8
NEG	M136T359_1	136.002	358.779	1798.81	1745.1	1609.95	1638.53	1816.1	1295.41	1161.1	1485.84	1586.77	989.801	1842.16	1240.88	1760.41	1753.47	1892.77	1839.53	1758.87	1501.64	1324.88	1298.29	1119.82	1182.54	1448.65	1472.37	2152.4	1076.91	1197.26	2058.08	2226.29	1213.9	1453.64	1777.6	1663.73	1370.65	1694.7	1967.16	1144.43	2047.55	1838.81	1509.91	1781.07	1317.22	2128.05	2024.94	1796.72	1401.72
NEG	M136T89	136.008	89.39	114095	119787	140967	187425	32210.8	80227.4	139124	130573	182678	100230	341170	248602	489427	529473	120582	260131	147600	65976.4	195481	317331	542538	554855	858171	699226	528291	374795	35207.9	233384	751377	41869.7	50780	134035	52641.9	987714	863000	203779	339472	372228	234535	281583	657870	484539	891773	1.00155e+06	585274	481831
NEG	M136T286	136.008	286.175	6663.73	8132.95	5202.76	9300.22	7038.07	7081.78	8012.94	7576.52	5236.24	2478.84	10671.6	14398.1	20006.2	18754.9	11654.9	12567.3	6720.56	6565.33	10943	16301.2	14028	7689.59	13461.4	17353.6	9191.27	11998.3	13248.3	19247.6	12167.9	13421.6	16687	11634.4	6691.54	8580.98	13620.3	17278.1	9721.84	14262.9	14300.2	14745.4	10506.1	10974	22999.6	22632.5	11963.6	5293.05
NEG	M136T262	136.008	262.3	1667.89	1205.1	1229.14	1675.83	1745.34	1387.3	1817.27	1997.17	1896.87	931.194	2051.95	2378.47	3934.21	4841.62	2414.88	1551.95	1273.72	1893.91	2319.21	2751.33	2158.74	1923.86	3697.51	8875.51	2295	2299.95	1150.52	1660.18	4463.38	1173.49	1003.94	1503.18	1034.02	7828.24	6711.65	1650.67	3935.81	2839.16	1723.22	1427.35	2854.72	5297.33	5202.27	5260.73	4523.66	4155.61
NEG	M136T23_2	136.025	22.936	20556.1	57047.6	23318.6	12247	5357.84	6048.57	14528.4	13895.7	6262.07	10496.3	13113.3	9074.02	16936	14821.2	11426.2	7937.96	8982.1	9197.06	4345.26	10899.7	1404.54	5461.55	3536.84	10772	8338.6	11629.9	11215.9	4000.27	9852.72	7670.07	12365	16915	87167.3	4607.4	7373.4	5118.8	9436.63	15286.4	7705.21	8694.48	9479.03	12982.8	8607.87	12859.9	22436.8	30412.8
NEG	M136T315	136.034	314.909	20905.1	38045.4	17758.6	19452.2	18333	13459.7	16741.2	16685.9	24900	11640.6	22287.3	18288.7	24344.2	22329	35142.5	27996	18113.3	22766.2	43930.1	20047.2	23634.1	32348.1	24185.2	20930.8	17147.8	17479.1	20009.8	21772.8	28553.2	26187.8	20466.8	16156.9	58370.1	21886.9	32217.1	32249.3	14358.9	30540.1	20208.9	22817.1	36316.7	19543.6	26803.6	22841.4	19138.8	26291.2
NEG	M136T302	136.034	302.135	16849.9	12066.1	17647.3	18292.3	17259	19371.1	19557.3	17862.8	20771.4	13847.5	20576.9	17717.4	30647.6	30910.5	32429.6	20798.7	16628.7	20345.8	17510.3	21340.2	22985.3	13864.7	21045	24529.5	16255.3	13615.1	18468.5	20708.7	24919.1	21855.2	18187.3	22185.6	19501.5	17905.1	27523.2	26896.4	16170.5	24344.6	19485.8	16862.1	23831.7	17671.4	20112.6	24373.9	23387.4	20256.6
NEG	M136T162	136.035	161.711	10399.5	85468.1	11771	15478.8	32605.3	12779.6	14033	28942.1	16862.7	18277.5	10997	9479.3	10475.3	18460.1	21883.6	26107.5	16449.3	9246.44	29555.8	22133.4	14955.4	18200.6	23882.2	13318.6	13779	15111.4	9883.03	31950.6	18684.5	27116	16258.8	9864.48	120662	21559.8	25871.8	28043.6	11338.1	19518.3	18117.6	18037.2	34920.7	15225.5	21813.6	19092	19870.9	11527
NEG	M136T74	136.041	74.304	79768.1	85067.2	95322.1	94892.5	100244	80941.4	70312.7	74509.2	84821.5	66923.2	123431	109638	84362	117701	92698.9	101124	88669.2	117162	82507.3	96265.6	79566.6	109624	127146	118846	105109	87616	91119.4	116738	78928.9	163867	178703	120514	132741	115687	154123	169011	112295	104805	110807	107596	81140.9	54527.6	87545.2	85258.4	61108	121380
NEG	M136T94	136.041	94.111	54171	51489.9	166164	56692.2	72525.3	47101.5	43546.4	45823.7	49754	46199	63418.7	57568.6	42700.6	43255.8	60197.7	58145.5	55262.7	86237.1	49271.7	45547.7	45489	46549.9	49220.7	40628.1	50753.7	39282.6	67073.2	72509.7	1.00385e+06	118204	64834.8	71836.8	97520.3	1.31332e+06	44298.5	97418.2	51841.1	50423.7	246582	53423.5	915420	28523.8	21419.3	1.16926e+06	23722.2	48064
NEG	M136T359_2	136.052	359.436	7715.31	6006.11	8478.4	6704.17	6359.04	5564.52	8738.59	6180.33	6087.64	5407.02	7864.65	7502.56	7996.13	6616.37	6882.36	8816.23	5595.02	5294.75	7227.83	6634.38	9981.86	6448.04	6942.2	6379.37	7189.88	5203.17	5753.72	7101.16	8652.4	8940.61	6476.93	6692.09	9974.96	7258.78	9478.86	6569.96	5616.22	7222.97	7006.36	5811.46	9677.45	7691.36	9357.77	7596.28	9178.7	9444.76
NEG	M136T281	136.077	281.165	2478	1464.61	2002.67	1956.41	1998.43	2103.04	1569.83	1734.71	1867.14	1451.25	1727.28	1623.75	1667.86	1960.52	1736.44	2621.95	1378.98	1581.75	1435.15	1114.89	1979.24	1300.52	1945.04	1868.46	1708.11	1371.87	2252.3	1779.69	1728.28	1707.24	1785.8	2711.52	2789.3	1336.55	1151.22	2355.68	1504.95	2206.84	1707.1	1233.85	3275.76	1742.18	2075.19	2609.86	1471.97	1696.78
NEG	M136T239	136.088	238.734	3996.15	771.474	2797.82	2385.05	648.283	1594.34	3567.8	2124.25	2654	2037.51	1099.94	1541.86	2954.97	2113.16	847.556	486.682	779.313	772.576	971.167	498.483	1159.37	1092.41	1208.4	4184.49	821.431	1757.51	672.324	490.133	1640	821.088	905.471	1189.59	783.811	5402.1	4799.38	1395.67	2243.02	2722.48	472.726	426.86	5936.42	4900.28	4029.93	5414.55	5767.27	6296.12
NEG	M137T202	136.892	201.938	571133	564852	565582	579474	508219	526037	590666	595448	548005	546776	573628	515717	548018	577954	597056	541781	485554	462327	440347	580111	84541.4	202667	506847	548536	514439	509161	462006	586931	553106	593753	565854	503601	591935	586124	600770	584734	534052	309901	587319	510870	536415	353047	570999	548093	562428	543639
NEG	M137T154	136.892	154.498	258441	81872	108336	236652	64848.4	185940	114808	228098	107607	181173	257845	222718	237528	283336	287743	90897.2	198257	82094.1	110771	88522.6	127251	223839	109230	239775	174766	192113	205158	104399	99375.7	107047	110562	212735	272291	256255	270016	101832	223365	115960	119947	93440.3	273551	208132	267725	290052	275868	88284
NEG	M137T256	136.892	256.006	23895.7	43745.9	26399.6	24661.6	23820.8	21386.9	27678.4	25024.4	22022.2	27428.7	23077	21125.8	22591.3	31369.6	23927.7	34735	23678	22822.8	28585.3	60753.2	40272.7	36399.6	97874.7	20697.3	14967.6	33954.4	26282.2	20477.7	36206.7	45242	44991.2	25302.1	30564.8	31059.7	21024.3	18945.6	21834.8	20085.1	39152.6	21326.6	29971.1	48607.7	29392.6	151166	25667.9	20312.1
NEG	M137T35	136.892	35.045	4322.21	10841	3906.05	6451.38	4013.03	3044.9	4766.42	3862	4958.57	3333.49	5572.65	4220.98	3638.66	4322.29	5385.73	5092.59	3697.84	5509.94	4765.1	4616.31	2802.3	5161.41	3615.17	4313.48	5007.34	3249.48	4220.72	4159.15	4431.19	7246.85	4730.98	4001.11	5086.36	4789.77	3979.76	6382.58	3077.51	3219.35	4250.24	4933.11	3687.6	4814.8	4943.42	4893.85	5293.13	5297.74
NEG	M137T56	136.931	56.159	48523.7	30945	55509.2	53127.8	52400.6	37348.2	53034.2	45125.3	39613.1	14241	27503.6	39708.8	42993.8	43634.6	30583.7	39450.7	37647.8	40724.3	20755.3	24440	10048.7	21266	18932.6	25619.3	27271.8	20482	22254.3	30878.3	26560.3	31532.6	17635.3	44547	19722.7	35354.1	42896.6	40973.6	53964.1	26139.5	40440.4	30905.9	23692.1	43578	37087.6	25712.2	44936	34532.2
NEG	M137T17	136.937	16.728	9873.41	5214.23	13085.5	12468.2	7729.04	11469.4	13798.3	10346.4	11423.6	5287.41	13494.7	7243.41	9365.33	7469.92	22828.8	8318.14	19079.4	5655.41	5856.87	20716.7	9237.3	7173.2	12072.7	20538.3	12954.6	12356	19918.3	11474.6	7346.07	22456.2	10256	17840.8	8941.85	13622.4	13233	12321.9	8297.04	11013.9	23408.8	13355.3	11286.7	9797.46	8528.97	13499.4	6755.85	13985.3
NEG	M137T3	136.937	2.7315	5964.7	4286.1	6111.03	6890.99	6237.43	5650.62	6446.45	5187.89	10142	6609.98	4133.33	8609.79	7479.18	11057.5	5156.38	4815.78	6283.1	6582.8	8311.61	7387.78	6226.55	6299.5	3972.64	7503.77	6241.23	5031.47	6083.21	6067.52	7487.4	5373.72	8767.46	6394.04	4416.62	3659.69	6255.8	5878.18	8288.31	3693.27	8760.74	6443.73	10697	3440.79	7878.01	8191.08	10868.8	6946.34
NEG	M137T572	136.937	572.345	66162.9	44956.1	71083.1	59145.4	37293.1	41553.2	53724.9	88356.7	58013.5	92369.9	62853.8	40727.4	47735.9	57705.7	71049.4	63057.5	44998.8	39031.7	61864.4	50141.6	64842.9	56376.4	63011.6	64344.1	89082.1	55133.9	61777	61630.1	57390.1	63070.9	57384.3	73230.1	104409	83779.5	75013.6	56782.1	58339.4	52910.6	64136	38609.3	69467.6	54926.5	79152.1	64991.4	54825.3	58251.1
NEG	M137T334	136.976	334.435	1327.45	1261.92	525.272	317.946	297.653	384.597	1088.59	434.493	685.936	1130.16	445.252	359.171	1005.52	1460.89	667.728	717.442	409.528	1009.15	1266.89	1223.61	466.647	1525.14	1326.53	395.252	472.653	603.406	471.17	463.433	531.168	388.982	1714.04	947.826	643.05	436.226	465.554	565.751	1047.36	491.703	535.07	1166.39	1693.79	1135.3	1038.28	1384.08	324.749	699.154
NEG	M137T46	136.992	45.625	21655.7	17242.2	11181.8	12302.3	7728.32	8885.1	13808.6	32116.4	11772.7	8578.45	21500.8	15746.9	6030.74	12720.4	18711.2	8413.56	25610.9	14667.3	10882.8	14303.2	8617.61	10263.8	16954.2	31232.1	13263.7	5464.15	10892.6	24624	12586.1	12649.4	18187	14919.5	13975.1	15764.3	13778.8	17764	22997.9	16838.4	32039.5	9467.67	11634.8	8634.36	14217.4	15354.2	18797	20519.8
NEG	M137T273	137.011	272.974	1620.23	1793.15	1755.13	2383.98	1992.75	1988.42	2094.91	3630.7	2180.29	1961	4749.73	1724.51	2357.59	2698.38	1748.77	4009.27	1750.94	1571.88	2500.78	743.309	2137.54	1582.57	3589.52	2109.92	2220.76	2013.21	2048.79	2473.17	1901.13	3736.24	1949.5	1497.22	2444.9	1834.26	1981.54	2382.87	1664.93	2003.92	2019.71	1852.1	2033.33	1886.74	2061.17	3583.82	2538.58	2033.44
NEG	M137T90	137.011	89.609	10253.2	11269.6	9132.08	12538.7	8310.38	7242.05	9398.73	9877.97	18403.5	9739.46	17001.6	10245.6	19927.8	22827.7	13396.2	12785.1	6998.77	9007.3	9044.37	20881.4	22804.6	11469.6	36573.6	29647.8	23283.5	23152.8	7703.8	18410.4	29150.4	11124.7	9671.96	10082.9	10989.2	42112.7	34962.5	11492	26147.2	17223.6	9343.25	23249	25001.7	17664.4	38499.4	36857.4	22980.8	22664.6
NEG	M137T38	137.025	37.813	81130.8	340251	79096.4	32470.8	53213.2	37222.5	92544.6	56159.5	171118	104293	33755	175924	82150	168971	292524	143406	87508.7	72754.7	38418.1	60859.1	81125.8	110685	179764	88176.9	136159	89786.9	94840.9	51207.2	128799	115775	73434.9	117569	105952	42353.6	147927	129944	55612.4	50171.9	32063.3	106300	162229	85561.2	150544	81106.6	58472.5	95520.4
NEG	M137T359	137.036	359.393	20562	17607.4	22879.7	18005.1	20374.1	16774.7	17650.8	19796.5	20711.6	12570.6	20303	20725.2	20160.9	21237	19810.3	24770.2	17519.6	16295.7	18855	14184.4	24254.3	19651.5	18854.2	16081.8	16316.5	14799.6	19532	18713.7	24361.2	22758.3	17753.3	14936.6	28208.1	18700.3	20601.7	23394	17015.5	21268.6	23134.3	15441.7	22927.6	20433.3	20114.6	21382.4	17508.2	22756.7
NEG	M137T270	137.036	269.517	2718.6	2520.44	2938.8	2180.99	2242.9	1750	2901.28	2952.5	2732.93	4362.81	4242.42	2816.9	1625.21	3618.01	2934.68	2774.44	2240.28	2565.66	1576.85	2717.08	4341.66	1623.99	2920.6	2839.01	2835.86	1911.47	2661.1	3165.85	2228.01	2958.5	3056.69	1815.34	3219.52	3144.24	8248.62	3747.6	1834.76	2612.93	2589.55	2563.67	4962.74	1743.82	2647.88	2891.78	3174.19	2837.29
NEG	M137T303	137.035	302.765	5284.9	4076.43	6449.69	5355.55	6727.51	5272.48	7347.68	6684.32	7059.35	4343.02	6379.85	7578.47	8229.52	6239.99	14812.7	17038.5	5874.82	6448.47	14160.5	6216.39	7635.8	4867.42	8806.83	7630.9	5508.74	4332.2	6668.1	5371.35	7396.66	11960.3	5393.12	7420.37	17720.5	6438.07	8345.11	17425.1	4873.48	8302.76	5930.52	4523.51	8336.84	5898.04	14783.5	7660.11	15383.8	15967.9
NEG	M137T74	137.044	74.181	8935.29	12414.8	5440.02	7714.51	7169.84	3369.19	3197.1	5178.27	2400.54	3924.59	9369.64	5743.32	5041.51	4486.69	14821.1	7721.04	8336.84	10300.5	9275.95	4263.94	7818.01	5970.21	8330.24	5128.96	5732.11	4434.72	6155.71	8696.78	3644.12	12159.3	14605.5	11731.5	10788.9	10301.2	5638.54	10644.5	7099.95	4460.42	8682.54	8380.73	4189.88	2716.39	4287.19	4983.22	9367.81	6032.62
NEG	M137T22	137.07	21.7645	9777	10690.4	5562.33	758.788	694.996	1398.44	64071.1	1281.32	3856.79	1191.87	267.752	1009.63	2599.84	9164.15	347.439	2666.83	7570.54	896.342	4484.37	415.589	636.554	701.598	374.01	465.031	3269.35	2484.17	549.365	1665.53	7354.4	6339.01	1741.39	948.219	1287.86	1592.42	451.029	2673.92	11185.4	1119.21	1138.47	487.385	4037.88	392.896	9347.26	1344.99	11857.2	21448.5
NEG	M137T47	137.097	46.879	15652	14044	24881.7	13455.1	11954.8	43594.2	30439.3	18467.6	21456.6	10701.7	18213.9	21093.3	16736.1	24696.5	20527.3	16470.7	21584.7	18748.3	10428.3	15753.9	4822.88	15945.8	8610.86	10111.9	14744.7	11279	7120.98	15585	8588.61	11153.3	10760.7	19736.6	11167.1	28527.5	18545.3	16758.7	21408.4	15523.9	18934	21300.6	6911.22	12880.5	11956.5	11534.1	14784.5	9226.93
NEG	M137T96	137.098	96.134	8516.25	10084.3	13105.7	8419.67	8037.63	37445.6	15375.4	10050.2	9706.91	10782.6	739.361	9967.08	12480.7	20619.3	12850.8	8593.56	16127.2	9045.9	7567.59	7822.23	7252.08	5691.25	4678.63	8408.08	12303.6	6592.56	4458.33	9053.49	5742	5585.12	2678.54	9212.11	4713.69	12460.4	10545.7	9751.03	10695.1	5602.86	6678.11	13898.4	5175.32	8342.75	7362.85	7158.39	8839	7053.46
NEG	M138T202	137.892	201.643	61842.5	58603.3	64844.9	55720.3	53785.1	38578.2	70849.3	60508.1	64216.5	53282.2	57459.3	50012.1	38481.3	62477.2	59830.2	56681.2	53064.8	49695.3	43630.1	61362.7	13664.9	24262.2	55288.6	59535.7	60023.1	59201.3	48281	60462.1	59401.2	61248.3	57580.9	53553.6	62735.6	61791.9	62495.9	60015.9	53062.1	65212.8	68532.3	53984.9	56468	26814.9	45995.9	64607.2	61957.2	60532.7
NEG	M138T572	137.936	571.868	4067.13	7112.87	6336.53	5050.32	6751.61	4374.72	6566.05	5370.16	5490.33	350.016	4612.4	4613.31	5022.85	8445.09	8681.29	4796.1	6196.02	9912.07	5523.35	5786.8	11069.9	4573.66	6430.77	6461.14	4562.13	5295.52	4671.87	4874.31	5788.31	6325.73	6641.49	5085.65	4818.76	4987.23	5926.6	5735.47	4933.94	4978.67	10462.4	4890.87	6125.95	5043.75	8025.3	5781.52	10180.8	5748.5
NEG	M138T30	137.949	29.604	3891.38	34923.7	7016.49	4723.54	3589.53	4088.25	5596.94	3970.68	9355.06	7095.48	3371.85	6683.95	3263.4	2268.94	6718.1	8284.94	4401.88	5883.65	4906.56	1207.05	21182.1	3063.74	4486.69	2408.12	1136.34	3711.46	2686.17	4537.98	2094.05	6099.95	3080.19	2979.38	70989.2	5262.25	15432.5	6388.78	2894.9	3333.17	5459.21	4094.22	3039.22	2799.59	1176.03	3896.9	4312.02	12364
NEG	M138T282	137.987	282.292	4345.78	4450.87	3118.87	4653.8	469.36	485.997	3130.06	3154.64	5638.6	3201.12	641.323	428.342	1068.83	1821.31	3941.09	433.436	4563.9	518.874	4157.65	1046.6	5485.39	924.9	1234.67	4811.82	1634.46	2488.07	4248.51	524.492	1777.74	5435.27	1379.51	3565.74	4197.26	3188.62	406.106	853.658	1020.6	786.76	665.443	554.1	4662.47	599.895	722.464	3220.13	693.696	2315.29
NEG	M138T332	137.997	332.399	4423.77	1814.66	3638.52	4117.94	3210.03	3274.1	3220.91	3753.56	3527.38	2785.93	3695	3839.07	4056.95	3943.92	3870.78	3876.77	3691.97	3007.49	3638.89	3765.82	3881.66	4079.18	4083.96	4029.01	3537.82	3323.74	3514.6	4918	4194.4	4857.44	3257.38	3341.12	1674.14	3750.48	3901.07	4964.66	3398.48	3879.34	3675.8	3768.97	4199.06	3324.91	4600.07	4341.4	3495.36	3353.8
NEG	M138T194_1	137.994	194.323	8163.92	11613.1	633.34	2235.73	1663.69	9304.41	2281.09	2061.13	1241.56	208.395	11108.9	1573.52	1760.25	1965.1	1537.81	5482.15	1117.94	1203.56	6360.17	2164.82	2349.45	828.62	13718.3	1836.16	5305.1	6061.96	8462.22	2518.56	2348.12	2606.84	858.783	1366.32	2040.64	10439.1	1530.53	2284.04	8135.03	2314.17	1680.44	13873.1	1071.13	986.74	1804.14	2221.46	1713.08	1820.36
NEG	M138T90	138.003	89.7815	4329.56	8158.76	4054.96	8281.28	25464.8	4910.51	7868.46	4978.6	14179.6	3186.85	25101	19016.7	24836	22403.3	38726.1	18228.3	8332.62	4517.07	11245.2	13823.8	23383.2	14998.1	37397.4	29530	13801	11875.6	27854	16922.4	46747.6	2566.19	39881.3	25233.4	3144.53	64159.2	32865.5	10642.9	15446.7	15874.3	9405.4	17048.3	27098.1	16922.7	32719.2	42366.1	24327.5	26345.9
NEG	M138T315	138.039	315.396	264.807	3005.65	322.848	4121.07	390.987	225.561	721.176	365.662	720.723	293.56	329.207	363.251	423.593	3702.78	3651.06	3407.57	1172.21	2734.79	214.506	2864.37	227.728	3125.94	4213.86	332.994	2915.3	2579.29	262.583	3665.14	3810.78	3699.07	3250.92	476.568	3764.02	3189.57	3018.06	4066.61	290.576	255.799	3276.43	2293.22	5109.35	2324.99	255.992	3443.64	4033.66	3403.66
NEG	M138T194_2	138.056	194.113	6116.61	2907.96	5050.53	3186.99	2707.3	5394.04	3803.46	3751.72	5159.74	3171.33	4998.26	3397.21	2647.48	1599.61	3158.38	3878.79	2213.94	2344.64	5802.84	2973.16	3928.97	3417.41	4508.97	5025.61	3526.2	3185.28	2062.4	4227.89	4854.66	3339.13	2561.45	2881.56	2334.98	7290.42	3859.7	3703.8	1824.99	5143.77	3273.81	3781.97	4742.77	4931.98	4206.2	4748.15	3053.88	5729.43
NEG	M138T40	138.056	39.845	20927.2	21832.2	12821.5	20905.8	25738.2	20382.2	19528.6	31507.2	29888.5	13954.5	14006.3	28126.2	29661.7	17208.6	30774.3	14539.9	17492.9	17759.4	31311.3	13872.1	10887.8	14715.4	22028.1	24064.3	20162.6	13890.9	13348.5	16794	32851.4	24692	16378.1	25272.7	23208.8	13394.8	23553.3	19893.5	17565.5	19241.9	18906.9	13612.2	37561.8	14133.7	12456.3	30285.1	21461	23832.5
NEG	M138T372	138.056	371.948	950.759	947.736	2346.87	906.733	2166.77	1037.41	1052.88	1850.79	2664.33	365.696	1706.08	1463.57	2427.81	824.716	2768.5	1586.02	2027.62	1428.84	751.499	994.908	691.629	715.779	840.562	2073.35	1168.47	828.46	1595.75	1362.73	1271.08	1723.86	1432.96	2185.61	574.29	892.527	1408.83	1509.63	1006.01	1587.53	1227.15	861.01	1238.68	1595.01	1000.84	2458.17	1834.89	823.881
NEG	M138T298	138.068	298.085	21472	5615.38	16774.3	14176.6	6115.01	12459	18861.9	14725.4	20815.2	11886.4	9905.76	10947.3	15780.4	11362.3	7952.86	8837.82	6915.24	7643.41	9202.64	10101.2	13189.6	9187.8	11971.7	20442.1	11679.9	12746.8	4665.23	10067.9	13279.4	5906.23	4448.57	8832.35	8264.11	28418.4	22508.7	8333.63	15575.4	14407.4	9062.75	7655.99	21786.3	18534.3	17441.8	24378.2	22503.4	26271.3
NEG	M138T317	138.093	317.303	4324.93	2590.61	16397.2	4610.28	8893.49	10846.3	5763.36	9451.05	9091.56	1721.24	7835.9	5885.2	7962.65	2004.91	7385.21	7342.6	5176.22	4865.91	7179.53	5301.78	5194.43	2500.72	5618.96	7278.04	4414.13	5697.13	4946.28	7017.1	5099.78	7069.69	9542.24	6582.12	1251.12	3040.04	4537.54	5970	2931.93	3721.15	7306.3	5260.46	7223.56	6422.72	8954.88	10160.8	6771.67	2279.95
NEG	M139T272_1	138.606	272.387	1407.94	1920.8	1767.77	1786.02	1716.54	2006.29	1768.65	1513.19	1723.41	1909.94	2056.02	1611.65	1744.47	2506.19	1951.14	1044.7	1813.25	871.506	1707.88	1629.79	1889.63	1705.23	1931.07	1408.26	1728.56	1698.56	1574.23	1970.89	1652.36	1815.17	2050.52	1629.16	2334.87	2047.41	1991.05	2028.74	1549.27	789.975	1813.58	1765.19	1801.4	1362.33	1798.05	1742.8	2090.79	1830.79
NEG	M139T50	138.875	50.338	993.527	726.643	291.809	610.707	653.285	271.941	1023.34	907.169	305.836	545.385	986.479	542.636	466.978	689.067	260.341	55.5942	481.67	478.542	550.851	1162.01	6857.21	799.774	562.783	1355.99	533.896	158.558	963.448	1078.38	1180.61	596.695	3514.84	263.867	0	909	1044.4	865.375	449.14	465.889	0	784.397	0	528.423	354.136	1320.57	809.586	848.5
NEG	M139T152	138.874	152.127	1124.16	1581.9	613.506	918.279	1002	929.021	1726.45	555.913	440.612	913.22	1640.02	1270.4	991.091	559.075	368.706	1480.69	585.491	924.116	888.968	1451.36	328.109	1637.31	1731.36	447.829	945.595	1068.34	789.69	1517.46	1542.91	543.691	680.481	1071.3	1577.19	1521.68	1485.55	1308.32	1348.53	1516.45	1454.54	1045.3	1477.85	949.505	372.459	1207.01	1772.75	1687.53
NEG	M139T201	138.89	200.585	15822.2	14832.6	14930.1	15131.9	7853.12	13183.6	15309.2	15021.7	14671.1	9381.11	16422.2	9114.72	14485.3	15818.4	15914.6	13867.3	12514	11646.4	8259.18	5955.25	3453.16	12258.6	14597.9	7550.46	12557.5	10304.9	14183.1	16029.3	14562.5	15272.7	14338	16838.8	14329.5	15521.5	15414.6	16103.7	9423.56	16001.3	14828.3	12730.2	14537.1	12128.5	14999.1	15559.4	10421	8380.87
NEG	M139T673	138.911	672.736	3486.23	4178.65	8496.92	2691.78	1786.79	3838.38	5403.18	3600.81	3633.86	861.739	4333.9	5332.37	3811.92	4575.15	2903.07	3723.71	7329.19	3454.39	4184.53	3741.5	3010.26	3073.04	2677.28	3421.36	2268.6	3121.36	3120.43	4937.38	8975.09	3300.91	3499.33	3580.36	4225.39	4471.18	3153.86	3940.01	3218.61	2832.18	1073.9	2751.72	8140.28	3487.22	2324.29	4511.55	6941.77	3410.58
NEG	M139T607	138.911	607.14	15694.1	20098.7	14292.5	18901.4	22377.9	18160.7	17540.7	17076.9	14528.9	24055.1	18915.3	21263.8	19857.3	19550.3	15902.2	24975.7	15073	18805.7	13980.2	19765.1	13700.9	18068.4	16177.4	17017.5	23656.9	17083.5	19526.6	18769.5	13160.2	18591.3	12978.7	16270.9	21996	16449.2	25793.2	22040.5	21259.9	19650.8	13677.9	18616.5	18750.5	21263.1	17660	15656.9	17396.8	29256.9
NEG	M139T637	138.911	636.934	3173	2441.71	3995.17	3193.75	587.322	4159.99	5228.22	4331.48	3644.66	4460.53	3532.2	6259.67	2895.01	2527.86	8818.65	4644.77	3675.95	3812.77	2627.38	4533.79	3825.24	3313.53	3295.08	3947.28	3077.88	3700.55	3707.52	4351.2	3759.94	4086.09	3733.93	3489.36	11789.6	7405.8	4932.76	3734.21	4196.65	3366	2852.71	2753.99	3175.01	3865.08	4458.61	5298.82	4857.35	4557.22
NEG	M139T707	138.91	707.177	2820.66	1426.87	2438.83	3111.41	1974.31	3233.8	2868.06	2044.32	1928.6	4746.29	3001.56	3058.97	2984.74	2696.47	3080.17	2328.45	2158.27	1861.94	1961.39	2847.05	2254.18	1960.67	3831.37	485.966	1928.14	2432.01	2514.43	2185.31	2351.74	2488.77	1818.87	2217.88	2324.02	2577.76	2223.39	2854.7	2183.27	2194.13	2084.34	2848.98	3181.86	1953.02	812.703	2669.97	1820.77	2741.39
NEG	M139T343	138.942	342.537	9613.42	6025.42	11160.2	10716.4	11266.7	9640.27	11746.6	10725	11223	9776.04	10438.9	9999.94	11913.7	13049.6	11315.9	10963.6	10748	10362.4	9243.51	9847.43	13380.1	10276	10802	10933.4	10547.2	9771.76	10009.6	11332.5	10314.7	11732	10051.1	10240.8	7141.15	9936.81	11023.8	14347.1	9768.62	10865.4	10545.6	9308.17	12187.8	11006.8	12591.3	11517	11445.8	11487.7
NEG	M139T361	138.942	361.469	9832.38	3539.71	8186.47	7786.74	6748.96	7800.78	8100.33	7657.78	7491.26	6748.82	6175.54	8044.49	8207.69	10346.1	8988.61	8530.12	7265.01	7600.18	7421.16	7735.88	8869.76	8024.11	10643.1	10186	5896.18	7985.9	8467.04	11482.4	7882.61	12383.1	7601.41	7668.27	3489.07	8980.38	7461.61	12464.1	8939.7	9389.27	6886.41	9054.2	11142.8	7911.66	11455.3	8912	6406.36	6722.78
NEG	M139T391	138.988	390.539	2582.3	2140.35	5014.73	5033.93	4311.88	2098.05	2642.69	2930.12	4222.83	4661.55	4791.59	3947.51	2193.68	3235.71	4009.72	6229.53	4311.3	2007.1	4136.61	4131.72	3148.83	2289.73	5480.32	3298.47	3549.71	1556.67	4405.89	6182.95	5090.49	3068.13	4442.08	2659.11	9786.12	2899.85	4455.56	5819.36	3061.09	6708.6	5320.24	3419.42	6236.29	2427.21	2847.69	6254.36	4270.61	3094.2
NEG	M139T355	138.999	354.732	17028.3	14006.9	29351	34980.6	27197.7	11138.6	17961.8	17459.8	16807.9	11189.9	15442.2	35260.5	12174.8	17986.2	21992.2	33607.3	29079.6	11672	29729.6	28152.7	15371.2	18479.2	27976.8	23325.1	15788.5	11146.8	22250.3	37025.9	37544	14991.7	30426.7	12492.7	29900.5	24604.3	22083.4	34215.4	31399.1	34531.3	31004.7	11148.3	33866.5	10730.6	15454.3	26921.2	18083.5	18169.8
NEG	M139T197	139.007	197.06	3145.26	2362.13	1794.98	3018.26	3506.78	8527.68	4264.85	3453.33	1882.03	2442.89	1676.59	2327.87	13566.7	4615.77	2141.36	3165.68	2165.55	2765.59	2005.16	1477.17	1877.49	1817.24	2333.74	1999.81	2349.82	9115.56	1984.05	1692.82	1030	5477.96	1612.68	1641.13	1937.91	2259.12	1539.39	1708.51	1960.59	2732.52	770.786	2908.89	6202.75	2400.3	2898.59	2387.29	1121.98	3836.72
NEG	M139T693	139.008	692.509	2679.1	4554.36	406.117	1565.63	2274.69	1568.41	1525.84	2800.39	1438.74	2180.83	1780.79	3816.9	3395.87	283.803	1640.82	1627.65	2931.6	2354.63	1702.25	2346.7	1503.66	3000.9	295.594	182.86	2570.64	2514.22	2249.57	1670.41	1818.92	1732.15	157.891	1456.8	1428.84	7835.06	1527.11	1604.19	2814.43	2283.22	1749.48	2353.5	2027.73	2200.9	1569.81	1573.81	1697.06	202.408
NEG	M139T78	139.007	77.639	58250.4	37067.3	25098.6	35942.6	23861	22806.1	33597.7	75600.2	29975.1	41921.3	36206.7	21193.9	19780	65591.2	29401.5	34145.9	22656	25370.6	38794.5	44856.7	25157.5	17893.1	17868.8	31641.2	28972.9	19018.4	17907.2	50846.8	28336.1	23197	31815.6	20217.8	21706.2	33091.4	36536.8	28825.1	33737	25600.6	24347.3	25240	21883.5	14467.7	24720.1	26371.6	27255.3	43077.5
NEG	M139T30	139.016	29.863	2448.82	471177	5694.46	7334.73	4756.39	4666.45	2529.48	4222.03	5122.8	1895.63	20818.7	8095.47	108956	12867.6	3719.18	2688.17	2203.87	5633	2183.39	5276.1	2289.97	5281.88	612.613	4067.95	7139.63	2391.04	4655.24	3044.98	3050.05	3278.34	19706.3	7793.3	5920.83	2475.37	2299.83	1869.2	6300.24	2985.49	5217.48	3708.65	2200.29	3259.68	1349.68	2098.34	3571.82	3288.24
NEG	M139T272_2	139.027	272.391	524446	610838	615997	713990	563432	605799	625525	592942	692948	572685	619157	548011	640510	895584	654996	639251	547211	573257	579662	510647	559119	544427	642448	634510	602733	565089	571122	757320	584704	684467	593545	513789	782200	592107	465750	748702	468364	586613	601855	515245	623541	571332	644553	646134	806321	590661
NEG	M139T294	139.027	294.265	141939	185698	177524	236164	157288	140448	151362	133303	165516	148971	163339	158850	236999	295505	157380	222201	131857	132319	138377	137868	148205	130793	139929	190664	153263	135173	144426	195289	172979	162349	200193	169915	243523	155737	119262	231323	134011	154905	178907	127594	193222	132963	168232	221924	222234	159927
NEG	M139T246	139.027	245.959	18906.4	16517.4	19798.2	21674.8	18620.5	17747.6	18250.9	18657.1	17563.1	13661.2	16515.9	14417.6	24069.5	26281.4	17101.7	17468.2	13929.6	14294.1	14282.6	12367.4	14105.4	13276.5	16968.4	14773.4	15009.8	12117.7	14529.5	21130.3	15608.9	16447.7	11385.1	13693.4	19240.6	14962.8	14612.6	23285.7	13619.4	15161.2	17136.3	12048.6	16829.9	14657.3	17348	14338.1	21602.8	15531.8
NEG	M139T312	139.027	312.416	44497.8	60704.5	58435.3	74379.9	50932.2	55993.7	55770.3	46327.9	47178.6	50256.8	59079.3	57944.4	59532.9	78130.1	47345.8	69900.3	46703.1	44742.2	49727	42903.1	58417.2	50828.2	54140.2	52446.8	50928.7	51109.6	44670	56562.6	54413	52890.1	53542.2	51076.4	74478.3	52611.4	46565.5	70862.5	42994.8	55432.1	56971.5	40036.9	55506.3	50503.5	57161.9	66111.6	74598.4	59161.5
NEG	M139T342	139.027	341.781	14655.2	10476.1	16598.1	12940.5	12956.3	16039.5	10661.9	8015.77	19656.7	8171.56	10949.4	8752.15	19838	16274.6	17483	22933.1	14007.8	7134.27	9233.54	8514.65	11971.8	10933	11085.7	14244	12886.5	14926.4	9983.53	14347.5	16032.4	12450.4	18009.6	15102.3	16512.5	9728.12	9572.85	20529.5	13387.8	21340	12373.6	14366.6	10218.3	9975.66	17346.9	13829.2	16136.1	13336.9
NEG	M139T365	139.027	365.118	26577.9	13720.1	12375.7	14917	26093.8	11106.7	12910.9	26804.3	28832.4	20870	26438.9	26235.7	33684	46212	28517.4	37973.2	11133	22023.2	10297.3	21276.5	24353	19068.6	27880	14460.4	29824.8	18293.7	25371.3	36501	32397	30594.4	21569.4	23150	23370	24750.4	26437.7	17752.5	22140.3	131085	31165.1	19677.7	32086.7	10645.8	18383.8	16899.4	39651.7	33319.7
NEG	M139T103	139.04	102.86	82848.2	154939	208435	1.19166e+06	260639	404460	485364	292873	246682	283778	782514	201294	99394.3	2.56003e+06	132963	443004	385424	229130	217095	190064	224224	120108	101432	605127	448982	247346	64504.4	350540	125636	165469	768235	190358	297613	206278	114071	460911	79814	126951	197522	199980	99245.4	153027	142685	249761	957067	360446
NEG	M139T68	139.04	67.6775	11221.6	21566.3	33964.8	46721	31698.4	27438.1	11133.8	16766.3	34531.2	54274.3	10690.9	24799.8	24376.2	85646.3	22386	45980.7	10967.9	23068.1	49519.6	34034.9	27550.5	24404.4	24296.9	37009.3	29386.4	30709.2	21866.2	27340.8	34147.4	30842	26333.1	25703.3	28926.2	42633.9	32060.4	37442.3	37677.9	29244	33340.8	36768	31254.8	19086.9	30899.4	41619.6	77523	51069.5
NEG	M139T22	139.049	22.4385	12753.6	277618	4402.93	43351.4	14688	6327.78	6815.92	5130.48	8697.65	2674.83	19251	795.903	41353.9	47208.9	9538.75	3633.02	8985.52	9010.41	3996.83	8719.82	8439.7	10472.8	20220	6174.84	65581.2	15085.5	12715.8	1382.48	23586.9	6688.41	21680.4	6962.04	7144.65	10842.9	8165.14	8709.99	76951.8	59947.9	6389.12	5892.69	84792.5	8199.19	4688.41	16073.9	55579.6	18206.6
NEG	M139T287	139.052	287.172	2604.96	1252.71	4318.14	7514.5	4710.05	105300	3412.42	100691	10304.7	10501.9	2429.75	1632.19	2358.37	4477.8	1115.1	4082.64	2906.42	1768.49	1522.13	2764.33	3765.69	6358.91	1753.63	11264.2	1799.65	1359.4	95857.7	5107.88	2231.42	10864.7	4936.3	1782.73	171738	89354.3	74433.6	149531	74334.8	3881.16	2875.47	2856.02	1165.61	4280.94	133738	5169.8	3789.45	2673.02
NEG	M139T122	139.052	121.91	30916.2	13902.1	28393.7	7217.69	17372.6	32491.9	29330.7	7044.09	26582.6	3594.33	52432.4	10177.9	21767.1	144203	12865.3	32930.6	30991.4	16164.2	16212	16068.6	121585	12352.1	12546.9	20096.6	35037.1	7882.62	9006.21	20123.4	9627.37	12101.1	107691	21387.7	23495.6	26605.9	38466.1	30036.5	14689	17368.9	18375.5	14676.5	29644.4	28410.3	22277.8	38779.1	30666.6	44650.8
NEG	M139T298	139.071	298.352	964.084	653.261	790.787	873.554	644.787	653.978	1299.3	760.384	1167.1	767.755	336.611	1132.16	636.574	711.579	790.276	729.705	723.834	911.516	590.175	541.79	704.048	918.743	771.785	672.746	392.509	625.568	523.202	904.527	551.978	726.598	438.184	653.559	1008.72	1808.62	903.198	656.124	859.347	869.592	610.897	623.186	1070.74	847.98	913.135	1483.19	1046.09	1180.43
NEG	M139T74	139.077	74.49	23135.4	24487.6	34473.8	24861.8	14582.2	12463.9	27329.3	33430.4	38235.6	16020.6	17659.4	33520.2	21909	24554.6	19172.3	29447.1	23246.3	19246.2	12352.2	21014.9	17932.9	22043.1	16060	45563.8	19568.7	22126.8	28197.2	38154.6	21541.8	32398.9	29000.1	41798.4	28901.9	19749.6	20180.3	33255.7	26016.2	19001.8	36336.2	24070.8	39322	14202.7	33312.3	23533.6	23143.2	23150.8
NEG	M139T317	139.096	317.499	538.881	426.025	1226.25	550.692	851.478	940.2	551.473	750.616	716.891	371.868	640.058	502.879	599.024	459.526	645.667	475.738	443.573	537.947	458.635	392.269	400.401	394.809	505.057	529.66	417.492	433.506	553.987	469.396	420.654	600.211	648.583	631.846	297.059	414.482	541.872	572.058	494.071	449.349	623.52	525.698	428.963	455.586	675.139	971.606	520.576	391.677
NEG	M139T46	139.113	45.697	8996.25	10783.8	12926.3	10436.1	9228.68	35797.2	22781.7	15709.6	24915.5	16137.9	15203.8	11354.4	16303.1	29846.8	18523.3	25863.6	35322.6	9385.45	8850.25	13672.8	9232.45	13114.4	12800.5	16558.4	17961.8	9072.49	16556.4	5713.96	10294.6	11950.3	14439.3	11954	11573.7	35448.2	11578.4	12057.5	18298	10537	24776.4	15101.3	12612.9	7783.43	16218.4	16663.6	11454.5	7133.83
NEG	M140T332	139.976	332.413	20027	6906.93	16802.1	16019.7	13925.7	16763.4	16082.9	15840.7	14554.1	12090.3	16467.5	16677.7	14944.1	17804.1	17798.4	20082.6	15924.7	14786.4	14580.4	17701.1	15566	15777	17793.7	19230.7	15887.2	14166.5	17074.6	20747.5	18566.7	20923.8	15032.3	14436.2	6238.76	16325.8	17596.3	21333.5	16270.3	17074.2	15963.3	18821.1	20133.8	15522.4	21374.6	21068.3	16002.1	15424.3
NEG	M140T190	139.985	189.607	14248.7	26968.8	18367.2	21546.4	35757.3	10830.5	14196.3	22183	21452.2	10574.8	20528	29495.9	35623	62290	44343.6	43253.8	34155.3	24730.5	18144.3	21044.1	23049.6	39288.2	54422.7	17053.4	20048.7	15522.1	17923.5	17569.8	33795.7	16847.5	28795.7	27740.3	9361.98	27497.5	41836.8	42144.1	20142.9	25781.9	28224	19167.4	27679.2	39500.1	32609.4	19497.7	39469.7	19595.8
NEG	M140T246	140.011	245.944	12759.6	12797.5	14657.8	21265.5	15212.6	16475.3	16930.5	17785.5	15326.5	15400.6	15914.6	13629.9	26082.5	30381.3	15295.3	18277.2	13813.6	15085.4	15404.6	11357.8	11953.2	12843.4	16292.6	17343.1	14150.3	13425.3	16195	21823	15795.7	17263.6	9565.91	13486.5	19109.4	15448.8	13505.9	21258.1	12481	13947.6	15279.7	12244.9	16633.5	16065.5	15122.6	15845.9	21600.3	15986.7
NEG	M140T174	140.01	174.309	12092.5	4930.48	14941.7	14754.7	4381.63	6014.66	6306.58	8789.87	13398	8106.18	7680.73	6922.67	9751.05	15952.2	6516.27	7655.07	6146.2	5744.86	2895.96	5053.45	8371.71	5333.53	8536.42	13817.8	7162.98	6072.81	3092.93	5807.18	5631.3	5381.08	4868.76	4615.17	3536.83	13438.5	11616	7368.7	8819.04	9338.2	6726.5	3752.49	15518	8851.02	16301.9	21681	17731.9	11809
NEG	M140T474	140.012	474.174	3956.72	2932.56	4230.42	3916.99	5478.8	3170.88	3970.49	5149.08	5913.47	1669.65	7527.67	5964.59	9344.35	9892.02	9554.62	9150.45	8978.73	5659.2	5510.93	6777.23	5387.43	6126.57	9067.01	6561.68	5330.55	5198.6	7266.24	8529.55	10040.7	8940.29	4043.24	4350.74	2522	8236.02	8599.55	10593	6004.16	7546.69	8134.58	5627.13	5872.49	5752.01	8745.29	7583.95	5889.3	5232.31
NEG	M140T117	140.01	117.043	26491.7	30718.3	37125.9	28442.3	26978	20854.7	28639.4	39602.5	46174.6	27008.7	86282.4	15730.3	39985.8	52638.5	28487.7	22942.4	30771.5	24119.1	12166.9	15699.9	68926.6	49715.7	21431.4	17632.9	62890	10909.3	16914.7	25446.6	29880.2	17221.7	26751.8	14495.1	13710.3	25540.2	33062	14377.6	20510.1	25411.6	19316.4	49267.5	31952.9	25780.3	30010.9	31476.3	29115.5	22075.8
NEG	M140T272	140.03	272.397	21773.7	26012.9	24808.3	28796.2	24187.2	23815.1	25076	25324.3	27362.3	22693.3	23788.3	22973.1	26928.2	33635.5	23684.1	24867.4	21077.9	23133.6	24811.6	20882.6	25425.2	25119.1	24679.8	26796.9	24385.1	23750.3	24814.4	29659.2	24828.6	25915.7	25935.5	20572.4	30497.1	23846.7	19548.6	29192.9	19275.8	25092.6	25029.8	20114.5	23924.6	23901	27111.3	25429.3	32958.1	24671.8
NEG	M140T125	140.036	125.327	39698.4	16846	13624.6	46596.6	54809.2	32350	39414.7	23845	16154.8	24360	46984.9	58408.7	47577.4	46610.2	39547.6	70621.5	45818.9	20351.4	26829.7	39370.4	57855.4	34483.3	51370.3	47519.6	36301.3	45290.8	41823.2	24635.9	52224.6	37261.7	54137.3	69047.6	9871.08	59341.9	72908.8	88730.8	45565.5	100354	39421.9	37460	65847.9	42478.3	41899	67571.3	37483.7	46437.7
NEG	M140T144	140.036	143.766	27827.9	4201.31	9475.36	33306.7	41048.2	24544.6	27056.7	8197.04	13420	6669.43	28593.5	37581.4	33661.7	30039.2	24317.3	40531.2	30124.9	13466.9	20603.6	26707.6	18243.8	24430.6	35801.6	35427.5	23537.3	29420.5	28260.8	18462.6	33449.3	24870	18019.7	42112	3669.14	36635.4	46437.9	58961.5	29752.5	65586.9	21922.4	28102.3	35916.3	28092.5	27837.4	25750.9	27470.3	32956.6
NEG	M140T344	140.033	343.914	2745.83	2492.54	3209.73	14092.2	2198.69	11450.3	12929	1604.98	2528.4	4330.02	2655.52	2793.17	2505.08	3408.71	2475.26	3490.72	2231.58	2500.32	1756.33	2453.65	13408.5	1988.05	2309.79	15405.1	3225.85	12088.3	2440.46	16138.2	2239.29	15509.4	2235.26	2155.13	3228.93	2137.04	1734.7	2017.01	12583.3	3230.8	2118.53	1776.05	3371.61	1901.91	2930.46	1729.66	14039.9	3030.25
NEG	M140T103	140.044	103.017	4679.54	13011.8	18237	94703.5	26065.4	33698.4	41303.6	22492.5	22088.8	22559.9	63481.2	16825.1	6822.63	188830	9948.93	33842	29313.5	21786.4	17769.6	17269	18734.4	9873.03	5017.58	49226.3	39139.5	19392.8	4307.78	26527.4	11129	14782.5	60762.8	17231.1	26036.3	17361.1	7817.39	41179.3	8272.14	9868.04	17043.5	16879.9	8535.81	13263	11461.6	21893.8	83240.6	27051
NEG	M140T193	140.047	192.884	18705.1	29550.4	21135.2	9180.35	40755	10305.1	2181.23	25288.9	24678.6	13027.6	24629.1	4012.14	40603.2	70806.9	49919.4	49138.2	2046.92	5480.82	19618.2	3520.31	22770.5	3310.3	2502.47	20454.4	23424.9	17486.4	20930.8	21088.2	14562.1	21568.4	3388.95	30935.4	10705.1	4918.94	1563.44	48549.8	26881.6	31524	30832.5	21771.6	28660.6	37377.6	4048.31	22979.5	6901.1	2736.93
NEG	M140T289	140.083	289.052	1322.91	641.054	5506.32	1451.55	3345.78	1456.81	2027.88	6022.27	8880.34	1130.89	1027.99	1078.9	4708.14	2093.51	14277.9	3480.49	2130.22	8350.65	978.178	689.287	1282.6	1058.39	4833.47	1727.12	1175.43	1927.37	1535.87	1351.6	3057.78	3601.21	1335.22	1796.78	1303.71	2234.4	2462.82	2221.62	1160.39	1501.37	1442.42	792.167	2643.18	2278.67	3918.96	4581.57	2072.06	1903.27
NEG	M140T295	140.109	295.3	7230.96	4438.86	31536.2	7869.67	11936.6	13928.2	13151.2	16562.2	12484.6	3363.67	12410.8	10339.4	21315.9	6283.05	13844.9	12440.4	8237.28	7651.26	9545.66	8864	9381.29	3779.77	9111.09	10861	8889.75	7990.97	9562.44	12734	8814.22	10526.7	15493.7	10632.6	2356.19	4041.04	8412.53	13711	4249.93	6999.94	13377.6	7384.94	14259.5	7684.15	15681.5	20175.3	13509.8	4383.19
NEG	M141T352_1	140.59	351.728	58747.6	50009.8	57572.4	61893.8	59353.8	53237.2	55128	44350.4	63768.6	56835.8	46771.9	60927.7	74352.2	83733.1	68639.6	66302.7	59880	57819.8	58922.4	59267.8	56712.3	52763.4	53306.9	58267.3	61665.6	57803.1	47030.5	61340.3	57574	62104.9	53035.6	57105.3	54346.1	58749.7	58750.6	68280.3	63764.6	58560.9	49897.3	55145.8	70547.1	20859.5	59306.1	57834.2	59627.9	63996.1
NEG	M141T54	140.919	54.256	69352.4	31924.1	76692	57910.8	56304.8	39321.2	61025.2	49806.5	49220.6	13957.4	30330.2	41921.3	43414.3	60385.5	47388	46713.4	36405.2	35795.8	16567.7	30088.2	5522.71	23356	29616.1	29032.8	30534.4	22714.2	21668.3	36986.3	42422.5	43603	38682.1	38235.8	31565.5	42093.5	49652.4	54363.3	52376.9	27039.8	45747.6	27188	30693.4	34843.9	41407.1	42267.2	59898.3	41691.9
NEG	M141T342	140.94	341.928	589.696	380.698	564.564	578.995	572.283	726.724	615.671	728.048	689.755	567.774	653.997	547.827	688.287	825.732	764.174	422.497	661.421	573.239	1020.09	590.577	953.81	451.11	666.415	639.39	597.73	570.646	654.167	586.581	548.588	860.462	628.319	670.284	425.832	794.579	605.898	751.047	515.073	568.292	584.844	501.517	1034.88	696.889	606.2	563.642	606.526	595.633
NEG	M141T186	140.976	185.971	11468.9	22396.5	16320.7	15391.3	23167.4	15769	17145.6	18263.9	18423.7	17221	15180.1	17947.8	22616.9	12609.1	16381.6	18724.3	14012.3	17594.2	17206.8	15410.9	15155.3	18704.3	11038.8	16426.5	19803.1	16614.8	16906.7	16775	9387.6	17903.3	15052.5	21748	18688.9	16467.9	15532.9	19241.9	13184.8	20221.3	16793.9	16074.4	16045.2	16337.1	17126.3	15861.9	16785.3	15419.6
NEG	M141T40	140.968	39.85	5215.66	7607.59	3667.9	2483.83	1914.92	3181.39	9591.68	3542.85	8992.46	2334.84	4317.64	5209.11	6884.78	2666.08	3380.4	9410.74	2785.47	3996.28	8537.04	8126.25	3150.15	5505.85	3415.32	13191.5	4552.44	2843.8	4283.68	4593.05	3885.66	21460.5	5717.46	10464.8	6912.82	5166.04	4117.08	10537.4	4549.15	4290.49	6275.92	3854.7	6486.05	8658.47	9655.33	4882.4	4768.61	4543.68
NEG	M141T58	140.987	58.02	14208.1	210822	16213	18657.2	21546.4	12670.5	16711.8	26665.9	21348.3	16296.4	36879.8	26681.5	21792.7	28963.9	17994.4	16373.3	18175.8	31111.5	21628.8	64803.8	21722.8	24807	27956.1	53168.2	24672.7	20720.7	23540.7	23196.7	25371.1	43136.9	21975.3	33595.5	17359.1	23596.9	23496.4	24564	16507.9	42870.2	24912.5	20277.7	26426.6	31019.1	26243.9	24908.6	27280.4	35235.5
NEG	M141T352_2	141.018	352.013	2.51882e+07	2.35993e+07	2.50045e+07	2.68243e+07	2.60038e+07	2.4451e+07	2.66533e+07	2.72133e+07	2.89025e+07	2.33448e+07	2.55094e+07	2.47771e+07	3.11142e+07	3.81418e+07	3.2385e+07	2.90037e+07	2.4317e+07	2.43181e+07	2.46178e+07	2.40361e+07	2.51626e+07	2.10833e+07	2.53675e+07	2.57118e+07	2.5553e+07	2.4385e+07	2.45921e+07	2.96459e+07	2.53883e+07	2.82545e+07	2.50547e+07	2.41496e+07	2.60537e+07	2.39204e+07	3.07622e+07	3.34093e+07	2.34959e+07	2.55565e+07	2.60953e+07	2.41718e+07	3.30414e+07	2.54741e+07	2.74034e+07	2.67705e+07	2.88745e+07	2.9997e+07
NEG	M141T290	141.017	290.101	67954.3	69614.7	62298.6	86179.8	101027	68056.2	83616.9	76624.1	78656	65965.6	86674.5	78724.6	77008.1	88733.4	73602.8	79961.9	78750.2	84702.6	76765.1	125574	140797	91894.3	72955.2	87412.4	87587.2	72933.5	77768.8	93922	93121.6	105194	74904.8	76776.3	91255.8	85126.4	88172.5	119465	110327	87919.3	94063.3	83493.3	73758.8	73160	85313.4	82620.6	69620.7	88572.4
NEG	M141T22	141.029	21.5315	161533	12603.8	107801	68836.6	6569.08	38297.4	83872.8	4144.61	161621	33733.8	22969.3	35396.9	59194.2	30033.4	6856.33	13429.1	10087.8	10562.6	9254.2	15366.6	38255.4	21949.9	31967	107039	18553.1	50879	11681	10974.8	27542.6	4301.63	4072.73	21440.4	19220.5	4804.83	322168	14269.1	52847	65336.8	994.627	16718.2	125385	103948	133930	256710	149062	173742
NEG	M141T310	141.031	310.185	3079.64	5236.99	1753.87	4810.43	870.38	1223.9	2397.29	1454.03	5756.07	1452.74	969.427	1925.38	1713.31	2123.78	6408.97	1688.63	4539.98	4149.4	1087.61	1662.13	1134.98	1309.89	1278.98	2082.45	1532.92	809.423	3994.6	5205.63	1727.38	5162.53	3770.39	1205.88	4632.2	2607.49	6524.57	1255.79	2094.78	2431.7	1115.22	5715.4	2213.02	2515.49	2469.71	4456.76	2493.24	3148.84
NEG	M141T242	141.04	241.886	1307.89	434.664	1210.83	1641.13	956.649	945.059	1785.35	589.87	1076.44	777.103	2407.6	1460.15	17888.4	1592.54	1047.79	2278.48	921.984	527.24	1046.55	2462.7	1331.77	21538.4	1250.11	2839	996.374	858.013	1616.03	4257.65	1079.89	2919.55	2175.14	1328	1658.79	2296.23	1727.39	1983.84	1939.56	3051.3	1910.41	1808.95	1252.64	969.655	1449.62	2541.9	2196.43	1836.49
NEG	M141T392	141.042	392.061	929.296	1126.69	872.125	2290.84	1274.8	1168.87	691.825	1374.02	1182.84	1214.01	857.092	1019.11	2162.16	2201.09	2056.84	1319.15	995.61	963.35	1070.67	696.916	1432.22	27271.6	746.822	1629.34	954.252	666.872	731.19	1035.17	844.79	836.101	868.189	2489.96	2374.93	904.312	740.242	1202.86	991.495	1100.87	1472.11	723.522	1496.9	880.916	1288.23	1980.9	1121.39	1046.11
NEG	M141T125	141.039	125.482	6122.21	9060.09	7484.92	1720.85	1896.71	5900.16	4811.71	7962.17	8376.07	6120.59	1077.32	2257.16	7363.54	8816.79	1310.77	8448.31	1605.6	7011.44	5919.3	657.515	2043.28	6330.9	1822.65	7670.11	686.4	1783.42	1585.63	7562.57	1719.25	1041.44	1823.23	3235.75	7357.77	1771.14	3037.51	3164.32	1932.7	2611.55	1601.9	6062.36	7089.16	1141.99	7786.27	2566.87	8244.23	1604.36
NEG	M141T103	141.046	102.556	11983.2	14403.9	15488.7	11888.8	2199.51	11922.8	15124.4	4696.93	24130.4	11433.5	7025.99	16661.1	337.172	18376.2	1293.06	8182.14	2710.13	1379.49	2394.75	20634.3	80531	18396.8	25676.8	6693.01	2872.99	15279.4	16363.8	20760.5	26308.6	24499	5566.68	15429.2	18314.8	17926.8	23598.3	24177.6	17771.3	30609.8	18187.7	7426.8	16894.1	12680.5	21627.6	19185.5	10948	18049.6
NEG	M141T369	141.043	368.695	23.8363	4311.99	3512.74	7250.83	208.148	56.7533	5477.13	49.0722	5161.43	68.9374	63.8292	6574.14	8011.56	57.4011	7607.07	6980.58	5271.35	101.572	185.165	6040.72	5629.71	0	3147.11	6769.83	5596.94	65.902	0	88.4861	82.5982	7305.36	5562.12	8818.69	89.8348	6059.7	89.5413	8771.86	6588.55	3335.37	6049.37	12352.8	113.195	90.374	64.9768	30.4597	7155.32	4760.29
NEG	M141T311	141.056	310.808	2189.24	2043.7	4983.22	2660.26	8862.34	4375.37	2530.1	4427.75	2702.61	1719.46	2807.49	5723.12	4340.89	2267.49	3759.57	4206.15	2905.66	2256.52	4725.44	2763.18	6630.99	1991.58	1968.55	6040.98	3683.5	3149.07	2776.07	4637.69	2673.49	2786.86	2829.83	2411.21	1905.73	2433.7	2001.58	3271.69	2025.35	2732.85	1945	3105.32	4978.14	2597.68	3424.24	5764.23	2729.62	2233.36
NEG	M141T367	141.067	366.724	11259	10560.2	11482.6	11702.7	11534.3	8142.46	11202.9	11278.6	10721.2	12163.1	12224.7	10068.1	6945.72	6736.81	9095.35	11578	10713.9	8675.1	9885.22	10126.2	10943.7	9277.78	11383.9	8053.81	11519.4	12178.1	6981.13	10029.4	10963.5	9677.55	16663.7	9234.96	8841.61	10602	10215.6	8735.27	8440.3	8042.81	15682.2	8002.99	10647.1	8063.7	11051.7	8906.71	8734.87	13098.9
NEG	M141T286	141.067	286.289	5200.47	24347.3	7449.06	5238.78	4584.99	5704.87	6556.3	3863.18	5394.87	4823.81	3099.9	5110.35	4533.11	7979.07	6210.77	5177.32	5233.41	3876.88	3688.07	4316.78	4316.24	2965.93	4938.64	4053.53	3430.92	2133.14	3633.58	3998.15	3565.74	3445.06	3534.15	4829.24	19711.2	4851.6	7172.8	6170.45	4385.52	3883.38	5514.15	3387.45	3321.35	5480.57	6257.7	4860.46	6500.19	5142.23
NEG	M141T68	141.092	68.0295	81184.4	94839.4	178407	174793	59330.2	179823	445721	165513	198412	135719	209272	418719	339377	222043	162743	105160	313575	73686.4	80287.2	108986	61483.1	73044.3	197507	420654	135633	107060	150572	148621	223163	155356	112601	281873	199297	210992	157000	152745	110337	132890	104678	103891	135704	79066.3	229469	154084	155944	168466
NEG	M141T194	141.092	194.085	6876.48	7626.6	8986.44	12801.3	3833.24	12419.3	12621.8	8434.28	8589.53	7391.55	15103.5	10726.9	7061.35	4753.35	5488.03	6423.63	9345.19	4615.58	8225.24	5439.22	15069.1	6537.26	11688.9	15294	11485	6928.44	7025.66	6909.88	8487.44	7629.21	15466.6	8048.48	12286.6	7842.55	5703.11	5897.73	10902.1	10375.7	12668.5	6722.43	7396.69	5853.74	10363.1	17217.7	9521.04	8769.63
NEG	M141T295	141.112	295.406	343.952	21251.9	1206.38	338.813	741.149	891.382	701.049	925.453	938.44	615.062	725.296	805.224	943.054	1072.44	1163.47	756.317	555.615	763.495	689.908	452.954	532.43	2877.62	432.575	694.931	1060.7	419.045	855.564	675.355	513.906	706.273	1117.15	779.848	16419.1	1576.17	1011.76	1023.78	836.717	1015.12	738.355	750.857	1864.9	719.724	1140.2	1422.66	754.568	444.66
NEG	M141T46	141.129	46.2935	2030.9	4072.2	5101.38	17564.8	1720.19	4713.22	4127.44	2682.24	8451.43	7313.94	5527.44	44224.3	8992.42	8769.11	3862.17	4879.13	6232.94	3418.62	1444.14	8820.63	120941	3797.49	3926.62	15002.7	33023	5215.09	7093.21	25239.5	4569.73	5232.14	57727.1	6574.02	4993.06	12959.1	1673.33	5934.8	7271.12	4993.17	4320.7	6060.05	2966.75	3637.86	45598.6	148686	23902.8	21020.4
NEG	M142T352_1	141.589	351.753	3987.54	7655.26	4476.85	5504.11	2678.68	2931.13	4724.91	5054.97	6663.3	5270.85	7405.53	1992.04	6294.31	11427.8	7772.67	3874.02	5722.53	5455.71	3665.9	3649.3	4524.86	5356.25	7017.54	7471.2	2222.21	4254.86	5068.41	9456.16	6800.66	3309.05	4430.81	8868.33	4832.55	4894.1	5655.75	10543.1	6078.31	2348.66	5368.39	2882.79	3053.04	4997.91	6456.35	8044.17	8648.34	3628.38
NEG	M142T351	141.696	351.055	3852.76	1584.1	2330.3	2563.81	4885.28	4642.15	2504.1	4952.18	3698.03	2142.35	1769.24	1623.91	2867.79	6435.6	5982.36	5723.47	4267.87	3254.1	4360.62	5094.48	4455.37	3962.97	4453.46	2304.83	4920.85	2077.33	1966.01	5543.14	1935.66	1630.67	4443.63	1953.49	4692.5	4661.81	5746.77	5655.71	5066.65	4073.78	2132.42	4550.47	5600.15	5202.39	1576.09	819.308	3406.6	1557.59
NEG	M142T350	141.757	350.259	2506.73	5504.91	3628.75	3948.35	2200.08	5542.38	6324.02	1402.87	6022.46	7658.83	6891.1	3836.84	7779.86	3904.25	6030.45	6858.73	3643.36	2733.17	3155.92	6946.03	7095.21	1751.02	2616.64	6699.3	2322.68	4641.01	6157.17	6421.86	1561.33	4666.89	5246.15	1975.98	7201.45	5629.26	3402.68	2098.51	1871.18	3277.99	4499.25	5820.22	2683.44	3051.42	6003.85	2405.52	3658.84	3460.46
NEG	M142T667	141.924	666.545	3315.92	11513	7812.33	4372.6	8212.9	4921.35	13030	5653.28	7072.76	3825.18	5017.38	9043.12	6897.11	6727.04	7863.57	7039.5	13826.2	6403.55	6985.52	12148.6	7498.83	4680.83	15761.9	1108.92	7684.78	5798.67	10084.2	5370	7997.52	10663.4	1231.87	7692.14	1461.21	4094.77	7139.23	6267.66	3210.03	7029.25	8082.64	10223	12503.5	5421.6	5997.46	854.372	7096.51	14293.5
NEG	M142T704	141.924	703.607	8560.79	18434.8	12328.7	4101.07	8426.74	8408.36	9065.48	2381.72	12643.6	12215	9081.94	10041.3	11135	3929.98	8645.25	11977	15241.8	9130.16	13578.8	6203.74	9683.19	6485.37	20581.6	12125	9072.6	7240.85	9990.54	8640.98	14903.9	8923.15	10261.7	11542.5	8413.59	9941.22	11207.5	12480.1	10265.1	12248.7	8295.78	18305.3	9945.36	14662.1	18921.1	10968.8	9240.85	13756
NEG	M142T642	141.924	642.174	27487.8	2561.87	8414.82	11364.7	7519.72	15257.4	11504.9	10170.7	7565.78	5849.02	12579.2	6433.7	1328.37	1816.2	7047.88	2858.57	5479.29	6859.3	2574.88	13424.5	12179.4	5485.63	5194.67	9597.73	991.382	17022.1	6898.9	8277.76	9848.48	3501.19	9139.44	6452.94	10634.4	1385.39	8030.23	7778.07	7204.4	16174.8	8810.11	1802.17	10941.4	6114.45	9471.11	7115.07	8946.13	9163.59
NEG	M142T684	141.924	684.022	10030.4	12726.7	14030.5	10274.1	16286.9	11508.9	13495.6	11656.3	13015.3	8340.59	18047.7	10871.6	19253.6	3841.16	28578.8	14271.5	10917.2	10441.6	20781.5	11686.6	15965.9	11904.4	26552.5	2185.35	10259.3	11235	12414.7	13003	22212.9	13168.2	13894.1	10690.3	10417.6	9078.74	13832.5	14299.8	19699.6	13123.3	14036.6	11494.3	13365	10521.1	10814.2	15519.1	13925.3	8333.41
NEG	M142T16	141.924	16.019	8043.75	10172.9	11713.1	7265.36	8631.33	9234.23	11893.4	18036.4	12313.1	9196.76	6798.8	9865.72	9895.38	11134.4	13494	12226.6	15241.8	9164.82	8937.78	11445.1	3798.36	11258.9	11585	12405.5	13078.9	8675.78	10480.1	21612.1	6494.33	12463.9	11884	10128.8	12472.7	10733.8	14303.4	14207.1	11723.2	6954.35	13008.6	9838.38	10886.4	4520.17	12230.5	14110.1	12804.8	10265.7
NEG	M142T4	141.924	4.362	14123.5	14658.1	16067.7	14573.2	16434.1	15267	17128.3	14047.2	17948	15263.7	14891.7	15205.6	14195.4	16414.4	16181.1	15723.6	14457.4	15698.8	12857.5	14177	4984.48	13503.6	16958.1	15161.8	13922.8	16249.5	15511.5	11909	18973	16283.2	16355.7	11453.4	16133.8	14202.3	14911	15370.1	16067.8	15674.9	17714.8	16303.1	17331.4	12555.3	15643.3	16456.5	15088.6	15637.8
[truncated: 23,099 more rows]
[truncated: 20 more columns]
