# Supplementary material for: Proteomic and metabolomic profiling of acupuncture for migraine reveals a correlative link via energy metabolism
Source: Front Neurosci. 2022 Sep 29;16:1013328. doi: 10.3389/fnins.2022.1013328 (PMC9557737; doi:10.3389/fnins.2022.1013328)
Supplement: Supplementary file 12 [file Table_4.XLSX]

## Sheet: Table S4
polarity	peak_name	mz	rt	H1	H2	H3	H4	H5	H6	H7	H8	H9	H10	M1	M2	M3	M4	M5	M6	M7	M8	M9	M10	M11	M12	M13	M14	M15	M16	M17	M18	M19	M20	A1	A2	A3	A4	A5	A6	A7	A8	A9	A10	A11	A12	A13	A14	A15	A16
POS	M60T617	60.0429	616.799	27844.3	29089.4	41138.2	21800.4	39988.3	28509.9	27560.7	36477.6	34726.2	27777.9	37221.5	24104.2	33505.1	37998.9	25832.5	55914.3	15684.6	33786.9	6186.27	34827.5	41291.3	6927.21	27263.8	30503.2	45296.4	35618.7	32113.7	32839.8	44125.8	14316.3	44628.9	26440.8	37269.6	20505.9	7637.75	43820.1	30804.6	22678.6	16786.6	26417.2	32530.8	35753.6	29860.3	36231.1	41647.9	21683.2
POS	M60T673	60.0429	673.192	4524.6	3179.43	3610.52	3882.53	3772.36	2166.06	2890.84	2575.82	2803.97	4257.23	2626.86	3675.46	3111.58	3396.88	4256.36	3513.39	5505.66	3422.9	2256.89	1118.68	2966.62	797.849	4048.07	3225.88	3266.65	3180.3	3810.57	2855.83	3918.15	3217.94	4225.82	2861.08	3138.47	3489.75	2660.77	877.712	2418.37	4116.11	4691.91	3696.72	2037.85	3382.67	4112.57	4362.65	2553.72	2934.6
POS	M60T650	60.0429	650.22	11823.6	4020.53	5142.59	4301.38	6139.39	3741.22	4195.58	3149.06	3994.09	3222.42	3712.23	4581.38	4181.35	2711.52	3788.6	4272.09	6932.01	4026.56	3333.18	3865.8	3207.69	1030.8	4131.23	4081.53	2981.59	4027.38	4686.09	9562.23	4095.35	4033.64	4207.7	4462.15	5682.44	3861.29	3683.73	3818.44	3899.72	3933.58	4700.55	3140.65	3653.53	3179.9	4437.81	4047.22	6367.99	3971.28
POS	M60T703	60.0429	702.755	8599.18	4632.76	5054.16	3087.62	6343.96	2362.03	3562.95	2853.59	4280.27	6698.03	9390.11	3006.44	4477.56	5811.66	4678.29	5158.94	2704.14	4342.99	2974.74	6848.31	3598.07	3492.21	5302.15	6792.2	3256.66	4697.69	4678.05	4866.32	5160.17	2834	4700.5	2908.84	5348.42	613.995	5459.06	4375.11	5025.52	4336.46	5297.44	3647.69	2945.09	7223.57	5240.34	4819.13	11126.1	4399.74
POS	M60T360	60.043	359.854	1377.97	1324.75	1087.01	1603.85	519.759	1094.89	1049.57	1050.48	1437.01	1179.5	1339.5	553.209	1127.5	1910.54	900.377	1719.33	1164.54	1027.41	1145.54	1797.3	835.903	852.822	917.414	1093.79	1293.8	944.495	1112.3	1267.46	1216.85	978.463	1293.44	1230.2	2088.74	1498.93	1265.06	1457.18	940.57	1542.12	1424.99	1561.18	1241.87	1566.65	1675.85	959.865	1471.93	975.516
POS	M60T2	60.0429	2.033	3611.66	3049.6	6585.76	3649	6309.06	3083.75	3661.54	7185.67	3763.9	3375.2	4944.85	3855.97	3586.23	3862.72	3843.62	5230.53	3971.89	3118.78	3776.97	3428.89	4037.92	3822.19	4061.57	3978.3	3780.47	3722.02	3723.36	3971.61	3721.39	3718.6	2658.43	3650.46	2549.3	3404.75	2424.3	3923.18	6696.58	3973.06	3728.29	3841.27	4126.5	3574.28	3813.76	6572.94	3870.38	3900.76
POS	M60T19	60.0431	18.68	2072.79	3855.6	5945.73	2980.07	7209.14	3170.92	2505.55	7031.51	2179.93	2241.34	3830.6	2269.34	2315.03	4554.89	2654.08	5335.65	2474.36	5641.57	2294.89	5392.32	9514.35	2182.49	2389.98	8861.73	3563.8	2472.23	2893.19	5083.81	2278.76	2507.48	7203.49	1931.17	7994.37	4921.26	7138.95	2550.14	2794.71	2580.98	3670.78	4042.02	2626.66	2145.2	2608.7	10101	5507.13	2208.56
POS	M60T274	60.0543	273.774	4277.04	11255.4	16443	2475.08	15813.3	19980.8	2979.09	4567.83	2213.89	18538.9	20511.1	7092.06	3335.66	3762.32	2601.32	11226.1	42569.1	9759.82	13236.9	5499.74	4113.64	12816.3	13070.3	15036.8	15667.3	2606.56	5864.97	4415.5	1240.9	3286.03	2085.14	2669.97	17573.2	5245.62	5495.35	11691.5	14440.9	4059.92	15159.2	17472.7	6128.34	14907.6	1694.72	13493.7	3475.62	4376.92
POS	M60T339	60.0793	338.736	10200.3	12185.6	9905.93	12669.1	7187.55	9418.68	12784.3	8041.51	9973.17	13933.8	10212.2	6591.05	5560.26	10685.1	11716.5	13867.2	12919.9	6038.64	11318.5	10904.4	5989.36	13039.1	12705	9081.83	8394.26	9070.3	9834.15	11179.9	14325.7	9119.29	13183.4	9980.04	12320.2	9971.24	12871	16854.5	8229.92	11705.7	9685.87	11425.3	10112	10176	12134	11683.2	12690.4	10420.2
POS	M60T182	60.0794	182.428	1618.43	2220.1	816.112	7021.05	3359.26	1681.09	1797.55	2453.02	3607.96	6810.79	2875.75	3765.96	9356.92	2533.43	1689.73	6632.92	4430.02	2211.36	812.553	709.729	1395.07	2968.76	7171.53	2004.88	3879.15	264.827	3515.08	2155.73	1720.22	5590.53	3098.7	3761.4	4013.78	1947.74	1979.12	8146.62	2030.05	2947.31	809.756	1302.26	2631.62	3932.55	8799.46	2257.12	3248.78	472.087
POS	M61T267	61.0092	266.769	538.896	707.428	450.897	662.757	1170.26	481.745	475.102	795.751	337.414	441.938	724.934	1271.44	1403.42	835.441	559.456	1246.42	725.204	578.926	796.145	774.009	726.096	521.191	728.391	599.029	1018.98	509.834	677.851	871.097	1110.88	654.033	580.493	1066.86	1037.1	447.686	549.434	1368.56	350.668	961.335	728.605	435.772	1134.19	638.478	850.127	554.146	759.719	723.272
POS	M61T103	61.0383	103.458	279964	187956	295285	277414	260423	288935	315721	265626	295425	227696	286647	286789	329001	251222	262327	266161	260824	307957	206268	214901	262737	202852	244801	344465	219565	245847	219834	353069	224797	287415	263852	273336	263163	226162	235121	256968	266909	326579	229283	241588	288012	238647	310354	332050	275339	238879
POS	M62T351	61.9724	350.839	4121.76	2802.39	2592.98	4137.49	4168.66	4367.03	2767.16	4470.63	4759.78	3478.28	2373.47	3500.01	3614.64	5748.18	4717.43	2637.82	1899.47	2646.03	4079.22	3157.02	4217.83	2518.18	4689.9	3956.02	4397.02	3114.57	3022.74	4140.86	1198.78	4430.94	4280.18	4615.32	2169.87	4531.23	4799.31	4740.08	4083.53	4230.3	4194.8	4226.45	2011.25	2531.57	4261.93	2735.6	2404.76	3974.17
POS	M62T104	62.0415	103.565	3214.65	2735.51	3300.6	2961.09	3788.41	3956.97	3884.78	2060.46	2834.43	3142.89	2608.21	4409.48	3361.92	2854.43	3776.48	3576.54	3385.88	3367.26	2039.76	2969.6	3251.95	3154.03	2885.89	3932.62	2814.28	2692.5	1301.36	4523.47	2146.64	4564.96	1907	3564.5	3420.06	2186.56	1171.24	2270.04	2450.76	3996.13	1224.71	872.376	2711.87	2164.1	2755.17	4230.57	2785.8	2208.17
POS	M63T28	62.9355	28.245	2302.04	7118.89	913.707	937.572	113.625	1652.27	1368.24	720.796	2324.65	2832.08	398.47	492.771	750.615	494.262	1252.07	228.118	270.994	1434.35	156.447	50.062	113.111	111.537	261.98	790.226	179.218	723.123	114.583	66.8741	159	60.2858	150.863	269.66	95.7857	6636.57	1969.21	168.749	1878.46	630.374	78.3262	139.547	1589.82	5506.86	1884.5	2511.28	2468.11	2926.99
POS	M63T351	62.9804	351.423	76432.8	75287.1	82277.1	74255.1	85704.9	75029.7	81754.2	82273.5	80363.3	79240.3	76541.1	71846.1	91977.3	96038	80589.2	84417.7	80047.4	78160.2	79360.3	79919.6	79500.2	67511.4	80153.9	80188.8	76054.5	73339.3	79368.3	82960.2	78123.2	80933.5	80739.4	75185.5	84347.7	81296.2	81670	91929.1	74562	75179.9	82062.8	79494.9	92467.6	80593.5	82932.1	82331.6	84992.2	81457.5
POS	M64T57	63.9962	57.143	1028.14	698.179	909.57	693.838	1080.42	1047.6	1540.47	2791.73	1447.38	0	626.425	305.687	948.489	864.487	1249.33	806.848	595.096	1044.79	1268.46	1804.62	1388.51	1006.57	1091.16	2761.65	1143.8	583.577	937.249	903.577	1407.89	785.5	1514.42	151.67	1258.62	781.163	741.513	1028.03	3796.08	300.575	1517.65	575.92	1225.62	810.925	1203.37	1392.2	1103.83	1338.33
POS	M64T352	64.0143	351.962	3990.21	3023.76	3421.89	1988.4	3062.31	2559.19	3253.88	2173.04	3957.26	2813.23	1951.62	2758.14	2973.82	3890.82	3609.14	3034.11	3937.39	2291.89	2254.75	4285.5	3278.82	2568.27	3168.23	3257.37	2082.92	3263.8	3378.34	4064.96	2388.91	3486.22	3308.67	3049.11	3655.76	2672.1	4290.91	3754.33	3683.73	1431.93	3400.47	2385.98	4277.62	3167.66	3236.74	1607.38	3561.39	3364.24
POS	M65T28	64.9342	28.1895	837.483	161.825	361.088	337.363	42.6505	531.631	451.215	383.058	785.445	1108.87	201.507	228.165	246.36	142.701	29.0124	56.3037	108.68	74.8018	99.0446	26.2825	66.7591	46.4267	109.149	241.465	114.335	339.819	113.486	71.6348	82.88	61.5755	122.373	137.825	37.4981	2218.55	774.878	79.1051	603.422	153.185	65.1784	30.0015	501.141	1757.54	662.29	832.51	1010.95	814.869
POS	M65T257	65.0372	256.697	345.776	308.129	473.991	658.978	446.147	300.433	615.56	538.331	419.949	403.026	489.351	444.666	568.187	684.584	940.71	736.869	760.688	823.188	674.566	424.515	421.878	665.471	747.878	381.078	612.36	450.722	533.544	629.563	555.479	578.949	336.825	380.176	481.4	619.515	803.69	897.268	484.45	793.478	529.772	302.446	501.196	734.282	824.574	586.146	504.295	635.111
POS	M67T257_1	67.0401	256.909	361.073	262.018	418.62	380.178	287.075	276.284	453.101	435.472	352.871	321.219	608.333	275.199	265.003	569.446	776.231	850.33	419.28	523.977	452.47	326.545	341.028	417.598	467.001	270.484	340.625	322.566	388.548	574.977	423.702	466.121	412.134	230.441	325.326	788.002	555.588	1071.69	370.081	758.966	492.068	248.935	271.874	484.869	773.97	383.283	445.719	403.71
POS	M67T289	67.0399	288.882	847.019	260.235	294.548	2666.13	1070.44	1206.98	3170.81	1561.35	4929.78	2625.76	353.795	386.357	444.336	1845.2	313.359	1302.84	993.394	271.133	229.491	669.292	122.864	829.084	581.817	936.949	174.031	112.775	1466.29	205.807	594.255	911.644	456.534	739.974	1963.82	2568.65	399.464	418.523	847.667	589.276	195.579	1450.19	536.28	318.18	475.307	806.358	303.327	292.81
POS	M67T257_2	67.0526	256.802	2473.6	1280.81	3959.75	4014.41	2104.62	967.921	3224.47	2625.31	2358.36	1718.8	3587.45	2486.84	2221.04	5743.84	4650.65	5595.07	3664.85	3434.99	2365.35	1817.73	2306.16	3410.91	4222.25	1626.12	2967.41	2002.74	3606.07	5334.63	3573.97	3085.12	3479.34	2120.73	2011.27	4756.65	4464.2	5296.83	3156.34	5229.96	3808.59	1870.93	1905.1	3246.46	4318.76	2798.74	3645.81	3987.9
POS	M68T297	68.048	296.741	61145.2	61210.2	63527.6	64753.7	68900.5	72226.1	64745.3	61748.9	49767.5	67362.3	69761.5	75733.2	71030.2	72315.6	62244.7	94285.1	77431.8	62863.5	65232.7	61213.3	54180.9	51277.5	61752.5	70193.2	76402.4	60603.8	68277.1	55374.2	60424	54106.4	65180.3	82472.1	66316.7	55524.4	66198.1	78469.9	77986.3	74241.8	65014.7	63012	65021.8	64699.3	66115.8	74322.8	66024.6	67253.6
POS	M68T315	68.048	314.781	25359.5	23865.3	21037.8	23287.8	24930.3	23579.3	23135.1	20324.1	20564.1	23007.6	24808.1	27417.8	26330.2	26707.7	23977.8	33200.6	22882.6	20616.8	24135.3	23493.1	22304.5	19419.8	22877.3	24480.4	26724.9	17291.8	29295.1	23906	25046.6	23722.6	26139.3	27566.4	26070.6	21852.4	25187.2	28469.9	24217.5	26574	26899.6	26742.4	27291.1	21379.2	25057.6	27596.5	25586.6	28180.7
POS	M68T256	68.048	256.5	5093.47	2434.77	4579.37	5752.31	3599.17	2325.07	5928.73	5875.62	5215.53	3217.94	5804.38	3533.6	3410.27	4823.75	6114.13	7608.82	5477.57	9382.71	3658.55	3868.05	4939.34	4213.3	5628.08	3731.43	5208.86	3424.05	4674.38	7128.88	5772.9	5278.42	4542.38	3240.1	3846.19	7315.07	6409.52	6363.46	4805.5	8258.13	4758	3402.9	4272.63	5681.04	6635.67	5742.4	5897.82	5149.88
POS	M69T51	69.0435	51.1675	82364.3	56303.1	151821	168609	205799	129601	278054	79388	125092	98099.5	158011	196486	105261	126321	116855	165200	97921.6	125856	67257.3	194733	432325	96682.6	206758	232979	219357	101987	374712	354113	217850	261241	223664	233703	89300.4	173574	1.88352e+06	187583	86215.5	119721	185995	198755	124984	105480	113712	190042	209387	186395
POS	M69T297	69.0513	296.785	3038.88	2244.62	2598.04	2611.88	2255.73	3226.37	2660.13	2180.03	1708.11	2379.01	2181.05	2301.41	1777.56	2748.4	2221.4	3652.12	2841.38	1714.86	2259.69	2377.01	2231.6	1819.78	2093.72	2535.8	2128.58	2944.9	2719.57	1994.68	1922.13	1937.9	1798.92	1994.17	2102.82	2452.29	1556.91	3338.43	2568.78	3010.48	2265.84	2121.24	1686.26	1729.33	2100.3	2564.4	1992.71	1620.02
POS	M69T25	69.0521	25.2845	2290.83	2942.57	3238.02	3410.64	2785.59	2344.73	3156.97	3281.73	3754.81	883.503	3126.08	2923.28	3254.94	4257.26	4339.37	3799.76	2902.53	2874.3	2758.54	2972.7	3775.36	2979.91	3671.26	2613.76	3560.36	1974.69	2885.08	3002.53	3282.92	3519.14	3858.38	2255.33	3294.82	2814.32	3515.66	3669.86	2325.51	3684.9	3734.87	2825.12	3907.14	8168.32	3050.71	3352.87	2871.61	3233.97
POS	M69T257	69.0558	256.814	4063.61	3132.64	601.924	650.367	546.931	1804.6	522.252	518.103	1683.75	407.34	4445.2	7024.4	536.472	959.789	881.976	1250.31	779.598	761.235	5307.55	3399.72	378.246	664.68	852.3	3753.29	7546.88	2288.09	734.574	1284.16	601.508	588.582	860.728	357.238	7776.15	935.317	998.044	1159.37	3417.4	1528.26	593.235	315.219	606.749	692.119	992.815	463.9	740.69	3724.67
POS	M69T259	69.0683	258.961	13328	7069.44	19373.3	15242.9	14552.1	10460.4	9457.45	12497.3	5653.78	10328.8	14670.6	15399	13666.5	13040.8	10155.7	17676.9	9749.28	5477.89	10069.1	7555.86	11087.6	7324.25	12855	7596.36	17969.4	7349.43	8301.09	11460.1	12363.3	10401.5	13677.5	11408.4	14291.9	9889.36	8599.71	14363.6	7157.63	9679.67	11245.9	15059.4	13982.8	9431.24	14971.6	19560.7	18320.7	8004.52
POS	M70T297_1	69.8564	296.913	3615.88	3555.87	7282.52	4504.66	6105.66	5903.35	5561.17	5615.91	5602.5	7282.32	6240.23	6963.94	7113.18	8655.63	4421.83	9534.47	7598.72	6110.73	3355.05	5065.83	4719.17	4496.18	5356.92	4389.21	7223.31	6117.88	1485.98	5805.04	5280.92	6049.16	4065.02	8892.91	4795.19	5505.09	5134.85	8153.92	7136.09	7039.67	3521.53	5567.29	6102.21	3840.91	5549.55	7335.16	4184.49	6819.87
POS	M70T86	69.9907	86.125	4451.38	1609.58	7374.84	3660.53	3392.51	3326.5	6240.05	3346.57	10343.3	1253.74	2729.54	844.67	3634.81	4029.91	4021.4	4363	2555.51	1771.58	994.542	2812.61	2816.79	2586.08	2885.07	5797.01	1471.16	1437.2	1958.52	2204.78	4492.77	3133.56	3203.43	1964.25	3199.94	5291.04	6537.97	3470.06	2641.63	2289.27	1469.3	2182.14	5870.32	6810.24	7728.33	5593.13	9647.57	8730.58
POS	M70T361	70.0272	360.943	1904.34	1745.78	1793.44	2244.2	1742.92	1195.04	1798.3	1584.6	2087.96	1840.79	2376.72	2353.73	1873.34	2313.17	1521.36	2174.05	2109.77	1161.31	1706.51	1975.28	1876.97	1966.59	2359.39	1793.36	2546.44	1458.13	2055.43	1701.55	2125.78	1806.71	2289.04	1779.63	1977.97	1585.78	1717.36	1946.22	1381.21	1842.26	1850.45	1654.68	2398.15	1881.17	1823.21	1982.39	1847.16	1814.07
POS	M70T51	70.0464	51.148	1566.63	3371.08	2292.72	5142.78	5081	3674.43	8456.21	3237.41	3482.54	1022.88	7550.91	2869.16	3706.67	3592.62	3237.58	3289.41	3333.28	3892.02	1959.34	4873.14	9202.99	1822.93	6246.3	7572.08	7299.84	2940.75	9758.45	13083.2	4568.02	8662.18	5478.88	7282.52	1585.85	4664.59	48200.1	6625.79	2148.17	3893.36	4780.55	6106.78	4874.07	2840.97	3400.95	5210.96	3892.92	9405.14
POS	M70T297_2	70.0646	296.778	2.71245e+06	2.62854e+06	2.74624e+06	2.83789e+06	3.04415e+06	3.2489e+06	2.83295e+06	2.41979e+06	2.24858e+06	3.09792e+06	2.87376e+06	3.29633e+06	2.90071e+06	3.17179e+06	2.56291e+06	3.93444e+06	3.27196e+06	2.31255e+06	2.77539e+06	2.46125e+06	2.28729e+06	2.09346e+06	2.45872e+06	2.86907e+06	3.08289e+06	2.7839e+06	2.95654e+06	2.45151e+06	2.61464e+06	2.27497e+06	2.80866e+06	3.63345e+06	2.89726e+06	2.4323e+06	2.67861e+06	3.50971e+06	3.46882e+06	3.27726e+06	2.93865e+06	2.5141e+06	2.72843e+06	2.7375e+06	2.74772e+06	3.13854e+06	2.81077e+06	2.97351e+06
POS	M70T372	70.0635	372.039	57306.2	75161.1	62647.4	64443	69473.8	63518.1	73008	57846.2	49817.3	45277.4	57926.3	62508.6	61837.9	62457.3	51939.9	72394.3	61053.3	60353.2	49765.6	53107	53816.7	51851.9	53663	60940	69436.6	42313	68644.3	49161.1	61913.1	41931.7	55082.6	93040.8	64635.2	48508.4	55958.1	54536.2	49289.5	72431.1	61661.1	56933	62423.4	56396.2	63106	65501.6	63821.7	55533.6
POS	M70T250	70.0636	250.297	66496.6	56144.7	70261	60638.2	68899.3	60752.7	70883.7	82066.7	74481.3	71178.8	70886.8	67301.3	69275.2	44131.9	76143.1	71047.8	79689.7	64332.7	57742	78428.5	70485.7	77694.6	61960.9	76708.6	68172	53885.1	63190.8	63885	66118.6	65970.8	72339.2	63192.7	73705.3	72963.6	76230.1	71169.2	58016	74388.6	80801.8	66548.4	73877.3	68108.8	70351.7	75472.1	75396.9	75150.8
POS	M70T500	70.0635	499.52	60305.7	91881.2	71741.3	102250	99297.4	58091.5	57066.7	29918.8	56291.1	47984	68183.8	64657.1	91849	113477	78708.9	110499	58137.7	60883.5	45268.3	62984.1	56439.4	54363.9	70112.4	59410.3	82076	36721	71400	64832.7	70525.8	58958.9	58037.4	57897.4	117839	79976.7	83744.2	92361.7	46436	90188.3	86009.4	47712	130856	59703.4	93672.6	82908.8	79579	68521.8
POS	M70T26	70.0726	25.501	3075.53	3635.33	3623.65	3745.15	3641.85	3747.82	3947.07	3732.42	3690.68	2172.83	3855.42	3802.04	3576.91	4575.72	4406.13	4372.61	4116.25	4128.54	3724.09	3575.32	3801.72	4100.03	3723.64	2510.99	3362.51	3381.78	3322.87	4041.98	3290.5	3509.85	4221.48	3132.58	4350.83	3952.44	3380.8	3257.38	3463.21	4123.51	4070.54	3842.97	3756.24	3562.07	3382.81	3864.89	3348.26	3742.66
POS	M71T221	71.0586	220.915	134845	106354	122098	122476	62344.7	83091.4	118139	136232	85512.1	82910.3	134500	119758	132741	143712	129327	123883	161862	147644	137852	135498	133881	125353	142619	81401.4	86064.6	44558.5	123470	78464.9	124761	92786.9	95393.4	107073	147710	133886	136652	142663	89499.3	93098.8	86977.5	130907	134761	88816.5	134449	139848	135355	145521
POS	M71T297	71.0668	296.989	104258	96410.2	107428	112119	120135	123075	112449	119922	80888.9	111244	107657	125872	114967	118525	103956	157787	129933	107170	108187	110038	115070	145092	127195	110887	114401	98655.6	112601	94310.8	94244.7	88335.5	102300	138903	106515	128909	103629	132406	129704	123227	115102	103965	104656	110545	107189	122950	106537	116491
POS	M71T24	71.0679	24.0865	1721.94	1812.45	2190.9	2078.05	1909.37	1910.36	2177.43	1811.51	2447.05	2923.92	2047.79	2040.42	1657.16	2252.84	2794.42	2272.53	2011.39	2463.68	1544.25	2442.62	2263.47	1666.79	2144.73	2026.5	2089.42	1528.76	2154.98	999.905	1798.52	1901.18	2146.55	1546.41	1503.03	1679.23	2071.27	1908.92	1841.61	2006.19	2252.09	2452.86	1999.42	1379.72	1850.32	1664.26	1605.38	1321.02
POS	M71T254	71.0588	253.684	19843.8	12065.3	14995.8	19390.3	14148	21590.9	22360.9	19312.8	21092.6	15770.8	1109.11	16361.2	11340.4	13173.1	17619.7	17340.9	20648.4	18846.6	16687.1	21297.3	22058.7	20199.2	23050.3	20106.6	20098.9	14141	19442.7	19350.6	19105	18886	22767.2	14420	21014.8	20657.8	21030.8	17195.8	16967.5	22848.8	21398.9	991.842	19822.4	19389.1	18659.5	19880	20495.7	24031.1
POS	M71T191	71.0712	191.254	544.096	1993.11	1843.31	1519.15	1201.9	1091.71	1403.18	1384.74	542.523	1256.71	1454.33	1624.56	339.653	447.987	2261.78	1365.18	1718.75	1560.44	1306.18	2018.26	2163.54	3926.07	2514.82	304.637	1778.67	1223.92	1443.25	1528.94	2646.79	1843.29	1866.99	1662.36	2390.51	337.336	777.953	1631.9	321.915	2497.53	1721.5	1564.67	736.432	639.128	391.355	371.74	579.393	634.006
POS	M72T285_1	71.8658	284.803	1878.64	1764.19	3528.31	3349	2762.59	2014.01	2680.61	1950.71	2342.56	2392.36	2907.39	2630.9	2678.33	2188.15	2663.3	3529.94	2128.98	1864.26	2381.85	1877.82	2635.84	2209.8	2383.91	2316.64	2649.56	2209.79	2039.53	1378.51	2820.49	3070.78	2279	2270.17	1692.59	1612.79	2544.95	3145.97	2184.61	2279.58	2968.4	2252.28	2242.39	2146.06	3401.13	2691.15	2183.87	2035.06
POS	M72T426	71.9502	425.599	10079.6	8465.84	10312.8	14046.7	12408.7	11226	12903.2	10874.1	12411.4	13086.2	11092.6	11300.8	11920.7	13760.2	8960.45	9905.31	13774.4	10531.9	4740.89	8389.6	8311.18	9185.72	11842.5	9981.13	7354.57	7755.16	10800.7	10767.4	13204.7	9020.92	9829.56	12487.9	8204.72	13670.3	8388.08	7366.59	10689.3	9487.18	9546.39	10340.9	11345.8	10767.5	7730.39	9846.83	12551.8	10557.5
POS	M72T34	71.9886	33.958	22290.4	74183.1	22696.1	22394.4	37465.5	7622.88	10128.6	23897.2	20951.4	3875.4	11529.7	8947.21	85767.7	44102.9	99033.8	24333.8	42790.9	68936.7	9102.09	13026	14869.6	13723.9	15539.5	12605.4	14420.7	7370.63	11242.4	14858	17906.9	18740.9	16993.1	51920.3	13406.8	60699.2	17682	1071.44	6793.7	17992.3	57743	9195.78	13283.9	27178.6	27551.8	14134.8	21995.5	14008.2
POS	M72T40	72.043	40.476	573823	138471	642845	475728	491288	162904	163322	316080	499153	98125.5	48458.4	75052.9	145427	99310.7	159205	63717.1	56303.4	119241	36763.9	44610.3	56642.1	48576.5	55762.4	88645.3	49858.7	26841.2	37785.5	43343.7	76031.4	48633.3	78543.7	100245	48045.9	77223.6	70934.7	69532.4	211405	65895	70752.9	43330.3	54011.9	33284	62149.1	61993.6	81672.3	51524.4
POS	M72T15	72.0428	15.45	23542.8	22364.1	6112.79	22845.8	39965.9	10792.2	22471.1	23107	26957.8	16589.8	33484.5	20833.7	27973.8	26183.4	26890.5	36021	26103.3	18624.9	23402.9	17105.6	17302.5	15959.8	18142.5	13228	22697.5	10473	45367.8	24152.7	17164.1	16964.4	33617	16944.7	18452.3	15446.7	24651.2	28753.4	18534.8	54327.5	36121.2	12737.8	22131.5	10597.3	25936	15792.7	14624.5	37182.5
POS	M72T48	72.0792	47.637	20331.9	22275.2	37456.3	28497.7	25967.4	25937.5	32163.9	36433.2	32335.2	32610.4	46139.3	37084	34866.2	34340.2	32063.5	30828.5	40151.8	31633.8	46725.6	24429.1	22437.6	22836.4	24308.8	29754.5	32787.8	25640	19875.8	33979.1	33620	47869.4	49616.3	36888.3	30072.1	38610.4	33562.9	32496.7	25725.6	33424.5	34237.4	49879	45385	36234.2	40801.9	59336.9	25410.5	46701.7
POS	M72T285_2	72.0797	284.769	992477	894308	1.2676e+06	1.32213e+06	1.16906e+06	1.01849e+06	953400	989186	766076	871022	1.05158e+06	1.04711e+06	1.33134e+06	1.23093e+06	932671	1.28409e+06	771580	931883	1.06003e+06	797829	1.03098e+06	866488	962550	970597	1.07944e+06	765371	799418	1.05112e+06	972814	1.15955e+06	1.0512e+06	919183	1.1236e+06	851888	959582	1.15006e+06	795001	918023	1.10666e+06	1.10405e+06	1.25719e+06	901050	1.19582e+06	1.05358e+06	1.11352e+06	1.08152e+06
POS	M72T26	72.0884	25.631	7362.96	14045.5	17093.8	8294.48	9912.87	11636.3	8562.76	8218.57	10563.8	11844.8	5815.16	9623.03	9312.27	15540.2	9988.15	9987.37	13862.8	14127.7	13073.4	9245.67	9080.61	14722.1	8395.92	8187.99	14211	10040.1	9808.37	5591.82	7801.58	17598.1	16036.9	8268.63	8820.45	12903.8	8406.45	9560.42	7946.98	10323	18242	9767.94	16548.3	8324.83	9080.15	16852.8	8400.5	15674.2
POS	M73T34	72.9964	33.859	16347.1	2118.85	16050.2	14266.2	30512.4	5801.68	7904.05	15490.9	13028.4	2346.94	197.927	169.077	538.327	567.172	813.699	781.859	340.252	664.913	159.556	530.075	37.9152	113.42	68.3366	0	30.3152	177.9	66.9771	124.333	273.409	65.2971	97.3281	272.666	211.313	226.413	266.116	806.601	258.228	258.283	460.193	150.319	184.811	300.328	207.073	182.408	922.751	324.319
POS	M73T280	73.0268	280.123	4586.41	2659.96	2396.51	1603.37	4812.02	2421.35	3764.82	3181.48	2291.02	1293.54	3617.85	2205.62	2575.62	2533.92	3040.18	3618.71	3020.91	1745.23	3044.51	2681.88	3794.55	4246.51	2470.76	2061.35	3066.9	1352.41	1102.89	1691.09	2197.9	1935.45	3704.07	2021.86	5775.89	2429.4	3240.74	4232.29	2886.72	5293.01	5816.1	2580.11	3148.72	4894.18	2395.61	3051.79	2415.34	3147.43
POS	M73T40	73.046	39.858	14595	3149.86	17467.9	12712.5	12299.9	4509.61	4962.92	7891.65	13304.5	3232.08	253.201	1802.52	4769.19	2515.16	4509.46	2069.94	1819.98	3012.61	96.9146	405.733	323.154	52.2942	125.911	185.173	110.137	105.135	0	137.222	259.108	314.96	2385.05	2439.06	221.354	2619.84	2849.24	2584.59	6344.97	1093.73	2478.74	364.044	128.09	1356.9	1838.92	353.766	2806.48	695.136
POS	M73T26	73.0721	26.309	878.066	851.782	910.062	1052.93	938.207	659.803	2237.89	943.441	742.54	665.188	982.855	926.39	882.586	878.969	1000.25	1720.71	853.136	855.367	781.239	921.566	950.707	894.976	1047.88	671.608	1014.43	800.112	906.74	1530.58	952.462	592.496	1062.55	676.013	778.59	968.043	974.644	934.757	739.791	804.788	660.79	877.352	916.501	794.237	878.191	915.785	970.056	900.946
POS	M73T327	73.0745	327.221	1564.7	1483.37	1906.24	1377.1	1080.67	1223.22	1176.5	1400.74	1552.33	1418.69	1753.1	1204.46	737.042	1062.14	1416.64	860.112	1495.61	1129.22	1132.52	1605.85	1208.05	1454.06	1526.71	1167.05	1330.92	1387.33	1145.6	1070.84	1404.24	1246.95	1174.42	1078.89	1878.2	1449.23	1169.07	917.211	662.593	1430.93	1448.82	1266.84	1179.77	1194.63	935.372	1593.18	1088.76	1120.18
POS	M73T234	73.0744	233.941	25701.1	7696.36	14665.4	17868.6	8815.35	11902.6	11486.1	6930.1	11063.5	5369.46	4268	6206.13	5937	3905.91	4029.37	5643.94	5644.49	5661.97	3829.05	4424.53	3996.19	4571.91	4502.23	4484.86	4332.73	4352.48	3931.68	3816.83	3928.2	3738.58	3860.03	11493.7	3762.6	5918.58	6566.41	3491.97	7440.14	4352.55	5720.78	3949.05	3962.31	4304.56	18019.6	4441.79	5314.02	4687.23
POS	M73T216	73.0744	215.537	7961.26	2129.74	10598.1	5399.41	15351.4	19303.7	7613.4	12367.5	5490.4	2763.31	2172.02	3865.05	15657.3	8224.6	4728.46	4614.96	4278.53	3509.3	2199.9	2467.58	2446.84	2644.24	2462.91	2517.89	2220.26	2296.83	2248.73	2170.16	1960.28	2500.02	2678.53	3841.38	2136.1	3518.47	4487.07	5582.12	4560.83	2546.35	3897.84	2756.15	2041.02	4529.38	5742.48	2612.21	6016.93	2603.3
POS	M73T285	73.0828	284.799	39038.6	32654.5	51786.4	52250.2	46095.8	38180.3	37218.9	36862.5	31623.5	33828.3	40743.4	42415.4	49442.4	49909.6	40519.6	49394	28615.4	37374.4	41398.9	32918.8	41348.7	30125.5	38343.2	37647	43580.9	31191.6	32904.4	43785.5	38715.8	45973.4	39657.7	36671	47617.2	34607.5	39966	44403.7	31759.4	34611.9	43070.3	39643.4	49580.9	34887.8	50532.2	42495.2	48109	41810.8
POS	M74T25	73.8847	25.384	869.862	840.429	1454.25	1136.16	846.073	780.841	917.972	1010.88	851.903	1026.93	1039.23	1088.58	1059.74	1173.42	1181.72	853.506	1052.16	788.514	952.326	836.954	980.115	1176.7	663.396	1058.8	879.385	767.55	974.89	923.548	1076.34	900.644	991.67	486.86	984.437	827.717	1140.67	991.094	1069.6	932.076	574.906	1096.11	1414.18	970.205	984.113	989.721	677.237	958.352
POS	M74T240	74.0133	239.748	667.087	992.38	955.906	688.161	591.689	709.365	979.998	1001.91	650.885	740.159	427.317	785.823	1042.18	801.572	755.516	956.763	920.296	733.8	1215.64	723.729	805.467	654.854	916.265	672.305	626.373	596.49	1096.24	724.385	1012.51	723.465	926.611	478.375	1089.37	672.467	701.792	855.861	971.883	769.474	789.933	833.482	743.024	523.333	831.323	862.645	861.099	617.761
POS	M74T284	74.0219	284.215	7544.56	7373.79	6302.15	6472.45	8298.18	6240.98	8433.89	8409.9	7180.62	5362.37	7311.34	6561.74	10486.7	8311.86	7672.76	7144.74	7029.5	10128.2	8056.71	5998.72	6747.95	7337.39	7277.44	8642.27	7395.4	6192.21	7374.55	7063.56	6580.71	7831.68	7194.53	6504.31	8643.6	7484.61	8277.47	7237.86	7476.83	8700.39	8738.97	5972.4	7612.41	9421.74	7219.64	9939.88	7015.02	7592.93
POS	M74T337	74.0583	336.675	11179.4	17365	15358.2	18273.6	18837.4	10975.3	20532.4	16336.1	34428	11949.9	12237.8	7507.4	12787.2	10398.5	13896.6	19334.4	10442.3	8298.34	9290.34	15566.2	12085.8	16223.9	13632.1	11344.9	12516.6	8957	9269.56	9984.08	15728.2	11732	12092.7	11005.4	39597.2	12743.5	12608.9	9271.41	6819.7	8932.81	14298.6	11843.3	16087	11731.6	11412.2	12445.7	17557.2	10392.4
POS	M74T41	74.0587	40.94	51542	569525	54415.7	46397.8	50076	53058.4	680645	36156.2	60347.4	830695	690173	46070.5	44846.3	40492	45960	690981	783669	35073.7	759647	6325.04	30640.1	5354.43	28755.3	6762.56	31073.2	945003	726822	24609.2	23054	709550	728340	42946.1	646382	41158.3	48417.3	716069	47972.2	757361	34139.7	738681	720021	758467	27449.7	685671	48647.4	718275
POS	M74T285	74.086	284.714	2399.45	565.822	826.617	842.743	621.362	2285.89	1807.54	391.91	3461.35	2111.11	3337.8	495.018	801.127	2459.49	3987.11	895.805	407.774	3337.4	581.048	2288.12	2159.41	441.158	689.275	1902.16	2264.18	2077.41	556.401	2432.41	817.273	593.482	556.726	2796.33	567.11	907.568	552.299	1005.39	2132.95	2215.04	465.417	1774.32	820.894	2179.77	348.186	2396.48	477.521	732.452
POS	M74T702	74.0954	702.015	108654	126002	160699	45242.9	208771	242436	109565	192816	118300	112254	31838.5	241683	171126	149443	99104.5	173465	203700	168083	658587	141762	266751	222082	198862	168877	154980	148830	244197	164928	182888	166715	126475	143219	136542	141239	21115.7	308519	41007.8	184097	288052	117343	340713	201135	349145	167083	149280	112904
POS	M74T663	74.0954	662.516	155149	172701	464617	294132	264933	253479	477164	334876	356292	223930	221236	249020	36040.2	154073	223120	150198	159932	55408.4	504234	285651	262726	178412	137106	128803	326127	278814	276408	39818.3	157593	162009	134493	258452	219750	170574	149830	210353	278759	231910	113380	294041	141989	39612.9	332691	313539	274802	220321
POS	M74T620	74.0953	619.715	912360	904485	900505	908080	384311	1.04473e+06	801410	416364	901594	1.00019e+06	977035	874688	933033	986826	935039	16181.4	532678	416589	1.05042e+06	925953	470069	442977	427563	928091	439507	1.22636e+06	1.06147e+06	15056.9	924664	919496	890937	976370	899587	111946	916273	814973	17725.7	829948	475410	1.04923e+06	922030	133225	885279	921656	925991	868027
POS	M74T4	74.0953	3.888	412376	244468	425449	388078	444834	208284	421182	432824	436742	457281	188644	409304	436820	457163	427305	421968	460250	464957	455482	421892	387368	435132	440695	409790	431002	529780	439888	428251	392960	408592	421639	498003	428298	427695	445211	95404.9	473867	416622	428902	424535	364610	474990	415690	453000	425549	412525
POS	M74T119	74.0949	119.352	459008	421447	305476	470081	313501	39483.6	252802	343892	306313	405821	323611	786661	342448	219061	311385	299743	353598	355245	50726.4	311762	307623	447300	301695	66264.4	317542	765397	448880	313766	198095	271912	311420	225890	330762	343666	348889	48885.5	55745.3	343234	327276	325109	352386	356726	374953	463376	207407	303532
POS	M74T137	74.0949	137.225	76678.2	220628	178525	101786	146572	162449	137820	136891	139571	177521	117939	164352	188364	171354	150186	126846	148367	168425	148745	141276	143308	129150	155066	130562	104485	194835	150259	157771	133935	138286	137252	175710	139247	144753	173120	135848	163502	128823	117649	127676	138707	12932.7	38113.3	153127	143155	137020
POS	M74T94	74.0948	94.11	372700	422098	444848	1.01874e+06	472683	445065	455280	469297	485513	468299	872157	492240	1.17589e+06	270877	476360	443445	482345	45659.4	470527	452507	454000	563183	2.81737e+06	486509	429528	255974	329567	440676	1.00146e+06	455883	461583	398947	450571	451589	382792	420056	1.00879e+06	378845	420061	453919	486698	624982	585473	307758	302297	462614
POS	M74T47	74.0952	46.608	588709	851767	784495	798566	915318	933137	797365	877637	963738	883941	867061	444428	786782	972859	574695	951558	949871	886191	520523	869773	513838	479970	785924	887487	838519	716251	891091	472135	896087	859397	876727	615048	704968	808270	887112	526648	935998	610921	872637	622604	821982	681691	872329	844188	606496	996393
POS	M74T17	74.0954	16.6245	283138	520475	397623	412493	420730	520317	407515	413831	427610	280462	499843	433393	188587	445447	401446	393842	428421	427787	336039	428011	326143	329561	311074	131444	439764	496740	460235	407218	366966	388125	397889	486956	407639	421925	394855	444032	148307	323723	279576	325046	238131	327823	408377	374347	283856	413173
POS	M75T280	74.9883	280.296	887.59	738.354	575.726	431.892	980.654	559.193	890.839	408.978	569.853	431.107	717.198	668.585	776.357	641.147	537	750.491	759.015	677.073	566.179	717.179	858.145	1044.54	621.731	520.308	750.778	390.865	428.416	595.815	718.519	503.157	956.725	745.739	1258.32	640.557	589.794	1035.18	458.282	844.768	1135.81	685.464	960.248	1138.63	758.291	840.961	604.284	761.736
POS	M75T319	75.0537	319.303	2944.57	580.365	2992.8	3540.19	2905.81	1838.05	3521.73	2232.3	3941.67	2758	3700.74	2676.45	2197.97	3531.37	2197.81	3859.58	2677.62	2593.21	2416.44	3673.28	3421.56	2894.13	2894.51	731.774	3048.05	1903.93	2653.86	2639.47	2599.05	1867.33	2814.07	2299.57	4967.52	3830.67	3858.49	3148.32	2301.17	4374.94	2844.36	2764.22	3262.09	2996.35	2502.56	2802.92	3491.06	4915.63
POS	M75T695	75.098	695.132	19084.9	9314.18	7996.69	22947.2	9361.76	13906.1	7751.73	9731.65	8605.08	8955.7	9099.99	3774.35	9133.55	5944.91	12997.8	20408.4	9748.96	14878.4	8704.58	9381.41	7386.28	17289.7	7344.92	15118.9	7556.59	8372.13	9270.26	2272.46	7547.08	8702.74	11251.4	10518	7502.94	7774.4	9173.98	18248.4	10477.7	9552.8	9828.11	10941.4	10892.8	7621.47	20360.3	9092.25	10263.8	9205.9
POS	M75T715	75.098	714.596	10452	11018.7	10907.7	14534.1	12261.5	10342.6	9800.82	7395.12	6753.71	9020.99	10930.7	7643.12	8460.59	9842.33	10633.9	10729.8	8719.36	9958.68	7730.48	9831.56	11155.5	11585.4	20677.8	6763.27	3283.63	7803.5	11431.4	19450.3	9933.89	10601.4	7664.98	8640.62	10489.1	6897.21	10866.7	8822.49	10464	10283.7	8671.62	17415.3	15370.7	9300.35	10476.6	9279.16	6376.78	2428.71
POS	M75T656	75.098	655.868	1327.34	5922.41	7476.25	1601.16	7473.15	20564.1	7832.1	9552.67	5533.47	9503.01	7757.78	6396.11	6645.4	3327.19	9349.12	6941.96	7157.65	7459.23	9635.1	9802.51	6388.78	4074.33	10969.5	8942.07	7613.1	7956.2	7571.93	6170.92	6787.93	9624.26	1563.5	12449.8	7746.71	8079.07	7421.88	7445.56	8682.69	8414.74	7461.18	12358.3	8214.16	6716.81	1167.96	7260.47	1069.75	5849.43
POS	M75T620	75.0979	619.992	6541.24	8609.27	4651.18	759.721	12770.7	27469.6	7369.16	6345.79	7168.9	9000.53	7686.57	18900.9	964.292	7601.88	7503.9	8025.75	7617.78	7788.76	8442.29	716.86	8261.24	9478.08	7491.15	3808.62	843.145	42410.9	7891.52	58225.3	7325.74	7426.65	7863.66	40805.1	7888.98	8233.86	48138.5	23001.2	25786	40006.7	6253.12	945.264	6588.24	7485.53	27620.9	7318.05	57394.9	18841.3
POS	M75T634	75.098	633.984	6965.61	7287.99	6548.13	9276.89	7155.32	7177.42	7264.16	6549.24	6464.88	8089.36	6934.18	5595.04	6751.33	6699.33	6337.74	10039	7327.91	8047.86	7872.41	7260.54	6982.36	6986.32	6834.12	7010.64	6486.27	6890.43	6745.76	7475.95	5386.84	7675.61	7820.06	9337.09	7327.34	9428.45	7370.53	7257.31	7320.59	7587.9	7091.62	7415.06	9071.17	7313.59	6714.98	6770.04	7028.98	5706.89
POS	M75T25	75.1076	25.398	11805	11074.9	11461.8	10521.1	11452.6	13156.7	10795	12812.8	12376.5	10657.5	10147.6	11079.1	13079.8	13760.4	13037.2	10380.8	15277.4	12194.2	13868.8	12573.1	13945.7	13994	12760.6	10951.7	9769.51	14477.2	13722.7	10720.5	11857.2	10936.7	9124.98	12431.8	13953	10292.7	13019.5	11577.2	12764.8	11767.6	13618.2	14239.7	15826.2	10717.3	11018.4	10930.5	11215.5	13516.1
POS	M75T675	75.098	675.277	9857.11	10078	10134.5	9448.07	8153.32	11925.7	11056.5	9029.71	10046.7	7835.87	11065.6	11097.9	9855.86	11220.9	10793.3	8294.14	10169.6	8354.82	8733.08	9844.4	11461	7745.95	11105.3	6839.34	17212.9	11881.4	10093.5	10553.4	10521.1	10996.6	7654.99	11126.3	11290.6	13771.7	8740.33	8127.38	11491.6	10360.6	11474	11233.8	10003	15602.6	8166.3	8546.08	9210.54	10357
POS	M76T373	76.0375	372.868	6841.41	3128.39	8011.33	3571.99	11457	6737.6	6234.69	8250.71	15364	1581.38	9172.36	10239.3	7645.92	4300.36	14765.7	4985.14	8553.92	8378.17	5824.62	7329.28	3804.82	4354.95	4091.51	7068.83	6625.17	3613.84	8600.47	8878.7	6483.81	7378.28	5779.78	11405.8	2734.39	3798.73	6789.25	7593.13	4328.57	7708.63	7450.49	5768.76	8563	6957.54	5854.33	11322	8560	2780.37
POS	M76T316	76.0375	315.898	1162.5	905.127	773.431	1823.43	1232.89	962.597	1628.37	1279.1	1827.04	1869.16	2926.54	3155.04	1430.99	4314	2701.92	2507.22	2301.44	1740.97	1152.8	1592.19	1468.99	1259.57	1635.23	2749.36	3813.33	1397.43	1221.21	1811.33	2942.67	1098.03	1399.62	2311.93	2372.85	2001.91	2170.42	1322.08	946.201	1778.25	998.224	909.808	1982.49	1559.92	2039.14	1812.49	3570.02	2122.09
POS	M76T312	76.0741	311.663	74815.4	141983	26517.4	212528	23565.3	133989	184726	23996.3	56172.3	201608	44052	21300.3	1.30771e+06	121061	12560.5	9745.69	80106	82030.3	30407.1	16425	18142.1	101511	48965.7	29802.1	126656	14731	40362.2	19213	57856.1	17528.8	22166.9	23583.9	141638	55258.3	42639.9	15331.9	92022.7	35026.9	43089.1	61240.5	21272	68967.7	46915	115007	128291	86257.4
POS	M76T63	76.074	62.66	193.046	445.954	590.457	687.487	566.729	650.79	4136.97	883.518	1177.01	57.536	133403	554.282	1886.59	528.167	647.454	2597.38	293.181	321.92	55.6503	972.814	613.571	493.566	710.447	1825.27	590.27	1435.38	546.815	382.518	1820.83	1436.27	1084.25	221.292	486.661	403.058	435.121	1826.84	263.418	131.869	0	996.844	869.728	2238.89	1161	1549.81	998.429	1444.84
POS	M77T239	77.0004	239.367	1443.66	1738.33	1468.37	1798.18	1463.66	1021.64	954.022	1338.42	1155.7	32429.8	2353.3	1742.53	1842.98	1182.01	1255.59	1817.54	989.616	20151	25689	1273.08	1453.38	1074.84	1090.35	1333.82	1157.28	1142.29	971.605	1532.29	1694.88	902.913	1387.05	1610.17	1371.05	851.84	1583.55	1612.84	976.412	1418.01	1488.44	1033.85	1712.51	1251.01	1177.7	1505.17	1512.58	1552.13
POS	M77T280	77.0037	280.108	1448.15	801.452	4045.18	768.281	1492.39	827.554	1697.13	924.081	483.685	1173.18	1029.63	4374.02	541.611	1223.42	621.566	1354.29	889.742	3830.34	1185.16	844.983	1643	1264.78	899.602	2946.84	988.575	3115.29	4354.4	3083.94	644.962	3168.96	3903.58	764.141	2666.4	707.828	724.452	1216.85	546.855	1825.98	1814.33	815.712	1109.42	1582.47	1114.18	1377.12	727.644	891.41
POS	M77T240	77.0368	240.038	21005.2	27354.4	24648	27405.8	20856.5	23490.6	25138.2	19990.9	19621.6	32076.8	31212.9	31733.5	28424.5	25120	19038.5	31848.5	23116.5	20826.4	24618.1	19869.9	24953.2	18347.5	22521.1	25163.8	24134.9	19215.6	22567.9	23744.9	22866.7	21906.2	28018.7	22946	40410.4	20323	20923	24249.6	23285.2	22073.7	22741	22841.9	25042.4	20892.7	24064	24775.4	25047.1	24528.1
POS	M77T283	77.0368	282.753	4365.66	4417.82	5083.23	4960.59	5621.91	5676.23	4278.3	5102.42	4126.51	4244.66	4108.02	4918.84	6226.09	4605.56	3463.34	5387.38	4124.94	5391.89	5258.35	4554.78	3976.09	3550.69	4215.39	3904.34	3916.59	5306.35	5210.9	3656.44	4762.85	4632.48	4458.35	4733.44	6049.5	4296.25	3889.32	5190.64	5604.02	4058.4	4544.7	4974.3	6250.12	4648.05	4635.09	4553.18	4752.18	4959.95
POS	M77T187	77.0368	187.398	5146.27	1046.82	11555.3	4616.26	1476.8	1407.54	15137.5	4170.53	2973.48	1116.83	3488.89	1346.22	21942.3	4436.74	1892.81	1716.08	2035.71	2302.49	2392.31	2546.85	1201.56	1230.57	2489.42	4524.32	5867.98	2202.65	1484.06	2163.24	8052.78	2141.17	3479.38	1201	2542.15	9407.17	2011.38	2060.31	2554.63	3636.93	2003.82	2051.28	1955.28	1403.87	2859.35	3083.67	3115.27	1784.06
POS	M77T26	77.0467	25.754	848.698	1587.6	1103.33	1003.91	1089.85	808.768	6151.56	972.079	1223	1266.06	1086.7	974.556	668.33	1326.98	1240.33	1317.97	1165.99	1234.87	1026.13	852.518	1452.12	930.962	912.88	863.952	1123.96	690.584	1148.69	824.52	1135.45	1086.21	3845.86	633.594	985.188	822.995	865.382	1144.03	955.077	1408.28	1331.84	1011.79	1177.2	782.869	1396.5	904.139	997.491	885.297
POS	M77T312	77.0773	311.596	1883.18	5021.19	948.387	6822.05	693.355	4187.44	6074.43	689.343	1916.91	6420.75	1399.07	526.328	35700.4	4016.72	349.291	309.027	2405.17	2622.53	831.108	452.31	494.199	2912.79	1081.26	757.1	3848.05	562.615	1307.25	467.814	1595.37	488.756	748.381	567.682	4587.36	1691.11	1308.36	458.131	2999.22	967.41	1162.48	2251.61	837.003	2134.73	1194.97	3408.4	3570.97	2643.62
POS	M78T55	78.032	54.5515	3205.15	1691.03	4879.83	4379.88	8558.12	4514.31	4780.87	6916.77	5890.9	2668.23	16370.5	7242.24	20540	16798.4	21745	19160.4	15802.3	11620.9	9512.72	15826.8	13232.4	10528.8	19496.9	14418.2	10333.3	9058.56	16246.9	15096.8	21398.3	18153.7	11079.7	4473.27	481.142	11491.7	16171.9	25020.8	11490.4	13039.1	8184.99	12843.4	16964.6	14198.5	21520.2	14399.3	12695.2	10754.9
POS	M78T211	78.0321	210.641	3140.51	718.542	219.796	281.452	1136.04	1288.46	11001.5	263.985	335.358	237.81	284.174	440.144	1269.71	529.109	658.483	448.775	878.46	230.046	209.888	565.653	385.602	270.131	386.594	181.754	375.417	378.777	423.179	121.454	461.077	237.072	296.863	653.121	552.17	277.161	1576.26	309.87	317.734	718.611	149.578	537.957	136.162	371.255	323.175	1558.23	2807.22	395.616
POS	M78T240	78.0402	240.005	1224.21	1094.14	1568.9	1024.45	1571.68	914.35	1116.3	1194.09	1161.76	1658.4	2018.14	1351.12	1470.98	1289.38	1002.81	2002.94	946.174	1046.97	1341.3	1099.85	1208.77	791.408	1306.85	1082.51	1290.92	915.056	1268.84	890.673	1439.17	1292.21	1829.32	1054.91	2137.04	1367.47	955.114	1562.05	1346.91	879.463	1142.86	1352.1	1392.99	1152.75	1365.33	1610.72	1681.97	1411.24
POS	M79T346	78.9538	345.589	4673.3	1421.08	3830.61	4545.58	4416.08	4464.7	2305.36	3704.77	2804.61	3157.87	4294.36	4365.66	7038.97	6201.83	5226.47	4123.76	4200.92	3769.28	4488.56	2859.31	3884.85	2948.13	3470.13	4633.63	3498.8	4702.09	3720.58	4472.77	4672.92	3970.7	3966.86	4536.19	1827.77	4490.03	4612.15	4038.2	5951.53	4341.72	4077.69	5332.21	5563.79	4243.82	5904.34	5211.57	4198.24	4681.15
POS	M79T57	79.0194	56.7935	14613.5	10329.1	12531.3	8489.9	17752.5	13624.8	18473.7	31748.8	18630.9	5180.86	15071.9	8700.17	15501.1	10615.1	13102.9	10413.9	8974.95	14009.2	19551.4	20890.8	18916.7	14474.9	13790.9	31152	17054.2	15166.7	14421.7	13612	19981.8	13294.8	16350.3	10491	24876.5	17876.7	11611	12406.7	52531.9	10628.8	20923.1	11836.2	15315.6	11621.3	14973	24786.5	14800.8	15931
POS	M79T240	79.0525	240.015	20925.5	23726.8	22047.8	24216.8	20126.9	17271.8	20919	16067.1	16343.3	30505.5	24482.8	20491.1	22960.3	16974.5	15312.7	25277.9	17770.1	16261.6	20208	16617.7	18981.2	13993.3	18615.9	19485.9	21120.6	15816.2	18397.5	21023.4	19345.4	19294.8	23369.7	20007.1	31176.8	21293.9	16991.1	21106.3	21287.4	17496.7	20412.6	19602.9	22764.7	16894.9	19911.5	21166.4	18559.3	18090.8
POS	M79T26	79.0627	26.3695	834.811	11955.7	1398.23	728.304	902.263	883.418	1093.38	761.629	1049.83	983.738	1165.01	878.423	671.253	1072.5	1120.31	906.365	1010.73	1070.18	807.651	764.472	1088.79	913.22	1179.75	785.815	817.401	693.905	613.866	963.92	1084.11	1026.93	935.795	1013.98	883.789	1084.56	929.5	846.513	2803.93	1036.05	722.61	2324.47	1052.99	873.139	1151.67	776.446	923.013	628.882
POS	M80T54	80.0478	54.404	18386.4	15982.2	33178.5	28321	51340.9	74483.6	28077.8	38538.9	40146.2	22927.3	75155.1	48010.7	87753.9	100386	111369	97418.2	74270.2	51182.5	50344.5	68994	70521.7	62955.9	98890.9	62592.3	56562.7	45784	65647.7	70039.1	91459.8	85754.2	58973.5	33560	19050	58693.2	75376.9	120265	52668.6	66807.4	48287.5	56370.2	68076	63914.8	100383	71267.2	72724.4	62421.2
POS	M80T40	80.0477	39.5045	28453.8	26873.1	30022.3	28636	29906.4	26489.1	25261.1	28225.8	27999.4	18914.3	25287.6	24434.3	26989.4	27216.5	37209	34699.8	31260.8	31142.1	27053.6	27450.6	21876	28517.5	34850.4	19460	24777.6	24322.4	22940.9	27700.1	31634.2	37604.8	38530.6	25035.4	33973.5	26045.2	30870.3	34059.2	25516.3	27953.3	33630.7	27150.6	25634.4	24267.4	29374.2	23196.4	29529	26668.1
POS	M80T18	80.048	18.393	7085.07	8389.29	21308.3	8838.81	7916.85	5899.07	9244.45	7904.92	9752.31	6167.57	10061	19022.1	7059.55	11434.5	11420.7	11826.8	8102.82	8523.82	6704.78	8365.85	10976.6	9290.14	10028	7506.52	11777.3	6835.71	6612.09	10257.3	10544.2	10807.7	43705.6	7477.25	9147.77	8977.33	9069.89	11951.4	8307.78	8540.17	10756.4	8036.71	11964.1	6072.62	17149.6	9549.95	14266.2	9742.51
POS	M80T240	80.0559	239.546	349.696	391.438	499.289	690.518	572.549	365.117	377.734	351.254	421.818	752.87	327.533	1040.22	478.465	61.359	340.006	750.318	500.421	543.719	573.905	179.494	366.918	203.902	147.719	468.78	632.048	253.678	755.596	395.34	429.525	373.951	392.265	713.093	845.338	302.402	278.919	520.105	659.466	428.273	507.852	499.461	465.496	507.163	116.184	553.69	414.891	518.485
POS	M81T240	81.0316	240.026	1075.34	1479.83	3425.28	2183.94	2546.46	698.68	1174	2769.42	3928.28	1541.96	2341.44	2406.69	3088.99	1126.02	3046.6	1238.68	946.116	2196.6	692.779	1305.45	2487.57	939.314	1941.36	1051.05	2067.18	1826.51	1212.73	837.21	1651.16	1149.85	975.211	2394.15	1620.75	3667.85	1429.52	1334.46	1306.23	920.651	2308.65	837.942	2884.13	3338.72	3683.08	1328.15	883.543	880.754
POS	M81T302	81.0429	302.137	6244	15968.2	9051.84	6399.81	6350.24	6034.45	9010.22	5966.55	6419.27	5926.95	6848.18	17665.6	19975.7	2192.97	19394.4	17696.8	5569.18	5677.22	3329.63	5674.45	16832.5	6207.71	6276.49	7628.93	655.581	4383.52	6260.87	5375.65	19745.6	7086.78	6327.48	4097.27	6798.23	6132.93	7547.21	5157.34	7673.26	6125.8	16999.6	734.396	3071.81	6439.24	5871.95	7141.66	6440.13	6117.75
POS	M81T146	81.0429	146.212	53852.7	19722.7	36448.5	31061.1	23176	37533.6	31740	49101.8	32773	21338	21567.6	20697.6	28192.6	22917.5	25886.2	24535.9	22035.2	24540.1	20222.3	20832.3	20969.3	21227	20081.5	19890.8	20419.4	21880.5	18065.5	19257.4	24690.4	21900.9	23163.2	20683.9	26367.7	76970.5	27043.7	22629.8	26658.3	22044.8	21841.1	19492.6	33781.1	29287.2	30106.5	23710.8	30547.1	22708.9
POS	M81T53	81.0506	52.933	275.231	359.031	524.406	436.376	608.098	608.169	644.962	510.739	434.86	0	1775.86	480.405	1419.98	1252.12	1001.49	1744.3	2009.63	931.511	1015.69	1805.97	406.491	678.003	1712.01	578.217	701.684	749.073	1439.27	1582.66	1188.13	1280.96	1200.36	76.0946	439.805	1290.02	684.457	1686.74	279.38	857.52	685.862	1055.78	494.67	1316.6	1495.11	709.444	889.336	300.1
POS	M81T34	81.0682	33.8465	4749.27	2275.17	6341.71	6757.16	589.434	466.104	8153.81	7005.12	7298.14	6865.58	3722.47	584.06	8394.11	5165.1	6385.69	5264.33	5295.61	4979.9	3342.91	3657.52	662.251	4361.16	5827.57	416.666	5116.88	5511.03	459.926	3904.8	7017.16	3702.47	2220.09	472.757	843.544	3249.86	414.035	6385.82	478.138	4068.88	5947.53	5683.63	738.108	4529.82	4562.58	4000.82	9668.62	494.029
POS	M82T257	82.0632	256.997	3416.69	4447.41	3918.79	5404.96	6645.85	6760.51	5475.72	4591.6	4993.63	5728.77	5436.55	2929.79	6596.42	6650.37	7086.65	9469.15	5378.37	15831.2	6169.12	3562.16	3459.8	6122.09	5563.54	8717.97	4186.64	9668.47	9760.02	7116.17	4445.96	4657.88	4855.64	3181.3	3641.68	6819.47	6668.16	8256.56	4564.68	8092.39	4290.23	5640.83	6085.11	4982.32	9454.39	3779.99	5217.08	5354.14
POS	M82T49	82.0631	49.382	11223	5824.04	10811.3	10195.4	14161.3	10966.6	4092.33	8235.41	10542.7	6112.53	8732.1	1728.68	10953.2	10369.4	13535.9	10303.2	7846.49	2877.01	8929.13	11645.1	8521.91	8264.3	11334.2	20049.4	11887	7756.1	9696.42	14765.1	4253.19	8903.98	9826.92	10205.2	9469.9	10374.6	10690	10379	11733.4	8014.01	5957.07	7918.25	10331.3	13953.1	10934.8	18296.6	13607.5	13569.4
POS	M82T290	82.0632	289.514	16767.8	7317.84	6955.28	22868.1	19216.6	25019.6	51683.5	34033.2	72597.9	70385.8	15548.5	15504.3	11629.6	27526.6	7732.7	25303.3	22265.8	13915.6	6784.27	20451.8	2684.19	11164.9	10949.5	12764.1	7712.02	7816.26	25948	5426.15	13219.6	19538.5	12436.7	26791.8	23022.3	32387.9	10592	8105.79	18094.9	14700	4908.79	26944.9	5129.97	8361.81	17157	15764.4	4118.26	9241.96
POS	M82T25	82.0739	25.278	510.729	1622.6	1894.52	2405.04	2436.12	1890.35	2381.24	1673.06	1442.29	2266.5	1263.85	2071.6	669.354	1763.49	1881.32	1619.16	861.734	2039.16	679.09	2024.75	746.593	594.325	688.903	1720.26	1396.53	2681.43	679.658	1359.53	2268.4	1572.6	941.035	527.836	852.784	1534.87	606.069	1098.88	2386.66	1545.28	1594.39	1553.86	621.452	2063.17	771.208	617.819	1598.67	923.59
POS	M83T398	82.9959	397.861	2539.21	1175.23	2943.23	1940.07	1499.44	388.066	1654.38	1283.68	2188.93	2149.98	1911.98	1460.38	929.908	2276.69	2201.53	1553.83	1417.36	515.151	1620.3	1215.77	1797.06	2451.19	2227.53	1016.9	991.928	2375.96	411.32	2144.66	912.969	1139.55	1326.99	1452.09	1895.78	2152.28	638.052	2477.24	2502	520.234	674.122	1979.45	1984.4	659.081	2363.01	2891.85	334.897	2821.36
POS	M83T26	83.0191	25.5005	1976	1744.99	1875.2	1911.8	2048.92	1895.1	2195.06	1982.9	1899.86	2130.62	2180.82	1883.59	2055.53	2296.48	2126.7	2047.19	1857.37	1946.84	2027.17	1973.87	1863.43	1959.22	1897.37	1720.35	2213	1858.51	1705.17	2038.55	1835.44	1892.15	2040.66	1749	1840.93	2029.34	2012.59	1922.92	1631.03	1921.37	1877.68	1900.17	1940.67	1843.36	1815.79	2115.11	1697.82	1813.31
POS	M83T52	83.0474	51.54	2102.27	2813.79	2968.31	2526.73	3124.91	3081.72	2759.67	534.892	3324.55	779.98	1781.52	517.348	2009.32	1831.07	1847.67	1871.42	1515.29	1852.14	2138.66	2171.32	1893.47	1106.14	1918.58	1480.91	2057.07	456.713	2031.37	2090.61	1721.41	1995.21	1970.76	780.36	1103.88	1934.1	1844.63	1713.72	1581.28	1909.47	1445.24	981	1665.43	2255.41	1507.12	1285.67	1833.95	1857.03
POS	M83T342	83.0588	342.451	81688.6	60650.4	80657.8	126667	71082.1	124991	57360.3	95103.7	119599	74827.6	104267	91385.6	58521.2	97412.5	250419	76719.4	85892.5	105374	83885.2	169383	107772	118570	126951	116291	120212	55055.4	116155	88261.4	173406	108197	96535.7	82333.2	107842	120967	208200	128317	67776.8	198210	98358.3	104730	78780	79845.3	92405.1	124557	100540	87326.7
POS	M83T315	83.0587	314.62	38540	49192.1	55924.7	31729.4	24354.6	27644.1	67718.1	65673.8	57605.9	22732.5	60422.5	53786.4	62204.2	38080.1	40915.4	34925.7	26750.5	59001	31390.4	44514.1	58255	33672.5	54032.6	35103.3	36961.8	25731.7	42342.2	35628	69979.3	41109.1	47126.4	43789.3	58797.1	42859.4	40954.3	40218.3	26375.1	28154.3	54790.8	37611.6	48946.8	33584.9	76174	35973.1	63192.7	46094.4
POS	M83T362	83.0588	361.576	49038.3	57667.9	50069.4	56476.6	57622.2	41352.1	55692.6	50664.4	52640	60970.7	50689.9	67170.1	50011.8	106551	45284.7	51042.5	42182.7	44742.7	43350.4	48845.8	47506.7	45220.5	53002	45529.1	54256.6	41800.4	46761.6	49662.3	57015.9	832.904	47920.2	41972.4	935.276	53489.5	48920.3	46188.9	41844.7	51008.6	47787.2	50876	54126.6	46881.3	50080.7	48009.5	51390	50659.9
POS	M83T25	83.0692	25.341	4785.89	5454.07	6425.59	5238.39	5162.18	4000.34	6065.9	5175.21	6079	4050.11	6039.19	4716.59	5113.71	7054.89	13870.3	6330.49	5069.34	4842.09	4447.61	5830.77	6485.31	5933.1	6004.27	18914.1	5982.21	4019.75	4275.96	6350.84	6475.6	6014.06	6390.24	3729.14	5848.03	4803.79	5379.33	6768.51	4048.45	6123.02	15036.4	5088.26	6368	3912.77	5456.88	6328.39	5213.1	4560.94
POS	M83T46	83.0837	45.943	721.438	3149.61	3638.68	4374.33	730.095	1065.2	1096.92	2668.69	4405.17	2347.37	607.143	2228.47	480.843	3822.63	3346.88	3663.28	1693.86	516.969	2037.48	2180.48	2736.69	152.858	480.697	541.235	1477.93	2634.24	2062.46	2860.58	3876.7	3455.36	2952.95	1992.31	2797.28	3712.95	4081.17	3581.82	319.592	430.366	3881.98	2498.08	4717.69	298.369	1324.49	419.223	5490.44	594.539
POS	M84T257_1	83.8291	256.774	434.508	497.367	616.72	834.821	477.295	255.868	676.018	547.622	637.748	458.31	1173.8	489.436	513.039	1336.74	1201.18	763.353	816.443	867.302	499.024	558.044	452.968	901.841	779.762	391.012	795.164	554.415	746.453	1404.42	688.213	811.356	757.116	480.789	541.49	1140.58	1080.72	1195.29	759.787	1230.45	764.975	461.771	502.806	626.538	804.674	665.518	741.028	811.599
POS	M84T359	84.0429	359.29	186264	263541	182538	179703	194147	206323	209371	185107	192728	385684	208621	194920	155333	109267	161169	177108	211635	208671	255272	225134	219411	223419	216456	197044	226750	350943	210919	195029	198592	154428	217211	287958	231341	206808	196475	125832	245740	218202	203604	221666	177415	226641	184661	195972	162044	218277
POS	M84T377	84.0429	377.296	82873.3	113555	84398.1	97064.1	114341	103493	99217.5	107979	78473.9	114700	119773	129412	228596	149124	99353.2	115926	125811	150077	152011	127667	136496	147208	136278	103763	107713	120677	120237	109725	93027.9	103631	90281	156169	124413	97379.3	105594	135707	116638	135218	150646	97590.5	114241	147330	98133.5	115092	137107	146631
POS	M84T300	84.0427	299.73	25360.7	10031.6	15179	19283.1	10458.5	14509.7	17026.5	17237.5	22980.8	13633.5	13446.3	20366.9	14698.7	14098.9	11567.5	11771.2	11038.1	10350.6	13145.3	15264.4	15341.4	52527.3	16092	18565.4	15251.6	14203	8849.84	14594.5	16259.5	9658.02	9840.43	15221.9	13719.3	30678.2	23394.9	10958.5	13956.5	20433.6	13539.1	12900.3	24774.2	18125.1	21086.9	21377.1	22592.3	23016
POS	M84T25_1	84.0535	24.816	8256.82	9413.88	9469.29	11686.9	10097.5	8718.74	9318.26	9582.15	9808.31	10615.9	10120	9106.82	9661.48	11219.9	11817.5	9816.24	10368.2	11466.1	9774.19	9448.97	9894.83	10142.7	9472.55	7791.71	10901	9269.58	8498.1	10867.5	9246.13	9664.43	12050.2	7528.5	9607.71	9556.99	9053.15	9486.75	9090.41	10578	9976.03	10188.3	9301.68	8141.55	9088.74	9897.36	8783.55	8889.83
POS	M84T327	84.0663	327.496	4032	5385.8	4912.17	3927.21	2433.98	2306.66	3240.58	4906.18	5022.54	4056.42	4118.24	2799.69	1932.87	2864.13	3662.13	2791.85	3746.61	2816.62	2648.83	5048.82	3937.45	4710.8	4151.85	3121.63	3800.45	2768.25	3725.52	3199.9	3541.55	3312.59	4771.08	2522.29	6962.48	4738.87	4145.96	1774.92	2150.1	3811.77	4301.82	3247.7	3038.24	2493.84	3408.95	3023.3	3622.69	4135.31
POS	M84T343	84.062	342.731	2151.56	2992.08	3098.96	4059.87	2000.48	3249.11	2715.97	3771.75	504.868	3277.03	3425.99	4398.7	2359.55	4231.15	8614.33	2758.44	2365.78	4352.42	3182.88	5920.84	4546.69	4752.89	3939.6	5299.06	3098.18	1959.09	4146	4806.91	6675.57	3762.38	3955.8	2893.84	4360.79	3463.71	9442.5	4397.95	2732.71	7252.87	3926.06	3542.99	3080.73	3777	2333.36	4748.18	1684.78	2508.13
POS	M84T257_2	84.0798	257.36	233454	193477	321853	294516	170722	310229	320437	236115	201174	183062	294978	165565	175131	430063	439270	526833	323930	382811	234513	149506	170443	320392	304538	125433	267379	165672	348079	504641	239029	259954	268575	160433	146530	434212	380154	437864	200687	535384	233672	214906	195505	328259	462648	189285	304565	331086
POS	M84T293	84.079	292.959	70519.4	76391.4	88844.4	60527.1	65845	51359.3	53574.6	61732.2	68677.5	71169.9	53491.3	59827.9	85780.3	102061	78477.4	89688.7	56079.6	95702.1	206351	49288.9	45424.4	85171.3	61734	47288.6	63231.1	32803.9	55294.7	60275.9	80443.1	47465.6	49961.1	93514.3	70956.8	63022.6	88159.1	48589.8	77908.2	72688	81853.4	42544.8	196468	71610.6	108789	63051.8	52980.5	55482.6
POS	M84T507	84.079	506.723	89951.2	86661	96558.2	123460	98319.2	89362	85628.6	88163.3	80804.9	65586	93562.9	105101	159902	141082	87680.6	134430	77382	94367.3	86229.7	92273.9	89007.9	77626.2	83583.1	82687.7	95558.7	48319.3	78503	110790	104326	93318.7	86903.6	80006.9	116225	81696.3	83288.4	122714	75262.8	103910	103486	72261	159617	84678	159927	102784	107477	96175.5
POS	M84T119	84.079	119.485	61323.1	66328.1	65595.6	66688.5	59987.4	60187.3	62142.8	77830	56691.2	54459.5	71993.9	80207.5	72751.9	66211.1	66794.8	60329	79075.7	68681.2	57417	59919.2	57839.2	81576.3	71225.3	62609.6	62356.7	60128.4	59332.6	56303.7	60049.5	68928.2	66503.6	63070.2	82341.3	64288.7	67111.2	62359.8	61901	66027.9	65585.9	61738.4	84241.8	70377.1	62443	58772.8	64312.5	46554.4
POS	M84T25_2	84.0898	25.489	1790.32	1379.77	3643.82	986.601	1468.75	1360.17	1364.08	1000.1	1411.7	6345.06	1102.69	1717.39	2253.94	1368.06	1712.99	1554.31	1824.24	4863.24	1331.62	1434.82	1346.26	1240.73	1419.13	502.502	4559.65	1318.18	1538.22	5034.17	1360.67	1736.69	4589.74	1139.81	1182.91	1553.89	1368.95	1725.51	1654.2	1564.28	1721.44	1622.58	1494.5	1131.04	6215.8	1535.09	1315.24	1550.35
POS	M85T344	84.9091	343.888	13580.9	6252.02	13252.2	14925.5	13894.3	10920.8	14085.1	10562.8	12492.8	11876.7	10870.2	10484.6	13524.8	17507.8	13577.7	14482.9	13166.5	13681.2	12154.6	9996.45	10102.6	8935.82	11961.1	13646.9	12139.5	10840.4	8883.51	12628.2	12547.9	13007.9	10870.9	15306.2	7966.15	13951.5	13989.9	19454.8	17638.5	7836.63	11891.4	12167.3	12630.4	9836.97	16759.9	14727.4	16973.5	10277.1
POS	M85T349	84.9617	348.586	70489.4	71502	70815.7	68974.6	69952.5	39271.8	69686	80517.2	70937.7	64975.2	46445.5	77934.3	81385.4	85873.9	67998.3	72270.8	69457.8	72026.3	44720.7	69533.6	70967.3	71656.6	65645	74011.8	67005.1	63899.5	72502.9	72781.7	70083.7	72217.9	77783.4	69677.2	73381.9	67544.4	46165.3	68772.6	69980.9	72073.6	72964.4	69694.7	77466.2	40328.5	71768.3	73812	76694.8	74300
POS	M85T25	84.9741	25.464	1450.23	1635.57	1802.28	1778.92	1654.27	1680.51	1512.28	1683.52	1573	1595.05	2000.38	1740.8	1351.55	1722.91	1592.55	1700.49	1590.77	1831.95	1628.17	1747.05	1867.79	1359.39	1638.67	1334.19	1463.66	1651.22	1477.51	1764.39	1382.35	1628.77	1634.98	1302.28	1699.64	1455.99	1543.67	1640.05	1586.46	1452.42	1624.24	1526.16	1915.34	1353.38	1753.75	1614.4	1697.86	1551.51
POS	M85T192	85.0087	191.771	2244.52	1472	3007.57	1698.75	2987.62	279.188	2202.52	3268.72	2080.46	1907.57	680.44	935.785	435.255	920.417	2085.82	875.793	261.291	1639.28	644.874	1297.38	1009.33	1454.57	1223.9	1587.56	884.367	827.991	1171.89	1828.72	1923.95	1825.09	443.95	1981.92	1059.57	1896.6	905.746	1837.29	1804.1	1266.03	823.665	1231.83	777.153	2102.66	490.074	1789.12	2240.21	955.679
POS	M85T290	85.0264	290.287	117409	116299	91204.7	93107.5	149276	130964	151705	113656	112697	110746	111091	150625	178195	94726.7	101845	112052	199409	104800	129331	153298	154305	109462	130671	120123	114210	129806	187344	144944	113476	139504	111853	147923	98618.3	82312	113047	133704	82242.7	153280	109987	104959	118195	133016	122002	110715	98367	133684
POS	M85T339	85.0265	338.743	32538	22358.5	27736.4	26385.8	31373.3	26414.9	23933.3	25431.4	23213	33799.6	26028.1	28085.9	32786.5	27301.3	18639.4	31334.2	19195.1	24229.4	29178.5	29217.7	24000.8	27504.4	27536.2	24891.6	21729.9	26500.1	23921.9	24333.7	25537.6	19960.7	28536.5	23729.9	28299.3	25759.2	21029.3	20575.6	16557.1	25191.6	29637	22183	27453.5	26187	26706.1	24916	23608.2	25520
POS	M85T265	85.0264	264.609	5733.11	5639.53	6908.43	5263.25	6248.1	6106.5	3614.92	6798.62	2863.18	5300.33	7362.19	4667.45	6069.72	5744.23	4220.91	6685.86	4842.92	3719.64	6205.47	5058.83	5021.81	3894.67	4744.22	7161.35	6869.04	6457.61	4715.04	6255.95	4635.75	5083.2	6278.65	5957.79	4425.72	4787.34	4778.29	6939.27	5154.34	7104.15	6942.09	6436.86	6540.8	6266.48	6125.52	6362.24	6228.78	5913.48
POS	M85T359	85.0458	359.254	5678.73	7740.44	14378	6802.15	7108.35	6462.07	7840.69	7968.31	6385.55	11398	19769.2	6914.79	5106.92	3183.96	4918.28	6777.71	8016.3	7049.67	19226.6	16786.7	20172	7788.72	8176.83	7013.8	9800.56	11204.3	7664.6	5467.85	5334.83	4065.19	7616.56	18586.9	8287.97	8043.12	5893.06	17900.1	7113.21	6561.02	7426.23	7995.94	4121.7	7731.16	5120.31	5311.46	6165.91	5760.56
POS	M85T377	85.0458	377.177	3514.62	4756.61	4696.58	3055.31	5306.58	5193.65	3818.82	5117.3	4223.89	5266.39	4856.85	4216.83	7639.17	6294.69	2974.94	3805.04	4207.4	5882.04	7054.64	4352.94	5175.84	6285.97	5060.45	3691.01	4988.24	5048.17	5257.85	3121.93	5135.91	3118.62	3243.22	10127.4	4565.76	3451.23	5233.86	8550.5	4937.07	5259.33	7025.36	2958.82	4238.97	5004.07	4227.88	3945.88	5385.21	5696.98
POS	M85T209	85.0741	208.51	10136.1	22632.4	11161.3	11816.9	10478.7	7824.88	8205.01	12183	14249.5	9628.85	9096.89	9609.92	9614.93	10811.2	12674.1	10298.7	9023.62	6915.87	9572.98	10922.8	9565.16	11298.3	10712.7	7355.43	11330.1	6166.77	9156.66	7308.99	12133.7	8770.45	8213	9028.92	18790.1	11089.2	14593	9744.49	7926.71	12590.6	8542.83	9368.7	11991.6	10056.4	10675.5	9358.53	10659.1	13905.3
POS	M85T149	85.074	149.161	24137.6	72595.1	53690.4	34249.5	61141.5	29496.5	33344.8	54106.3	7886.23	14309	5068.11	5463.93	5699.84	5629.58	5389.12	390.967	6997.31	6381.27	5068.67	4924.09	4581.32	5881	4442.31	4150.08	5186.85	5409.83	5358.48	4890.53	5716.33	5441.53	5680.39	5719.48	5024.4	5853.28	5811.15	5501.78	5981.41	5240.54	4912.32	5675.48	4870.77	6128.56	6197.63	4998.78	6337.23	5505.59
POS	M85T257	85.0819	257.315	10589.6	6399.28	11726	12932.4	8421.53	5086.34	12386	10916.8	7069.99	6716.73	13860.7	7457.41	8645.51	20302.8	18384.7	23081.6	14703.4	26968.3	10345.4	7232.72	8102.62	14280.3	12507.3	6442.5	11577.4	7054.85	14833.1	21368.2	12556.7	11431.1	12173.3	6805.95	6451.46	18166.6	17034.8	19749.4	10747.7	24782.9	11251.6	6295.33	7686.68	11832	18690.2	8573.71	12947.3	13791.1
POS	M85T35	85.0741	35.1875	75446.6	4035.98	89628.4	68664.9	44225.5	93755	43069.8	54047.5	52905.3	20986.8	3832.62	21332.2	54287.9	35570.3	31560.9	27240.1	11954.2	18487.8	2863.29	3271.4	1784.42	3920.21	3447.19	4753.92	3737.89	3190.77	2419.57	2971.87	5345.17	2385.9	2115.58	14786.6	2069.08	29714.5	45307.6	26435	31147.5	4218.19	25681.3	511.391	4949.43	37896.8	48512.4	4159.23	48160.7	5068.67
POS	M85T506	85.0821	506.158	4689.77	4068.69	4243.98	6702.22	4794.03	3072.66	4464.38	271.81	4538.34	3526.93	4077.23	6858.1	6906.72	7716.03	2917.44	5554.6	3381.34	4566.18	4085.35	4322.31	3826.29	3976.26	5828.09	3175.47	3985.05	2867.61	2466.18	5016.09	4080.79	5769.72	3330.15	4017.82	4110.32	795.024	4433.84	5900.02	4334.68	459.137	4542.44	4207.75	8196.25	1295.62	8120.88	4787.79	5668.12	5891.58
POS	M85T293	85.0821	293.364	3268.4	3211.79	4790.75	2155.22	2137.77	2382.49	2540.95	2295.29	4920.83	2464.56	2018.46	2493.07	3079.22	3200.07	2808.11	3199.24	3686.77	5494.1	8894.84	1695.79	2133.68	3751.61	2843.34	2683.06	4136.2	1523.4	2626.17	2120.35	3026.22	2506.45	2678.14	2601.73	2245.96	2771.92	4654.39	3008.77	3663.32	2210.67	3929.94	1538.14	10403.5	3105.3	4401.85	583.674	2312.6	2243.91
POS	M85T121	85.0821	121.003	3437.15	630.115	3313.44	3253.51	3125.1	2434.31	2766.92	3059.91	2757.62	1006.34	1398.84	2608.26	3411.25	1657.05	1799.24	1132.65	3461.83	3441.91	930.641	2688.14	2786.86	848.865	2829.45	2588.63	3769.88	2086.33	1645.76	2677.96	794.47	2621.68	2252.91	2535.73	1401.51	865.303	2220.4	1159.27	1660.52	3788.74	1301.94	2142.92	2295.57	2209.91	3091.89	686.552	2974.52	2839.4
POS	M86T248_1	85.8388	247.809	1964.67	1812.51	3075.13	2494.26	2281.8	1331.88	1811.1	1837.57	1460.98	2106.01	2175.29	1629.74	2663.34	1106.77	1715.04	2944.24	1494.23	1663.27	1464.84	1896.31	2594.21	1485.65	2278.93	1179.84	1930.87	1366.28	1487.2	2145.92	2057.55	1960.57	1515.17	1860.63	1975.18	1782.13	2111.52	2247.41	1291.04	1785.8	1772.21	2136	2602.1	2270.73	1084.62	2157.78	1434.56	1627.69
POS	M86T290	86.0298	290.129	4643.83	1197.75	3688.98	2673.76	4884.04	3661.36	4407.06	2418.41	5665.28	5022.33	4309.58	4706.4	8478.18	1839.77	3866.35	2677.23	6184.99	3946.69	3693.57	3306.62	3272.4	3004.84	3098.1	4654.31	1429.37	3525.56	4740.24	5208.97	4907.72	3836.45	3004.15	5475.5	3602.11	3077.79	2799.22	5802.76	3296.74	4283.96	2483.83	2898.32	3283.93	5944.36	5303.48	4963.39	2120.84	3406.68
POS	M86T270	86.0581	269.961	6521.31	5482.47	8828.79	7365.93	10632	7754.93	15040.8	7437.72	10101.8	7882.28	7929.27	8573.44	10171.6	15219.4	12509.8	10931.2	3221.42	8973.01	11207.3	11089	10785.7	8865.63	8519.8	19420.4	11502.3	5217.57	8953.29	11380.9	9850.68	12882.3	7048.31	14139.6	7415.63	9193.35	11220.9	12021.4	8367.6	11747.7	7021.45	5782.27	12886	9909.04	10710.7	9581.8	11265.7	8074.7
POS	M86T114	86.0581	113.516	20054.4	15773.2	27628.7	32963.4	11403.1	39450	30952	34550.2	20619.9	28811.3	33428.7	28229.4	27185.3	34650.5	35022.8	28769.3	31013.9	25046.4	28970.7	16450.4	11251.1	19705.9	22132.7	23997.4	24376.2	28596.1	26126.1	31896.2	21904.3	34010.6	25628.6	24632.1	28107	27410.8	26692.7	19314.4	40106.2	62382.9	24009.2	15540.1	33339	14204.2	18711.7	20813.3	43311.4	36521.3
POS	M86T162	86.0696	162.111	78014.6	61641.7	79615.8	67674.1	82393.3	83358.4	78945.3	86277.4	79620.6	93415.1	80044.9	84147.5	102756	88248.2	88767.5	79209.8	79290.6	91742.2	83459.9	80301.7	80976	66870.5	73014.1	92784.4	94389.8	70718.4	89535	98180	81003.9	79666.2	77039.9	91533.9	86585.4	82225	81168.9	85318.4	99143	82745.4	75289.8	88897.2	86160.4	77581.7	89830.4	96194.2	103638	80924.7
POS	M86T327	86.0582	327.248	8162.57	12395.7	9819.62	19918.8	717.037	4696.66	8470.19	17497.5	6376.89	7275.13	6992.26	812.126	5553.22	13071.8	566.044	14122.7	19617.1	572.116	3198.95	725.594	684.137	724.553	1052.25	7362.32	6360.74	3935.94	433.56	7348.67	6272.31	8649.12	3914.93	3629.67	14388.9	673.492	5408.96	4447.03	402.047	27319	5791.94	3265.76	645.331	4425.34	5564.98	759.189	10652.5	18940.7
POS	M86T25_1	86.0693	24.694	1852.29	3118.03	2160.85	1287.63	1352.31	1068.44	1384.25	2294.64	4578	1078.37	1662.53	871.255	2345.15	2136.02	1401.75	1647.72	1562.3	1410.3	1082.03	1539.99	1799.86	1313.21	1809.52	1892.62	1455.97	1116.55	1188.31	1671.83	1317.95	1725.19	1375.63	1010.23	1481.82	2623.33	1035.95	5696.45	2469.24	1389.94	1314.6	1390.45	1847.74	1135.4	2285.44	1277.08	1024.23	4743.92
POS	M86T149	86.0771	148.621	3271.49	1814.8	1969.29	1168.42	2028.13	3574.85	1131.14	2405.63	2954.21	4129.73	4345.35	3974.62	2745.74	5474.41	3175.79	6175.04	5215.62	3203.15	3326.27	3249.18	3599.27	3285.34	3117.2	3994.79	3066.4	4398.93	2890.53	3639.85	3917.12	4982.01	4206.37	4407.09	3642.05	3961.19	3087.05	4992.62	5153.89	7774.34	4675.58	2986.68	3977.44	3563.59	3682.78	4545.46	4613.08	7116.98
POS	M86T248_2	86.0956	248.149	749856	512421	1.08014e+06	941149	872705	768925	649934	714994	525975	609588	736865	720773	921879	654204	595812	1.01254e+06	496229	539740	756099	545134	621934	450562	681937	588135	711755	575512	614990	775134	751678	647454	738152	702714	901391	593155	588928	822146	644592	590054	695731	653233	912536	638867	894486	778210	813534	688662
POS	M86T303	86.0946	303.438	14260.9	9794.66	20743.1	15464.8	7462.65	10096.3	5391.18	10054.8	49255.8	12284.4	94315.1	14019.3	102167	11593.9	11076	12105.6	10850.3	8111.36	15308.8	11547.1	11461.9	9332.25	10480	7771.88	8819	13294.9	4533.44	14279.6	10566.2	9027.25	13883.5	14397.4	11070.2	11303.1	12041.6	12121.3	14196.7	10500.7	11514.6	14801.4	14641.6	15071.6	14973	9630.41	15290.2	11429.4
POS	M86T25_2	86.1057	24.948	1068.28	3279.07	1334.39	683.266	1113.1	1232.68	1328.83	976.24	1085.42	975.555	2154.7	968.453	1277.82	2025.62	1433.32	1205.63	1306.84	2146.89	1296.39	2197.21	1387.03	350.205	1227.92	2014.37	1980.44	1348.04	1209.45	2384.23	1153.13	1158.39	772.234	1280.82	1168.64	1120.68	1985.79	1156.81	1572.36	1454.65	1166.11	1277.18	1226.13	1165.73	1359.73	1177.13	1083.49	1205.49
POS	M87T345	86.9064	344.965	5707.66	2948.38	3993.37	4707.83	2674.87	4244.84	4200.25	5032.35	4924.45	2782.96	3988.72	7240.4	6325.41	5181.17	4902.49	4461.33	4576.74	4215.84	3203.82	3199.19	2991.19	2485.76	3752.82	3575.47	3872.3	3235.5	3505.6	3793.76	3124.31	4425.35	3702.07	4946.21	2802.33	4128.5	4404.1	5575.02	6681.37	2799.07	5321.46	1927.61	4110.44	5286.69	7290.02	5275.52	4805.55	3471.61
POS	M87T216	86.9879	215.723	2528.58	881.945	2564.78	1479.95	2442.23	610.388	700.369	2442.55	2847.37	1784.63	1843.78	1588.77	1209.51	3345.77	502.076	1048.6	2329.7	750.784	1385.02	1406.6	1534.55	1350.21	1265.54	1136.35	1914.02	812.282	1717.89	2973.12	1611.12	2608.84	721.001	1906.78	2825.21	565.613	2477.42	2544.23	354.926	803.437	980.699	1378.38	730.578	2317.76	821.82	1190.48	1051.74	1880.49
POS	M87T87	87.017	87.2	8292.23	8389.16	7601.13	4584.23	5551.06	6785.54	12959.1	7859.81	18144.3	3643.41	1408.16	7222.84	8507.99	10026.4	1337.13	1340.6	5892.08	5128.07	5968.2	740.527	3428.21	6289.92	2229.06	7001.79	7140.92	1531.71	5367.01	5648.1	7400.21	7157.04	6429	5139.5	4964.38	13577.6	11451.1	5372.98	1779.34	1604.48	4214.33	5262.92	13650	13981.3	11280.5	8983.07	14004.4	20751.7
POS	M87T267	87.0243	266.804	2910.08	2851.08	2898.01	3740.51	4084.74	2321.48	2529.45	2680.22	2170.28	2525.35	3519.73	4175.41	4044.93	3888.46	2231.13	4784.1	1702.12	2163.98	3765.94	2672.48	2703.24	1948.89	3359.91	1998.33	3996.13	1634.03	2783.1	3214.48	2649.45	3496.67	3755.76	4110.31	3461.33	2019.71	2268.51	4472.55	2887.45	3390.18	2865.03	2430.8	3803.79	1574.36	4444.51	3453.07	3494.49	2647.34
POS	M87T360	87.0424	359.598	14478.9	16046	12010	14410.7	13962.7	15229.7	12252.1	11455.3	11949.6	16024.2	14221.1	15804	16170.3	14960.5	15812.5	12955.4	20318	13248.6	13483.2	13857.3	14460.7	12378.3	13797.6	15261	13579.9	12283	14345.3	16260.1	15486.7	13834.4	12567	15307.8	13863.8	11160	17046.4	12813.8	14825.7	18359.2	13237.2	13276.2	15658.7	13231.1	16858.3	17734.4	16621.6	11913.8
POS	M87T26	87.0535	25.645	5779.66	6618.29	6536.73	7432.95	6789.64	5633.12	7522.87	6514.95	5619.52	6248.76	7031.92	5982.95	5583.97	7509.67	7489.63	7473.34	7440.34	7101.07	5882.89	7885.83	6005.53	6511.64	9886.03	5789.89	8103.14	6376.95	6156.17	6673.86	7262.93	6151.98	6773.81	6062.23	6774.17	7437.65	5796.01	6533.59	5886.33	6917.06	7856.34	7261.91	6927.38	5453.83	5958.02	6995.98	6090.35	6017.52
POS	M87T162	87.0726	161.534	2093.68	1672.09	2395.41	1704.67	2195.17	2267.18	1741.56	1418.22	2048.54	1766.78	1815.74	2226.53	2210.11	3963.56	2425.93	2001.88	2150.76	2691.52	1483.39	2057.08	1722.38	1869.26	2348.91	3127.38	2414.79	1727.32	2686.7	1638.88	1701.93	2699.17	2491.72	2393.44	2591.64	2602.75	2224.56	1603.64	3638.54	1769.79	1976.67	2445.26	947.752	1661.91	1722.66	2414.96	3062.04	1748.78
POS	M87T388	87.0898	387.995	4742.77	4349.81	4801.1	3899.02	4267.18	2779.61	4530.81	4319.25	3193.74	2912.96	3781.62	3413.81	3525.46	3705.29	3460.24	854.293	3707.92	3717.33	3811.38	3680.79	4499.42	4463.81	4648.45	3903.08	4094.92	3040.37	3817.4	3770.01	3587.64	3862.32	2767.56	3129.58	4997.56	4740.02	4338.62	3429.38	2202.84	4112.91	5065.92	3584.07	3865.25	3446.69	3342.49	3443.77	3982.84	3939.77
POS	M87T36	87.0897	35.921	7739.25	6422.59	11241.6	6319.6	6893.61	3979.05	5010.23	6366.5	9496.83	8962.66	7911.47	6747.23	8416.16	9064.76	8447.31	8368.18	7869.07	8196.29	6258.01	7985.18	7271.59	7075.19	10427.8	6506.19	7552.81	6992.57	5562.09	7989.52	7578.08	6281.47	7258.48	5891.55	7283.32	8934.78	8766.95	7593.25	7753.54	7822.95	8277.62	7076.5	7375.26	6641.24	8273.54	7707.51	8455.66	8202.05
POS	M87T196	87.0898	196.188	5413.18	8725.59	7118.69	6856.91	3939	18029.3	7075.36	6072.74	5332.57	3446.75	698.643	3217.28	2198.45	1779.58	3601.71	2325.79	1695.97	2935.82	970.384	1167.63	914.292	797.893	878.967	974.44	994.852	930.721	879.242	744.517	375.376	1075.96	730.259	2430.98	929.555	3189.91	2186.14	1134.71	1553.24	795.143	2052.07	1054.42	698	4497.7	4854.1	679.85	7195.11	948.549
POS	M87T212	87.0899	211.79	4632.92	49033.5	5561.06	4676.39	3728.85	6697	4238.34	4401.34	5234.26	3930.44	3199.23	2536.51	2074.54	2986.26	3766.18	2975.9	2620.78	3944.92	3033.21	2201.63	3288.97	3874.14	3730.13	3147.11	3035.21	3408.34	1999.39	2410.52	2666.21	3760.91	4039.55	3365.01	3574.97	3772.82	3763.36	3302.51	2893.31	2445.6	3150.02	2150.07	3542.56	3697.9	5087.46	538.246	4728.43	3918.42
POS	M87T248	87.0981	248.161	35401.4	24247.7	46887.8	42620.3	39138	33308.6	30289.9	33447.4	24393.5	28681	33944.1	35595.8	42892.1	28749.2	27404.5	46793.1	23701.4	25716.6	34414.4	24385.9	31971	22534.7	31968.5	27851.2	34162.9	26119	29221.6	37469.4	32504.2	28630.7	33417.2	32969.4	39683	28156.3	26778.4	37200.5	30164.8	27038.7	33538.7	31940.1	40185.9	28177.3	41088.3	36293.2	39245.9	32169.7
POS	M88T217	88.0195	217.105	7908.06	10167.3	12947.7	16514	13201.4	22948.4	9591.72	9914.2	5043.94	6299.97	9258.25	14589	14739.5	19269.5	15960.8	11670.4	8666.17	9346.66	11402.1	11265.7	12222.1	11769.4	10596.7	10918.6	17594.6	8456.75	14231.3	9732.09	14877.8	8540.85	7622.5	9297.88	11560.4	9285.29	18561.9	12033.5	9103.69	10621.1	10921.7	18700.9	12098.2	17292.2	10308.5	14126.8	8507.13	14913.4
POS	M88T34	88.0194	33.8465	228341	36951.4	226445	218879	360361	76790.4	95011.1	211288	175717	40762.9	1029.71	2877.56	5068.71	8361.36	8844.17	7293.44	4286.12	12403	563.383	970.392	1772.25	659.284	482.104	459.917	1667.31	524.982	876.585	712.716	1127.35	657.305	760.058	4211.26	482.948	4693.69	4032.86	11704.3	3726.55	820.709	3331.01	721.891	1335.63	823.228	2644.74	1090.06	12801.9	998.25
POS	M88T618	88.0744	617.921	404147	396917	474385	385107	417749	190488	275623	410773	282146	131337	167527	202844	174514	445051	488321	272846	492826	162116	254504	87299.2	399193	150887	166449	226712	268060	216183	451085	458777	582207	332878	170014	242747	233310	374108	464039	201104	157813	460638	161633	488615	425731	194825	417586	83134.8	257806	186456
POS	M88T24	88.0849	24.086	21568.9	24425.3	26887.5	28879.9	25809.3	21077.6	25408.7	26434.7	31841.1	111880	30092.4	24784.4	25659.3	30592.3	33811.1	29382.8	27338.6	26037.4	24757.1	28829.1	28487	26226.6	26007.7	22148.9	51453	23419.5	23196	38273.8	35551.7	24934.7	30888.2	21390.3	28746.7	25144.4	26706.3	26704.1	22177.3	27324.6	28369.4	25565.3	27317.8	20752.5	27197.4	25019.6	22752.4	23583.1
POS	M88T248	88.1011	247.865	2799.45	2068.22	960.012	727.352	2905.82	742.312	496.633	474.632	3792.54	692.802	606.407	644.194	672.871	396.568	436.112	904.596	2818.39	2606.68	498.675	2682.54	666.161	2592.86	454.827	2505.03	451.27	476.964	433.786	2625.14	3528.18	620.179	696.883	857.701	3041.09	647.375	589.451	3186.56	2381.11	2737.52	507.707	2852.64	2527.41	477.267	545.553	2642.2	506.087	3002.23
POS	M88T181	88.1102	181.086	6863.08	6306.31	7641	7577.35	5656.33	8561.36	7790.03	8133.72	7831.02	6813.16	8138.76	7685.78	6135.81	8031.11	6996.24	7134.46	8589.36	8993.69	6939.21	7029.93	7368.93	12039.5	7604.23	6935.78	7962.49	8169.74	5116.1	6485.64	4593.93	6816.98	6659.95	8507.35	5691.09	5687.39	8546.07	7179.08	7351.7	6104.8	6951.04	7191.83	7520.17	8013.24	7874.12	8023.15	10195.9	6316.03
POS	M88T210	88.1103	209.71	7403.21	6965.36	4399.27	7140.33	4922.22	4090.08	6757.04	8138.25	7796.61	4956.47	6435.14	5834.82	4762.55	6745.21	3558.47	9789.78	7685.12	6225.89	7337.77	6226.19	6976.82	4661.45	6087.43	5222.98	8254.86	4899.58	7247.28	6551.01	3808.34	6827.17	7082.32	5847.59	4887.57	5119.17	6627.26	6841.31	5195.52	4673.25	5556.97	7102.98	6657.9	5524.09	8648.67	7591.17	7021.17	4603.72
POS	M88T26	88.1215	25.808	286.242	310.073	219.628	126.607	592.573	193.833	402.228	145.311	412.227	317.929	5326.73	4229.31	177.261	184.369	284.509	706.582	198.807	3914.33	137.229	453.117	146.842	84.8331	713.948	122.648	539.856	164.931	255.321	4117.27	173.611	267.409	106.015	73.6582	230.191	3838.95	247.867	638.877	307.941	173.972	146.799	4083.74	200.027	2393.47	369.801	376.416	299.444	128.426
POS	M89T34	89.0229	33.748	6792.13	403.101	5979.45	5374.97	10850.2	1700.24	2226.39	6036.88	5324.28	674.204	60.2467	154.004	284.505	127.045	287.471	214.904	198.917	505.648	41.4439	0	95.9805	30.5633	0	0	101.686	22.4896	0	66.7362	21.4176	112.447	26.3861	233.639	176.424	26.4423	191.048	319.112	113.765	70.9303	133.838	160.773	133.707	54.7754	80.6152	138.05	309.814	137.06
POS	M89T246	89.0327	246.205	14770.4	14586.3	11981.8	14173.8	14231.9	10924.7	13033.8	13353.6	13387.7	13082.7	13816.1	14577.5	12425.5	14318.1	14703.9	15738.8	15149.9	12683.6	11448.6	15336.5	12916.9	14325.7	13880.4	10622	14978.3	8877.34	15655.9	11981.3	14181.8	15188.2	14174.3	13004.9	15372.6	12388.3	13279.3	15343.9	11136	16000.1	13185.8	13153.9	15263.7	11916.6	13839.8	13403	14131.6	13756.5
POS	M89T52	89.0689	51.915	50941.2	5003.11	56274.4	67818.5	47912.5	78628.4	54139.1	47499.6	46574.5	42105.1	48277.9	29871.6	38442	27296.8	54074.9	42507.1	47363.7	64678	43836.9	26892.8	90519	65943	54574.1	85270.7	59547.4	29404.6	38100.4	50851	93936.4	35749.4	48517.1	40153.4	46814.1	80854	21084.9	69075.9	36550	58861.1	12598.7	42063.4	56870.5	51223.2	48486.4	55642.9	55003	61657.2
POS	M89T25	89.0807	25.111	11672.4	14446.7	12996.5	13911.9	12927.9	10402.8	16041.5	14917.5	14300	9938.69	14630.1	14347.5	13266.7	15173.1	18185.1	15040.3	14105.4	13333.6	11366.5	14970.4	13491.8	13896.4	13831.6	10693.1	14178.6	9499.17	11620.1	14250.2	14963.2	12396.4	13297.9	9020.9	13790.2	13855.5	15910.6	14044	10019.1	14659.8	13813.3	12276.1	13654.6	9459.17	13350	13827.1	12863.5	13246.9
POS	M90T34	90.0153	33.561	10227.8	828.82	10135.2	10232.3	17067.3	3319.67	4278.83	10888.4	7481.72	1998.64	0	0	95.8629	270.634	250.913	227.175	343.11	237.977	23.1166	0	0	43.661	0	0	0	0	0	0	33.9142	0	0	37.2413	0	372.198	85.9966	505.147	169.734	0	44.3626	0	31.3799	108.822	37.656	0	603.644	0
POS	M90T329	90.0533	329.466	102018	327900	130222	136972	163890	83785.3	105418	132987	122313	126590	119688	101833	167666	135099	111310	157337	115140	92220.6	109857	88448.3	96529.4	112278	123515	96438	126138	69653.1	73408.8	96051.6	121654	112017	103267	89617.6	351671	106267	94459.3	122997	53144.2	108522	129248	56708.4	125059	113256	114802	109456	139874	121141
POS	M90T25	90.1011	25.3565	1755.72	2287.96	2171.06	1722.99	2189.44	1738.88	1824.5	1900.18	2287.73	1659.02	1789.99	1801.37	2002.05	1944.16	2290.83	1978.77	1462.71	1699.28	1795.17	1596.68	2167.4	2007.12	2142.08	1756.27	1755.32	1719.25	1781.06	1838.59	2012.81	2126.48	1925.7	1458.54	1879.25	1707.33	2024.23	1977.79	1762.03	2131.85	1974.32	2121.89	1669.78	1442.58	2046.77	1732.15	1865.34	1806.92
POS	M91T268	90.9138	267.543	0	51.958	0	0	582.345	0	245.626	0	40.2056	0	75.2582	72.1714	39092.6	109.893	60.327	23.2666	96.2012	263.781	22.6604	22.7997	48.9088	32.1227	29.9093	19.2427	0	30.9005	35.9381	81.7701	0	18.2362	27.7886	93.7046	119.915	44.2486	39.4028	69.0115	0	527.486	0	0	27.3976	106.933	33.6931	0	256.733	64.4825
POS	M91T28_1	90.9448	28.201	871.308	452.632	373.103	240.636	76.979	724.819	593.854	286.021	1028.1	1091.28	158.502	182.166	254.431	117.373	0	99.6178	16.7411	24.7885	81.2635	13.7959	51.2578	58.007	90.6933	390.786	40.9558	301.436	13.7354	49.277	68.0373	15.3273	103.618	235.372	14.8736	2648.32	647.822	146.025	664.877	199.352	66.4637	39.7347	636.671	1912.34	839.002	936.19	1005.15	1076.9
POS	M91T330	91.0564	329.707	2854.48	9945.06	3916.71	4252.83	5728.02	2361.34	2903.11	3742.7	3587.94	3634.25	1835.1	3283.9	4907.34	4104.83	2395.54	4335.39	2990.9	2245.5	3621.52	2708.95	2353.62	3903.98	3679.16	2899.35	3554.84	1913.85	1485.26	2416.09	3417.43	3286.44	2873.8	2801.06	9124.34	1449.89	2148.5	3445.18	1590.74	3258.37	3394.66	1863.58	3213.07	2642.67	2168.72	3177.46	3936.94	2545.42
POS	M91T283	91.0521	282.592	44166.7	59944.4	43953.7	49187.8	53507.9	61434.8	42608	45846.1	44027.4	41157.3	47379.4	48423.9	69519.7	49893.5	41836.1	45779.9	46599.2	42357.8	56303.8	40480	41745.4	44102.7	40630	44190.6	43541.6	41799.3	47561.8	44415.7	44189.6	44926.9	46490.3	56283.7	55842.8	41439.5	40878.4	52057.2	52255.2	44410.6	41825.3	50954.2	67658.3	43993	48832.1	44801.9	43483.5	45652.2
POS	M91T240	91.0522	239.681	30281	26654.7	27147.5	29421.4	30136.4	24581	35205	23583.6	21259.4	32814.9	39575.4	28812.2	30708	25105.1	21565.5	30022.1	23067.8	22731.4	29555.2	21647.4	24139	19222.1	25069.4	29952.6	26452	19807	23917.9	24285.3	23396.1	24106.7	29852.7	24053.8	37810	21542.2	21594.9	28235	22678.5	23697.4	23336.9	25452.5	29284	22215.9	26210.5	27093.6	26865.4	28165.1
POS	M91T28_2	91.0639	28.2275	1838.9	4776.09	6617.96	9325.2	6761.83	9555.15	4801	3451.44	2709.27	4737.15	3309.27	2241.63	1553.75	4839.35	3261.4	4504.18	4748.59	4283.17	5628.45	3771.51	3334.12	4416.83	3592.01	6049.75	3441.54	1640.25	2234.84	5229.94	1079.9	3236.83	4068.5	1725.55	5471	3131.65	1777.24	2505.47	3135.31	4253.2	3809.96	3558.32	4348.36	7577.73	3317.1	2100.29	2460.03	5195.69
POS	M91T51	91.0522	50.6455	14390.3	25485.8	17442.9	14088.7	17000.7	21126.9	14692	9810.46	20115.2	13228.8	9106.96	1431.71	13212.9	9519.2	9212.06	23566.6	11723	8937.36	5725.81	9903.68	8073.92	5753.99	8533.74	7583.23	8162.05	8316.97	9060.48	7173.63	9823.6	8074.91	9442.96	8689.95	5041.77	7896.32	8710.29	9737.44	8211.17	14159.8	5030.84	8402.26	9411.5	6714.74	12659.7	9972.29	10466.9	9659.81
POS	M91T25	91.1327	24.721	2047.23	1173.21	1354.17	1618.03	1300.63	1585.13	1816.16	1957.71	1452.3	1853.59	1382.84	1196.93	1221.27	1500.61	1029.44	1291.81	1472.43	1430.37	1935.55	2758.17	1576.11	1585.14	1431.5	1054.25	1622.1	1563.06	2574.8	1853.67	1781.66	1627.37	2127.36	1212.86	1672.72	1888.55	1293.67	1378.84	2111.67	1500.42	1363.34	821.347	1365.95	1248.78	1783.63	1765.89	2018.8	1442.03
POS	M92T304	92.0144	303.974	2331.03	2080.55	1677.94	1884.5	3408.34	1838.56	1359.6	2881.84	1559.31	1990.61	2597.27	1769.43	1405.82	2001.38	1855.84	2480.61	2351.58	1154.01	1908.2	1946.69	1746.56	1804.5	2962.19	1479.81	2952.18	1811.7	1582.79	1470.48	2753.03	1641.16	3479.48	2473.55	2459.33	1289.75	1216.35	2696.06	2103.02	2632.95	2060.02	1858	2346.14	2152.83	2470.55	2579.2	2546.88	1535.92
POS	M92T273	92.0472	273.267	919.209	515.816	1068.38	481.076	826.479	1282.16	673.685	642.724	904.077	64.1465	503.924	418.493	909.149	1559.58	2133.9	336.642	426.16	968.115	1297.2	337.992	641.64	371.767	503.428	950.471	836.62	675.16	97.8555	870.563	1003.74	530.964	555.694	256.326	669.922	803.933	1995.05	476.657	1283.83	677.022	232.333	504.544	3475.13	1851.53	478.862	1276.6	2635.79	4951.47
POS	M92T283	92.0555	282.637	2910.01	1264.5	3718.52	4358.18	7244.1	3345.3	2602.86	2901.21	3233.59	2016.06	3262.27	5739.32	4789.15	3666.46	2979.84	4301.64	3338.04	2646.26	3924.25	3081.22	2341.47	1948.72	2900.66	2584.95	2519.33	2406.13	3591.04	2279.55	2722.62	2830.94	3032.81	3694.89	4139.52	2508.37	2419.63	4565.9	3809.04	4779.73	2516.43	5758.45	4871.23	3404.25	4026.49	3001.02	2865.71	3117.52
POS	M92T240	92.0555	239.672	2087.58	1705.08	1930.02	2216.4	2538.73	1812.54	2053.04	1568.56	1289.63	2910.84	2656.57	2259.18	2122.45	2574.52	1558.1	2679.5	1955.39	1789.39	2244.12	1577.43	1932.39	1376.27	1797.56	1805.16	2128.72	1779.57	1757.15	1923.99	1571.57	1577.18	1838.33	2216.47	2028.85	2112.92	1868.22	1924.39	1692.28	1431.79	1873.74	1929.64	1953.57	2018.16	1810.27	1948.29	1362.71	1868.57
POS	M93T28	92.9432	28.1605	296.878	54.2944	124.363	164.664	20.3263	291.973	217.221	62.6144	398.121	442.773	114.097	76.2173	156.975	24.8261	6.82211	17.5689	0	13.6161	7.56826	0	23.692	8.38177	28.2425	172.019	16.3429	231.945	29.44	19.7875	0	13.2707	39.1161	71.7189	18.8907	967.076	250.549	6.94682	212.944	80.3606	0	7.14256	154.467	694.079	330.581	405.114	396.87	406.925
POS	M93T271	93.0427	270.735	1289	1284.67	855.594	1456.69	1358.62	1093	998.102	1517.76	923.915	3719.77	1436.7	1330.96	2326.08	3235.69	2005.92	1417.84	148.483	1814.74	1627.69	2102.75	2237.44	1109.55	1642.39	1646.66	1136.2	1635.29	2340.02	2444.15	1431.05	2708.12	1667.76	1668.48	1719.46	2334.5	6080.12	2798.4	2175.93	1012.29	857.429	584.687	3708.16	1505.44	1219.18	878.038	1459.93	1569.15
POS	M93T362	93.0428	361.813	32089.7	36001	26541.1	27685	23288.5	19351.4	33936.1	35380.7	27365.1	20326.5	27270.5	24548.3	27161.3	22349.4	27521.4	26489.6	24502.4	25999.7	21952.1	26051.3	25028.7	21263.5	26002.6	23287.8	30627.9	17552.6	29177.8	24400.4	27013.4	23529.4	24908	29970.7	39210.6	31375.9	27038.1	23283	24723.7	25167.5	23920.1	23979.8	27888.1	23835.9	26363.5	25439.6	24865.8	28346.6
POS	M93T390	93.0427	389.73	9809.71	19334.4	22900.7	12701.8	19352.7	25299	21074.1	17744.8	15322.7	26164.3	19346.6	11157.3	22918.6	20458	16609.2	19351	8828.52	16600.1	24831.1	16719.1	18335.5	16818.9	17658.5	23999	18098.3	16877.9	18977.7	17078.7	21615.5	18080.7	27808.6	20916.9	21442.5	11272.5	19365.6	19926.4	9640.88	17539.7	16679.2	18319.4	11024	20901.2	18867.2	18460.8	11878.4	20735.3
POS	M93T700	93.0554	699.798	3445.01	3295.18	3919.2	2429.23	1897.92	3161.33	3593.96	3636.16	3707.68	2661.63	3533.78	1905.72	3339.64	4053.91	4512.71	3779.5	3044.28	2497.81	3195.92	2647.35	3808.06	3196.14	591.722	3447.05	3912.14	2692.11	5500.72	2782.11	3548.76	4033.94	3508.97	1816.27	4231.71	3207.61	2514.16	3755.44	2138.98	3792.54	3772.13	3183.21	3473.93	2290.59	3870.65	777.561	3998.04	3573.53
POS	M93T662	93.0553	661.959	3033.35	2335.63	2451.17	3047.74	1689.56	1992.07	2579.2	2480.3	2440.83	1586.82	2327.2	1540.99	1983.62	2393.18	2033.72	2469.06	2394.6	1871.73	2069.21	2155	2430.03	2379.87	2100.44	2260.21	2230.87	1536.52	3295.74	2152.67	2263.27	2347.46	6069.17	1739.9	4398.95	2907.71	2235.02	2074.95	2171.65	2275.13	3640.74	2360.46	2260.02	1692.78	2480.31	2602.03	2195.36	2321.03
POS	M93T621	93.0553	620.915	10079.3	8240.37	10618.3	16827.2	1844.06	7562.99	11321.6	8687.97	12211.3	6924.21	9557.35	7655.03	7992.49	12538.2	4263.18	11013.8	8037.49	7740.68	7528.13	2256.35	9296.31	8820.35	9445.44	10779.1	2192.38	7354.67	3418.92	10258.7	10344.6	10280.3	9714.96	7317.98	12472.1	262.831	9686.18	10186.3	7433.78	10120.5	9967.24	7416.76	10410.3	7411.52	5088.44	9742.05	12093.6	9389.49
POS	M93T240	93.0679	240.015	11952.6	16294.3	13181.4	14441.6	12102.4	12716.8	12753.3	11361.8	10765.1	18956.4	18099.2	14203.3	14632.9	11819.6	10112.9	15724.5	12724.9	11571	13260.2	11166.1	13954.9	8212.84	12173.8	12674.8	14697.9	9441.31	12399.4	11959.8	10469.7	12219.6	13803.9	11567.7	19810.9	10758.2	9799.76	13258.5	12393	9967.01	12819.1	12124.4	14657.1	11914.9	12426.2	13327.8	12779	13622
POS	M94T274	94.063	273.576	5298.14	3095.62	4787.85	4739.86	5414.89	14323.4	4562.3	7297.86	12020	1733.06	4258.6	2881.36	6530.64	11772.2	9132.5	2563.82	7582.15	4693.71	5844.73	3425.18	4291.04	3394.98	3771.76	6084.79	4603.15	5353.57	2320.29	5671.54	8373.47	4153.55	3826.4	3364.07	3766	8277.26	10669.5	4213.84	53606.5	3899.2	3615.58	2661.8	11861.5	9251.87	3429.65	6138.29	13203	48502.7
POS	M94T242	94.0628	242.077	8425.67	17097.6	8292.59	21245.2	12804.1	56347.3	8722.53	6594.45	17282.3	9676.03	9161.5	7078.15	9133	17785.3	8627.53	8267.29	17861.2	10077.7	8493.28	7549	9195.86	10308	8992.29	8140.22	8035.41	6596.86	9265.18	9427.89	11937.6	9192.98	8138.31	6951.81	10003	9242.17	8132.13	9181.16	30298.1	9012.96	7782.05	12101.3	10109.6	9421.22	8552.19	9847.57	8546.74	51423.1
POS	M94T25	94.0752	25.0575	9285.44	11122.7	12536.1	12199.4	10350.9	7580.41	11561.3	12868.7	12463.8	6744.84	13422.1	11831.9	10680.4	13406	14601.2	14537.1	10176.5	10477.5	8933.2	12361.6	12011.6	12323.9	13391.9	8808.38	11854.8	6409.82	9576.84	11476	12717.6	12311.6	13019.2	5771.72	14257.9	12793.1	13433.9	12403.9	7017.48	12350.7	13322.7	10594.5	13007.3	7164.9	11776.8	10693.9	11133.9	11656.2
POS	M95T333	94.644	332.572	932.511	98.736	516.203	522.964	697.423	394.491	805.274	675.293	614.922	799.566	959.37	1036.43	504.787	373.645	430.606	652.879	774.138	635.601	982.187	959.167	881.206	407.738	794.515	678.801	460.192	1083.97	1152.2	714.602	594.406	900.621	844.17	1059.63	88.5543	755.022	550.2	1071.33	1164.28	519.935	858.255	732.374	706.958	625.32	568.488	887.576	778.709	961.723
POS	M95T313	94.7752	313.455	957.674	682.886	613.148	999.872	820.034	569.619	645.397	712.945	599.118	668.484	739.815	380.248	562.072	933.304	1038.01	951.69	571.704	679.718	766.544	933.468	895.237	523.606	1152.86	948.149	855.109	703.071	911.848	603.267	1072.37	715.088	767.856	914.307	913.978	1076.17	1429.64	1105.27	914.359	660.171	1041.7	607.21	1225.99	837.275	849.684	316.077	728.904	584.613
POS	M95T332	94.9276	332.105	324144	80309.8	225460	260009	259030	286073	254724	238834	214455	225131	288234	341570	309359	279065	270914	299086	276423	266891	293407	291232	290639	240451	282272	324969	277849	294925	339420	335868	284624	322992	250438	350522	95685.3	243451	277886	320084	399561	287412	281407	354206	307694	271850	366587	336273	278104	258905
POS	M95T283	95.0471	282.653	22599.5	24449.4	21690.3	23722.8	25266	29050.3	18836.7	22220	17927.9	22680.8	24320.5	26139.8	30400.1	23339.4	17409.4	22778.5	21868	18970.4	26373.4	20734.7	20509.8	16526.8	20035.4	18688.5	20272.2	16569.3	22497.5	21242.7	21797.3	19952.2	22668.6	29709.1	31852.3	17936	15955.2	27178.4	25931.6	21021.7	20847.6	20171.3	31280.3	21470.2	24307.5	19309.3	21022.1	21110.2
POS	M95T314	95.0589	313.766	361930	234850	234098	379754	291130	215746	315401	249563	231133	288166	361827	411645	394984	368614	335644	430900	267622	288919	313092	326446	356535	315219	388562	338896	362471	241716	405642	355521	381193	401298	306335	318587	375153	312216	379527	393354	293976	345712	366767	388472	447411	269733	363068	368895	369027	392664
POS	M95T361	95.0584	361.189	25203.7	25765.2	25482.3	33465.8	29218.8	20242	23665.2	23759.4	26589.2	19906	24080.4	23405.4	27732.6	36093.8	21375.4	29871.8	20604.4	19793.5	21147.4	21782.2	24370.8	26621.3	24410.9	23554.6	25543.2	23624.5	26420.3	26325.9	25347.7	29400	23730	21532.4	29064.6	30054.7	23512.1	21002.3	20598.1	22971.2	23177.4	25110.6	25886.2	24249.4	21736.8	25930.8	23160.5	24875.9
POS	M95T141	95.0585	141.001	4556.32	3677.27	7229.46	9047.45	7186.6	6726.57	5659.2	4236.87	5714.35	4829.87	6101.37	5703.09	6265.85	5863.3	5477.76	6458.48	5435.91	5515.37	4131.48	6196.12	11936.1	5604.63	6057.53	99200.4	6030.38	4187.65	7733.68	6656.94	5277.4	5826.65	6573.59	7188.21	5109.09	5252.66	5754.44	5183.16	7178.88	5540.14	4977.64	5604.74	46879.4	6116.61	6934.31	38401.8	1051.48	5455.5
POS	M95T45_1	95.0582	44.54	12470.8	4336.19	9236.21	9915.13	6873.26	12052.5	10709.9	9126.46	7744.8	6884.07	396.881	5376.63	11570.7	10475.4	7175.28	8895.18	7707.4	6953.15	6960.11	7928.58	864.902	5105.92	5207.67	11354	8520.62	465.152	10613.5	7394.31	7061.71	6948.01	15935.2	3808.06	3044.12	12529.5	14041.6	6318.76	6335.75	7383.89	7507.6	7232.66	10564	10528.5	10324.1	8088.73	12185.2	11895.4
POS	M95T45_2	95.0834	45.114	14463.9	5687.33	8520.47	13188.1	11768.4	14098.8	11506.2	4765.36	11319.1	7734.71	18493.5	8027.2	1097.71	7607.73	10543.3	14195.3	10920.3	11364	5299.83	9225.17	8359.91	9687.75	12611.1	4591.93	6514.76	7229.41	14638.2	6390.86	9998.55	9387.37	16477.5	7912.13	8260.45	7047.04	6799.14	18967.1	8473.68	1105.98	10434.9	9067.19	15400.3	13439	9624.25	12750.5	9902.2	15959.8
POS	M95T27	95.0958	26.765	959.572	1173.12	1826.02	1003.18	1498.24	1345.6	2320.26	1753.85	1198.46	1163.62	1472.87	1345.57	1785.95	1244.05	2041.08	1937.51	2069.88	1721.93	1583.64	2027.6	1193.03	1141.42	917.857	1344.53	1102.82	1393.02	1443.71	1143.48	1094.63	1026.18	1322.75	816.174	1478.66	1204.44	819.824	1556.08	1069.79	1712.37	725.175	1474.23	1287.46	1690.9	948.218	978.451	897.518	1184.38
POS	M96T157	96.0058	156.732	3087.03	4405.16	2654.4	3784.13	5497.04	3126.14	3969.12	3633.04	1842.4	3898.63	1524.05	3421.89	5410.67	2541.22	2460.55	2186.96	2439.28	3114.8	4035.38	1875.51	2576.35	3023.86	3209.42	1790.3	2574.45	3110.13	2453.91	4197.42	3243.35	4083.69	2084.23	3110.92	1960.56	3131.08	4735.64	2555.04	2152.16	3379.09	2440.57	3020.72	4016.9	2631.59	3078.13	2327.39	3348.61	3008.15
POS	M96T282	96.0508	282.031	2685.95	1601.99	3041.27	3044.74	1491.45	2151.01	2089.55	2716.24	1241.8	3199.07	3424.27	2554.99	4210.03	1952.1	2338	1744.09	3117.5	2582.95	1129.67	2123.38	2516.85	2886.03	2156.63	3951.58	2891.27	2749	2097.65	2775.4	2812.85	3522.97	2503.39	1614.9	2587.42	2128.16	2098.02	2729.46	3542.68	992.129	1352.63	2079.16	2807.26	2210.91	1521.32	2162.29	2721.55	1136.03
POS	M96T26_1	96.0548	25.645	2849.35	3531.82	4246.53	4664.25	6255.24	13214.5	2899.21	3424.67	5690.17	3063.9	7724.89	3340.16	3106.55	8713.11	2942.42	3159.8	32862.8	5969.93	5495.95	3187.77	3680.91	4146.13	4136.68	10170.1	3500.9	4332.5	2845.71	3169.28	7550.27	3090.91	7933.61	3703.29	5325.2	6019.33	3921.28	3455.55	110976	2460.91	4359.82	2694.63	2925.73	2242.48	4529.55	3679.81	3296.61	116224
POS	M96T314	96.0617	313.8	19183.9	11526.3	10962	18292.4	18039.1	9892.37	15549.6	12848.2	13677.6	14974.7	19183.4	20364.4	17352.3	17570.1	13830.2	18918.3	10219.6	17383.8	15952.8	17255.8	16150.8	12484.9	16386.3	15045.6	16027.5	9752.15	20494.4	17289.6	20495.3	21014	14717.5	15298.8	17784.2	15658.9	20729.8	18911.2	13938.3	17441.5	16803.4	20870.3	22618.1	12570.2	18676.7	19519.6	15571.4	19877.2
POS	M96T360	96.0659	360.326	4324.62	2959.71	4805.33	12439.9	11280.2	2565.64	1075.93	2413.98	8937.01	2174.19	3482.33	2658.1	5522.07	7685.09	959.152	8135.22	3837.76	1579.92	822.753	3386.11	6542.51	9701.22	3195.89	4409.4	3515.33	2421.23	2146.24	5392.96	3432.93	9202.49	3990.94	2097.66	4049.6	2100.35	1702.13	1586.3	3002.49	2911.52	4423.96	4191.2	2239.61	3505.53	2259.54	2512.94	3249.66	684.586
POS	M96T300	96.0787	299.621	667.357	2860.79	887.126	984.932	1037	643.141	1074.22	937.738	2547.84	733.621	842.668	836.494	799.928	28507.5	12137.4	1537.34	1529.01	39404.6	4904.81	859.697	1065.04	1993.96	4491.67	650.4	722.989	1014.93	532.467	1094.98	1959.1	17401.9	888.858	513.174	733.02	817.276	11097.2	4565.06	859.248	888.85	1263.3	1011.52	4775.76	1110.29	1947.31	3556.56	8825.7	1457.26
POS	M96T262	96.0761	261.843	1221.43	855.212	1410.83	1436.5	1733.06	1134.24	701.587	1031.88	1192.54	1659.76	1121.36	1565.37	1758.11	2544.33	1868.88	1908.59	1106.42	1009.95	1374.37	1432.66	1778.38	700.187	2223.48	1361.36	1360.14	1205.23	1387.67	1192.4	1696.27	1680.48	1283	2087.83	2900.49	1013.4	1446.48	1595.97	1460.56	1805	1462.42	2060.04	1740.64	2713.61	1534.24	693.352	1651.09	1885.89
POS	M96T26_2	96.091	25.708	1319.63	1436.62	1852.16	1605.19	1669.86	1254.87	1788.08	1657.36	2119.97	2317.36	5650.71	1570.14	1841.81	1816.77	2422.06	1664.08	1377.19	4726.55	1225.42	1913.02	1750.09	786.526	2025.72	7775.7	2745.8	1444.99	1579.71	2569.47	1697.44	1853.78	6053.95	1195.7	1814.78	4745.85	1975.66	1497.36	1077.38	1863.01	1928.51	1687.27	1881.78	1798.03	1733.93	1886.11	1515.05	101378
POS	M97T332	96.9257	332.312	49635	11471.6	35941.4	39388.2	39286.5	42914.4	37404.1	33419.8	33444.5	36423.3	41321.6	52376.4	44846.2	42876.8	40770.8	48495	38784.7	39152	44737.4	47106.1	45319.2	34925	45000.8	47967.1	38264	45318.4	51335.9	51320.5	42873.1	47087.2	37266	51710.5	13536.6	37849.5	42587.7	52331.1	61187.3	46488	41153.5	51398.8	49593.2	43695	54881.3	50011.7	40512.6	40061.4
POS	M97T282	96.9932	281.594	347.964	400.36	401.781	418.721	471.943	313.513	489.632	465.201	353.419	319.07	515.578	464.554	434.05	698.314	562.429	546.959	392.701	372.984	430.016	446.637	380.03	415.587	562.646	460.69	429.156	419.413	455.067	423.595	727.568	464.911	496.209	411.627	373.386	447.47	737.675	465.247	636.891	444.141	564.756	411.323	541.052	468.41	587.92	531.116	475.41	433.19
POS	M97T296	97.0263	295.83	9741.23	4029.14	7588.15	9455.46	5568.43	5379.04	10450.2	13304.4	14255.5	4127.36	5276.68	10786.4	9944.47	9245.75	4244.76	9287.43	5733.19	7789.72	10954.4	9261.04	8468.19	4253.3	5808.75	8884.36	4117.84	9403.6	5449.91	9576.46	9681.77	10763	6191.78	8752.9	6247.46	8376.64	11587.9	6472.69	10933.1	8787.2	11648.7	6171.18	10609.9	8937.99	1851.17	8565.05	10845.1	3974.52
POS	M97T143	97.0263	143.081	6000.66	5049.28	6069.99	1377.77	6738.98	6176.98	1659.3	7697.43	1531.31	2593.55	1714.58	3103.51	7028.05	5865.87	7490.92	5558.26	6201.61	1712.09	1523.67	1970.47	897.475	1873.41	1330.94	1897.01	1110.57	2901.65	5391.41	446.616	6593.29	6409.65	7189.77	2390.58	6759.46	2652.59	1611.57	5735.19	2427.55	2121.19	6251.61	1760.36	1413.4	4441.3	1186.03	1922.17	5765	1799.79
POS	M97T199	97.0264	198.84	1927.29	2069.58	2588.05	1447.89	3427.48	3467.96	1838.8	2838.09	1688.77	2358.87	1331.91	1637.49	2447.2	1494.93	1222.8	1483.56	936.212	1978.8	1869.64	1534.52	1285.02	1661.45	1272.47	1257.61	1365.68	1600.96	1428.21	1992.58	1510.23	1603.19	1599.44	1787.26	2317.92	1537	1167.77	1642.82	1726.01	1609.29	1734.23	1507.96	1757.76	1730.62	1304.78	1231.23	1497.79	1728.08
POS	M97T25	97.0503	24.7	3665.7	3523.9	4519.84	3289.05	706.666	3621.2	3869.58	4210.47	4809.44	3538.07	396.159	1091.73	812.077	4374.43	575.003	891.862	4769.34	3644.83	744.123	4084.09	757.699	822.065	4724.55	3105.32	3746.04	3365.87	734.2	681.501	4628.53	3999.48	4031.45	3407.52	4216.4	3309.01	3903.32	4827.19	8320.36	790.5	3797.13	3883.62	4964.17	3613.13	4163.79	4240.24	4391.42	9682.28
POS	M97T314	97.0738	313.738	41929	26606.9	34758	42738.5	45536.7	21996.3	31311.7	36378.3	26838	29151.3	39683.4	42518.9	43800.8	39180	33352.1	49640.7	31312.6	32887.6	35091.8	35929.4	40313.7	36720	40955.9	38938.2	42087.3	23540.7	41848.1	40311.6	45027.3	44934.3	40992.8	27091.8	36393.8	36645	37039.2	40191.3	33978.8	34307.2	41720.5	43808	49145.7	29254.4	39849.4	42563	38333.9	44461.9
POS	M97T26	97.0864	26.16	1517.65	2246.6	2042.75	1839.05	2134.02	1335	2901.5	2103.13	2146.52	2743.84	3539.33	1319.01	1937.68	2443.02	2062.27	1657.56	2139.39	2241.54	2058.86	2223.82	2927.29	1286.13	4926.02	2570.1	3073.03	1370.83	2020.28	2366.1	1548.62	2420.07	2604.26	3696.08	2477.43	2292.97	18521.4	4124.41	1753.77	9189.07	2221.78	2557.12	2731.06	1429.93	2385.91	1751.66	2063.34	14846.4
POS	M97T46	97.0989	45.797	1206.71	2870.47	7781.66	6000.28	1605.78	7716	5874.93	4931.28	1471.52	2364.73	2696.57	1581.2	1816.35	1303.82	3640.6	5518.99	2444.18	1673.65	771.709	4986.76	971.392	1267.42	1177.91	1713.22	6295.74	3942.63	2634.21	3173.92	3781.56	7440.34	1782.2	3707.96	3739.73	1074.04	1235.05	1882.12	2548.4	1276.68	1002.77	1439.59	10126.2	1685.19	1896.97	5002.91	1319.59	1257.62
POS	M98T76	98.0216	76.381	5470.61	2393.24	3537.29	7816.44	4749.04	3209.37	6941.88	4008.23	4493.07	3683.14	6407.52	3237.06	7333.12	9491.28	3796.58	6582.46	6701.69	3561.86	3575.83	7493.26	5995.76	5126.99	3757.06	4297.94	5961.13	3168.4	6105.63	4695.88	4714.82	7081.33	6645.26	5574.79	5463.1	6172.18	6612.5	8607.31	8597.06	7750.31	4620.38	5657.52	5771.15	6714.63	5732.56	5609.34	6128.45	6194.41
POS	M98T274	98.0328	274.338	2819.57	3248.57	3264.69	4202.86	3137.64	4071.72	3226.11	3820.04	3519.51	2597.04	3112.84	2641.77	4933.14	5971.88	3201.64	3506.85	1882.03	3568.76	3371.63	2890.24	3748.18	3583.34	2657.32	4467.73	3269.13	2068.17	2201.24	4444.32	2626.06	3633.41	3214.77	3522.39	3453.86	3039.4	1978.3	3951.72	3842.56	1854.71	3479.42	2166.27	4187.13	3677.18	3514.11	3440.4	4100.3	3782.58
POS	M98T699	98.0691	698.628	2221.75	2141.09	2718.23	571.378	2778.78	964.18	1907.89	1972.16	2192.08	1891.24	2716.1	2249.68	2249.59	2060.21	2221.56	3366.86	1411.46	949.56	1820.24	2341.03	1757.91	1595.03	1613.76	2628.56	2722.82	1190.63	215.737	2510.73	2346.84	2529.33	2179.74	835.383	2608.76	2247.35	2779.07	2224.94	779.105	2491.71	2068.81	3143.54	2747.71	959.19	1211.96	2851.77	2842.41	2632.56
POS	M98T306	98.0689	305.529	12627.9	6695.79	7937.58	10801.6	8474.33	8129.05	7995.06	6767.73	12780.5	8423.14	12796.6	8087.44	8023.21	8747.21	15888.3	10417.1	10696.6	7870.78	7389.36	11800.7	10758.5	9126.23	16688.3	10990	9187.43	9879.48	7774.89	6846.94	13595.7	13636.5	10241.1	10601.6	7233.28	6472.24	13068.3	14303.8	9881.25	13318.6	10604.1	15144.8	7650.89	9938.99	7910.77	12312.3	14240	10854.3
POS	M98T270	98.0942	269.696	9691.62	14890.7	20126.9	8056.19	15415.3	22189.5	20083.9	10038.6	8972.45	5998.3	9256.61	9743.27	15023.6	40003.9	9838.18	5092.02	4398	57092.3	9666.88	3703.69	12542.2	9508.93	16150.4	10064.5	8190.47	6871.92	8973.88	13681.8	11153.6	12422.9	7885.03	10108.1	9615.37	43131.1	11338.4	8412.88	10174.2	42527.6	4715.44	4854.27	14137.1	13655.2	13075.3	7084.93	18433.6	9753.07
POS	M98T237	98.0942	237.112	11967.2	10955.4	10323.1	6899.59	9857.13	10650.1	9869.15	8696.6	14359.7	11550.4	4566.45	5682.17	5510.87	10805.5	4125.92	8130.81	6265.33	15353.1	7214.76	7258.37	5128.27	6243.23	6445.82	5581.62	5043.17	5387.74	5141.48	5451.91	5157.38	5151.99	3696.15	6666.15	4578.99	7971.98	7815.11	7212.69	7076.48	7382.21	4798.52	5102.59	6272.81	11034.9	6651.77	4989.7	5945.32	5496.19
POS	M98T26	98.1069	25.923	3189.55	3282.01	6795.43	3698.38	3700.35	3799.16	5686.4	3578.02	3781	3447.05	4033.59	3373.05	3502.48	5842.96	5352.05	5494.7	3811.69	3491.48	3582.62	4557.41	3583.08	4111.28	3568.91	3874.99	4421.23	3885.59	3932.56	4155.17	3477.49	3554.12	5515.75	3384.77	3927.28	3797.78	3375.92	4143.59	3648.89	4412.44	4138.02	3821.8	4572.99	4516.93	4037.13	3429.75	3081.87	4426.94
POS	M99T332	98.9236	331.79	952.82	248.221	1343.97	1836.62	1218.29	1794.43	1519.63	1402.09	1281.83	1540.32	1731.13	1929.95	1087.4	1907.09	1933.06	1902.49	1460.48	1554.21	1525.62	2412.38	1796.95	1612.74	2121.75	1741.57	1816.28	1984.56	2167.11	1798.66	1495.51	2088.3	1208.87	1719.01	284.501	1519.19	1715.37	2044.96	2509.11	1919.51	1948.61	2153.82	2045.85	1793.07	2261.12	2079.62	1554.06	1437.74
POS	M99T425	98.9732	425.421	11018.6	10621.3	9578.88	7592.81	19881.6	10078.3	9297.27	15479.8	14871.2	17756.1	11627.6	8129.66	9611.09	9941.44	8613.08	7472.34	13876.1	11392.9	12703.8	8325.76	9510.68	6004.29	7996.72	10351.4	11362.2	15910.2	6328.57	6929.07	9145.84	9419.46	12230	9463.25	12965.1	10438.5	12969.8	8046.73	7774.43	10027.8	9970.04	10884.5	7815.89	11281.6	7305.88	8965.8	10423.8	11368.5
POS	M99T26	98.9947	25.9155	3375.52	3792.13	4098.13	3867.19	3575.01	2518.16	4153.22	3523.2	3571.65	2474.08	3831.05	3295.37	2996.62	4913.91	3938.87	4793.69	3792.03	2887.76	4147.86	4089.42	3522.29	4769.1	3729.82	2884.61	3935.62	2502.52	2673.59	3843.64	3427.07	3395.13	4313.16	2331.3	3885.76	4867.03	3643.9	3377.9	2563.71	4300.33	4035.81	4102.95	4129.37	2665.4	3482.26	3487.33	3263.84	4055.16
POS	M99T79	99.0418	79.2875	5093.35	810.689	2195.07	7099.25	7569.74	5468.75	8188.54	5793.09	4578.61	2363.69	7305.3	5503.85	718.795	8072.84	8258.4	5856.22	4372.09	3347.93	2240.93	4930.99	1974.45	2422.91	7133.89	12464.7	5007.86	3590.89	4213.66	4493.11	4508.68	1160.32	3347.24	2923.42	8250.88	5571.86	4680.19	6287.46	3532.68	5690.95	6500.65	4079.93	6135.31	2774.42	4289.69	3026.4	5302.94	1335.22
POS	M99T316	99.053	315.861	7820.49	8457.38	4099.51	7550.6	6011.28	5981.18	4865.63	5770.16	5295.52	6144.35	3263.68	4192.64	3705.41	3436.26	3921.96	3316.48	5430.44	4518.78	4569.28	3772.14	4111.32	3984.7	4090.93	3448.74	4970.93	3140.64	3534.57	2528.65	3881.99	2738.5	3766.22	5146.4	8064.91	4168.82	6186.68	3737.21	4324.33	3569.21	3838.49	2519.87	3815.73	5087.64	6734.25	3350.99	6825.88	4479.07
POS	M99T24	99.0658	24.103	1139.59	1554.06	1636.79	1168.52	1525.7	926.553	1293.58	1415.06	1762.29	2931.59	5509.55	1178.37	1726.94	1373.77	1874.48	1538.17	1428.76	1511.77	1307.89	1519.43	1626.47	1585.39	1730.36	1235.09	1594.1	1409.48	1442.61	1470.6	775.679	1904.38	1573.85	911.413	1369.19	1308.82	1159.78	1501.08	1243.13	1393.34	1721.4	1460.03	1376.98	1577.85	1523.88	1348.25	953.401	1279.99
POS	M99T38	99.0891	38.419	48639.6	1448.84	38191.2	20513.9	3109.28	39529.6	19414.6	13971.9	25167	4657.91	2247.87	2695.08	12620.9	9181.47	3628.41	4537.67	4121.24	3860.3	3132.32	1342.92	3259.48	4212.17	5283.07	1274.93	2820.92	1045.97	2905.48	2681.15	2467.89	3028.44	3471.94	1928.58	2030.1	20205.9	23363.1	4027.03	10368.3	4102.68	3002.24	3083.19	833.453	12140.2	27235.2	7089.85	34066.7	2002.91
POS	M99T288	99.0896	288.411	8157.78	10633	13280.6	11017.6	6289.76	8632.41	12130.3	14381.1	7047.03	7167.48	3247.7	8858.42	5448.52	6311.82	5777.06	6807.33	2939.48	10168.8	4230.57	3659.89	2373.99	4500.87	4674.83	4258.64	4320.05	3881.15	3112.58	3984.89	1862.52	2421.32	3909.97	7859.29	6510.16	7916.23	10727.8	6044.69	6472.11	5023.57	4672.24	3113.5	4117.96	13828.6	6939.43	4075.35	8517.38	5032.44
POS	M99T74	99.0896	74.4045	11647.3	1944.06	9073.68	4911.15	3314.19	6528.85	5538.55	3981.82	5169.59	1007.58	2836.48	3323.06	2655.61	2485.7	4677.05	3092.82	3376.36	3285.35	2092.65	4135.26	4396.89	3921.17	4191.33	4072.42	3319.23	2211.48	3589.08	2602.88	4654.45	4082.1	3987.14	1932.15	3487.91	5139.02	5528.45	1170.86	2716.15	4662.44	2827.26	3171.96	3398.66	3107.52	5980.43	3269.59	5821.83	3906.86
POS	M100T216	100.02	215.695	10688.4	31172.8	5272.99	36945.9	12384.7	22297.1	22779.6	8336.19	6583.62	31531.1	44831.4	41860.9	36469	81915.1	14272.7	35353.1	27372.4	16807.7	39095.9	42687.8	42973.3	38452	38620.3	31008.3	42137.8	27320.3	41684	19224.9	39686	14245.9	21312.3	22113.6	67945.4	23650.4	12359.1	16747.7	12643.1	23098.9	35287.5	31352.4	20722.9	24624	23348.3	28929.3	27925.8	38639.1
POS	M100T316	100.037	316.096	2495.74	1815.15	2154.89	3258.89	2563.09	2072.92	4737.75	2413.37	3733.85	2861.22	2875.77	3099.52	2718.81	5304.85	3112.94	2524.91	4878.82	3851.98	3199.32	3459.84	2585.12	2872.11	2646.65	2589.09	4903.88	2389.7	2369.08	3106.27	6466.37	2398.37	2945.83	2939.55	4913.75	2981.49	2380.51	2604.07	2160.53	4593.56	2186.59	2084.75	3864.57	3185.02	6119.81	3161.42	6547.52	3323.43
POS	M100T191	100.048	190.65	1348.97	945.592	1092.71	927.912	818.032	1801.07	894.568	814.777	1019.21	1656.26	984.839	1038.64	932.266	730.64	1115.92	624.591	831.648	1159.72	782.61	1009.93	1585.47	2452.02	1848.15	1530.46	1246.2	916.217	1091.83	1017.4	1856.94	1384.28	1964.78	1351.04	832.944	1286	1293.02	905.067	733.705	1576.13	736.515	1004.4	962.817	991.713	832.973	1130.56	1537.16	918.518
POS	M100T49	100.074	49.494	492332	224699	1.84756e+06	307950	3.12438e+06	2.64354e+06	613648	473897	934629	1.38314e+06	1.95271e+06	538559	592779	298631	381207	306415	401801	408159	322732	917404	1.72598e+06	1.68741e+06	373647	5.02719e+06	750829	416104	670630	471205	624315	1.04027e+06	2.13198e+06	494707	300673	173517	210135	313845	1.96462e+06	499466	850640	537909	2.23441e+06	2.86287e+06	461336	4.32901e+06	729076	768552
POS	M100T290	100.073	289.514	41203.2	15245	19482.4	53981.8	46811.7	59015.1	112454	71875.5	145555	145334	30232.6	37258.1	31493.2	67167.2	14393.3	75181.9	49035	14620.9	11304.4	53655.7	10186.1	32409.1	31031.3	38934	19516	7629.49	58285.8	14541.4	30453.4	43884.6	26402.7	38976.2	49970.6	74714.1	29145.3	52198.2	37271.3	27925.1	11617.5	54193	15245.9	17439.9	33473.1	46535.1	16758.1	25614.8
POS	M100T25	100.086	24.844	30400.2	31366.3	33275.5	36609.9	30474.3	23164.5	34649.7	32898	36052.6	27736.3	38049.3	29686.4	32705.3	39452	39588.3	38138.9	34643.9	28625.5	24691.6	38211.1	33989.2	40202.1	32425.5	28609.5	37568.6	22555.5	28918.2	38215.2	34796.2	31414.6	36931.8	21583.9	35055.4	32667.2	35074.2	32492.5	23273.7	37209.5	34874.3	35336.8	36665.1	21245.7	30111.8	29776.5	27608.2	33377.3
POS	M100T46	100.11	46.063	18131.1	20670.3	351946	22033.5	605581	501035	16141.9	23202.8	15523.4	15613.2	17295.5	9841.38	17758	24452.1	20641.2	20488.9	9802.2	10312.3	10365.3	17718.7	327276	13910.9	12126	964598	149577	9702.1	18255.5	19196	19839.4	18418.4	414230	19436.6	21033.1	23355.4	26170.3	26088.7	395572	19377.7	167459	15330.9	15756.9	14116.4	19460.3	14004.7	18328.2	16305
POS	M100T26	100.123	26.193	19478.4	21640.6	21524.9	18823.8	20819.1	20811.6	21687.2	22115.7	20959.5	20397.3	21012.6	20624.1	19408.3	20981.5	37969.3	21334.8	19617.8	25388.9	19775.4	22617.5	22056.5	20152.3	22810.7	20972.1	32834.8	20985.9	20661.1	30633.9	20112.1	21803.4	33586.5	18975.5	42296.9	21990.9	20600.5	23552.3	20845.7	19787.2	22400.5	20422.9	24077.3	18786.5	22847	21565.6	21135.7	23356.7
POS	M101T25_1	100.946	25.43	1474.06	1359.6	1599	1553.87	1493.59	1285.12	1507.06	1533.98	1435.53	1530.97	1643.42	1249.76	1376.09	1616.94	1360.79	1357.5	1468.17	1625.84	1532.43	1430.78	1552.06	1469.67	1395.66	989.335	1676.26	1073.99	1172.21	1730.28	1457.71	1438.56	1582.43	1249.89	1350.7	1428.9	1655.37	1537.92	1520.52	1369.89	1276.93	1304.01	1348.95	1267.1	1590.3	1543.28	1301.16	1466.29
POS	M101T318	101.015	317.762	17986.5	15592.7	23466.6	24060.8	7027.99	19329.9	27874.8	20037.4	40092.8	15848.9	23733.8	18294	27778.7	30453.9	18286	21623.5	13190.8	13011.1	14364.3	22896.3	23371.1	16724.6	30602.2	37422.2	23133.6	7550.9	5669.6	19745.2	31547.1	8421.17	7949.82	8445.88	47363.2	24191.4	35225	17860	6550.46	22277.9	23608.3	9688.85	37528.8	19597.9	37244.5	37518.6	47690.3	44796.3
POS	M101T216	101.023	215.597	477.207	1376.87	647.496	1794.37	784.281	913.428	1193.17	714.96	667.818	1495.14	2158.76	2342.87	893.038	3835.42	992.243	1560.21	1240.84	702.679	2371.5	2308.28	1816.85	1910.34	2273.13	1300.78	2036.74	1041.87	2174.28	571.125	1946.21	877.753	954.501	840.187	3168.59	930.256	804.705	807.895	522.864	1097.62	1604.43	1457.3	1039.44	636.051	720.722	1134.13	1400.57	2123.45
POS	M101T335	101.032	334.947	383.804	2059.96	865.279	609.635	639.44	350.84	587.951	966.73	1152.17	899.977	568.823	369.597	301.677	632.539	390.813	527.014	763.211	765.856	615.706	602.153	490.493	1330.28	524.606	430.781	827.072	667.438	590.626	330.659	591.879	351.36	727.057	400.793	2127.82	891.63	653.529	375.367	88.1292	795.324	631.094	264.951	316.783	729.396	111.461	369.638	521.759	614.496
POS	M101T44	101.057	43.646	1986.72	3317.56	2466.07	2546.8	44399.9	34032.2	1672.84	2213.74	21279.6	1536.43	28076.4	2547.8	4530.01	4011.65	3077.77	3324.06	2474.62	3959.18	5096.15	13523.9	22053	21398.3	6246.3	56267.7	10965.3	6518.95	9220.03	6567.1	9893.17	14948.5	25400.9	3674.17	140.498	3412.92	5196.88	4698.49	3177.77	7315.88	2442.44	7417.93	26295.2	3063.36	3660.99	48842	2792.18	11278.2
POS	M101T360	101.068	360.12	6681.13	14624.5	10272.3	13186.3	11380.6	13334.9	11750.6	9041.96	12581	21201.1	13802.5	12686.5	13878.3	11376	7892.04	4963.8	12475.4	11783	14007.4	12391	4972.18	14454.6	13504	10678.6	13551.3	20091.2	12837.1	10377.4	13064.3	8431.76	13306.4	16690.8	13715.5	13225	6918.75	6822.16	14179.3	13635.3	12796.6	12530	7135.28	14109.3	20954.3	13107.5	8029.9	8957.57
POS	M101T50	101.077	49.5515	19982	16659.5	86178.4	21381	157707	128739	32205.5	25281.4	61951.1	62609.1	107530	23917.2	28433.4	25356.7	11621.2	23802.6	31589.4	34836.4	10236.2	59433.6	84970.6	78135.7	27696.2	237594	39302.9	30766.3	32138.1	17302.9	35405.5	57961.7	111693	23846.8	23152.2	22670.6	6953.04	29052	83881	8361.92	52426.1	23076.6	98816.6	138898	14438.4	202688	38160.6	41524.2
POS	M101T646	101.077	645.672	334.68	769.151	671.782	605.938	639.391	218.862	712.989	564.373	770.911	469.723	942.577	510.565	551.765	869.752	662.514	728.063	716.334	406.641	245.728	896.013	810.954	444.213	729.57	735.512	346.41	623.177	391.775	465.874	709.327	826.702	567.498	547.639	752.777	829.442	754.106	1032.92	637.137	834.709	711.446	385.04	559.896	287.782	494.258	500.519	775.852	346.099
POS	M101T289_1	101.077	289.004	3999.43	2000.47	2814.12	4831.92	2788.6	2274.03	4860.22	2265.69	4950.5	3454.22	1122.19	1459.91	1186.61	3120.53	1037.59	1795.13	1285.8	1356.12	841.535	1156.55	606.326	1086.09	1499.42	959.149	1187	529.327	1488.91	608.809	1675.91	1779.96	1059.79	907.041	2203.57	2122.13	2649.65	1520.68	889.061	1022.96	1595.46	1152.19	1079.16	1927.16	2615.9	629.993	3230.79	1362.07
POS	M101T673	101.077	672.679	678.317	629.74	787.545	765.424	633.097	493.457	508.063	529.188	752.578	694.158	783.36	608.094	639.965	428.48	752.589	578.017	669.849	459.296	714.506	712.023	662.915	706.596	570.607	571.026	557.229	736.087	759.566	442.924	701.407	754.051	366.984	725.16	439.045	958.782	707.204	500.678	688.214	441.756	842.622	813.751	467.793	687.228	661.709	433.307	872.685	403.189
POS	M101T25_2	101.082	24.614	3940.1	4089.99	3924.63	4073.09	4229.93	4283.87	3987.37	3807.95	3674.16	4693.93	4102.98	4306.07	3825.53	4425.83	4105.3	3624.89	4781.53	5214.2	4525.78	3496.96	4048.75	4261.04	4093.39	3541.59	4039.02	4546.53	3420.39	3683.99	3985.71	4233.13	3886.92	4661.62	3963.24	3432.95	3884.04	3676.26	3901.37	3963.29	4098.25	3706.73	3585.85	3891.18	3981.1	3969.35	4116.33	4199.26
POS	M101T91	101.105	90.958	35478.5	2881.02	27267.1	52138.2	31720.6	49086.1	47818	29788.6	28277.8	12370.1	5865.24	25549.5	2455.13	32816.9	6533.09	35583.2	25757	35877.6	4309.58	4943.27	6177.11	3941.86	6954.04	5564.59	4845.9	4162.68	4576.16	4690.43	6051.57	5892.88	5679.01	29257.3	5251.72	32700.7	31397.1	40928.7	47655.4	6007.9	20205.3	3649.33	7000.33	30202	49649.8	5659.8	39084.9	5704.88
POS	M101T186	101.105	186.498	62950.2	1.26937e+06	40850.6	42802.9	31291.8	12759.4	35945.6	24831.1	14523.9	21780.2	1602.36	2241.7	1349.47	2210.79	1644.52	1170.24	2097.72	1470.5	1476.57	2697.07	1746.03	29088.5	2350.39	1522.44	2815.09	2204.81	1401.89	1398.94	2082.44	2173.61	1662.28	3071.38	1552.47	3550.62	3124	1992.03	3277	1836.45	1719.81	2094.75	1140.97	1243.74	2752.15	1281.49	1712.22	1521.67
POS	M101T289_2	101.105	288.603	3830.03	1911.5	2586.96	5151.14	2630.67	2269.82	5346.75	2324.96	1749.84	2033.02	1126.48	1325.46	1064.06	1813.54	994.031	1857.72	637.723	1193.73	876.916	1799.38	694.773	1368.23	1489.5	1162.54	1119.75	623.737	1917.28	732.265	1486.39	1859.11	1162.07	845.869	2399.58	1957.7	1735.2	1234.95	2666.42	1119.85	1390.32	1931.94	991.696	1891.29	2656.89	1041.76	2974.81	554.223
POS	M101T220	101.105	220.075	28507.1	418169	18835.4	16301.2	9742.93	5809.93	14369.7	15883.6	5743.6	12112.6	3671.82	4105.85	8465.96	4437.14	3998.4	3683.13	4165.53	4395.7	3971.15	4108.43	3994.03	27653.2	4357.68	4138.99	4192.62	3732.72	3758.04	3248.58	4057.45	4283.51	3882.2	4394.49	4272.23	4187.48	4696.38	3748.89	4319.01	4035.32	3735.87	4435.86	4134.87	3913.83	4442.07	4151.65	5025.57	3669.97
POS	M101T25_3	101.107	25.215	4630.91	1183.1	19335	4671.82	4819.51	1206.95	3598.76	4647.28	1453.76	4574.97	1863.01	1005.61	1449.5	4763.84	1527.89	4726.32	1433.78	4980.66	1504.71	4499.05	4259.22	1473.53	4651.45	4454.06	4278.52	5191.29	943.365	4515.38	4799.31	1627.42	1203.48	4459.46	1386.69	4345.32	1746.4	2543.92	4712.86	4641.95	5168.84	4025.38	4076.6	4286.79	4381.95	1211.24	4761.09	1687.69
POS	M101T26	101.126	26.098	1071.63	1251.77	1564.3	615.942	1349.92	1002.75	1487.72	1336.8	1988.06	646.543	1612.54	1157.45	1354.28	3677.26	3645.15	1414.77	1820.91	1384.66	1391.48	1452.74	1903.69	1500.06	2021.67	901.298	1200.85	1317.72	1256.54	2990.99	1812.48	1906.06	3286.45	1252.16	1364.23	1760.35	1517.85	1303.17	1229.51	1607.33	1088.71	1222.3	1920.75	1277.82	1252	1619.92	1292.81	1891.48
POS	M102T48_1	101.82	48.04	6698.92	6235.06	7025.37	5851.25	5875.67	7341.22	7617.36	6502.23	7570.95	7157.77	5740.95	6334.28	7334.8	6935.11	5878.46	5768.65	5064.4	6774.69	5306.93	7018.05	6554.01	5917.35	5561.78	4543.33	7742.47	5940.34	4352.75	6342.32	6964.6	6192.97	7749.39	8544.94	6208.05	6290.88	6887.88	9789.95	7813.06	4794.58	4781.79	4944.47	6326.91	7306.28	6234.67	8460.69	8507.56	9284.53
POS	M102T26_1	101.834	25.867	1963.63	1576.92	1999.45	1753.37	1589.18	1920.9	1763.19	1601.61	2000.5	2436.4	1740.7	1379.95	1539.5	2346.8	1389.46	2163.49	1701.08	2131.43	1461.03	1862.83	1571.25	2391.83	2060.79	1756.02	1444.89	1345.94	1688.93	1864.43	1812.25	2035.52	2156.08	965.591	2184.64	2192.9	2069.55	2130.65	2300.84	1603.62	1756.08	1350.16	1992.22	600.224	1402.15	2241.32	2128.5	1560.81
POS	M102T216	102.015	215.81	884.236	1496.56	237.951	1887.35	610.698	1046.91	1066.98	373.774	412.064	1505.73	2029.98	2155.04	1889.62	4046.73	614.794	1528.02	1456.45	954.626	1892.97	2151.76	1923.43	1959.53	2112.81	1371.92	2051.15	1351.19	2171.84	886.302	2064.26	668.773	895.856	1073.62	3062.92	1082.02	569.371	734.278	747.598	1248.59	1648.24	1505.74	981.171	1118.3	1291.92	1501.96	1475.6	2408.05
POS	M102T256	102.022	256.324	406.014	375.441	519.556	415.751	432.042	986.732	663.673	346.682	371.215	623.071	760.686	481.902	381.054	239.237	260.106	700.506	688.11	515.935	473.36	403.628	467.149	354.803	618.616	427.644	755.315	342.297	494.713	766.39	823.851	559.291	795.637	606.436	309.235	467.953	405.485	464.683	292.856	510.869	542.123	392.741	458.232	599.294	513.117	469.686	836.651	507.195
POS	M102T240	102.044	240.001	12767.3	15773.8	13897.2	15441	13694.1	11315.2	15601.8	10878.6	9814.8	20828.6	17993.1	13305.3	15781.7	12606	10254.5	16324.8	11563.5	11349.5	14086.2	11119.2	13705.7	9499.19	14242.2	14147.9	14143.2	10118.1	12532.8	12482.1	13689.6	14339.6	16922.7	14476.9	22473.8	11731	10892.9	14093.8	12389.2	11818.2	13857.4	13122.9	14776.6	12877.1	14573.4	14934	12776.2	12682.4
POS	M102T267	102.035	267.183	3412.64	3120.59	4236.79	3471.47	5671.81	2341.96	3330.17	4715.32	2295.84	6038.36	5376.59	5075.42	5225.92	6121.91	4289.64	6072.43	3313.32	2780.23	3934.83	4785.59	3604.59	3663.55	4805.88	3457.99	5483.08	2744.94	3093.15	4446.86	5734.37	4409.66	4549.48	4901.58	5322.19	3862.48	4134.61	6631.55	3131.02	4573.92	4575.11	3860.54	4799.8	3034.71	5365.01	4749.8	5268.47	4170.97
POS	M102T377	102.053	377.163	63137.3	28483.4	47816	62917.7	58816.3	53996.5	55211	64448.3	44101.2	48588.3	46625.8	56310.7	67002.5	68192.1	32235	50320.8	50541.4	56810	48454.5	41278.4	41639.4	40488.9	43921	32128.4	41912.5	29813	40669.1	32589.8	34196.9	35896.5	24926.7	63185	34485.7	46474.7	52900.8	63543.2	52127.3	41737	59512.5	34412.6	34635	64428.7	52748.3	32695.3	63371.6	50081.5
POS	M102T290	102.053	289.671	51542.9	6874.84	40321.9	65059.8	29953.1	50502.6	51185	40172.4	40867	47545.8	6174.8	32688.8	6412.75	41537	11550.1	32029.8	61018.8	34900.9	7096.78	8394.69	8015.16	6050.42	6332.19	6142.38	12241.4	3946.04	6963.79	6479.32	7606.01	9633.83	7015.73	36621.3	6677.23	37902.3	40223.5	34276.2	44782.5	8495.7	33159.5	9888.58	8280.73	28863.7	47566.7	6423.41	37295.7	11638.2
POS	M102T435	102.053	435.156	76191	55985.7	116861	75879.4	61920.7	100251	78868.3	73728.7	90454.4	28831.3	90542.3	71669.5	60429.6	87396.6	81288	83932.6	114033	59965.7	106083	72847.4	86364	71413.8	83965.6	74111.6	89966.8	31740.4	131742	83117.7	75025.5	135691	95972.5	57288.8	89066.1	87598.3	87200.1	191920	61983.2	134919	72204.1	80508.6	85467.3	65156.5	79926	79444.4	73049	150528
POS	M102T565	102.053	564.739	275125	293756	323909	331063	262005	291996	408139	327694	154405	253043	358959	335035	403952	309947	339207	324390	333219	202179	358498	350446	359920	368706	368913	416275	350185	195694	374236	377134	372833	267716	355856	312947	404160	343184	366751	351779	307146	357940	366953	169104	312397	285004	347279	345183	341136	327281
POS	M102T493	102.053	492.537	150450	157923	124593	141147	105120	101656	140066	105834	101754	78240.8	135900	107725	128613	184352	141164	128769	111704	125742	98818.7	128508	120018	161231	139058	137741	153202	74163.1	137678	176337	127864	132232	130071	90946.8	102600	147014	158895	165736	91531.7	146592	145735	123645	110712	96078.4	136637	114339	132987	150942
POS	M102T339	102.089	338.748	212257	212155	210943	233480	224969	211845	198240	199021	195171	232292	201504	221923	249307	219576	166587	211379	197255	182538	191948	188360	184654	214197	226896	209233	182162	194406	162342	204729	193323	187648	203527	191876	212993	189130	199840	195765	164828	186057	197011	197068	202566	225871	225449	212049	202552	200453
POS	M102T186	102.109	186.477	3005.87	53752.4	1908.53	2166.07	45573.9	659.478	1723.83	1110.54	832.166	50074.8	39314.9	47176.1	44285.5	43312.2	42219.9	39965.9	44159.6	49961.1	43416.9	33752.7	36786.5	1268.95	35278.7	33831.9	31123.4	47750.6	38898.6	43671.6	36193.8	48601.8	31348.5	49706.3	35703.1	28401.4	46433.2	45955.8	43205.4	38141.4	37350.1	40737.7	46631.1	43438.7	46578	45926.4	41291.3	38403.6
POS	M102T661	102.126	660.928	130306	135026	335447	41148.2	79875.4	221735	124359	77918.9	376056	171276	120271	46887.1	130635	148500	51986	98394.8	158706	340821	125575	200122	160631	90585	108530	25387.6	209332	109297	82166.9	112088	402049	239650	109481	376767	91396.5	235278	337736	143284	293176	87568.7	141163	116993	153918	248223	177424	142639	110773	71741.1
POS	M102T691	102.126	691.441	515281	201322	476736	33671	318583	218381	298543	304830	215748	254414	225527	233149	391830	169913	282796	166762	332916	84886.3	272311	289826	235629	386694	420332	900406	357649	204150	232383	997080	143852	177512	271510	289541	317657	220707	195263	175911	204164	238258	171260	156958	480100	381847	419782	404443	227868	167922
POS	M102T716	102.126	715.746	118720	91191.5	699578	149941	311086	184177	212733	399881	734261	230463	140537	362809	471639	13282	175858	35094.2	231570	165452	630527	302225	169834	206904	93630.9	313101	169081	248733	292227	96185.8	723796	545048	270885	397670	143138	327784	263592	393670	278683	121875	29803.5	450952	287268	425102	142508	171259	397039	496668
POS	M102T621	102.126	621.039	128973	577457	197069	213103	442702	361627	382877	304205	226435	444155	82832	435128	471102	311655	511309	559594	392001	350551	153522	435189	440511	329117	438319	594730	513363	84555.3	57906.2	466224	653982	441733	509994	186678	49191.5	491443	231851	166564	323111	270116	314886	486518	204513	636814	71286.6	86895.9	468166	451012
POS	M102T48_2	102.126	48.303	3.6572e+06	2.68066e+06	3.40299e+06	3.58189e+06	2.83048e+06	3.99129e+06	3.59597e+06	3.31463e+06	3.49958e+06	2.60803e+06	2.16596e+06	3.17215e+06	2.47508e+06	3.44586e+06	3.27913e+06	1.95323e+06	3.40898e+06	3.97364e+06	3.02982e+06	3.58938e+06	3.18586e+06	3.37998e+06	2.37198e+06	3.17756e+06	3.55436e+06	2.75227e+06	3.77656e+06	2.24054e+06	3.62554e+06	3.46437e+06	3.61718e+06	2.32508e+06	1.74052e+06	3.4337e+06	3.62877e+06	1.95869e+06	4.01107e+06	1.98005e+06	3.17443e+06	3.5682e+06	2.27797e+06	3.39301e+06	3.1515e+06	3.07823e+06	3.58636e+06	2.25303e+06
POS	M102T17	102.126	17.3145	857344	440820	629672	792622	889937	967152	776170	599341	653845	337651	883641	1.01023e+06	972166	728190	600770	697008	912810	884319	941208	670873	638032	455907	622404	692754	715505	1.04595e+06	739393	547093	610313	753793	737524	893691	502803	595604	730262	671407	1.08814e+06	511556	708785	761114	373688	610235	644004	630585	675483	821386
POS	M102T138	102.126	138.255	2.30518e+06	785201	2.49157e+06	751113	2.42878e+06	2.56806e+06	2.08048e+06	2.7747e+06	2.36165e+06	3.04119e+06	669557	2.48543e+06	2.37226e+06	2.16114e+06	2.14523e+06	2.07771e+06	2.59805e+06	3.41434e+06	2.58549e+06	2.27177e+06	2.17158e+06	3.47431e+06	734296	1.88909e+06	3.40223e+06	981996	755926	2.26161e+06	2.02651e+06	2.07053e+06	2.26299e+06	3.65347e+06	683544	3.23999e+06	1.9361e+06	2.14417e+06	2.7435e+06	566537	3.10201e+06	2.41446e+06	2.12554e+06	3.5035e+06	1.8963e+06	1.85826e+06	2.19193e+06	2.16612e+06
POS	M102T4	102.126	3.607	323176	725773	680796	695323	738637	685188	310813	753371	653331	827862	150541	401017	746463	134913	659310	697101	762640	756067	675321	680048	684621	701570	673549	635221	680210	901739	735710	682882	605271	619341	680124	807172	675165	667445	651105	672971	510548	693488	654724	737640	695376	822226	662960	680563	754128	696043
POS	M102T122	102.126	122.039	758865	640691	802697	800916	805219	1.2282e+06	638574	862117	721441	979883	872636	836548	807555	729870	778665	812577	869367	871643	818745	731031	726794	829030	889745	715937	772248	1.83746e+06	802528	763806	760573	763573	776628	938478	814379	764279	888454	724545	901364	839777	742717	793139	811687	837378	817630	741530	750258	960002
POS	M102T26_2	102.139	26.051	560882	584602	533456	563175	618973	579063	551967	575175	551125	741160	555456	589798	604761	611500	603717	569071	611546	647689	598974	567550	566446	559438	558910	490809	596971	770452	577215	602183	510477	543282	605990	649358	558077	563459	552748	552106	650680	579939	550252	592139	614559	585664	550223	554850	532842	566005
POS	M103T240_1	102.744	240.154	1085.03	1015.91	576.972	1089.64	1229.44	993.041	762.337	551.455	888.241	1428.24	641.75	1311.7	525.076	1041.83	914.784	1485.82	710.463	468.564	828.97	829.103	430.183	786.448	1058.11	849.755	841.485	819.527	892.702	1029.59	1021.3	866.608	888.93	1035.34	1072.53	967.4	883.65	667.325	898.969	1041.2	1039.78	989.132	965.815	915.863	1051.03	438.573	904.169	1363.62
POS	M103T25	102.943	25.373	990.891	1093.62	1166.64	1117.67	1142.06	1001.13	1104.12	848.134	1102.12	1060.57	1158.41	955.176	1232.3	1064.43	874.375	930.227	1010.66	1065.01	1221.89	1072.54	1098.24	1031.53	1009.05	1382.54	1258.48	1183.66	905.918	1186.77	1091.77	1101.79	1133.97	952.97	1237.05	1078.23	975.024	1159.53	980.298	1088.5	1034.84	1125.43	1134.75	1037.06	1113.56	934.977	1015.06	939.436
POS	M103T339_1	103.037	338.746	280976	272228	299167	322136	301314	294638	273593	289545	264300	353810	280321	333255	300558	291682	264394	297117	287805	258048	267382	270642	258976	285627	297567	266639	274354	281917	247168	265227	285517	263745	330255	255581	308473	267055	282234	274823	232768	262295	282412	269638	304550	324820	312901	287925	253771	311057
POS	M103T234	103.037	233.863	7620.27	699.31	5382.82	4624.2	4695.54	4287.66	4287.62	4649.79	4259.09	3710.45	625.763	9193.71	10030.5	6744.84	6290.23	7992.56	5888.56	5908.59	1237.24	865.309	985.78	510.634	701.814	606.641	789.276	1878.94	1055.32	680.509	751.041	864.933	827.95	8615.84	727.967	7412.5	4305.3	6900.92	6427.49	906.003	4705.91	605.251	848.818	6341.26	10037.4	790.908	6649.59	722.171
POS	M103T240_2	103.053	239.943	245732	323289	316979	313224	275092	247953	285137	230922	225157	419783	354294	285482	315341	259122	217899	347528	250429	249260	280144	218805	261095	190826	254427	271548	286310	199728	251468	286763	274117	277592	338331	267692	448043	231822	225925	287075	269766	231619	270285	263925	317115	245167	273249	287513	283161	265879
POS	M103T377	103.056	377.045	2995.83	1105.24	2535.42	2784.89	2326.12	2152.38	2431.84	1712.73	1708.53	1594.77	1469.89	2285.24	3204.25	2581.04	1168.11	1799.87	2011.1	1887.9	1487.86	1640.18	1652.28	2159.39	1730.98	1259.95	1864.24	853.883	1124.2	1208.51	2007.52	1702.4	825.82	2543.86	1548.9	2454.09	1945.04	2386.26	2069.1	1944.2	2683.66	1298.5	1329	2413.36	2101.03	927.729	2587.58	2496.91
POS	M103T235	103.073	234.553	69.5474	3165.42	3568.68	51.6175	51.2718	43.2867	73.7327	3163.09	52.743	84.3148	1132.42	92.9069	100.783	87.8193	111.942	92.1698	70.5312	71.0116	3323.07	4894.92	2739.75	1605.51	2894.75	2783.85	6690.46	1523.32	1990.25	469.277	4232.47	1214.47	8896.07	101.512	9155.58	66.9067	1749.27	112.411	87.8744	1226.85	132.28	3003.04	2251.39	77.1739	97.162	2905.02	2040.39	2243.49
POS	M103T45	103.073	44.5915	42189.7	132611	21465.7	28327.1	38485.7	29648.8	29591.7	19762.8	20937.6	15245.5	18529.1	29236.8	31228.8	28816.1	31087.7	33848.7	22855.8	26942.5	14060.3	14118.2	16404.2	16476.8	21292.7	16651.3	161730	226331	14508	10538.2	15006	15432	16617.2	24875.5	15868.4	24163.7	16900.9	26711.4	198715	166267	25953.6	13995.7	13944.1	23587.9	23058.4	15324.3	21407.1	15186.4
POS	M103T182	103.085	181.765	1662.89	3343.04	2738.8	1017.4	3627.75	2401.41	2874.04	866.08	1042.69	3370.43	2787.72	3398.84	2718.99	4023.59	3163.3	3103.93	3480.72	3744.19	3317.17	3192.4	3714	3380.93	3616.99	2857.24	2759.53	3744	2819.59	3021.99	2981.4	3381.43	2642.76	3173.74	2564.16	841.781	814.277	3214.17	3304.26	2773.55	2963.33	3746.11	3189.74	495.1	3555.35	3488.59	936.918	3165.46
POS	M103T339_2	103.092	338.745	8714.48	6368.81	9084.21	9157.49	6595.03	6007.84	8599.36	5487.68	7816.2	7289.8	7017.59	9594.36	8930.51	4315.26	6618.86	5407.36	9735.65	8542.96	6093.59	8379.7	6350.59	10005.4	4352.41	6768.12	7756.47	9184.54	6892.46	8644.55	7808.75	6292	10778.8	6572.79	6748.6	5524.26	9911.15	5351.12	8175.72	8191.66	8095.21	11887.1	9416.92	8537.9	6695.57	5491.8	8963.18	5649.5
POS	M103T707	103.129	707.111	14044.9	34416.1	12088.5	15515.6	12863.9	14089.4	44087.4	12042.1	9625.18	55013.6	44052.3	14401.1	10620.6	13778.1	12570.9	15854.7	16250.2	11317.2	12328.4	14825.3	13984.6	27537.4	14465.1	16867.9	17623.7	13308.6	2952.77	22087.2	36609.7	10403.2	23715.8	28057.9	14685.4	15571.2	46925.5	9721.84	6107.12	16570.7	22836.5	11721.8	17309.9	10894	13066.5	54578.6	27858.8	32300.7
POS	M103T665	103.129	664.5	16412.8	2211.34	24690.6	15350	9776.4	8894.64	8869.14	14954.5	21021.7	12768.4	17269.7	9952.46	13375.2	17484.1	11874	13814	9608.39	11256.8	14925.6	7907.31	14920.5	12311.2	15919.2	8293.06	5559.45	51295.2	9668.52	11177	10923.6	19993.2	11049.2	22582.1	27139.8	31993.8	30703.4	13831.9	22513.7	6982.7	3505.16	17684.4	14839.3	12026.8	11215.1	9802.29	1570.68	8474.29
POS	M103T622	103.129	621.824	1320.32	1361.47	228.461	242.096	4523.22	8196.44	1394.57	350.354	193.918	2945.3	206.202	1935.09	3626.81	2327.46	15214.2	2617.6	6253.45	8777.9	1307.99	3356.66	6995.13	4723.28	1579.38	1006.36	7321.61	4904.81	3496.47	301.556	4576.98	2581.18	9359.99	4772.2	6582.04	3914.3	753.739	1441.15	328.018	5451.67	7493.6	2640.36	9768.71	4356.81	1098.02	7811.97	1278.9	5671.38
POS	M103T48	103.129	48.468	225276	172066	220811	219048	133058	216828	224571	122759	199560	260709	122746	126478	229199	213033	204972	117244	199442	166106	245896	220646	216011	220419	212619	113675	138034	272249	212738	218681	223414	239485	216615	136474	174147	212972	226381	122439	214777	213712	196248	203577	223056	200961	179425	191289	219669	230107
POS	M103T26	103.142	25.9715	33800.3	36357	34782.9	36338	35383.5	34997.6	33162.2	34125.2	34376.7	41685.6	34848	34556.6	35309	36102.7	35596.6	36055.2	34996.7	38887.9	34727	34655	36044.4	34019	33621.9	33595.9	33999.2	43659.7	34351	30746.7	32194.7	32132.7	34673.4	37593.3	33008.4	33281.1	34138.5	34556.2	38231.3	35239.1	34616.5	36444.2	34424.3	34218.7	33667.8	33264.6	32407.1	33982.1
POS	M104T274_1	103.794	274.146	19886.6	14341.8	20694.3	28380.5	13545.5	11028	19170.8	17592.8	19140.7	22578.1	17014.8	16429.1	17187.4	14846.1	17160.9	20983.8	18626.8	13649.1	20623.9	18776.6	16900.3	12155.9	11322.9	18163.7	19559.8	14218.4	24769.4	18053.9	21282.9	12022.1	25861.7	6506.26	20372.3	18084.7	16327.6	18306.8	22171.5	20275.1	19526.5	13291.9	13338.1	12355.2	21754.1	22110.2	20053.6	7239.71
POS	M104T28	103.967	28.264	4626.23	1110.39	1979.86	1670.77	333.372	3417.99	2591.41	1497.13	4974.75	5351.62	1291.66	802.507	1404.92	1035.75	194.039	838.863	1085.12	1693.43	597.876	123.757	437.421	404.316	953.731	1550.07	660.554	1718.6	184.087	294.874	787.183	341.87	252.511	697.97	357.001	14054.7	3999.41	691.168	3127	1000.72	256.7	674.613	3123.18	10354.3	3586.89	5488.87	5680.17	5519.59
POS	M104T339	104.04	338.933	10249.7	11216.7	10028.2	10036.7	14105.5	9715.14	9021.47	14570.5	9711	13330.6	4840.04	13472.5	8635.18	9942.01	13070.6	9000.07	10492.2	9457.62	10160.3	9019.63	11164.1	9011.32	13850.8	8141.95	9690.43	9629.51	8450.13	10603.5	7739.57	10987.3	12128.6	8133.85	12053.7	11935	10663.2	7271.61	10940.1	7821.87	10450.6	9564.67	7808.1	14158.2	10580.2	6350.37	8709.77	14518.7
POS	M104T87	104.043	86.682	6285.87	147.453	6460.56	6260.44	649.382	6090.34	7487.16	867.863	12646.2	3346.67	1644.92	1848.14	9341.16	8659.07	286.74	2008.23	747.722	641.183	504.127	1184.97	3294.54	1164.17	2490.29	4552.48	2200.08	1275.79	220.429	435.096	3881.98	300.491	571.961	513.627	923.222	6069.77	6602.82	1461.92	1888.27	4114.62	434.599	643.079	11919.7	9515.71	8200.96	5725.06	8540.37	10027.8
POS	M104T266	104.051	266.452	6952.8	4829.56	8196.21	6653.2	12286.8	4459.96	3436.88	6945.61	4194.86	3013.38	6750.59	11117.6	10236	12592.6	4402.78	11618.9	6028.24	2.758e+06	7851.68	8622.33	5456.22	12057.8	17353.6	5127.05	9350.52	1996.83	4586.04	7343.6	11344.1	7330.35	10924	10091.5	9465.77	5138.46	5689.71	9939.82	6987.12	11009.3	8379.91	5863.29	8278.73	5883.61	9309.75	7139.56	7264.92	5430.8
POS	M104T240	104.055	240	23478.7	28512	28706.4	28119.5	25269.2	23089.8	26390.4	22057.6	18840.4	33714	30207.3	26994.5	31720.7	25617.1	19652.7	31435.2	21776.9	23282.9	25596.2	18767.9	22845.9	16598.8	23593.4	23254.8	23789.2	18529.3	25299.5	24297.9	22756.8	22397.5	30927.7	25256.4	37739.7	20140.6	19603.3	23340.9	24756.3	21358.3	24703	22616.2	25662.9	22435.8	23568.1	24881.5	24863.6	24424.6
POS	M104T25	104.061	24.6395	1385.11	664.417	1258.42	670.134	905.001	1056.96	1303.64	1310.28	1035.79	1808.23	1139.9	1086.25	485.21	1227.7	510.966	984.719	837.237	1112.34	1312.37	935.406	595.004	907.418	1003.88	916.939	849.962	524.053	464.345	1418.11	1113.25	1343.2	979.636	534.563	442.09	1163.98	503.075	529.358	795.546	954.113	791.82	759.439	764.375	976.805	1314.89	1203.04	961.597	638.079
POS	M104T290	104.068	290.293	39233	30947	45546.6	51091.6	48309.7	88809.5	48347.2	56675.2	41220.4	54623.6	40285.9	46222.3	655241	54621.4	72366.7	49060.1	53023	96100.3	46946.3	64334.6	41412.7	41171.8	39035.6	39753.9	40783.3	34959	51877.6	41521.4	34298.6	22588.9	45740.1	53395.1	49541.9	44089.3	53489.8	36499.3	49239.4	52402.1	43675.1	47975.6	55743.1	62493.1	33290.5	56764.2	41404.6	48284.5
POS	M104T321	104.068	320.868	2573.23	2195.59	2890.96	2467.74	27617.4	42448.6	5994.32	3281.21	3133.22	4459.13	33148	18790.8	26215.1	16837.2	5553.01	1416.29	9809.48	3680.87	24521.2	1050.84	12001.6	3631.59	4113.43	2046.2	13505	3616.31	27914.2	13009.4	1436.68	1867.41	765.609	24487.4	44159	36119	2784.84	20278.8	5885.72	1394.48	34533.4	1362.83	27265.7	2177.83	29751.8	22300.3	1932.52	3281.48
POS	M104T308	104.069	308.34	50750.9	2361.6	49548.3	7997.55	4389.87	72653.5	19197.2	6176.27	2344.59	3132.53	2696.69	6317.44	40563.4	1653.81	23121.3	31216.8	52278.1	64058.3	12876.5	2058.73	6458.29	4253.14	27780.2	25887.6	28010.9	3524.58	3536.18	35012.4	30877.9	29846.8	5609.19	26238.4	30953.2	48881.8	39776.4	19061.6	31111.3	28274.3	36907.9	4456.35	5399.15	6032.37	4786.24	43153.6	26093.7	7838.79
POS	M104T71	104.068	71.463	1319.87	909.486	1733.03	3182.16	2170.06	2245.26	2957.98	2004.63	2840.56	1187.08	1137.64	1571.21	2763.13	2791.21	1930.27	3849.38	2723.25	10987.1	1071.8	2544.15	8301.01	1491.42	1640.14	2696.66	1890.08	1104.45	2171.18	2812.33	3877.27	2234.78	2300.84	1770.48	1890.7	2054.44	1026.59	4936.78	6529.76	5930	1277.68	2005.31	11354.5	1887.96	2005.69	1993.79	1654.97	2277.9
POS	M104T45	104.068	44.6405	3090.8	2390.23	2891.97	3028.64	2741.93	1089.97	2338.97	3419.43	4265.44	3330.34	2499.61	2987.2	3682.26	4433.64	1803.97	3460.36	3384.05	1713.61	3712	3811.17	2271.47	4179.01	2620.9	2726.29	2422.66	4015.79	2128.38	3359.52	2501.3	3150.48	3844.47	3622.56	2828.15	4024.08	731.315	3255.9	3782.61	2601.8	3287.18	4325.25	2574.2	3871.36	3805.37	2540.87	2962.41	2632.96
POS	M104T274_2	104.105	273.916	7.47747e+06	6.52914e+06	7.85079e+06	1.02066e+07	9.87342e+06	1.38898e+07	8.45286e+06	7.69433e+06	7.99755e+06	9.78272e+06	1.23182e+07	6.87648e+06	5.9862e+06	4.27783e+06	6.76739e+06	8.28291e+06	7.56574e+06	6.15526e+06	7.85652e+06	7.00685e+06	6.80619e+06	6.39214e+06	6.52908e+06	8.47015e+06	7.82225e+06	5.89007e+06	1.00896e+07	6.56939e+06	7.41196e+06	5.36424e+06	9.30584e+06	7.2761e+06	8.60855e+06	6.87508e+06	6.46244e+06	7.2688e+06	9.66131e+06	6.94355e+06	7.37346e+06	7.42444e+06	8.93229e+06	9.7393e+06	7.70217e+06	8.53038e+06	7.21582e+06	5.50646e+06
POS	M104T370	104.105	369.695	105510	108421	152762	150427	190411	163543	142744	144861	163020	122045	231880	194905	246071	259950	282713	267741	231315	185935	197717	203871	210006	189847	263044	232192	193705	173337	202734	169670	222096	170941	228794	192080	133910	189408	257878	262599	211375	244596	210783	164104	220230	230752	237022	246682	226741	190624
POS	M104T302	104.105	302.139	286868	334736	314584	1.13423e+06	303101	465927	251680	257484	275438	469353	430123	256152	277414	271813	205894	280128	241237	189219	305550	276454	268129	277373	916721	259505	332799	266343	388765	244878	333269	201220	428349	269881	361667	294941	212525	235561	297348	261657	277717	274326	293624	342439	277111	259190	272359	203991
POS	M104T174	104.105	174.147	37102.1	43705.2	41258	47531.4	56620.3	33186.7	40719.6	42899.2	47627.7	75492.4	44060.3	81764.6	50117.1	53086.4	43786.8	109961	43844.5	42328.2	47541.3	89165.4	45226.6	34862.5	90377.6	48092.9	42069.7	42255.4	41827.4	39886.8	55261	36150.9	75545.7	44159.5	45032.3	46675.4	45047.9	39433	38883.8	40716.7	33446.4	102779	49546.6	113962	79212.3	55783.8	49489.4	86638.3
POS	M104T48	104.132	48.256	7031.57	2580.77	3334.31	3889.91	900.016	2698.62	4168.93	413.425	2790.06	2700.43	3290.75	3218.12	4649.22	4457.89	2294.5	1386.59	2345.77	3440.4	3173.67	3528.62	3297.4	2916.75	1693.56	2942.49	1560.88	2786.25	2325.89	3441.84	3410.57	3239.75	3155.13	3275.38	2701.61	3970.43	2357.83	3334.29	4232.34	3158.15	3476.75	4217.35	3401.5	4089.38	2394.65	2800.81	1925.03	4197.43
POS	M104T26	104.146	25.641	837.137	776.165	928.835	825.291	1253.02	737.524	905.266	1016.31	621.856	1772.02	1168.96	742.764	716.549	792.769	846.939	796.062	1086.11	1088.32	987.297	855.757	755.283	720.422	794.528	1309.67	863.915	866.948	727.959	764.958	828.959	1585.03	1150.61	881.004	560.805	1072.75	762.071	768.194	1155.44	923.672	871.126	995.517	1068.11	869.413	685.384	667.64	1233.07	800.199
POS	M105T351	104.677	351.465	3581.89	2738.51	2501.89	2845.62	4903.74	3601.36	2222.17	4816.8	2143.94	2272.18	2746.77	2594.79	1654.97	2306.39	2230.76	2513.15	2919.99	2485.84	3888.48	3142.04	2909.99	1507.38	2476.09	2320.04	1824.35	2056.08	1524.74	2034.08	3159.4	4170.98	2803.73	3519.45	4065.17	1824.92	2392.42	3214.55	2793.32	2721.81	2550.34	3187.6	2833.02	2942.99	2831.93	4429.95	3538.99	3054.34
POS	M105T273	104.795	273.223	1929.82	1498.37	1705.65	1950.82	1702.79	2676.75	643.12	1241.21	1088.55	2379.07	2061.7	1288.44	1494.47	1327.86	1180.09	496.154	810.154	1046.81	859.205	1428.14	1470.67	1779.01	765.057	1544.56	1774.11	1034.62	2312.74	1656.17	571.272	1388.4	2020.59	1414.05	1845.64	1528.17	1331.69	1235	1752.51	573.7	1739.46	1589.15	1608.06	1827.49	614.209	1565.51	1329.89	1140.86
POS	M105T352	104.99	351.83	1.19564e+06	1.13898e+06	1.2131e+06	1.2583e+06	1.47097e+06	1.31732e+06	1.34606e+06	1.33764e+06	1.23722e+06	1.23159e+06	1.2699e+06	1.34845e+06	1.6634e+06	1.68384e+06	1.36553e+06	1.36831e+06	1.32392e+06	1.30061e+06	1.26505e+06	1.17128e+06	1.17026e+06	955750	1.11095e+06	1.24987e+06	1.20896e+06	1.13376e+06	1.24805e+06	1.30151e+06	1.16407e+06	1.24467e+06	1.13965e+06	1.3305e+06	1.31117e+06	1.23066e+06	1.3491e+06	1.42546e+06	1.31162e+06	1.27106e+06	1.20232e+06	1.29616e+06	1.49736e+06	1.26439e+06	1.26185e+06	1.32229e+06	1.34167e+06	1.35625e+06
POS	M105T216	104.998	215.668	2178.31	5369.56	734.402	6766.41	2396.96	4055.74	4156.29	1341.95	1124.51	5993.62	7895.97	7928.97	6527.24	14193.6	3157.09	5800.99	4708.45	3036.58	6137.15	7698.37	7598.68	6857.73	6378.42	5450.44	8282.47	4154.82	8236.06	3346.06	6757.86	2677.16	3552.86	4625.51	11652.9	4336.9	2571.57	3321.03	2474.73	4264.89	6664.8	5849.77	3622.27	4328.46	4050.79	5398.92	5373.28	7406.38
POS	M105T188	105.031	187.834	37228.7	13382.2	103843	23999.6	4836.68	6853.25	149085	23602.4	17624.9	3127.05	25979.7	2859.2	174787	17203.2	10031.7	5071.09	10443.5	13582.8	13023.2	17019.3	4979.1	5273.67	9602.49	34427.4	40852.8	9446.79	11970.3	10478.5	66080.1	10624.8	22414.5	3209.16	12328.2	71036.8	12058.1	6502.74	15490.7	20850.6	9389.55	12455	5556.6	3635.31	18756.4	18525.8	16773.9	7354.88
POS	M105T240_1	105.042	239.899	1812.42	2375.89	1166.03	1521.45	1583.77	1498.88	1767.15	1672.46	1023.56	2308.31	2604.22	2292.7	1515.93	1473.05	1303	2199.7	1479.03	1966.63	1380.75	1548.78	1316.81	1497.86	1179.53	1415.88	424.907	1455.39	1499.26	1508.15	1288.92	1128.98	1729.85	1883.96	2702.95	1522.96	1868.72	1745.88	1643.66	1996.81	1319.23	1812.79	1685.83	2150	1103.09	1686.07	1799.29	1395.08
POS	M105T50	105.035	50.104	3346.6	1480.6	1788.5	673.38	2124.86	2934.36	9657.05	42909.9	8219.95	500.958	4141.79	1257.82	3459.78	4555.98	4135.18	4486.11	2750.12	2680.29	1738.79	28370.2	8263.2	2585.11	4922.36	2504.22	3083.3	1154.11	3424.85	2995.88	6138.62	4316.25	2802.74	749.724	19511.8	2375.62	3644.62	5168.4	187739	3363.87	16633	2403.53	3538.12	3269.15	5434.18	3018.63	3229.44	2154.46
POS	M105T267	105.054	266.676	571.423	48.4202	132.772	43.4323	132.254	52.5906	365.329	11102.3	90.2228	12211.1	89.6908	312.563	97.0845	151.207	14391.5	119.624	47.3981	6180.64	8659.09	16697.8	384.208	165.671	1930.73	60.9264	808.412	6787.26	351.252	493.787	319.758	53.6263	21726.8	88.9975	218.982	103.541	72.8237	208.843	92.6962	719.743	474.567	137.488	87.3697	10905.9	109.871	93.0037	82.0307	2022.01
POS	M105T288	105.072	287.545	3495.25	2630.04	3134.33	5397.41	3879.12	6100.78	3062.17	3290.44	3747.31	4030.66	3912.33	2887.19	4006.4	4758.59	5420.92	4703.41	3446.76	4976.51	3919.38	4406.07	3109.29	4061.3	3859.92	2664.22	2785.19	28078.6	3939.54	2866.69	3239.2	2307.2	3851.28	2155.42	3678.76	3639.04	3713.55	3965.19	3435.8	4001.76	3980.31	3047.3	4189.64	3602.23	2558.51	4620.53	3630.8	3720.49
POS	M105T240_2	105.068	240.012	4867.85	6525.19	5973.11	6988.72	6216.45	5010.6	5918.22	4604.47	5099.86	8896.42	6779.68	6233.37	8854.44	5892.48	7210.79	6813.39	5252.36	4869.64	5747.5	4811.4	5895.89	4279.76	5508.44	6733.63	6030.95	4915.55	5060.35	6949.29	6287.35	5973.72	7456.15	6795.73	7994.58	4833.97	5022.24	6474.73	6017.46	5273.66	5759.97	5708.9	6812.58	4906.38	5719.22	7106.74	6218.66	6668.42
POS	M105T28	105.081	27.6495	794.769	1136.32	1493.56	1084.51	1054.81	709.85	1207.7	1145.04	1096.63	1295.31	1443	853.678	1447.17	1032.77	1200.81	1359.71	1263.72	1402.17	1329.6	793.168	986.29	1245.95	860.756	1025.9	1346.93	898.936	707.533	1011.97	793.096	1047.52	1351.83	1172.46	1408.2	1109.72	920.511	938.278	1002.83	1309.45	1042.14	1192.37	1064.32	1339.94	1567.14	981.574	780.689	1468.07
POS	M105T274	105.108	273.608	323398	315644	378344	535925	258943	609756	397711	196426	409206	522146	488615	322002	276226	245049	183005	392367	335937	294676	417395	386607	347431	302347	300097	331090	394656	292102	292551	325568	387043	266681	436385	398943	380313	324859	315986	194135	394596	320765	324048	390706	479125	537533	419379	403176	346395	301934
POS	M105T370	105.108	369.763	4614.05	5732.56	7944.86	8018.13	10863.6	8974.48	8039.65	7540.09	7294.52	7142.43	12353.8	10895.3	13557.6	12701.3	15929.2	13805	11452	10939.3	8905.94	10602.1	9498.18	7106.72	14340.8	14809.7	10025.8	7684.91	11619.5	8878.43	12141.4	8672.68	10355.1	10589.5	6897.65	9262.79	12754	13406.6	2399.27	12322.4	10881.5	7615.22	12888.1	13561.7	12398.2	12041.7	13037	8906.05
POS	M106T28	105.965	28.245	2707.52	505.461	988.84	892.958	229.743	1765.79	1699.67	838.808	2841.81	3232.61	379.283	458.95	766.577	848.878	97.0461	248.965	546.292	781.637	263.828	137.175	119.24	157.797	326.273	1090.95	312.315	944.869	81.9855	112.855	252.941	240.713	202.907	421.52	148.01	7635.05	2128.23	241.146	1806.85	596.624	161.275	165.758	1600.81	5811.84	2121.84	3156.4	3150.5	2929.07
POS	M106T352	105.993	351.628	25938.1	24739.2	28758.4	28794.7	31505	30895.4	27153.4	30287.1	27696.2	25171.8	30515.7	29570.2	33760.1	37112.5	28970.1	29546.2	29827.1	28481.3	27781.2	25737.5	26806.8	21897.2	25945.7	30065.7	25891.7	26177.1	27789.6	31574.7	27495.1	26647	24027.2	30028.6	29359.5	29837.1	29006.3	31371.9	27710.3	28342.6	26192.5	27416.6	34700.2	28494.6	28245.8	30324.6	31853.1	30309.9
POS	M106T55	106.027	54.707	24681.7	15855.3	11114.9	76698.8	4718.33	20988.7	48134.6	8178.51	61790.5	726.268	4107.92	3672.41	6926.72	4589.78	4958.23	8883.96	2205.44	5183.58	2183.77	3802.89	4299.05	2777.53	4928.33	2974.98	3008.56	1963.9	3870.3	3842.72	5009.16	4126.33	2573.62	1655.09	1429.94	10843.3	6063.88	4532.24	3252	3318.59	1421.95	2747.38	3476.29	3844.01	5393.08	3444.02	24340	2529.96
POS	M106T188	106.035	187.681	2840.74	882.598	8113.78	2093.43	564.832	593.691	10870.7	2060.57	1556.37	434.058	2339.84	372.829	12774.1	1222.65	853.211	571.755	880.934	1041.54	1139.53	1441.01	338.924	527.98	840.746	2628.96	3463.8	737.206	883.532	970.28	5219.97	833.863	1875.64	319.786	1060.62	5175.95	905.846	699.133	1361.8	1663.92	861.496	860.41	442.84	515.046	1567.81	1824.67	1618.6	950.798
POS	M106T360	106.048	359.745	16034.9	19824.9	13670.8	17912.2	15597.4	13165.5	16938.6	14229.4	17478.5	14113.5	18382.3	19622.1	14963.3	15693	12535.9	18666.8	17768.9	13864.7	15297.2	19357.6	13297.6	16393.2	15553.6	11823.3	18830.8	12851.4	15349.1	14928.3	14534.6	13936.5	14868.4	17523.2	20296.7	14590.6	15404.9	20357.2	12533.1	20663.3	15927	18200.6	16220.6	16706.4	14110.9	15433.3	15069.6	17137.6
POS	M106T375	106.048	375.351	8243.8	6745.53	15746.3	7003.3	11786.1	13081.4	9900.95	15515.4	29189.7	7725.84	9586.47	11282.2	12333	5771.72	12125.2	9732.2	13512.6	13551	8954.79	11339.9	6409.16	4952.7	6032.64	9907.82	7800.23	2532.88	9823.09	7125.88	7796.43	8337.73	7206.09	16075.9	4280.9	6952.09	8088.11	9738.56	7311.81	8913.74	8538.06	10417.9	8182.04	11054	7341.93	11882.7	8078.19	5639.73
POS	M106T267	106.046	266.558	1368.05	1226.52	1461.63	1097.74	1830.61	509.945	1211.56	1653.73	842.967	768.043	1493.73	2173.47	2004.34	2063.77	1301.98	2226.45	873.139	913.15	1450.94	1172.22	865.723	982.681	1696.19	1313.73	1582.26	892.678	1317.95	1391.35	2105.99	1274.59	1187.02	2149.94	1483.29	1004.64	792.479	2137.32	1043.32	2229.85	1622.86	1320.44	1578.64	1177.05	1919.72	1252.24	1675.68	1206.94
POS	M106T26	106.077	25.599	9560.93	8506.32	9527.16	8123.59	9155.42	5949.66	9683.75	8489.92	9818.71	9806.9	8784.9	8317.76	8263.72	13280.2	12286.9	10987.5	9438.99	10261.5	7488.75	7356.51	8503.17	9327.44	9551.54	8993.96	9636.64	5151.66	8145.35	10552.4	10529.3	11251.9	10135	5656.84	8846.92	9256.54	8069.92	9397.33	6667.86	9100.69	6532.21	10346.4	10392.1	6629.23	12656	9006.53	10351.5	6345.45
POS	M106T288	106.073	287.502	838.231	974.686	277.313	803.653	594.898	369.689	653.751	573.393	263.62	1075.92	333.087	237.56	495.464	289.478	747.803	267.776	642.093	496.965	565.319	378.693	621.744	946.46	840.248	212.614	779.729	653.539	752.609	663.972	551.414	576.241	1171.52	549.66	788.381	587.983	246.724	216.786	706.675	839.609	653.576	530.449	349.358	367.832	859.619	524.694	254.692	550.711
POS	M106T315	106.084	315.096	12472	3598.29	3571.07	9369.3	6296.19	3677.86	5823.69	106370	5028.46	6276.42	13395.9	9238.74	5388.07	6882.4	5632.16	6390.72	6182.31	6201.66	4445.96	6684.49	6339.55	5138.8	5098.43	7850.87	6867.21	6139.95	4742.31	4498.85	4726.77	3488.74	6006.08	8571.89	4140.03	16269	6040.96	6803.51	7307.89	6320.87	7876.53	3889.2	7862.93	5136.31	8287.23	5685.63	6998.26	13209
POS	M106T274	106.11	273.743	22955.9	14233.7	22093.7	32287.8	23735	35793.3	14719.8	23228.6	22428.4	28734.8	28555.3	20058.8	18514.9	17927.5	21282.5	13861.8	21335.4	9319.04	25285.7	18303.4	19695.2	18013.6	18180.1	20986.5	19974.8	19916.4	31486.6	22723.4	21925.3	17895.7	32301.1	14228.4	27691.4	27653	22797.5	22578.2	26887.2	12060.6	19452.4	14171.5	26394.4	16315.3	25753	24402.3	18877.9	21432
POS	M107T24	106.916	24.094	3531.69	2321.77	2111.44	2198.69	1177.56	3666.4	2386.79	2247.66	4352.55	3248.18	1910.84	1939.06	3272.37	1877.06	1149.22	1133.83	1723.45	2061.47	1343.05	1140.72	1295.17	1375.37	1734.95	2329.89	1317.44	3265.77	648.144	1115.24	1846.53	698.912	649.472	1969.59	1462.97	5864.99	3812.21	1355.05	2749.91	2158.25	1163.42	1304.12	3158.35	6391.99	3313.58	3446.55	3673.8	3240.82
POS	M107T349	106.969	348.719	4073.71	7175.1	5578.58	5280.27	3962.15	4088.07	4325.77	2433.42	4096.77	3283.93	3482.5	4864.9	9486.07	3379.27	3557.39	5844.11	5129.09	3645.44	3508.22	6335.94	4986.65	4386.34	7698.89	7916.42	5218.01	8024.21	3387.46	5664.35	5373.82	5290.83	5616.36	4952.89	3709.71	4848.44	4296.74	5442.03	5343.03	6340.51	5708.45	2664.35	6992.47	4677.09	4038.94	4010.28	5755.08	5645.45
POS	M107T352	106.994	351.694	5687.19	5149.65	6206.41	5230.69	5185.24	6412.6	4773.39	6553.67	5214.9	4855.92	7142.97	6116.34	7013	7953.48	7361.26	5201.02	6859.5	6007.32	5823.68	5645.5	5835.91	5020.98	5377.5	5543.81	5419.69	6612.9	5920.21	5748.09	5843.25	5378.33	6132.58	6514.52	5691.7	4062.64	7314.53	7094.08	5927.65	5523.59	5691.53	5303.52	7437.9	6923.98	6594.71	3999.05	6008.41	5485.23
POS	M107T240	107.047	240.001	18616.8	24978	22696.6	24415.2	23188.9	20212.3	20909.9	35454.9	17390.8	33316.8	28126.7	43873.7	27892.3	21595.5	16613.9	28219.5	20661.5	19409.2	23411.2	34173.1	20406.9	14873.4	37295.3	19588.8	40440.8	16609	20406.3	35429.2	20330.6	19148.4	45572.6	22095.9	56534.6	18045.2	17075.1	22978.2	21013.5	20101	21443.2	21429.7	24068.8	21109	21334.8	22623.9	20668.6	22484.3
POS	M107T282	107.047	282.185	3990.45	3964.72	4648.55	4429.42	5273.28	5092.32	3725.96	4684.01	3959.11	4278.44	4618.41	4750.85	7142.6	3826.84	3996.14	5015.2	3837.14	4103	4579.37	3709.2	4002.63	3461.73	4355.73	3729.29	3915.77	3714.89	5404.35	3767.92	4675.37	3806.52	4200.43	4458.63	5987.68	3869.18	3592.7	5312.7	5384.91	4160.12	4031.25	4171.63	6182.64	3474.61	4234.69	4491.17	3824.11	4244.03
POS	M107T314	107.058	313.766	92207	58474.9	61200.6	98101	72553.4	55261.9	88870.2	65565.4	67610.3	59203.2	81252.5	108003	101597	95814.1	87499	115493	62181.3	63358.8	84727.9	87137.6	96065.2	77392.7	101741	80118.1	93452.8	50240.3	104309	97656	96286.3	93826.6	83262.7	69297.8	94911.3	85293.4	101338	96825	79006.4	90302.4	96640.3	104339	116473	84668.1	97454.4	87417.4	82588.7	102766
POS	M107T705	107.068	705.317	2568.22	5285.88	2954.61	3031.36	3474.65	3122.57	3260.69	3981.31	3577.18	562.638	3386.41	4198.93	2949.16	4502.72	3950.6	3892.48	2584.68	3184.22	2855.17	2701.26	6235.12	2569.03	2841.12	4076.85	2276.42	6328.99	3272.64	5777.12	12386	2705.93	2036.69	2247.98	3444.32	3536.51	15557.2	14049.2	2317.83	2470.88	3194.6	3806.72	3652.21	3117.98	4093.12	3469.82	16050.8	2191.8
POS	M107T648	107.068	648.379	2847.5	3209.85	4420.28	5704.75	4525.6	3001.17	5172.2	2265.51	3488.57	2287.82	3259.84	2606.59	3172.61	3442.44	3437.39	4155.39	2722.06	3391.95	2176.64	2345.9	2921.97	3322.88	3476.56	2271.5	3760.13	2660.49	3330.55	3171.85	4692.95	2990.11	4174.04	2917.78	5226.04	3045.07	8254.29	3987.87	2995.73	3401.57	3530.79	2663.89	3499.2	128.009	3753.3	3263.86	2515.86	4414.79
POS	M107T44	107.058	43.717	7616.47	5001.51	7207.11	7907.58	2285.3	8967.26	8675.24	6429.51	5357.53	10229.6	6671.6	6816.88	8223.09	2024.06	4620.52	6999.93	6747.7	3508.59	1840.97	5715.66	8802.63	5689.92	5607.58	8658.43	2162.72	1669.41	7204.04	5776.78	10246	1885.41	636.481	1109.71	5773.23	7074.95	5085.25	6911.19	2229.8	6701.87	1012.24	7695.89	1847.84	2427.84	9030.15	8619.59	4108.59	3365.97
POS	M107T11	107.068	10.783	3546.33	5352.5	3950.84	3778.38	3331.32	5646.35	3958.06	3773.24	4042.15	2969.78	3761.69	3406.12	3392.52	3903.02	3722.25	4065.07	3353.38	3500.89	3211.44	3796.6	3708.3	3852.92	3691.73	3816.56	3756.17	2902.23	3278.19	3780.76	2386.16	3619.23	3615.86	2052.76	3958.8	3692.65	3961.79	3696.49	3041.41	3447.43	3948.61	3419.81	3880.74	3420.76	6754.91	5944.35	3819.61	3796.98
POS	M107T678	107.068	677.792	3683.95	2324.29	2449.2	2750.52	2537.92	2827.47	1976.44	1039.11	2546.49	2116.39	2465.8	3021.7	2150.49	3146.42	5297.77	2863.49	2402.61	3003.29	3032.62	2787.02	5313.06	2707.48	2919.2	3130.05	524.223	2857.88	3007.13	2951.6	3188.77	3777.51	5063.56	2330.45	2417.37	3114.48	1974.36	1838.94	4769.38	4420.67	919.492	2477.8	2210.21	2246.29	3122.83	519.63	3709.03	5496.47
POS	M107T45	107.083	45.211	23612.9	37754	35286.2	24778.1	32002.8	40647.7	29884.5	16147.1	42062.9	17144.6	13069.7	4712.23	19603.6	11466.8	20777.1	14284.2	9257.99	14751.2	11439	7837.8	5526.9	12414.8	12824.4	4352.67	17968	11891.8	13977.4	12577.5	12691.4	12863.8	14182.6	12442.2	12168.3	7947.16	7434.86	14503.4	7104.43	7271.97	13818.7	22511.9	12463.9	12763.2	18176.5	13232.4	15163.2	13144
POS	M107T28	107.097	28.248	293.231	522.934	696.321	2164.84	418.359	302.289	2758.48	636.249	395.494	435.955	2390.18	1404.89	2085.61	791.888	708.888	453.67	830.659	681.803	1526.27	1762.8	1781.5	403.791	247.232	1596.8	1540.02	277.947	1728.59	1652.45	330.64	558.783	1902.29	1817.21	932.567	1103.45	1994.7	763.846	375.986	2303.32	796.519	352.875	530.551	2339.29	334.636	422.841	274.023	2942.21
POS	M108T281	108.009	281.419	16263.2	29408	19296.2	24035.5	28966.4	23151.4	21147.7	25715.5	24554	23726.3	40101.6	36433.8	48618.7	58291.7	42599.3	46071.5	46430.7	34241.6	35632	40564.1	39123.7	34175.2	55244.5	40093.1	37757.5	39428.6	42717	42061.4	52766.6	41864.8	35798.3	32656.1	18977.4	45742.2	48043.2	50065	49039.8	44925.3	38985.6	36253	39700.5	37580.3	51932.8	38208.1	41702.3	34452.8
POS	M108T91	108.042	91.379	2531.87	5051.34	6772.07	9056.81	9421.64	19844	9091.05	7479.16	14418.1	7569.13	14175.9	10024	11262.2	2660.41	1974.22	11671	9190.03	10138.6	3720.43	692.508	3880.05	3427.69	15484.9	6533.31	3391.71	7720.48	4378.12	7217.21	5746.7	7359.97	13827.7	12431.3	6661.81	6214.15	3152.42	4829.3	7480.88	6395.15	5089.06	2941.49	12490.4	3544.91	11252.5	6084.96	11819.9	5677.56
POS	M108T240	108.05	240.009	1829.62	1382.65	1793.71	2515.47	2156.84	2281.96	2801.09	674.38	948.982	2547.33	3106.85	1115.46	3216.11	2451.1	2653.1	2070.95	1585.65	2604.62	2508.44	2515.06	1699.28	2021.96	1983.96	2481.33	1424.15	1438.85	1700.46	3006.03	2667.23	3174.29	1510.99	1345.7	3523.68	1250.86	977.458	1374.75	2496.07	2279.12	2595.81	1860.27	2707.07	2293.58	1595.46	2663.2	3009.18	2812.04
POS	M108T314	108.061	313.91	6416.78	3918.19	2815.81	6325.5	4382.75	3579.44	5089.87	3776.97	4416.92	3393.55	6554.81	7006.41	6976.72	6755.96	5643.88	6284.74	4687.27	4339.51	5048.87	4794.01	6320.88	4881.7	6191.53	5954.79	4999.43	3290.51	5568.51	5508.39	6159.03	7098.35	4725.38	4166.09	5632.15	5036.07	6374.2	6845.1	3826.54	5694.82	6210.59	7480.57	9035.28	5086.18	6437.59	6167.63	7059.42	5342.18
POS	M108T63	108.053	62.945	88044.6	85370.1	92392.7	90088.9	73850.1	79788.2	106375	41826.9	48221.1	72206.2	84620.5	75125.7	88129.7	118163	174485	123072	88551.4	123224	80162.6	149405	107440	105436	153179	102780	79649.6	65542.8	100083	86570.2	125851	113887	90817.7	69186	123516	75478.2	160267	112926	75480.2	168368	87087.4	80863.1	123772	87921.5	77282.9	89545.5	137609	129496
POS	M108T619	108.078	619.284	60534.8	114567	77756.2	129820	106319	87468.8	42410.2	32101.3	136045	28384.4	10947.9	46601.1	94231.9	86481	184620	85594.4	91051.9	66215.6	168152	67332.9	114087	62140.5	160948	97980	78972.3	14767.7	118649	231054	52749.1	99675.9	200727	110597	71847.3	79290.3	41571.9	163772	48185.5	47974.3	115202	79815.6	87500.6	131223	406828	117775	124370	41350.4
POS	M108T687	108.078	686.746	27673.3	21225.3	28599.5	22553.8	16795.7	15274.9	30947.8	21162.5	34467.2	13391.9	25515.2	18215.7	19505.4	72694.9	21089.4	18621.2	16565.8	15961	15312.9	23732.4	13127.5	25842.6	27066.9	25251.1	17012.6	12960.8	19257.9	13920.9	10759.7	19568.5	22194.4	7282.67	17824.8	21907.7	39077.7	28176.6	13778.7	24527.1	38268.9	11368.1	27393	14485.1	30450.7	19484.2	18220.1	24638.8
POS	M108T655	108.078	655.229	14204.7	17720.8	12904.9	12756.5	11469	9106.36	13091.3	13699.1	16031.8	8245.06	12723	15635.8	13721.4	15826.4	36372.3	13266	13240.5	12491.2	10609	24923.2	11159.4	11961.8	14777.4	15917.8	15385.3	7406.3	20442	12338.3	17829.8	22463.8	21507.2	8744.43	13054	14014	11821.9	14537	8131.15	18681.2	14347.5	11691.1	12818.8	9211.32	15489.9	13456.3	14068.2	13509.5
POS	M108T26	108.092	25.602	17094.8	18628.1	18959	18496.9	16382.8	11174.9	18840.1	20055.5	17784.1	9836.78	18222.4	15862.3	17077.2	22464.2	20991.5	19984.5	16181.2	15136.5	12326.3	18421.6	18563.2	21270.5	18409.3	15234.8	19019	9964.8	14422.2	18208.7	18365.8	18656.5	19159.1	9901.21	20172.5	18661.5	19187.6	18181.5	11032.8	19018.3	17735.6	14922	18353.6	11652.4	17165.1	16137.7	17521.5	18025.5
POS	M109T24	108.916	23.9805	3277.03	2160.24	2136.51	2490.81	1051.3	3728.61	2263.45	2465.46	3998.05	2972.83	1436.49	1980.39	3268.24	1888.74	1174.19	1108.72	1466.48	1695.47	1220.73	1228.26	1390.22	1307.04	1593.94	2190.93	1269.19	3194.9	667.176	1238.33	1662.11	739.948	706.491	2152.87	1513.15	5191.3	4052.43	1191.81	2658.19	2254.58	999.133	1236.47	2946.19	6432.15	3747.3	3224.56	3283	3541.44
POS	M109T282_1	108.993	281.532	701.351	419.682	661.304	452.434	721.064	376.025	470.12	489.345	539.818	625.516	943.533	757.697	1071.47	1107.24	1100.49	1352.25	1017.92	771.811	969.177	925.52	942.963	916.258	1084.19	846.513	876.803	1302.26	551.534	1004.8	1381.9	1065.82	966.992	690.965	408.476	988.552	1173.75	1121.57	1310.49	902.272	878.038	943.004	855.495	1017.39	1418.13	760.97	939.708	858.973
POS	M109T282_2	109.012	281.54	380.74	954.661	718.76	515.369	1002.7	553.525	477.345	752.008	626.078	629.423	1159.48	1056.79	1041.04	1464.7	947.851	1249.36	1240.36	836.35	593.051	994.313	1236.25	750.432	1025.31	879.759	1008.08	1115.59	1035.25	1177.21	817.157	1090.11	932.304	1181.01	768.661	1240.32	1136.15	1191.93	1226.27	1095.95	824.845	1033.89	838.833	564.59	1251.8	862.456	1066.26	844.349
POS	M109T199	109.026	198.744	815.706	807.395	1222.33	710.201	1281.21	1805.78	825.875	1817.97	447.996	682.093	543.681	533.122	1145.13	794.193	886.426	720.406	819.097	695.962	762.245	697.222	670.502	553.958	735.767	557.663	575.069	594.398	523.239	674.11	764.626	701.341	586.136	727.159	834.411	639.241	750.207	519.14	694.669	698.926	642.998	662.581	629.401	859.467	763.748	539.513	594.277	820.352
POS	M109T296	109.026	295.942	4396.54	3944.35	1887.28	4486.58	3280.07	3850.01	3706.42	4338.51	4625.5	1132.65	5160.05	3468.8	5077.58	5275.46	1363.53	1147.81	4430.13	3489.46	3448.49	4617.38	5381.37	4191.61	3121.53	4413.57	3932.57	4898.77	2497.36	6021.9	2988.93	5132.71	3344.4	2001.25	4121.47	4855.73	4903.56	2900.93	5534.73	2574.37	3255.27	4564.07	6121.85	4049.05	4012.49	5858.09	3625.4	4064.58
POS	M109T254	109.037	253.615	2836.89	1157.43	1993.54	2267.99	1695.02	1518.7	2359.43	3221.91	2521.9	2419.65	2686.93	2970.26	1591.42	1264.89	2850.5	1784.79	2758.39	1960.22	1953.97	2948.06	2529.97	3281.48	2947.78	2598.99	2581.03	2401.92	2367.66	2283.81	2823.57	2707.96	2675.89	2136.35	2445.86	2409.67	2887.58	2014.19	1940.77	2818.38	2755.64	2433.4	2467.39	1750.84	2153.68	2656.17	2575.59	2502.9
POS	M109T314	109.061	313.807	81913.4	50319.3	58433.2	84628.6	68208.6	48519	76155.6	73419.2	55488.3	51781.3	81564.3	93786.3	90100.4	77666.8	68731.2	96446.6	62227.4	62763.2	69276.8	76048.3	74635.4	64072.7	83966.7	73885.7	81068.5	45443.2	90703.7	77822.5	90400.1	84337.3	67863.2	73773.2	82667.9	73466.4	79489.2	80741.1	69535.5	76978.3	81508.8	90058.5	94349.5	60773.1	82640.5	72131	71623.1	81842.4
POS	M109T190	109.074	190.044	17464.3	11489.1	17267.4	13686.7	5492.86	11573.5	15523.8	11768.2	16343.6	15013.1	14191.9	16060.6	20504.5	22322.4	7043.81	19007.5	6563.22	6931.26	9280.35	12147.3	13287	15470.4	19614.8	24580.1	18030.8	12209.3	5698.23	10046	18643.1	5539.03	5835.32	11103.4	16837.8	20645.2	21400.5	11598.2	15852.8	18428.8	15540.6	14607.6	23347.8	23521.5	23802	22724.1	16215.8	24338.5
POS	M109T44	109.074	43.73	24123.6	16241.4	794.856	22279.2	21295.8	24418.5	24357.4	22197.1	23626.2	15624.5	25894	27179.8	25556.5	27394.1	22976.6	26824.4	22749.4	18470.7	31839.1	20568.9	22081.5	22477.9	21404.3	26710.1	23244.3	19604.3	22357.2	33214.3	27844.9	20674.7	22136.8	17311.4	30054.2	31084	28740.6	29659.5	21190.9	26333	24892.1	33032.9	45195.2	27625	26339.3	42494.8	41908	42821.6
POS	M109T25	109.088	24.9525	2926	2975.97	3285.78	3185.5	3083.55	1988.7	3318.71	3217.55	2887.73	2295.78	3011.87	2678	2825.41	3257.28	3370.2	3567.12	2818.88	2814.61	2554.67	3143.27	3686.06	3256.51	1998.77	2174.72	2829.03	2423.42	2081.58	2714.88	2815.46	2644.58	2796.6	2370.68	2249.77	3062.62	2643.02	2585.83	2703.29	2775.1	2128.12	2268.56	2514.51	2336.46	2728.42	2325.24	2460.7	3246.04
POS	M109T45	109.099	44.591	20163.2	19935	17562.2	14787	19126.6	17108.3	22021.1	19370	14839.8	12625.6	18961.3	25302	19889.1	25874.7	21085.1	21461.6	24314.3	16857	10409.1	19552.3	13291.2	26172.6	14482.2	28749.6	16062.5	19428.4	21331	11813.2	14309.9	11326.3	15523.3	21041.3	27403.8	20789.6	13054.9	27902.8	15374.7	14645.1	24020.7	27065.3	30904.2	13085.7	35811.2	30654.9	17135.3	13991
POS	M109T28	109.113	27.505	1711.26	2237.16	2347.62	1882.65	2091.64	1659.72	2526.52	2128.51	1627.71	1955.22	2792.29	1895.24	1967.02	3652.84	3284.28	2138.57	1924.91	2281.38	2441.23	2179.63	2316.17	1914.44	1803.44	1279.47	2943.3	1511.31	1727.64	2610	2025.85	1975.81	3151.13	1636.64	2468.74	2046.8	1837.03	1910.12	1962.67	2205.17	1990.01	2067.71	2140.97	1759.75	1930.96	1696.6	1790.94	2010.97
POS	M110T281	110.005	281.495	1123.67	1214.18	670.253	867.943	1277.16	955.888	1153.34	1333.67	1089.13	1227.65	1973.89	1881.07	2091.72	2654.87	2183.59	1692.22	2263.36	1773.51	1636.87	1777.42	2188.54	1524.15	2416.91	1857	1664.9	1768.97	2012.37	2138.62	2355.36	1951.48	1976.42	1606.5	918.877	2053.62	1342.94	2177.09	2348.73	2224.74	2272.31	1756.65	1822.57	2115.87	2403.11	1843.64	1913.25	1550.78
POS	M110T289	110.019	288.946	1974.99	229.134	785.338	469.043	8393.94	2679.73	910.095	12494.7	558.277	71.0842	1791.33	459.989	3040.26	199.476	119.039	553.445	55.4386	139.882	490.891	722.589	228.825	131.863	158.588	928.325	6473.9	72.7541	102.406	81.7601	352.869	145.849	2848.8	259.796	11462.1	1361.89	289.601	78.9183	1416.35	574.196	2159.82	396.619	1840.62	148.169	420.486	26162.3	461.859	65.8888
POS	M110T328	110.025	327.562	354.972	790.397	547.271	398.841	894.055	363.015	407.703	353.612	361.688	456.227	1046.01	912.844	354.742	1020.44	680.051	603.071	839.416	489.089	789.037	826.458	461.919	823.798	1174.15	669.389	1035.52	595.141	1175.3	576.071	1527.21	452.772	943.999	624.983	614.584	969.671	707.12	831.418	710.45	903.993	842.136	758.332	409.897	713.891	795.588	805.134	581.145	598.484
POS	M110T161	110.033	160.887	1590.16	28191.4	3259.68	2912.76	9397.28	2100.94	2578.9	7607.31	3610.94	5770.52	2294.59	2582.99	2126.87	4188.82	5396.27	5863.31	5511.95	3007.18	9092.7	6373.78	3294.11	3686.28	6282.61	3709.12	3991.17	6378.32	1393.45	8547.82	4551.21	5096.08	1987.22	3839.51	30481.7	5435.45	7174.19	5160.88	4977.32	2886.59	4576.19	4814.17	9813.96	4006.88	7344.55	4729.93	4050.43	2890.76
POS	M110T362	110.07	361.834	755481	904726	753269	743949	774988	606652	826438	860084	668451	590304	808903	814070	775148	656775	638783	860267	626494	694531	723869	717408	742609	656886	780226	691822	974403	553491	750400	884384	839109	792988	743333	865375	944141	885029	814872	715477	597164	772628	736694	801844	930929	879395	763405	730131	764353	955609
POS	M110T391	110.07	391.478	315537	583297	343698	836479	819461	345863	334108	353985	320137	359850	823591	392332	596125	553727	408446	622130	317226	320497	659397	750082	498640	354321	513068	507602	331598	292217	813736	586763	385113	503234	532111	329332	515036	339243	342568	351652	745706	800622	362770	608431	652008	382388	343100	503629	324573	611292
POS	M110T299	110.069	298.944	66427	26899.2	51772.7	50120.5	89111.8	46434.3	57165.2	51641.3	60261.9	42511.2	31815.5	33714.4	62871	51090.8	41557	24263.6	26937	34242	32016.4	31236.1	39589.7	40967.3	33741.9	51221.8	35861.3	37391.5	39448.8	40284.6	39475.7	40582.2	22425.8	31658.6	33315.7	208285	79438.4	26822.2	60464.2	43533.8	29438	33413	68076	70248.4	55415.9	67416.2	62370.6	70290.1
POS	M110T461	110.069	461.022	318147	876177	512176	554428	688192	334300	225682	672290	362979	359541	507688	540457	250060	498947	209697	443636	480257	326963	658381	457558	433492	564614	360970	385726	202780	367491	473668	483098	366097	356430	473624	518116	757197	308617	213193	369997	451652	372457	314275	578397	531869	588097	434482	414168	305494	300357
POS	M110T416	110.069	416.149	312284	397783	370563	360160	331356	315713	430984	288822	352210	255510	382543	338410	485785	329290	298198	328501	179725	291873	302727	387712	352160	274091	274796	348822	376265	92223.5	275455	276938	356103	262465	257084	404278	204555	388193	187248	300064	405231	337014	278079	381008	340311	447001	304811	315080	361223	389874
POS	M110T25	110.072	25.46	6112.09	4311.67	5878.63	4869.47	5636.06	7054.43	5696.38	7181.18	5767.6	7302.98	8903.61	7924.82	6802.55	17537.3	7380.93	6867.46	10379.5	8247.2	6921.47	5411.38	5881.46	4972.41	9427.73	12244.9	11723.2	4527.1	6453.82	6079.9	7771.32	4717.52	9258.37	7100.26	12016.2	9977.32	5612.36	5414.15	69545.2	5587.99	13557.5	5008.79	5155.29	4261.67	7392.11	3729.03	18817.3	56651.6
POS	M110T190	110.077	189.94	1379.03	508.721	568.017	1093.18	816.633	696.661	1000.22	498.111	752.177	701.797	871.223	735.554	928.769	808.279	1328.49	985.925	1002.65	862.059	1249.27	653.621	1357.33	2428.55	933.176	1493.51	786.067	799.629	1048.03	475.109	1091.85	1137.87	2095.61	609.897	503.102	945.384	1231.08	696.046	667.235	1024.32	605.75	610.21	1187.9	1068.38	950.741	1477.25	1629.54	1397.87
POS	M111T247	111.014	246.847	1507.97	1164.96	778.22	1067.08	1400.26	1248.45	1480.57	1233.72	1553.48	501.896	1628.68	1301.77	1406.25	897.774	1040.6	1281.38	1576.19	879.6	1289.7	1255.5	1660.68	1447.58	1212.18	1571.85	923.687	9952.04	1096.28	1064.58	1261.89	1158.84	1108.89	1697.17	1321.2	829.477	995.824	502.627	1495.87	1476.19	1026.34	1338.92	1178.3	1432.83	1731.03	1000.38	1160.78	1565.18
POS	M111T54	111.042	53.764	6428.83	11336.3	10273.1	6307.45	9300.11	8460.31	7844.28	4634.47	10756.6	3623.78	1560.52	1002.03	962.11	1923.65	1809.91	1515.14	1138.62	1394.19	1032.24	1300.8	1264.53	1111.4	1000.01	936.37	1349.19	844.728	1564.3	1116.64	1306.62	1345.47	1100.17	549.092	948.67	1273.66	1163.39	1015.26	899.126	915.513	545.301	1407.85	1394.61	985.396	1380.05	1243.13	1104.57	1407.37
POS	M111T121	111.053	120.95	333812	133525	784672	164640	315444	392640	315448	165722	820016	113360	425580	134984	345388	787737	897818	178126	121031	238182	140890	424779	205136	120954	147258	774031	155158	143082	114248	159967	319045	186809	150515	141503	190374	148797	72028.7	801688	149851	301586	140215	130239	321293	167491	147295	167855	174298	316213
POS	M111T137	111.053	137.284	535988	377574	654535	236610	488772	226277	491877	655917	627154	967053	152871	584158	862928	665360	791942	143139	554884	173986	437957	156810	536420	658197	437996	523639	1.09521e+06	372755	488891	526347	671563	396431	784718	554221	516776	503226	472645	611222	574923	542835	517435	122675	1.05246e+06	528064	209390	576045	628541	558295
POS	M111T196	111.053	195.538	38831	72494.2	41328.2	51227.3	56180.3	49342.6	65660.7	62513	64714.4	85634.1	52687.8	44788.6	42404.1	39421.1	55857.7	51115.8	58996.7	63581.7	58017	53146.9	52583.6	43969.7	58299.9	50342.1	56249.9	85686.3	48703.4	62310.4	55936	4032.24	58060.1	52411.6	74725.2	60978.1	45098.1	45107.3	55542.7	62836.7	50434.4	67923.9	51714.1	60952	53963	49557.7	52313.2	64669.8
POS	M111T86	111.053	85.978	371429	390023	422388	437837	261511	372219	610025	360011	476346	326966	553002	387759	125349	481213	537762	170072	618274	148030	418901	314843	328546	363091	170981	470564	403737	276554	407221	444107	540009	112621	379191	348963	409011	566834	360016	386339	351484	508192	487572	454015	418025	479047	422666	321299	315523	485988
POS	M111T361	111.072	361.139	31686.7	40912.1	33805.6	37298	36396.2	36369.8	34833.8	39874.6	31646.5	35553.2	35783.3	38185.6	38679.3	32538	28296.7	34554.8	31257.8	32787.4	34449.8	31427.2	33403.1	30257.9	36782.2	30689.6	42979.4	29377.6	32127.6	38975.6	37056.3	31044.3	33064.6	31208.2	44991.5	36639.5	33744.4	28438.8	33976.9	33923.3	31975.4	36431	42718.8	35452.6	32105.8	34095.7	35308.4	42422.6
POS	M111T25	111.067	25.167	1071.09	3514.15	1231.68	3350.66	3797.05	951.957	3344.27	3496.54	1321.94	2867.46	3550.93	1150.02	1144.51	3793.25	4048.69	3992.1	3848.05	3856.52	3286.66	1131.9	1053.37	3685.77	1086.59	3320.44	3855.85	1164.03	1001.05	3734.81	3330.29	1201.2	1090.92	906.585	1015.16	3679.38	3493.64	1127.66	4576.39	1369.23	1128.37	3555.78	1226.33	608.908	1074.29	1095.99	3717.95	4610.2
POS	M111T391	111.072	391.106	18486	20108.1	14042.1	29585.9	26703.1	29191.8	16377.5	15297.8	12934.9	21646.9	19846.8	15516.4	24788.9	21666.8	19303	21749.7	26049.4	36698.6	21454.8	35471	20835.4	18133.4	20442.7	29134.9	20147.7	12340.5	23022	13820.1	24658.9	11915.6	16613.6	40712.3	22992.4	20413.4	21335	16863.7	14084	18794	22073.6	19230.4	23531.4	25175	16465.6	16856	22347.2	22367.1
POS	M111T37	111.089	37.1555	110284	94723.4	83682.2	79643	40991.8	78048.8	75318.3	72598	88818.6	47186.9	83259.3	45733	70976.1	64293.1	97366	65154	58018.5	57437.6	86081.4	68515.2	67547.2	73830.6	98325.8	79026.5	105656	64296.2	68611.7	95726.5	88605.2	69063.4	58630.1	45162.6	50111.9	85991.2	80094.1	58387.8	49296.4	65875.5	74912.6	57037.5	86274.4	73490.1	85344.2	66140	86313.4	95554.3
POS	M111T26	111.104	25.668	5478.01	5866.93	5990.98	5831.89	6651.91	5439.71	5914.28	5796.22	6323.14	5366.27	6269.23	5852.24	6781.63	6707.46	7277.45	6288.29	6590.27	6722.59	5994.01	5804.93	6360.67	5883.11	5968.14	5115.78	6772.52	5749.36	6644.84	6557.93	5510.52	5897.42	6340.48	6020.52	7439.5	6322.25	5984.57	6231.53	5841.38	6197.77	5716.64	6400.93	7033.49	5945.34	6280.21	5400.85	5499.6	6009.6
POS	M111T45	111.114	45.4635	30306.7	23057.8	8403.61	8580.8	8764.74	28872.4	12790.9	6218.63	11784.7	8429.1	8144.37	8520.9	12594.3	35713	10276.7	31739.3	11153.1	10678.5	5954.11	26586.9	29633.7	6101.33	8367.86	6457.25	9351.24	6140.62	10081.1	34842.6	30080.9	39360.8	10042.9	26228.7	11001.6	32249.8	53139	27571.6	57076.4	30037.4	24991.8	6925.54	5416.63	31369.2	8756.92	34690.4	9387.4	38642.2
POS	M111T28	111.129	28.173	913.143	1116.57	1295.66	1135.47	956.935	611.217	3284.23	1189.9	5788.26	2734	3188.48	622.678	672.775	3725.15	3518.26	1030.8	849.301	3787.28	946.819	974.608	845.343	687.338	830.951	516.141	478.804	3351.34	728.922	1068.18	811.072	868.034	2215.54	555.324	1135.71	838.39	638.996	655.219	1015.05	966.195	902.925	953.917	964.594	651.696	860.233	904.641	595.487	1401
POS	M112T422	112.048	421.584	2296.99	2498.52	3507.24	1684.64	7008.72	5488.65	3700.1	3361.08	3579.32	2581.72	6648.87	4958.69	8987.18	5793.87	6902.05	6466.29	13202	6983.21	8278.29	5026.02	5355.52	4507.54	8998.42	6754	4237.3	3590.39	6695.86	6196.38	3955.53	6546.52	5213.31	5008.1	3328.9	5677.71	6273.51	7001.32	9819.96	4006	6127.3	5133.03	4965.37	6350.66	9080.65	6675.71	7212.38	6057.17
POS	M112T232	112.048	231.858	3733.54	2919.65	4450.85	4073.1	4763.71	7649.43	3463.6	4981.93	6076.66	5479.1	4103.05	4568.71	4430.46	3910.82	6225.55	3405.72	5234.68	6276.99	4177.24	4334.44	4756.36	4121.95	3985.24	5456.67	5756.37	4662.64	4477.29	3625.19	3970.16	4355.61	4066.25	5852.72	2413.21	4114.84	4291.09	3348.02	5091.84	3682.26	3653.56	4272.26	4776.27	4879.6	3146.05	4405.92	4138.19	3759.78
POS	M112T157	112.048	157.052	11542.3	5514.9	3618.23	7431.31	7244.94	21442	7652.02	4839.95	5635.52	4289.8	8576.65	12132.3	9308.01	18831.7	4798.31	6837.33	6066.19	15466	8752.5	5390.7	11154.4	6215.88	7189.86	11269.5	8118.65	5878.5	7671.26	7528.17	7396.7	8329.97	4661.97	11906	7713.5	12015.1	6175.88	7833.42	11580.6	8635.32	7193.89	3054.55	11285.8	8594.94	6569.91	13956.1	14508.7	5863.84
POS	M112T300	112.037	300.342	3062.17	1669.05	2400.18	2775.23	1443.93	2071.79	2456.88	2148.16	3529.78	366.023	1684.11	1767.13	1709.4	1962.38	1713.15	1665.33	1294.14	524.382	1438.21	2011.89	2034.33	426.98	2103.4	2926.74	1581.14	2143.79	1075.51	1896.01	2944.16	1350.76	1391.55	1326.53	1776.81	3831.53	3803.48	1855.21	1823.8	1882.54	1659.06	1903.98	3126.86	2422.43	2980.31	2707.35	2934.61	2548.4
POS	M112T186	112.048	186.489	4492.69	1917.44	7744.08	3038.74	3136.89	3176.11	4676.58	3094.03	2884.33	2400.6	4304.41	1986.43	3035.15	2422.67	1734.59	2983.82	3006.7	5272.24	1673.13	6016.71	2436.01	5946.73	3129.76	3780.94	3404.66	2547.95	4841.3	1808.79	1963.73	2097.45	4090.8	1781.32	3068.26	2733.77	2213.2	863.728	3965.73	4423.49	2290.04	2876.39	2961.82	4535.09	2079.11	5793.27	2957.24	2822.35
POS	M112T47	112.073	47.091	8777.74	4247.65	8842.85	8041.92	7660.19	8896.61	20022.3	7474.51	8819.8	4553.45	56242.8	7979.31	8482	8375.89	8345.32	7406	7103.75	8775.68	10033.1	6397.31	7145.84	14621.7	15840.1	6922.12	8295	5757.4	5491.91	9634.31	11947.4	7786.19	83779.7	9304.13	11805.3	11453.7	9421.5	7341.31	8117.58	8417.43	9799.81	6071.6	9499.2	5968.07	25840.4	6035.76	12272.7	9476.69
POS	M112T342	112.073	342.41	3672.92	3201.7	3408.8	1829.82	1942.66	1391.7	1667.1	2600.01	3324.45	1190.11	2686.25	2652.77	2622.58	2006.78	2259.59	2599.87	1066.7	4364.92	712.159	1703.19	2476.13	2042.28	1810.33	5086.54	4972.85	2405.63	1284.98	1070.11	2814.12	2665.79	2368.48	2164.47	2792.16	3433.06	2784.48	1175.41	1640.15	1262.09	2805.66	1392.64	3408.72	1509.99	2039.21	3433.95	3067.22	1478.99
POS	M112T256	112.073	255.947	3701.84	10913.1	10938	4063.54	2183.74	2770.54	13796.2	2496.5	5148.09	10460.6	13126.4	9571.54	8552.55	7963.67	3849.15	12300.2	2639.77	6536.01	7310.48	11420.1	12581.3	12874.2	11908.7	8895.22	9050.65	7199.53	2115.21	12933.6	9712.92	13809.7	512.418	7608.58	18064.1	8915.02	6027.2	8448.23	8617.64	11996.8	10237.4	8226.58	4815.44	9513.44	5830.42	10453.6	11923.4	6987.94
POS	M112T141	112.085	141.198	5366.55	4986.15	5903.13	1865.65	6348.64	5194.48	6055.86	6265.31	7105.59	4662.34	5139.09	5817.22	5937.08	5298.17	5847.04	6028.76	5247.38	5736.6	5355.62	5614.96	3006.79	4591.88	5197.31	33822.7	5281.94	4028.6	1056.91	5718.65	5789.51	6481.47	6509.79	5134.56	5861.74	5297.4	5043.77	6234.06	1740.33	5758.83	4892.83	4838.9	11429.4	6260.81	5070.98	13422.7	6074.53	5836.42
POS	M112T250	112.085	249.882	35004.6	35179.3	34258.2	34139	38570.3	28216	35533.2	43674.2	42103.7	29731.6	35848.8	33859	48841.5	24350	43027.9	35374	39019.7	34661.9	34236.2	37829.5	37498.2	34494.3	36694.4	33072.6	36779.2	29204	34318.7	35010.1	36400.4	38272.8	36280.7	31498.6	43378.7	38048.1	40598.8	36566.2	29976.4	39078	36240.5	32654.4	40120.5	42803.6	37350.9	37049.5	36573	38627.6
POS	M112T500	112.085	500.214	11430.7	22515.7	15720.2	12778.1	12535.8	11878.7	11690.5	14252	14020.1	11866.1	17813	14237.6	24234.1	23194.3	19137.9	24779.5	12045.7	12543	10805.4	12882.5	13867.9	15243.3	16467.9	14257.4	16519.1	10214.9	15226.8	14429.6	18162.5	17064.4	12337	13510.7	27199.3	12177.1	18867.9	21143.6	16121.4	19991.4	19594.4	10758.9	16010.8	13146	21230.8	18055.7	18475.8	17338.1
POS	M112T36	112.093	36.2925	4460.41	3365.46	2443.95	3507.83	1638.31	2493.44	4226.46	3921.93	5157.86	1467.12	3512.92	1288.01	1918.21	3282.78	4660.37	4842.8	2160.87	2521.91	5448.3	5676.72	3499.37	2705.1	5332.64	3257.37	5403.23	3888.86	2457.49	4321.73	2126.19	3038.75	4125.31	1807.4	3508.26	4536.48	3381.97	3566.59	1900.06	3622.02	4999.01	1727.46	4604.74	3384.13	4014.95	6164.33	2631.69	4066.94
POS	M112T388	112.097	387.915	500.155	5793.66	4701.08	3513.71	5004.76	592.948	1156.07	4407.51	5167.58	3762.95	4857.54	4360.86	6713.21	7330.64	13997.7	15961.1	10508.3	1882.83	1724.12	1403.82	5087.92	6234.28	4033.4	7896.44	772.552	476.99	944.961	4014.88	5073.88	572.603	973.278	7778.02	6764.78	5092.93	12605.3	18116.6	4502.31	6205.37	2514.48	3551.48	4277.92	7460.78	3890.97	9857.98	867.554	779.751
POS	M112T213	112.11	212.607	3819.81	4352.72	3690.2	4100.25	2789.51	3621.67	4220.34	4958.15	2306.06	4147.9	3183.96	5402.5	4545.46	3056.43	4278.47	2623.01	3901.81	3906.75	3872.78	4832.35	5197.71	3754.9	4056.94	11258.3	4450.2	4029.34	4592.11	3722.77	3557.8	3585.9	2710.05	4340.64	2449.74	5363.78	4183.21	2540.36	3699.81	4234.26	3222.23	4996.63	3638.08	4138.27	3966.45	9817.58	3666.63	4231.28
POS	M113T156	113.032	156.357	147877	172185	89166.8	149636	214848	143989	197871	167059	119456	177640	64552.3	150375	239327	124028	132168	93699.6	150255	166358	188517	90188.2	135391	123142	129499	132196	100882	165041	132545	191957	108166	185584	81319	151975	111305	143295	172820	117314	104852	143806	151178	126411	196902	137128	138506	137539	143253	145347
POS	M113T11	113.044	10.606	1118.21	2209.05	2693.43	1526.26	615.531	2687.57	2316.03	1455.4	2728.87	2328.1	2460.04	2388.62	2594.4	2622.89	2785.2	2793.37	2469.27	2640.14	2668.59	864.858	2480.35	2337.87	2378	2699.77	4885.36	3040.62	2387.69	2724.53	2640.31	1358.12	2647.31	1427.92	2627.28	3022.47	2722.8	5211.86	2394.12	2610.78	2554.36	2508.85	2750.75	1407.46	2645.71	2664.14	2846.57	2854
POS	M113T372	113.069	371.743	56377.3	66565.6	69452.2	63715	74359.4	66410.6	58890.7	55971.7	50481.2	42835.6	61333.5	61672.3	58888.7	62539.5	55932	61470.8	53559.7	61417.7	48760.6	58234.2	53599.3	55701.6	62461	52716	71942.2	49765.4	76534.8	53301.4	66111.6	54359.7	55687.6	56064.7	53811.9	50883.6	55412.8	51464.4	49013.3	69867.2	64619.8	61792.4	66547.6	60569	66375.9	72806.6	68157	52010.4
POS	M113T286	113.069	285.503	8863.18	63770.2	2650.79	4009.41	3201.92	2567.5	4374.68	2555.1	10767.6	3307.48	85367.2	1188.8	73554.1	58575.6	52586.2	46700.7	39425.8	21880.2	18452.7	76092.8	60262.2	74968.6	55952.1	51163.7	65145.6	33650.8	85345.1	43889.3	47680.8	60006.4	741.47	23096.1	57768.8	75912	63333.4	53946.7	74251.6	82660.7	55266.8	53978.6	54127.8	26309.3	49287.6	53342.5	54932.1	57461.3
POS	M113T250	113.088	249.892	478.019	16680.7	626.827	27068.6	389.175	25.1563	498.726	18238.5	655.641	637.945	310.24	17598.7	375.931	6262.76	223.973	488.08	679.463	544.632	206.05	273.663	264.131	541.504	595.876	506.423	615.956	432.235	607.027	105.42	15716.1	540.74	533.668	516.644	14477.2	643.736	396.433	22084.3	3641.45	278.9	506.521	15262.3	369.794	151.35	742.833	408.844	167.918	492.155
POS	M113T14	113.105	13.612	94523.4	158719	94872.6	121998	88520.8	15139.5	133760	152966	91342.4	90567.7	147165	141914	57150.3	77320	96746.2	81032.1	66178.5	14951.8	37510.1	121627	113106	302557	118981	103636	129224	57445.8	153226	110199	83130.8	113266	70638	48102	106081	61048.8	124635	51753.6	44587.4	130108	122899	143726	103285	41003.5	89316.3	31755.9	129053	116677
POS	M113T26	113.12	25.988	68114.7	90554.3	57600.4	75617.7	68376.5	25747.6	59123.1	104585	57045.8	37140	76294.3	81328.7	80916.1	71516.9	67648.5	64525.5	50180.5	38589.3	29310.2	79108.9	67087.5	81826.9	66219.9	58285.9	96118.1	38543.5	89524.5	59403.7	56774.5	54861.2	64159.6	32007.7	69240.4	77722.9	70369.5	76014.3	30093.5	82310.1	62962.1	74877.4	69820.8	29765.7	58732.2	56729.7	49681.5	63620.2
POS	M113T29	113.145	29.29	94290.5	172831	3903.71	2767	5981.89	31343.8	1711.65	5792.24	66276.8	19545.1	3415.01	98762.4	117228	2078.77	1676.54	4606.94	2616.62	7249.45	2054.77	98110.8	73062.8	4682.88	82398.4	66984.1	96270.4	41804.5	113684	3882.18	2073.98	68258.4	2249.32	36934.5	7681.87	56263.4	83745.5	83606.4	1805.1	3488.13	1853.8	74053.8	75032	27876.9	69736	68406.7	70822.4	7365.6
POS	M114T162_1	113.723	162.122	19654.5	10502.5	20366.6	19262.4	24744.2	19977.6	22032	21044.9	19284.3	22064.9	22585.3	23857	14126.2	28827.1	24158	21897.6	21370.1	21375.1	22933.4	21759	14340	15144.5	12275.7	24853.1	24543.3	21020.8	16083.4	25836.7	24875.6	23319.7	14850.4	20252.9	20503.1	23185.6	23529.3	21340.6	24137.4	24200.8	15241.1	25924.2	20666.4	23265.6	21145.5	28286	14400.5	21142.1
POS	M114T156	114.036	156.147	5276.07	7373.32	3397.98	6236.57	8015.62	6390.23	8439.87	6397.59	5163.72	6997.49	2887.03	5157.19	9201.05	5067.07	5484.84	4307.52	5576.01	5934.79	7345.91	3650.27	4986.01	5304.22	4579.6	4664.94	3742.66	5787.46	6234.11	6623.47	4465.29	7832.56	3302.75	5873.86	3494.14	4756.76	6956.03	4346.52	3664.39	4129.75	4885.12	4679.66	6830.02	4798.98	5504.41	5097.77	5669.29	3970.76
POS	M114T430	114.053	429.991	26753.7	16664.7	20838.8	22620	21650.4	27526.9	19835.7	43305.3	20751.3	20431.2	23096.2	44453.3	25052.9	31619.5	26677.8	76608.5	26146	37545.2	25862.8	64800.8	23070.8	24637.3	30788.7	27532.1	29043	17783.3	38871.1	29505	32541.1	26044.2	27321.9	22615.9	43868.6	21392.9	54701.7	98484.8	45599.7	37209.3	27477.4	33133.1	25240.9	21723.7	32376.6	34663.2	26659.7	23446.2
POS	M114T372	114.053	372.017	21313.3	21410.5	23697.2	26603.6	27042	25356.4	22454.2	16655.4	25351	22266.4	23401.1	26853.2	23191.2	23132.9	23587.4	18223.7	22415	16624.3	19559.5	16889.9	17787	22370	21798.9	20732.9	23348.6	23406.5	23174.5	15860	25359.7	17042	17915.9	20255.4	19722.9	16941.9	20427.2	21761.9	16304.7	19549	23112.3	21753.3	19229.1	21201.7	25354.3	21190.1	21743.3	21914.2
POS	M114T398	114.053	398.173	9433.79	14563.1	14101.3	13142.3	12639.1	15430.6	14304.1	9163.39	14607.2	15683.2	11775.9	12585.8	11784.7	13839.3	17108.8	15489.2	14952.2	15048	12231.4	12662.4	8386.59	11871.8	12643.9	13734.7	12122.6	14164.5	11478	11943.6	13908	15632.3	24179.5	15453.4	8729.04	14393.6	6725.88	17040.6	8987.58	13054.4	13284.7	14627.9	16674.8	9937.93	11959.9	15368.2	15553.7	12798.2
POS	M114T162_2	114.065	161.546	9.39997e+06	8.11253e+06	9.23306e+06	8.90519e+06	1.04411e+07	1.16888e+07	9.68056e+06	1.01465e+07	9.68596e+06	1.03374e+07	9.94558e+06	1.03257e+07	1.23172e+07	1.14571e+07	1.11051e+07	8.94082e+06	9.38717e+06	1.1744e+07	1.00994e+07	1.01634e+07	9.6084e+06	8.13017e+06	8.76659e+06	1.19119e+07	1.12984e+07	9.73001e+06	1.04327e+07	1.24557e+07	9.98695e+06	1.03582e+07	9.77782e+06	1.18012e+07	1.04393e+07	9.63415e+06	1.08238e+07	1.03047e+07	1.1345e+07	1.05012e+07	8.97919e+06	1.11033e+07	1.01573e+07	1.11453e+07	1.02956e+07	1.25827e+07	1.24767e+07	9.66838e+06
POS	M114T330	114.064	329.862	20760.8	68939.8	25165	31058.4	34754.9	20182.4	24200.1	30755.6	25296.9	28273.1	18920.4	20069	34327.4	24598.8	22829.6	35366.7	23247.2	21297.3	23475.1	19593.1	19015.1	32912.5	23796.5	20967.1	35045.2	17946.9	17483.3	19226.4	29386.7	22580.1	26420	18005.7	73996.1	20616.2	25548	22519.4	11483.6	23512.5	37794.7	14847.8	26359.3	25305.9	21808.3	22369.9	27054.7	26172.4
POS	M114T46	114.089	45.881	72692.4	47604.8	140093	72726.2	117817	62991.7	67504.5	1.06046e+06	84661.7	51154.3	106510	88604.2	65780.6	81487	72153.9	68975.7	57115.1	171788	66767.5	68134.2	75537.5	91878.5	68943.9	73344.1	79864.5	52169.1	57307.3	66801.3	83960.9	72749.6	80976	56103.7	68493.2	227310	149692	66704.3	57044.5	82671.8	67670	66067	67577.5	108253	75110.3	113815	197164	111337
POS	M114T16	114.089	16.308	6697.85	44288.7	55653.5	7914.16	20817.8	43125.2	6037.39	23905.9	32878.7	13101.1	43238	22711.6	9110.57	21780.5	3161.39	34119.2	44207.9	33672	19596.5	25625.4	26782.8	44560.9	4959.46	26167.3	17433.8	13065.5	8110.48	49140.6	4156.6	4443.56	6361.44	11339.6	27387.3	19896.5	48481.2	5256.08	11803.3	29575.9	47235.3	45712.1	52793.5	22378.6	4981.8	22782.6	31382	26159.8
POS	M114T300	114.089	299.741	15561.4	53804.3	20475.5	19649.4	25209.4	20417.8	22839.4	17673.4	47245.2	20420.9	15944.8	16421.9	17721.2	654144	257063	49818.3	33396.9	899697	114104	17921.9	21231.8	30796.6	94344.4	15812.1	16924.9	23646.6	17020.9	22087.8	39258.6	367552	16101.5	20918.4	16378.8	15891.9	236441	99344.8	21036.5	18202.4	28241.7	19727.1	99465.2	21856.3	38771.9	67262.3	194504	29208
POS	M114T389	114.1	388.565	21321.3	24355.3	24079.9	21829.5	19740.6	15572.9	23268.5	26330.7	23811.5	20057.2	24126.2	18861.2	17901.7	20570.3	21004.2	20056.4	22972.8	19974.2	18525.6	24182.5	23611.5	26773.7	23202.2	22562	21958	15205	19374	21176.2	23104.5	22767.4	25429.3	15438.7	28422.5	23994.3	24740.7	18238.9	14527.5	23689.2	23830.9	20705.1	23233.2	17268.6	20841.3	22754.4	22360.8	24162.9
POS	M114T25	114.104	25.132	23736.8	26874.6	29949.1	28206.4	26453.3	25478.9	32576	25113.9	31185	24292.1	6575.3	25846.5	26017.1	35973.9	33572.5	36175.2	29035.8	31760.8	24641.8	30386.7	29157.9	27857.2	26551.1	23924.4	27045.1	22745.4	23441.1	29168.3	28981.1	28587.6	34136.9	21264.5	31350.3	25753.7	28643.5	30164.2	23257	28094	27469.2	28362.8	31887.6	22095.1	31116.7	28735	26505.3	27030.3
POS	M114T207	114.125	206.933	4272.75	7504.42	5377.45	5371.78	5174	8281.12	9568.48	9558.54	17962.1	7677.8	12720.2	8778.44	10365.5	9731.7	11019.5	19484.6	5973.8	8551.9	5623.88	9416.78	20150.2	7509.42	8516.97	5975.26	14039.2	3163.49	18872.4	4259.14	17271.6	5659.53	13339	7626.78	5064.1	5864.28	11207.5	7619.15	2393.64	9694.92	7187.52	11574.8	10794.4	6806.66	7483.81	10871.6	13103.4	6729.52
POS	M114T26	114.123	26.104	3707.33	4944.3	3168.79	4455.34	3960.87	1104.94	3772.6	4782.05	3306.9	2165.5	4465.8	4318.2	4796.34	3201.03	3008.59	3528.01	2345.66	1562.82	1081.13	32545.4	2936.37	5416.25	3525.54	2218.85	27997.8	1812.34	4223.91	4253.06	2509.77	3117.49	30159.5	1497.67	3588.82	4580.13	3662.3	3778.29	24064.6	5060.31	3159.07	4103.79	3147.99	1084.74	2711.56	2946.29	3073.34	3434.46
POS	M115T157	115.037	157.447	2204.49	5504.44	1963.62	2785.67	3090.22	2323.78	2915.93	2310.69	4242.24	3008.45	1685.4	1999.63	3747.7	2338.73	3886.56	2075.04	2408.79	2376.86	4696.37	1664.1	4375.46	2780.67	3112.5	3237.17	1451.03	2837.66	1620.34	2761.24	3364.41	2823.86	3709.06	2750.39	2313.31	2257.97	2622.39	3159.59	5166.48	2694.26	2485.73	2532.97	1931.22	2345.9	2377.55	2210.94	2498.17	3452.98
POS	M115T330_1	115.048	329.755	4058.76	14737.9	4991.78	5507.94	6767.2	3025.94	4735.04	5215.25	4515.58	5067.67	3568.26	3029.49	7213.09	4129.75	3520.73	7786.78	5667.97	3637.39	4771.21	3685.65	3334.81	5087.79	5040.64	3002.36	5253.72	2772.74	1880.19	3153.67	4485.37	3958.41	3870.9	3020.02	13738.1	3786.37	2886.72	3535.21	2362.41	5781.56	4976.23	1849.24	3975.68	3660.87	3085.58	4256.5	5771.22	4063.15
POS	M115T302	115.048	301.714	438.704	11637.3	10397.7	7300.92	16140.5	6780.79	10061.3	15361.7	14299.5	10569.5	6621.22	5532.03	7337.35	6008.03	560.02	5829.88	9723.28	7303.44	674.338	7368.15	6509.59	9371.39	290.242	6232.3	6727.1	5514.48	5141.41	6148.61	6892.57	5701.39	9311.62	5366.03	14975.8	13586	9261.55	3844.33	477.003	7221.29	5082.04	5931.48	5999.58	6900.69	5407.86	6279.14	8448.6	8724.48
POS	M115T239	115.052	239.293	24775.4	39451	28798	33856.3	25890.2	22391.2	16625.1	27069	20951.8	20485.3	27514.9	26945.4	29754.9	22698.6	21950.3	26243.3	23105.6	19896.1	19422.6	24895.7	24486.8	19139	21255.2	20755.6	24989.4	22171.4	19718.6	23471.4	25704.4	22462	23672.3	25150	35514.8	23153.1	23840.1	26857.1	23340.7	26236.2	23189.1	27692.9	33027.9	21518.5	22834.6	29120.6	26267.5	29646.7
POS	M115T76	115.048	76.306	11120.2	7313.9	12889.4	14324.9	11628.9	10433.5	12917.9	11698	10273	12825.1	18643.8	11782	15340.8	18031.1	8860.6	16824.6	15167.5	6846.61	14411.1	15272.4	11036.8	12367.1	9226.29	11227.4	12069.1	9582.21	12027.1	13049.9	12344.6	13410.4	14420.5	9880.14	12921.2	23038.2	14018.5	15273.7	21494.5	41863.1	7757.33	12815.4	10902.6	13259.5	9912.23	11559.6	10493.2	13735.8
POS	M115T34	115.052	33.841	4990.24	6431.56	17325.3	12362	8794.33	10165	9667.47	11447.9	9610.58	5832.05	5496.77	27796.3	14823.6	9540.21	548.74	8619.05	8125.49	7543.13	6779.5	3144.64	6992.52	9600.2	5698.7	5989.15	6733.23	11327	6830.23	7060.7	5794.21	7647.19	4963.7	34618.9	17858.9	10905.2	11443.7	7769.37	16252.1	10807.3	7187.71	27016.9	712.639	8255.84	5472.53	7864.24	7161.87	7999.9
POS	M115T274	115.059	274.303	5130.96	4555.93	4858.9	8432.27	6282.63	7803.8	5261.96	6016.53	7169.53	5026.46	5991.65	4555.11	9128.43	10488.1	5536.26	5640.43	4321.49	4799.22	8364.22	4855.22	7335.01	6482.63	6850.72	8514.41	6932.5	5665.44	6631.74	8496.55	6114.06	6305.89	4974.94	5869.96	5859.07	6729.32	3503.56	6630.07	6004.86	6147.35	5364.59	4048.41	5045.55	6346.18	6075.79	7366.84	7245.97	5835.18
POS	M115T162	115.067	161.862	346597	290323	313975	312539	384023	411660	355549	392971	342088	383264	359623	387786	476792	427185	401833	327956	362037	406063	351608	368946	366805	295027	311208	436687	402896	316466	386291	429751	347821	363549	361692	433693	369812	359627	396007	374601	388430	405928	318520	422738	368804	408692	360850	446853	434904	349736
POS	M115T25	115.067	24.961	1512.59	6585.92	4893.66	2425.57	5571.95	2567.87	3626.71	3220.87	3234.12	2525.41	3540.5	5599.53	7675.61	3071.2	2774.28	2642.07	7959.71	3912.41	4346.36	3756.32	2201.63	3785.63	2544.52	1938.36	4488.17	2825.82	4853.27	2646.68	2969.33	3855.04	3484.33	5435.99	3276.62	3344.09	2850.59	3181.65	3615.93	4320.69	3990.71	3626.59	3456.1	3816.31	3490.52	2406.91	3185.04	5087.42
POS	M115T330_2	115.067	329.707	852.754	1802.36	813.618	1056.27	1299.11	907.651	665.775	964.917	1099.85	1100.31	717.928	1137.08	1605.83	1359.93	973.492	1385.96	1033.28	507.709	996.941	690.239	656.458	775.151	1134.84	876.929	1240.06	736.352	654.219	954.882	1041.63	933.405	597.742	900.45	2744.09	779.415	495.217	952.217	650.187	778.248	1152.44	833.698	936.768	1136.25	734.865	966.365	1375.43	782.136
POS	M115T372	115.084	371.847	21878.4	28307.7	23777.1	24841.2	26434.6	26963.9	23069.7	21235.8	18709.9	18239.2	22763.1	23472.1	22689.4	23026.1	20165	21158.9	18486.5	20531	17557.1	24401.4	18587.1	18991.7	26148.7	19907.7	27602.9	14309.7	28526.8	18701.5	25134.1	20342	19603.1	20839	20825.9	22367.6	19508.9	19151	18302.3	27010.5	25104.3	24683.1	27393	22829.4	26378.6	29533.9	26403.1	20380.4
POS	M115T492	115.084	491.552	11378	16009.2	11376.8	11717.1	9938.28	12322.1	8499.77	5078.89	10611.8	6492.4	8930.86	8034.46	14540.2	17579.1	10654.4	15303.1	13610.2	10612.5	6303.68	7809.07	8324.18	9029.07	7781.82	9888.92	10292.9	4612.9	9615.21	6954.13	9637.02	9109.5	10210.7	8196.46	13928.7	11258.9	10358.8	15048.1	5225.69	11334.8	7979	9504.1	17267.4	7049.19	13286.6	8151.84	8163.04	5714.67
POS	M115T40	115.083	39.874	30689	60932	33766.8	15906.7	7525.86	20408.6	13397.4	1625.02	12577.1	8086.01	5862.16	52110.7	8870.62	12167.8	12595.5	14838.5	18032.2	15974.4	1867.18	16184	15542.8	2996.88	15507.9	18738.3	4112.77	642.506	1415.53	16084.3	18736.8	3216.52	2066.62	12484.9	24745.6	12904.6	14911.7	16831.3	13991.6	34923.3	11673.5	1017.38	18656.3	6862.03	12402.6	20939.7	11089.2	20052
POS	M115T203	115.084	203.174	4490.89	6178.16	4284.85	8001.01	7248.34	8927.43	5316.33	4688.9	5623.14	5539.71	7970.26	6909.41	8289.14	8348.87	6180.92	6862.25	5927.16	6021.6	4193.09	5721.01	5895.89	5034.87	7243.45	5490.43	6472.68	3969.05	6117.27	4459.55	7116.06	5043.92	5593.03	5592.93	367.445	5729.35	7421.77	6201.28	5222.7	8290.83	5796.03	5620.84	11671.2	7368.68	7472.12	6919.93	6234.9	6092.11
POS	M115T305	115.085	305.167	3745.42	3006.18	3737.16	7379.61	3119.88	3233.17	4501.57	3197.59	8035.31	2167.64	2590.87	3525.76	2742.46	38076.5	16842	2478.42	1676.82	57862.6	6640.74	2828.39	2388.35	2147.13	5050.12	3209.37	3293.43	1644.17	2259.71	2816.18	2725.55	22954.9	2459.8	2844.32	2715.72	4608.09	14815.8	6462.25	2650.16	5863.07	2159.19	2779.81	6074.97	3451.47	3738.45	4082.59	11341.5	4776.65
POS	M115T46	115.092	45.978	7791.55	5606.12	8189.25	7176.92	8012.22	7376.39	6851.58	50214.4	7348.99	4548.81	3294.24	11336.8	7773.37	7246.94	6618.36	6322.21	6926.21	7285.05	6337.57	7409.43	5651.05	5348.69	6862.6	5129.95	7474.02	7373.65	4666.28	6234.62	8947.97	6421.23	6269.49	2919.47	4500.02	8798.75	7251.51	6931.9	10106.6	23597	6961.22	8335.24	8409.09	6610.11	10498.7	9654.22	8241.39	6591.9
POS	M115T389	115.104	388.661	1207.66	2630.74	1222.47	1400.25	3238.96	3458.25	891.789	1774.66	1490.66	1203.83	1239.72	984.191	2805.37	306.211	1207.87	1082.23	3084.25	1153.92	2671.65	1557.9	1530.63	1695.47	1587.05	1172.84	753.151	941.357	2781.78	527.146	1130.44	2778.54	1442.4	3346.43	1415.63	1515.34	1568.11	814.194	3042.14	2408.73	1418.54	1100.94	1218.56	902.475	252.543	1427.95	1220.44	2191.16
POS	M115T26	115.136	25.641	1463.99	1681.66	1257.33	1529.13	1966.57	725.906	1349.01	2740.8	1507.27	2068.94	2347.12	1661.48	1743.16	1139.95	2533.39	1514.53	1697.39	2942.12	1233.42	1769.02	1602.07	1837.7	1509.55	1111.67	3345.17	931.788	1666.09	2868.18	1221.42	1634.66	1375.5	912.888	1284.53	1847.78	1590.27	1443.53	845.478	1738.62	1670.01	1008.01	1462.9	925.757	1308.83	1327.97	1717.9	1665.54
POS	M116T297_1	115.721	296.846	12742.1	12661.8	15399.9	10345.9	5842.14	10980.8	11081	14625.2	10703.2	10934.8	16556.8	16654.4	13860.9	16009.4	12290.9	13122.4	17204.4	12430.2	13654.7	12890.2	12500.3	11535.7	11008.8	14563.6	16227.2	15810.4	14403.1	10840.2	11312.1	10528.5	14851.8	17290.8	13000.9	11509	12343.3	17684.7	18233.8	16666.5	14716.7	11863.8	14358	12491.3	8837.92	16530.4	13502.7	14836.8
POS	M116T252	116.025	251.758	717.863	738.61	885.823	920.5	577.548	1313.08	1473.57	866.695	1741.42	1379.14	1338.05	816.543	549.072	1086.59	813.787	756.374	739.331	750.963	876.785	846.34	1091.05	865.899	1432.86	1633.56	1288.65	1072.36	404.881	1105.39	1582.22	524.576	531.109	821.463	1701.07	1209.3	1967.68	812.262	955.62	936.352	920.084	555.025	1710.67	1516.42	1677.13	1897.71	1862.87	2211.1
POS	M116T383	116.032	383.178	1798.88	2777.63	1868.85	1674.18	2383.88	1912.77	1436.03	2126.59	1001.14	1626.64	1966.31	2122.61	2104.33	4300.87	2190.18	3019.37	2539.76	2725.32	1826.76	1764.58	1786.01	2288.82	2347.49	1617.94	2179.97	1692.94	1582.3	1991.74	1834.16	2871.96	1654.93	2262.51	4229.55	1860.97	2328.81	2660.99	2378.95	4840.37	2121.1	1560.09	2821.52	2075.03	2300.18	1617.29	1928.24	1664.83
POS	M116T239	116.055	239.041	809.891	2387.65	21290.6	14401.1	2181.66	2343.62	20417.3	11620.4	2362.18	14765.1	15418	13749	3016.11	2420.9	2057.87	12531.1	10052.6	7721.59	2426.81	10100.8	2734.92	975.865	863.025	31337	14193.5	15642.3	5143.71	1425.49	18789.3	5232.87	4742.21	1835.39	6969.75	25749	24120.5	8491.6	913.04	1312.57	2113.51	12629.9	25944.8	2167.47	20226.4	33556.7	26038.5	2417.85
POS	M116T241	116.068	241.081	19625.6	7792.78	21612.4	14800.6	6237.45	15437.6	23222.7	12454.4	20472.1	14316.6	16632.6	15273.5	16972.8	17462.9	6080.32	13219.5	10518.1	1996.92	9816.14	10009.5	12149.2	13042.6	12316.2	32605.3	14123.9	16297.1	6199.65	9218.85	18877.8	1814.94	2081.23	11958.8	2094.46	25346.1	24726.8	9354.92	16050.3	22150.7	9734.21	2599.12	26720.7	42702.1	36886.9	35259.7	44340.2	50288.5
POS	M116T297_2	116.07	296.721	5.42633e+06	5.36935e+06	5.7232e+06	5.61972e+06	6.28148e+06	6.71978e+06	5.84367e+06	5.00146e+06	4.90287e+06	6.41626e+06	5.60519e+06	6.46432e+06	5.92532e+06	6.62664e+06	5.39437e+06	7.92235e+06	6.30687e+06	4.94689e+06	5.69239e+06	5.00059e+06	4.92842e+06	4.45694e+06	4.91882e+06	5.60781e+06	6081836	6.23286e+06	5.74764e+06	5.14401e+06	5.48988e+06	5.01363e+06	6.02281e+06	7.56071e+06	5.85763e+06	4.99943e+06	5.43934e+06	7.49067e+06	7.49826e+06	6.30356e+06	5.86683e+06	5.25687e+06	5.4809e+06	5.48712e+06	5.54264e+06	6.25101e+06	6.04932e+06	5.79257e+06
POS	M116T162	116.069	161.612	21703.3	15254.7	18458.4	18110.5	21618	22507.6	20325.3	19788.6	18680.3	20195.9	20077.9	22039.5	27162.6	24110.3	22532.7	16962.3	19932.8	22031.4	20827.4	19780.7	21341.8	17137.6	17184.9	24185.7	23790	19586	23061.5	23667.6	21742.4	21729.5	21054.2	21846.5	20732.8	22976.9	21509.2	18616	23982.6	22498	15634.6	22936.9	19731.6	20668.3	21087.9	24779.5	24037.1	17916.9
POS	M116T493	116.068	493.39	23483.3	48336.4	33796.8	30055.6	34160.3	50543.3	117869	32609.6	35957.8	30674.8	31967.4	32946.5	34981.7	44649.9	29961.4	134860	34606.6	28911.2	20665.8	27517.8	28794.9	26223.2	124718	26667.2	29340	22478.9	26067	25889.4	24540	28786.2	25899.9	29351.9	131863	25099.4	32301.5	46571.9	36772.4	127574	22851.7	25184.3	134254	25055	67832.5	32937.1	108014	56627.3
POS	M116T113	116.068	112.572	10582.8	4029.1	12240.1	3204.02	17079.3	23514.4	11226.3	9119.43	11079.1	58790.9	24598.7	9053.11	2643.43	9755.71	7675.97	5399.91	13507.8	9130.9	7795.93	3682.4	14903.4	33691.5	8915.61	73530.9	9218.86	11066.7	9423.23	7379.19	3094.41	11088.9	18849.4	15750.3	9514.98	7284.71	5312.54	4422.18	18944.2	9221.74	12996.9	4043.05	47033	22670.4	9085.83	40169.6	9895.07	8335.87
POS	M116T27	116.063	27.151	447.879	5728.31	555.981	5889.06	5673.56	5121.91	925.215	5313.44	6805.08	687.53	5002.31	5822.54	4912.14	7275.67	6644.06	6589.61	5010.51	4918.98	4681.97	6391.74	6010.48	6002.77	6488.03	5458.53	5890.81	994.273	5587.48	5973.28	681.512	6552.62	6477.39	4429.15	5901.37	599.197	5827.68	6828.46	4738.4	6013.1	6096.07	4719.27	6736.44	4933.96	747.091	488.791	6319.7	5575.98
POS	M116T198	116.079	197.578	2288.81	1591.72	2186.45	2281.14	4306.07	5337.01	3918.45	4535.18	2252.64	1147.75	2101.26	2665.91	4814.54	3142.57	2277.61	2379.38	3802.55	1138.92	2977.32	2951.29	2241.19	4671.42	2308.8	2474.99	2316.72	4446.94	2159.72	2268.13	3115.85	3827.13	2919.33	3338.38	2784.42	2629.05	2286.23	2238.85	4541.77	3729.45	3098.56	1971.57	1643.11	4823.96	5488.09	4411.44	2207.02	2434.58
POS	M116T25_1	116.083	24.881	1268.82	1594.58	2719.02	2255.54	2184.42	1713.26	1967.69	1617.72	1367.65	13289.3	1465.58	3803.02	1798.02	12846.1	12718.5	1294.2	9786.25	2433.75	2312.14	3289.5	11396.3	1641.46	12009.9	10204.3	10497.9	1916.83	10697.1	1689.05	1724	1484.25	13057.7	2201.63	1349.46	1585.13	1266.6	1492.6	2251.99	1318.14	9460.48	10908	1685.12	1970.74	11539.9	856.64	1734.14	1947.58
POS	M116T346	116.079	346.457	1720.57	1296.73	974.618	763.316	644.295	914.299	1164.37	980.275	1256.02	707.788	312.099	1367.03	631.174	367.783	1114.84	912.408	715.068	687.412	842.404	1919.5	1267.32	2133.11	2233.83	1214.02	1224.85	719.288	1034.53	790.696	1399.57	1122.76	1197.29	427.576	958.931	1008.01	448.451	955.286	492.347	1680.73	1206.74	1365.22	695.737	800.398	1538.82	1267.45	923.097	1317.94
POS	M116T25_2	116.12	25.3695	6902.17	7324.83	7405.5	7213.92	7069.09	6497.18	6798.74	7108.9	7575.71	6154.62	6817.05	6548.98	6912.58	8539.08	8821.53	7209.85	5598.56	6533.23	7145.26	8333.52	7348.51	6774.11	7165.32	6812.26	6919.66	7098.83	6674.51	7298.16	6058.83	8283.41	7860.15	6517.31	6946.76	8194.14	7229.96	7026.75	6300.68	6908.44	6907.6	7621.86	6942.25	4422.06	6650.94	6927.84	6703.08	6698.13
POS	M116T153	116.141	152.624	5946.24	17280	50950.5	5460.98	5581.36	6013.42	29309.5	3975.71	4287.6	5224.73	6040.85	5348.74	5459.7	5498.86	5221.53	4469.4	6508.16	5760.16	6943.62	3918.86	6781.15	5707.45	5184.77	4963.62	5557.73	21518.4	27449.9	4473.76	4626.89	5536.59	6386.27	25622.4	4973.51	6512.18	4419.76	5133.22	6539.18	5513.12	5264.82	26235.1	4780.68	6513.2	4835.38	4417.67	5333	5255.42
POS	M117T54	116.981	54.1065	3900.21	134.025	1952.38	2162.14	1554.39	1127.52	4180.04	403.726	1112.15	0	75.0088	126.909	728.406	1009.33	293.036	692.094	76.8142	1709.42	0	274.257	243.967	0	0	2541.58	57.7864	6096.4	118.688	335.658	299.796	353.774	422.685	302.508	0	283.665	43.4982	804.286	980.566	25.1968	242.805	469.912	730.109	1391.67	594.712	4458.73	669.931	602.418
POS	M117T257	117.046	257.245	3543.97	3346.25	2457.65	2972.68	3732.91	2962.78	2777.17	3192.38	2279.16	4220.68	4742.61	4627.5	1988.5	2852.36	3319.61	6362.77	3861.86	1656.69	3685.4	4217.43	4042.15	3603.65	6985.49	2582.82	5094.54	3329.14	2687.28	4110.26	5951.94	5291.76	7175.65	5325.11	4162.15	4664.99	3151.42	4988.75	3519.82	4882.79	4192.09	3097.16	3488.44	3662.23	4238.41	4123.91	4934.33	3344.94
POS	M117T239	117.055	239.369	36019.8	35837	37266.8	41835.6	40907.1	37218.3	31571.2	40355.5	33400	32491.8	41649.8	56628.2	48107.7	36711.1	33082.1	42736.9	34036.2	30830.3	35292.1	36082.3	36971.2	28590.1	31351.9	30592.3	35723.9	28683.3	32570.2	35831.1	36122.7	33351.5	37995.8	35184.7	42308	32953.3	34730.8	38611.1	32715.7	37102.2	35856.4	39813.2	48385.8	37062.2	39627.1	44753.7	35696	40303.8
POS	M117T182	117.055	182.449	1876.18	3003.4	1637.7	7035.49	3523.27	2109.17	2101.15	3862.28	3667.74	6211.3	4531.41	4959.62	8631.48	3264.87	2284.24	6260.14	4747.21	2707.91	1112.2	1128	1843.68	3793.18	7145.95	3242.35	3711.95	1066.94	4820.99	1929.34	2673.68	5126.79	3805.31	5810.05	4553.11	3053.94	2548.09	7719.92	2690.67	3299.93	1288.08	1959.69	3075.89	6084.29	8958.39	2821.48	3290.99	1159.76
POS	M117T316	117.064	315.711	27952.8	18795.2	46383.9	49733.4	56458.5	37273.7	42064.6	45007.3	59103.3	28060.8	1285.86	76492.7	91472	100101	82474.1	52897.7	53391.1	47380.7	38812.9	53321.5	37305.4	25804.5	53127	63719.8	87018.8	26242.5	26660.7	46328.5	76174.8	31487.7	41113.4	45121	54943.3	49935.4	57775.1	31470.9	18341.1	37224.5	36647.2	25601.7	69353.6	52068.8	55486.1	66931.5	80228.4	46106.2
POS	M117T297	117.071	296.721	268939	263831	276051	283103	313668	313643	274986	281642	218997	309128	285826	331933	311447	300399	245186	403542	316300	260720	298380	280431	254415	225317	250065	291699	331450	273448	290646	234770	248132	229808	268202	369953	281039	253083	278296	331495	348635	312155	290514	279851	264340	287787	277002	302036	270808	280065
POS	M117T151	117.076	151.196	3790.28	4406.32	1863.45	13336.3	5558.48	2662.97	3722.99	6781.4	8716.61	12686.4	7945.17	5363.54	15682.2	5217.6	4637.81	13325.6	9192.12	6411.6	1693.59	1871.76	2587.25	9253.31	15674.2	4455.96	8109.32	2162.61	12902.5	3987.65	4038.79	16374	7882.77	5018.09	6524.43	5098.56	4854.03	17912.9	3997.77	7454.09	1992.65	2073.44	4617.08	12160.7	16433	5134.82	7093.75	1129.57
POS	M117T43	117.088	43.093	501007	170689	544814	368852	2657.08	8561.66	135171	6482.52	15113.4	7759.53	744.69	10721.3	1752.06	71001.4	20385.7	63029.4	12960.7	1019.76	1097.43	18556.5	4905.67	12584.9	12669.8	11578.4	15342.4	622.717	11909.2	10590.9	11735.9	16876.8	15520.8	843.687	10728.1	15373.4	64828.6	68588.4	192291	15612.5	61153.5	6428.37	12272.6	5805.47	11170.6	7040.5	69800.1	7188.15
POS	M117T40	117.1	39.8505	306391	80335.8	391158	231916	269953	107469	100111	199901	311876	53654.5	10382.2	45872.9	88344.5	45261.5	106737	34572.2	28357.7	62783.5	7988.26	11969.4	3831.93	7412.85	8431.85	6711.56	5764.71	7638.04	6954.09	6149.39	13436.6	9647.07	10258.4	57010.8	8022.35	51540.7	42327	40497.3	115935	11005.5	39572.7	1956.14	9702.83	18087.4	29513.4	8582.47	45807	9575.78
POS	M118T261_1	117.73	261.437	29561.8	22221.5	22903.8	24952.5	24832.2	10834.4	23976.3	19847.3	22229.4	22216.6	30236.6	29982.1	20834.1	22236.8	28517	27310.1	27442.9	16763.6	23431	28343.1	24196.5	26009.7	35845.5	22175.8	30189.6	27895.8	25391.9	24985.5	27320.6	23364.3	34907.8	24933.4	32795.3	30373.2	29159.5	25896.2	32230.5	25842.3	31403.7	23238.3	20915.6	28247.1	25097.6	26012.7	21753.7	32798.2
POS	M118T358	117.985	358.373	2126.96	2228.59	1660.63	2438.67	1886.68	1453.34	1413.14	1595.16	1487.3	1663.02	1948.26	2523.66	2466.59	3023.08	1782.06	2755.15	2030.94	1626.4	678.263	1880.77	1465.34	1361.78	1679.46	1464.72	2614.17	1596.54	2252.02	1500.47	1814.31	1812.62	1766.91	2183.09	2124.24	1500.83	2257.5	2579.06	1843.5	1715.94	1630.3	2011.31	2112.1	1887.21	2012.92	2502.42	1862.52	1974.24
POS	M118T196	118.03	196.487	4375.55	6090.99	6841.87	8622.56	8036.82	5343.82	8936.17	6382.18	4959.84	11481.9	5446.24	4730.07	3283.5	3887.61	8212.08	9360.55	5596.35	7308.57	7145.36	6876.62	5705.83	8900.37	10184.8	4984.32	7448.43	10446.2	4121.47	4919.61	7700.55	6601.19	2366.61	8277.22	7020.16	6402.23	4619.5	5004.68	7452.88	6070.98	8213.79	4778.73	4702.22	6574.55	4374.67	5553.42	8691.76	5212.48
POS	M118T373	118.048	372.667	10102.2	6590.47	13556.6	6444.87	15321.4	10572.3	10557.7	13854.3	19518.1	4124.92	11882.1	15981.1	15916.7	6885.7	27227.5	11544.2	16756.3	13033	9157.04	12635.5	6704.14	5643.75	7456.16	13093.4	11293.5	7466.89	15466	12717.9	10025.7	11733.7	11645.5	16243.7	4581.29	7488.46	13233.3	10303.4	5374.38	13128.2	9810.23	9841.93	11455.6	11826.6	9186.54	23990.3	15287.2	5843.12
POS	M118T335	118.059	334.959	8327.51	39421.7	16617.9	12533.3	14116.9	10582.9	11619.6	22069.7	21138	16853.5	12368.3	9571.4	6987.84	14126.6	9249.03	11431	14984.3	14374.6	12793.9	16335.5	10289.6	20380.5	12407.8	7912.86	15779.5	11724.3	14328.8	8171.2	13609.7	7080.38	15903.3	9861.08	39487.4	16900.1	17827.1	7926.74	4040.75	15229.6	13056.4	9243.76	7465.67	12094.4	5210.68	7544.22	11091.6	15381.8
POS	M118T239_1	118.063	239.369	110406	110702	122495	142631	125961	113051	103404	117006	112880	100959	129697	139511	151217	118386	105423	134937	102015	94011.5	115317	109362	120226	86400.9	97894.7	98822.7	109400	93573.5	97878.6	121735	121401	103610	126063	123876	151494	104593	108802	131030	102594	114021	110912	130006	162065	111474	121195	135285	114375	132566
POS	M118T182	118.063	182.41	7885.12	10538.9	4784.72	25748.7	13284.1	7427.26	9242.11	12077.8	16083.2	24643.6	14960.4	16176.1	35081.2	9998.94	8438.37	26244	16605	10373.3	3733.62	3979.7	5923.6	15929.1	29508	10152.9	15536.3	2862.05	19661.4	8767.75	8576.74	21968.2	12943.9	18652.1	16489.9	9417.23	12010.4	32572.9	10461.2	13229.4	5274.24	5829.24	13409.7	22884.8	35337.5	10052.4	12333.2	2892.36
POS	M118T36	118.063	36.1895	6495.46	13036.3	6858.58	25769.4	30137.8	7627.86	20660.8	4705.66	24480.6	13538.2	8665.83	16893.8	12743.7	9871.27	10530.3	10104.6	12786.5	8911.42	4572.36	6644.62	6466.74	5392.07	10463	11761.4	7376.87	8582.31	10891.5	11943	8640.09	12373.7	12300.1	17134.4	9847.46	10383.9	8043.83	12792	16395	8656.36	8981.19	4864.75	14092.7	11124.1	11477.3	11222.9	13316.4	12894.8
POS	M118T297	118.073	296.939	38280.7	25030.4	27897.1	38706.8	35010.2	44845.2	35414.9	25165.8	25779.1	41989.2	27328.4	22923.9	29901.7	25398.8	10643	15864.6	25575.2	5121.46	30927	27625.8	6921.46	6277.51	9215.85	21826.5	26229.6	37970	36748.3	6675.74	8481.62	5448.64	9051.68	35894.8	33810.5	26447.2	28550.3	12601.5	30553.8	21664.1	13324.7	6299.27	26097.4	37149.2	23196.4	25435	10113.9	25609
POS	M118T285	118.085	284.743	2.14754e+06	1.34834e+06	1.20394e+06	2.28237e+06	2.58688e+06	1.87445e+06	2.61281e+06	1.84944e+06	1.7329e+06	1.7656e+06	2.29201e+06	2.14438e+06	1.31839e+06	2.63158e+06	1.89024e+06	1.22418e+06	1.79951e+06	1.77052e+06	988029	2.0316e+06	977678	1.7358e+06	2.03998e+06	1.63161e+06	1.94946e+06	1.84498e+06	1.85834e+06	958232	1.87964e+06	999529	1.99927e+06	2.03113e+06	2.36056e+06	1.90472e+06	2.06392e+06	2.25456e+06	2.10284e+06	1.41955e+06	2.21051e+06	2.0931e+06	1.20785e+06	2.50788e+06	1.1386e+06	1.01941e+06	1.03303e+06	2.7834e+06
POS	M118T261_2	118.085	261.315	1.28422e+07	9.72881e+06	1.04425e+07	1.37341e+07	1.31553e+07	1.1283e+07	1.3384e+07	9.67396e+06	8.67613e+06	1.18772e+07	1.49246e+07	1.41834e+07	1.27222e+07	1.21663e+07	1.1278e+07	1.23704e+07	1.33685e+07	7.21684e+06	1.069e+07	1.3469e+07	1.11498e+07	1.36701e+07	1.53321e+07	9.55784e+06	1.32462e+07	1.1448e+07	1.15492e+07	1.13787e+07	1.20754e+07	9.95206e+06	1.50361e+07	1.33968e+07	1.44393e+07	1.32075e+07	1.28064e+07	1.10506e+07	1.44945e+07	1.19426e+07	1.46003e+07	1.21785e+07	1.00139e+07	1.37117e+07	1.22242e+07	1.19535e+07	1.18304e+07	1.54879e+07
POS	M118T63	118.084	62.583	19473.4	18323.1	19510.8	21620.3	27378.4	23149	26589.4	30793.5	22335.1	17864.5	18034.1	28732	29558.9	22554.6	22445.9	15601.6	19858.9	21920.5	20573.6	23787.6	25367.3	23867.2	17072.4	22881.3	20616.9	12079.4	21766.3	19404.1	19166.2	16168.3	23331.3	22357.9	25605.2	22874.7	20948.3	26693.8	21842.9	24313.5	18659.9	21734.6	19463.7	15926	24732.2	17992.9	24111.8	31637.3
POS	M118T317	118.084	317.321	234879	117317	374777	237198	228372	478341	218653	217701	195563	161688	176938	310045	174371	131316	169222	178926	142131	132691	163208	153246	117141	121160	135855	139791	131385	163581	141819	129054	117300	124296	355102	158969	136823	278352	216347	154927	301938	246952	161028	298779	149284	183637	191839	147891	150783	316614
POS	M118T239_2	118.095	239.165	160.691	4117.5	63.3548	192.104	54.12	377.481	114.171	4826.35	4407.83	3872.2	4883.53	5186.74	502.439	4885.61	4241.96	5502.58	8584.88	18.328	4624.74	4560	4955.17	3468.55	3979.38	4011.29	4572.97	3668.59	3776.14	4266.75	5305.38	4136.97	5504.8	4936.76	6562.67	82.3397	76.7084	5433.49	110.417	4330.93	9251.29	5161.1	6361.83	122.185	73.1105	5446.21	56.6281	5662.59
POS	M118T25	118.099	25.127	1024.64	716.943	1670.07	1673.79	1836.87	985.437	1864.82	899.93	870.801	1346.67	2114.71	2458.66	612.964	2149.44	718.413	571.161	1786.87	1279.99	1843.11	2079.29	1550.46	831.822	1821.26	1209.37	553.644	882.578	867.17	2044.75	646.082	1804.2	1093.31	1163.2	419.892	1745.71	875.736	939.52	973.757	1943.77	720.938	932.472	497.19	830.192	1825.11	758.949	1338.81	1088.52
POS	M118T40	118.103	39.847	21475.1	8429.24	18438.2	16568.3	16224.2	6494.2	8824.29	10729.4	16227.1	3022.36	2111.23	5600.29	4601.65	2736.27	5452.99	2311.6	3449.35	3347.81	1720.06	2479.81	2202.68	2121.1	1471.58	1493.73	2269.57	1920.07	2749.73	2736.02	3454.05	2018.65	2625.54	6131.92	4204.47	2966.61	2478.33	2086.69	7647.51	2068.97	4430.4	2637.38	3750.06	3134.07	4093.44	4112.32	5014.06	3541.9
POS	M118T26	118.136	25.501	3037.67	2864.59	2971.99	3160.62	3176.38	3202.31	3026.93	2934.97	3262.63	3239.17	3148.68	3063.14	3199.92	3058.63	3612.31	2948.24	3015.35	3067	3019.79	2986.96	3257.02	3342.8	2966.73	2406.31	3177.39	3237.1	3016.03	2779.93	3072.81	2702.96	3369.4	3111.4	3088.36	3068.85	3217.87	3319.7	2984.87	2916.21	2787.95	2859.32	3371.86	3371.68	2797.33	2989.43	3202.88	3078.08
POS	M119T262	118.73	261.893	2263.25	3616.96	2655.43	4677.14	2886.55	2995.48	1733.73	1384.81	563.709	3855.54	5528.35	5078.96	1694.67	4378.7	4785.4	3830.49	4398.52	783.713	2239.74	2314.94	1795.2	5002.96	6216.95	3280.12	2367.17	1221.35	3846.06	2207.49	6112.07	3081.19	5395.6	2398.48	5487.92	4668.78	5432.68	2524.46	5416.37	3817.15	5910.08	2077.64	3133.49	1816.99	1423.84	1387.02	5396.28	5114.47
POS	M119T358	118.993	358.4	518.169	626.018	481.857	599.96	719.622	589.959	633.018	393.671	518.534	590.667	417.142	800.96	548.153	808.868	605.242	697.469	510.015	775.313	669.51	535.592	541.644	510.057	743.306	475.49	607.151	562.234	655.698	666.017	452.903	560.821	561.74	670.106	784.344	514.392	554.771	734.779	573.176	479.558	768.112	456.076	762.254	714.117	729.135	522.532	504.221	573.374
POS	M119T280	119.014	279.904	39222.7	20457.5	16336.2	15333.5	47121.6	23879.4	40600.1	27994.1	19636.6	21508.8	37789.8	23465.3	20167.2	23567.3	20144	33681.1	27373.1	14495.4	26104.2	27892.6	36500.4	50574.6	24838.2	17770.2	24079.3	12674.1	14577.4	20212.3	24292.5	17315.5	34236.3	16759.9	61662	18324.6	24992.2	38127.8	22216.4	46402.8	48479.3	20996	28973.4	46702.3	25062	32292.7	17432.9	25117.1
POS	M119T304	119.014	304.127	6477.45	4015.11	2779.11	3884.44	8543.66	7632.74	9334.78	4483.98	4324.34	7023.8	6303.51	4063.26	5015.18	4552.43	3611.95	4419.04	6849.4	3389.92	6085.02	4934.72	5896.76	8623.09	4715	4280.53	6214.17	4564.3	6082.25	4379.05	3132.44	3490.02	5552.03	5272.3	8975.41	6164.93	3892.47	5338.03	10657.9	7108.79	6971.17	8227.95	4993.58	10457.1	4815.25	6558.74	4290.22	5124.89
POS	M119T161	119.033	161.034	1759.39	50191	9377.92	6826.99	19467.2	6548.26	7281.55	11452.3	7970.35	10156	5710.3	2742.19	5734.5	6708.81	8293.52	12625.1	11302.4	5243.07	15554.3	11959.5	8908.57	9171.19	10069.6	6731.48	8052.15	11531.5	4810.12	23140.5	7385.69	14695.2	9593.07	7394.33	51837.6	12345.4	10155.5	12551.9	8753.44	8694.64	9012.43	11606	17428.3	7380	8452.19	7363.87	10589.6	4567.26
POS	M119T282	119.047	282.204	84591.3	88687	91510.6	94306.2	99762.4	123026	74096.3	86850	79166.6	85515	89200.3	69000.7	131876	82129.2	71884.5	84573.4	88548	102289	96056.1	73344.2	88314.6	62434.7	88584.9	82067.5	88831.6	93460.4	110096	91989.8	89091.9	82266.8	81566.2	113875	111357	81652.5	63426.8	103277	100176	77521.8	83326.4	87214	124419	101067	90331.6	91236.1	85050.8	81683.5
POS	M119T44	119.058	44.4105	38036.4	171647	12523.9	25246.5	77087.5	16767.5	20348.2	2928.15	13332.7	2233.24	8128.91	4294.65	8415.26	5530.69	8000.93	3286.54	3550.67	4548.56	1388.3	7540.88	6538.84	6588.41	8637.53	7167.35	6821.31	7401.91	7788.83	6578.47	6260.62	5525.96	6605.34	4266.09	5602.61	7626.41	6886.37	10193.8	9544.22	3025.72	3654.15	10942.7	7114.83	7819.5	11451.2	8562.43	4479.09	8411.24
POS	M119T239	119.068	239.398	11517.4	6765.32	13668.9	13901.4	14236.4	11947.2	13887.9	11098.2	7962.05	17171.3	10447.4	16444	19365.6	10831.5	9988.17	10830.4	8125.95	11235.4	10895.7	7052	9817.86	9527.81	7935.08	9296.23	8449.77	2067.91	10873.8	8458.4	6104.71	11847.1	8593.32	14751.9	15087.7	12286.7	10060.7	14979.2	13915.3	8608.11	8731.28	11343.3	15955	11880.1	9859.12	8299.89	12824.1	7326.44
POS	M119T261	119.087	261.346	564860	435086	484932	605387	593285	489175	606816	445872	400782	521103	676927	601307	583583	523916	519767	529710	590514	314863	472124	580656	482502	608108	684739	430489	566441	533647	514040	503155	567036	457321	676767	594060	692767	575757	555635	514858	622331	527565	633229	526054	445517	591853	530677	514071	515044	668966
POS	M119T35	119.083	34.742	56958.5	168398	104343	66408.8	79037.5	77040.1	74583.1	47313.2	108255	95475.6	7995.93	4996.8	8827.06	5904.97	8565.27	8805.83	5940.48	6158.71	9116.93	6657.87	8668.41	11280.7	2900.8	5539.59	7212.97	9297.61	8120.63	7836.39	7738.43	4147.33	8244.09	6123.35	11648.4	5340.86	8638.91	7405.65	6206.44	8952.58	3826.3	11405.9	7207.24	8555.55	11257.1	9397.69	6011.61	5831.79
POS	M119T285	119.087	284.81	104734	62899.1	50980.2	119049	42519.1	42440.5	126281	40306.3	90124.8	88202.8	109389	101003	51844.8	119665	95449.5	47695	91933.1	36144	87443.1	100725	39097.4	82590.3	100921	37926.7	94692.8	85357.4	85137.3	41220.2	93351.8	44366.1	99321.4	104838	43089.1	93721.7	106122	103856	101728	83363.1	108127	93795.1	46842.5	106717	46094	40412.2	45298.3	132468
POS	M119T29	119.099	29.119	9449.54	4310.32	4502.69	3609.2	4256.29	3702.5	5451.38	3163.53	2365.64	5696.59	3833.42	3059.45	2220.63	3990.9	3518.41	3914.61	4467.17	3636.78	4037.65	3449.34	4093.26	6590.05	3758.3	1487.28	3684.4	2479.13	4297.56	3394.83	3027.4	3893.76	4404.67	7029.1	6991.73	3816.46	2237.19	4282.54	4024.89	5121.48	4167.33	4357.45	3839.58	10765.8	4421.16	3599.76	3049.63	3493.3
POS	M120T240_1	119.719	240.026	4525.87	7795.08	8269.65	8872.35	7705.04	6404.28	6354.69	5473.01	6163.45	8249.57	8705.7	7163.33	7960.56	6911.17	4438.81	4724.28	5583.8	5985.32	7629.03	5560.39	7520.08	4752.78	7774.92	7368.15	7575.36	3739.61	6623.19	7108.59	7298.08	7012.34	7941.25	6128.25	10869.8	4541.2	5107.37	7701.99	5620.2	5010.09	7914.48	5459.46	8057.77	5858.46	6664.72	3180.36	7226.72	7394.34
POS	M120T33	119.991	33.492	5705.88	11059.7	3530.77	10710	14798.9	2525.37	3775.07	2003.84	4705.14	2687.01	1044.57	633.49	2240.91	3601.38	1700.71	1003.1	1038.19	4224.62	1057.03	1730.14	2507.54	1460.92	1707.28	1291.4	1387.99	1033.6	901.379	1439.71	2858.16	1763.84	1622.74	2172.1	1643.34	2854.54	2917.56	2632.42	1317.96	2382.42	2147.86	1683.39	2120.1	2398.9	3808.94	2069.38	2418.23	3009.44
POS	M120T347	120.001	347.301	12883.1	18010.8	11109.8	18681.8	18602.7	11688.6	14193.6	11982.5	11704.5	15902.9	17297	19379.9	20693.4	29503.8	15041.3	16504.9	17449	12263.3	12788.7	12742.2	10658	9974.54	11774.9	12315.6	19456.7	10078.4	15915.8	16193.3	13806.8	14790.6	11446.3	20493.4	16568.6	12578.4	19904.7	17789.2	14691.8	18238	13703.9	11506.9	19513	16102.1	12498.9	12457.2	19454.9	16239.8
POS	M120T314	120.009	313.94	3644.41	2610.29	3976.84	5639.98	5495.22	6541.45	3078.29	3543.63	3372.94	2853.52	4162.09	4773.66	8674.42	8390.04	5529.08	7646.73	3274.85	3859.7	4231.8	4357.89	3899.2	2326.7	4495.16	3185.99	4580.12	1231.96	3626.11	2840.75	4508.18	3045.55	4282.65	3685.28	3950.96	3629.51	3042.15	5568.69	2961.42	3721.49	4017.26	3873.88	7855.42	2153.51	5272.11	4294.3	3885.91	3707.78
POS	M120T280	120.017	280.063	1350.16	1176.91	1513.24	630.925	2780.18	1857.03	2220	985.36	684.387	3542.85	2001.47	1643.71	4401.58	1815.16	1142.95	1851.55	981.33	1154.6	1558.13	1230.98	2289.21	2482.34	953.284	896.088	2150.97	2655.54	2388.33	1181.4	1896.97	848.414	1818.55	1495.76	4505.73	1128.13	1480.6	1279.56	728.537	2913.97	2540.43	390.449	1483.78	2109.44	470.805	5963.65	2154.72	1773.72
POS	M120T160	120.017	160.352	113.818	3014.86	199.811	197.022	729.681	321.123	292.469	744.71	255.999	549.211	168.938	342.216	112.051	199.109	250.342	256.514	536.184	147.536	913.196	545.56	231.924	609.268	855.441	177.228	250.088	582.073	119.056	522.182	221.527	844.205	322.493	184.216	2253.58	394.382	340.605	519.027	219.427	309.19	455.588	886.318	530.924	101.53	318.778	425.004	421.047	399.317
POS	M120T303	120.045	303.493	12577.3	9836.89	9891.7	5736.68	10013.3	6655.98	7503.76	9890.85	9029.21	8799.49	13699.8	8098.73	6081.51	10768.6	7964.99	10023.1	6665.13	4786.84	8072.22	9023.06	11045.6	7697.87	10713.3	5330.62	14628.1	7715.24	6626.52	9675.48	14538	6090.47	15158.1	17298.7	10785.9	6007.93	7215.25	10371.1	6586.11	7415.9	9719.36	6796.05	12589.4	5394.56	7263.45	10242.3	8989.96	11163
POS	M120T283	120.05	282.626	3991.37	3876.28	2691.28	5521.46	5007.09	6786.36	2698.73	3050.54	2854.15	27715.1	17831.3	4992.58	6466.52	5222.56	3285.99	5958.32	14257.7	15601.1	4170.46	3438.53	4337.4	2812.46	4151.56	3726.42	11279.9	24741.5	4924.58	4161.83	5200.14	3828.46	3150.65	5001.65	6279.9	4041.13	11213.8	5755.24	5051.1	11741	4853.16	4184.03	7209.22	3978.12	5694.55	4772.48	4047.1	3689.98
POS	M120T338	120.063	337.925	63178	47479.3	74085.3	79295.7	64711.5	43220.6	20387.2	48826.7	76321.4	91821.9	23755	43392.7	43755.2	67723.6	18344.4	79594.3	45300.8	18696.8	46813.7	52915.9	50605.7	25222.7	42276.3	21374.3	28455.1	19044.6	65691.8	24778.9	71216.3	42342.8	64446.7	19385.2	42416.8	59125.2	67793.6	52868.3	10978.4	63237.3	18679.6	48239.5	40042.4	75503.2	28680.3	57903	65383.6	16659.8
POS	M120T142	120.053	142.331	18637.7	254233	61963.8	16947.4	35221.7	25480.7	30000.6	43026	62897.7	14249.7	16796.5	25715.5	36510	22197	116032	28401.1	20183	71869.3	19268.5	25812.2	22170.2	19036	21024.4	30827.8	20429.3	2788.12	23573.3	20544.9	39879.4	15672.8	19732.7	20427.4	11849.8	11074.3	32699.5	29161	17050.5	19902	14001.3	27225.5	34451.7	28275.5	20905	29200.8	1395.08	15365.9
POS	M120T240_2	120.08	240	2.81162e+06	3.8741e+06	3.47493e+06	3.58938e+06	3.21128e+06	2.90518e+06	3.33963e+06	2.59909e+06	2.51453e+06	4.94501e+06	4.06028e+06	3.42637e+06	3.67389e+06	3.05493e+06	2.46116e+06	4.09616e+06	2.81486e+06	2.84706e+06	3.33472e+06	2.53567e+06	2.99089e+06	2.1937e+06	3.1445e+06	3.01106e+06	3.28668e+06	2.36745e+06	3.03273e+06	3.15789e+06	3.15787e+06	3.03372e+06	3.85977e+06	3.21065e+06	5.20238e+06	3.02131e+06	2.58131e+06	3.30007e+06	3.14982e+06	2.65962e+06	3.25059e+06	3.07712e+06	3.68498e+06	2.8256e+06	3.20006e+06	3.25872e+06	3.15903e+06	3.061e+06
POS	M120T24	120.069	23.6645	575.551	680.67	782.244	3533.15	730.037	725.509	1789.97	734.205	3901.59	606.31	2232.11	718.146	775.463	2352.1	2385.93	783.217	608.352	1810.21	693.218	2944.8	861.606	606.63	688.835	2235.57	524.801	1999.01	675.368	2055.25	795.714	7229.41	719.064	554.036	804.928	641.966	646.347	756.713	600.323	812.606	2122.86	793.746	2173.12	577.43	596.408	714.192	536.711	2024.24
POS	M120T262	120.088	261.765	39121.3	22096.7	30858.5	47222.3	49661.1	26764.2	42180.8	20701.5	29103.2	127898	45939.1	31140.3	28951.5	40408.9	40697.9	42016.5	31552.5	72335.7	67995	43838.3	31660.3	44069.1	47660.3	27049	623530	150275	36879.2	35075.1	42022.6	37613.3	52695.4	90703.5	45295.7	80664.7	37542.3	38513.9	132159	39881.4	55730.2	26638.7	29674.5	24343.8	33963.8	33351	33157.7	45735.9
POS	M120T25	120.094	25.355	3205.16	3154.89	3614.14	3771.74	8921.95	2619.95	3437.7	3383.88	4282.78	8424.49	3866.5	3520.82	3540.94	5139.62	4860.2	4911.03	3881.69	3373.2	2947.82	3956.27	3429.11	3203.7	4404.83	4327.54	4230.31	2960.37	3178.54	4136.12	2992.32	3942.41	4097.71	2748.79	4385.45	4121.79	4415.35	4101.57	2950.37	3714.78	4145.97	3898.54	4589.67	2991.92	4103.69	3386.5	3754.01	3786.81
POS	M121T240_1	120.716	240.081	1065.78	824.245	744.014	533.443	804.784	846.409	700.736	459.563	1009.54	1931.92	1517.11	1083.03	1330.59	1157.5	841.391	476.301	679.55	1113.96	1288.77	899.199	1075.29	753.947	668.378	1213.22	949.289	926.202	1140.61	493.501	1242.67	1050.87	1394.09	545.722	1575.84	724.371	707.396	579.626	1251.72	911.01	1295.35	1291.5	1680.77	1244.66	1200.64	899.552	1088.24	1431.45
POS	M121T350	120.964	350.402	5424.45	1365.98	3876.01	6524.03	6712.69	5736.44	5284.62	5570.67	1991.99	4121.96	5356.12	5340.16	8435.07	6796.46	5959.72	6352.29	5905.55	6167.76	6474.77	4238.42	5634.19	3637.3	3509.09	5877.69	5587.16	5221.82	6139.29	7626.73	5265.78	6192.65	3645.57	6999.16	2157.1	4180.76	5538.94	7081.39	9224.2	3929.51	5382.52	5785.15	7844.55	5342.66	7119.38	7209.09	3877.84	4946.87
POS	M121T280	121.01	280.108	2339.31	1038.92	584.157	734.869	2550.98	874.248	2233.14	1530.11	1203.55	846.252	1760.39	1259.58	944.329	1312.82	1132.49	1999.49	1918.26	711.524	1644.74	1195.04	1890.52	2654.51	1452.81	1693.98	1070.28	567.335	1392.81	721.545	1013.12	949.227	1825.48	1172.38	3131.83	880.72	1292.23	1815.2	1222.6	2817.56	2387.79	1258.05	1817.7	2189.79	1360.66	1789.58	1658.76	1904.82
POS	M121T224	121.026	224.102	4607.89	2702.05	5988.42	4890.23	9935.82	12088.4	3808.02	3597.3	25726.7	4530.57	5741.91	5772.95	12146.2	5414.66	5683.9	4810.96	3278.48	6018.75	3794.27	6275.78	5961.25	4765.21	4051.62	6826.56	5961.36	5697.82	3912.98	3085.37	6922.01	4330.09	5175.38	4187.23	4035.61	4918.73	5168.48	3423.26	4412.55	4419.62	3440.18	5251.21	9499.97	6595.44	3597.51	7241.03	11451	5103.48
POS	M121T271	121.037	270.551	5887.83	5215.68	5894.03	7776.34	6942.59	5296.77	5542.51	7464.91	4617.5	20749.5	8936.24	7697.97	5588.26	13420.8	6994.04	5675.29	1585.38	8019.74	7552.99	10583.7	11444	7548.37	7823.22	8015.17	6892.47	9131.21	4726.33	11511.7	7010.53	8188.67	7796.62	9043.5	6461.48	11798.5	31455.3	13678.6	10035.8	4839.13	5228.78	3653.83	20603.5	5352.45	6712.45	4328.3	6018.12	7451.83
POS	M121T182	121.037	181.642	1191.39	1949.68	1128.04	2545.31	949.392	1355.27	1570.68	1124.38	1176.43	793.759	15515.3	2992.69	1827.05	2759.77	952.905	2005.25	1100.07	1082.07	1050.82	1222.26	16405.4	1343.2	2344.26	2520.37	959.162	1450.32	708.253	2244.26	1259.97	2286.03	2322.19	1229.41	2137.31	5209.13	28633.4	1813.57	1988.75	1193.66	1823.42	1337.53	25784	2981.1	1743.76	2056.58	1481.44	2591.53
POS	M121T283	121.062	282.675	9092.88	9928.22	9221.19	10335.6	13970.6	14962.2	9070.19	9969.59	9112.42	9365.48	10147	11299.1	17604	12345.2	8062.57	11262	8724.43	11910.3	12126.3	9880.35	9298.13	8111.49	10738.6	7810.67	9727.8	10495	13003.2	9381.65	11380.5	9790.59	10223.2	14447.3	15527.9	9469.37	8746.54	14035.9	15790.6	8971.01	9339.85	14529.3	16239.1	11809	12226.7	8173.71	9852.43	10117.9
POS	M121T34	121.062	33.59	5334.58	3328.9	3929.5	6468.03	3423.39	766.775	4019.04	3135.92	1454.33	3338.17	4954.84	2515.34	4329.4	3491.37	4957.32	4383.58	1752.18	4713.65	2004.62	3152.24	1685.82	3149	1693.61	1894.45	3543.23	2868.95	1171.85	1870.5	3207.55	3986.64	1228.6	3962.38	4561.42	4817.59	5094.16	3859.93	3582.02	2690.28	3479.78	999.919	3326.8	3997.05	3715.28	1979.29	2792.72	4173.1
POS	M121T103	121.069	103.447	3459.81	3862.12	3063.31	1409.15	3462.45	4614.29	4738.82	3937.99	4669.51	3190.78	2271.68	4379.12	2521.5	2068.49	2491.35	5010.88	2709.22	6639.07	1198.85	3104.3	1782.97	2161.37	2453.78	5039.95	2952.53	2454.24	3114.27	4472.91	2610.61	2171.31	3180.02	3684.95	5656.72	1783.69	2314.21	4632.66	3732.43	6842.29	1890.04	4552.73	5291.31	1811.91	5524.63	3950.21	3530.66	2900.86
POS	M121T240_2	121.082	240.009	199613	249542	238740	247608	221893	203493	228049	192308	196653	341774	274831	228445	259117	214613	175872	278696	203112	200448	230059	176274	209240	151048	215958	213152	226194	166169	216058	228987	215211	219555	265936	218598	354714	188324	175534	233820	227037	193800	214930	216505	255321	202555	216863	219445	223682	214809
POS	M121T143	121.074	143.351	5756.41	19672.2	8618.89	4550.63	5659.19	8225.92	6396.54	5188.17	4753.41	4670.37	3804.95	5373.37	6821.46	5236.17	6011	5842.21	4983.56	5303.89	4526.01	5123.61	4884.84	4530.26	5375.54	10180.1	5015.97	5156.47	5314.3	4823.69	3751.85	3890.26	6276.3	6814.48	15784.5	8855.44	9046.25	2571.75	8364.13	6880.85	4735.3	5091.99	8360.08	7778.71	5813.33	11679.6	8483.46	10526.5
POS	M121T45	121.099	45.1175	13754.3	3353.34	7683.21	10559.7	9805.47	10240.8	8896.51	5620.08	9753.11	716.828	14462.2	4281.02	11837.3	10737.9	6924.68	12178.3	10678.5	6458.88	7466.7	8471.11	10140.6	6966.64	7862.26	7456.63	11015.7	6242.42	9804.61	4870.79	6834.41	8783.78	11672.3	7829.87	6404.3	9107.35	8898.36	11107.4	9809.75	8729	5290.91	8933.44	8034.81	16463.4	9656.5	10275.3	12112	14948.7
POS	M121T28	121.114	27.8585	980.637	1305.5	1176.78	1070.94	1230.26	1123.55	1023.04	1419.54	962.709	1176.8	1493.48	1136.67	1964.61	1349.3	1271.33	1204.66	1301.85	1360.25	1420.31	1148.99	1191.92	991.319	1150.37	2245.25	1485.95	909.763	877.576	1223.84	1043.33	974.159	1502.94	852.53	1153.54	1685.62	938.863	1088.9	1186.28	1230.16	1055.69	1052.34	1194.4	865.659	1180.99	1265.05	1010.69	1571.23
POS	M122T270	122.041	270.422	412.192	321.931	449.951	389.786	471.951	381.83	453.32	455.773	315.13	1418.48	438.831	448.002	474.528	1028.19	381.016	485.349	116.281	621.029	517.769	361.765	678.49	492.033	483.359	659.314	420.739	576.12	398.123	736.24	371.56	529.993	372.784	411.731	396.163	663.413	2443.39	750.995	525.028	270.194	327.783	208.114	1248.16	335.346	374.9	326.28	491.754	477.246
POS	M122T25	122.054	24.895	9999.32	689.771	536.645	9741.55	635.11	441.877	8243.55	435.465	489.485	6733.7	13020.6	532.07	13197.5	5263.23	2117.5	11525.7	8019.19	8483.05	638.594	8837.72	9048.34	427.25	12217.9	10690.2	648.653	6734.15	1004.56	8355.54	11321.2	11107.8	8294.82	673.21	9330.71	9640.48	4590.29	12792.3	1260.69	8024.57	11208.6	8303.62	8612.08	8189.09	3064.35	537.469	9849.65	501.691
POS	M122T314	122.069	313.971	5408.77	6483.21	5640.03	8111.42	8350.34	7262.15	8620.81	7294.16	6720.6	4086.5	8665.43	8517.81	8755.49	9364.08	5852.74	8613.48	7543.03	6026.23	7992.86	5422.27	7708.39	1171.97	6703.35	5781.94	7646.73	6804.53	9044.34	5912.81	9182.74	7888.02	6656.54	4814.74	8517.85	8327.03	8095.48	8919.48	7565.7	7119.53	8006.36	9869.03	9398.74	8275.87	7809.41	6846.31	4772.77	8514.15
POS	M122T44	122.069	44.423	23819.5	85268.3	17587.8	18935.9	21111.6	22766.7	27414	31895.6	18858	24954.1	24737.4	20901.1	23857.7	18760.3	36980.8	32502.1	26739.7	19147.1	27556.7	26696.5	34255.2	27404.9	28813.7	19595.9	30478.1	14173.6	23142.7	29893.4	39929.9	35601.6	40159.9	20853.4	22780.1	41374.6	36653.6	23460.2	15540.7	34288.2	29092.2	27795.8	19017.7	32460	19198	20487.4	27819.5	21785.2
POS	M122T280	122.079	280.016	31085.5	26379.5	26528.7	37773.9	42124.2	25587	30913.7	33779.6	25677.1	31986.2	48484.1	75684.4	36058.6	33894.8	27724.5	28833.9	27269.4	34096.3	33047.4	33904.7	30992.3	51560.1	33033.5	37534.7	31045.3	30906.5	31813.7	49044.6	28291.3	29785	26834.6	30341.3	55115.4	36429.8	53095.2	31505.9	32945.5	33659.7	42210.4	30837.9	38862.8	31301.9	32587.9	34358.5	36087.4	39323
POS	M122T24	122.074	24.169	679.773	1926.26	852.859	479.447	5599.44	552.595	6426.63	1070.46	8219.02	5426.66	4599.8	8088.69	786.073	10721.9	9430.16	9334.82	4266.67	6215.3	7391.12	8872.42	878.419	5128.25	574.549	1084.74	4334.78	6489.45	9082.34	6559.07	1249.34	9782.64	8761.58	6663.41	7237.22	660.61	8807.14	1016.73	814.212	943.564	8840.65	717.366	1045.27	506.526	1107.01	637.952	723.922	8315.8
POS	M122T240	122.085	240.082	7649.71	10477.5	9266.33	10327.3	11110.6	8035.57	11504.1	8691.78	6936.76	13424.7	11768.4	9870.86	10918.1	7225.5	7650.16	11650.1	8415.84	9000.91	9438.9	6672.45	8529.73	4763.51	8913.05	9124.43	9768.07	6634.02	8059.41	8365.32	8722.47	9099.25	12077.9	9938.65	15759.1	7843.67	7592.3	9154.8	7821.59	6548.8	8227.13	8545.79	11026	8315.32	7837.69	10352.6	8636.08	8795.28
POS	M122T617	122.094	617.159	79435.1	35082.3	67954.5	40050.6	74253.9	70392.9	87735.6	78782.7	90162.6	23862.2	58501.6	136971	38837.1	68610.5	24655.6	33806.7	27366.3	62476.2	39995.6	60813.5	47054.9	49012.1	55585.2	108504	62950.2	57047.7	83883.6	43873.3	67031	35338.1	47998.8	91565	76057.1	37823.4	50621.5	91845.4	52177.4	116700	98432.4	88756.4	2131.34	78911.9	61841.1	121751	72120.1	74916.5
POS	M122T700	122.094	700.234	14742.6	12061.3	16478.1	2507.11	10136.8	15427.6	13828.4	9282.55	15489.4	10079.4	13144.8	4728.24	10797.2	9841.03	17980.1	18832.4	10145	10730.3	11138.4	13954.1	11427.2	11687.8	14617.8	13713.2	13735.4	10117.9	10911.8	12035.2	11820	13632.8	14854.9	10044.5	13630.6	13498.1	13554.2	14023.7	16605.5	11052.6	13071.9	10954.3	12718	10188.5	14218.5	11532.5	19836.5	11614.5
POS	M122T26	122.11	25.861	18529.9	17159.5	21149.4	19595.9	17032.2	14292.7	18344.8	18586.9	19599.1	14609.7	18864.3	17542.1	18199.5	21795.1	21748.7	21041	17165	17102.9	15797.5	17908.6	18849.9	11841.3	18463.1	17627.1	18699.7	14044.2	17014.9	19198.4	20243.7	19501.2	20496.7	12994.1	19162.3	18922.2	18409.8	20457.9	13636.1	18794.1	18650.8	17432	19637.5	13380	20152	18924.8	17211.5	18426.5
POS	M123T55_1	122.684	54.707	714.56	542.354	1154.36	874.06	1820.32	988.269	930.231	1997.84	1741.76	1477.93	4136.18	1719.83	4100.89	4709.11	5273.31	5430.93	2798.85	2958.19	1291.45	4357.47	3910.39	1088.47	5860.02	3054.89	2943.28	2992.96	3768.06	3992.57	5366.68	4659.87	2913.36	1810.89	0	2623.58	4817.97	5312.2	2995.41	3613.54	2448.83	3544.66	4559.75	3614.51	4802.6	3356.75	3808.39	2587.31
POS	M123T282	123.042	282.369	156774	156504	160239	167322	210246	244364	148795	159915	139033	150597	160205	205207	252423	170613	135474	180174	162926	164326	194714	137446	170002	136199	150566	144421	164344	183437	162966	162653	164820	145049	168254	208279	208344	142434	124816	194674	198440	169935	165668	174891	243234	192169	182406	169926	161372	157250
POS	M123T55_2	123.053	55.2735	262696	173958	578086	432972	874559	529655	351356	788373	704930	483499	1.90453e+06	963397	2.42562e+06	2.54004e+06	2.84145e+06	2.45677e+06	2.04442e+06	1.33398e+06	1.33716e+06	1.87105e+06	1.8212e+06	1.41296e+06	2.58912e+06	1.24664e+06	1.20605e+06	945280	1.86853e+06	1.89072e+06	2.74052e+06	2.23919e+06	1.36533e+06	699660	87626.8	1.40777e+06	1.82568e+06	2.69242e+06	1.55057e+06	1.57835e+06	976867	1.34206e+06	1.30907e+06	1.83724e+06	2.77348e+06	1.57137e+06	1.63009e+06	1.20602e+06
POS	M123T23	123.058	23.242	1251.22	5433.12	6244.04	1701.01	8486.84	3523.2	6303.22	3375.77	2461.8	1682.3	3687.44	11186.1	2568.2	854.316	2928.58	2831.06	6236.41	8309.82	2494.85	1269.57	3162.74	3659.08	2834.47	7252.51	4471.76	2662.88	7584.83	6364.93	3942.41	6115.56	3618.92	11987.7	4382.27	851.684	2881.77	1827.42	6597.71	3836.75	5127.77	3293.3	5177.31	3978.82	4233.06	3232.08	2264.76	6148.88
POS	M123T26	123.095	25.988	4555.3	10208.1	7987.47	2602.73	4772.33	3967.76	6517.74	7850.92	2980.65	5218.96	5085.22	18551.9	7405.05	2656.73	8090.81	8383.64	9661.71	6891.15	4648.29	4784.39	5149.86	2628.32	8267.01	1783.34	9205.24	3888.19	2290.01	6479.39	7201.21	12347.5	6137.27	18752	8437.14	3365.86	7341.42	2501.98	12642.9	8689.07	5213.97	7425.05	10824.5	2559.83	2413.71	5360.63	2546.27	4355.08
POS	M123T44	123.114	44.408	7396.13	1277.44	9431.86	7365.56	10317.9	13581.2	15436.9	7755.32	49634.3	12218.1	11191.6	9162.76	20433.9	13464.1	8997.37	9083.66	11026.4	13397.8	9152.13	13214.2	128982	8475.34	14843.6	13463.8	14850.6	8514.27	12288.2	6951	11054.4	13388.1	11693.9	11465.4	4359.04	11776.1	9504.15	15832.4	8581.1	8523.89	6801.72	8746.96	3945.69	9954.69	11795.2	9828.36	10419.9	9856.32
POS	M123T28	123.13	28.0215	1055.47	1784.35	1440.77	1469.73	1244.01	791.41	994.653	1249.04	964.764	3419.93	1480.1	648.57	890.175	2332.94	1378.83	888.679	936.897	3153.05	973.975	1070.03	1123.94	2598.33	466.77	5357.3	1742.92	441.541	659.3	1116.49	350.863	832.112	231.919	922.074	404.112	1309.77	884.274	763.275	871.203	850.717	881.71	1646.42	2433.59	580.071	801.441	410.501	626.311	1137.81
POS	M124T314_1	123.713	313.855	3576.11	2813	5575.08	5546.82	6255.59	2633.81	5987.93	2028.33	2056.19	4118.15	4253.42	6688.48	5888.72	5104.36	4716.85	5888.22	4191.33	3094.06	4329.39	5913.92	4716.83	5531.41	5027.87	4912.86	5315.81	3141.72	6922.58	3594.63	6417.35	6303.58	5876.1	4645.45	5130.41	4125.04	7131.07	6981.86	5012.39	6276.43	5324	5548.94	8764.58	2125.55	6370.75	6097.14	5660.09	5520.52
POS	M124T189	123.986	189.285	792.215	1056.81	558.469	742.089	884.03	469.898	611.263	407.287	493.351	823.897	687.907	865.672	1311.3	1582.6	1213.32	912.92	1178.38	746.152	448.305	699.272	453.103	1284.72	1622.54	500.442	931.661	442.695	553.797	519.27	928.993	413.532	910.463	1149.52	521.483	1114.12	1110.09	1157.22	827.251	877.343	564.869	691.993	514.594	1305.73	1021.41	554.51	846.528	828.526
POS	M124T398	124.022	398.466	14075.4	9793.41	10021.6	11536.9	12372	13663	7970.23	10269.2	10653.8	14575.1	13550.9	12625.6	10575.4	12368.2	11864.7	11963.9	12795.5	9257.22	12166.4	10570.3	11460.2	8830.52	10890.9	13410.3	11139.8	18932.4	9900.61	14065.4	12937.2	11458	8020.03	10916.1	9773.97	10091.6	11735.6	13373.6	11106.8	12558.3	11368.4	10024.5	13894	11336.1	10196.5	9621.05	12274.5	11991.1
POS	M124T55	124.056	55.323	17392.7	10222	26401.7	33187.1	47096.3	39580.4	18618.9	46369.3	42477.6	30455.9	103727	56999.8	125521	121813	131811	119582	110181	63825.9	64639.3	94105	91142.9	67651.6	126214	70254.7	70120.5	58615.3	91577.3	93760	131467	110062	61967	45297.2	4160.21	75201	98508.7	129309	89775.9	87077.7	62473.1	68983.4	85895.1	78844.4	131030	96593	76062.2	62522.4
POS	M124T283	124.045	282.76	10332.4	9818.29	10836.9	11321	12034.7	13437.8	9739.89	11145.6	9179.4	9187.73	10249.3	10895	13930.7	9708.18	8619.53	10697.5	9785.8	9927.54	10887	9231.89	10771.7	9310.01	11134.4	9168.85	10990.6	9218.17	11657.9	10031.1	10980.1	9404	10433.9	10744.2	11926.8	8585.39	9550.6	10519.3	10088	10109.2	10475	9594.97	13870.1	9536.68	10314.4	9743.48	10300	10918.4
POS	M124T314_2	124.085	313.762	2.82918e+06	1.68558e+06	1.70669e+06	2.97422e+06	2.20836e+06	1.66535e+06	2.53716e+06	1.96656e+06	1.7117e+06	1.80081e+06	2.48702e+06	3.35056e+06	2.66462e+06	2.8794e+06	2.44272e+06	3.38899e+06	1.76945e+06	2.36663e+06	2.50275e+06	2.56642e+06	2.81831e+06	2.30349e+06	2.95675e+06	2.57394e+06	2.84496e+06	1.43526e+06	3.17511e+06	2.75985e+06	3.12991e+06	2.79613e+06	2.3938e+06	2.14949e+06	2.90814e+06	2.51948e+06	2.90275e+06	2.98066e+06	2.49359e+06	2.76718e+06	2.86803e+06	3.18268e+06	3.52658e+06	2.11345e+06	2.8424e+06	2.50167e+06	2.58665e+06	3.08009e+06
POS	M124T343	124.085	342.507	72450.3	52181.6	61645.4	154507	54109.9	57895.6	57081.3	56811.9	61315.3	44776	72911.9	73050.5	56403.8	51992.1	126113	83766.2	62055.2	126636	121394	71901.5	81049.8	95789.5	82332.3	83839.2	85522.8	55069	147738	138943	73719.4	173185	70537.7	70290.6	63657	70436.6	58751.3	62235	72995.9	77060.2	67548.8	84196	139131	59792.3	87379.1	82998.4	161558	50081.9
POS	M124T364	124.085	363.637	105910	218538	115349	127362	119019	117777	101571	64080.4	74113.1	107114	250067	112553	335755	273374	96297.2	94573	107861	88704.4	67909.1	94763.4	106759	86174.5	92177.2	109816	155821	105190	101365	94090.9	82749.9	114638	127839	115841	108150	300747	272032	84761.4	293869	92294.5	82533	107601	105483	101109	120559	120213	94274.9	101179
POS	M124T26_1	124.089	25.566	6877.93	7656.62	10020.6	8500.83	7919.83	6943.96	8112.81	8252.66	9674.83	7502.38	10335.8	8077.25	7945.3	12918.6	12985	10677.3	9510.74	9379.61	5832.26	8337.56	9003.02	8284.14	9987.42	8611.32	6372.23	6448.46	7124.46	5957.65	9227.07	9391.74	7067.32	7108.89	9508.41	8492.36	8526.28	10967.3	13971.9	8635.77	11481.5	7614.22	9910.35	6812.56	9255.92	8604.62	8524.8	13496.3
POS	M124T26_2	124.126	25.867	1045.11	991.724	1164.69	828.108	1252.83	986.428	1051.6	955.132	1406.69	827.704	1408.1	1141.95	1162.17	9383.15	8752.97	1219.59	1267.5	6037.14	1168.42	1237.96	1258.65	1079.57	1329.42	594.596	6572.49	796.864	982.737	6077.88	1054.51	1185.04	1453.61	980.755	1296.99	1141.57	967.59	1475.78	949.588	1193.15	1369.56	1067.88	1031.62	861.189	1267.58	1010.36	973.917	1048.37
POS	M125T29	124.978	29.1015	707.782	2335.87	714.841	522.871	113.693	531.033	414.872	516.056	451.959	631.076	406.673	647.734	469.691	311.948	119.514	124.052	194.31	236.129	217.007	171.992	296.174	162.366	308.803	348.14	229.637	578.798	532.03	125.504	230.337	127.484	107.019	578.725	4098.84	779.822	757.577	140.233	474.743	365.468	257.452	274.822	353.949	334.06	168.846	412.207	487.482	852.726
POS	M125T370	124.997	369.763	1163.42	1431.13	2698.13	1296.63	1483.73	2865.44	2496.38	1817.65	2753.57	1712.17	3799.54	3678.17	4394.27	4479.35	5148.03	7006.94	4480.52	4018.61	5995.67	3415.55	3770.96	3126.49	5491.14	3175.12	3007.04	3255.27	3223.79	2973.05	4883.98	3709.04	2844.38	3385.88	1897.44	3157.45	4489.57	5273.88	3187.52	4482.9	3764.19	2212.02	4405.8	3423.6	3851.15	4025.36	4200.49	3555.49
POS	M125T490	124.997	489.805	3933.15	2974.09	3014.05	2499.71	5081.46	8816.66	3782.76	3215.89	2449.79	7105.6	6311.88	5563.39	8911.52	5064.41	5109.78	4586.46	7635.27	6457.54	7083.94	4279.2	3468.05	3530.46	3625.85	5244.3	4106.31	9040.1	2365	4680.81	4176.04	5578.94	4049.2	8215.58	2539.78	2163.02	5726.64	4360.89	12620.5	4539.53	5756.52	5942.7	3440.71	6780.93	6386.52	3437.56	6485.82	3093.91
POS	M125T346	125.018	346.235	1590.35	2752.37	1393.26	2561.35	2744.79	4389.59	2285.15	3316.3	2458.63	2873.08	2563.69	3323.02	5138	4334.32	1732.81	2638.21	3019.18	3126.3	2884.57	2543.51	1743.33	1902.82	1357.03	2458.17	1369.36	3704.69	1779.68	3057.83	2498.43	2172.09	2328.71	3240.74	2675.76	2375.17	2559.02	3664.2	2278.65	2917.68	2123.9	2594.91	4231.82	3808.48	2949.29	2810.64	824.46	2375.02
POS	M125T25	125.084	25.132	1343.95	12948.8	4797.36	1495.05	5626.6	898.481	4055.58	4364.66	1560.2	4677.53	4993.49	1607.89	2512.15	5742.31	5698.66	4664.45	4305.62	4905.99	3969.15	1555.13	4799.03	3165.17	5991.34	4503.41	4244.78	3681.22	3373.85	4278.08	4091.85	1276.03	4646.02	3548.71	3990.45	1383.91	4153.33	4767.72	4241.48	4395.89	1719.92	4431.16	4582.19	3533.64	5897.36	4179.63	4209.97	3326.83
POS	M125T314	125.088	313.807	148862	82146.6	120181	158663	111950	96244.2	135965	111875	101386	111198	150267	169818	162079	144048	135725	178671	112894	123604	131649	140535	147814	122593	152936	132189	130574	97862.6	166620	148416	148947	152371	127804	111593	156039	132587	156512	148579	125354	148796	150574	165800	181110	134945	150902	153964	131849	145454
POS	M125T693	125.094	693.389	174.735	2771.97	3260.83	2766.54	2499.89	2648.83	215.658	123.004	287.992	159.862	2424.22	2659.39	2864.36	3204.45	2758.51	3103.7	2688.89	2903.79	2887.75	2611.87	139.745	2726.93	3550.05	2825.9	172.152	2494.28	2576.82	193.25	2698.85	2892.36	2771.56	2591.48	301.514	2885.82	2716.16	3298.63	175.493	2557.68	3239.22	2564.49	2840.04	184.586	3000.75	2809.19	3138.45	384.356
POS	M125T73	125.105	72.803	90422.6	25841.5	49241.1	76290.7	56988.6	72355.2	81681.9	82217.6	70085.5	26500.4	36082	61705.3	117311	65389.6	85145.9	85404.7	66160.2	105904	83169.1	24601.4	64142	19589.1	111052	59001.6	56734.3	58867.3	41166	54101.4	81175.3	76008.5	39467.5	51420.1	74262.8	64992.2	80388.7	137963	142932	141716	62749.8	56993.6	78916.2	28107.4	102203	65255.8	66967.7	77012
POS	M125T34	125.105	34.068	32277	12386.3	26702.7	17931.9	7200.47	11671.3	14260.3	19091.5	12457.8	10451.5	8445.04	12480.7	14033.6	12334.9	13193.7	13251.8	12697.1	12685.2	5762.48	12601	8086.34	9290.84	9634.13	9095.61	10645.4	6169.42	10784.8	630.134	11716.9	12631.8	12235	7182.1	10658.8	16608.4	17876.1	13584	20587.8	14079.8	14042.4	7604.5	16670.1	10350.7	12334.8	6485.55	18337.7	13277.6
POS	M125T26	125.121	26.055	894.845	6295.68	1176.34	1061.91	1032.84	907.327	1980.26	1257.29	3326.52	1944.26	2381.94	1009.46	2044.17	1479.61	1281.06	958.727	1290.13	860.472	837.014	1076.21	1213.23	1197.25	1235.83	822.626	1123.95	1049.24	2347.33	1133.27	960.25	1056.68	609.492	461.982	1084.96	884.146	956.666	1077.78	1109.55	956.715	1184.41	3013.4	1295.17	922.419	1103.31	1043.67	844.305	1047.42
POS	M125T45	125.13	45.234	4115	17002.7	4634.17	5323.97	6506.52	11529.8	7150.94	3270.44	8474.95	7128.96	5922.79	13796.7	8070.14	3512.86	6243.83	7478.94	7677.55	5813.22	4137.31	7730.22	3820.1	3690.12	19189.9	6499.34	7209.62	4579.19	10094.6	4338.31	3854.52	5314.57	5963.47	8293.99	14851.8	3224.26	4624.42	6179.73	4865.79	2787.41	3402.29	4810.03	2394.54	6478.43	6311.54	5491.52	6386.46	24476.9
POS	M126T281_1	125.641	281.469	475.96	1159.35	908.166	1014.22	956.036	805.956	769.616	1217.9	695.131	713.725	1414.74	977.282	1797.38	2092.55	1836.68	1909.83	1372.38	1519.58	916.195	1720.31	1838.91	1516.87	2404.74	1613.61	1605.33	1396	1740.49	1701.61	2219.07	1771.96	1340.5	1211.3	832.5	1474.47	2022.99	2131.93	2067.29	1309.47	1672.38	1169.92	2017.45	1568.9	2020.73	1431.62	1413.69	1392.49
POS	M126T281_2	126.021	281.419	247323	468757	295475	368683	480027	349240	312235	416480	376749	343470	664415	582464	836935	977960	768622	806553	813904	591701	597735	696409	673712	588264	958440	639750	632788	718140	677374	711643	949289	753751	559687	574592	274361	788547	834319	866850	875457	744442	617763	624336	657579	625743	850015	638871	704500	564216
POS	M126T343	126.019	343.036	3539.87	4995.87	15066.5	2538.42	9207.78	8515.61	5763.71	13951.3	16431.1	2303	13699	9268.12	9166.4	3082.13	27259.9	14461.7	21711.5	12650.1	12014.2	17631.3	11662	7706.68	14594.2	19527.4	8647.47	10818.7	14090.6	13861.6	16733.5	16125.8	16151.8	16197.6	4002.2	6172.67	7272.86	14745.3	8311.95	11710.1	13083.1	8633.73	9885	10246.7	16727.1	18227.9	12592.5	3918.42
POS	M126T39	126.019	38.796	1414.73	461.364	965.292	1542.7	1342.42	2148.01	1324.6	1083.85	991.676	2037.82	1267.91	1741.61	2398.27	1853.51	1266.8	1554.01	1844.96	1578.65	443.931	1336.69	1872.06	777.145	1806.59	981.296	850.541	1261.42	1046.2	926.44	1429.4	1658.96	303.297	2764.58	1059.87	1673.3	1425.13	1656.12	1988.06	1642.43	1111.33	1060.98	1152.4	1209.5	1724.25	1938.06	1647	1522.02
POS	M126T286	126.05	286.215	5536.52	3243.02	8162.81	3446.02	6439.88	9189.85	6600.22	9776.45	7771.16	305365	7256.69	6338.11	7992.46	901757	7777.5	5630.23	5020.68	4926.03	6522.54	6866.18	4959.6	3891.19	7168.42	5527.52	7203.73	7601.11	7415.13	8904.94	6163.32	5049.84	8270.88	5795.62	241302	3195.62	6042.2	5391.69	3280.16	4265.74	7529.61	6648.89	6876.93	6009.63	6794.77	9335.24	6142.68	3106.84
POS	M126T379	126.053	379.134	4133.75	6478.02	5461.72	20822	22290.6	5299.31	6124.05	11236.8	9764.84	4235.52	5016.89	7036.8	5286.35	15103.9	5981.14	12485.3	7156.83	6743.39	7898.33	5999.65	11873.9	3593.82	6437.77	8936.84	6143.43	4111.53	5583.23	10307.1	6624.19	4549.99	7541.28	5613.44	6913.56	4722.98	4685.16	5707.72	6186.91	6496.91	6769.66	4361.28	5923.08	7923.19	7137.73	5423.71	7252.54	3632.58
POS	M126T242	126.064	242.386	7127.09	6003.24	7406.6	8842.25	7788.06	13555.5	8417.95	10646.2	8868.51	8407.74	9506.93	8711.06	7274.49	9646.56	7263.98	7042.23	11731.9	7640.22	11333.1	10016.1	5463.15	6578.39	7006.88	10563.9	13687.3	6600.54	6740.85	8502.06	6330.69	13468.2	7058.91	8162.58	6371.95	10352.9	7201.52	5853.24	9853.14	9106.31	8007.44	8996.76	7743.43	7483.43	6781.65	7402.4	9342.42	4721.37
POS	M126T76	126.089	76.009	268241	87405.1	137961	230062	177224	109075	107174	238235	246585	101219	117110	172984	177823	208640	272277	270500	191327	337455	254346	32248.4	220040	21903	234236	191200	167335	181737	133959	91028.8	259178	228338	126880	159994	232185	227492	253665	449383	410938	458470	197452	126738	256910	69521.8	330178	213009	202526	225978
POS	M126T48	126.089	47.6345	6618.12	1497.78	7783.72	9821.64	9346.3	6067.06	10274.6	8313.36	9163.78	5249.41	7670.98	5928.49	5327.24	10094.7	6858.45	5529.11	6998.18	11757.9	9765.95	7556.92	4358.85	4574.18	4386.74	6775.38	4530.56	6023.44	6809.12	5600.55	11663.1	6716.66	10366.6	4572.46	4086.67	8206.39	5977.37	7014.39	8675.71	5029.26	5009.81	6196.93	8324.63	5233.68	9963.3	7102.41	7230.1	12844.1
POS	M126T314	126.09	314.477	5844.25	5026.3	6040.29	7603.69	7061.02	7932.93	5602.22	7133.96	5368.35	4652.7	5774.85	7098.43	7092.67	6042.89	8174.78	6025.05	5342.77	5796.77	5516.74	4243.6	5211.73	5014.03	6177.15	5917.97	5016.2	4401.54	6112.8	5676.73	6275.24	6337.67	6105.36	5659.08	6493.34	5869.36	4719.18	6701.31	5046.32	4395.24	7425.48	5995.02	9610.28	5977.91	6067.49	4630.28	4204.54	5884.32
POS	M126T147	126.1	146.943	399674	2524.86	317963	156699	26659.8	319279	149748	135134	176128	49958.7	2790.92	41554.1	112250	52945.9	14156.2	24863.8	15819.6	29907.8	4558.87	2794.84	3159.29	2533.85	5419.29	10997.9	11058.3	3482.71	757.487	1957.23	6718.08	4040.96	3573.07	29699.4	652.569	158022	138243	26404.9	108883	3479.26	27765.2	2649.45	4164.43	109222	160735	16024	192352	8100.73
POS	M126T360	126.1	360.17	12198.2	8032.5	13199.3	42170	32140.4	7717.73	10366.4	7068.75	25030.2	6195.17	10870.6	7582.06	18105.3	22558.3	4864.62	23133.7	9955.05	4512.05	5279.4	7394.16	22420.2	28924.3	9774.04	14130.7	9569.47	6399.7	4761.53	15327.4	10492.7	27047.7	10850.5	5562.65	11232.2	5519.4	4698.9	4768.39	8469.58	7820.71	11156.5	11752.7	4956.86	8933.38	5991.94	14567.9	10876.8	3050.37
POS	M126T25	126.105	25.209	2281.74	1105.39	2165.51	1957.54	2747.16	2287.9	2100.47	2276.73	1448.71	2300.26	2278.06	1152.63	3101.13	3788.06	1780.67	1470.19	1042.67	2378.48	2301.3	1338.14	2556.72	1327.73	3005.72	3088.56	1412.69	1914.49	1191.28	1350.01	1450.44	2768.97	1830.54	1108.82	2842.81	1277.19	1374.81	2796.33	3786.7	1415.69	1557.43	1209.62	1237.62	1198.75	2324.74	2556.16	1322.11	5344.02
POS	M126T73	126.108	73.051	249852	80280.9	128649	200859	1644.02	5286.76	254017	236023	212920	1201.84	92194.5	4114.73	345705	181840	246863	275259	172765	292380	5875.47	69073.9	203169	37302.5	215688	189227	2673.76	141209	118246	175439	2098.39	200822	111607	181043	4667.08	198886	4174.43	2140.39	305435	3542.25	5481.8	2020.75	2097.83	66865.1	273583	3378.49	2093.5	234214
POS	M126T44	126.125	43.655	3552.08	6919.37	3040.2	13134.9	3170.75	4828.91	3234.3	15638	18043.9	2564.68	11007.3	9330.76	10329.2	18275.6	13736	11314.1	13184.7	2458.64	12196.6	13382.6	8861.74	9000.11	9726.77	12758.4	10360.8	10860.1	10413	11885	14711.7	12512.3	13507.9	8513.82	9505.55	2640.81	2892.58	3562.46	13942.2	10235.2	3164.35	15543.6	10535.9	3139.53	4402.97	12601.4	3772.02	16370.1
POS	M127T281	127.022	281.409	5826.16	10031.1	6644.82	18702.8	10595	16088.4	7298.05	9365.77	8514.64	8081.67	14273.9	21192	17780.1	19997.8	15399.1	17867.2	16689.4	12432.8	13417.3	14774.9	13370	12281.5	19588.6	13827.2	14904.1	14855.1	15945.8	14268	19048.9	14673	13043.7	11859.4	6339.01	16110.1	18083.5	16421.3	17419.8	16074.7	13681	12714.2	14699.6	14850.9	17705.1	13578.4	14479.6	12134.2
POS	M127T311	127.03	311.394	3760.53	3202.07	4109.75	2326.6	6997.46	10741.3	6151.64	7095.48	3312.46	7236.77	11401.6	12624.2	17482.7	5410.46	6440.35	21478.5	10378.7	4870.12	14588.7	4769.06	4153.91	4390.52	7059.33	8453.13	7523.74	9158.59	4375.96	25140.5	4720.57	9263.71	8612.16	11560	12449.1	2790.38	6308.42	17019.9	7592.61	3296.89	16024.7	7133.56	7344.1	5121.76	8089.9	7397.3	6506.52	7093.14
POS	M127T36	127.036	35.959	3000.53	3056.41	4182.58	4556.05	4213.24	3342.92	2593.51	2348.41	3951.55	3076.81	1928.8	3383.3	2942.73	3060.67	1434.26	1694.39	1787.39	1214.04	1026.47	692.145	835.928	788.568	1072.74	680.995	1558.81	349.682	737.538	935.774	1232.72	791.828	1837.49	4491.19	1672.17	1883.1	1768.07	1860.26	3751.04	1040.45	598.92	2075.6	13678.5	1002.23	729.58	1185.44	724.814	1800.4
POS	M127T254	127.049	253.854	282405	118846	227970	205349	122162	141127	198807	276477	226573	251744	272929	231991	93724.8	90602.5	241783	167496	253243	177922	175305	263731	222167	345331	347522	223501	255255	202361	218583	204228	247406	250017	297539	232517	247419	287463	294850	153059	229418	229943	297010	247061	221896	141890	188049	244891	227489	223279
POS	M127T361	127.048	360.934	21044.3	22029.1	18591.5	17399	14524.1	13155.2	19624.5	21921.4	18937.5	19611.6	19927.9	16443.8	11459.4	12729.6	4073.18	13536.9	2678.31	15306.2	1011.94	19221.5	18913.1	24548	21472.4	17343.2	18048.5	17566.3	16036.8	16239.5	19221	15743.8	20350.3	15431.5	21155.4	23172	20307.3	13559.1	14803	17594.8	19672.2	15805.4	2936.31	2216.76	15584.7	17057.7	17921	17953.4
POS	M127T296	127.047	295.889	26116.1	6111.67	30460.3	10432.6	3321.64	14058.4	27418.8	41826	29737.1	23353.3	21199.7	14516.2	24768.5	24036.9	20991.2	7360.42	24038.6	27061.4	3081.88	23838.4	5586.32	25345.2	22670	22573.5	22837.8	18432.7	19928.6	7586.98	22193.6	5122.68	22881.9	9932.93	29451.8	27833.1	45003.2	19358.2	26608.4	22586.7	23158.3	19016.5	20491.6	20787	23191.1	13031.2	5213.01	23323.2
POS	M127T316	127.048	315.681	33752.7	63635.8	72272.1	67395.4	73375.6	51660.7	77386.1	70133.6	43554.8	66731.7	75628.6	65167	73609	64094	36625.3	63111.4	60268.5	65746.4	66984.3	64005.2	74718.2	56426.9	87467.1	32005.4	70410.2	25776.8	57063.6	68538.7	60567.3	65795.3	69942.3	47623.8	33917.5	81528.9	72857.9	69867.8	49787.1	54363.7	62172.1	31264.6	30334.1	62738.1	55052	29678.6	59107.2	70333.7
POS	M127T198	127.037	198.495	2136.96	989.011	3247.5	1246.57	3868.21	3977.12	1868.28	3478.76	1300	826.522	988.285	1187.12	2759.83	1516.51	3018.26	1355.43	908.087	1359.93	962.769	1152.84	935.277	962.687	1082.04	1361.76	1151.54	741.297	1445.1	1623	1305.29	1690.41	968.572	980.2	1105.91	814.794	2583.39	1313.78	1215.56	1274.88	835.3	1008.17	1495.44	1499.52	1264.82	1525.01	1464.47	1314.66
POS	M127T390	127.048	389.504	14905.1	11420	13492.7	13532.1	11266.1	10379.7	14781.5	14942.7	14341.5	13057.5	14533	11991.4	10874.5	13817.6	13437.9	11675.3	12259.1	12195.5	11136.7	13948.5	13469.3	13308.7	14634	13688.9	14330.6	10648.5	13160.1	13746.8	17192.5	15336.2	13856	9717.38	15675	14537.6	14496.3	13097.8	9335.36	14339	18123.6	12045.7	13805.2	10312.8	14524.1	14830.4	13410.7	13675.7
POS	M127T139	127.048	139.323	10112.1	5335.34	8434.98	12659.9	13499.9	10655.4	9887.42	10582.2	8415.14	10696.7	8131.6	12837.5	12496.1	16241.6	8411.83	8111.6	9433.07	8679.75	10785.6	8468.97	9355.71	8075.77	7398.31	13916.8	10441.3	9586.89	8908.33	9985.43	9931.58	9961.62	8449.34	11748.7	9007.85	10123.2	8948.88	10659.9	10628.5	9051.11	11644.5	10517.7	12687.4	8975.89	7975.15	15515.1	11025.1	9459.42
POS	M127T270	127.084	270.423	2306.3	16012.5	4135.1	2546.72	4199.42	1177.88	3139.37	5872.21	2223.94	1229.1	1609.13	2798.64	1820.32	2095.01	2052.2	1926.14	1171.38	2807.99	1302.41	1761.62	1833.72	1403.55	1604.67	4076.1	1201.97	1497.53	1290.87	1745.79	1518.77	1375.6	2372.35	2481.69	807.317	2976.05	3498.42	1918.25	1975.18	1923.66	2157.04	1483.12	2094.96	1704.66	3063.31	3465.69	2768.6	3275.03
POS	M127T289	127.084	289.031	10535.9	30666.8	13870.2	9550.19	3247.21	7030.1	7990.77	6497.7	4347.04	5670.77	1760.39	4522.13	4770.42	3739.31	3090.26	3606.65	12242.2	3349.37	1348.65	1543.83	1377.9	3618.05	1891.11	1079.9	3456.5	2059.95	2621.74	1723.49	2526.61	993.133	456.148	6297.94	21740.9	3483.81	8273.79	6927.67	5964.33	2274.74	3249.48	2172.92	2403.58	3334.87	9924.72	2109.21	5976.99	3608.23
POS	M127T73	127.092	72.901	30796	7162.19	9577.39	17709.7	12966.5	15213.8	19088.1	20197.5	16329.3	6066.12	9333.49	11672.6	27302.8	13003	22641.5	26160.6	14405.2	22923.8	16693.4	6716.72	15604.3	1781.77	24977.2	13303.5	12821.9	19487.1	8579.76	10535.2	19775.3	15524.4	10075.1	12679.1	16973.5	16827.5	17853.4	32179.7	31346.9	33490	13723.4	8191.37	20077.5	4009.31	25260.2	15070.4	16204.4	15995.6
POS	M127T208	127.096	208.363	50823.4	153534	71632.5	55932.8	58488.1	30835.1	39474.2	78479.9	68289.3	41574.6	51380.1	48762.2	51362.5	65667.1	69079.3	60901.7	55778.3	45060.3	28996.4	56228.9	44628.9	53393.3	60907.6	41292.7	71934.5	40041.7	55902.2	46760	68145.8	52301	53464	39725	144504	50422	75262.7	54130.9	34570.3	68013.4	54950.2	43552.7	71497.7	46006.4	56823.4	50241.6	55099.8	75885.3
POS	M127T501	127.095	500.847	19699.2	37105.6	25219.1	21010.6	15398	21290.2	17982.1	23991.7	19687.5	17818.9	27787	24173.8	33268.6	41883.3	29571	40026.7	18675.6	21775.6	18453.1	22523.1	21250.7	23454.3	26985.8	24181.2	25647.7	15828.2	27232.3	26172.8	26955.6	19355.6	20932.5	25757.4	46856.2	21429.7	30898.2	33990.5	21040.2	29740.9	28718.6	18280.9	25505.7	23737.2	34055.7	32460.2	25303.5	29345.1
POS	M127T25	127.101	25.029	656.564	4513.9	1213.41	601.287	1410.98	1889	1094.7	518.87	977.383	1258.12	1974.36	577.657	442.933	1264.44	1326.33	1141.02	620.121	1336.63	1296.1	1448.99	1298.8	574.148	1581.82	1607.65	1308.7	1136.81	703.798	592.433	426.756	1285.62	563.722	449.021	1720.13	1889.34	1466.68	1696.4	1292.29	1083.61	1416.65	1242.52	901.763	990.471	771.779	682.027	563.216	1041.2
POS	M127T147	127.103	146.905	24613	1216.14	18577	10166.2	1828.11	19932.4	9359.2	8522.62	10450.4	3110.06	5071.14	2367.62	7137.09	3140.59	785.898	2248.23	856.306	1731.3	1420.55	1342.73	1538.21	1480.03	377.803	1540.24	1581	465.458	1738.54	1253.8	1459.98	1454.54	1299.24	2610.8	1126.42	10606.4	9196.33	1643.99	6449.44	1345.75	1528.08	1622.15	1445.34	6758.95	10767.9	1789.67	12199.8	1189.56
POS	M127T231	127.121	230.845	3463.51	3053.5	4502.49	5723.6	7440.54	3404.37	3984.62	2864.7	2890.52	4363.35	4245.52	5084.13	4253.71	2040.96	5702.77	5174.81	4984.09	4745.79	3762.64	3734.83	4247.14	4597.88	2277.88	4050.48	2359.72	4050.38	5110.87	3757.52	4967.76	4656.35	3604.58	4034.83	17778.3	3993.72	2486.69	3853.38	3784.46	5484.79	4010.96	4258.62	2830.14	5906.42	2482.34	3164.7	4908.57	6642.22
POS	M127T166	127.12	165.975	45252.8	914.988	13902	26173.9	37411.3	1933.31	15862.9	9799.56	2055.43	575.764	272.061	890.354	710.734	2265.45	586.502	918.202	853.594	566.627	510.822	694.543	323.203	446.298	804.482	309.604	1021.92	770.904	279.389	503.096	454.049	742.392	507.341	912.903	482.434	1044.88	1368.39	1708.61	5450.26	578.398	478.545	707.981	840.841	434.286	525.464	379.615	651.925	868.337
POS	M128T351	127.967	351.36	1859.46	2197.66	1820.13	936.769	1175.52	2212.43	1870.07	1700.98	1141.44	1121.43	1805.56	2150.58	2177.97	2049.56	2288.34	1591.95	1777.7	1505.91	2180.77	1645.2	1067.01	1586.26	1403.1	2028.09	1617.96	1927.44	1922.78	1035	1321.8	2099.5	1593.32	1865.4	1078.35	1752.32	1501.71	1395.93	1919.67	1756	1535.66	530.176	1745.16	1742.09	991.064	1280.68	1768.83	1741.47
POS	M128T281	128.015	281.419	11336.2	20052.4	13356.8	16049.7	19783.7	15292.8	14419.7	18828.8	16376.2	15757.8	27586.8	23861.4	34505.9	37530.5	29603.4	30869.1	32276.8	23017.3	25881.1	28151.2	27701.5	25147.7	37100.1	28645.5	27949.8	25805.4	29100.8	27104.9	35077.9	27435.4	24984.8	24082	11824.8	30442.7	33772.7	30717.6	35440.7	30194.4	24598.5	27569.7	26581.5	25249.3	35475.5	25785.9	27738.6	23563.9
POS	M128T311	128.033	311.112	640.158	583.516	749.194	586.773	557.63	641.521	508.244	422.1	644.346	531.568	728.108	1056.51	980.865	608.77	855.864	1141.41	665.224	468.051	1133.55	704.248	729.64	542.41	739.417	712.148	610.876	710.451	907.135	1731.83	622.216	669.352	533.361	740.36	1211.74	588.563	857.087	1100.71	979.917	655.013	1161.95	1013.15	672.259	746.761	468.105	444.368	639.491	668.25
POS	M128T44	128.047	43.658	6292.74	2078.15	6616.31	4400.12	3613.22	4678.22	8221.42	5384.49	5504.08	4615.49	3578.01	3733.2	4511.73	3352.09	4097.8	3164.21	4592.6	4765.71	4970.06	4065.97	3211.91	3992.1	403425	5002.72	2180.23	4991.76	2393.82	3361.07	4338.91	3357.29	4084.2	3145.34	1858.38	5956.45	5516.01	4633.65	4136.26	5067.68	4192.02	3295.13	6270.93	5657.33	5774.41	5445.73	3687.59	6447.95
POS	M128T254	128.051	253.797	11893.7	6093.25	9737.53	9426.42	5969.99	5412.23	9048.33	12480.9	8174.72	11014.5	15266.7	10613.8	5551.25	4178.56	10966.7	7408.94	11285.5	8184.18	8388.01	14557.3	12180.2	15666.5	15477.5	10721.8	13775.3	10960.1	10045.5	9360.22	11304.5	11815.5	13053.9	10024	12057.7	12037	13988.3	7283.35	9322.52	10757.9	14132.4	11582.6	9694.85	6671.51	8555.5	10826.2	10827.7	10415.6
POS	M128T451	128.068	451.036	23177.9	27250	33851	22417.9	42502.8	67716.8	22589	38664.5	28055.4	15525.3	22604	32477	37957.4	22449.5	39827.1	49129.5	29059.2	47826.6	23410.3	25697.5	22001.8	18732.1	27621.2	23097.2	27173.5	20830.6	17714.7	48629.6	23961.3	23055.5	23855.9	29148.3	22971.6	21309.6	22476.3	24391.6	16597.4	22266.6	23858.3	24608.4	27325.4	27562	33398.3	28459.3	30034.2	16526.9
POS	M128T210	128.068	209.543	68546.1	15841.5	219922	33426.6	81504.7	67471.6	123612	71275.4	164510	44425.4	39698.3	56800.4	75029.4	27082.7	40355.8	52930.5	86779.2	71321.5	40122	23211.1	14808.3	24305.3	14406.8	49034.6	40308.5	37540.2	64241.6	17706.8	14774.5	14816.4	29044.5	45823.4	12947.6	35685.7	33841.8	61741.3	31507.9	26289.1	37927.2	23335.5	18162.2	36955.3	36418	33870.5	35748.6	21585
POS	M128T190	128.068	189.793	16062.2	13112	27341.6	21946.6	5769.63	21759.1	15770.2	10763	15501.8	17716.8	21362	21601.8	28046	38094.4	10936.8	22923.8	16038	8700.17	16659.3	14825.8	16238	15421.6	25689.7	34389.3	19690	18236.2	5356.96	12318.4	29851.8	4613.28	5117.96	21284.5	33493.4	24024.9	29032.1	25408.5	16297.5	28892.1	15316.5	15919.9	44871	26171.2	26169.7	34264.5	23872.1	38742.6
POS	M128T507	128.068	507.141	22676.1	34528.8	41749.2	36940.3	23972	36147.2	26861.1	28148.5	35697.7	35201.6	34252.8	26060.9	50704.8	48481.9	30606.6	37748.2	56660.9	34752.5	42302.4	26861.1	38850.9	34841.3	22363.4	33204.8	32778	42214.1	39746.1	30149.8	50554.9	27536.5	33985.9	49982.8	43079.8	29831.8	35257.3	42770.4	34438.5	32343.4	46468.6	26102.4	34494.5	47765.8	50698.7	38961.9	42594	33086.9
POS	M128T310	128.068	309.764	14571.7	15643.9	14807.5	18287.9	27632.5	27136.8	15934.7	18884.3	20327.5	17802.9	18036.3	23724.8	32831.6	23070.1	12335.8	18634.3	16418.4	16344.5	16968.1	18338.6	13721.7	17069	14201	63571.7	15489	17008	18031.2	15605.2	18242.8	13234	17490.9	22619.6	19591.7	20490.3	14769.2	15306.4	15082.1	17416.4	14294.4	56046.2	17465.2	21401.1	14610.2	25167.8	14755.2	24505.3
POS	M128T255	128.068	255.341	22373.7	6617.79	25736.3	13076.4	11581.5	23204.5	15493	17157.4	29327.5	11080.7	14408.6	11400.3	12673.6	6699.85	12898.6	10160	15251.3	13673.5	9677.88	14178	12817.3	17898	16555.4	15332.6	15398.1	11621.3	14534.7	9941.65	10706.4	13857.2	13361	12772.4	12889.1	15457.1	15307.8	11743	9997.27	12809.4	10777.2	12586.1	12253	12295.4	15081.5	11673	10332.7	11185
POS	M128T25_1	128.076	25.21	919.201	8514.04	2501.62	1054.01	3706.46	1479.4	2914.45	3567.44	2669.76	1793.25	2335.78	2951.41	1205.18	2788.96	2813.64	2959.15	3030.97	3343.99	4336.17	3282.74	2009.85	2046.37	2725.56	2383.08	2387.2	2299.33	4180.65	2720.67	1618.52	3667.52	2943.92	3125	3293.31	3361.3	2572.56	1040.93	1195.95	2727.95	4264.04	924.435	1921.69	2957.95	3732.77	2300.96	2371.91	2637.03
POS	M128T208	128.099	208.136	47900	9000.35	2493.53	1886.26	1718.77	1109.61	1013.86	3930.45	2256.12	1580.85	2594.6	1586.17	1854.12	3404.48	3039.89	1635.17	2365.59	53567.3	36632.1	2321.3	1183.63	2969.67	2264.91	1526.94	2488.71	1264.13	1539.86	1614.12	2162.12	1170.07	26099	44128.9	8226.87	2961.38	2852.21	1744.34	27117	3009.97	2134.89	1486.18	3179.6	1599.84	1786.05	1903.03	2327.91	3117.18
POS	M128T296	128.104	296.407	5465.11	3131.65	14615.6	4635.02	9478.79	10942.7	5550.79	10342.1	7516.6	9568.46	7234.15	7022.83	14311.4	3557	6893.7	5742.96	5477.36	6205.94	7526.64	4454.37	5244.02	3020	4544.14	5460.09	9557.15	5275.05	5233.89	7208.26	4889.67	5379.45	7332.93	6315.81	6795.81	7905.56	4684.89	6437.43	4676.6	7024.67	6274.72	5307.49	8650.46	8061.16	8272.42	13585.2	7335.33	7131.2
POS	M128T48_1	128.104	47.8065	16044.4	10862.5	20388.1	16715.9	23779.2	15251.3	18328.1	23763.7	10550.1	11292.2	11813.1	13884.4	12093.4	16374.6	16046.9	12718.9	18043.7	16960	12888.9	10908.2	10533.2	14989.1	9402.59	23180.7	10315.7	11951.4	7807.47	19922.5	14052.8	13843	11828.3	11808.7	13967.8	16488.2	14280.7	13732.1	18985.7	16512.1	12371.8	14991.7	14173.1	12205.1	17191.2	13952.4	23305.8	22880.5
POS	M128T25_2	128.121	25.1735	2205.96	2505.84	3750.23	2646.23	2393.94	2436.82	3047.25	2379.24	3284.98	2572.2	2515.33	2308.59	2172.03	2947.89	2775.6	3502.02	2397.27	2659.26	3812.12	2965.12	2614.34	2046.03	2786.53	2002.28	3639.96	2474.26	2174.37	3510.72	2382.94	2589.29	2715	2162.82	2284.59	2306.08	2463.42	2615.06	3173.54	2346.7	3932.94	2454.67	2388.09	2001.27	2344.77	2593.23	2228.17	2345.41
POS	M128T48_2	128.141	48.192	7101.9	15790.1	16019.6	8669.84	9571.53	9904.97	10865.6	10738.4	16867.4	5582.55	7697.37	8940.83	6180.36	21495.5	13886.1	14867	19089.8	11417.7	16717.6	14852.7	7531.29	18156.2	6094.23	7472.81	8590.31	5998.6	5853.46	7103.87	7657.17	23731.6	7330.2	15067	15744.7	11873.6	11368.1	13162.2	12382	9021.25	7205.77	10298	13856.2	15801.2	15502.9	7300.07	26174.2	23276.7
POS	M128T26	128.158	25.92	2203.54	2276.9	2908.44	2626.86	2387.42	1970.36	2190.66	2508.88	2642.49	2097.83	2441.44	2591.42	2316.14	2971.21	3367.7	2623.42	2340.99	2474.47	2283.95	2595.88	2413.12	2389.49	2333.75	2282.78	2743.75	2203.4	2204.34	2256.33	2209.04	2551.98	2667.9	2040.91	2823.23	2261.5	2439.69	2861.99	2226.65	2418.19	2508.95	2209.59	2443.33	1883.13	2876.92	2434.58	2703.99	2674.63
POS	M129T351	128.564	350.897	14869.9	15331.9	17519.4	15692.3	18428.2	15558.2	11010.8	17415	9777.62	14534	9244.52	17709.5	14693.7	20155	16119.4	11817	14459.4	16128.7	15681.4	15508.8	15820.6	13269.5	16114.9	15862.7	8196.46	16062.2	14907	9228.35	16604.9	18359.3	15623.5	17613.8	15525.4	18602.6	17698.9	19466.8	952.872	15888.5	18075	15248.2	15685.9	18874.3	16235.9	17955	16196.8	7809.78
POS	M129T327_1	128.676	327.324	6437.74	7174.35	7644.49	3221.5	1725.59	2314.6	4570.94	5696.01	5540.01	3642.91	5451.01	3122.64	3169.31	3633.1	5507.2	3551.65	4247.93	3300.58	3057.45	4134.12	4328.65	6029.53	5416.28	4064.42	4425.24	3385.74	3959.8	3243.64	4473.71	3788.8	6391.89	2810.43	8971.06	4566.93	4246.07	3051.16	2014.05	4635.61	5454.31	4107.87	3976.36	2830.07	3354.57	2831.36	5178.73	4107.4
POS	M129T342_1	128.676	342.444	2375.52	2335.57	2858.78	2563.89	2627.38	2282.71	2799.59	1970.77	3004.48	2580.85	3032.44	2765.04	1750.81	2113	3999.13	2602.63	1531.57	2553.57	1411.89	3310.33	2753.79	3712.45	3310.76	2075.03	2354.71	1457.9	3710.54	2939.76	1895.46	3022.18	2554.42	1871.31	3055.34	3632.12	4073.69	2286.2	343.49	3899.53	2369.92	2950.79	1868.51	2036	2621.17	3127.49	3028.41	3310.22
POS	M129T349	128.952	348.864	9.05135e+06	8.57444e+06	8.66959e+06	8.985e+06	9.50523e+06	9.20275e+06	9.30915e+06	9.33548e+06	8.56792e+06	8.52767e+06	9.2139e+06	9.15904e+06	6.94271e+06	6.76584e+06	9.31257e+06	9.4869e+06	9.23055e+06	9.32417e+06	8.68919e+06	9.12947e+06	9.16105e+06	8.17229e+06	8.75242e+06	9.23064e+06	8.98601e+06	7.95332e+06	9.17545e+06	9.00203e+06	8.71103e+06	8.67586e+06	8.97261e+06	9.04146e+06	8.85754e+06	8.90618e+06	9.32033e+06	9.52155e+06	9.10488e+06	9.12743e+06	9.33479e+06	8.99786e+06	9.70071e+06	9.08532e+06	9.09682e+06	9.27167e+06	9.36824e+06	9.43401e+06
POS	M129T389	128.951	389.278	89092.3	146567	85234	85888.4	105603	114691	134083	108249	165157	177950	213284	10276.8	173399	143269	111318	142568	81729	88249.7	96982.3	10411.2	112672	14421.3	9755.85	211996	134107	12360.3	94605.4	219855	116411	120525	77786.8	84186.6	162609	173964	91022.1	219114	77333.3	89837.8	114973	14302	142087	146857	104140	123391	203711	104989
POS	M129T281	129.019	281.44	715.207	460.161	365.969	455.844	464.321	818.712	602.043	512.327	322.602	311.728	587.506	616.115	972.49	1064.02	798.888	892.847	853.688	661.579	862.686	859.103	782.894	667.745	875.463	527.806	615.068	509.145	908.552	586.853	910.257	840.172	646.228	578.515	467.748	703.227	874.352	858.54	996.799	677.339	401.264	541.935	539.555	675.495	1101.59	555.069	677.563	541.651
POS	M129T44	129.034	43.73	2737.4	2238.43	2838.91	200.718	544.67	1475.68	1696.07	6905.73	606.571	318.926	925.015	627.26	718.715	388.79	533.93	851.68	181.913	146.565	1948.24	3608.44	7845.76	2358.58	18050.4	1682.17	1038.26	505.5	486.31	292.262	367.481	1983.9	986.746	1530.35	2936.06	398.214	623.497	5344.93	3734.24	2788.56	1733.49	482.231	1010	2707.46	521.421	1216.72	566.347	1491.29
POS	M129T53	129.052	52.964	45075	77151.7	68782.9	34764.3	55064.9	56513.5	56063	27656.6	76009.4	36294.8	12249.5	10757.3	4630.77	10123	12647	10208.4	9777.93	13541	10678.6	5599.46	13122.5	10369.7	16685.1	17871.2	12215.5	9163	11328.4	13062.6	13636	15088.1	12091.1	10349.3	8712.89	11021.7	13591.1	13541.6	10397.8	13769.8	8078.24	10851.7	13347.9	8573.36	9949.26	11193	11227.7	13588.2
POS	M129T278	129.045	278.068	2228.1	3138.39	731.974	1286.55	810.053	834.677	2218.33	1095.51	1112.16	475.807	429.742	320.943	214.8	504.215	288.014	249.526	250.046	387.465	251.626	429.884	401.022	378.169	210.785	232.398	340.931	198.757	301.504	163.584	333.22	257.825	446.403	408.257	248.723	361.486	704.712	514.968	336.167	200.153	214.12	313.066	3007.96	504.089	340.148	261.765	933.837	309.642
POS	M129T327_2	129.065	327.444	1.66204e+06	2.3841e+06	2.37129e+06	1.87672e+06	1.2637e+06	1.19208e+06	2.1303e+06	2.2969e+06	2.06135e+06	1.85891e+06	2.07144e+06	1.47095e+06	1.06283e+06	1.23783e+06	1.99999e+06	1.27189e+06	1.80443e+06	1.60111e+06	1.38176e+06	2.24691e+06	1.71555e+06	2.38225e+06	2.07024e+06	1.55789e+06	1.90425e+06	1.50669e+06	1.59703e+06	1.41752e+06	1.92786e+06	1.59941e+06	2.1698e+06	1.24031e+06	3.57227e+06	2.28386e+06	1.892e+06	1.1536e+06	1.00751e+06	1.92709e+06	1.94659e+06	1.54224e+06	1.54254e+06	1.46993e+06	1.32326e+06	1.45982e+06	1.8638e+06	1.7642e+06
POS	M129T342_2	129.064	342.374	1.09361e+06	904787	1.46228e+06	1.10954e+06	761387	927582	1.2697e+06	1.42559e+06	1.07377e+06	741205	1.35607e+06	773217	562985	733537	1.54059e+06	954030	1.20995e+06	1.24348e+06	1.0226e+06	1.54613e+06	1.38218e+06	1.26416e+06	969495	1.30766e+06	1.49831e+06	1.00112e+06	1.20629e+06	1.0801e+06	1.49493e+06	1.04314e+06	1.10728e+06	941133	1.2641e+06	1.57939e+06	1.58676e+06	944221	832198	1.51287e+06	1.28319e+06	1.18569e+06	895731	925976	1.01282e+06	1.13721e+06	1.38056e+06	1.11044e+06
POS	M129T434	129.063	434.198	168103	151649	133558	194104	127670	150739	129160	168901	136580	113953	207310	153495	130970	212985	193373	175371	183120	183861	164910	163992	204980	191246	168664	212827	151635	68176.6	204563	189549	178353	188804	179989	114462	127924	182391	134701	177475	162110	207362	210738	184774	204455	146978	197982	200208	246125	166612
POS	M129T368	129.064	367.562	619338	470142	723878	661592	541509	472595	623870	684233	666206	735649	583067	521122	486322	500089	601975	485898	972520	608731	531319	694770	949326	822104	674429	836596	644694	642318	773433	591763	595697	601249	818074	482667	873959	640682	599315	456803	486435	629840	641755	803465	841935	519644	519133	546426	679090	617361
POS	M129T208	129.063	208.378	54292.6	62410.2	52211.3	65330.3	39976.1	37796.9	95180.9	48713.7	36887.9	92888.6	65838.5	50788.9	29207.9	59992.2	29004.2	39189.2	75905.3	61997.8	65458.3	30249.5	33318.4	28124.4	32293.6	88979	57411.7	26608	52641.9	75477.5	61384.3	63443.8	41442.9	30890.3	61567.7	58379.1	30297	24975.1	53469.7	48819.3	60312.7	51287.7	53311.7	58850.3	62352.3	50386.3	61833	37101.5
POS	M129T88	129.063	87.9405	21601.9	14074.7	13776	24284.4	19181.7	21605.9	26922.6	15742.2	17610	18472.7	8671.41	19750.2	15490.8	22415.3	12955.5	15088.1	17413	14346.7	10140.6	14388.3	11886.8	10231.5	13817.1	11020.1	14707.7	8053.32	13721.3	11589	13675.9	20307.3	10789.6	20993.2	13284.6	13603.5	19429.8	19002.2	20920.3	23420.3	57359.7	12157.3	18023.4	17815.2	23970.7	14275.4	13187.1	15328.3
POS	M129T412	129.063	412.189	187771	80969.1	227914	129714	164679	68798.2	108362	198965	228732	143393	255409	185892	197740	27178.4	247311	254924	88138.6	123919	63832.3	182864	137679	120410	176663	143176	239045	101793	192092	297995	116791	263603	269482	157555	246188	90922.3	126691	218496	73119.3	243775	264675	203104	263555	72165.3	94006.2	85940.5	116135	191440
POS	M129T156	129.063	156.105	43508.3	41514.2	48062.8	43367.6	37721.9	40851.9	58102.4	44854.3	55874.5	41702.9	53039	34277.6	39392.7	47194.3	47998.4	40464.1	48812.8	49835.9	57908.1	51395.9	44526.1	174254	65591.2	47167.2	42882.6	43752	42653.5	52244.1	46532.5	59101.3	79421.3	38599.5	57702.4	47325.2	50937.2	46722.5	48861.2	49667.2	48860	38036.2	42833.8	46353.9	47580.9	55496.1	50787.4	53828
POS	M129T25	129.083	24.784	1048.1	5642.13	1799.01	1242.23	2049	574.647	1560.76	1474.44	1063.73	1367.21	980.184	1963.7	1060.36	1949.33	608.506	2791.81	1758.15	1912.1	1555.56	1046.21	569.015	1150.71	1205.75	609.812	1489.97	595.858	1755.6	1525.26	2073.68	1785.96	992.102	1840.65	1967.82	1037.86	1920.38	1275.25	1227.07	1111.84	1518.01	1809.36	1135.19	1529.13	1167.58	984.31	2311.67	1354.92
POS	M129T91	129.1	90.6135	93512.2	8732.29	76632.8	128016	76207.7	122477	111281	71063.4	64514.2	44630.1	9508.35	67205.6	12288.7	83281.3	18684.1	85183.5	63517.2	90303.4	9051.88	11500.9	11925.8	8787.08	11179.6	10792.5	11474.7	8594.54	12150.8	10337.8	10855.7	12246.8	9681.43	65166.3	12003.6	80553.7	82297.5	96828.5	111231	15160.3	48518.8	10352.8	14636.5	72801.1	125200	11836.5	86056.9	13077.5
POS	M129T47	129.1	47.388	13783.2	66666.9	71490.6	40817	56489.8	58974.8	55383.5	33104.8	8477.78	42338.9	12045.4	6302.04	10344.9	8542.69	20070.2	12585.4	12819.7	15589.8	11503.7	11782.7	15637	13589.7	14863.5	18077	8083.74	5540.3	8342.62	14651.8	15396.6	15713.2	14122.9	13318.8	7480.73	11809	20102.4	15642.5	12682.8	14998	12204	9669.33	12439.3	10627.6	13564.4	12353.9	13713.9	15561.6
POS	M129T504	129.1	504.396	11078	15131.6	14267.4	10812.4	8834.42	15974.8	15905.6	6805.71	234.04	12067.8	16373.2	13259.4	12801.6	16254.8	351.854	12268.9	13176.2	16097	18139.1	7611.03	19846.4	18298.7	17259.2	313.571	17500.4	12319.5	15166.8	17370.6	10111.8	15081.5	18480.5	14616.9	12788.4	17334.1	9019.04	12005.9	15525.6	16542.3	380.87	13097	10793.5	7451.26	14027.3	10906.3	10259.3	9468.99
POS	M129T259	129.111	259.439	377.677	497.548	572.767	435.748	874.882	384.962	470.65	354.195	423.813	574.84	30578.8	1040.49	865.114	1072.81	832.983	608.45	683.909	5027.58	515.266	555.552	892.63	336.817	620.485	834.108	440.847	33567.5	445.01	995.577	464.107	508.444	23253.9	513.99	21279.1	780.198	8266.38	25324.9	561.264	449.401	740.884	540.839	407.029	344.431	1173.22	1006.4	898.237	724.504
POS	M129T26	129.116	25.5575	1607.23	1906.85	2611.09	1771.44	2097.82	1461.56	1955.15	1842.26	1976.4	1679.42	2210.59	1752.34	2220.23	2136.56	2217.06	2367.81	1802.62	2145.35	1844.21	2175.48	2078.29	2415.65	2072.98	1555.06	2610	1545.54	1258.65	1956.86	2181.29	2191.99	2099.35	1235.37	2015.74	2147.28	2169.88	1846.47	1678.54	2045.75	1827.36	1790.45	2358.15	1342.75	1990.04	1891.02	1922.28	1748.91
POS	M129T54	129.136	54.464	36120.4	1897.16	3446.36	28752.3	2010.9	1092.4	2944.88	2290.33	1813.68	28186.9	3141.41	2326.8	2990.35	2746.67	4264.18	3485.86	2699.15	810.667	2291.3	796.951	664.247	1223.56	3893.76	1287.19	657.129	2344.76	819.938	3507.82	1340.96	3012.62	1654.2	1150.05	1814.19	2045.89	3058.66	3263.87	636.379	937.179	2758.76	1388.36	1260.45	2822.9	691.268	4063.22	2427.61	3055.58
POS	M129T148	129.136	148.281	2502.21	2922.07	40111.9	2371.88	37842.1	3164.21	45763.5	39032.4	33813.4	4364.29	1671.69	29765.1	33662.4	1971.76	2023.34	28378.7	4180.01	4089.1	2480.16	25896.6	40606.3	54119.8	52639.5	1848.83	1878.06	2433.2	43321.4	1880.17	42938.9	69813	1902.17	27384.4	64205.2	35529.5	5334.91	2592.88	23958	34154.3	31521	36312.5	1651.73	2128.04	2427.46	2867.63	62753.8	2673.86
POS	M130T359_1	129.657	358.833	2470.93	1803.67	2211.12	2952.84	1262.87	3246.69	2923.82	2754.59	2282.16	4700.56	2789.71	3379.05	2253.42	2500.77	2317.67	2383.78	2917.45	3721.86	3836.48	3001.35	2349.29	1642.37	3098.53	2662.71	3495.08	4596.01	1739.77	2860.02	2932.44	2735.02	3226.62	2417.81	2277.25	2033.74	2768.74	2224.34	2533.86	893.95	2129.26	3374.14	965.841	3211.04	1278.06	1409.42	2666.21	3005.14
POS	M130T209_1	129.657	209.282	834.68	318.772	877.893	774.785	448.537	337.477	951.424	633.457	419.584	1117.96	654.983	293.581	300.764	594.486	233.562	255.405	840.753	659.63	850.715	157.498	330.794	200.953	328.869	1140.49	589.64	319.114	254.305	954.295	1122.43	819.623	558.693	295.112	307.838	802.39	250.846	237.437	790.321	817.421	551.711	490.801	786.041	444.453	981.011	550.186	822.31	467.443
POS	M130T257_1	129.694	256.923	809.623	685.556	1204.42	1171.37	884.063	440.791	1033.04	1116.34	1312.97	833.52	1406.37	970.647	845.934	2626.35	1413.03	2449.16	1409.99	1705.88	672.819	934.242	813.999	1211.54	1701.91	916.725	1169.08	607.411	1855.84	2227.52	1217.9	1084.62	1251.02	672.763	879.147	2161.45	1922.53	2163.94	941.46	1601.46	1105.86	799.832	1064.49	1535.39	2287.87	1041.68	1603.46	1199.82
POS	M130T349	129.954	349.181	91147.5	91321.2	91519.8	94394.2	98716.8	97876.1	94332	98029.4	91106.4	90980.5	91692.9	94385.6	102266	111008	101706	96955.5	91018.2	91837.4	96728.1	95803.6	89760.9	83231	88678.7	92913.6	89778.9	90761.4	93971.1	99838.5	91041.5	94221.5	84311.3	96225.7	94093	85591.2	97300.8	104486	88063.2	93033.1	94606.3	90872.4	107511	92753.7	95538.9	99100.2	99912.9	92033.4
POS	M130T87	130.022	86.775	14728.2	878.696	20457.7	20616.4	688.393	11266.2	29566.4	10695.6	38175.8	8029.09	11822.8	11018.4	21181.1	23236.9	2152.03	6632.59	5639.93	4906.46	3670.7	4142.79	8405.68	4348.55	8184.15	18681.3	6593.12	6711.78	2127.11	3039.8	11989.7	2853.7	2292.23	3283.73	3570.24	26338.8	28498.8	3303.33	7215.54	16283.6	3760.99	2113.61	26815.3	27367.5	38845.2	32497.3	27985.7	34003.9
POS	M130T191	130.022	191.054	1911.61	1141.65	1674.36	1551.92	1461.79	1738.57	1897.59	1236.02	985.899	2857.72	1203.21	2297.29	1965.03	1168.24	974.597	1166.9	2359.39	733.864	835.601	609.249	1886.19	1391.96	1617.08	1279.57	1199.3	1493.01	1422.55	1272.61	631.641	1290.44	909.708	2658.05	1241.58	2956.69	1669.33	951.848	2124.57	954.83	1445.81	2041.4	1283.08	2703.96	1227.85	2106.67	1849.22	1559.41
POS	M130T209_2	130.048	208.983	209173	80897.7	182547	241625	131927	88972.5	249410	177628	89494.2	360742	199558	67528.4	57601.8	183351	47960	50927	251938	206910	229764	42932.2	70546.4	45448.9	77556.4	391037	197062	50810.2	126635	307298	234509	261333	172674	75326.6	101309	219511	75798.4	42986	209799	161547	113936	117819	200438	102582	241367	170998	240308	101470
POS	M130T377	130.048	377.463	262811	324717	262830	262949	307483	302049	287880	348853	234379	330221	315436	328626	466239	310229	268108	281227	317246	359783	383096	331593	294707	361442	297555	291456	349587	427598	323388	264192	236962	253388	314227	382443	376029	279876	267256	314105	296206	316634	345456	332406	312250	365321	254644	293992	296860	321887
POS	M130T300	130.047	300.134	64693.8	19236.5	41323.9	47417	30755.6	36270.8	51387	45616	53906	37931.7	29686.3	42048.7	25168.7	32116.1	24387.2	28959.8	28410	27351.6	25507.8	28990.1	30432	30156.5	32764.5	36291.9	31712.2	26105.1	18912.4	31985.7	34980.5	20227.7	18303.2	39387.3	27954	59512.5	52515.1	31170.7	37431.3	34786.3	33937.4	29076.2	36084.7	41710.5	52472.6	38260.1	42013	50733
POS	M130T241	130.047	240.791	13719.5	4630.58	5440.67	9124.11	58682.5	19483.5	16615	72555.3	11744.9	2533.09	23920.9	6278.8	41432	5566.25	4410.77	4803.16	5082.76	8310.91	6241.31	21380.7	5500.51	2027.5	4967.1	7504.12	19204.5	3620.42	4986.54	4875.79	5706.21	5320.17	23972.7	4964.51	32517.1	14693.2	4848.81	2503.44	31467.6	13550.3	17952.9	8212.28	6139.39	4832.56	4422.71	93357.8	7333.21	3312.07
POS	M130T359_2	130.049	359.418	709985	899937	734247	716432	720178	841186	763141	677589	653380	1.49977e+06	696821	736422	612236	445771	618231	687087	730789	750252	968562	771763	746109	748383	739104	704490	778724	1.4041e+06	752701	735212	693473	644876	695765	1.11773e+06	802257	742170	733170	491014	916337	761189	701650	804813	711286	858572	682460	710885	640410	799948
POS	M130T239	130.063	239.263	37479.7	37062.5	40263.7	44229.5	38470.5	35169.8	34548.2	35037.7	40075.6	31614	41098.4	43709.9	41600.5	38047.7	38672.8	43453.1	36533.4	32702.4	37297	38967.2	39638.2	34191.8	35853.7	34134.5	37430.8	35787.2	34604.7	37010.4	40026.5	35939.1	42527.1	38604.5	44332.1	35684.5	38291.4	43002.4	33669.4	40444.6	37815.1	42095.5	53772.4	38062.1	40437.6	37273.2	41189.1	45485.4
POS	M130T42	130.063	42.225	127801	102397	149507	130736	158624	133149	188703	141156	222062	145663	129035	137100	178546	199434	145684	137184	182486	172352	116230	181222	109940	162309	155302	177124	138232	120968	163076	120377	131902	235376	150149	142890	143046	99272.1	143531	223424	167666	141346	145451	128174	158144	209380	151462	130809	205267	150130
POS	M130T619	130.063	619.491	141557	151441	181544	214422	195457	157702	107406	43462.5	203042	104229	305258	142969	166857	148730	193784	180834	3060.69	152820	113242	257989	192648	223080	187437	3283.21	286600	108994	228778	150585	502607	282789	282493	57190.2	442466	197157	279085	135605	314955	84752.6	205184	88131.1	143725	65741.5	145440	219613	3072.53	179317
POS	M130T137	130.063	136.918	221447	126626	172646	208051	187005	131823	123910	229773	157476	110866	232748	223586	235243	214978	182475	210235	161559	161988	198015	191873	216207	158403	171907	162799	190882	187566	146313	230280	223302	164801	199321	128090	236356	207902	184322	158379	215252	162155	185113	190341	242114	149772	192772	182758	262903	495231
POS	M130T119	130.063	119.395	274064	276387	275775	260293	90408.1	276096	224472	303534	159945	228758	354538	1.1699e+06	297765	262449	136339	211384	116255	204019	248933	250470	122408	241220	260834	206732	247648	267095	219224	242028	205506	149835	261024	303239	133026	251897	288260	270225	203719	185454	254594	250449	358404	173389	158933	258328	248732	276672
POS	M130T96	130.063	95.905	138180	196810	237999	750681	722210	258078	114396	97247.9	545930	95242.2	462961	222013	277190	143972	144109	156104	135947	108333	116151	119446	126376	109816	115603	420663	106696	135772	99612	110802	537319	492455	299979	227636	153545	130144	123561	141839	87268.8	88364.6	113878	134135	154254	96042.9	506521	143069	134734	140931
POS	M130T14	130.063	13.928	61814	63528.8	67069	63776.7	58751.9	51313.1	67537.8	64099.2	47171.2	40379.2	65230.8	56662.3	59012.5	39287	71676	65018	57643.7	57430.1	54372.6	18422.3	62157	59028.1	69928.4	58712.6	64103.7	48913.8	62673.4	81284.1	63823.7	63661.8	66823.7	51151.1	64085.2	256.255	63896.8	35686.2	55940.2	65582.2	64748.5	55895.3	67256.2	52848.4	65718.9	67309.1	56360.5	61317.9
POS	M130T677	130.063	677.168	31277	25602.5	26748.3	24900.3	25584.9	52744.6	6027.92	26109.6	27387.9	22955.7	24939.3	24311.6	26057.2	26363	25928.1	26933.2	22329.8	23753.2	22439.5	27577.1	26449.4	25375.1	25178.4	68189.7	25582.4	22058.7	24404.4	26446.2	28139.3	26603.2	26583.7	22071.2	26647.9	26090	25368.3	27517.6	21740	25908.4	26915.9	23676.8	25796.5	21530	26459.2	23067.6	24938	27126
POS	M130T328	130.066	327.535	75404.9	150853	104999	86503.4	59490.3	54558.1	94796.2	109971	108183	102751	103731	67263.2	52259	64181.5	85215.9	58457.4	97087	76932.5	62389.4	91194.2	85410.9	112538	96762	74208.3	98163	73899.1	76138.2	65320.1	89757.1	71868.5	105566	54946.6	154417	107131	89182.7	54385.8	46995.8	93093.9	88512.3	72958.5	77471.8	65952.2	60669.7	67435.1	84754.1	85010.8
POS	M130T342	130.067	342.428	63354.8	49840.2	64870.8	64309.2	35366.7	43206	59116.9	51188.4	70956.9	40830.3	63399.2	45692.3	26196.4	35972.2	79227.5	51106.2	55191.6	52750.5	61537.9	79690.9	63233.5	71624.5	60387	64386.7	69088.7	41203.2	63256.1	64696.3	73372.4	60538.9	70647.4	41061.2	68362.1	83525.5	70811.3	52999.4	50008.3	76903	68093.3	55808.7	41823	38129.6	45010.4	57744.9	69433.5	44212.5
POS	M130T25	130.08	25.489	30640.6	24473.1	34840.8	33056.7	29872.4	23969	28716.5	37647.7	32297.3	32249.3	34285.9	31421.7	30170.1	38797.5	41347.5	34775.6	37147.6	30177	34216.3	31720.7	28906.4	24982.1	31103.2	30161.7	39906.5	28163.5	31682	34900.9	30545.4	30816.3	37647.4	27364.6	34928.6	19289.9	30224.5	34320.9	29260.9	31347	33456.4	32260.7	32060	23574.8	30508	32048.8	28429.3	34556
POS	M130T257_2	130.085	257.367	504265	248692	701312	613125	357626	149695	735482	458233	384390	461589	575215	351459	344003	913846	931056	1.08956e+06	714866	1.3246e+06	509448	342670	333273	638741	629590	228056	591088	568498	906313	1.05984e+06	499104	561810	542612	341675	307671	951204	881808	930712	405149	1.11272e+06	516140	323274	437951	619275	1.05868e+06	402922	651183	689544
POS	M130T293	130.084	292.913	216464	232110	274553	150694	180290	139096	154684	179511	214393	214328	150596	195883	253323	288646	260423	196916	167182	269038	591144	141467	144844	262023	202467	150588	150285	89786.3	183974	170864	230952	131446	139755	168317	188061	143887	250598	166259	223338	200492	231126	149783	635225	201013	305766	197190	151833	145295
POS	M130T505	130.084	505.45	143487	150041	141787	197437	143386	140759	155648	130598	145653	104902	139372	158354	251576	239170	135792	233224	130280	147320	137765	132419	141416	133494	138564	144547	151490	78895.7	120835	155847	154745	164577	141756	146491	207861	143412	140933	223952	125796	162180	186519	111789	262543	123189	271289	171726	160670	114543
POS	M130T315	130.084	314.542	38393.7	30084	33524	47776.7	24055.8	33777.3	31591.6	45790.7	46179.2	33171.5	29922.5	21552.5	17065	52144.2	36545.8	43531	25479.7	64384	57263.6	32606.4	25570.9	38310.4	28733.6	25375.3	21237.7	33903.9	23557.7	46969.2	17363.5	21045.9	23785.2	21324.8	24390.2	46553.7	49906.7	24695.3	33558	49318.1	23585.7	30986.7	48177	52801.9	54900.5	31842.2	27194.4	33829.5
POS	M130T519	130.084	519.423	71885.1	113539	79393.6	105001	103344	59782.8	90206.6	80054.9	78642	66725.6	94963.9	74519	113960	168390	70424.6	101029	114822	141825	80217.2	102689	72785.2	82667.8	76315.7	58642	111868	48024.5	87842.1	91238.3	64791.3	98650.4	122503	66065.2	118578	108559	91919.3	102049	48193.9	141608	114214	70974.4	118783	90501.1	133005	61761.2	147511	82600.2
POS	M130T46	130.084	46.4325	40130	36280.7	1416.83	3533.64	41685.6	24813.2	37774.5	2144.48	21086.4	1661.39	44073	37348	39987.7	3207.11	69626.9	2655.99	37193	6308.01	1886.57	1298.71	47714.8	68804.7	57057.9	3269.83	2934.96	3543.05	35986.7	2295.83	2700.05	60993.1	46174.2	4283.53	2951.9	3316.03	20970.8	8683.97	1771.34	99588.1	37774.7	59830.7	53422.2	54731	3366.47	3080.31	56566.8	4255.52
POS	M130T208	130.084	208.075	15518.7	8994.27	43928.1	17279.1	20780.8	18419.7	18045.2	21949.6	21574.5	7707.17	12593	8465.09	19507.2	11389.8	10057.5	14542.7	9434.37	10449.2	7445	11694.4	11950.3	10732.5	8853.29	9240.52	9801.56	8351.76	7768.03	10892.7	9931.7	9988.15	12092.4	8048.31	10490.4	12098.5	9887.4	16159.9	8748.67	10368.2	12473.2	10230.9	12711.1	9611.87	14255.1	10866.7	11083	12402.6
POS	M130T91	130.103	90.941	5563.85	119488	3438.88	8352.56	4124.04	9267.58	9171.45	3691.92	4578.51	90628.9	140319	1897.35	153204	5003.67	549.281	5022.24	4111.96	3991.46	105977	121452	128640	106035	107239	116650	110133	102880	105886	124714	148629	130883	149885	3239.67	152641	4815.59	121513	8653.67	7213.16	125425	2990.64	126917	162656	4849.76	7481.63	135178	6958.08	137127
POS	M130T36	130.12	35.7375	85.2957	44.4691	141.112	82.3739	139.557	4536.83	4839.45	61.8116	149.162	20671.2	21.682	1823.38	124.272	4980.6	171.005	87.0707	5869.49	190.369	3851.94	4413.2	3393.72	4083.91	3792.54	4213.44	3683.23	3614.68	2344.36	5120.9	2954.43	4189.39	6404.46	2015.5	83.8599	3246.14	5960.57	5572.66	84.5149	3708.76	2704.66	3234.47	5351.2	3180.53	6040.86	3662.74	76.0614	3274.03
POS	M130T165	130.131	165.335	32929.7	39715	10291.9	17636	16015	5326.76	14584.6	9828.92	5077.91	3444.92	5520.34	2587.38	5854.15	4758.35	3497.99	4592.42	4062.17	3822.58	4515.18	3464.94	5323.06	3861.78	3436.33	4555.29	4018.95	4752.05	2757.9	6895.5	4688.61	5583.88	5133.64	2971.12	4783.07	4440.65	3194.12	5599.13	5501.24	4400.48	4649.66	3789.99	4235.83	5617.52	4941.31	6667.86	5706.78	6835.42
POS	M130T147	130.156	147.433	23678.8	15885.1	18526.8	24855.6	26147.1	16500.6	17774.2	18462.1	32486.6	18791.3	32879.6	20997.3	17692.7	20750.4	19472.2	16793.4	20890.3	31923.2	17165.6	30880.1	21409.8	16329.9	23079	29759	18487.9	15980.7	17975	20263	19500.3	20711.5	17290.2	32984.9	19961.2	17416	17238.5	24104.9	21925.7	17982.5	20247.7	16953.8	21654.2	32122.6	18914.9	18044	32756.3	16445.4
POS	M130T26	130.173	25.6935	3403.48	3520.07	4041.64	3750.83	4292.1	3788.39	3591.77	3811.41	4011.5	3538.94	3530.23	3802.78	3738.32	4669.93	4089.59	4088.53	3994	4157.02	3806.45	3910.16	3943.49	3502.75	3647.98	2900.05	4103.5	3394.46	3743.98	3746.6	3675.92	3788.82	4021.14	3755.14	3972.03	3825.03	4212.29	3514.81	3962.7	3553.42	3846.82	3704.7	4108.92	3270.02	3340.23	3819	3433.78	3724.74
POS	M131T349	130.955	349.397	48442.7	43161.9	49138.8	46970.4	50450	47562.9	49799.7	48790.7	48787.7	44294.3	46965.1	46574.1	53596.5	32091.8	51054.1	51148.3	45237	47886.5	46549.3	44838	45296.3	40130.4	47442.1	48678.4	44796.4	45271.3	46141.3	50728	44126.8	48990.7	44887	47341.2	49954.1	45873.2	48221.3	52852.3	46379.2	47226.9	46157.3	43340.9	31183.7	44289.6	46827.9	48386.7	48537.8	51184
POS	M131T192	131.014	192.254	768.521	3859.42	454.689	1460.94	790.4	1272.35	856.618	460.487	587.116	1266.84	3437.8	3037.92	1676.65	2416.54	823.472	2297.67	1450.44	1197.78	1211.3	3014.28	3339.1	3501.25	3512.33	1157.15	2976.4	3005.26	3033.5	1247.34	3970.59	942.754	1373.95	2702.57	4109.45	1554.77	2332.26	1482.9	2186.81	3039.27	3047.86	2896.27	1972.37	1791.93	1012.76	1215.75	907.233	1760.42
POS	M131T377_1	131.031	377.333	1717.76	1355.3	1259.8	1636.87	1473.29	1440.83	1209.44	1003.72	919.32	925.265	1598.93	2759.73	3505.51	1867.26	1725.31	1544.94	2001.77	2356.71	1905.66	2022.58	2022.73	2327.78	2036.99	1589.17	1720.81	1455.1	2036.62	1982.69	1948.43	1501.62	1291.24	2103.66	1513.08	1174.01	1261.61	2144.96	1637.49	2281.1	1856.51	1526.2	1530.16	2047.1	2098.8	2268.59	2191.2	1993.02
POS	M131T240	131.047	240.015	35515.1	45193.7	46407.6	43558.4	38385.5	39635.5	43529	34971.3	31954.6	61074.8	50870.6	39944.2	48483.6	39183.5	30502.8	53609	36640.2	35412.7	44184	30643.9	39773.2	29258.1	40042.9	38119.3	43560.4	31321.7	39154.3	39439.2	40407.6	39584.6	47565.4	45373.1	65966.7	33942.3	33736.1	40760.5	40683.8	36794	47919.6	40891.1	46949.6	34748	40018.9	43849.7	40421	39560.7
POS	M131T359	131.051	359.245	38502.2	47359.1	37782.6	42288	41817.7	41793	43849.5	42581.8	31865.4	77290	41188	43266.3	36938.3	26613.8	34304.9	33359.2	45371.8	39473	46865.4	40376.9	44325.9	42941.5	47509.7	38557.6	41909.2	69996.7	42236.7	40168	42699.8	37214.6	41854.9	60896.2	47961.4	44684.4	43768.1	26095	47191.5	39557.3	41197	45929.6	37224	49532.6	42155.6	41522.9	37993.4	39359.5
POS	M131T209	131.051	209.04	11947.9	4378.81	11533.4	13528.4	7855.58	3130.9	13011.8	9024.11	5552.5	21080.8	11087	3127.4	3486.52	10769.5	2489.96	3164.68	12722.3	12969	13271.3	2004.55	3621.55	2718.93	3962.01	24635.2	11521.9	3086.5	7344.46	16102.4	13524.8	16026.5	10186.5	5205.97	5296.17	13934.1	3689.39	2273.6	12450.7	8850.03	6296.1	5952.04	9949.79	5864.5	14531.7	9976.64	12913.5	5114.85
POS	M131T377_2	131.051	377.468	14162.3	18532.5	14045.6	13589.9	19811.7	20083.5	14247.5	18401.9	12842.3	24599.6	33121.4	18117.4	35149.4	16541	32498.9	33678.8	17806.9	19408.6	20494.5	17882	15463.1	19438	14831.8	16251.9	14460	19858.5	18386.9	15234.1	32993.2	13547.7	13754	24127.3	21238.9	13424.2	17093	16796	18894.3	19075.6	18502.5	18108.5	14903.7	23120	13920.9	13353.8	18649.5	18705
POS	M131T328	131.068	327.646	11764.7	12735.3	10999.8	13314.7	13864.5	3883.89	14882.1	9974.26	16790.9	9823.56	8935.86	6463.5	5867.11	9889.78	7948.29	4539.77	10608.6	7178.75	6279.25	7579.95	8782.04	12677.8	8132.52	6047.11	7474.3	7287.41	7566.61	5372.09	10873.2	5623.83	9339.02	7100.19	16967.7	8940.69	10055.2	9101.21	3919.82	7438.91	6721.78	6742.77	5190.47	9899.85	5106.12	6325.41	11464.1	9138.04
POS	M131T239	131.067	239.381	5392.17	4189.19	4391.95	6081.87	4429.46	5055.91	3939.42	5349.94	4061.27	2078.9	5885.1	4595.53	4741.29	4503.62	4430.89	4458.26	5033.49	4392.11	4550.11	3410.18	4405.12	4811.72	3527.78	3825.34	5024.72	4565.47	4928.08	4893.47	4830.56	3496.9	4381.91	3463.72	3638.1	5516.41	4192.83	4603.68	4987.97	4413.81	4736.3	5091.28	4840.73	3938.6	5109.71	4486.24	4804.39	4722.61
POS	M131T112	131.062	111.923	39087.6	8658.3	31036	24046.7	141411	19393.2	5961.04	73852.3	18078.1	4582.6	5128.79	12405.4	9794.63	9445.78	3364.08	7721.46	6660.15	7930.66	5352.13	6590.56	4826.8	6131.28	6896.41	4952.23	5839.53	1942.05	3945.03	6197.36	8233.51	5630.24	6208.01	24660.1	9864.48	8881.89	7218	7558.01	6228.25	7010	7894.76	9123.32	8571.84	5941.61	7423.91	4952.91	8265.36	7903.08
POS	M131T343	131.068	342.629	2652	2526.29	4716.99	4614.54	2278.09	2477.56	3741.94	3446.48	5237.68	3318.74	3828.66	2986.79	1319.18	2260.9	6496.73	3242.28	5381.2	3873.6	3963.44	4653.92	5718.69	5952.35	4408.78	4644.6	4958.6	2893.4	4465.25	2977.12	5775.86	3469.58	3898.64	2983.9	5454	4722.41	5793.85	2705.18	2634.12	6866.77	4279.43	4592.97	3646.23	2647.72	2560.07	4099.96	3857.61	3643.84
POS	M131T44	131.083	43.953	11865.7	13759.7	12376.7	12649.6	11733.7	12125.8	4607.29	11928.9	3258.95	8277.61	3829.34	3447.61	5613.9	12586.2	3866.34	3221.64	3866.66	3549.73	11386.9	2907.39	2711.36	4117.08	10167.2	5339.86	2590.33	3873.3	11660.5	11388.7	13360.3	3995.54	13968.6	6341.68	12762.8	11083.4	3660.02	14125.6	11274.5	12556.4	11095.5	9360.69	13314.9	11727.6	12312.6	6038.67	9497.38	13697.3
POS	M131T317	131.079	317.238	28870.3	32263	27217.5	27369.6	12741.3	18987	24405.9	22500.2	55142.6	16875	17148.2	19567.5	13222.9	17288.6	18456.2	22360.2	20575.8	18779.3	15659.7	19046.6	18613.1	16790	19123.4	18812.8	18422.1	9816.34	15461.2	15226.6	19556.6	17603.2	17570.2	22547.8	16193.4	21825.2	53171.4	21093.8	18068.2	17469.5	21862	16274.5	15755.3	19212.3	24493.8	17766.1	31176.5	28501.8
POS	M131T257	131.087	257.281	18734.2	17025.9	30811.1	36244.8	20811.4	16300.6	31486.8	29260.7	30465.7	20579.8	37576.6	19879.4	22138.2	56041.7	53897.9	61952.8	39726.2	81098.4	24619.2	17857.2	21679.9	36363.4	35136.8	39502.5	31910.5	20909.1	52049.9	59153.6	31752.1	30881.7	31464.4	20630.4	19270	53751.1	49457.9	54019.6	24991.4	66126.8	29601	19699.3	23441.9	31939.2	62986.7	24933.6	37519.7	40534.3
POS	M131T294	131.08	294.134	11072.8	14790.3	13351.9	23357.4	13168.7	21065.4	15736.1	18116.3	22605.7	17066.7	27629.9	25594.1	48245.1	42455.3	14861.7	19778.7	7925.8	17098	38394.7	5360.37	16787.9	14684.5	22486.2	26081.3	23699.6	9038.33	8092.4	15495.4	28626.9	11866.2	15605	16468.7	24347.8	18637.6	26341.4	18072.3	13728	11729.8	20073	12561.6	41961.4	23166.5	30399.6	34129.8	23586	23130.8
POS	M131T500	131.098	499.751	1116.94	2567.08	29968	976.344	10262.8	599.786	1323.98	15239	1168.27	1134.67	1369.78	1396.47	1252.6	3011.32	2411.15	1786.19	526.976	28371.2	22036.8	1054.96	1099.34	36173	1772.86	33983.3	1563.53	15894.5	1243.43	982.521	1881.23	2013.07	37490.3	1197.53	3520.9	1192.58	2403.99	2162.71	20259.6	2208	1193.65	20552.7	2446.72	460.597	2388.91	1572.01	1289.24	1947.06
POS	M131T35	131.104	35.0915	2544.76	976.957	2645.89	738.288	2605.93	1148.97	1191	2101.87	1955.58	1011.33	2181.57	1280.4	1638.5	2106.64	2133.49	3143.58	1754.3	2742.49	862.653	1428.02	916.91	2652.55	1720.13	2898.65	806.603	4213.61	1324.75	1005.56	2085.44	2057.5	1535.75	7672.2	1328.16	2519.93	1604.42	1615.57	3109.49	1729.35	2229.31	1526.87	1434.8	5546.69	1328.7	5003.81	2151.1	1480.25
POS	M131T137	131.115	136.762	10040.9	11394.8	6071.5	8397.81	10523.6	10894.9	5740.95	9374.92	5083.2	4600.64	10821.3	1862.09	1418.63	2644.47	1412.22	11079.1	2040.71	2906.83	10220.6	9587.52	11683.7	8292.24	9191.66	10520.6	9181.01	8569.84	8014.81	10912.5	11923.4	9432.84	10204.1	2505.64	14459	2816.6	4692.17	2888.01	2687.78	9760.99	1582.58	10017.1	13955	11442.6	3965.13	12627.1	2264.48	11549.9
POS	M131T334	131.115	334.132	12412.6	3110.16	1804.67	1321.97	15898.8	7387.2	13656.5	12144	1338.75	4121.03	13552.1	7230.3	4549.4	7770.4	11285.9	5332.12	975.248	1779.37	5141.7	6108.29	13127.2	1578.15	11667.9	8919.14	1992.04	5363.18	3876.06	5420.3	7378.69	4418.01	13538.9	6516.46	3646.69	7750.6	8767.06	7367.37	5215.82	9743.99	1357.65	9037.76	8646.73	8576.79	7980.47	7146.89	6607.11	8060.2
POS	M131T147	131.16	147.418	2201.56	1113.91	1739.61	2285.58	1903.93	1122.74	1608.3	1502.62	2927.46	1580.79	2339.55	2396.9	1675.13	1553.76	1670.64	1539.29	1737.63	1932.31	1402.37	2641.94	1905.89	1758.04	1944.75	2883.64	1858.76	1157.16	1516.04	2180.17	1864.48	2212.5	1950.59	3530.98	1564.33	1590.93	1657.14	2708.31	2570.62	1715.92	2197.53	1332.17	1879.57	1804.37	1728.64	2216.6	2076.56	1962.58
POS	M132T330_1	131.678	329.87	2038.38	11247.8	4298.41	4566.87	5094.84	1629.15	4161.03	4577.1	358.229	3968.25	3447.45	3694.96	6114.39	3927.78	3412.21	5106.42	3424.04	2830.1	3251.46	2646.21	3126.91	3405.89	4563.41	2133.16	4373.46	2843.26	2272.38	2693.21	3998.11	3160.29	3841.79	1772.74	14315.9	3071.66	2580.81	4390.78	1513.57	3412.97	5246.36	1478.3	2444.29	3911.41	3424.81	3732.32	4661.77	3807.94
POS	M132T248_1	131.703	247.927	2162.93	1916.99	3198.23	2345.56	2752.36	2552.26	2608.01	2115.21	1589.5	2001.33	2524.64	2274.43	2768.87	1860.28	1990.97	3261.16	1854.69	1856.1	2330.55	1740.4	2478.15	643.667	1996.67	1805.84	2468.98	1947.05	2148.72	3526.67	2399.14	1915.34	1994.71	2246.82	2791.56	1920.16	2089.73	2127.96	2196.28	2059.64	1911.68	1580.08	2772.47	2098.41	2632.49	2846.1	3141.46	1827.49
POS	M132T28	131.976	28.2465	2818.23	693.856	1115.01	1165.7	56.2407	2309.86	1609.04	901.8	2869.69	3700.24	193.117	674.602	989.521	894.606	0	83.6503	148.194	822.622	83.4331	35.3229	31.9487	82.317	112.131	1013.19	110.572	1270.1	73.2429	40.9891	155.662	69.4341	31.89	395.573	40.9934	7926.19	2250.69	147.31	1947.58	903.222	110.818	68.2253	1903.57	7361.41	2136.67	3219.93	3207.33	3362.01
POS	M132T33	131.991	32.535	23946.3	18644.3	12359.2	13851.6	20698.5	9634.87	18236.4	20780.2	8804.85	10152.8	1834.92	1573.27	2349.27	5162.43	2907.45	2408.85	2832.87	4356.2	1275.78	2038.15	1652.98	794.103	525.687	2140.4	1169.88	1354.29	403.043	2108.42	2580.33	2231.33	1646.91	1577.13	762.237	5836.98	4312.51	2783.74	4184.64	1681.4	2767.83	479.064	2822.68	4850.31	4938.58	3697.19	3962.52	1921.52
POS	M132T42	132.042	42.364	64002	37342.4	45881.2	35109.7	36379.8	35542.6	42044.6	37424.5	36449.2	36284.7	33860.5	24683.7	29902.6	37435.8	26749.1	28556.2	35791.8	29247.4	32513.9	26514.2	31995.6	26890.7	23543.4	31468.3	27774	26772.9	26812.5	36071.9	38104.1	37357.4	34729	25278	28352.2	27325	25445.8	32574.4	28815.2	31473.1	32081.4	28464.1	34235.2	34818.2	37017.4	33200.2	37596.8	32613.4
POS	M132T240	132.049	240.252	2252.53	3106.97	3372.18	141214	124337	84353.5	3767.36	4812.38	2115.27	7098.32	1678.94	2811.87	3969.86	1921.91	107982	122192	146267	2352.75	1976.74	1978.87	120370	96603.3	2044.96	4340.91	251516	106432	3269.81	2164.56	1029.74	83793	328793	2537.83	4170.39	216963	130403	3348.09	6020.63	4162.74	3302.88	145637	3750.9	121826	108004	3381.08	162104	1798.95
POS	M132T360	132.052	360.481	3273.09	4021.7	20245.2	3787.99	19074.8	2944.29	15021.3	1659.43	12900.8	7199.43	12962.7	3043.99	18234.6	9269.42	12674.3	1979.62	2903.28	12080.2	16379	12441.5	11360.3	3933.34	14469.6	13906.8	3010.31	14074.1	3519.4	2271.15	3970.81	15215.3	7166.46	17849.7	5015.15	4577.29	8172.81	12948.5	3873.94	18543	17261.8	8807.32	14774	3871.47	2087.87	15637.9	2980.94	10790.9
POS	M132T209	132.052	208.826	1489.48	513.852	2291.88	2347.77	1046.29	1484.25	1639.8	1231.18	749.818	1955.65	2410.78	1429.03	1473.39	2304.18	1520.89	1364.15	1688.12	1664.89	1532.12	1048	494.509	1177.54	1127.98	2307.15	1390.93	1028.96	1013.36	2179.89	1658.48	2093.15	1772.01	1432.44	925.15	1456.69	1841.73	1569.89	1443.48	1239.49	745.933	1541.14	2311.42	869.795	1607.95	1810.76	2105.65	601.72
POS	M132T399	132.063	398.654	127924	65515.3	100022	203448	108386	126475	102982	107744	120682	102443	116201	111208	106876	120329	114673	107707	103747	112382	116796	116655	101399	90171.3	114141	109857	107544	139962	106324	112992	128183	123509	99580.5	118127	69909.5	113477	111254	118378	123441	120682	102265	112125	107963	105734	221171	106188	103457	127325
POS	M132T430	132.063	429.783	459415	318658	386999	413463	356339	483150	422949	347678	363211	262431	885024	649703	498642	468427	837548	920021	375814	540864	470745	634444	540819	473295	551415	605846	508061	309541	629494	598080	511849	593902	487318	430589	278075	441429	890317	619928	589109	571246	881556	536429	932841	440351	596076	607564	458511	494124
POS	M132T26_1	132.059	25.636	3239.63	1499.37	4911.39	2295.57	1887.08	2379.97	4335.2	3603.16	2199.32	5746.31	2017.32	1161.95	3739.52	3365.09	4047.73	731.422	2482.07	2582.26	2066.61	2803.2	1386.63	1532.88	1953.16	3649.4	2164.05	1675.61	3453.65	4349.6	3291.46	3261.13	2009.03	1031.08	3101.5	2156.75	761.744	4765.99	2522.98	2606.69	2375.42	4333.27	4483.3	1710.66	4632.84	2924.09	3375.58	1229.92
POS	M132T144	132.063	143.766	8960.16	5771.18	8002.58	8698.75	12321.6	10645	9476.77	11079.5	8902.43	13842.8	8354.33	5791.34	9133.61	10820.8	10710.7	8472.93	11327.1	8931.07	9426.35	7936.89	10242.3	11018	7627.23	15971.3	6427.88	9363.46	8214.61	4222.79	8447.62	7530.39	7146.29	9885.16	7541.8	8124.13	9660.82	9413.51	10103.9	8261.2	9200.83	8785.43	10359	11510.7	8885.49	10271.8	6995.14	11139.7
POS	M132T330_2	132.075	330.104	1.63926e+06	5.77636e+06	2.06076e+06	2.29747e+06	2.6746e+06	1.31008e+06	1.71061e+06	2.17247e+06	1.97072e+06	2.17977e+06	1.35773e+06	1.50376e+06	2.62461e+06	1.81793e+06	1.58052e+06	2.38256e+06	1.75491e+06	1.45595e+06	1.83604e+06	1.38466e+06	1.50446e+06	1.81553e+06	2.00711e+06	1.48439e+06	1.78287e+06	1.17079e+06	1.08799e+06	1.54255e+06	1.85879e+06	1.80435e+06	1.53613e+06	1.39763e+06	6.27288e+06	1.5104e+06	1.31102e+06	1.75363e+06	769955	1.60291e+06	2.06305e+06	862579	2.02791e+06	1.78172e+06	1.64197e+06	1.69733e+06	2.22918e+06	1.80422e+06
POS	M132T239	132.079	239.293	86368.6	83857.2	89721.4	95564.1	90348.1	77544.5	77475.5	95906.2	85734.8	67885.6	97586.1	93692	104266	93146.5	83502.3	96595.1	81199.6	75871.2	84319.4	82038.3	89537.9	71687.6	76188	77393.5	89033.6	80286.8	75055.8	86389.7	89683	81161.6	89086.2	85666.9	103444	79931.9	86049.3	98016.7	78842.4	85722.3	82744.6	96603.9	114081	79568.5	89205.8	102718	87041.1	100464
POS	M132T26_2	132.095	25.668	5198.26	2852.74	7000	3567.77	4730.89	3974.02	5322.53	3213.32	3205.44	6391.91	3065.2	3520.83	3900.17	6396.29	4378.28	5721.55	3625.37	4484.03	3671.67	3262.43	3274.11	2946.82	4793.72	4955.06	3096.83	3059.01	4234.3	2848.74	3082.38	4677.92	3816.82	2797.35	2674.09	2579.65	2792.44	4758.02	4428.99	4802.97	4483.06	5330.36	3944.21	2713.15	4703.29	4376.41	5687.63	3623.38
POS	M132T248_2	132.1	248.136	947448	642821	1.32431e+06	1.23142e+06	1.09543e+06	968227	870596	943775	663832	792008	1.05829e+06	1.05356e+06	1.27148e+06	841713	768690	1.28474e+06	695777	727177	992835	704282	897450	650879	886532	805819	1.01988e+06	733248	804390	1.03223e+06	959010	835546	940336	932615	1.19286e+06	805292	806657	1.04681e+06	816113	814736	969805	867501	1.17048e+06	896892	1.17607e+06	1.03364e+06	1.082e+06	949037
POS	M132T296	132.1	296.361	80275.1	61593.3	239507	79321	146665	187756	83841.7	174779	89572.4	44521.2	116564	106098	213835	80690.1	81618.7	83051.7	87362.7	83175.3	111614	78422.7	82462.9	64362.1	73090.9	83450.2	81337	88421.6	81139	109188	82145.4	84969.1	94693.1	92102.5	40877.8	65614.4	84233.6	84352.6	82577.8	73617.3	85473.2	80373.6	133023	95109.6	138529	156488	97395.1	48232.6
POS	M132T46	132.099	46.37	4334.42	5674.41	7295.37	6284.95	7233.51	8626.83	6774.82	6866.03	2390.25	5474.1	6635.59	4157	7668.87	8739.49	8051.98	4137.99	7960.41	6797.28	9790.1	6731.56	7599.23	6865.54	3820.89	7005.64	7401.29	10747.7	12335.2	4464.78	7949.37	15909.1	5294.96	4987.82	7063.52	7238.82	6141.59	8659.89	7773.21	3716.07	4204.83	9138.81	4274.73	3948.26	4604.52	2706	6435.9	4369.76
POS	M132T24	132.117	24.151	780.454	1066.15	6346.09	3070.29	4326.47	925.205	4891.97	3679.64	1080.62	1620.27	1151.54	1164.62	1417.6	5759.95	4045.16	5127.11	1307.35	3950.42	1287.22	950.402	1198.35	1101.72	1022.41	3824.52	3381.21	1662.3	1103.16	5030.62	922.611	974.582	1184.68	1183.76	986.303	1275	2644.55	4167.46	1414.08	1093.74	1118.44	1226.31	902.653	1255.85	955.903	980.204	750.22	1101.75
POS	M133T330_1	132.676	329.824	712.097	1025.13	781.011	883.748	823.603	542.192	715.325	957.733	764.84	676.273	452.989	491.481	1131.41	639.144	737.997	950.476	749.596	552.298	713.545	673.46	420.242	573.033	715.709	610.89	542.433	501.07	573.291	590.521	517.295	596.923	477.248	366.828	1782.23	512.984	517.527	708.764	353.502	471.617	785.237	375.53	539.33	690.436	543.22	671.147	985.726	588.399
POS	M133T390	132.902	390.175	776.348	889.677	753.375	1096.49	974.44	834.515	1199.32	1057.06	911.052	681.384	1014.99	743.333	1118.86	1112.8	967.371	743.39	990.334	958.608	704.863	1033.81	878.667	1121.89	1169.6	943.665	785.33	614.013	948.811	857.532	803.189	906.439	873.771	917.844	970.231	1033.75	974.471	969.401	718.48	933.053	766.969	985.876	866.924	997.556	1061.72	1073.65	1000.61	871.475
POS	M133T351	132.985	350.911	1098.73	1116.48	1260.94	1250.06	3224.99	848.688	1068.23	1049.92	1210.49	1083.94	729.811	1240.38	1564.39	833.69	566.548	1198.96	1118.78	1149.08	3372.37	1438.78	1687.44	1252.68	360.808	2884.01	1025.17	1260.15	998.59	2289.63	967.572	1058.66	915.933	1215.21	1145.95	897.98	1217.26	1789.55	574.844	958.619	1137.72	1374.18	1856.31	1115.7	843.021	1361.39	992.676	858.391
POS	M133T267	133.03	266.532	85042.2	74568.8	86139.2	101143	122572	74786.2	68069.5	90343.8	64626.9	76751.9	112500	125391	143157	123794	77634.3	142329	63721.8	57720.4	91041.8	88207.7	76431.7	72662.5	107012	71362.9	120423	58956.7	81497	94372.6	115855	80174.7	104830	131158	105633	68183.6	73078.1	136791	78791.7	100567	84931.4	85044.8	104438	82968.3	114277	102240	103307	80275.8
POS	M133T225	133.041	224.504	1178.3	855.026	992.893	722.927	844.907	608.817	791.929	1161.44	964.824	927.395	1438.4	1016.33	957.717	1091.31	779.361	1114.38	828.074	662.683	948.31	1050.24	981.054	1110.19	1093.48	795.375	1078.15	880.156	902.008	811.871	1396.14	1052.45	1698.16	953.636	1078.63	767.753	898.405	1008.22	859.675	1086.36	888.823	752.482	918.525	670.926	1022.46	929.825	1052.29	1068.59
POS	M133T156	133.047	156.176	6739.33	7636.22	3747.28	7342.44	8509.2	6075.66	7342	7648.06	8393.82	7758.99	2790.49	6095.18	9304.97	6038.32	4898.33	3643.01	6379.36	7658.46	8084.02	3198.5	6491.3	6171.99	4589.19	5674.43	5202.65	6890.32	6156.29	8861.59	5170.09	7938.66	3448.48	6810.34	6230.3	5626.39	6220.4	4925.51	5082.8	6751.75	6720.71	6655.39	8194.89	6662.91	5705.9	6676.57	6238	5305.55
POS	M133T360	133.058	359.777	20745.2	21399.1	16253.5	17814.3	16711.8	14884.1	16554.7	16746.9	18011	12098.4	19680.5	19940.7	19656.3	15349.2	15456.3	21079.2	15547.4	15412.4	16224.5	16447.1	12682.5	16404.6	14969.7	15569.7	19061.6	11138.4	15249.9	11752.2	15667.4	13368.4	15423.5	15919.4	17726.1	13608.2	15504.9	18407.9	17028.4	18921.2	16306.6	17793.1	19542.7	20003.5	17472.2	18632.7	17015.3	13744.1
POS	M133T382	133.058	381.967	11211	7873.54	20206.4	8148.91	23236	13854	11961.2	18319.8	27119.9	9584.69	11947.4	17855.7	15009.6	9144.75	21139	12810.8	17070.3	19950.2	13707.6	12982.4	8404.64	7545.27	8193.38	13110.8	11846.4	10949.6	13671.2	9726.66	11123.5	8584.78	10720.9	24402.6	6657.49	9523.83	11166.4	13497.7	12179.3	10335.2	11020.7	12042.1	13921.4	15080.9	12655.2	15378.7	10654.8	6728.98
POS	M133T430	133.066	429.793	20378.3	6845.69	12903.9	21693.1	16039.7	23707.4	16000.6	14992.4	19927.9	23889	21531.7	32030.8	42930.5	22812.4	24584	25440.8	18778.9	19483.6	21743.8	33466	43338.2	22028.7	26603.3	25592.1	25096	14027	41586.8	32692.7	20923.3	33311.2	25583.2	22642.9	13611.4	21089.4	28300.7	29987.6	38985.1	24017.2	23933	25126.2	27864.6	34069.1	31353.2	31076.7	15968.2	24690.3
POS	M133T25	133.067	24.586	31143.1	7946.77	9287.94	19938.9	19819.9	20580.8	35527.4	22463.6	7057.59	49262.7	30507.9	12817.8	10639.3	33459.3	10625.7	7826.27	27508	31229.4	23598.7	5953.02	20139.3	15438.4	14217.4	37674.5	19204.7	14765.7	10801.7	38835.7	32738.6	30159.3	26969	11931.3	10604.9	24206.8	9572.52	8153.46	21041.8	29168.9	20788.4	20440.4	22929.5	24386.1	38198.2	30090.7	25303.1	14679.8
POS	M133T330_2	133.078	329.887	61854.3	213593	82612.7	90178.2	103081	51457.6	69278.7	88226.9	75333.2	84083.7	56762.4	57184.2	109286	71994.4	62237.6	90723.7	70527.7	54538.6	70484.4	54659.8	61174.1	74221.4	78466.7	58858.6	76690.1	45890.3	42238	62389.8	72071.6	70606.7	60679.9	55466.5	238057	61411.8	51911.9	69338.6	31737.3	63128.7	84511.4	35208	76066.4	72776.4	63746.5	66234.6	88232.5	71845.9
POS	M133T650	133.074	649.829	345.847	298.71	251.636	336.99	254.519	326.907	240.797	292.118	234.866	327.375	295.52	365.408	344.859	345.268	386.104	232.141	344.184	329.467	321.825	231.338	247.251	284.173	228.956	265.433	182.284	315.372	231.379	261.21	384.925	327.582	297.968	229.625	346.91	342.451	140.462	319.237	330.282	329.945	285.123	289.98	338.433	322.264	285.61	241.359	308.096	247.38
POS	M133T239	133.082	239.286	11787.3	35251.1	11000.2	20306.6	12129.9	9983.18	16574.6	12210.5	10673.2	9293.56	10615	12633.1	15708.3	10246.3	10422.6	13312.9	10896.2	10224.9	17951.9	9703.4	10630.2	9358.32	9303.57	9070.54	15193.9	8669.19	7554.3	9701.07	9892.52	9810.65	10330.2	26722.2	10608.5	11389.5	11095.6	23976.5	23298.6	10364.8	10472.3	10677.7	12505.3	10727	12475.6	12043.1	11372.3	12283.4
POS	M133T64	133.083	64.401	78839	957016	40336	72042.9	39858.2	55371.3	42082.5	84586.6	38120.6	66140.4	42508.1	78392	22722	67293.1	53621.5	80215	56356.3	108095	28863	61282.8	31201.7	24801.3	30471.6	33596.1	25016.6	22061.6	34590.2	21880.3	25363.7	20299.8	28099.8	55510	23782	111470	42372.3	82562.5	61576.5	30065.8	42467.4	32451.5	34165.5	92263.8	50538.9	23358.4	47803.3	25912.9
POS	M133T46	133.083	45.899	24730.6	29965.6	43470.1	22515.8	64436.8	12986.9	27393.7	28544.3	41033.4	17959.1	11418.9	41631.2	51225.8	44929.4	49829.9	43580.4	32800	1875.61	8843.88	14771.1	5365.39	8759.85	14617.1	7657.58	9840.06	2265.63	6656.07	5914.61	14048.2	8534.89	15010.6	56977.7	12580.8	38410.7	18261.6	44925.3	39241.6	14225.4	34369	14946	16327.3	39378.8	34802.1	4290.37	27880	6380.57
POS	M133T491	133.095	491.494	22830.8	39702.9	31459.7	25200.5	23906.4	30063.2	24328.3	19302.9	26168	16796.8	23738	21884.3	34587.5	42680.9	25864.9	39314.2	22582.8	22864.5	18469.5	24536.7	18698.9	19829.6	24245.5	22883.6	22127	12058.4	21180.2	19202.4	23274.8	20747.5	25865.4	21715	34555.1	24488.4	26661.2	35071.2	15961.1	27948.9	24373.7	24960.9	34568.7	20539.1	27962.5	24676.7	23980.9	28105.3
POS	M133T372	133.095	372.315	4273.15	4979.04	6450.56	5231.48	2822.35	4428.73	6667.44	4504.89	5435.99	8090.44	7494.81	5100.77	8411.13	6138.14	3412.1	3208.78	4062.58	7409.73	7422.22	3904.04	4130.75	4029.29	5142.62	5981.99	4973.68	5873.49	6282.14	5673.92	5474.18	3283.21	3446.82	8626.78	2465.17	3083.74	3354.95	6520.93	7762.34	3921.46	4720.78	6942.54	4088.72	8136.5	3510.83	7966.67	4800.25	4258.18
POS	M133T45	133.099	44.992	36812.9	2735.07	30295.2	12292	27807.9	31817	33548.6	8865.71	10377.3	10856	23033.5	5068.22	56336.6	52944.8	47333	9428.93	12764.4	9689.93	10090.5	13784.8	13271.8	15161.4	16926.6	19402.5	21715.6	11094.7	17314.7	11671.1	18489.4	16131.8	12561.3	52864.9	15064.8	7484.29	12461.7	11224.7	10821.2	10690.5	6458.52	40135	11234.1	43875	12358.7	11354.9	13282	7295.77
POS	M133T296	133.103	296.362	6052.29	5600.61	15865.4	5373.42	9504.83	12459.9	1599.48	12278.7	6114.08	2896.04	7281.57	6960.33	15263.8	5600.29	6885.36	5275.89	6015.43	6349.07	8649.64	4712.87	5841.26	4987.51	5244.69	6130.26	4730.72	5401.56	5962.01	8298.97	5600.67	5902.98	7107.87	6695.14	4001.6	4880.01	5089.82	5904.03	5095.58	4354.59	6112.66	6082.03	8200.67	6998.44	9602.63	10302.3	6468.39	4713.37
POS	M133T248	133.103	248.005	67665.2	42671.6	84658.9	78175.6	70404.1	64750.1	57167.3	58293.1	43321.4	52975.7	66015.8	64232.2	79390.7	59365	51842.2	88610.6	44586.4	46041.9	60995.7	49007.7	60157.2	40753	58551.3	52670.4	64939.7	47395.7	56343.6	68051.5	24391.1	53937.4	61587.7	61782.2	77794.9	50036	52493.7	71603.5	55263.1	55807.3	60553.6	55235.3	74235.5	56969.8	78930.7	65471.1	69393.9	60265.6
POS	M133T28	133.116	28.0625	274.263	8281.56	962.125	1189.83	684.034	11715	1161.12	951.202	885.552	489.052	943.215	454.62	444.437	1523.14	7849.54	3475.87	503.714	1038.51	1002.48	1227.64	426.882	619.399	345.038	15693.4	9805.24	7007.51	425.619	15585.9	223.971	667.628	10608.1	350.6	632.587	424.743	579.887	558.885	882.703	881.311	422.911	1297.07	683.306	12053.1	752.194	412.598	536.343	756.491
POS	M134T28	133.975	28.1895	1595.23	459.734	563.156	633.031	51.56	1084.56	867.439	1495.43	1780.22	1834.98	191.488	389.851	437.489	347.317	57.586	75.1996	69.9596	116.114	123.466	0	60.9462	36.2373	83.5324	495.705	108.891	661.768	149.556	12.8937	73.3219	78.0295	58.7504	262.338	66.812	4125.63	1149.58	95.9227	1148.45	342.98	113.428	87.6987	864.216	3807.12	1106.32	1547.14	1740.86	1869.52
POS	M134T217	134.024	216.639	14544.2	21470.9	26928.1	35756.4	28638.3	46889.2	20830.9	19813	10068.3	15072.4	21128.3	32298.1	30299.9	44799	33419.4	25300.5	19531.8	22650.9	21476.1	27238.3	24567.4	24477.5	21683.7	23032.5	39402.6	18283.2	30358	19421.7	31470.9	16977.9	17022.9	22097.9	25759.4	19545.7	37973.3	26690.6	17709.7	21334.6	23903.9	34414.2	22864.3	31813.1	20934.9	26988.1	17175.9	33477.4
POS	M134T349	134.016	349.089	1191.78	1763.02	1708.59	1312.2	2534.71	2512.57	1469.82	1756.94	1148.49	1049.72	1598.44	1508.33	2950.2	1817.17	1509.93	1737.09	2005.45	1507.46	1247.76	1600.98	1807.56	1149.13	1886.94	2207.51	1883.48	2073.73	2046.77	1845.89	1676.7	1718.56	1682.56	1365.47	1640.36	1584.16	2327.52	1759.49	2362.36	1847.79	1122.78	1111.11	2036.79	1458.88	1604.64	2268.66	1037.53	1248.5
POS	M134T267	134.032	266.615	5374.89	4838.55	4579.18	6529.27	7480.19	4577.78	4826.8	5831.01	3817.71	4426.89	6719.59	7798	7419.64	7493.88	4738.97	9046.4	3426.48	4227.61	5880.11	5223.31	4811.45	4160.14	6461.54	4308.56	8725	3581.46	5643.03	5541.28	7047	5116.43	6638.63	8143.74	6403.11	3772.12	4409.36	8040.38	5068.14	7563.29	4401.33	5495.72	6357.79	4381.59	7142.02	5419.22	5893.83	5353.57
POS	M134T430	134.042	429.793	19213.1	17320.8	15376.9	47358.2	26486.7	29151.4	25642.7	16019.9	30804.4	13592.5	33614.5	27809.3	19753.5	46243.5	37493.6	19316.6	18946.2	23235.9	24368.4	20653.6	22800.5	35976.8	21059.3	29263.1	21278.6	9854.54	20157.3	25752.4	22736.3	20525.6	39416	21131.6	13545.7	17547.3	35456.8	26639.2	19522.8	19396.7	32674.6	57105.9	19877	56261	65279.2	23820.4	16462	26334.2
POS	M134T41	134.069	40.514	11349.9	5927.58	8209.41	8197.81	10752.4	8957.92	6317.45	4939.27	8840.38	3989.88	973.022	3923.53	8396.27	6754.73	6615.92	7807.49	6509.25	6444.53	5624.59	5568.48	6744.14	6001.41	13212.3	11145.6	1438.4	3861.17	5707.46	6311.97	7308.25	4952.2	5446.88	6965.35	6344.07	14193.3	14068.5	3009.51	8785.27	6657.47	6462.68	6418.66	11217.9	15082.1	10512.6	12473.6	13852.8	11447.6
POS	M134T26	134.075	26.326	56234.5	23184	66649.1	36955.5	36660.9	35436.4	77815.9	28932.3	34783.2	94230.4	36092.6	16540.9	17073.5	56524.5	15698.7	13307.4	36206.7	48071.8	29687	9221.79	27891.6	22781.4	22199.9	73697.7	37860.1	19866.1	13954.8	63281.3	60086.3	50644	33587.4	18649.2	17750.8	33064.1	16405.9	10977.7	28481.1	43193.2	34112.1	39736.7	30703.8	32772	67169.9	34067.5	45538.3	18544.1
POS	M134T330	134.079	330.126	7291.39	26214.2	8756.48	12616.7	13896.1	6707.22	8544.25	10617.8	10349	10618.7	8263.4	1849.78	13863.6	9916.86	7862.93	11401.9	8634.65	8351.08	8530.11	6596.62	7756.81	9482.53	10549.5	6672.77	9556.08	6084.22	6511.88	7031.81	9401.63	8682.2	8282.68	6483.35	28913.2	6933.89	3217.01	9227.72	1522.1	7189.59	10222	4695.93	10316.8	8867.8	8081.71	7329.22	10927.1	10566.5
POS	M134T314	134.079	313.549	9757.18	7018.94	7149.65	6675.09	8862.99	8929.54	8422.28	8080.5	8864.36	6546.19	9716.77	9429.32	8028.45	8914.54	9404.29	8493.72	6771.43	10546.3	6651.14	7527.26	7387.1	6383.15	6971.21	8942.63	8869.05	6796.08	7357.63	6405.02	9407.71	7145.8	7655.98	8402.19	12479.8	8270.95	7720.34	7479	8179.64	8972.61	8187.36	6391.79	13305.8	7818.92	7127.46	13777.5	8531.97	11920.8
POS	M134T65	134.087	64.733	5395.59	35749.4	6483.43	5404.01	5312.45	6821.13	5565.48	6397.35	6464.02	3278.46	6905.03	7666.51	5328.13	8190.6	6284.18	6370	6912.34	8261.58	5070.02	6255.68	6221.82	5514.8	6230.29	6028.33	5041	4368.83	5487.09	5622.05	5730.01	6891.72	6218.57	7284.56	6493.27	5376.4	5580.93	9215.43	6605.67	2624.34	5164.76	5086.73	9137.54	7373.87	9893.53	4957.95	7197.92	5772.9
POS	M134T248	134.104	247.725	37823.6	32366.1	8458.96	6530.12	2474.75	24057.6	28650.6	25799.5	48610.8	36007.7	5567.75	5077.94	5978.54	4007.29	4149.62	6025.22	3632.6	3524.26	5226.7	3819.49	4308.28	3667.59	4620.39	4203.96	4955.17	3727.18	4088.64	5296.82	5122.19	4326.45	4730.59	4408.83	6294.81	4247.78	5547.13	5402.3	3687.82	3826.15	5025.07	4435.77	5608.17	4113.32	5802.3	6567.4	5531.78	4820.8
POS	M134T25	134.111	24.948	6235.55	2639.36	261.478	4543.3	196.018	5395.88	8342.81	3583.21	237.703	136.909	3251.27	1785.9	185.673	6168.7	1902.78	238.891	231.199	207.635	128.225	214.062	272.61	220.183	2909.93	8492.6	169.031	160.903	180.886	133.187	603.321	234.521	177.154	122.833	2062.53	198.273	241.88	258.292	150.857	340.775	3457.98	217.562	344.243	199.764	238.222	236.978	205.894	144.456
POS	M135T267	135.025	266.796	4534.72	3848.86	5060.24	4821.5	5691.71	3825.69	3280.46	4191	3032.78	3178.88	5610.67	6948.57	17348.5	5635.53	3434.9	6542.91	2877.13	3295.81	4487.36	3882.54	3872.37	3683.36	4159.1	3680.65	5932.93	2763.91	3990.63	4903.01	5483.39	4087.21	5018.87	6943.41	4578.59	2817.13	3877.61	6271.35	3970.5	4948.95	3924.27	4644.46	5247.71	4724.29	5544.91	5288.85	5174.5	4094.3
POS	M135T216	135.028	216.185	1025.62	1182.11	966.855	2268.96	308.305	2354.17	1224.57	1042.24	858.074	1456.8	1991.86	1719.67	1588.96	2071.03	1814.57	1291.1	1718.66	1471.53	1038.79	1432.37	1389.25	1326.89	1232.48	1075.72	2041.36	1280.35	1510.99	1130.9	1564.1	832.144	1996.43	1287.55	1782.06	1215.28	2065.58	1609.36	1125.71	1020.88	1710.99	1871.27	1157.28	1203.57	1042.65	1784.03	939.953	1869.37
POS	M135T23	135.059	23.478	22431.7	888.634	12623.6	17835.4	30235.7	13343.6	14628.8	27708.4	7791.85	8326.77	8628.68	2943.16	5752.2	8025.62	4775.39	5871.95	1242.18	1450.63	520.683	5073.82	428.129	7197.08	7076.21	9318.76	1184.4	549.916	1199.01	9521.03	934.538	1603.16	695.814	3290.93	9722.94	8431.36	371.884	6859.93	974.134	747.655	1418.73	1906.21	7178.14	830.633	539.937	443.38	544.239	7403.74
POS	M135T199	135.053	198.644	2835.55	1886.22	1250.85	2455.15	2354.05	2397	2275.68	1883.46	2484.58	1419.65	1625.74	2339.05	2790.34	2891.9	2193.33	2540	2179.53	2153.41	2318.46	2281.56	2859.23	1925.24	2198.12	1832.2	2454.48	2031.2	2318.62	2131.96	2335.48	2010.31	1447.73	2410.57	2115.85	2557.07	2168.8	2316.33	2351.5	1181.71	2280.94	2469.11	2293.88	2690.4	1888.25	2199.5	2691.57	2132.8
POS	M135T282	135.065	281.954	1716.16	1320.98	1461.54	1923.79	1728.57	2056.6	1699.66	2103.25	1167.91	1516.57	1883.61	1714.25	2194.03	1750.76	1589.8	1752.97	1436.1	1862.43	1645.81	1796.84	1689.33	1327.35	1603.56	1833.29	1950.99	977.732	1791.84	1665.01	1621.87	1865.79	1653.16	1693.26	2263.48	1897.71	1471.61	2106.62	1666.36	1571.33	1592.39	1754.32	2410.7	1763.73	2059.38	1762.07	1673.53	1868.04
POS	M135T31	135.078	31.411	22212.7	46842.7	36347.2	35815	30833.4	29551.6	24609.4	18521.9	37493.1	37175	3872.51	12935.2	10079.3	6004.41	8462.34	9356.36	4972.35	5161.33	11910.5	8815.25	12194.6	11631.9	12376.6	10141.3	12559.9	4488.33	6088.96	8503.89	10425.5	8221.76	12754.1	7306.26	14669.4	3649.52	16598.2	12701.5	11423.6	5702.86	3063.57	12043.7	11849.8	14188	8381.06	10142.3	12909.1	11614.9
POS	M135T81	135.078	80.722	22222.8	46165.4	35759.7	17079.5	29507.1	31489.4	42758.8	11781.1	46985.6	22899.5	3423.01	6659.86	5408.86	6475.35	6448.19	5687.63	4215.34	3865.84	2718.7	5537.57	4913.5	3224.95	6204.45	6034.38	5334.09	3455.62	6524.71	3949.6	5554.23	4904.77	6569.21	4681.44	3319.92	3851.8	5605.31	7084.88	4056.85	4877.36	1944.83	4940.55	4223.91	4776.77	7475.31	5409.98	5930.58	4903.95
POS	M135T52	135.078	52.094	187368	342679	301565	187176	245332	243185	250653	104742	356779	206777	12643.3	13428.4	13739	10075.8	6801.43	14614	8365.81	8415.24	9066.37	7110.41	8563	15046.7	9989.47	11026.9	9865.71	10122.2	12921.5	7970.01	11716.1	8076.22	10667.1	11341.5	5182.48	482.234	9849.72	12440.6	15024.6	7673.48	5062.75	15193.4	8844.92	8393.4	9054.16	12640.3	11818.5	5799.13
POS	M135T30	135.096	30.05	21161.1	1922.29	2257.36	17815.3	2306.49	15132.6	17947.5	1794.51	1160.14	1146.91	6193.72	4241.76	5806.56	5582.69	3445.24	4699.97	3127.05	2543.89	5529	1855.61	5333.37	4996.3	1707.79	6595.42	1865.96	4871.24	4257.19	2595.25	772.193	1787.06	5449.59	4914.09	4340.18	2162.66	4730.88	4431.75	4762.75	898.94	2248.13	2180.22	4914.14	5518.27	6852.54	5645.06	1001.88	869.384
POS	M135T45	135.114	44.5745	14809.6	115419	11646.5	12912	18138.6	119468	16497.3	11790.8	119878	17216.7	13968.8	11944.4	22023.4	12317.4	12496	12123.5	14813.1	11735.8	16412.8	14160.1	12387.8	11538.3	12612.3	10343.2	16858.2	11965.1	15112.2	10743	11071.2	11759	13054.8	15014	8609.21	13902.3	12753.8	12186.4	9848.68	16587.3	10633.1	13815.9	11038.4	10814.9	31101.6	18184.8	17565.1	13883.1
POS	M135T237	135.118	237.394	3065.93	1525.02	2746.26	1219.41	1646.38	2219.98	651.731	2030.54	6368.67	1807.86	1343.35	1195.52	15570.8	1303.89	2151.15	1757.54	1374.16	1842.72	1293.97	1246.28	1331.65	1178.29	1371.87	1349.25	1243.08	1166.67	1358.61	1187.92	1523.47	1463.73	1392.33	1446.79	1176.43	1229.96	1485.79	1484.08	1479.22	1106.77	1424.71	1566.13	1510.4	1199.41	1829.28	1400.33	1274.56	1214.67
POS	M135T28	135.132	27.856	641.554	843.352	1317.25	1125.08	1201.67	640.487	973.894	1273.89	775.899	914.037	1336.68	614.927	845.325	1221.72	2693.43	1125.79	1173.3	6438.79	1022.27	892.074	1196.58	1116.95	835.634	6689.89	964.944	685.376	587.063	7043.26	671.543	801.928	6478.21	585.058	837.737	1589.58	577.119	812.552	771.148	1133.17	926.271	1229.37	1510.39	586.445	673.581	907.929	835.859	900.999
POS	M136T283	135.664	282.71	1352.76	1428.13	1149.75	1657.42	1233.14	1469.16	1165.56	1387.02	1148.08	986.289	924.189	719.921	2222	897.435	973.755	1643.14	1537.97	1168.06	1615.8	802.84	639.793	551.119	1188.05	1530.68	709.227	1230.18	1652.24	1338.92	1258.38	564.562	946.064	1795.61	1813.83	829.15	1167.44	1050.55	1144.76	1304.95	1528.79	381.842	1636.14	1401.54	1682.31	1204.33	1087.52	860.114
POS	M136T617	136.019	617.24	298878	605694	512103	587773	351406	697995	592497	192480	490340	847418	643536	305530	640985	733446	626735	879159	584415	705469	591545	526926	617527	533140	529977	635905	357588	474933	733478	518630	433957	646130	751662	630833	676444	519353	430580	970291	229862	586118	759657	262162	608329	790934	709300	634237	332682	505907
POS	M136T15	136.019	15.2325	48121.4	15004.2	47906	48744.3	48238.7	47934.6	46394.8	34662.2	45585.5	29778.8	46901.2	42876.7	44166.8	47698	43926.9	30766.6	48695.3	46452.5	51164.7	45041.8	73619.7	47023.2	44432.9	44606.6	41602.2	41864.3	46911.4	45669.4	43882.6	43017.3	44951.1	46601.5	47988	40893.8	29616.6	49576	43686.3	45803.3	44623.1	77568.3	26589.8	53586.3	49578.2	48589.4	18179.3	44985.3
POS	M136T3	136.019	2.785	37333.3	21375.7	29692.9	36827.4	43441.5	32847.1	36850.8	46009.7	22260.5	22440.1	34572.9	32592.4	27136.4	38321.5	34167.8	49964	19610.5	22322.4	42890.2	35740.3	21842.2	33146.2	33207.3	33808	16573.8	33300.7	27207.9	53632.4	33151.9	33753.1	37485.7	29612.1	52150.5	43566.3	35433.1	21554	37356.8	41490.1	35245.2	31470.8	24458.4	19975.9	37650.2	39169.5	26983.5	49640.2
POS	M136T91	136.037	91.4455	51404.6	96605.1	78772.3	134295	124739	210039	83041.2	94498.8	169479	128482	175699	176251	149112	45656.6	58040.9	130452	133362	121325	86618.3	41554.9	60635.6	44761.4	189220	92640	54748.7	136499	62773.6	84658.9	86775.1	91779.4	158607	163528	88874.5	79492.1	43990	60571.2	115039	81291.4	79692.2	47046.2	126103	44459.7	164650	87335.7	135776	66391.5
POS	M136T279	136.04	279.388	2889.55	3590.02	1067.88	4357.13	3034.88	2475.12	3406.43	2897.97	1826.59	793.147	3502.95	3927.98	4559.34	4798.76	1938.2	2615.38	3056.78	3627.68	1637.89	5456.68	3130.1	3527.37	2763.87	4777.41	2512.19	1484.99	1872.18	1647.24	2200.35	1158.04	2222.71	3210.56	4065.07	4399.85	2667.36	2713.8	2564.48	4090.87	3107.11	1497.53	1528.16	4469.65	4468.56	4138.66	1229.12	3831.84
POS	M136T24	136.037	24.027	20632	18199.9	23872.2	22283.2	19745.5	24389.2	22070.2	23479.3	26066.2	21707.8	23614.4	20004.2	22285.9	25305.4	26933.5	23805.1	24223.4	23631.7	21464.9	21952.7	20401.9	21199.5	21742.7	22793.6	23470.4	21154.6	18624.4	24590.3	24048.4	22454.4	25404.7	18950.4	24057.2	19793.5	22199.3	21221	25189.6	22202.3	24525.6	24323.7	21381	19632.9	20779.5	22086.8	19145.6	22704
POS	M136T324	136.04	323.725	4597.42	1320.08	1799.95	5613.23	2806.01	5443.56	5204.35	2171.22	2591.95	4548.64	1652.44	4496.72	1469.91	4877.86	2325.13	5344.14	2157.14	4602.7	4781.65	5112.86	5290.96	5162.69	4571.39	4952.52	4542.85	4355.19	4583.09	5148.21	5407.79	4747.75	1786.14	4777.82	5446.8	5690.88	5058.11	4533.81	4050.62	5180.93	4939.78	4467.07	5146.37	4992.34	4632.37	5218.96	5053.53	5243.31
POS	M136T162	136.046	161.53	29445.6	21865.5	18457.9	19162.3	26377.7	25078.8	23901.4	23141.9	26963.1	23590	21529.9	19795.5	33260.2	22828	26720.1	20225.5	22137.6	29849.4	24270.8	22592.7	25524.6	16907.5	18558.1	31778.1	29530.9	22774.5	28974.9	35792.2	24502	27868.8	20257.4	27707.7	22157.8	23527.4	18688.4	23005.2	32087.6	25772.5	15749	36783.1	22316.2	33203.1	23963	28362.5	34458.8	26071.8
POS	M136T152	136.059	151.964	32051.1	28006.6	50053.4	34820.9	50099.8	30834.7	31723.8	81459.7	50323.1	46534.1	45961	40915.3	41292.6	36894.2	53562.3	39452.4	44782.3	37918.4	34723.2	34541.2	35132.7	38333.4	54776.8	40840	40307.7	49318.3	27500.4	144743	40012.2	76249.6	48764.8	28803.9	47087.6	80026.4	67279	42144.9	57882.7	39814.3	35660.6	34963.2	61718.3	33839.2	45517	46065.8	37264.8	33294.1
POS	M136T282	136.073	282.265	478302	446466	465455	459058	541901	597069	451207	480928	426587	459967	459443	488047	719336	469464	387426	469988	506796	476520	521722	466303	462010	429855	460051	469763	459021	474400	459770	457567	470122	441972	455617	522314	510663	459316	411517	494453	503054	472378	479062	493325	645828	477172	465853	479951	445023	452831
POS	M136T209	136.073	209.048	22895.1	11341.2	21443.5	25972.2	15223.7	10851	22024.7	21317.7	11599.8	39151.1	21282.3	10454.5	9809.78	20250.2	8494.28	8780.42	25931.7	21044.9	25140.9	8283.68	8996.63	8474.21	10081.4	54420.1	21001.3	361.946	8450.45	32739	26143.6	27682	17788.7	11679.2	12505	22372.2	10448.3	8205.88	21675.3	19304.4	14121.4	15385.3	24152.6	13996.5	26623.9	17970.4	29814.6	13947.5
POS	M136T25_1	136.077	25.205	5799.95	7325.21	10674.6	8059.86	12059.2	9988.16	8240.28	6448.51	9055.82	10418.8	6186.95	8429.43	9743.82	8043.59	9867.94	9822.09	9327.6	8969.13	9082.12	8610.61	8461	5581.39	9516.26	9375.6	6589.54	9568.43	9420.77	8476.11	4590.24	10624.5	9915.61	7024.51	8769.23	7846.7	8385.77	10174.4	10053.1	9006.79	12598.8	8639.59	6621.07	8107.88	5114.95	6650.26	8013.59	8467.52
POS	M136T45	136.084	45.3315	15364	23515.4	23755.7	16294.3	16352.7	17943.7	16658.4	7717.93	6610.93	14278.9	3135.1	13555.9	6748.51	5222.42	15797.2	13773.9	15220	15227.9	10831.3	11660.5	12732.7	10630.2	15100.7	9096.49	11489.3	4945.68	15853.8	12463.9	3888.29	21752.9	14188.6	1473.06	17511	11981.5	10261.3	1155.25	5424.75	6109.93	1200.8	13557.3	8226.88	9570.21	8538.24	7748.07	11746.4	12740.3
POS	M136T141	136.084	141.17	6266.79	7190.12	7642.82	1261.28	682.824	6707.11	6965.58	7296.94	6259.95	7641.39	8528.17	7138.58	7368.08	7039.4	6770.78	6634.19	6899.96	7761.6	7800.38	6773.48	2559.29	6547.84	7012.64	25588.7	5461.12	6982.34	857.609	9587.58	6107.61	9466.99	7439.03	7160.81	7807.91	7812.64	5952.42	7479.76	1268.47	7010.76	7443.3	7073.48	9257.07	6681.92	6936.81	9675.89	6653.77	6675.05
POS	M136T25_2	136.091	24.972	1897.56	2223.52	8965.58	1750.46	1515.41	2334.97	8467.53	2024.57	2570.2	9018.89	1917.56	2539.37	1722.87	7530.61	3527.74	10038.9	2270.1	2578.22	7357.2	3072.8	7831.91	5207.26	2126.15	2258.13	2898.73	1486.3	9036.9	7099.44	6570.18	10374.5	9055.49	2362.94	2160.41	2144.15	2752.67	2782.1	2751.55	9116.18	3120	7664.94	2326.53	1660.01	7738.46	2528.36	9224.43	2708.68
POS	M136T714	136.109	713.927	6846.44	6946.94	7600.62	9288.76	5686.03	3640.83	6160.02	6526.59	5922.2	2144.43	6831.9	6095.93	6117.43	5791.96	4956.94	5594.09	7187.3	6629.88	6723.13	7997.94	7938.89	6822.5	6848.05	5595.6	7955.8	5070.11	3001.24	5464.88	5689.94	6536.65	7647.17	3752.33	4107.06	6603.5	8194.03	5252.12	6722.36	6847.66	9404.61	6613.53	6678.52	6759.29	5644.08	6788.09	5215.18	4190.77
POS	M136T26	136.127	25.641	5569.46	6068	7529.93	5798.18	5162.19	4113.74	7763.18	6420.18	7088.77	10477.2	9195.24	5850.08	5271.05	7529.15	8327.79	6486.11	5182.17	7577.42	5502.96	6946.5	6574.54	5424.68	6477.39	5225.13	6299.53	4300.63	4541.55	6638.49	6869.24	6633.42	9156.3	3874.62	7247.83	6059.04	7059.48	7544.13	4674.27	6219.74	7294.76	5370.16	7482.1	3989.67	8189.85	7152.6	7307.11	7872.98
POS	M137T161	136.631	160.887	618.875	5411.49	1106.3	559.367	2132.4	556.252	838.869	1519.01	275.262	1376.62	366.637	736.579	215.969	383.21	848.662	1195.74	1037.38	588.734	2051.69	1225.74	919.94	1425.64	568.918	566.706	452.715	1339.03	468.486	2028.08	737.576	1422.15	308.235	552.358	4863.74	1328.81	740.77	1452.46	601.476	1278.57	388.878	1333.32	1960.55	582.725	1342.37	1211.77	755.514	677.505
POS	M137T332	136.938	332.315	94681.1	7298.21	51124.2	69944.9	67679.9	86501.6	60807.8	51663.4	45310.7	51680.9	74376.5	102425	98279.6	82449.4	80415.9	85556.2	74658.5	69126.3	83467.7	78619.1	71040.3	50506.8	73178.3	96935.3	69586.4	93066.9	103547	107982	68742.3	91141.3	54715.2	109932	8313.7	56028.5	78444.2	118786	158903	76656.6	70857	111530	99192.4	79351.3	120821	96711.2	68933.5	64868.2
POS	M137T616	137.022	615.885	8921.82	17550.4	25368.2	15471.9	17656.1	26055.5	19334.1	17326.3	15597.4	4671.01	18346.5	11645.7	13730.1	18629.5	23020	22342.4	11761.3	11631.2	12550	17729.5	29065.7	28691.7	15447.2	12286.4	18395.2	15697.8	13875.4	17190.2	37289.2	15638.1	36212.7	9941.51	34625.4	10452.4	20812.4	8551.58	11673.2	17218.4	29845.5	28682.9	19014.6	12130.6	34304.2	4884.83	32614.9	22457.5
POS	M137T162	137.044	161.506	199470	2.24516e+06	274639	318773	749985	317188	280012	569606	272406	549152	194898	241072	242727	343727	349025	482902	391300	276742	776320	459709	311158	376265	472244	268563	276536	420990	254224	646379	306704	523302	294683	310973	2.26067e+06	431810	456185	500422	328737	324083	319842	420000	623011	313077	454302	311796	373194	242367
POS	M137T209	137.044	208.749	19986.8	123709	26719.7	21159.1	49531.8	38751	12890.9	130645	25136.1	82283.4	14935.4	29730	27997.5	24738.2	38567.8	41956.4	40948.9	36689.7	40515.4	25079	20141.7	33097	20105.4	17859.2	18150.4	75643.9	28681.4	148176	13824.4	76520.7	28566	79878.3	515034	43937.4	53291.9	24214.6	51971	18807.9	15840.1	34276.6	114912	40049.5	26855	17743.1	12910.6	17252.9
POS	M137T435	137.043	435.115	15115.3	16378.5	16083.4	8361.08	25716.9	13521.5	8686.44	19235	21930.6	8235.4	24916.8	9984.99	15925.8	19969	48234.9	34641.4	51850.2	16627.5	12753.1	19630.4	15607.3	7110.94	35123.2	16237.2	11832.1	13111.3	9186.54	39006.1	32401.9	21293.2	16899.3	7065.02	10651.5	34137.2	74641.6	30347.1	42406.2	32620.1	15476.3	16032.9	26253.6	12876.9	40739	23300.8	16121.6	23443.8
POS	M137T142	137.043	141.609	25491.1	25536.2	22250.4	40356.7	26264.7	29949	23716.6	30254.4	26275.5	42078.8	16728.1	19163.2	29272	29631.5	28427.8	18129.7	32358.2	32576.5	24402.8	20639.2	25065.4	21719.5	25134	19224.5	19044.9	24433.7	34715.5	23900.4	30673.6	25984.4	16279.3	27859.2	23866.4	24143.2	29197.1	24561.2	29110	23811	22362.5	24244.3	30673.9	25354.7	21152.8	26636	20426.9	21389.8
POS	M137T283_1	137.057	282.648	8872.78	8449.5	12123.5	125685	28609.3	24446.2	7799.22	19471.3	8690.45	30901.1	55527	29925.9	22249.6	14493.1	10993.9	8342.64	23478.8	22371.7	56852.4	10270.5	14349.5	6685.7	13903.3	7025.66	9218.06	103687	27913.8	9070.9	23157.4	15239.1	52770.4	61187.5	22198.2	28758.2	18312.6	10416.8	17522.4	41735.2	11887.2	46072.8	14526	14438.7	15412.9	9737.91	13476.4	44499.7
POS	M137T316	137.068	316.206	223362	197175	132383	227865	145516	187925	150499	224470	176036	295131	227352	324917	286805	131354	117393	181153	175993	228301	148480	136758	149301	362694	318315	166205	100993	376565	215057	458444	187907	171791	203537	340027	170347	240914	109075	142220	157954	265858	150692	148083	187225	477757	338258	276640	288631	156762
POS	M137T26_1	137.061	25.641	2368.39	1797.85	4183.27	17742.3	3051.73	18559	15188.1	16140.1	2695.99	6208.04	13210.5	18171.2	12150.9	5004.05	10938.9	9514.01	3706.05	11891	1535.31	8817.84	1908.18	17378.6	1643.63	10559.8	23709	6165.89	29231.6	13097.8	1601.9	16543.1	10868.3	1817.91	13912.6	7443.75	11030.5	1957.62	10990.7	12604.7	1461.77	10817.6	13985.4	2290.23	18154.9	1672.04	1325.19	2055.32
POS	M137T44	137.068	43.73	38825.1	261994	31771.1	48494.1	128793	116615	87046.3	93455	36612.9	45889.8	81744.2	88002.9	107846	61091.4	92778.1	212210	105844	82955.4	371255	96641.8	97852.2	175030	138442	102684	74574.5	96443.7	172551	644545	157773	166518	145514	154176	264994	70412.6	32577.2	201844	54939.9	72854.2	215144	78692.5	90189.3	115896	75525	67411.5	55956.2	85694
POS	M137T283_2	137.077	282.532	37028.5	37907.1	37176.2	48934.5	48807.1	50991.9	32330.8	39296.7	34923.8	39240.5	43008.5	49261.7	59184.7	40758.2	25203.3	41965.5	39011.9	34117.2	46492.4	31838.5	32111.5	32155.9	37863.9	35766.6	39796.9	34354.2	48931.9	36623.6	39371.5	32735	34970.5	51829.9	55431.2	33605.4	36420	42572	49647.6	29943	36572	42248.3	58623.9	41105	42162.5	39434.2	37459.9	36029.7
POS	M137T26_2	137.075	25.7355	7971.55	26020.1	24254.7	10962.5	24770.7	20853.8	17750.8	17780.1	13669.3	5318.31	13532.2	22504.1	12405.2	5903.19	12621	11215.9	13189.2	12734.3	29527.4	10976.7	13087.2	20868.3	11833.5	14141.3	24114.5	12053.6	36429.1	14393.2	11592.4	16667.3	12993.9	23447.8	15053.2	8441.15	12529.1	8631.69	12632.2	12447	25452.6	11135.9	13162.1	24840.5	14103.4	22972	13661.8	20794.7
POS	M137T45	137.093	44.723	45259.3	330977	40235.9	55503.1	172573	145149	99513.6	7378.67	51125.7	11581.4	10806.1	131726	150109	9873.22	142993	253382	119559	13229.2	9642.82	117676	155260	8371.74	190962	7437.78	13348.3	8835.67	11223.1	2116.16	229918	212774	198709	194997	321678	14081.2	9918.25	247303	65701.9	74150.7	253624	101130	113236	165836	94892.8	10283.4	21146.6	118085
POS	M137T25	137.123	25.106	1711.31	706.313	755.708	1489.14	352.822	5277.11	18933.2	693.31	1063.47	1099.17	8573.89	5853.84	393.682	1227.61	625.825	444.148	1333.26	548.347	7074.95	6339.19	508.297	839.303	4283.32	3726.03	972.296	358.931	827.885	926.138	2348.68	750.487	568.511	5907.63	603.177	4494.88	335.592	392.753	433.824	3847.64	5894.55	2949.9	1062.38	171.582	914.24	572.166	3781.67	638.746
POS	M137T46	137.13	45.943	10094.4	5194.9	8824.37	15120.6	8701.54	17548.7	14920.8	11471.6	14262.8	11510.3	9645.92	9705.02	11389.9	10270.3	10457.9	9646.19	10441.2	10036.3	8040.83	15302.3	11225.7	9260.55	11596.2	15975.4	12880	9235.5	18586.5	6873.33	18030.3	9219.91	10511	11077.4	6881.92	6333.03	12129.6	14000.1	10699	11792.9	5617.67	7265.41	11039.5	11261.2	11613.5	13086.3	14728.9	9284.66
POS	M137T28	137.148	28.261	10523.3	770.668	1475.97	11382.1	1033.46	22175.8	1286.54	1070.82	15068.6	8281.65	1353.63	24100.3	13876.1	1366.72	15469.5	13124	1195.95	14345.1	1362.39	918.225	11374.7	1250.72	1096.79	13350.4	22650.3	13266.1	35753.5	939.019	10648.5	737.898	14609.9	24932.7	16100.1	9660.1	12811.1	10863.3	13643.5	16502.2	24002.5	14503.7	16163.5	25817.6	1042.5	20040.6	16134.7	20849.4
POS	M138T273_1	137.638	273.286	1143.52	553.348	1002.54	535.924	525.977	848.245	1048.84	449.964	1130.17	206.567	557.381	474.755	851.268	1489.73	2025.18	538.686	442.266	1068.72	1213.92	451.074	556.797	523.68	470.641	743.432	617.279	711.082	442.767	845.513	1182.04	540.576	806.593	369.319	587.359	1002.5	1844.64	592.12	1146	619.773	549.642	529.848	2023.08	1546.06	421.166	1492.18	2239.9	4142.92
POS	M138T332	137.941	332.337	2348.24	113.124	1122.51	1605.85	1125.98	2273.95	1357.24	1281.82	997.97	1060.59	1719.9	2003.01	2177.76	2592.87	2070.79	2098.73	1966.31	1889.53	2401.65	2007.16	1889.13	1105.68	1518.03	2225.34	1288.76	2149.57	2178.61	2718.37	1390.17	2581.16	1373.49	2373.05	73.2554	1579.62	1602.28	2990.99	3706.41	1717.16	1872.38	2144.54	2871.73	1613.39	2451.6	2424.44	1626.72	1188.12
POS	M138T618	138.015	617.505	23316.9	7930.93	2057.33	5269.76	8189.56	8814.66	17267.5	10604.7	18711.6	6321.7	8512.9	8588.07	8260.11	4334.08	8407.52	13282.4	10708.6	13721.5	8759.63	10636.7	11235.9	17882.9	8151.8	351.117	21134	7998.62	3067.25	8073.96	9991.43	4073.82	10989.9	2113.46	9347.85	13075	5611.21	8064.77	7849.68	7526.52	7467.2	8811.57	8617.3	8684.05	9153.9	8570.78	4901.07	9038.31
POS	M138T14	138.015	13.7755	2634.06	2571.2	2604.36	2551.86	2211.15	2659.96	3080.22	3941.11	2689.93	1621.33	2668.67	2430.25	2717.5	977.001	2516.75	2430.04	2720.96	2599.98	2493.85	2596.28	2664.66	2792.27	2375.67	2525.78	2615.12	2449.24	2444.19	2602.39	2592.69	2431.46	2574.3	2503.22	814.717	2703.29	2810.83	2523.91	2518.03	2786.69	2508.1	2146.49	2597.8	4529.68	2590.82	2651.06	2585.65	1191.79
POS	M138T209	138.019	208.633	412.656	2297.19	3290.39	282.908	1511.46	687.398	683.052	3086.93	2576.93	2209.22	1404.86	1252.77	2595.83	415.287	2266.39	2196.52	3290.06	1477.33	1501.75	715.169	773.966	981.439	1300.95	1849.32	1209.26	2190.89	2314.44	1512.61	1009.96	782.86	1784.75	919.647	16284.8	1137.72	1489.97	2300	722.416	547.499	1172.04	344.215	3521.63	1185.79	1502.32	868.442	800.103	290.46
POS	M138T287	138.019	286.96	420.629	263.072	432.26	439.352	366.573	358.558	485.297	512.365	358.164	343.731	1076.26	870.744	1311.59	496.358	752.974	827.269	493.093	436.609	744.506	1167.94	924.398	730.492	664.991	1315.04	616.087	1003.84	1145.85	1606.3	653.948	1152.96	693.876	855.628	342.148	670.565	1237.78	677.656	681.449	828.232	682.011	1267.71	640.1	938.978	715.277	1094.73	543.456	388.808
POS	M138T24	138.033	23.873	704.971	1408.72	1621.98	1189.43	4922.66	1533.01	1111.22	1557.54	1074.79	1398.14	1616.24	4474.35	1007.18	1250.9	1137.97	1506.05	1050.51	927.318	849.903	893.519	760.906	1458.54	900.169	1312.78	2275.1	1418.75	2851.03	1454.11	823.9	2419.35	1034.77	4552.76	1492.33	1348.28	1033.51	1078.23	973.591	867.671	1144.04	1784.21	2067.27	904.862	1622.26	894.39	834.061	2493.9
POS	M138T162	138.047	161.74	11617.2	109992	16137.8	15462.1	40884.1	15476.1	14704.4	29537.6	13768.4	24708.5	9898.64	10839.8	11004.8	14585.2	16845.1	25441.7	20422.3	12554.6	38034.4	23745.5	16951.9	21815.2	22676.6	12712.7	11865.6	22808.9	10489.7	36499.2	15968.4	29160.3	14175.9	15935.3	120176	21378.9	21120	28599.6	15247.9	16709.5	16537.4	21243.7	29554.5	17555.4	22754.3	16830.3	18308.9	12513.9
POS	M138T273_2	138.053	273.481	351725	161552	269736	188757	336650	414712	327709	250817	390765	63584.4	259493	132038	306333	581263	864647	119113	279966	327997	460506	105084	195207	144222	133034	351932	254466	188553	105646	251771	363916	154161	243585	121715	195202	333220	782637	147690	407193	185594	146849	156975	1.09004e+06	714696	124140	495772	921338	1.84087e+06
POS	M138T211	138.052	210.592	496358	71320.3	6701.76	18865.8	88964.1	171856	1.53684e+06	15725.7	35298.3	6176.45	18900.1	46424.3	131054	23014.5	72416.7	39978.3	128839	27810	21482.3	42742.6	35371.1	11657	28652.9	11141.6	34524.9	9234.24	51724.9	19131.9	59547.4	13267.7	15894.4	46443.4	45727.1	21245	141116	10752.9	43721.6	129582	14488.9	31657.4	18769.2	73788.3	48219.9	255600	422459	36943.5
POS	M138T149	138.052	148.649	10274.1	8735.42	11000.6	11993.5	9591.04	8857.35	8287.79	11141	9103.12	13072.3	8095.97	8237.27	12464.5	13148.3	12034.9	8715.28	8657.22	12770.8	9036.24	8871.15	8445	8532.4	8617.94	9546.85	9219.84	8976.65	7651.48	11122.5	8169.38	10136.9	10813.9	9718.91	9816.62	10674	9477.58	12785.8	12508.3	9608.11	9456.16	9828.41	11745.3	9115.13	9540.87	10638	8868.33	8788.54
POS	M138T251	138.052	251.357	7784.79	6052.29	7176.87	8276.08	8224.45	8572.76	10159.4	8323.66	8800.07	9997.5	9748.4	9272.77	10899.5	10975.4	12828	10214.6	13301.6	13177.8	9922.53	10288.9	11589.1	9433.32	11230.7	9910.25	8893.85	11130.8	9030.25	10778.5	10853.1	11346.3	8630.35	8836.14	7637.01	11039.1	13044.9	12727.5	11611.9	12596.3	10008.1	10131.2	13157.6	9766.37	10587	10671.2	9906.46	11396.5
POS	M138T41	138.053	40.9585	23246.8	19443.8	23284.7	19052.6	13612.4	34051.2	19413.4	17313.4	47206.3	10785.5	55184.8	31318.9	17084.2	22990.4	15856.9	19026	18216.1	16510.3	25009.6	15354.3	13870.7	13966.1	15955	192928	12953.8	19789.8	17069.4	39120.2	23150.6	16307.5	47001.9	34630	21108.3	23748.4	19297.9	19443	22921.7	13417.4	17732	11985.4	16125.6	18067.9	25474.3	14604.5	28618.5	32722
POS	M138T299	138.064	299.117	2594.26	2715.06	3567.66	1581.33	3572.04	4279.53	1550.85	2354.32	3563.55	1387.08	3515.87	746.728	4586.85	4531.3	4152.65	3110.65	3480.83	3581.93	805.172	3254.07	3492.34	6406.08	3033.28	4297.58	3223.78	2605.5	3004.53	2834.34	3897.07	2571.23	3857.37	2914.64	3052.8	3474.68	2087.74	3831.38	3776.62	3149.34	2979.13	4115.26	4769.23	4786.54	2757.75	3999.15	2943.26	2744.24
POS	M138T316	138.072	316.308	16953.2	15303.4	10724.6	17530.3	11836.6	14612.3	10688.2	19694.7	15392.5	21811.3	18456.7	23523.4	18041.9	8570.28	9451.49	16087.7	13822.1	18456.6	11910.7	11077.1	12043.1	27172.4	26984.8	12505.7	7570.89	29534.4	16403.3	39385.5	15275.2	13713.9	17138.7	26623.7	12135.3	18291.7	8792.32	9814.29	11954.1	20376.3	11377.9	12300.3	14805.3	34124.5	26785.3	21819.2	22825.1	12009.1
POS	M138T44	138.071	43.663	9457.18	14914.2	6163.45	9198.53	7671.98	17790.9	6902.99	4202.43	37456.7	2946.94	52144.9	21132.9	5416.6	13693.5	11516	13449.7	5398.46	31740.8	17948.8	16612.3	6462.64	8853.4	6715.37	3521.87	3913.96	9649.52	9962.21	34604.5	7952.03	9405.34	7159.32	23628	14944.6	8300.36	11397.3	11922.1	12293	3997.78	10161.8	11738.3	9152.97	6789.06	6358.15	5318.19	20939.8	26328.5
POS	M138T283	138.079	282.675	398.637	1616.87	453.622	511.752	9308.66	549.816	3087.68	420.808	380.495	2350.67	296.901	544.766	778.179	472.987	5622.82	464.991	374.252	254.218	637.287	279.011	259.229	157.257	352.695	2742.38	470.443	2535.11	4570.62	280.418	368.791	1936.76	286.949	517.971	536.954	211.783	4970.26	770.793	316.537	264.945	368.695	2734.78	551.726	5663.95	593.295	414.186	6551.2	8050.16
POS	M138T25	138.079	25.3645	532.44	1225.12	1343.77	1656.6	1196.98	1213.11	1119.68	1174.84	694.235	2026.88	783.057	1201.97	1010.42	2768.79	610.015	492.758	2819.12	2274.96	1252	481.845	732.4	931.247	782.346	8882.07	1520.74	785.102	1988.47	1405.4	3529.27	1210.54	648.997	1452.1	589.404	2045.17	676.581	2951.31	4237.24	1032.99	1331.69	735.29	753.537	7081.06	755.891	1009.81	912.021	1253.87
POS	M138T239	138.1	238.991	3628.08	3687.35	3759.37	1682.56	3736.98	3944.8	1667.56	3924.7	2479.38	3135.3	4042.69	3325.23	3748.32	4308.54	4432.41	3943.77	4353.38	4058.99	3743.94	3993.38	4062.6	4361.08	744.935	4109.6	3235.59	3967.7	3383.04	3843.22	1203.91	4361.58	3863.28	3700.13	3287.59	4341.67	3873.56	3801.78	4910.57	2786.21	3852.98	3662.24	4512.33	2908.86	3866.24	6078.16	5310.55	4648.38
POS	M138T26	138.106	26.121	14775.6	2900.25	11328.6	3986.25	4466.36	2829.88	5298.36	6774.04	7508.19	4307.04	2557.81	3496.87	4149.33	4915.77	6180.28	5448.71	4950.42	3759.69	2737.59	4014.84	4348.37	4566.79	4792.67	3637.69	4017.32	3751.89	3275.16	4691.66	4383.53	4898.33	5380.21	3363.01	4580.51	3060.68	4211.17	5026.45	7031.28	4861.85	4583.3	3320.8	4367.89	3179.26	4166.76	3761.76	3767.24	6305.62
POS	M138T46	138.133	46.263	7661.62	12917	823.312	5613.26	6799.52	1862.45	9875.6	4975.05	3975.96	1174.62	40446.6	17536.3	6204.73	821.976	907.149	645.755	725.568	988.652	16815.9	2001.95	645.428	10257.2	1389.6	39525.4	1670.01	6476.06	1562.34	913.411	8329.66	9081.2	973.371	7512.91	11366.3	15040.4	5398.91	9331.99	556.121	12317.3	628.516	670.352	770.461	740.725	11534.6	7400.51	1332.99	5999.46
POS	M139T332_1	138.917	332.195	41875	7280.21	31963.5	36906.5	35886.9	40590.3	32209.5	29813.4	28437.3	31273.3	35950.3	43366	45637.9	40221.1	38876.6	41802.7	33287.5	35928.4	39344.6	40020.6	38426.1	29050.1	38607.7	45228.3	35237.1	41989.6	46784	46879.4	38212.7	46463.5	31284.4	47674.8	10564.2	31579.9	39991.1	50088	60080.3	40107.4	35983.3	48525	47302.1	40831.8	51706.4	46920	37436.3	35723.4
POS	M139T332_2	138.936	332.307	14381.3	1189.57	7589.07	10085.8	10837.6	14521.2	9239.48	7887.09	6499.02	9100.72	11478	16798.8	16739.6	13155.4	11316.5	13556.1	10766.9	10493.7	12532.5	12358	10507.8	7576.91	12638	15698.9	10707.1	14548.5	15878.3	15526.7	10740.8	15063.6	9401.52	17507.2	1248.65	9239.87	12903	17748.3	26043.8	11634.7	11105.7	17138.5	15672	13390.9	17809.4	12985.2	10787.4	8889.78
POS	M139T43	138.985	42.7405	1895.68	1073.52	1992.59	3704.56	1999.36	1067.67	55207	1766.75	2050.86	1583.66	3706.39	1936.8	11517.6	2443.22	2059.33	1548.03	3663.57	1712.05	1825.44	2217.94	1392.02	2399.12	19207.6	3824.78	1717.99	32138.7	985.481	882.474	20930.3	2179.38	2641.92	1766.89	1153.11	1587.61	2011	2845.1	21206.2	2801.89	2415.4	34204.8	788.826	1655.68	2058.81	2836.11	2280.23	2047.94
POS	M139T151	139.022	150.788	7844.12	6340.2	8591.94	8593.53	5932.6	2676.35	7527.28	7654.04	7965.07	5177.28	5361.74	4928.18	7572.24	7231.76	9223.53	6710.43	7096.15	7708.05	8407.76	7034.26	8230.49	6292.43	5102.5	7862.29	7604.85	5140.76	6416.57	7061.13	11714.2	20436.7	7232.88	4331.71	7885.15	8483.7	6076.43	8797.06	6872.73	6763.35	8580.43	10823.9	7687.45	5237.03	7066.11	6407.84	8836.26	6381.16
POS	M139T149	139.048	149.049	7994.22	14289.3	9721.77	13296.7	12677.8	20356.8	10324.5	10149.6	8751.08	8412.24	11370.7	17782.9	18020.9	8002.58	8618.45	11702	10112.2	8658.69	12322.1	15055.6	14079.6	9164.16	12681.7	12240	5584.96	13493.6	7326.86	17022.7	8791.3	12379.1	10934	18400.8	9325.37	8335.76	8195.15	5924.26	1735.74	10362.8	6489.72	8861.41	17948.7	29068.4	17469.6	12616.1	16887.1	8259.72
POS	M139T25_1	139.04	24.8895	810.414	785.512	1020.67	1049.26	797.45	801.859	1084.98	881.194	1340.35	1016.15	2459.43	970.174	1062.83	1983.17	1615.12	1199.45	5165.82	507.461	710.392	805.348	988.497	789.664	1311.1	1435.14	5670.96	765.323	970.194	1021.49	1730.67	922.505	1071.22	2377.71	1174.75	813.218	1044.67	1257.43	2238.3	1105.43	1092.03	1079.6	1107	1134.14	1157.26	1010.27	1201.3	879.948
POS	M139T270	139.048	270.423	27675.9	22522	25697.6	35686.7	31646.1	28900.8	27467.4	33211.5	26697.1	114825	45026.2	31740.9	23063.2	67336.3	55599.4	27798.5	19377.6	35236.7	33386.3	50921	51619.2	36564.6	38497	37151.8	32488.4	37453.8	25034.4	56734.6	31477.3	40954.1	33181.4	39104.4	32117	57588.4	157505	70624.3	42243.6	25924.7	25025.2	17307.2	90644	48584.5	29889.3	34349.7	60389.2	106899
POS	M139T210	139.056	210.478	33627.5	6407.18	24306.3	22502.5	7072.85	13402.6	106162	21303	3084.35	24496.8	5325.47	4146.42	10378.7	23188.7	6235.63	3259.15	11062.2	22576.5	21454.5	4110.75	3365.02	22440.8	2243.56	22389.5	3016.33	23514.4	4845.53	23680.3	5182.94	4891.82	22847.5	3873.69	3875.96	21185.3	10369.9	3122.46	4582	10847.9	21992.8	3568.31	23125.6	21938.8	3869.3	19370.8	30965	21386
POS	M139T44	139.073	44.404	83231.3	68921.6	91671	83303.9	2218.52	81252	92914.6	88594.6	90161.1	83860.2	99364	84746.8	80328.7	93314.7	86964.9	82197.5	89804.2	1994.72	13147.1	88648.2	84771.2	94040.9	14200.3	1776.03	5645.9	85959.7	87784.8	10951.3	7380.31	85926.2	92050.2	77033.1	15322.6	13638.6	87323	90780.9	81870.8	89855.2	10271.8	82452.8	91813.1	82537.3	21066.1	89867.3	13785.3	95447.3
POS	M139T698	139.084	697.825	6077.93	4724.67	41806.2	58306.2	3453.34	51389.5	8508.69	2788.08	55848.3	5758.27	467.162	3620.52	56156.7	60053.3	2893.9	3799.44	53367	748.589	49492.1	2143.3	8143.89	50371.9	44792.5	29852.2	3999.49	47597.1	44233.1	1631.63	10782.6	38227.3	45077.6	2439.37	420.549	44005.6	60413.6	47852.2	42841.4	5246.18	44920.2	47090.1	7194.69	636.987	40807.2	1634.42	6294.33	53714.6
POS	M139T11	139.084	10.792	6273.72	306.59	7180.13	6339.68	6151.78	5864	6395.26	6421.21	6830.24	5792.81	6671.1	5990.89	6014.14	7100.72	261.315	6664.16	6090.14	5942.66	6001.13	139.917	6756.78	6582.63	6801.36	2313.62	6910.38	5928.24	485.296	6533.41	6983.41	7259.4	7157.01	6168.33	7061.61	6114.17	6310.74	7027.99	6128.23	165.613	6746.41	5867.38	6568.94	6041.9	6888.67	6674.99	6943.62	436.831
POS	M139T25_2	139.102	25.489	923.4	125.898	7983.06	210.21	241.244	611.756	377.867	437.034	556.891	455.151	1730.86	256.12	185.598	4423.35	555.279	335.126	526.633	395.89	248.78	659.076	316.229	212.26	3026.87	221.586	240.929	321.421	1128.02	788.231	3303.86	533.978	4020.81	219.216	911.91	134.077	180.619	231.119	321.263	921.281	626.814	481.647	399.654	320.76	223.164	1698.75	180.919	3031.64
POS	M139T48	139.12	48.152	202273	198047	90852.6	224428	198546	216775	228972	263243	173488	94937.2	225591	106863	214453	111478	179685	190835	205763	206498	212171	183171	202059	104144	227259	172667	109616	94515.8	213459	237476	177207	194853	184425	90708.9	119672	223506	201429	106368	213181	106436	115385	190174	106724	197880	233886	244628	201609	239136
POS	M139T26	139.139	25.923	35374.2	36777.4	38187.1	37722.8	39661.8	34074.9	37444.2	36713.4	36389.9	35835.9	38379.7	34937.4	38369.8	40381	50937.3	37639.8	39566.2	39008.8	36221.8	36481.2	37585.1	37868.3	37261.7	31443.5	36876.2	35701.2	34816.2	37806.2	37269	38213.1	39613.5	32643.3	39067.2	36831.5	36663.3	39534.6	36733.9	39420.3	37182.4	37870.3	40940	32700.7	36915.4	38329.7	34451.9	39533.5
POS	M139T45	139.145	45.484	89554	75291.2	95034.7	3768.02	5647.34	8033.97	98659	3228.01	5017.19	5182.02	5085.77	5941.65	5875.67	2792.91	4102.98	5436.8	5533.88	4409.12	3684.81	6043.9	92579.8	3148	4612.87	3896.05	4389.27	3892.76	6087.76	95421.7	3691.69	2579.55	4570.6	6819.76	90209.8	92965	4454.45	4948.05	3920.33	3104	3288.64	4530.97	3144.44	4247.94	100394	4931.35	5618.03	102020
POS	M140T425	139.999	425.269	3198.04	3275.81	1790.76	2308.97	2459.83	4224.44	3447.33	1267.92	2752.18	4525.2	1404.96	1439.97	2327.32	4134.31	1733.84	980.383	3119.72	3355.96	3561.65	2057.42	3393.85	1323.45	2830.66	1712.42	1809.07	2795.97	1746.75	1545.35	3112.3	1576.95	4565.15	2235.81	3710.1	3824.46	1969.84	1437.08	2917.55	3163.26	1218.66	2316.84	1884.21	1860.54	3311.53	2496.24	1563.49	2664.66
POS	M140T373	140.029	372.945	7601.45	3641.85	10075.1	3596.61	10646.2	8361.71	7088.57	12038	13498.8	2336.4	9159.25	12916.6	12468.4	5085.54	17363.1	8381.42	13271.5	9263.15	7730.58	9275.44	4452.87	3795.43	6492.45	10701.6	7979.34	5763.36	10223.2	9330.95	7089.88	8524.78	8116.6	13126.4	3460.29	4237.03	9232.17	8362.75	4979.82	8241.11	8445.67	7975.89	9305.28	8983.11	6774.99	14066	10033	3826.35
POS	M140T300	140.032	299.904	3019.38	681.764	2063.37	1836.34	558.754	1502.38	2392.71	1877.02	2614.55	1207.1	1266.7	1156.19	1643.22	1463.16	999.661	1102.33	952.562	958.699	996.41	1085.41	1229.75	1314.25	1677.71	2153.52	1669.62	1298.05	600.331	1072.8	1745.53	718.568	593.449	682.955	970.134	4154.29	3143.13	1117.33	1051.16	2138.81	1296.47	852.73	2082.99	2198.41	2954.5	2710.52	2422.3	2900.02
POS	M140T239	140.047	239.446	4114.79	2332.05	2684.02	3106.47	2631.8	2486.2	2531.53	4459.87	3347.55	912.83	3113.33	2515.06	2694.88	3106.21	3644.75	2821.54	2255.54	2008.98	2287.54	2303.81	2660.41	2221.93	2410.42	2200.97	2524.27	2499.46	2470.38	3766.44	2408.53	2738.22	2832	2506.18	3201.79	2449.98	4004.58	2923.29	3678.04	2752.89	2852.5	3471.22	3122.15	1996.12	2222.34	3321.21	2499.21	2574.22
POS	M140T149	140.051	149.49	4100.95	2789.42	4213.22	1128.43	4178.43	1290.27	1199.39	3976.04	4457.64	3157.01	519.759	1935.61	1169.33	4968.77	4089.28	4409.99	859.645	3341.76	3141.36	3727.77	1242.91	4110.08	747.917	1142.55	797.138	772.978	3188.23	1217.13	4557.1	1277.57	3937.59	1711.52	4268.69	566.887	3693.45	4266.58	3935.23	4052.31	3770.13	3631.6	1134.17	3752.93	1400.41	938.758	806.03	3907.76
POS	M140T270	140.051	270.457	5936.36	1687.68	2051.94	2210.87	2113.15	2192	2080.85	2648.02	1944.64	8855.58	3482.97	2672.26	1462.77	4671.39	4534.1	2522.49	2080.82	2939.58	2616.62	3811.62	4684.66	3000.25	2717.83	2927.62	1833	2783.94	1900.27	4167.06	2518.36	4719.66	2656.26	2814.92	6488.78	4512.82	13682	4966.74	3376.01	5361.81	1719.69	1536.73	7195.88	3204.51	1960.5	2742.44	5631.08	8422.84
POS	M140T24	140.062	24.074	712.162	2054.17	976.874	883.21	3312.81	1107.8	3861.74	1338.67	1213.92	738.325	864.922	2041.55	3769.21	3863.44	4342.42	4278.1	1523.76	977.533	1425.21	865.765	989.963	3757.13	863.923	5132.17	3719.81	1128.7	2632.59	741.553	900.336	1430.57	932.744	2380.75	4093.43	3161.42	1062.91	953.696	1134.91	1161.73	1670.15	757.719	4357.05	1985.21	883.524	1127.03	1009.6	2184.66
POS	M140T261	140.066	261.439	141522	127307	125937	147226	137551	120857	147372	114812	110267	134491	173393	141171	135617	133928	139498	145871	130871	94873.4	120686	140775	130622	150079	175188	125068	138630	122131	137712	132975	135680	121650	159482	135153	169549	157129	152261	115642	149718	131782	160793	137786	116703	147796	145084	127345	151429	172443
POS	M140T444	140.09	444.012	2256.28	5715.47	2024.22	2231.81	2159.22	614.146	2126.35	2559.97	1964.01	2854.85	1129.18	1560.49	1390.29	2056.74	1813.99	1956.09	2037.95	2090.82	2224.01	1894.34	2231.71	1866.01	1808.33	1963.12	1884.19	2501.12	1054.69	1791.06	1910.33	1462.81	2005.55	1992.37	3368.91	2116.58	1646.08	2121.78	1318.06	2253.1	1790.56	2004.14	1235.94	2309.22	1998.65	1895.03	2194.54	2396.5
POS	M140T25	140.086	24.831	842.997	4001.69	3499.06	927.813	974.537	700.853	879.816	3731.59	4423.33	3194.45	3928.99	3964.43	3901.94	4004.07	4242.14	1272.39	3638.68	1016.38	3345.18	4024.68	4330.47	4038.66	4306.52	3885.02	3422.25	910.774	1153.87	879.129	3795.75	3880.09	3597.71	4231.79	1500.77	3740.65	974	1312.58	3482.15	4350.81	1931.71	3716.53	1800.55	3373.77	1055.44	1044.87	3338.19	2453.73
POS	M140T42	140.104	41.75	21542.6	2674.22	13314	11771.3	7526.35	11787.3	28856.4	34597.9	12310.4	11502.6	60712.7	11846	10784.7	12476.9	11423	12040.5	11247.6	9100.8	58575.9	11614.5	12502.5	11093	15854.4	7784.44	13281.8	11719.3	2209.93	5358.96	25757.1	13908.3	66522.2	10969.8	9849.93	26942.1	10575.6	11495.4	6863.58	22480.1	16684.5	15258.9	10964.7	11409	32627.4	6213.24	6416.47	11578.5
POS	M140T26	140.142	26.171	3598.57	2540.15	3670.94	7274.27	3944.49	2858.27	3833.2	7189.5	3666.84	4023.97	4268.67	3248.62	3137.97	4722.26	4468.76	4079.23	4741.16	6863.98	6481.69	5234.27	4090.38	6897.81	3685.02	9167.93	3859.29	3540	3535.55	7039.88	3569.79	3490.38	4116.73	2902.9	3754.35	3757.68	3863.98	3913.92	3135.67	4251.69	4223.39	3186.62	3857.98	6510.18	4153	4110.18	3635.13	3229.77
POS	M141T332	140.915	332.162	7008.39	1196.05	4482.85	5977.04	5662.67	6669.17	5190.78	4814.25	4044.86	4930.75	6122.04	6758.77	7421.62	7142.34	5860.19	6644.8	5025.41	5770.45	6135.93	6723.28	6100.41	5169.7	6021.53	7131	6570.03	6391.05	7653.75	6630.24	6146.25	7306	5013.99	7822.11	1701.49	4685.35	5994.28	8054.65	9622.77	6083.57	5570.94	6787.08	6734.44	6775.87	8330.13	7938.51	5690.73	4991.93
POS	M141T338	140.992	338.131	13027.1	5616.34	6391.77	10463.5	9370.97	11061.9	10427.1	13769.9	7103.68	11582.2	14879.2	19501.1	18840	16141.2	13373.5	11832.9	13373.2	10955.5	7026.53	8211.04	10143.1	9739.49	11498.3	11573.8	15506	9699.31	13024.6	16648.6	9681.83	12203.3	14150.5	9958.67	5435	8025.58	10699.7	14826.3	10845.6	9844.91	15142.3	9634.87	14238.6	13584.7	20727.2	13942.4	9521.8	13339.5
POS	M141T273	141.038	272.939	10965.4	13484.5	12209.9	25055.1	16126	19256.6	14172.4	13101.6	14872.1	19064.1	13665.1	12956.8	27194	24708.9	12400.1	16073.1	13864.3	13678.9	16184.4	10656.2	15903.5	14012.2	14592.6	16552.2	15645.8	15671.4	16768.8	18001.8	13917.3	15227.8	14110.4	13808.5	17367.8	13591.3	12086.2	17856.9	14525.4	12978.7	17434.9	11777.5	13524.5	15545.2	14844.1	16437.1	16806	18783.1
POS	M141T239	141.054	239.369	873.995	1181.16	1279.9	1414.19	1634.01	746.331	1289.39	949.374	1743.17	943.206	989.25	1399.23	1317.21	1727.55	1416.14	1328.02	1608.58	1815.49	704.22	1356.93	950.665	1186.51	1569.81	1201.71	1168.63	614.182	1357.39	1655.07	1533.23	1105.13	655.481	953.379	1837.92	1096.48	1472.22	1426.77	1785.8	857.236	1457.43	1360.75	1726.58	1804.88	1028.89	923.306	1364.39	1774.63
POS	M141T34	141.052	33.974	14532.6	10762.7	15732.5	9744.35	10937.6	12322.3	14681.6	12051.4	619.153	9517.74	11342.5	6403.46	26201.3	13844.1	14221.4	13211.2	882.079	11662.8	414.509	13698.8	12808.3	12510.3	12192.3	975.775	23643.7	8544.91	12511.4	10569.6	10457.6	276.869	13491	7587.45	10473.1	12764.3	13054.9	13353.4	9453.31	11750.2	14099	8342.01	279.428	11334.2	15244.2	11413	14787	11456.9
POS	M141T195_1	141.063	195.315	17803	40895.9	16846.5	32393.8	18034.3	17448.6	49380.3	19474.8	39259.8	30040.3	35519.5	32485.1	22357.3	38521.8	26925.8	18894.3	27183.6	33413.6	23665.4	34498.2	25800.4	25448.5	24233.6	24384.6	34336.7	37219.1	26308.5	58052.1	25684.7	30679.5	26338.4	19966.7	26909.6	21956.7	33601.4	16735.7	30598.5	25708.8	22622.1	20347.6	22792.2	30558.3	30837.6	27448.9	23850.3	28999.7
POS	M141T388	141.063	387.938	18433.9	19582.3	14739.4	15128.7	14780.3	10524	14732.5	14752.9	18606.3	11060.1	20713.8	12463.5	10989.8	11871	11429.8	12660.7	12264.8	12803.8	11972	12626.1	20207.5	18902.3	13683.2	15013.9	21291.5	8846.23	14515.1	15328.7	11630.9	15707.7	17080.1	11455.4	14875.6	18431	18948.9	16120.9	11003.5	14684.4	19042.9	11001.2	15372.3	11909.7	13957.1	12226.6	17221.9	19981.9
POS	M141T286	141.064	286.211	65399	27185.3	72167.7	150515	96349.7	49420.1	59506.7	29913.7	160713	66265.3	52114.5	26791.1	64732.4	93114.3	25613.8	90799.5	49168.3	31716.8	34035.8	39715.7	51293.1	94587.4	30118.4	137245	36021.5	20550.8	21230.9	82550.9	56493.8	168002	52569.2	24197.5	49471.2	46399.1	23764.1	19793.6	41227.9	41045.9	43800.8	55175.3	28231.2	39770.8	25860.8	93212.1	69824.9	20393.6
POS	M141T261	141.069	261.483	7665.08	6756.58	6702.07	7572.77	6717.42	5333.73	4317.01	6344.07	4266.85	6417.03	10112.4	8454.04	6638.28	7201.31	7846.62	6424.68	7585.66	4604.87	6078.29	7314.44	6843.72	8051.29	9444.26	7655.4	6764.65	7445.14	5819.79	6567.37	7762.85	7622.26	9188.92	5598.46	8168.39	9125.82	5772.01	5587.31	7450.6	5844.89	9255.22	7577.06	5793.01	7978.4	7057.18	7431.33	7584.16	8592.02
POS	M141T195_2	141.111	195.315	4318.8	7547.19	4482.14	3959.32	4062.27	19730.3	3658.36	4925.96	4749.21	3491.05	3348.35	2317.17	3295.02	2322.58	3896.89	4672.93	2683.7	2422.56	3166.76	3530.17	3791.1	4362.92	3955.54	3286.05	3258.74	3432.34	3049.35	4353.84	4772.59	4477.54	4250.6	2597.29	9384.51	4743.97	3666.73	3218.6	2024.08	3601.41	4227.07	3132.78	3809	2886	5903.87	20924.1	3760.05	4628.83
POS	M141T25	141.117	25.2195	1269.68	3318.84	3110.85	818.053	2969.69	1185.32	1965.08	1039.04	1510.7	1454.23	1584.14	2714.99	622.507	809.872	2141.11	2974.77	1254.92	831.514	2627.83	1017.36	901.41	2536.98	2795.34	3701.75	1685.12	1390.99	832.776	717.749	811.368	2862.18	811.597	502.795	3238.13	601.78	1273.77	910.048	1638.03	3000.73	709.164	795.122	3194.46	1012.97	823.208	1040.31	892.865	1635.47
POS	M141T48	141.136	47.9035	35301.6	57030.1	40309.7	41572.2	75366.4	52268.7	71867	84804.1	99607	71062.2	64968.5	69235.1	79628	35845.1	38952	85875.9	33072.4	70128.5	83038.4	70842.9	89810.7	35208.8	42582.3	85887	78040.5	74052.2	73354.1	37984.3	75996	47289.5	69900.9	27866.8	61072.1	34477.9	79356.9	92089.9	75987.7	79541.6	77749.3	34906	88147.7	75418.9	41221.1	36597.5	44303.9	84840.2
POS	M141T26	141.154	25.5485	14227.2	14510.7	16638.8	13709.9	14085.4	12793.6	15421.5	15161.4	13451.7	12702.6	14780.8	14095.3	12699.9	16808.3	16030.7	13842.3	13807.2	12569.5	13584.9	14152.4	14724	14434	13782.4	14178.6	14183.9	12730.7	13424.9	13334.5	15041.5	11353.9	15290	12497.5	15186.9	15757.1	13724.3	13177.7	13392.1	13403	15012.3	13610	14994.5	14081.4	13697.7	16307.7	13974.1	13923.7
POS	M142T358	141.982	358.25	5753.51	5659.37	5068.65	7492.74	6464.36	5791.72	5448.25	5367.67	3981.82	5631.39	7540.04	7845.36	7469.93	8719.72	4871.61	9291.87	6845.44	5747.7	6278.1	7177.02	4578.28	4607.55	5969.13	5561.54	6630.91	4540.45	5743.68	5971.84	5644.25	5930.75	4468.7	7044.76	6996.11	5047.72	5693.44	9358.19	5945.82	7261.25	5975.22	6272.28	7872.22	5411.59	5638.29	6276.38	6875.95	5824.12
POS	M142T189	141.996	189.263	317.667	1310.31	805.784	785.089	1276.01	677.261	696.363	729.456	735.352	559.177	1035.06	1568.28	1838.94	1925.55	1484.95	1552.96	1770.4	1168.99	816.4	986.149	1010.46	1829.2	1850.8	579.732	858.417	797.036	913.801	778.601	1171.89	667.628	971.163	1568.02	401.44	1431.91	1451.99	1531.69	1035.2	1015.21	967.176	786.785	726.35	1968	1132.72	638.558	1443.22	610.375
POS	M142T256	142.047	256.091	3849.01	1233.58	2717.46	3181.39	911.345	1901.52	1618.53	2247.34	2906.96	2567.62	2635.74	3645.94	3162.43	1501.73	1237.81	1858	1357.16	826.838	1901.71	2727.18	3925.71	2011.88	3960.93	4959.17	3572.37	2282.44	1010.15	2257.07	4646.23	1191.43	869.597	1800.88	2876.97	5130.84	4719.01	1593.95	2523.48	2391.91	2534.21	3266	5834.72	3013.38	5880.98	6961.11	4107.02	4670.64
POS	M142T372	142.047	372.446	3870.23	3291.63	5193.62	3310.4	4323.84	3588.7	3927.35	4491.82	5871.91	2297.46	3696.48	4968.55	5376.08	2556.58	6158.62	3774.68	5133.41	4271.5	3002.8	4285.31	3339.99	3934.91	3243.39	3365.85	4672.21	2999.04	4696.92	4059.46	3803.5	3422.96	3894.63	4911.45	2515.61	3410.73	3642.87	3261.71	2304.36	5089.21	3089	3484.57	4027.28	3813.81	4547.89	4813.05	5249.76	3134.53
POS	M142T286_1	142.047	285.662	1512.76	541.481	3889.21	712.564	503.821	1591.49	2137.99	2485.74	4513.72	539.267	964.784	1454.57	1842.67	835.601	2049.98	879.7	1831.33	1673.62	1221.09	884.89	634.455	840.386	1000.71	1218.57	974.989	1056.75	1475.94	1012.4	1101.49	811.232	889.149	1107.04	732.537	730.277	1300.56	1449.38	805.935	902.368	1152.32	673.214	832.232	1199.65	1630.55	494.298	1014.04	709.669
POS	M142T239	142.063	239.365	17948.1	18804.3	20637.7	23832.9	20457.6	20104.8	18096.9	23418.3	20061.4	15349.1	22564.7	22646.8	23836.4	17158.8	18180.8	20468.8	21105.5	17217.9	17549.5	19261.9	20567.2	18260.1	17696.1	16334.6	20846.5	16531.9	19016.5	18831.5	19632.5	18912.3	20602.4	22981.2	23356.3	15345	20075.7	21413.4	17270.2	19341.4	20742.6	23002.3	26144	18362.2	19854.3	22476.5	20120.4	23571.1
POS	M142T286_2	142.067	286.175	4720.02	3615.7	5050.97	9096.22	5857.99	3036.42	3996.6	2005.35	9484.2	3997.01	2696.46	3801.8	3862.99	5872.9	3707.4	5445.52	3820.92	3859.88	2386.09	4195.56	3727.06	5586.65	1784.82	7989.98	2579.29	1541.5	1538.1	5101.26	3136.9	10116	3131.95	1735.06	3374.11	2449.93	3656.69	1425.73	2490.39	2624.1	2358.12	2952.94	2056.33	2899.94	1562.08	5477.33	4554.66	1189.8
POS	M142T242	142.084	242	31226.7	19275.5	16375.6	16229.3	33046.5	9748.22	10795.4	29016.9	8122.25	5334.18	6666.8	5970.6	8281.98	114220	10053.8	10661.2	6714.87	38111.9	12627.1	5502.8	16728.6	8828.84	10308.4	15223.7	10239.3	7755.28	11512.4	4907.93	10915.1	9605.57	6417.46	18066.3	8925.76	74475.9	10675.5	11926.4	15159.3	15894.6	9499.66	11482.6	16227	11043.7	6507.56	19009.9	13995.7	19771.3
POS	M142T150	142.084	150.147	9722.85	7747.24	21413.7	28801.7	6313.03	7116.23	19703.7	10127.7	17670.3	9822.92	13450.4	9980.13	18168	38774.5	10954.8	14032.2	8490.81	15257.8	8973.71	8647.54	12899.2	21700.1	24309.6	9409.35	16057.8	14813.4	6570.77	18905.3	15708.6	6050.59	6011.25	7189.25	12806.7	43855.8	29806.4	15769.7	11205.9	33219.8	9712.21	8560.92	17954.5	25708.7	28771	15076.5	18118	27880.2
POS	M142T293	142.084	292.579	366.219	8542.46	8360.02	15756	15878.8	600.583	7586.94	6858.71	12553.1	6092.64	7313.51	9832.7	31805	27777.9	12239.8	5017.09	3745.91	44356.2	6819.91	6834.86	5825.12	9659.43	10403	8594.95	23338	8175.12	2441.96	6246.48	23788.9	19711.2	18443.7	4836.36	9267.41	11031.1	10464.8	7889.94	6718.04	27443.8	6111.99	6959.98	22694.1	13638.5	17163.1	24101	11678.9	28574.4
POS	M142T26	142.102	25.5095	2126.02	487.326	1228.11	789.785	578.627	2316.09	859.78	620.337	497.718	638.898	737.949	576.774	647.487	660.174	716.145	531.133	1051.85	643.343	585.354	774.727	949.679	683.721	570.063	389.599	2030.56	474.335	2179.45	2371.47	461.417	584.016	2259.84	418.115	530.09	2285.63	2275.99	526.761	2246.46	699.799	710.395	520.367	2505.87	2303.86	2363.2	2066.58	551.965	856.72
POS	M142T163	142.131	162.764	1040.76	7431.82	2755.19	2195.8	2045.9	1052.76	1418.36	878.019	1544.14	1483.65	1708.71	3423.48	1836.67	2098.57	1169.24	1663.26	1029.58	2032.2	1327.23	1572.64	1972.16	2125.72	2365.4	1434.98	2114.97	3457.35	1358.07	2266.2	1529.87	1823	1972.99	1511.58	1874.86	1537.22	1581.53	6058.75	2699.57	1407.41	2275.05	1062.63	2154.67	2563.56	2577.64	1471.21	1111.98	4235.19
POS	M142T25	142.158	25.42	1449.02	1343.05	2037.3	1582.07	1701.75	1152.79	1570.86	1681.72	1527.85	1399.63	1580.25	1506.42	1237.88	1814.72	1732.03	1528.27	1640.12	1849.91	1458.14	1392.1	1619.48	1379.21	1323.07	1727.81	1594.04	1174.55	1139.11	1793.97	1863.01	1425.69	1632.76	1259.93	1442.3	1521.57	1741.25	1587.61	1041.74	1676.06	1531.77	1155.06	1643.24	1238.33	1158.15	1451.9	1473.76	1493.48
POS	M143T407	142.936	407.4	1737.89	3523.88	2146.33	2258.72	3296.74	1872.58	2375.9	1950.86	1962.11	2230.26	1946.39	1557.63	2336.01	2350.32	1782.73	1992.35	2249.35	2487.19	2227.34	2301.2	1469.96	2110.21	1379.38	1208.84	1568.07	0	1696.24	1766.58	1625.06	1221.47	1553.32	2147.63	2086.02	2382.72	1681.34	2280.76	2284.93	2171.28	659.839	2362.61	1119.79	2263.01	1387.15	1947.39	1856.02	1558.98
POS	M143T296	143.029	296.048	14635.6	12222.5	47896.8	15799.9	48167.9	53461.3	21103.6	35882.4	27645.3	5265.54	28058.5	25123.9	30056.2	12319.9	40359	43803.6	37640.9	15710.1	45271.8	16240.2	15863.7	11894.9	16932	21172.7	23637.1	23449.7	21604.9	24965.4	18176.1	18925.9	27942.5	23806.8	6074.45	11142.6	27861.5	23218.8	13395.7	14901	26101.5	18061.5	22818.5	23530.8	32656.9	28959	21570.9	10707.9
POS	M143T373	143.029	372.875	9708.38	5109.95	12734.7	6338.54	14925.9	10405	9800.43	14553.2	18900	3019.15	14523.7	16307	16816	8834.12	24822.6	18592.3	18297.3	14007.3	11227.5	12366.7	7028.31	5311.54	6759.77	22108.5	11936.8	7737.81	25243	13172.4	9643.03	13184.6	10650.5	17717.7	4271.76	5541.17	13852.5	11332.6	7011.4	10324.9	10891.3	10920.3	14868.1	12419.8	17898.4	18513.1	15593.5	9124.28
POS	M143T358	143.029	357.927	2890.59	3205.95	11165.8	2667.41	9882.7	6570.54	4872.84	9934.65	7962.7	1512.13	6588.48	8211.93	7754.65	2443.01	8297.34	5863.65	8653.64	6321.84	6866.12	5622.29	4364.33	2549.38	5031.5	6364.22	5110.66	4782.32	6800.3	4849.27	5081.87	3336.41	6441.94	8225.32	2285.1	2801.58	4993.03	4885.81	2873.26	4395	5124.79	4732.01	5629.67	6790.74	6633.61	8711.22	4081.84	2465.61
POS	M143T317	143.029	317.238	3521.23	2458.3	10657.5	2768.02	3562.89	8183.18	3987.59	7241.12	5476.16	1177.05	5393.33	4208	1895.45	993.485	4495.96	3163.31	3672.96	3214.09	5686.72	4329.61	3656.11	3196.89	4903.46	4339.49	4094.32	3851.87	1431.16	2132.63	3975.46	4804.73	7071.63	4170.67	1898.19	3123.38	3183.65	2101.15	2483.24	3295.62	1836.97	3549.54	2706.06	4118.09	5686.5	5092.04	3664.06	1540.98
POS	M143T281	143.046	281.419	1442.49	892.431	596.369	624.83	882.828	1216.99	667.209	659.701	597.377	791.205	1162.69	1231.25	1855.08	2143.89	1347.36	1720.47	1520.87	1013.19	972.884	1237.77	1470.52	1112.8	1975.15	1220.65	3057.44	1150.36	1383.48	1299.01	2079.5	1598.65	943.072	939.113	885.524	2026.42	1849.97	1374.13	2041	1847.04	1299.54	1319.59	1149.22	1181.46	1741.67	1060.67	1465.25	1380.26
POS	M143T369	143.054	368.891	4050.53	5811.31	4253.59	8366.18	3900.92	8276.28	3338.64	4399.33	4021.86	5347.96	4850.18	5373.71	6962.47	6623.07	3999.49	3973.86	2477.5	3535.7	4924.99	2934.96	4831.3	3761.37	3369.49	2510.88	3763.17	4413.34	4855.96	4408.31	3480.98	5881.63	5601.23	3212.28	6146.58	3090.26	3220.89	3861.29	1718.08	5743.71	7350.14	5313.79	5829.8	4107.75	4992.63	4123.97	4422.95	4236.22
POS	M143T25_1	143.065	24.624	1254.36	1309.16	1724.72	1637.09	2700.14	1964.12	1082.73	1399.36	1141.48	1122.01	1047.32	3365.81	1880.94	1522.72	949.272	2035.3	1086.74	1678.72	2061.83	1553.95	1012.52	2020.61	1079.77	1410.99	1531.92	1498.91	3448.23	1150.72	1775.98	2443.46	2221.21	2873.83	2069.14	1569.46	1128.36	816.028	1914.92	2144.44	2077.76	1221.06	1233.71	1991.83	1841.08	1846.48	1495.08	2361.66
POS	M143T239	143.07	239.243	19309.5	17944.9	20169.5	22819.8	20416.2	17695.8	15916.6	21699.3	15877.8	13792.2	21088.1	20750	23934.4	18661.1	16788.2	22537.2	18089.8	14462.8	17714.9	16417.9	19327.5	14606.5	15978.9	17298	18571.2	15501.1	16423.8	18140.3	20788.2	16900.9	22212.5	20581.4	23418.3	17756.8	16549.2	21051.7	16023.5	18928.2	17991.8	21351.7	25380.6	18621.3	20079	21264	18436	24196.3
POS	M143T182	143.07	182.407	2186.49	2003.74	1394.65	5165.97	2656.91	1732.05	1883.04	2625	3646.52	2753.86	3111.15	3713.89	6841.93	1919.36	1948.68	6357.85	3178.21	2477.18	1059.57	1149.56	1734.13	3315.15	4815.29	2858.13	3739.71	719.125	3462.03	2065.1	2166.53	5168.95	2599.01	3483.4	2911.31	2803.28	2012.76	6544.66	2086.32	2455.13	1270.88	1385.43	2454.55	4452.3	6873.04	2350.83	2615.78	1636.66
POS	M143T311	143.079	310.761	248376	99632.7	163091	191326	184564	164561	215226	205231	259992	263824	136737	179692	151049	201572	120571	179408	119434	183622	108768	164167	176326	193102	136527	202028	168596	134683	110130	113035	142846	95854.2	129283	164548	138505	191062	197938	185038	139052	165066	129998	167211	207600	277437	191517	213039	183953	265022
POS	M143T377	143.079	377.116	74476.1	11554.4	48592.3	64963	52105	53472.3	52123.4	35925.9	43423.8	45791.6	8829.31	43920.2	13594.4	38059.7	16549	36214.2	33441.2	35213.8	21183.8	12705.6	10270.3	8397.14	16325.9	10903.2	24975	9495.46	18405.4	13182.3	15624.4	16741.1	8333.8	49226.9	11645	41674.3	41867.5	38366.7	51038.4	10756.2	27319.3	19550.7	10049.2	36975.1	47345.8	8548.19	39445.4	23584.4
POS	M143T434	143.079	433.774	16715.1	9887.05	13900.3	14069.4	11349.8	13010.1	11589.4	12817.4	13144.6	6217.34	11857	14571.3	13949.1	12380.4	13328.7	14202.6	12390.5	11673.5	11406.7	13610.1	28139.7	13121.4	14341.5	12705.9	15098	5758.73	10981.4	10337	25537.7	17045.7	14617	10477.1	21920.7	15149.9	11980.5	12516.4	10106.9	13295.1	14682.8	11401.7	14841.8	10230.5	12751.5	17902.5	9110.93	14489.8
POS	M143T55	143.079	54.948	10671.1	2539.43	11412.5	17776.6	17957.4	7374.68	26027.2	7136.31	20172.6	17482.7	4674.11	10361.3	3904	7233.4	2945	6633.55	5334.11	5515.34	2634.72	4061.25	3207.88	2762.61	3867.43	3666.15	3230.48	3265.5	3065.44	4386.69	3292.05	3378.64	3893.79	6736.53	3445.73	7086.42	8012.83	7701.6	10382.7	2623.01	6523.56	3329.39	3819.99	5574.97	7684.47	2968.22	6996.22	4913.14
POS	M143T242	143.087	241.815	609.867	5430.62	8294.14	235.422	2856.19	10603.6	973.504	7322.87	1113.74	6633.19	8931.9	7814.89	9494.79	10844.4	7015.18	8989.77	5989.68	3851.3	7089.34	5299.83	7555.67	6893.52	627.22	6230.15	6221.02	533.1	7435.55	8940.72	6760.81	7899.05	5465.35	8048.87	7776.16	7828.92	760.154	8698.1	6758.39	6838.14	6196.57	9168.67	7846.06	963.517	8739.78	8253.95	6834.24	7262.19
POS	M143T45	143.104	44.644	5329.79	5938.08	6728.44	6484.86	9331.69	9723.13	8048.78	3901.3	8002.76	5864.49	7088.93	6807.33	9964.37	9710.01	7108.62	6698.85	6883.02	8716.33	6771.13	6265.43	5009.2	5110.01	4157.16	5110.07	8101.18	4268.6	7274.7	6236.96	4463.25	6533.94	6498.8	7591.56	2077.37	7848.43	8813.79	7009.28	7079.22	5026.87	5465.06	5523.43	6717.09	6309.92	9598.06	6475.62	9629.6	6855.97
POS	M143T75	143.115	74.569	43244.8	14843.6	31125.6	46284.8	24760.5	34706	39920.8	38013.5	33586.5	14681.6	17292.5	24035.4	53376.9	32163.3	38254.5	42698.5	44820.8	49945.2	38152.9	10692	29754.9	5796.9	30728.5	28764.8	28401.1	27334.8	17893.6	23395.4	40107.3	38622.6	20387	27203.3	34259	36076	40298.6	68645.3	60251.9	69216.3	44039.4	17630.7	39343.3	9012.76	46144.3	28678.4	34598.2	36377.8
POS	M143T346	143.115	345.888	1418.05	1689.41	3223.77	2097.86	1921.79	1868.73	3703.37	2352.81	1531.86	3831.61	1854.4	880.901	3116.74	4519.08	1877.64	916.013	2338.38	2218.09	1529.26	2268.34	6795.51	2950.85	2715.33	2227.69	2499.91	1962.97	1624.02	1933.59	2304.42	1505.73	1736.81	1810.01	4925.21	3729.82	5053.77	1568.31	3866.45	2248.68	3101.73	2106.26	1258.61	1995.36	2739.04	2975.02	2080.49	1426.38
POS	M143T313	143.126	312.503	148614	698.536	659.441	653.094	188219	118547	164872	138942	766.213	189092	659.939	799.574	1050.68	1193.64	96938.9	795.268	89714	96359.8	84587.1	582.981	101915	105987	1170.92	1079.81	802.323	93545.1	74379.9	561.844	1293.21	91760.4	82874.3	489.059	990.803	895.439	1907.74	441.491	710.17	1092.96	927.031	509.203	1531.84	810.911	1587.76	1670.44	1089.86	1489.41
POS	M143T713	143.151	712.594	2305.36	10133.2	8946.51	3872.17	6528.55	7877.37	8571.97	10948.2	9312.18	1204.93	8439.02	6837.23	6015.32	6951.51	9221.72	15367.7	6606.76	4998.85	7356.76	9692.86	8719.8	5340.13	5667.6	10437.4	5240.01	7503.64	12010.3	8527.95	8728.02	9215.78	5021.05	7550.81	7249.8	6669.86	8240.25	8500.65	7131.72	15175.6	9323.59	5133.37	1230.44	5676.08	8430.07	8555.4	8556.64	9056.51
POS	M143T692	143.152	692.186	12026.2	10773.8	16194.5	6965.26	6646.17	4857.91	7262.43	7010.29	8048.17	8173.4	7474.61	5914.99	10977.2	7825.78	7038.88	7851.48	6342.53	7047.35	6338.18	5858.58	7571.43	6969.78	13470	7599.44	7252.91	5034.06	5324.49	7118.49	6953.21	8851.5	5815.88	6239.27	7851.07	6688.95	8229.15	6706.82	5613.06	8244.3	7505.97	6331.33	7868.47	6709.88	7764.1	7402.12	16819.2	7281.38
POS	M143T672	143.152	672.102	3789.83	9097.4	5451.16	5749.58	4670.81	5262.46	5770.47	4812.07	6647	5456.88	6302.39	5481.21	5404.39	6192.58	6326.98	5428.24	5169.15	6970.95	5109.48	5823.32	6090.94	5552.59	6166.6	5778.8	6327.03	4516.92	5477.57	5864.07	6598.75	6596.13	5469.59	5220.96	5802.39	5623.72	5755.48	23939.9	4258.42	4717.78	6346.44	4929.85	11523.2	5583.83	5045.7	6143.55	7713.69	5825.48
POS	M143T25_2	143.17	25.279	11407.6	11914.8	11540.4	11917.2	13682.8	13113.7	10868	11479.1	10739.4	13844.7	11845.7	12236.5	13430.3	13382.3	15192	12198.4	13682	13337.5	12274	10801.6	11838.9	11401.9	11593.8	11988.4	11733	13846.1	11498.3	10616.4	11244.4	11543.4	12218.8	13146.9	11823.4	12793.4	10867.5	11625.4	13047.8	11919.7	11197.3	12597.9	12499.8	11563.7	11279.9	12638.7	11662.8	11805.9
POS	M144T259_1	143.666	259.441	15457.3	14287.7	24196.5	13527.5	2413.84	16391.8	12383.6	21399	38174.3	8656.23	1574.26	1777.97	9749.23	8897.22	5359	2129.25	3430.39	31238.9	11053.9	6064.22	8220.32	8997.69	1856.57	17402.3	4900.66	13349.1	15228.3	1207.38	5758.49	5156.34	1647.56	2311.98	4471.18	3947.19	4164.3	6331.66	2768.03	5969.07	1727.81	7722.87	16086.4	7652.9	1520.56	1782.84	2973.1	824.618
POS	M144T287	144.006	286.768	1540.98	2016.9	872.278	1610.75	674.074	458.477	751.96	728.155	994.704	295.019	740.03	896.467	726.474	1537.04	694.737	712.635	839.723	972.493	730.109	434.802	758.631	763.032	685.184	506.549	450.005	433.277	508.234	405.605	563.359	729.888	519.148	935.715	2671.86	841.214	871.825	961.74	532.338	787.842	1161.72	426.694	836.036	426.858	421.417	422.219	1584.49	413.67
POS	M144T239_1	144.042	239.441	2222.77	2735.52	2751.05	3978.58	2762.65	2829.77	1993.41	3760.68	2620.12	2423.15	3115.19	3081.98	3973	2705.84	2180.76	3093.47	2466.29	2073.69	2828.19	2636.87	2821.97	2209.49	2050.01	2613.52	3120.16	2444.18	2441.82	2698.75	3422.46	2727.45	2960.69	3643.56	4231.13	1934.45	2566.2	2851.52	2799.52	2531.98	2973.89	3417.9	3833.27	3426.93	2799.27	3050.81	3217.83	3443.7
POS	M144T185	144.042	185.35	1142.39	823.414	2543.37	2107.67	1805.23	1808.34	1968.37	1031.99	2277.96	2190.28	2633.56	1569.46	2024.46	1269.92	1081.61	1659.5	1378.69	1683.97	754.921	1145.18	2236.73	1402.06	1866.28	957.791	1252.38	1109.04	1314.8	1486.64	935.608	1552.75	1703.49	1677.77	1217.76	1285.43	1306.39	2305.37	1110.2	1545.14	814.725	2045.14	1704.09	1685.49	2149.35	1339.49	2121.4	1037.16
POS	M144T39	144.044	39.155	3866.43	291.56	2343.94	1370.79	1672.54	18078.5	1696.39	1628.78	1791.78	806.575	15942.4	147580	2497.03	2792.63	1651.3	1169.89	792.739	1512.01	543.692	3176.56	794.214	1308.63	7200.93	632.907	7414.63	508.847	272.487	448.157	3931.92	26353.9	12924.3	161770	810.614	1296.55	1477.76	1625.72	5026.32	2218.87	1367.21	505.764	816.856	1223.5	1599.29	1068.56	1600.11	1027.8
POS	M144T219	144.063	219.432	13642.2	8953.57	11921.6	17721.3	19873.9	16667	21533.3	17366	24493.4	12629.5	18924.5	26482.7	35129.2	32131.2	25259.8	25607.7	27627.2	30935	13708.6	16506.8	12449.1	10824.4	13663.7	21185.6	19142.2	8048.15	14717.4	8958	20908.2	10083.4	16667.1	15162.2	11717.5	12595.6	13472.6	13409.3	8277.77	14479.4	13043.4	11794.7	21803.3	21454.4	19748.6	20257.4	21811.9	13121.1
POS	M144T388	144.063	388.111	5404.45	12129	7763.84	8464.78	10232.3	11431.2	5584.04	12981.3	842.426	8556.05	8139.55	8768.29	13558.6	7849.81	8182.03	8490.21	8227.07	27199.2	7942.55	8096.17	2170.7	4559.99	7969.45	6512.19	8826.45	7355.73	11059.3	8650.24	7663.93	5779.76	6225.07	8014.69	11911.7	4594.21	8365.84	7647.71	7952.03	7952.54	10134.2	7577.36	7815.32	8491.29	9808.27	7964.44	9497.56	5861.67
POS	M144T244	144.063	244.413	6279.99	19656.8	7456.93	34013.8	37467.5	42932.6	9364.01	24501.9	7786.07	5954.12	34299.2	29495.4	37228	22511.4	19022.5	34306.6	24409.2	20940.7	32223.6	22075.1	29411.8	23512.7	7745.6	12846.5	21819.9	6180.45	27799.2	30237.4	8160.35	27952.7	18948.3	30470.7	24626.3	10043.5	8814.25	30038.2	9830	15710	26065.4	35876.5	6482.75	9198.06	7626.36	9616.68	11483.1	15179.5
POS	M144T361	144.074	360.758	16918.5	20859.6	21415.5	17342.4	13837.9	11115.1	17985.1	18955.8	17524.2	17929.9	16862	14566.6	11599.2	12028.8	15300.1	12521.1	18901.3	15080	15390.2	17382.1	15975.9	23595.5	19541.1	14839.6	17334.5	18010.7	14296.2	14645.6	16339.1	14520.3	20016	13454	22513.8	20290.1	19242	11361	12483.5	16556.6	16188.3	16696.6	14324.8	13163.9	13136.1	14229	17505.1	18711
POS	M144T326	144.074	326.102	10206.9	36994.3	43411.8	10942.1	3766.61	72707	8655.93	7948.92	38342.8	19488.6	27707	28721.8	5509.72	58386.9	6850.48	6752.21	25200.2	52920.2	19255	13792.6	18057.6	47077.5	9139.17	6614.68	11478.5	59324.8	29453.1	18659.5	49459.5	22854.8	25573.9	12664.3	15819.4	37103.3	9496.03	36320.5	10141	25300.8	15601.8	67918	7068.67	29703.3	36771.5	54969.5	15204.8	36164
POS	M144T239_2	144.079	239.36	95476.4	100490	98841.8	123480	110348	96894.9	81643.2	105779	97909.5	80277.5	117981	109637	135882	97632.4	89327.8	120399	87327.4	78573.4	99225.2	92250.4	104681	75579.8	79704.5	81062.3	97226.5	81079.9	83747.1	91286.2	99869.6	92375.7	106826	108944	135009	85094	93681.3	110710	88250.4	94242.7	95589.1	122363	142303	101586	97588.1	119605	99633.6	114441
POS	M144T182	144.078	182.399	7672.95	10210.5	5873.47	28999.6	12922.6	9936.07	8599.28	13443.3	15828.2	23947.1	14869	16317.9	33819.8	10898.4	9238.91	29882.8	17788	10450.7	4281.17	4671.57	6555.14	13280.2	29144.5	8845.44	16620.2	3152.95	23024	8085.73	10487.5	22494.2	13259	17973	15607.5	9496.26	8683.97	30936.6	9610.48	12818.9	4412.09	6715.13	13902.1	22620.5	32566.3	10404.2	12126.6	3914.2
POS	M144T151	144.078	151.182	6961.11	4990.99	6932.44	6752.14	10474.3	4866.68	8364.38	7379.76	8669.69	4440.81	13061	10210.2	19198.1	30416.4	6462.44	6509.45	16308.9	7254.63	5973.1	8641.23	5335.12	5594.65	14173.5	11816	8321.05	12680.5	8094.44	11881.5	8403.31	7583.21	14445.2	9161.69	17154.6	38799.3	7129.44	7347.22	10331.8	8949.34	7071.26	6835.27	6711.94	7270.92	22288.8	10677.9	10284.8	6617.85
POS	M144T311	144.082	310.863	11897.2	7829.95	60460.4	42556.5	12787.9	48196.2	12803.8	10230.5	100823	15238	9851.51	30284.8	43081.8	12771.7	8048.97	25358.9	24062.6	101423	7089.02	9265.74	10216.9	11334.9	9002.59	11499.2	8808.01	8770.57	47993.7	8633.33	11449.9	6503.81	19889.2	8793.25	21050.4	25079.1	11449	11996	26052.2	12957.5	18476.8	9918.54	14691.9	16806.9	12541.8	14149.9	22657.6	18575.8
POS	M144T377	144.082	376.972	6613.63	2677.75	5113.14	5843.32	4838.45	3999.82	4807.41	3925.88	7072.57	5330.41	1757.53	4791.18	2075.73	4179.75	2313.12	4676.56	2760.2	8753.57	2453.63	1801.29	2212.45	2703.84	1974.11	2579.1	2407.72	1973.86	2185.27	1717.09	1772.8	2279.37	1793.15	4579.44	2379.09	4038.17	3787.68	3750.1	4462.9	1803.22	3323.18	2229.53	2417.88	3897.58	4139.48	1838.31	4120.23	2431.07
POS	M144T259_2	144.1	259.449	8.25515e+06	7.41137e+06	1.00277e+07	6.10589e+06	1.10607e+06	7.45187e+06	5.96672e+06	9.64563e+06	1.52317e+07	3.80869e+06	487207	670478	5.20268e+06	4.99708e+06	2.89745e+06	857078	1.30647e+06	1.59479e+07	5.98368e+06	3.08994e+06	4.16498e+06	5.18243e+06	667076	7.82291e+06	2.13178e+06	6.19507e+06	7.3606e+06	617334	2.16392e+06	2.08228e+06	559817	725088	1.72262e+06	1.4184e+06	1.5352e+06	3.40055e+06	1.10842e+06	3.21344e+06	660109	3.96766e+06	6.57202e+06	3.64754e+06	1.29671e+06	797398	1.07976e+06	326661
POS	M144T291	144.099	290.654	113985	109710	113889	414321	148043	107315	114209	113122	223674	69011.8	62873.2	189542	114585	76340.4	67225.9	62604	101386	2.91411e+06	90261.1	102873	74770.9	83078.8	65176.3	108983	65576.9	92900.6	128074	74430.8	65697.2	98630.7	56004.9	81829.9	164344	49842.7	67055.9	100258	54646	83493.8	59971.5	69738.5	114239	80073.5	67716.1	188442	52959.2	57155.2
POS	M144T318	144.099	317.87	49265.8	40740.6	108280	39764.2	27525.2	48541.2	76726.7	46890.5	79770.1	24252	23764.2	24059.2	37351	42100.4	25666.4	17728.1	25582.7	90296.5	32579.9	39910.1	20358.4	24762.7	20629.6	36093.4	23063.2	31762.2	80578.7	17890.6	27261.8	19069.9	19703.4	22904.3	18847.2	20894.3	25473.3	27729.5	23464.5	30874.8	17654.2	26109.9	37029	25858.4	29347.4	20639.7	20417.2	17655.5
POS	M144T332	144.099	332.048	14829.3	37056.1	35447.9	23513.1	70703.1	83629.5	23718.3	36542	59668.1	22347	104177	23827.8	33609.2	74031.2	293879	115675	21215.8	60359.4	11618.2	10678.9	20569.7	58172.3	37813.9	23163.2	17083.4	21982.1	21697.8	11215.5	37052.9	19156.1	37522.9	14849.7	48151.2	29549	267683	37954.9	7141.83	29080.2	13052.7	114514	20144.8	52836.2	121649	81153.6	372818	31956.5
POS	M144T460	144.099	459.637	6895.24	5104.57	7238.26	12276	5066.32	6574.72	6083.54	6425.83	11920.6	4676.85	3552.65	3307.7	6090.03	7256.7	7693.76	3723.25	4155.75	11359.7	3792.78	4865.89	3478.95	3687.73	4292.41	6176.59	4227.89	4251.12	4121.83	4274.01	5567.56	5669.9	4566.92	3059.14	3838.11	4953.35	5099.36	6361.31	4923.87	4205	4016.3	4519.61	14006.7	5868.6	4202.81	4102.39	6163.36	3422.26
POS	M144T26	144.097	25.599	14096.5	5468.8	11616.6	12730	13143.7	12260.3	8460.36	6626.18	16627.4	9721.21	7567.35	11641.6	12932.5	13512	16017.7	7566.64	10426.8	11352.5	5163.39	5991.53	13108.4	5949.07	6029.38	5221.51	6213.68	3564.66	5209.64	6657.71	6093.31	13451.5	14688.2	3866.15	6940.22	12916.8	6299.3	14874.6	10541.2	9160.36	12911.4	6647.7	6342.25	3789.85	9754.83	14541.1	14756.9	13089.1
POS	M144T225	144.11	224.627	12216	12718.4	16714.8	17756.8	10718.6	7565.12	9951.43	12409.7	12653	6743.21	12152.9	7393.85	9991.51	7562.63	8404.66	12029.3	7638.05	5069.28	22425.9	10024.4	10079.6	8700.49	10820.3	12327.4	9670.75	6696.35	8673.77	10469.2	9787.52	12307.1	10531.5	5284.2	19842.1	11905	8844.85	9550.98	6217.82	9741.22	12718.3	8306.82	8928.92	4226.04	12111.1	11796.8	11005.5	10366.4
POS	M144T503	144.111	503.202	10240.6	12022.8	10003.4	7266.59	6379.86	6316.34	8452.64	10605.7	8513.33	5742.7	9789.56	6526.33	14559.5	11258.4	8586	13757.7	5763.01	6480.45	8560.75	10253.8	8817.55	7039.25	8151.3	9164.35	7323.75	4744.15	8239.01	7311.19	8173.2	9585.8	10143.9	4867.94	14266.4	7643.9	8220.58	13413.9	4740.57	6703.53	11796.7	8600.45	12619.6	9279.14	14048.1	10345.1	8555.47	9808.98
POS	M144T72	144.119	72.42	1217.24	5054.8	697.782	1328.82	8513.84	4853.97	3192.83	2956.48	3230.88	4016.86	8880.24	1434.52	3369.92	2204.74	3610.27	2176.11	1115.82	2353.92	4664.41	11118.1	2111.89	5671.47	1064.33	1209.51	1266.14	4559.1	5044.66	655.327	2046.44	2665.5	639.561	508.544	2213.94	7213.41	2178.97	3841.41	2375.88	4541.87	611.395	828.352	743.594	5552.46	2249.91	9183.1	9108.98	2020.13
POS	M144T35	144.136	34.78	7810.63	9450.63	17093.4	13485.2	6441.33	9091.39	4186.6	15245.5	9016.99	9405.72	11157.6	12896.1	13403.5	14592	4935.12	14109.6	12894.5	11551.4	8809.28	12339.1	12585	11872.5	13395.3	13156.8	13271	9634.62	10122.3	12224.6	14429.5	971.833	12425.6	10174.5	14140.4	13844.1	14690.9	4734.48	10997.7	14963.6	15440.4	9893.09	14333.2	12730.6	13737.7	14138.4	13490.9	14587.2
POS	M144T157	144.147	156.787	3331.22	1068.9	857.22	1342.35	1586.33	1011.54	1306.27	503.061	1747.04	912.428	1595.25	2633.73	1726.59	1870.07	1491.21	1806.84	1877.98	1374.98	1477.46	1304.34	1196.88	1378.73	1738.88	1727.35	1621.26	2095.48	1049.44	1689.08	1346.38	1165.7	1552.25	1451.79	1530.19	5944.33	1716.63	1496.23	1830.72	1657.42	1818.71	1146.39	1448	1050.66	2007.94	2435.71	1224.12	1575.22
POS	M144T25	144.174	24.928	1579.69	1704.54	707.99	1870.26	1864.2	699.524	714.534	1798.71	2063.02	832.549	2061.15	1894.19	716.946	931.163	1171.46	855.291	807.392	628.299	1334.27	933.487	1926.38	1729.73	922.551	1621.85	838.914	1587.86	761.495	766.124	1945.65	1015.26	956.561	648.976	776.217	697.649	810.596	1028.34	1591.32	914.473	2085.51	740.616	1149.4	804.004	1998.78	2024.22	779.612	768.594
POS	M145T352_1	144.545	351.965	2384.78	2440.21	2182.58	1703.59	2077.91	2681.47	2305.49	2164.25	2012.46	1682.43	1319.89	2919.86	858.399	2745.27	771.334	1538.62	1815.06	2948.58	2350.4	1900.12	1753.38	1997.84	2289.72	2865.19	1533.42	2075.51	2008.19	2448.24	1107.73	1470.28	2191.93	1644.56	1743.1	1970.03	2014.23	2750.21	2072.12	2464.81	1278.89	856.066	2482.34	1930.57	1235.78	1594.92	1094.71	1812.03
POS	M145T259	144.668	258.967	2206.7	1745.11	2219.49	1109.62	204.256	3090.93	902.072	2616.01	3874.09	934.924	92.9636	131.915	1061.32	776.996	526.549	166.997	473.199	4645.23	1208.99	744.042	1254.75	1263.98	126.024	3975.62	530.203	1730.83	2564.28	100.896	528.85	705.994	155.779	188.719	415.405	252.911	245.124	833.35	376.196	840.721	206.345	1000.42	1721.27	1097.77	264.07	262.554	230.711	46.3957
POS	M145T345	144.925	345.108	97217.2	35895.6	76366.3	95490.5	98755.3	97075.6	85870.4	88848.3	78055.5	75428.5	94986	104440	136849	128013	102410	99463.2	86932.5	95186.2	86962.8	96312.5	91025.1	68067.2	88311.3	97390.8	82184.8	89604.6	98974.5	116838	89839.6	100457	74210.8	110716	45959.2	81068.2	97200.1	123783	119121	95457	92606.9	107660	119972	97433.1	116064	109987	94193.8	96009
POS	M145T358	144.925	358.4	56277.5	17943.5	40391	46500.5	45296.2	53015.4	43827.8	44434.7	40541.8	38768.3	47479.9	56691.8	55627.8	60045.9	50683.7	54623.6	47938.3	42230.2	53134.8	50965.6	47680.7	43875.8	49412.7	57724.2	49882.4	56809.2	57438.6	61933.7	48908.6	56466.3	47175.5	59617.3	20491	48139.1	50769.6	63559.3	76611.5	51493.8	47950.2	54591.6	62314.6	57974.2	60639.4	60334.1	54998.3	48807.4
POS	M145T352_2	144.983	351.709	615674	611934	610968	635159	729701	638569	679365	688716	642334	626986	632907	660009	795431	805586	688541	682116	644282	664707	645007	645215	630522	493657	574114	631003	609385	590754	643656	667431	609722	614093	585605	644027	685821	610045	690991	724717	643578	647902	629302	641743	761705	661220	635204	674176	655940	689470
POS	M145T28_1	144.998	28.248	3400.81	786.543	1390.74	1128.11	175.655	2594.23	2158.92	932.768	3621.84	4355.98	455.406	708.817	1022.13	906.526	43.1649	235.096	712.768	939.201	277.373	31.4714	300.764	233.46	460.091	1229.14	284.728	1123.62	70.4364	72.032	375.164	65.4433	134.648	611.991	214.854	10142.9	3332.12	230.586	2371.3	794.264	217.471	273.254	2309.01	9206.96	2849.31	4078.08	4102.72	4504.6
POS	M145T233	145.029	233.165	2632.15	2538.96	2867.02	2077.44	2890.41	7056.86	20412.9	7667.18	3074.07	1367.53	2335.07	1706.4	34086.9	2768.66	1493.19	1334.02	2024.59	1699.06	1991.68	16209	2832.18	1247.85	2280.45	4768.06	3413.77	2156.74	1890.86	1982.45	2035.87	5664.67	2910.76	1909.94	25115.2	2802.84	2262.26	1770.7	13866.3	3099.71	11933.4	7200.55	7720.39	2497.86	3485.12	28348.4	2843.26	1697.58
POS	M145T182_1	145.029	181.773	1230.61	2484.98	629.992	871.044	1120.53	1353.89	1405.09	1159.77	617.213	1462.71	1417.6	1652.61	1657.61	1959.45	1036.96	1264.32	1250.26	729.087	1640.38	1477.85	1511.34	728.992	616.454	1339.53	1369.39	1474.28	1449.45	990.888	1767.59	1474.03	810.397	1955.08	2957.13	893.27	1415.57	1315.71	1158.95	2017.44	1720.57	1686.82	1055.27	1271.99	1540.99	1817.54	1237.02	1549.53
POS	M145T291	145.047	290.741	267361	264088	178444	180311	354451	271174	332529	244787	245945	234956	305050	341346	412596	223921	246727	254722	490073	191572	294286	390766	356729	270841	292939	288146	293170	329056	458312	354868	279745	354734	265829	320067	252798	185364	262299	330244	169293	369583	262192	274330	370853	294646	277376	304126	212742	290286
POS	M145T198	145.047	198.375	9574.24	755.294	13759.3	4812.58	15050.1	22492.2	7749.02	17195.8	4771.13	1431.03	377.672	4061.48	9782.75	3536.92	5608.06	4802.03	3483.33	3180.53	1057.17	642.051	608.613	480.891	615.02	604.472	842.668	718.021	526.276	787.255	518.48	683.436	505.361	4774.9	314.916	2723.3	4282.83	4999.91	4839.13	574.184	3758.06	1047.3	459.156	5347.65	5878.62	689.046	5742.07	636.956
POS	M145T41	145.048	41.454	13686.6	7663.47	13488.8	14679.6	1763.51	4931	2006.94	1246.64	9204.31	2167.14	8157.06	12957.6	23386.8	17481.2	8492.54	8844.44	8206.5	8566.84	6839.13	7940.6	9700.09	6242.93	8671.62	1971.88	7166.93	12218.8	7747.71	8995.16	16277.2	2647.52	8965.91	14050.9	11144	9544.67	8432.72	8782.89	12846.3	10428	8235.56	46790.8	9801.74	9279.65	87473.8	31500.1	12267.4	11867
POS	M145T324	145.059	323.976	34435.9	49193.9	49546.2	34815.4	25625.5	20678.2	37880.2	47342.6	43528.7	35365.4	40945.7	27597	22822.5	27568.2	39224.3	24901.4	33846.6	28860.3	25762.4	38893.9	37243	47897.8	47289.8	30126.6	39874.3	26877.7	28884.5	28389.5	41062.2	32242	45338.2	20403.1	76008.3	46024.3	39131.3	21744.4	16672.6	33673	41554.1	28636.8	29123.2	22432.1	23054.7	28494.9	37980.7	36477.7
POS	M145T147	145.074	147.334	139119	115808	96605.2	142039	145702	155124	136161	159513	128487	86765.7	152078	153064	131911	123612	129019	162065	99635.4	129908	162253	90936.2	107463	110636	110558	118388	121560	134680	130461	115181	128153	119335	147891	97753.8	179020	134990	114942	119498	105980	96390.1	125420	122895	143094	127862	151390	119177	145122	132011
POS	M145T240	145.074	240.084	18067.9	17918.9	19430.9	21890.2	21996.2	21403.3	22606.8	22531.8	21211	17582.3	23429	23677	25948.3	17495.4	20549	25123.9	17807.7	17708.8	20138.1	20762	21312.7	20415.4	20133.7	32922.4	19566.9	22992.5	19801.4	15878.5	21388.3	21977.6	18121	16179.1	18710.9	21844.8	21598.9	22058.2	20744.7	15693.7	20374.8	24411.1	25012.8	22849	22190.4	20951.5	22634.7	20543.1
POS	M145T182_2	145.081	182.41	1231.4	1362.42	1721.21	2325.01	2104.64	1796.74	1773.74	7240.91	2067.65	1710.05	1163.72	2033.38	3947.53	1670.05	1520.07	2601.45	1560.16	1585.11	7566.17	1264.79	1606.32	2076.23	7834.75	1563.62	1712.86	1627.59	2151.88	1550.56	1621.97	2201.08	1132.14	1850.2	2124.95	1777.44	1458.07	3208.42	2046.86	1876.43	1072.08	1699.2	2002.22	2981.4	3890.19	1426.36	1475.89	1467.44
POS	M145T290	145.094	289.681	419759	32142.1	323060	581554	281416	448423	410072	336910	242459	296024	17330.3	264994	35298	301185	56855.6	252820	179176	231488	48930.2	39669	24634	22052.5	41487.1	30632	72365.3	21902.9	24149.9	24220.7	42207.6	38540.7	14647.1	293212	19276.9	262519	296900	267242	372549	24089.5	216028	51597.6	25329.2	249614	389846	21988.9	287836	106655
POS	M145T42	145.098	42.2	8645.92	4308.87	10512.7	13777.6	23114.4	11413	23595.9	15965.3	4970.37	7286.73	6392.95	28277.4	23169.7	15203.9	17970.9	9841.92	11443.2	16095.8	3697.78	3289.05	18413.8	12224.1	8587.29	3615.72	15317.7	12116	10043	9156.21	13486	5653.13	8404.44	24561	7963.09	4660.84	17454.2	4928.93	12674.1	17394.6	4130.29	52818.3	20237.6	21707.8	89411.4	35809.7	8621.15	7714.07
POS	M145T377	145.094	377.015	19484.1	4249.55	13031.5	17710.6	14444.3	15343.9	18820.9	9985.59	12062.5	12500.3	4406.39	13984.5	3435.27	11048.6	8093.56	9990.05	9046.86	9159.17	5571.51	4936.78	3535.66	4216.13	5263.28	3780.03	11039.5	2545.41	4959.41	4523.25	5416.57	5299.3	3425.87	12656.8	4361.52	11120.7	15726.1	11822.2	13578.7	4247.47	7727.56	5403.12	3739.52	9855.69	13882.8	2856.12	11254.3	7015.5
POS	M145T260	145.103	259.56	549957	451968	650671	393399	79033.8	530738	397689	637969	985244	249218	41938.3	51072.2	330864	341354	192137	64463.8	89604.4	995885	397772	214770	288728	349001	48585.5	509803	148867	413853	465665	36553	156933	146680	42067.5	53268.4	127453	105762	108880	225448	65046.9	212382	49746.6	260799	430117	257520	95536.6	60810.6	92755.1	32398.9
POS	M145T306	145.131	305.976	4109.16	2100.18	14500.8	7803.22	2977.72	1657.57	17444.2	1205.91	1280.87	7783.47	8494.3	2364.02	964.378	5397.93	1422.17	2059.82	3744.18	2617.2	2158.25	3961.39	8931.58	1905.44	2342.89	18051.9	10898.6	3236.33	2201.91	10033.9	1858.35	7053.76	8385.55	2539.91	1387.81	3535.23	2800.97	864.109	7673.17	4452.27	2376.04	5213.13	14395.2	5980.13	2842.55	8723.83	9259.93	1957.83
POS	M145T411	145.131	410.774	1172.98	11140.5	17967.8	20495.8	1122.95	5833.63	1821.48	980.224	16162.7	6281.38	17198.5	2661.19	15452.1	14887.1	19897.8	17271.2	2649.22	3623.81	13772.7	15686.2	17258.1	14197.2	18760.7	14419.3	16607.3	3432.88	15971.3	18709.4	17017.5	19073.6	18685	5691.28	14561.1	14905.7	19371.2	18356.8	2686.96	17106.8	16710.9	16074.9	14969.9	1784.3	24793.5	16592.6	17108.2	15706.9
POS	M145T28_2	145.138	28.3725	4127.91	3863.13	4690.75	4398.8	4266.78	1964.3	1453.28	4499.97	832.48	1470.43	2003.34	2992.94	3797.57	2359.84	1834.99	1366.37	3898.82	3901.18	4105.99	4002.18	4109.49	4073.06	1201.64	4081.52	4327.29	971.955	633.921	4945.69	1105.73	1108.04	1351.43	4523.68	3796.68	1548.67	3327.35	1058.69	3052.89	1533.44	1294.27	1500.48	1274.52	2844.33	4241.57	906.002	3711.14	4981.57
POS	M146T239_1	145.618	239.457	889.825	904.699	839.728	764.061	535.831	1022.51	841.669	604.639	760.88	711.77	963.032	983.472	952.497	999.922	645.425	803.764	375.686	605.134	467.862	411.132	940.838	475.839	578.406	761.108	804.507	374.38	834.376	830.865	713.248	727.406	862.482	1025	1208.57	829.923	579.147	1065.05	705.956	569.17	874.87	1017.31	736.89	875.079	1040.31	828.45	916.06	958.269
POS	M146T360_1	145.676	359.745	2374.41	2299.87	1708.86	1410.75	2363.24	2474.86	1682.58	2075.8	2417.88	2650.59	2061.38	2434.76	2175.11	2036.77	2781.1	2130.72	3305.57	2190.65	1738.33	1718.42	2440.45	1750.34	2358.19	2690.61	2565.39	804.955	2176.34	2631.41	2581.14	2022.93	2095.94	2517.16	2208.26	1850.85	3010.78	2245.85	2367.13	2200.87	2335.9	1677.18	2888.12	2028.4	2202.99	3136.27	2795.98	1565.34
POS	M146T346	145.928	345.62	1388.47	587.426	734.975	1043.94	954.884	1081.68	765.755	1194.75	557.861	609.927	670.793	1226.83	1579.52	1553.19	1492.52	723.867	1152.19	1149.95	906.32	686.742	943.869	464.794	1169.55	1268.52	1297.16	1375.31	1060.18	1242.42	898.612	1253.7	738.112	735.664	723.468	557.29	833.231	1645.73	1875.6	866.42	915.724	1347.81	1218.63	622.206	1316.31	1134.37	1480.42	786.475
POS	M146T352	145.986	351.554	14641.1	12841.7	17126.8	16577.7	19209.7	16431	15347.5	16399.2	15646.5	15503.8	17918.4	16082.3	19899.5	21379.2	16081.3	15492.8	16935.2	15402.4	16992.2	16903.3	15086.7	11952.1	13452	15436.2	14362.7	14129.5	14668.4	17198.6	14155.3	13860	14203.6	15702.3	14879.3	16629.8	18500.6	17402.9	16528.3	14008.1	15879.7	17017.3	18117.8	15744.9	15009.9	17593.6	14660.6	15557.1
POS	M146T216	146.025	215.648	61093.5	188416	26842	226631	70355.8	150204	142430	47086.2	37491.1	206979	280226	260506	219123	491448	85181.9	204176	152209	97129.8	232781	256914	256940	218794	236986	178234	257015	157002	254541	122070	243472	82730.6	117762	130585	403996	135780	70198.1	95623.2	74133	129230	218773	181117	127982	140270	132843	163077	173920	250224
POS	M146T39	146.024	38.796	22948.7	10752.1	12034.2	10574.8	12637.7	9455.37	12808.4	9765.09	7981.66	4869.71	332.175	9523.35	2449.13	2968.78	2569.37	2647.6	2335.37	2795.71	78.3123	180.053	164.432	101.676	0	112.793	119.999	67.776	0	0	67.8039	603.511	1003.72	1890.07	308.343	1815.34	2511.66	2184.65	4785.61	457.31	2311.11	54.9889	0	2772.12	3258.15	63.9122	3548.08	120.146
POS	M146T376	146.043	376.445	3769.4	6359.42	1603.81	4208.85	3711.71	1462.83	1770.07	2512.85	1804.59	1458.49	3699.78	5023.88	4021.13	4400.44	4191.93	4215.85	897.222	931.069	4584.43	3885.7	4067.48	3803.06	2918.32	3911	4963.26	2351.15	3352.57	354.086	3665.86	2134.65	3200.91	1765.13	4089.52	3479.91	2983.33	3506.36	3338.29	3594.29	3898.62	4374.49	4397.7	3990.35	3435.65	3757.43	3408.34	2903.28
POS	M146T291	146.05	290.744	16201.4	14817.7	12333.4	10484.7	21672.4	17921.8	11637.7	13252.2	10431.3	6267.52	14685.8	18440.7	21189.9	11191.6	14575.8	12168.9	27621.3	11856.6	16729.9	23295.6	18611.2	13993	15474.1	15536.7	14731.6	16123.1	26976	21189.7	13930.6	15604.1	14245.8	15274.1	12627.5	8809.59	12642.1	18888.4	176313	18387.8	16613.6	12468.8	14185.2	14107.8	12876.2	13394.7	11885.6	15581.6
POS	M146T44	146.057	43.7495	56618.7	18389.3	86424.8	33162.6	26067.8	29783.3	70330.2	45872.5	93884.6	38038.4	32261.8	31609.3	32355.6	29350.8	62617.5	26633.2	54071.6	53048	43730	32136.6	98548.1	37723.3	26242.9	44633.1	24860.7	41483.8	25983.5	85958.2	32407.2	29707.3	81758.1	41572.7	107652	106091	40824	63413.4	52705.8	53612.8	26971.5	26969.9	41848.4	47076.7	42353	43242.8	34974.8	46719.2
POS	M146T239_2	146.058	239.36	287680	268689	272340	319295	312875	263081	219947	298737	249031	211809	315914	310160	387076	274820	240835	318690	246583	224375	271836	238933	289227	203760	216965	222101	274010	221629	227550	254268	272173	238958	288659	304030	349000	257844	250017	305435	236885	263807	259454	334696	378012	268274	267561	305048	260511	311389
POS	M146T182	146.057	182.404	17509.1	20491.8	9687.19	52948.4	26851.4	14600.3	16824.7	24990.6	30499	50309.7	30626.3	33421.3	71972.8	21869.3	18540.4	52765.4	39483.5	23080.7	8882.42	9463.41	15751	30472.8	57389.4	18928.1	33919.8	4286.39	46472.9	15894.7	17692.6	41857.4	26292	36923.2	36183.6	18342.9	18525.2	60033.4	19033.5	29186	8904.24	14080	25808.6	46711.3	68405.8	21293.7	24287.7	6300.72
POS	M146T78	146.057	77.512	85933	21509.1	66881	151108	63380.1	41888.4	48551.7	55505.8	52102.3	25479.6	55378.8	67216.5	49456.8	49409.5	103953	91830.3	32290.7	33208.1	36777.1	102125	72937.7	87626.7	46630.9	68222	31733.4	46116.1	22106.8	43659.1	76567.6	63377.3	55742.3	39430.2	26323.3	106564	89162.9	69356.4	59827	77041.8	48418	46085.7	100481	46368.6	127727	65220.2	41024.8	106852
POS	M146T324_1	146.061	323.931	7896.46	8715.19	2494.46	19259.8	15984.9	4417.77	1989.93	2706.78	29222.4	2713.8	16431.4	1648.56	1655.11	71147.4	79972.5	49745.7	2109.74	50944.3	10229.9	5027.37	2294.12	2799.77	2708.81	2107.84	8010.68	12666	6505.52	12861.6	11404.8	1999.74	2851.91	3719.11	3995.92	41523.5	57530.9	22448.9	1204.53	1811.9	2548.25	4065.64	9147.05	1574.56	17306.4	1389.47	15084.1	1987.81
POS	M146T290_1	146.079	289.683	226099	54203.8	76165.3	313733	311727	352808	756362	438520	1.06539e+06	1.03636e+06	182006	216815	165098	422907	69550.3	373730	344468	66865.6	46353.1	305329	34538.3	158170	182367	194030	116165	41186.7	370186	62637.4	175841	270787	163493	228532	306076	502103	127455	122488	248234	172751	33447.8	367421	87259.4	106436	226995	223690	67696.1	123082
POS	M146T379	146.079	379.017	12691.5	5487.89	17283.4	10717.3	18640.3	14681.3	17765.8	19543.7	22969.3	17566.9	10633.7	12365.4	13571.1	21464.9	17704.4	13264.3	15663.9	17278.4	12541	13092.6	8688.09	6321.73	10792.3	10957.5	9581.89	8677.8	14446.6	10673.6	8777.98	9255.97	10388.8	11694.1	5325.08	14451.1	11190.7	13427.1	16063.9	9508.68	11458.8	13365.6	12389.7	11168.1	12880.7	16874.4	10431.1	7795.62
POS	M146T324_2	146.079	323.711	9922.41	9289.93	15591.4	45473.3	75220.5	18966.7	23240.7	19872.5	87579.5	19448.5	15356.4	8228.31	30407.8	70382.7	80028.9	52043.6	9297.21	48157.8	17558.2	26818.3	18028.4	22253.5	31169	19540.2	9018.22	13047.1	45342.8	14679	11772	12036	15676	31555	11088.6	43561.3	58497.7	23231	28995.6	8562.8	9299.85	12627	9440.2	18226.3	117621	25306.8	15595.1	39120.4
POS	M146T270	146.078	269.582	6390.44	6445.52	14448.3	6073.13	11350.7	11560.6	12413	9478.71	19669	8957.61	7220.43	8646.23	15827.4	13106.5	7886.22	10013.9	5632.28	18566.2	12156.4	7425.54	5358.39	8019.03	7114.57	9291.47	8441.03	11262.1	8481.93	10532.5	12373.1	10346.8	8861.19	10409	5353.21	9581.02	12130.2	10842.7	9225.65	7800.43	3880.67	8068.36	14764.6	6804.03	7915.13	11323.6	5899.68	10712.4
POS	M146T244	146.078	243.731	105539	91594	98199.8	117587	138255	159007	100919	112757	97585	104261	6078.44	126862	174333	112458	80921.6	151158	89804	97408.7	2658.19	86088.8	4587.88	12362.2	77850.4	5747.59	4264.03	8703.58	5456.44	134422	14847.9	5223.98	87300.7	125938	118587	80946.1	96557.8	105823	116901	121247	85850.3	13910.3	16501.9	144186	140121	7676.71	103488	120220
POS	M146T46	146.078	46.123	67840.2	24314.5	64355	45537.8	35213.5	45683.8	81232.5	57092.4	70148.7	1906.13	52729.8	43710.3	53840.9	782.167	2490.67	6379.19	60766.1	34294.9	1798.2	51713.6	3792.08	4215.99	3177.42	3275.66	4992.31	2953.39	37313	46985	50036.6	41102.6	3324.38	45063.6	63329.2	69929.8	55674.4	73386.3	3796.65	76092.1	3434.81	40865.8	66287.3	63151.4	63314.5	67662.6	53136	71904.7
POS	M146T136	146.078	135.928	23331.5	51615.9	32592.5	19212.2	16739.1	41137.9	56585.7	21145.8	83727.4	15918.3	19326.4	20598.8	22494.4	24442.7	18790	17687.4	15085.2	60143.4	15955.1	15121.8	18798.4	14384.3	16617.6	20102.4	14226.6	21090.1	19573.1	18024.6	18696.1	15273.3	16878.3	16188.5	2377.4	22103.9	21034.7	15837.5	22406.4	18703	15884.8	17335.2	24824.6	19531.6	20512.2	19949.3	18469.5	18637.5
POS	M146T341	146.09	340.591	2709.68	3599.39	9092.09	5533.2	7793.54	5276.43	6801.64	5734.67	6423.98	4887.71	4935.29	3781.21	3324.47	8670.74	4512.8	4559.41	3541.02	4764.19	4973.8	2810.94	2733.9	4381.13	5044.15	9212.36	4881.98	4171.96	4167.21	3922.78	3226.62	4055.29	5593.1	2876.09	9129.35	7168.55	5831.22	6752.37	4893.28	2294.86	4295.66	2193.5	4015.65	4419.16	7099.26	4918.84	5770.4	2838.41
POS	M146T290_2	146.098	290.287	3543.59	133.952	3496.88	3040.89	1909.86	3723.57	2283.81	72269.4	1940.09	168091	28672.4	2358.76	26042.4	2112.12	11380.7	63229	426.273	2822.55	417.977	48551.9	5855.89	26365	29969.3	32354.4	18857.6	6641.03	60169	10336	28974.5	36206.2	26519.1	2190.71	51421.3	1514.87	3325.29	2337.15	3425.45	28420.8	2655.49	60114.4	13820.4	15825.3	2162.89	37598.1	3056.83	930.621
POS	M146T260	146.104	259.539	40251.9	36186.8	48450.7	27095.3	3815.7	35082.7	26653.1	45503.4	73086.7	19870.7	3048.41	2187.48	22643.9	24721.7	14046.9	5226.07	7317.77	77171.6	27922.6	15172	22130.3	25498.6	3294.23	36525.5	10468.1	30491	34996	1801.48	10097.6	10766.7	3152.37	11718.7	8109.57	10101.7	7280.99	17759	3065.41	16453.3	3303.22	19773.2	31674.6	16774.9	8004.82	9172.4	4869.14	1686.87
POS	M146T212	146.114	211.875	2021.23	1869.01	2419.16	2048.17	2388.48	2262.4	1845.83	2171.73	3179.36	1739.6	804.382	1220.69	3710.44	3123.1	1441.34	1987.01	1888.09	3496.62	1638.54	2404.12	1799	1185.96	4786.96	1688.63	1793.27	1059.97	2516.04	1659.53	1984.03	1089.35	2406.62	2431.83	2313.92	1770.77	2254.38	4382.13	6869.05	3148.44	2332.69	1126.18	3062.93	3436.93	3214.08	2734.04	1503.04	525.948
POS	M146T360_2	146.116	359.592	921927	980959	686123	833519	910008	997070	654004	742681	709501	1.12972e+06	870597	938023	1.12128e+06	932354	1.03161e+06	873330	1.38979e+06	858823	816518	830671	915299	661963	827647	943718	993195	663416	1.05181e+06	1.03433e+06	1.02237e+06	875499	786414	1.07207e+06	751028	628958	1.01755e+06	820609	952259	1.05269e+06	902022	889702	1.04818e+06	895713	1.01429e+06	1.14062e+06	1.1117e+06	691620
POS	M146T317	146.115	317.371	14153.3	21334.4	10758	109365	122691	35360.7	29622.4	10255.8	5728.93	20794.8	111584	16294.7	41779.7	19622.4	17441.2	26361.6	57004.2	109863	18324.3	16778.6	19147.5	36605.8	28168	23827.2	23144.4	36039.1	20739.9	16472.2	62702.4	29108.6	90193	14296.7	85440.3	36323	20351.7	43127	22284.6	140024	11146.5	16813.8	25174.5	230558	303615	34609.2	35695.6	16275.9
POS	M146T232	146.115	232.055	7666.27	134068	10633.1	7891.95	41118.6	10460.7	10750	7205.16	4346.73	6239.48	94253.2	5991.31	11207.8	16122	12088.9	6383.78	6579.87	14141.2	5154.43	4293.78	151545	4410.24	5245.4	8124.3	149216	2958.62	101754	5758.25	8100.31	3959.42	190644	9431.14	6105.62	6981.45	12554.6	15117.2	5504.76	17435.7	152215	5563.73	8696.3	47059.9	13085.7	7397.75	9360.33	4478.15
POS	M146T48	146.151	47.656	8920.93	3605.95	7340.19	6750.27	300.136	7181.77	223.737	7574.88	8835.28	7038.77	8036.19	4441.9	5861.7	470.26	3106.99	5068	1453.1	3855.58	6129.13	8538.12	792.995	378.728	12658.2	362.561	1528.32	880.624	19130.3	11516.6	5043.03	6162.77	10009.5	6870.03	8875.86	12430.4	10044.5	7888.28	5943.98	185.556	51888.2	12076.8	9573.06	7931.75	13828.8	10852	8668.65	11059
POS	M146T25	146.17	25.355	744.095	803.1	683.292	809.173	893.841	711.305	709.3	750.333	886.29	928.661	796.625	743.845	796.783	791.953	926.246	875.071	804.838	845.015	959.092	951.224	870.858	708.331	737.607	621.894	774.617	829.259	694.775	936.662	755.526	860.244	809.374	939.332	708.664	754.423	867.581	884.414	860.726	870.337	908.918	637.491	984.857	703.776	812.864	765.356	766.106	802.958
POS	M147T359_1	146.63	358.82	1319.31	1095.43	1611.93	1161.81	1221.87	1360.99	1213.65	1286.18	1663.72	2337.2	1369.39	1426.01	1723.27	1288.28	1587.75	1795	1538.8	797.862	1555.06	1061.13	1643.25	1535.1	830.672	1329.57	1448.42	1576.96	1627.39	1592.13	741.748	765.163	1534.42	1247.35	1550.2	1446.57	1340.43	1022.24	1605.76	1418.28	1299.03	1432.3	1497.45	1375.99	1570.77	1439.41	1863.11	1658.36
POS	M147T346	146.923	345.623	7865.4	2799.91	6342.49	9463.18	9388.92	7869.57	5979.1	8436.53	6003.22	6155.86	8071.57	9406.13	10531.4	10686.4	8553.15	8304.59	8064.57	6972.17	7420.32	7495.77	7467.85	5185.7	6555.15	8273.21	7177	7368.68	8349.41	9282.34	7249.8	9946.26	7093.46	8890.3	4595.62	6116.22	8442.58	10256.4	10243.3	8920.01	7669.76	7438.01	9893.16	6036.26	11381.7	9692.58	7850.4	8068.83
POS	M147T352	146.986	351.664	3840.94	4292.8	4149.84	4154.32	5822.15	4882.76	4213.4	5233.14	4649.59	4166.73	4646.8	4643.69	4607.04	5440.33	4386.91	2085.65	5241.97	5365.74	5623.63	4527.63	4354.61	3836.9	4504.6	4363.39	4517.89	3962.55	4316.43	5702.69	4720.41	5079.25	4863.93	4335.9	4147.38	2594.05	4978.74	4283.63	5194.74	3136.55	4721.27	4647.14	4301.99	4774.84	5019.09	5350.97	4933.31	5677.01
POS	M147T28_1	146.996	28.225	1815.17	237.802	662.667	792.542	72.5247	1280.48	948.493	676.521	1713.86	2168.07	304.634	271.013	518.662	424.495	34.1916	124.086	0	14.88	96.0475	54.4492	112.248	129.258	172.719	505.254	116.918	661.47	101.764	33.4579	175.015	80.3612	44.9626	327.044	56.5154	4492.07	1705.71	178.21	978.547	420.411	70.2245	58.0951	841.73	4360.89	1410.59	2022.78	1831.38	2069.38
POS	M147T318	147.02	317.768	51023.7	43622.7	68541.9	62680.9	19262.1	63011.3	84459.2	52829.8	113879	43026.2	69362.9	54589.6	82800.2	82521.3	51863.2	61603.4	40974.7	46355.6	39255.2	67759.8	67133.4	43000.2	84141.1	112256	63314.3	20697.8	15322.2	54661.1	87409.4	23614.8	21402.8	28607.2	130799	64234.1	100044	51244.2	18402.2	63158.9	64286.7	25368.2	103739	60985.1	101040	111278	133018	121785
POS	M147T256	147.02	255.717	3881.22	2612.92	3364.02	3349.25	2002.2	4932.36	4873.47	4046.12	3475.19	6054.18	4719.36	4130.86	3920.68	2916.43	2971.49	3800.74	3496.87	4466.34	5688.34	5482.77	4120.41	3517.06	4892.58	4718.51	2766.12	3852.41	960.729	3942.76	3327.4	1683.06	2032.61	3442.98	6817.36	3224.36	3466.07	2581.8	3683.22	5382.45	5573.27	3359.86	3905.41	3525.02	3327.94	5352.72	3254.83	3995.16
POS	M147T216	147.027	215.668	3508.38	10642.5	1502.56	12700.3	4832.38	8139.79	8129.92	2899.16	1953.38	11566.4	15501.4	13772.6	12433.2	26387.5	5123.82	12507.8	8924	5336.81	14390.1	14720.7	15035.3	13152.2	12661.2	10293.8	15207.9	8999.84	14703.7	6075.49	13368.9	5036.9	6986.84	7734.38	21754.9	7931.17	4068.6	6152.95	4911.81	8054.07	13516	10375.2	7716.02	8820.96	8160.78	10132.6	10124.9	13774.4
POS	M147T282	147.042	282.27	80630.3	81111.5	82505.3	85153.4	94076	104065	74808.5	85920.4	76337	85840.3	89404.9	90346.2	129466	86215.8	74109.3	85455.4	83473.5	84516.5	96856.2	80308	83565.6	75224.2	85178.8	80724.8	85056.1	95457	81971	82594	83045.1	76863.8	78430.2	85929.1	101443	79114.1	72747.4	95882.3	95816.5	79250	77448.4	81203.6	119594	94405.8	85438.9	80778.2	79196.4	77463.2
POS	M147T304	147.045	304.198	11245.8	13222.5	14323.4	15363.7	9385.41	18814	37767.2	10012.4	15901.6	14515.2	20550.1	13993.4	21298.8	18773.7	9289.98	8086.85	20536.1	11531.1	11892.7	9283.88	8809.1	7277.37	17737.1	18357.6	30287.5	7730.23	38975.8	14482.2	14565.3	8809.03	17125	13993.2	27413.3	29986	11440.1	18003.1	17958.1	13564.9	11975.2	13476.7	12719.6	8600.19	17116.4	24430.5	15053.9	15191.3
POS	M147T42	147.052	41.5	66891.7	15068.6	66655.1	43344.3	45876	40816.4	66443	46346.2	47775.1	47913.4	37390.2	14610.5	67033.1	48930.7	19601.2	22097.7	36704.3	34987.5	28028.7	20254.3	30768.5	21318	26687	49846.9	30550.1	24072.2	21375.5	55734.4	47261.5	46057.2	44169.9	16486.9	20660.9	26222.3	15283.1	18581.4	30907.8	37320.3	28878.8	25904.3	35880.9	32252.7	45825.8	49675.3	42285.8	29520.9
POS	M147T239	147.061	239.263	33342.8	23689	33729.3	36401.7	33485.7	28872.1	30435.1	31922.9	25994.3	26007.3	30082	35456.3	41942	33802.7	33854.7	38127	26351.1	32402.3	29434.3	23586.5	26786.9	19801.5	21646.8	21459.7	25494	20980.4	21720.1	26877.4	26789.1	23727.7	26850.9	44743.7	31792.7	35662.3	29479.5	40978.6	28615.6	24775.7	28146.9	32011.2	35304.9	34628.7	40314.1	30170	31298.4	31589.6
POS	M147T53	147.062	53.007	54746.6	101063	87926.8	51015.6	69469.6	72896.8	71192.2	31439.4	101858	51623.6	18189.3	59890.8	21349.3	24335.2	29530	28340.1	17400.7	21145.2	14503.1	12966.5	13227.8	9574.03	10831.4	16712.5	13601.1	10106.7	12622	16066.7	16446.4	14340.8	15843.8	22884.2	13824.8	30464.6	16749.6	30411.5	42645.5	13532.8	17158.3	14065.3	17269.5	20415.2	25285.1	19062.3	27826	16686.2
POS	M147T359_2	147.074	358.864	319744	374002	337489	319019	325878	375356	285098	343943	337247	679219	350648	318708	254948	203942	269452	294710	330062	344782	425370	359550	296025	362379	357176	312339	361138	826564	348320	310229	341888	286296	379892	486857	352921	330164	303504	225338	399190	322329	348546	389335	312909	393950	292179	303514	276119	289533
POS	M147T379	147.074	378.741	212540	145536	336909	167212	318575	280973	188611	335006	349647	165461	237116	274965	306954	147592	321520	223504	275755	281901	279201	266562	187088	179550	205448	243509	216065	251742	288578	213986	212324	204364	220989	270047	150530	166878	228143	231327	186465	202379	240361	248644	275450	256367	236464	333676	196681	120971
POS	M147T26	147.071	25.637	2758.61	2117.92	2581.36	547.612	2347.5	865.831	1002.57	3390.53	961.985	1940.15	2134.46	2115.01	2033.55	2620.8	2534.94	2519.43	1898.35	1971.03	3626.74	1861.88	2088.36	2668.84	2215.94	965.642	2040.84	1866.82	2405.63	1618.51	3631.47	1205.05	2039.13	2552.34	2946.63	3719.66	1968.76	2676.66	2162.74	2159.98	622.317	2357.75	2023.54	2135.66	1465.84	2152.32	2857.5	2359.26
POS	M147T209	147.074	208.66	26909.8	10619	24227.9	35294.2	18261.1	14708.3	33056	23656.3	14098.8	44961.2	26101	10333.8	11063.9	24354.7	9110.4	8583.32	40122.2	27431.7	29671.1	7821.55	11806.9	8204.25	18256	47585	26635.8	7230.64	26786.9	45493.5	29261.2	32693.9	21106.1	13303.9	14871.8	26492.5	9302.93	8157.69	27752.2	21855.5	15873.2	15917.4	27056.3	14596.4	32027.5	22433.3	37807.1	13536.6
POS	M147T290	147.082	290.129	15607.4	2388.12	3595.25	19007	18051.9	25962.8	59060	26590.7	60942.6	66871	11029.5	12589.6	9568.97	26423.4	11236.7	25290.9	21166.7	6105.11	5542.83	18096.4	9946.68	9916.77	9777.92	9542.38	8411.32	6015.45	27622.6	3962.48	8610.5	15938.2	8925.91	14039.1	15166.4	29448.9	6429.67	8519.16	13214.6	9084.02	6324.81	22459.8	10988.3	8026.13	12063.8	16395.9	2718.57	15662.3
POS	M147T228	147.074	228.21	11891.3	4572.94	10680.9	9565.28	5011.44	7650.87	8264.65	9182.76	4045.84	7711.76	8585.11	7709.31	3950.42	4219.96	10601.1	12093.5	4411.35	11946	6953.43	5897.28	4930.58	7358.31	6888.84	6061.33	6593.03	4537.14	7358.51	7223.82	1355.75	6251.23	4639.05	12368.2	5050.57	14253.6	8507.82	4600.6	10665.1	4616.78	12646.2	6961.57	6954.16	5951.69	12071.5	15472.5	10964.4	5659.47
POS	M147T18	147.089	18.431	3010.87	1770.54	3345.2	1482.66	4370.41	1341.07	2147.17	3269.21	1888.92	1244.31	1572.08	1454.39	1540.36	1767.97	1692.38	2028.79	1240.35	1538	800.895	2697.05	1616.16	3308.92	1925.68	3551.82	1298.32	1282.67	2052.68	1322.02	2466.53	2979.21	1614.14	1238.9	725.189	3369.65	1363.41	1331.89	547.258	1427.46	3889.34	2365.1	1665.14	892.592	3263.11	1607.31	1513.79	1186.37
POS	M147T4	147.089	3.792	1379.72	980.324	482.857	1435.25	1687.94	1412.42	1171.29	514.408	2028.92	1147.9	1790.49	1417.12	1373.89	837.732	2883.09	2810.78	1153.42	1595.79	1928.19	737.681	1452.74	2326.19	1824.9	1160.26	1503.57	1249.44	2289.87	866.898	1936.4	1263.05	1303.88	1295.02	1669.78	1418.9	1373.6	1788.12	1291.82	1354.85	1413.35	2061.06	1107.5	1316.37	1778.94	1501	1884.46	1385.11
POS	M147T47	147.099	46.651	34040.6	3037.26	22271.6	18674.1	19740.1	12208.1	23002.2	20484.9	14312.7	15084.8	4456.27	47296.6	48373.8	48057.3	40320.6	42531.2	27781.1	37196.1	28883	2621.58	29094	3234.51	3463.08	1963.96	1664.85	26114.7	23291.3	48800.6	2128.18	41599.6	3158.84	47499.1	7349.26	45465.3	12935.3	56774.3	37880.9	35344.1	34310.1	28856	35241.4	42194.7	28400.3	43710.3	27589.5	2218.44
POS	M147T231	147.099	231.149	2416.26	11954.2	13834.2	1165.31	13990.5	8489.95	12641.6	21167.8	12532.7	13774.6	10566.2	3081.73	2660.11	2540.06	2191.87	2704.96	15265.2	16360.2	10096.6	13971.2	9605	9321.1	7818.8	8341.9	14170	6889.67	7806.39	7855.18	11263.6	5960.03	18336.4	3092.1	16664.9	2666.92	975.277	1447.54	478.273	10513.7	18062.9	10898.1	15865	15846.8	3288.15	19410.8	16984.1	14236.4
POS	M147T451	147.11	451.11	56158.1	23374.5	50971.3	38253.4	63304.5	69090	48509.3	68456.4	43010.8	29689.1	33262.6	48914.6	60164.9	35331.6	35823.9	42950	45302.3	41775.1	38039.2	31327.6	28800.4	22067.9	33905.5	30801.4	36017.8	28933.7	30049.8	39342.9	35342.2	32627.1	31539.8	59514.4	19767.7	34625.3	48218.7	49488.2	32622.2	27358.8	33350.4	31305.6	38227.1	51548.6	54963.4	42448.2	42448	32319.8
[truncated: 24,676 more rows]
[truncated: 20 more columns]
