# Supplementary material for: Proteomic and metabolomic profiling of acupuncture for migraine reveals a correlative link via energy metabolism
Source: Front Neurosci. 2022 Sep 29;16:1013328. doi: 10.3389/fnins.2022.1013328 (PMC9557737; doi:10.3389/fnins.2022.1013328)
Supplement: Supplementary file 13 [file Table_5.XLSX]

## Sheet: Table S5
	Total	Expected	Hits	Raw p	LOG10(p)	Holm adjust	FDR	Impact
Ascorbate and aldarate metabolism	8	0.51613	2	0.089436	1.0485	1	0.98022	0.5
Arginine biosynthesis	14	0.90323	4	0.0098832	2.0051	0.82031	0.4151	0.46193
Alanine, aspartate and glutamate metabolism	28	1.8065	4	0.10136	0.99415	1	0.98022	0.44231
Taurine and hypotaurine metabolism	8	0.51613	2	0.089436	1.0485	1	0.98022	0.42857
Pentose and glucuronate interconversions	18	1.1613	3	0.10502	0.97871	1	0.98022	0.20312
Amino sugar and nucleotide sugar metabolism	37	2.3871	7	0.007789	2.1085	0.65428	0.4151	0.15925
Histidine metabolism	16	1.0323	4	0.01626	1.7889	1	0.43543	0.13934
Butanoate metabolism	15	0.96774	3	0.06727	1.1722	1	0.98022	0.11111
Purine metabolism	65	4.1935	9	0.020735	1.6833	1	0.43543	0.10779
D-Arginine and D-ornithine metabolism	4	0.25806	1	0.23435	0.63013	1	1	0
Riboflavin metabolism	4	0.25806	1	0.23435	0.63013	1	1	0
Linoleic acid metabolism	5	0.32258	1	0.28388	0.54687	1	1	1
Nitrogen metabolism	6	0.3871	1	0.33023	0.48119	1	1	0
D-Glutamine and D-glutamate metabolism	6	0.3871	1	0.33023	0.48119	1	1	0.5
Tryptophan metabolism	41	2.6452	2	0.7555	0.12177	1	1	0.10493
Pyruvate metabolism	22	1.4194	2	0.42051	0.37622	1	1	0.0902
Arginine and proline metabolism	38	2.4516	2	0.71653	0.14477	1	1	0.086
Valine, leucine and isoleucine biosynthesis	8	0.51613	1	0.4142	0.38279	1	1	0
Sulfur metabolism	8	0.51613	1	0.4142	0.38279	1	1	0.12766
Citrate cycle (TCA cycle)	20	1.2903	2	0.37367	0.42751	1	1	0.07685
Glycerophospholipid metabolism	36	2.3226	2	0.68779	0.16255	1	1	0.06739
One carbon pool by folate	9	0.58065	1	0.45219	0.34468	1	1	0
Valine, leucine and isoleucine degradation	40	2.5806	3	0.48334	0.31575	1	1	0.06097
Glutathione metabolism	28	1.8065	2	0.54914	0.26031	1	1	0.04664
Propanoate metabolism	23	1.4839	2	0.44327	0.35333	1	1	0.04061
Pantothenate and CoA biosynthesis	19	1.2258	2	0.34969	0.45632	1	1	0.03214
Galactose metabolism	27	1.7419	2	0.5291	0.27646	1	1	0.03152
Primary bile acid biosynthesis	46	2.9677	2	0.81029	0.09136	1	1	0.01563
Nicotinate and nicotinamide metabolism	15	0.96774	1	0.63398	0.19792	1	1	0
Fructose and mannose metabolism	20	1.2903	2	0.37367	0.42751	1	1	0
Folate biosynthesis	27	1.7419	2	0.5291	0.27646	1	1	0
Starch and sucrose metabolism	18	1.1613	1	0.701	0.15428	1	1	0.00974
Aminoacyl-tRNA biosynthesis	48	3.0968	3	0.60971	0.21487	1	1	0
Ether lipid metabolism	20	1.2903	1	0.73877	0.13149	1	1	0
Glyoxylate and dicarboxylate metabolism	32	2.0645	2	0.62329	0.20531	1	1	0
beta-Alanine metabolism	21	1.3548	1	0.75584	0.12157	1	1	0
Sphingolipid metabolism	21	1.3548	1	0.75584	0.12157	1	1	0.02434
Biosynthesis of unsaturated fatty acids	36	2.3226	2	0.68779	0.16255	1	1	0
Glycolysis / Gluconeogenesis	26	1.6774	1	0.82598	0.083029	1	1	0.00084
Porphyrin and chlorophyll metabolism	30	1.9355	1	0.86739	0.061785	1	1	0
Cysteine and methionine metabolism	33	2.129	1	0.8919	0.049686	1	1	0.02184
Arachidonic acid metabolism	36	2.3226	1	0.91191	0.040049	1	1	0.3135
Fatty acid elongation	39	2.5161	1	0.92825	0.032337	1	1	0
Pyrimidine metabolism	39	2.5161	1	0.92825	0.032337	1	1	0.0369
Fatty acid degradation	39	2.5161	1	0.92825	0.032337	1	1	0.04148
Tyrosine metabolism	42	2.7097	1	0.94158	0.026144	1	1	0.08872
