# Supplementary material for: Proteomic and metabolomic profiling of acupuncture for migraine reveals a correlative link via energy metabolism
Source: Front Neurosci. 2022 Sep 29;16:1013328. doi: 10.3389/fnins.2022.1013328 (PMC9557737; doi:10.3389/fnins.2022.1013328)
Supplement: Supplementary file 14 [file Table_6.XLSX]

## Sheet: Table S6
	Total	Expected	Hits	Raw p	LOG10(p)	Holm adjust	FDR	Impact
Glycolysis or Gluconeogenesis	61	2.575	14	1.0198e-07	6.9915	8.5663e-06	8.5663e-06	0.83333
Amino sugar and nucleotide sugar metabolism	79	3.3348	10	0.0014555	2.837	0.12081	0.042451	0.46154
Histidine metabolism	32	1.3508	6	0.0018108	2.7421	0.14848	0.042451	0.3871
Glutathione metabolism	56	2.3639	8	0.0020215	2.6943	0.16374	0.042451	0.34545
Pentose phosphate pathway	47	1.984	7	0.0030396	2.5172	0.24317	0.051066	0.95652
Fructose and mannose metabolism	40	1.6885	6	0.005831	2.2343	0.46065	0.081634	0.53846
Nitrogen metabolism	10	0.42213	3	0.00706	2.1512	0.55068	0.08472	0.44444
Starch and sucrose metabolism	43	1.8152	6	0.0083595	2.0778	0.64368	0.087775	0.30952
Pyruvate metabolism	45	1.8996	6	0.010432	1.9816	0.79287	0.097369	0.47727
Purine metabolism	166	7.0074	13	0.020228	1.694	1	0.16992	0.72121
Arginine biosynthesis	27	1.1398	4	0.024867	1.6044	1	0.1899	0.46154
Riboflavin metabolism	9	0.37992	2	0.052342	1.2812	1	0.36639	0.5
Citrate cycle (TCA cycle)	42	1.773	4	0.098446	1.0068	1	0.61029	0.53659
Ascorbate and aldarate metabolism	13	0.54877	2	0.10172	0.99261	1	0.61029	0.25
beta-Alanine metabolism	44	1.8574	4	0.11214	0.95025	1	0.62797	0.27907
Butanoate metabolism	29	1.2242	3	0.12095	0.9174	1	0.63498	0.14286
Propanoate metabolism	48	2.0262	4	0.14187	0.8481	1	0.66432	0.34043
Taurine and hypotaurine metabolism	16	0.67541	2	0.14437	0.84052	1	0.66432	0.33333
Pentose and glucuronate interconversions	32	1.3508	3	0.15026	0.82315	1	0.66432	0.29032
Neomycin, kanamycin and gentamicin biosynthesis	4	0.16885	1	0.15855	0.79983	1	0.66591	0.66667
Pantothenate and CoA biosynthesis	34	1.4352	3	0.17095	0.76712	1	0.68381	0.12121
Glyoxylate and dicarboxylate metabolism	56	2.3639	4	0.2092	0.67945	1	0.76681	0.16364
Phenylalanine metabolism	21	0.88648	2	0.22135	0.65492	1	0.76681	0.4
Ether lipid metabolism	39	1.6463	3	0.22576	0.64636	1	0.76681	0.13158
D-Arginine and D-ornithine metabolism	6	0.25328	1	0.22822	0.64165	1	0.76681	0.2
Alanine, aspartate and glutamate metabolism	61	2.575	4	0.2552	0.59312	1	0.82449	0.35
Drug metabolism - other enzymes	70	2.9549	4	0.34211	0.46584	1	1	0.086957
D-Glutamine and D-glutamate metabolism	10	0.42213	1	0.35087	0.45486	1	1	0.33333
Cysteine and methionine metabolism	71	2.9971	4	0.35191	0.45357	1	1	0.11429
Galactose metabolism	51	2.1529	3	0.3658	0.43676	1	1	0.36
Porphyrin and chlorophyll metabolism	53	2.2373	3	0.38919	0.40984	1	1	0.096154
Valine, leucine and isoleucine biosynthesis	12	0.50656	1	0.40474	0.39282	1	1	0.18182
Arginine and proline metabolism	78	3.2926	4	0.42032	0.37642	1	1	0.12987
Arachidonic acid metabolism	81	3.4193	4	0.44923	0.34754	1	1	0.375
Folate biosynthesis	61	2.575	3	0.48015	0.31863	1	1	0.1
Tyrosine metabolism	88	3.7148	4	0.51476	0.28839	1	1	0.16092
Linoleic acid metabolism	17	0.71762	1	0.52082	0.28331	1	1	0.75
Nicotinate and nicotinamide metabolism	42	1.773	2	0.53604	0.2708	1	1	0.21951
Sulfur metabolism	18	0.75984	1	0.54119	0.26665	1	1	0.41176
Biotin metabolism	21	0.88648	1	0.59729	0.22381	1	1	0.15
Biosynthesis of unsaturated fatty acids	47	1.984	2	0.59799	0.2233	1	1	0.043478
Pyrimidine metabolism	99	4.1791	4	0.60994	0.21471	1	1	0.37755
Aminoacyl-tRNA biosynthesis	74	3.1238	3	0.61282	0.21267	1	1	0.041096
Tryptophan metabolism	84	3.5459	3	0.69845	0.15586	1	1	0.096386
Glycerophospholipid metabolism	86	3.6303	3	0.71377	0.14644	1	1	0.082353
Valine, leucine and isoleucine degradation	88	3.7148	3	0.72849	0.13758	1	1	0.11494
Glycosylphosphatidylinositol (GPI)-anchor biosynthesis	31	1.3086	1	0.73959	0.13101	1	1	0.066667
One carbon pool by folate	31	1.3086	1	0.73959	0.13101	1	1	0.1
Glycerolipid metabolism	35	1.4775	1	0.78138	0.10714	1	1	0.088235
Inositol phosphate metabolism	69	2.9127	2	0.79818	0.097901	1	1	0.058824
Glycosaminoglycan degradation	44	1.8574	1	0.85266	0.069224	1	1	0.13953
Primary bile acid biosynthesis	92	3.8836	2	0.90867	0.041595	1	1	0.032967
Sphingolipid metabolism	58	2.4484	1	0.92049	0.03598	1	1	0.070175
Drug metabolism - cytochrome P450	98	4.1369	2	0.9264	0.033201	1	1	0.020619
Glycine, serine and threonine metabolism	68	2.8705	1	0.94894	0.022761	1	1	0.029851
Phosphatidylinositol signaling system	74	3.1238	1	0.96089	0.017325	1	1	0.027397
Fatty acid elongation	75	3.166	1	0.96259	0.016557	1	1	0.013514
Metabolism of xenobiotics by cytochrome P450	145	6.1209	2	0.98766	0.0053923	1	1	0.18056
Fatty acid degradation	102	4.3057	1	0.98884	0.0048759	1	1	0.079208
