# Supplementary material for: Proteomic and metabolomic profiling of acupuncture for migraine reveals a correlative link via energy metabolism
Source: Front Neurosci. 2022 Sep 29;16:1013328. doi: 10.3389/fnins.2022.1013328 (PMC9557737; doi:10.3389/fnins.2022.1013328)
Supplement: Supplementary file 15 [file Table_7.XLSX]

## Sheet: Table S7
	Total	Expected	Hits	Raw p	LOG10(p)	Holm adjust	FDR	Impact
Histidine metabolism	16	0.71226	3	0.031178	1.5062	1	0.65473	0.36065
Glyoxylate and dicarboxylate metabolism	32	1.4245	2	0.4213	0.37541	1	1	0.27513
Arginine biosynthesis	14	0.62323	3	0.021598	1.6656	1	0.65473	0.22843
Alanine, aspartate and glutamate metabolism	28	1.2465	2	0.35675	0.44764	1	1	0.20032
Arginine and proline metabolism	38	1.6916	5	0.024152	1.6171	1	0.65473	0.17162
Tryptophan metabolism	41	1.8252	2	0.55329	0.25704	1	1	0.10561
Arachidonic acid metabolism	36	1.6026	7	0.00075874	3.1199	0.063734	0.063734	0.08092
beta-Alanine metabolism	21	0.93484	2	0.23938	0.62091	1	1	0.05597
Glycine, serine and threonine metabolism	33	1.469	2	0.43694	0.35958	1	1	0.05034
Pyrimidine metabolism	39	1.7361	2	0.52579	0.27919	1	1	0.0256
Pantothenate and CoA biosynthesis	19	0.84581	3	0.049058	1.3093	1	0.68682	0.02143
Valine, leucine and isoleucine degradation	40	1.7806	2	0.53968	0.26787	1	1	0.01084
Valine, leucine and isoleucine biosynthesis	8	0.35613	2	0.04597	1.3375	1	0.68682	0
Aminoacyl-tRNA biosynthesis	48	2.1368	4	0.16172	0.79124	1	1	0
Amino sugar and nucleotide sugar metabolism	37	1.6471	2	0.49719	0.30348	1	1	0
