# Supplementary material for: Proteomic and metabolomic profiling of acupuncture for migraine reveals a correlative link via energy metabolism
Source: Front Neurosci. 2022 Sep 29;16:1013328. doi: 10.3389/fnins.2022.1013328 (PMC9557737; doi:10.3389/fnins.2022.1013328)
Supplement: Supplementary file 16 [file Table_8.XLSX]

## Sheet: Table S8
	Total	Expected	Hits	Raw p	LOG10(p)	Holm adjust	FDR	Impact
Arachidonic acid metabolism	81	1.4275	7	0.00041965	3.3771	0.035251	0.035251	0.2375
Pantothenate and CoA biosynthesis	34	0.59918	4	0.0026421	2.578	0.2193	0.11097	0.27273
Riboflavin metabolism	9	0.15861	2	0.010099	1.9957	0.82808	0.17476	0.5
Arginine and proline metabolism	78	1.3746	5	0.010912	1.9621	0.88386	0.17476	0.16883
Arginine biosynthesis	27	0.47582	3	0.011109	1.9543	0.88872	0.17476	0.26923
Nitrogen metabolism	10	0.17623	2	0.012483	1.9037	0.98614	0.17476	0.33333
Histidine metabolism	32	0.56393	3	0.017722	1.7515	1	0.18799	0.32258
Valine, leucine and isoleucine biosynthesis	12	0.21148	2	0.017904	1.7471	1	0.18799	0.18182
Glycolysis or Gluconeogenesis	61	1.075	4	0.021071	1.6763	1	0.19667	0.23333
Aminoacyl-tRNA biosynthesis	74	1.3041	4	0.039406	1.4044	1	0.33065	0.054795
Pyruvate metabolism	45	0.79303	3	0.043299	1.3635	1	0.33065	0.15909
D-Arginine and D-ornithine metabolism	6	0.10574	1	0.10129	0.99445	1	0.70901	0.2
Cysteine and methionine metabolism	71	1.2512	3	0.12773	0.8937	1	0.82534	0.042857
D-Glutamine and D-glutamate metabolism	10	0.17623	1	0.16317	0.78736	1	0.97901	0.11111
beta-Alanine metabolism	44	0.77541	2	0.18086	0.74265	1	1	0.13953
Propanoate metabolism	48	0.8459	2	0.20664	0.68478	1	1	0.085106
Taurine and hypotaurine metabolism	16	0.28197	1	0.24826	0.60509	1	1	0.066667
Glyoxylate and dicarboxylate metabolism	56	0.98689	2	0.25921	0.58634	1	1	0.12727
Alanine, aspartate and glutamate metabolism	61	1.075	2	0.2923	0.53418	1	1	0.16667
Vitamin B6 metabolism	21	0.37008	1	0.31267	0.50492	1	1	0.2
Glycine, serine and threonine metabolism	68	1.1984	2	0.33833	0.47066	1	1	0.074627
Amino sugar and nucleotide sugar metabolism	79	1.3922	2	0.40883	0.38846	1	1	0.064103
Pentose and glucuronate interconversions	32	0.56393	1	0.43597	0.36055	1	1	0.19355
Tryptophan metabolism	84	1.4803	2	0.43976	0.35678	1	1	0.060241
Valine, leucine and isoleucine degradation	88	1.5508	2	0.4639	0.33358	1	1	0.057471
Fructose and mannose metabolism	40	0.70492	1	0.51179	0.29091	1	1	0.051282
Pyrimidine metabolism	99	1.7447	2	0.52715	0.27806	1	1	0.05102
Biosynthesis of unsaturated fatty acids	47	0.82828	1	0.56989	0.24421	1	1	0.021739
Lysine degradation	49	0.86352	1	0.58521	0.23269	1	1	0.0625
Galactose metabolism	51	0.89877	1	0.6	0.22185	1	1	0.16
Porphyrin and chlorophyll metabolism	53	0.93402	1	0.61427	0.21164	1	1	0.038462
Fatty acid elongation	75	1.3217	1	0.74188	0.12967	1	1	0.027027
Tyrosine metabolism	88	1.5508	1	0.79678	0.098659	1	1	0.045977
Fatty acid degradation	102	1.7975	1	0.84316	0.07409	1	1	0.019802
Fatty acid biosynthesis	129	2.2734	1	0.90526	0.043229	1	1	0.015625
Purine metabolism	166	2.9254	1	0.95297	0.02092	1	1	0.0060606
